# Supplementary material for: Catalytic Asymmetric Synthesis of (N, N)-Spiroketal via Pd-Catalyzed Enantioconvergent Aminocarbonylation and Dearomative Nucleophilic Aza-Addition
Source: Research Square preprint supplement (doi:10.21203/rs.3.rs-6731621/v1), 2025-06-29

## checkCIF/PLATON report

Structure factors have been supplied for datablock(s) t

THIS REPORT IS FOR GUIDANCE ONLY. IF USED AS PART OF A REVIEW PROCEDURE FOR PUBLICATION, IT SHOULD NOT REPLACE THE EXPERTISE OF AN EXPERIENCED CRYSTALLOGRAPHIC REFEREE.

No syntax errors found.      CIF dictionary      Interpreting this report

### Datablock: t

---

Bond precision:      C-C = 0.0127 Å      Wavelength=1.54178

Cell:                      a=9.8911(4)                      b=15.4147(6)                      c=15.4438(7)  
                              alpha=87.166(2)                      beta=80.070(3)                      gamma=86.647(3)  
Temperature:              173 K

|                        | Calculated                  | Reported                    |
|------------------------|-----------------------------|-----------------------------|
| Volume                 | 2313.59(17)                 | 2313.59(17)                 |
| Space group            | P 1                         | P 1                         |
| Hall group             | P 1                         | P 1                         |
| Moiety formula         | C26 H18 Cl N3 O [+ solvent] | C26 H18 Cl N3 O [+ solvent] |
| Sum formula            | C26 H18 Cl N3 O [+ solvent] | C26 H18 Cl N3 O             |
| Mr                     | 423.88                      | 423.88                      |
| Dx, g cm <sup>-3</sup> | 1.217                       | 1.217                       |
| Z                      | 4                           | 4                           |
| Mu (mm <sup>-1</sup> ) | 1.627                       | 1.627                       |
| F000                   | 880.0                       | 880.0                       |
| F000'                  | 883.77                      |                             |
| h, k, lmax             | 11, 17, 17                  | 11, 17, 17                  |
| Nref                   | 15228[ 7614]                | 14698                       |
| Tmin, Tmax             | 0.783, 0.823                | 0.678, 0.753                |
| Tmin'                  | 0.783                       |                             |

Correction method= # Reported T Limits: Tmin=0.678 Tmax=0.753  
AbsCorr = MULTI-SCAN

Data completeness= 1.93/0.97      Theta(max)= 63.657

|                               |                   |
|-------------------------------|-------------------|
| R(reflections)= 0.0665( 8767) | wR2(reflections)= |
| S = 0.940                     | 0.1856( 14698)    |
| Npar= 1121                    |                   |

---

The following ALERTS were generated. Each ALERT has the format

**test-name\_ALERT\_alert-type\_alert-level.**

Click on the hyperlinks for more details of the test.

---

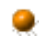

#### Alert level B

PLAT340\_ALERT\_3\_B Low Bond Precision on C-C Bonds ..... 0.01274 Ang.

---

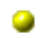

#### Alert level C

THETM01\_ALERT\_3\_C The value of  $\sin(\theta_{\max})/\text{wavelength}$  is less than 0.590  
Calculated  $\sin(\theta_{\max})/\text{wavelength} = 0.5812$   
PLAT089\_ALERT\_3\_C Poor Data / Parameter Ratio ( $Z_{\max} < 18$ ) ..... 6.79 Note  
PLAT213\_ALERT\_2\_C Atom Cl2 has ADP max/min Ratio ..... 4.0 prolat  
PLAT213\_ALERT\_2\_C Atom C30 has ADP max/min Ratio ..... 3.4 prolat  
PLAT213\_ALERT\_2\_C Atom C31 has ADP max/min Ratio ..... 3.2 prolat  
PLAT241\_ALERT\_2\_C High 'MainMol' Ueq as Compared to Neighbors of N5 Check  
PLAT241\_ALERT\_2\_C High 'MainMol' Ueq as Compared to Neighbors of C30 Check  
PLAT241\_ALERT\_2\_C High 'MainMol' Ueq as Compared to Neighbors of C57 Check  
PLAT242\_ALERT\_2\_C Low 'MainMol' Ueq as Compared to Neighbors of C29 Check  
PLAT242\_ALERT\_2\_C Low 'MainMol' Ueq as Compared to Neighbors of C31 Check  
PLAT242\_ALERT\_2\_C Low 'MainMol' Ueq as Compared to Neighbors of C56 Check  
PLAT250\_ALERT\_2\_C Large U3/U1 Ratio for Average U(i,j) Tensor .... 2.6 Note  
PLAT250\_ALERT\_2\_C Large U3/U1 Ratio for Average U(i,j) Tensor .... 2.2 Note  
PLAT911\_ALERT\_3\_C Missing FCF Refl Between Thmin & STh/L= 0.581 4 Report  
PLAT987\_ALERT\_1\_C The Flack x is >> 0 - Do a BASF/TWIN Refinement Please Check

---

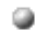

#### Alert level G

PLAT003\_ALERT\_2\_G Number of Uiso or Uij Restrained non-H Atoms ... 11 Report  
PLAT007\_ALERT\_5\_G Number of Unrefined Donor-H Atoms ..... 4 Report  
PLAT033\_ALERT\_4\_G Flack x Value Deviates > 3.0 \* sigma from Zero . 0.057 Note  
PLAT177\_ALERT\_4\_G The CIF-Embedded .res File Contains DELU Records 6 Report  
PLAT192\_ALERT\_3\_G A Non-default DELU Restraint Value for First Par 0.0010 Report  
PLAT192\_ALERT\_3\_G A Non-default DELU Restraint Value for First Par 0.0010 Report  
PLAT192\_ALERT\_3\_G A Non-default DELU Restraint Value for First Par 0.0010 Report  
PLAT192\_ALERT\_3\_G A Non-default DELU Restraint Value for First Par 0.0010 Report  
PLAT192\_ALERT\_3\_G A Non-default DELU Restraint Value for First Par 0.0010 Report  
PLAT192\_ALERT\_3\_G A Non-default DELU Restraint Value for First Par 0.0010 Report  
PLAT432\_ALERT\_2\_G Short Inter X...Y Contact O1 ..C43 . 2.95 Ang.  
1+x,y,z = 1\_655 Check  
PLAT432\_ALERT\_2\_G Short Inter X...Y Contact O2 ..C68 . 2.87 Ang.  
x,y,z = 1\_555 Check  
PLAT432\_ALERT\_2\_G Short Inter X...Y Contact O2 ..C69 . 3.00 Ang.  
x,y,z = 1\_555 Check  
PLAT432\_ALERT\_2\_G Short Inter X...Y Contact O3 ..C94 . 2.89 Ang.  
x,y,z = 1\_555 Check  
PLAT432\_ALERT\_2\_G Short Inter X...Y Contact O3 ..C95 . 2.96 Ang.  
x,y,z = 1\_555 Check  
PLAT432\_ALERT\_2\_G Short Inter X...Y Contact O4 ..C17 . 2.92 Ang.  
x,y,z = 1\_555 Check  
PLAT432\_ALERT\_2\_G Short Inter X...Y Contact O4 ..C19 . 2.98 Ang.  
x,y,z = 1\_555 Check  
PLAT434\_ALERT\_2\_G Short Inter HL..HL Contact Cl1 ..C12 . 3.35 Ang.  
1+x,y,-1+z = 1\_654 Check

|                   |                                                  |        |             |
|-------------------|--------------------------------------------------|--------|-------------|
| PLAT606_ALERT_4_G | Solvent Accessible VOID(S) in Structure .....    | !      | Info        |
| PLAT860_ALERT_3_G | Number of Least-Squares Restraints .....         | 9      | Note        |
| PLAT869_ALERT_4_G | ALERTS Related to the Use of SQUEEZE Suppressed  | !      | Info        |
| PLAT883_ALERT_1_G | No Info/Value for _atom_sites_solution_primary . |        | Please Do ! |
| PLAT899_ALERT_4_G | SHELXL2018 is Deprecated and Succeeded by SHELXL | 2019/3 | Note        |
| PLAT978_ALERT_2_G | Number C-C Bonds with Positive Residual Density. | 0      | Info        |

---

|    |                      |                                                              |
|----|----------------------|--------------------------------------------------------------|
| 0  | <b>ALERT level A</b> | = Most likely a serious problem - resolve or explain         |
| 1  | <b>ALERT level B</b> | = A potentially serious problem, consider carefully          |
| 15 | <b>ALERT level C</b> | = Check. Ensure it is not caused by an omission or oversight |
| 24 | <b>ALERT level G</b> | = General information/check it is not something unexpected   |

  

|    |                     |                                                              |
|----|---------------------|--------------------------------------------------------------|
| 2  | <b>ALERT type 1</b> | CIF construction/syntax error, inconsistent or missing data  |
| 21 | <b>ALERT type 2</b> | Indicator that the structure model may be wrong or deficient |
| 11 | <b>ALERT type 3</b> | Indicator that the structure quality may be low              |
| 5  | <b>ALERT type 4</b> | Improvement, methodology, query or suggestion                |
| 1  | <b>ALERT type 5</b> | Informative message, check                                   |

---

It is advisable to attempt to resolve as many as possible of the alerts in all categories. Often the minor alerts point to easily fixed oversights, errors and omissions in your CIF or refinement strategy, so attention to these fine details can be worthwhile. In order to resolve some of the more serious problems it may be necessary to carry out additional measurements or structure refinements. However, the purpose of your study may justify the reported deviations and the more serious of these should normally be commented upon in the discussion or experimental section of a paper or in the "special\_details" fields of the CIF. checkCIF was carefully designed to identify outliers and unusual parameters, but every test has its limitations and alerts that are not important in a particular case may appear. Conversely, the absence of alerts does not guarantee there are no aspects of the results needing attention. It is up to the individual to critically assess their own results and, if necessary, seek expert advice.

### Publication of your CIF in IUCr journals

A basic structural check has been run on your CIF. These basic checks will be run on all CIFs submitted for publication in IUCr journals (*Acta Crystallographica*, *Journal of Applied Crystallography*, *Journal of Synchrotron Radiation*); however, if you intend to submit to *Acta Crystallographica Section C* or *E* or *IUCrData*, you should make sure that full publication checks are run on the final version of your CIF prior to submission.

### Publication of your CIF in other journals

Please refer to the *Notes for Authors* of the relevant journal for any special instructions relating to CIF submission.

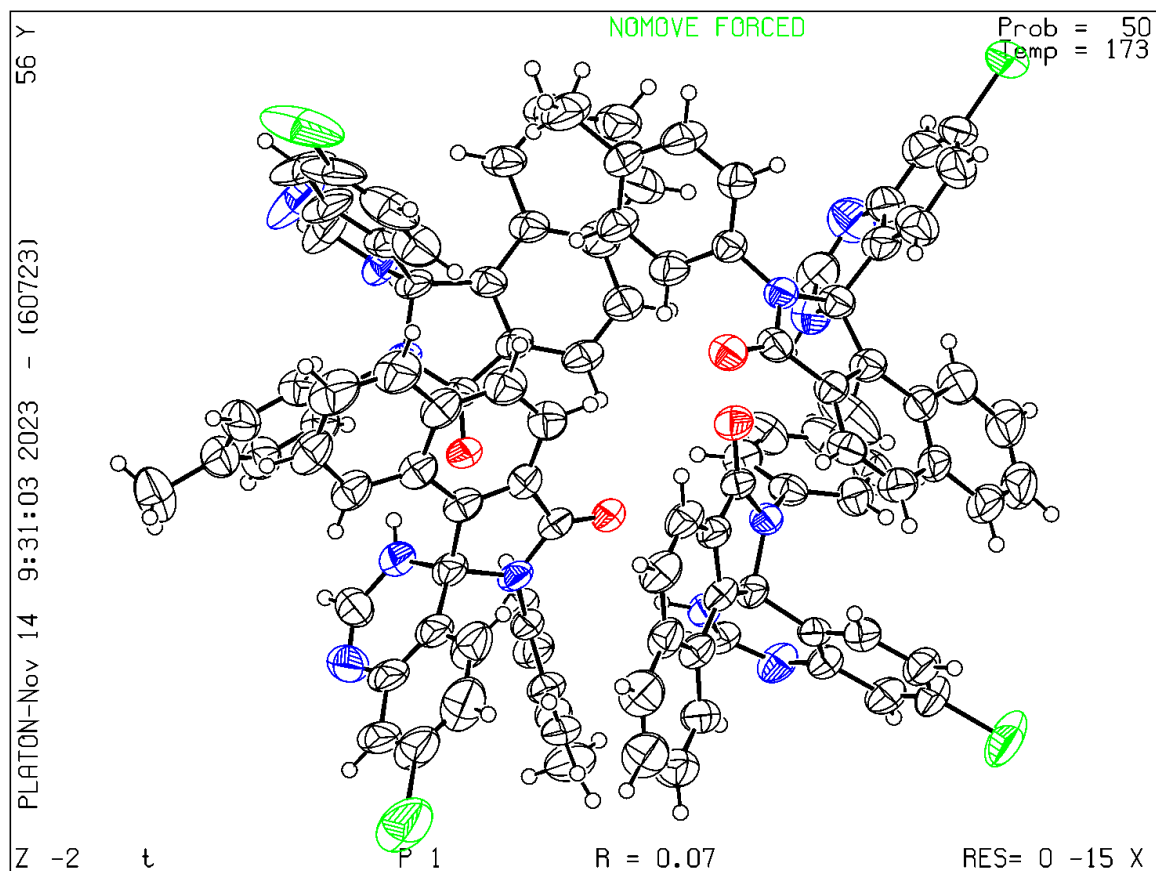

Supplement: Supplementary file 2 [file checkcif.pdf › sl-07-77-2-ݻصحح20231114SL_75165/checkcif.pdf]
