# Supplementary material for: Catalytic Asymmetric Synthesis of (N, N)-Spiroketal via Pd-Catalyzed Enantioconvergent Aminocarbonylation and Dearomative Nucleophilic Aza-Addition
Source: Research Square preprint supplement (doi:10.21203/rs.3.rs-6731621/v1), 2025-06-29

## checkCIF/PLATON report

Structure factors have been supplied for datablock(s) a

THIS REPORT IS FOR GUIDANCE ONLY. IF USED AS PART OF A REVIEW PROCEDURE FOR PUBLICATION, IT SHOULD NOT REPLACE THE EXPERTISE OF AN EXPERIENCED CRYSTALLOGRAPHIC REFEREE.

No syntax errors found.      CIF dictionary      Interpreting this report

### Datablock: a

---

|                 |                                            |                                            |               |
|-----------------|--------------------------------------------|--------------------------------------------|---------------|
| Bond precision: | C-C = 0.0342 A                             | Wavelength=1.54184                         |               |
| Cell:           | a=24.0503 (6)                              | b=12.2870 (2)                              | c=30.3447 (8) |
|                 | alpha=90                                   | beta=109.212 (3)                           | gamma=90      |
| Temperature:    | 100 K                                      |                                            |               |
|                 | Calculated                                 | Reported                                   |               |
| Volume          | 8467.7 (4)                                 | 8467.7 (4)                                 |               |
| Space group     | C 2                                        | C 2                                        |               |
| Hall group      | C 2y                                       | C 2y                                       |               |
| Moiety formula  | 3(C28 H23 Au Cl N3 O), H2 O<br>[+ solvent] | 3(C28 H23 Au Cl N3 O), H2 O<br>[+ solvent] |               |
| Sum formula     | C84 H71 Au3 Cl3 N9 O4 [+<br>solvent]       | C84 H71 Au3 Cl3 N9 O4                      |               |
| Mr              | 1967.76                                    | 1967.74                                    |               |
| Dx, g cm-3      | 1.543                                      | 1.544                                      |               |
| Z               | 4                                          | 4                                          |               |
| Mu (mm-1)       | 10.855                                     | 10.855                                     |               |
| F000            | 3832.0                                     | 3832.0                                     |               |
| F000'           | 3791.65                                    |                                            |               |
| h, k, lmax      | 30, 15, 38                                 | 29, 15, 37                                 |               |
| Nref            | 17643 [ 9251]                              | 12598                                      |               |
| Tmin, Tmax      | 0.220, 0.219                               | 0.660, 1.000                               |               |
| Tmin'           | 0.141                                      |                                            |               |

Correction method= # Reported T Limits: Tmin=0.660 Tmax=1.000  
AbsCorr = MULTI-SCAN

Data completeness= 1.36/0.71      Theta(max)= 75.938

R(reflections)= 0.0562( 9952)

wR2(reflections)=  
0.1703( 12598)

S = 0.900

Npar= 919

The following ALERTS were generated. Each ALERT has the format

**test-name\_ALERT\_alert-type\_alert-level.**

Click on the hyperlinks for more details of the test.

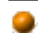

### Alert level B

|                   |                                                  |        |              |
|-------------------|--------------------------------------------------|--------|--------------|
| PLAT201_ALERT_2_B | Isotropic non-H Atoms in Main Residue(s) .....   | 2      | Report       |
|                   | C34 C83                                          |        |              |
| PLAT213_ALERT_2_B | Atom C82 has ADP max/min Ratio .....             | 4.4    | oblate       |
| PLAT220_ALERT_2_B | NonSolvent Resd 2 C Ueq(max)/Ueq(min) Range      | 9.6    | Ratio        |
| PLAT241_ALERT_2_B | High 'MainMol' Ueq as Compared to Neighbors of   | C83    | Check        |
| PLAT242_ALERT_2_B | Low 'MainMol' Ueq as Compared to Neighbors of    | C78    | Check        |
| PLAT242_ALERT_2_B | Low 'MainMol' Ueq as Compared to Neighbors of    | C80    | Check        |
| PLAT342_ALERT_3_B | Low Bond Precision on C-C Bonds .....            | 0.0342 | Ang.         |
| PLAT420_ALERT_2_B | D-H Bond Without Acceptor O39 --H39A .           |        | Please Check |
| PLAT420_ALERT_2_B | D-H Bond Without Acceptor O39 --H39B .           |        | Please Check |
| PLAT915_ALERT_3_B | No Flack x Check Done: Low Friedel Pair Coverage | 47     | %            |
| PLAT971_ALERT_2_B | Check Calcd Resid. Dens. 1.18Ang From Au3        | 2.52   | eA-3         |

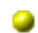

### Alert level C

|                   |                                                           |       |                |
|-------------------|-----------------------------------------------------------|-------|----------------|
| PLAT213_ALERT_2_C | Atom C81 has ADP max/min Ratio .....                      | 3.9   | prolat         |
| PLAT222_ALERT_3_C | NonSolvent Resd 2 H Uiso(max)/Uiso(min) Range             | 8.4   | Ratio          |
| PLAT234_ALERT_4_C | Large Hirshfeld Difference C18 --C19 .                    | 0.21  | Ang.           |
| PLAT234_ALERT_4_C | Large Hirshfeld Difference C21 --C26 .                    | 0.20  | Ang.           |
| PLAT234_ALERT_4_C | Large Hirshfeld Difference C31 --C32 .                    | 0.22  | Ang.           |
| PLAT241_ALERT_2_C | High 'MainMol' Ueq as Compared to Neighbors of            | C82   | Check          |
| PLAT241_ALERT_2_C | High 'MainMol' Ueq as Compared to Neighbors of            | C41   | Check          |
| PLAT241_ALERT_2_C | High 'MainMol' Ueq as Compared to Neighbors of            | C76   | Check          |
| PLAT241_ALERT_2_C | High 'MainMol' Ueq as Compared to Neighbors of            | C88   | Check          |
| PLAT242_ALERT_2_C | Low 'MainMol' Ueq as Compared to Neighbors of             | C77   | Check          |
| PLAT242_ALERT_2_C | Low 'MainMol' Ueq as Compared to Neighbors of             | N7    | Check          |
| PLAT242_ALERT_2_C | Low 'MainMol' Ueq as Compared to Neighbors of             | C70   | Check          |
| PLAT250_ALERT_2_C | Large U3/U1 Ratio for <U(i,j)> Tensor(Resd 2)             | 2.8   | Note           |
| PLAT331_ALERT_2_C | Small Aver Phenyl C-C Dist C70 --C75 .                    | 1.37  | Ang.           |
| PLAT332_ALERT_2_C | Large Phenyl C-C Range C70 -C75 .                         | 0.18  | Ang.           |
| PLAT363_ALERT_2_C | Long C(sp3)-C(sp2) Bond C73 - C78 .                       | 1.63  | Ang.           |
| PLAT411_ALERT_2_C | Short Inter H...H Contact H35 ..H77 .                     | 2.14  | Ang.           |
|                   | 1/2-x,1/2+y,-z =                                          | 4_555 | Check          |
| PLAT752_ALERT_4_C | Angle Calc 103.00, Rep 103(6) .....                       |       | Senseless s.u. |
|                   | H39A -O39 -H39B 1_555 1_555 1_555 # 60                    |       | Check          |
| PLAT911_ALERT_3_C | Missing FCF Refl Between Thmin & STh/L= 0.600             | 110   | Report         |
|                   | 11 13 0, 22 0 0, -13 13 1, 11 13 1, 21 9 1, 22 0 1,       |       |                |
|                   | -16 0 2, 11 13 2, 21 9 2, -16 0 3, 11 13 3, -16 0 4,      |       |                |
|                   | -8 14 4, 2 0 4, 11 13 4, 14 12 4, 18 10 4, 19 9 4,        |       |                |
|                   | -23 5 5, -16 0 5, -14 10 5, -2 0 5, 14 12 5, 19 9 5,      |       |                |
|                   | -23 5 6, -16 0 6, -14 10 6, 15 11 6, 20 0 6, -28 0 7,     |       |                |
|                   | -23 5 7, -16 0 7, -14 10 7, 19 9 7, 20 0 7, -28 0 8,      |       |                |
|                   | -23 5 8, -16 0 8, -14 10 8, 15 11 8, -28 0 9, -23 5 9,    |       |                |
|                   | -16 0 9, -14 0 9, -14 10 9, -23 5 10, -16 0 10, -14 0 10, |       |                |
|                   | -23 5 11, -16 0 11, 20 6 11, 21 5 11, -24 8 12, -23 5 12, |       |                |

|                   |        |                                    |            |            |            |            |
|-------------------|--------|------------------------------------|------------|------------|------------|------------|
| -16               | 0 12,  | -14 10 12,                         | 0 8 12,    | 19 7 12,   | 20 4 12,   | -14 10 13, |
| 0                 | 8 13,  | 19 3 13,                           | -23 7 14,  | -13 11 14, | 18 4 14,   | -28 0 15,  |
| -23               | 5 15,  | -23 7 15,                          | -13 11 15, | -28 0 16,  | -22 8 16,  | -13 11 16, |
| -28               | 0 17,  | -13 11 17,                         | -4 10 17,  | -28 0 18,  | -16 10 18, | -15 9 18,  |
| -13               | 11 18, | -4 10 18,                          | -28 0 19,  | -16 10 19, | -13 11 19, | -4 0 19,   |
| -16               | 10 20, | -13 11 20,                         | -18 0 21,  | -16 10 21, | -13 11 21, | -18 0 22,  |
| -16               | 10 22, | -18 0 23,                          | -16 10 23, | 1 5 23,    | 10 0 23,   | -18 0 24,  |
| PLAT971_ALERT_2_C | Check  | Calcd Resid. Dens.                 | 1.03Ang    | From Au1   |            | 2.15 eA-3  |
| PLAT971_ALERT_2_C | Check  | Calcd Resid. Dens.                 | 0.97Ang    | From Au2   |            | 2.01 eA-3  |
| PLAT971_ALERT_2_C | Check  | Calcd Resid. Dens.                 | 1.01Ang    | From Au1   |            | 1.97 eA-3  |
| PLAT971_ALERT_2_C | Check  | Calcd Resid. Dens.                 | 0.90Ang    | From Au2   |            | 1.72 eA-3  |
| PLAT972_ALERT_2_C | Check  | Calcd Resid. Dens.                 | 0.74Ang    | From Au1   |            | -2.25 eA-3 |
| PLAT972_ALERT_2_C | Check  | Calcd Resid. Dens.                 | 0.85Ang    | From Au1   |            | -2.06 eA-3 |
| PLAT972_ALERT_2_C | Check  | Calcd Resid. Dens.                 | 0.74Ang    | From Au2   |            | -2.03 eA-3 |
| PLAT972_ALERT_2_C | Check  | Calcd Resid. Dens.                 | 0.81Ang    | From Au1   |            | -2.02 eA-3 |
| PLAT972_ALERT_2_C | Check  | Calcd Resid. Dens.                 | 0.82Ang    | From Au1   |            | -1.95 eA-3 |
| PLAT972_ALERT_2_C | Check  | Calcd Resid. Dens.                 | 0.71Ang    | From Au3   |            | -1.93 eA-3 |
| PLAT972_ALERT_2_C | Check  | Calcd Resid. Dens.                 | 0.77Ang    | From Au3   |            | -1.76 eA-3 |
| PLAT972_ALERT_2_C | Check  | Calcd Resid. Dens.                 | 0.88Ang    | From Au3   |            | -1.52 eA-3 |
| PLAT972_ALERT_2_C | Check  | Calcd Resid. Dens.                 | 0.97Ang    | From Au2   |            | -1.52 eA-3 |
| PLAT973_ALERT_2_C | Check  | Calcd Positive Resid. Density on   |            | Au1        |            | 1.48 eA-3  |
| PLAT977_ALERT_2_C | Check  | Negative Difference Density on H81 |            | .          |            | -0.32 eA-3 |
| PLAT977_ALERT_2_C | Check  | Negative Difference Density on H83 |            | .          |            | -0.35 eA-3 |

## ● Alert level G

|                   |                                                            |              |        |
|-------------------|------------------------------------------------------------|--------------|--------|
| PLAT002_ALERT_2_G | Number of Distance or Angle Restraints on AtSite           | 3            | Note   |
| PLAT003_ALERT_2_G | Number of Uiso or U(i,j) Restrained non-H-Atoms            | 8            | Report |
| PLAT172_ALERT_4_G | The CIF-Embedded .res File Contains DFIX Records           | 1            | Report |
| PLAT173_ALERT_4_G | The CIF-Embedded .res File Contains DANG Records           | 1            | Report |
| PLAT177_ALERT_4_G | The CIF-Embedded .res File Contains DELU Records           | 4            | Report |
| PLAT186_ALERT_4_G | The CIF-Embedded .res File Contains ISOR Records           | 1            | Report |
| PLAT192_ALERT_3_G | A Non-default DELU Restraint Value for First Par           | 0.0010       | Report |
| PLAT192_ALERT_3_G | A Non-default DELU Restraint Value for SecondPar           | 0.0010       | Report |
| PLAT192_ALERT_3_G | A Non-default DELU Restraint Value for First Par           | 0.0010       | Report |
| PLAT192_ALERT_3_G | A Non-default DELU Restraint Value for SecondPar           | 0.0010       | Report |
| PLAT192_ALERT_3_G | A Non-default DELU Restraint Value for First Par           | 0.0010       | Report |
| PLAT192_ALERT_3_G | A Non-default DELU Restraint Value for First Par           | 0.0010       | Report |
| PLAT606_ALERT_4_G | Solvent Accessible VOID(S) in Structure .....              | !            | Info   |
| PLAT791_ALERT_4_G | Model has Chirality at C7 (Sohncke SpGr)                   | R            | Verify |
| PLAT791_ALERT_4_G | Model has Chirality at C29 (Sohncke SpGr)                  | R            | Verify |
| PLAT791_ALERT_4_G | Model has Chirality at C65 (Sohncke SpGr)                  | R            | Verify |
| PLAT860_ALERT_3_G | Number of Least-Squares Restraints .....                   | 8            | Note   |
| PLAT869_ALERT_4_G | ALERTS Related to the Use of SQUEEZE Suppressed            | !            | Info   |
| PLAT883_ALERT_1_G | Absent Datum for _atom_sites_solution_primary ..           | Please Do !  |        |
| PLAT899_ALERT_4_G | SHELXL2018 is Outdated and Succeeded by SHELXL             | 2019/3       | Note   |
| PLAT910_ALERT_3_G | Missing # of FCF Reflection(s) Below Theta(Min).           | 1            | Note   |
|                   | 0 0 1,                                                     |              |        |
| PLAT912_ALERT_4_G | Missing # of FCF Reflections Above STh/L= 0.600            | 430          | Note   |
| PLAT933_ALERT_2_G | Number of HKL-OMIT Records in Embedded .res File           | 2            | Note   |
|                   | -2 0 5, 2 0 4,                                             |              |        |
| PLAT941_ALERT_3_G | Average HKL Measurement Multiplicity .....                 | 2.9          | Low    |
| PLAT965_ALERT_2_G | The SHELXL WEIGHT Optimisation has not Converged           | Please Check |        |
| PLAT969_ALERT_5_G | The 'Henn et al.' R-Factor-gap value .....                 | 3.595        | Note   |
|                   | Predicted wR2: Based on SigI**2 4.74 or SHELX Weight 18.92 |              |        |
| PLAT978_ALERT_2_G | Number C-C Bonds with Positive Residual Density.           | 0            | Info   |

---

|    |                      |                                                              |
|----|----------------------|--------------------------------------------------------------|
| 0  | <b>ALERT level A</b> | = Most likely a serious problem - resolve or explain         |
| 11 | <b>ALERT level B</b> | = A potentially serious problem, consider carefully          |
| 35 | <b>ALERT level C</b> | = Check. Ensure it is not caused by an omission or oversight |
| 27 | <b>ALERT level G</b> | = General information/check it is not something unexpected   |
|    |                      |                                                              |
| 1  | ALERT type 1         | CIF construction/syntax error, inconsistent or missing data  |
| 43 | ALERT type 2         | Indicator that the structure model may be wrong or deficient |
| 13 | ALERT type 3         | Indicator that the structure quality may be low              |
| 15 | ALERT type 4         | Improvement, methodology, query or suggestion                |
| 1  | ALERT type 5         | Informative message, check                                   |

---

It is advisable to attempt to resolve as many as possible of the alerts in all categories. Often the minor alerts point to easily fixed oversights, errors and omissions in your CIF or refinement strategy, so attention to these fine details can be worthwhile. In order to resolve some of the more serious problems it may be necessary to carry out additional measurements or structure refinements. However, the purpose of your study may justify the reported deviations and the more serious of these should normally be commented upon in the discussion or experimental section of a paper or in the "special\_details" fields of the CIF. checkCIF was carefully designed to identify outliers and unusual parameters, but every test has its limitations and alerts that are not important in a particular case may appear. Conversely, the absence of alerts does not guarantee there are no aspects of the results needing attention. It is up to the individual to critically assess their own results and, if necessary, seek expert advice.

### **Publication of your CIF in IUCr journals**

A basic structural check has been run on your CIF. These basic checks will be run on all CIFs submitted for publication in IUCr journals (*Acta Crystallographica*, *Journal of Applied Crystallography*, *Journal of Synchrotron Radiation*); however, if you intend to submit to *Acta Crystallographica Section C* or *E* or *IUCrData*, you should make sure that full publication checks are run on the final version of your CIF prior to submission.

### **Publication of your CIF in other journals**

Please refer to the *Notes for Authors* of the relevant journal for any special instructions relating to CIF submission.

Datablock a - ellipsoid plot

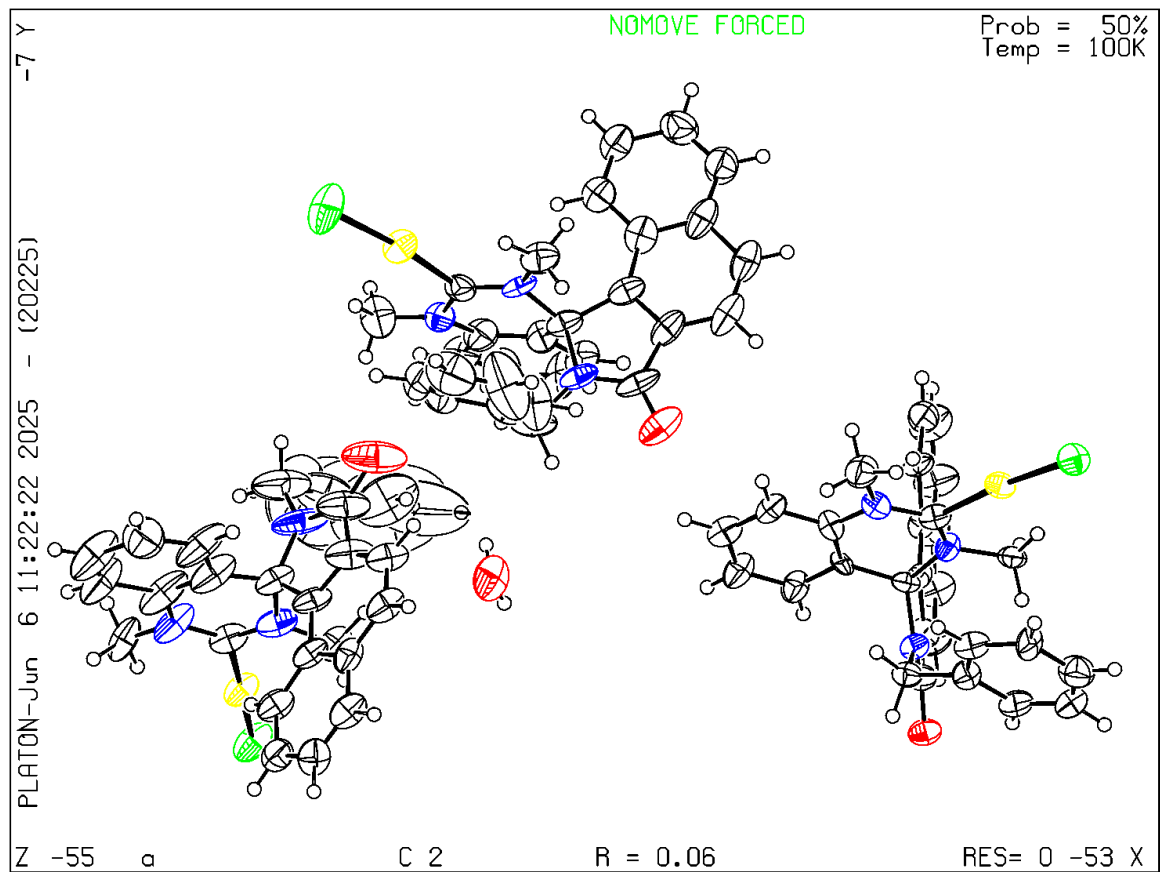

Supplement: Supplementary file 4 [file checkcif.pdf › 20250606SL-手性/checkcif.pdf]
