# Supplementary material for: Catalytic Asymmetric Synthesis of (N, N)-Spiroketal via Pd-Catalyzed Enantioconvergent Aminocarbonylation and Dearomative Nucleophilic Aza-Addition
Source: Research Square preprint supplement (doi:10.21203/rs.3.rs-6731621/v1), 2025-06-29
Supplement: Supplementary file 5 [file f9dbca600df559220ba932bf.pdf]

# Supporting Information

## Catalytic Asymmetric Synthesis of (*N,N*)-Spiroketal via Pd-Catalyzed Enantioconvergent Aminocarbonylation and Dearomative Nucleophilic Aza-Addition

Lei Su, Shen Gao,\* and Jiawang Liu\*

Frontiers Science Center for Transformative Molecules, State Key Laboratory of Synergistic Chem-Bio Synthesis, Shanghai Key Laboratory for Molecular Engineering of Chiral Drugs, School of Chemistry and Chemical Engineering, Shanghai Jiao Tong University, Shanghai 200240, China

E-mail: gaoshen2000@sjtu.edu.cn (S.G.), liujw2020@sjtu.edu.cn (J.L.)

### Table of Contents

|                                                                                             |     |
|---------------------------------------------------------------------------------------------|-----|
| General Information.....                                                                    | 2   |
| 1. Syntheses of substrates.....                                                             | 3   |
| 2. Pd-catalyzed asymmetric aminocarbonylation and dearomative aza-addition.....             | 12  |
| 2.1. General procedure for screening of reaction conditions .....                           | 12  |
| 2.1.1 Optimization of reaction conditions involving alkylamines .....                       | 13  |
| 2.1.2 Optimization of reaction conditions involving arylamines.....                         | 15  |
| 2.2 Characterization data of products.....                                                  | 17  |
| 2.3 Inefficient heterobiaryl triflates.....                                                 | 47  |
| 2.4 Crystal data of compounds <b>5da</b> 、 <b>9b</b> 、 <b>10b</b> 、 <b>11</b> . ....        | 50  |
| 3. Mechanistic studies.....                                                                 | 58  |
| 3.1 Procedure for synthesis of <b>12</b> .....                                              | 58  |
| 3.2 Kinetic experiments using ( <i>rac</i> )- <b>1a</b> with <b>2a</b> and <b>3a</b> . .... | 59  |
| 3.3 Non-linear effect.....                                                                  | 61  |
| 3.4 Stability experiments of products <b>5da</b> .....                                      | 64  |
| 4. Synthetic application of the methodology.....                                            | 65  |
| 4.1 Scale up reaction of product <b>4ac</b> .....                                           | 65  |
| 4.2 Procedure for synthesis of <b>6</b> .....                                               | 66  |
| 4.3 Procedure for synthesis of <b>7</b> .....                                               | 67  |
| 4.4 Procedure for synthesis of <b>8a</b> 、 <b>8b</b> 、 <b>8c</b> 、 <b>8d</b> . ....         | 67  |
| 4.5 Procedure for synthesis of Rh complex <b>9</b> . ....                                   | 70  |
| 4.6 Procedure for synthesis of Ir complex <b>10</b> . ....                                  | 71  |
| 4.7 Procedure for synthesis of Au complex <b>11</b> . ....                                  | 73  |
| 4.8 Procedure for synthesis of Pd complex <b>13a</b> .....                                  | 74  |
| References.....                                                                             | 75  |
| NMR Spectra .....                                                                           | 76  |
| HPLC Chromatograms.....                                                                     | 196 |

## General Information

Unless otherwise noted, all reactions and manipulations were performed using standard Schlenk techniques or in a glovebox. All the chemicals were commercially purchased from Adamas-beta, Energy Chemical, Aladdin, Bide, Daicel Chiral Technologies (China) Co., and directly used without further purification. Anhydrous  $\text{CH}_2\text{Cl}_2$ , DCE, DME, DMF, THF, 1,4-Dioxane, and acetic ether were purchased from Adamas-beta.  $^1\text{H}$ ,  $^{13}\text{C}$ , and  $^{19}\text{F}$  NMR spectra were recorded on Bruker Avance 500 MHz spectrometer at STP unless otherwise indicated.  $^1\text{H}$  NMR and  $^{13}\text{C}$  NMR chemical shifts were reported in  $\delta$  units, parts per million (ppm) relative to the chemical shift of residual solvent. Reference peaks for chloroform in  $^1\text{H}$  NMR and  $^{13}\text{C}$  NMR spectra were set at 7.26 ppm and 77.16 ppm, respectively. Multiplicities are reported using the following abbreviations: s, singlet; d, doublet; t, triplet; q, quartet; m, multiplet; *br*, broad. High-resolution mass spectra (HRMS) were obtained using a Bruker APEXIII 7.0 and IonSpec 4.7 TESLA FTMS. Optical rotations were determined using a Perkin Elmer 341 MC polarimeter. HPLC analyses were performed on a Agilent 7890 liquid chromatograph.



# 1. Syntheses of substrates

## 1.1 Syntheses of Heterobiaryl triflates

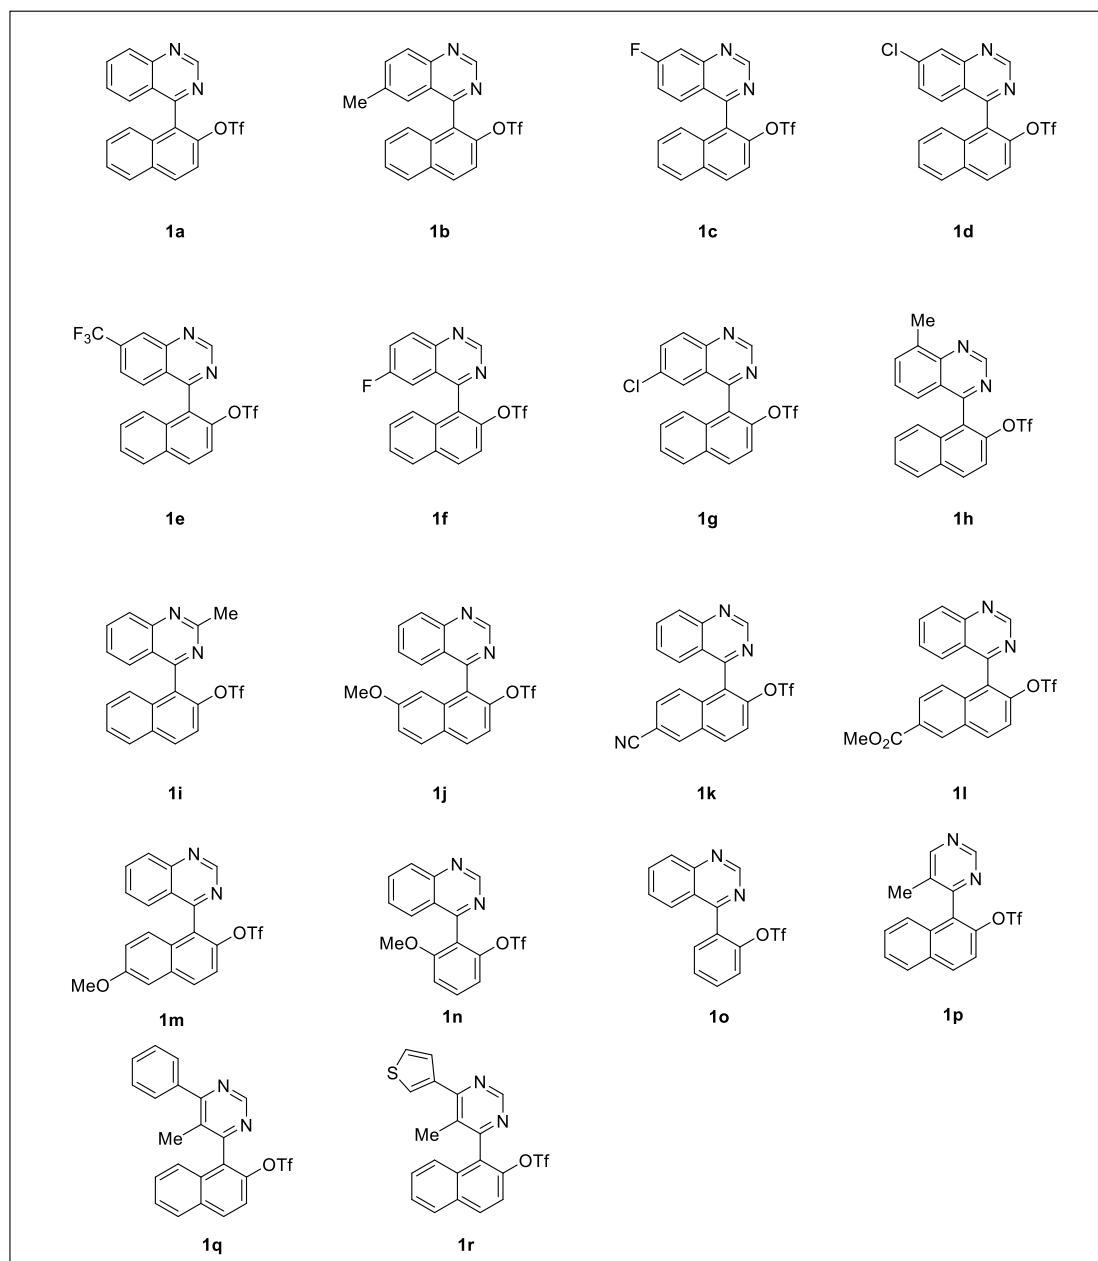

Compounds **1a**, **1i**<sup>[1]</sup> are known compounds, and they were synthesized according to the literature procedure. The preparation of new compounds **1b-1h**<sup>[1-2]</sup>, **1n-1r**<sup>[1-2]</sup>, **1j-1m**<sup>[3]</sup> characterization data are provided as follows.

**General procedure I to synthesize heterobiaryl triflates<sup>[1-2]</sup>.**

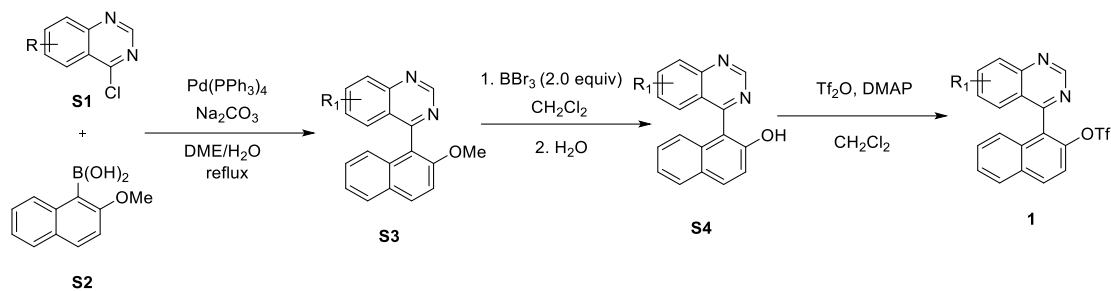

**Step-1:** 2-Substituted-4-chloroquinazoline (10 mmol), 2-methoxy-1-naphthyl boronic acid (12 mmol)  $\text{Na}_2\text{CO}_3$  (24 mmol), tetrakis(triphenylphosphine) palladium (0) (0.5 mmol) were added in a 250 mL Schlenk tube and replace with nitrogen three times. Then DME (30 mL),  $\text{H}_2\text{O}$  (15 mL) were added. And the solution was refluxed under nitrogen for 2d until **S3** was fully consumed as monitored by TLC analysis. The solution was cooled to room temperature, then diluted with EtOAc (20.0 mL) and water (20.0 mL). The aqueous phase was extracted with EtOAc. The combined organic phase was washed with brine, dried over  $\text{MgSO}_4$  and concentrated *in vacuo*. The residue was purified by flash column chromatography (1:3 EtOAc:hexanes) on silica gel to give the corresponding **S2**.

**Step-2:** The corresponding **S3** was added to a 100 mL round bottom flask and dissolved with DCM stirred at 0 °C. Boron tribromide was added slowly via syringe, and the reaction was stirred overnight (16 h) under an atmosphere of nitrogen. Because of the light-sensitive nature of boron tribromide, the reaction vessel was covered with aluminum foil for the duration of the reaction. Distilled water was added slowly to the solution at 0 °C. An orange precipitate was formed after 15 min and was allowed to stir for an additional 1h. The aqueous phase was extracted with DCM for three times. The combined organic phase was washed with brine, dried over  $\text{MgSO}_4$  and concentrated *in vacuo*. **S4** was isolated as a light orange powder and was used for next step without purification.

**Step-3:** To a solution of **S4** and DMAP (2.0 equiv.) in  $\text{CH}_2\text{Cl}_2$  was added  $\text{Tf}_2\text{O}$  (1.2 equiv.) dropwise at 0 °C. The reaction mixture was stirred at 25 °C until **S4** was fully consumed as monitored by TLC analysis. The reaction mixture was diluted with  $\text{CH}_2\text{Cl}_2$  and  $\text{Na}_2\text{CO}_3$  aq. The aqueous phase was extracted with  $\text{CH}_2\text{Cl}_2$ . The combined organic phase was washed with brine, dried over  $\text{MgSO}_4$

and concentrated *in vacuo*. The residue was purified by flash column chromatography (1:20 EtOAc: hexanes) on silica gel to give the corresponding triflate substrates.

#### 1-(quinazolin-4-yl)naphthalen-2-yl trifluoromethanesulfonate (**1a**)<sup>[1]</sup>.

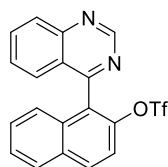

From 4-chloroquinazoline (10 mmol, 1.82 g), following the General procedure I described above, compound **1a** (7.2 mmol, 2.9 g) was obtained in 72% yield as a white solid; <sup>1</sup>H NMR (400 MHz, Chloroform-*d*): δ 9.56 (s, 1H), 8.23-8.22 (m, 1H), 8.16-8.14 (m, 1H), 8.03-8.01 (m, 1H), 7.98-7.93 (m, 1H), 7.63-7.57 (m, 2H), 7.55-7.50 (m, 1H), 7.48-7.43 (m, 2H), 7.28-7.26 (m, 1H) ppm. <sup>19</sup>F NMR (376 MHz, Chloroform-*d*): δ -74.31 ppm. <sup>13</sup>C NMR (100 MHz, Chloroform-*d*): δ 163.4, 155.0, 150.8, 144.7, 134.7, 132.5, 132.4, 132.3, 129.2, 128.6, 128.5, 127.6, 127.0, 126.6, 126.1, 125.1, 122.0, 119.6, 119.5, 116.9, 114.4 ppm.

#### 1-(6-methylquinazolin-4-yl) naphthalen-2-yl trifluoromethanesulfonate (**1b**).

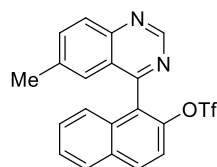

From 4-chloro-6-methylquinazoline (10 mmol, 1.78 g), following the General procedure I described above, compound **1b** (5.0 mmol, 2.1 g) was obtained in 50% yield as a yellow solid; <sup>1</sup>H NMR (500 MHz, Chloroform-*d*) δ 9.50 (s, 1H), 8.22-8.06 (m, 2H), 8.06-7.96 (m, 1H), 7.84-7.74 (m, 1H), 7.68-7.56 (m, 2H), 7.49-7.41 (m, 1H), 7.31-7.23 (m, 1H), 7.20 (s, 1H), 2.39 (s, 3H) ppm. <sup>19</sup>F NMR (471 MHz, Chloroform-*d*) δ -74.23 ppm. <sup>13</sup>C NMR (125 MHz, Chloroform-*d*) δ 162.5, 154.2, 149.4, 144.7, 139.0, 137.1, 132.5, 132.4, 132.2, 128.8, 128.6, 128.5, 127.6, 127.1, 126.1, 125.1, 124.9, 122.0, 119.5, 117.0, 21.9 ppm. HRMS (ESI) *m/z* calculated for C<sub>20</sub>H<sub>13</sub>F<sub>3</sub>N<sub>2</sub>O<sub>2</sub>SNa<sup>+</sup> [M+Na]<sup>+</sup>: 441.0497, found 441.0493.

#### 1-(7-fluoroquinazolin-4-yl) naphthalen-2-yl trifluoromethanesulfonate (**1c**).

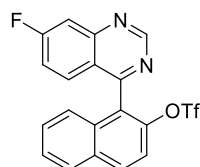

From 4-chloro-7-fluoroquinazoline (10 mmol, 1.82 g), following the General procedure I described above, compound **1c** (4.0 mmol, 1.7 g) was obtained in 40% yield as a yellow solid; <sup>1</sup>H NMR (500 MHz, Chloroform-*d*) δ 9.55 (s, 1H), 8.19-8.17 (m, 1H), 8.05 (d, *J* = 8.5 Hz, 1H), 7.88-7.81 (m, 1H), 7.68-7.60 (m, 2H), 7.56-7.45 (m, 2H), 7.36-7.24 (m, 2H) ppm. <sup>19</sup>F NMR (471 MHz, Chloroform-*d*) δ -74.27, -100.08 ppm. <sup>13</sup>C NMR (125 MHz, Chloroform-*d*) δ 167.0, 165.0, 163.2, 155.9, 152.5, 152.4, 144.6, 132.5, 132.5, 132.3, 129.6, 129.5, 128.6, 127.7, 126.7, 125.8, 122.4, 122.0, 119.6, 119.5,

119.4, 119.2, 116.9, 114.4, 113.0, 112.9 ppm. **HRMS** (ESI)  $m/z$  calculated for  $C_{19}H_{10}F_4N_2O_3SNa^+$   $[M+Na]^+$ : 445.0246, found 445.0241.

**1-(7-chloroquinazolin-4-yl) naphthalen-2-yl trifluoromethanesulfonate (1d).**

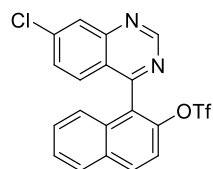

From 4,7-dichloroquinazoline (10 mmol, 1.97 g), following the General procedure I described above, compound **1d** (4.3 mmol, 1.1 g) was obtained in 53% yield as a yellow solid;  **$^1H$  NMR (500 MHz, Chloroform-*d*)**  $\delta$  9.55 (s, 1H), 8.21 (d,  $J$  = 1.5 Hz, 1H), 8.16 (d,  $J$  = 9.0 Hz, 1H), 8.05-8.00 (m, 1H), 7.68-7.55 (m, 2H), 7.51-7.43 (m, 2H), 7.42-7.38 (m, 1H), 7.27-7.21 (m, 1H) ppm.  **$^{19}F$  NMR (471 MHz, Chloroform-*d*)**  $\delta$  -74.23 ppm.  **$^{13}C$  NMR (125 MHz, Chloroform-*d*)**  $\delta$  163.4, 155.9, 151.3, 144.7, 141.1, 132.6, 132.5, 132.3, 129.8, 128.7, 128.2, 128.0, 127.7, 126.6, 125.9, 123.5, 122.0, 119.6, 119.5, 117.0, 114.4 ppm. **HRMS** (ESI)  $m/z$  calculated for  $C_{19}H_{10}F_3N_2O_3SClNa^+$   $[M+Na]^+$ : 460.9950, found 460.9941.

**1-(7-chloroquinazolin-4-yl) naphthalen-2-yl trifluoromethanesulfonate (1e).**

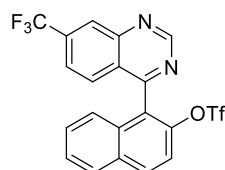

From 4-chloro-7-(trifluoromethyl) quinazoline (3 mmol, 0.50 g), following the General procedure I described above, compound **1e** (1.2 mmol, 0.5 g) was obtained in 47% yield as a yellow oil;  **$^1H$  NMR (500 MHz, Chloroform-*d*)**  $\delta$  9.67 (s, 1H), 8.54 (s, 1H), 8.16 (d,  $J$  = 9.0 Hz, 1H), 8.02 (d,  $J$  = 8.5 Hz, 1H), 7.70-7.68 (m, 1H), 7.64-7.58 (m, 3H), 7.47-7.44 (m, 1H), 7.24 (d,  $J$  = 8.5 Hz, 1H) ppm.  **$^{19}F$  NMR (471 MHz, Chloroform-*d*)**  $\delta$  -64.37, -74.37 ppm.  **$^{13}C$  NMR (125 MHz, Chloroform-*d*)**  $\delta$  164.0, 156.0, 150.2, 144.7, 135.9 (q,  $J$  = 33.4 Hz), 132.7, 132.5, 132.2, 128.7, 128.7, 128.1, 127.7, 127.2 (q,  $J$  = 4.3 Hz), 126.3, 126.2, 125.7, 124.3, 124.1 (q,  $J$  = 3.0 Hz), 122.2, 116.9, 119.5, 114.4 ppm. **HRMS** (ESI)  $m/z$  calculated for  $C_{20}H_{21}F_6N_2O_3S^+$   $[M+H]^+$ : 473.0389, found 473.0388.

**1-(6-fluoroquinazolin-4-yl) naphthalen-2-yl trifluoromethanesulfonate (1f).**

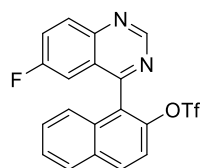

From 4-chloro-6-fluoroquinazoline (10 mmol, 1.82 g), following the General procedure I described above, compound **1f** (5.6 mmol, 2.4 g) was obtained in 56% yield as a yellow solid;  **$^1H$  NMR (500 MHz, Chloroform-*d*)**  $\delta$  9.55 (s, 1H), 8.26-8.23 (m, 1H), 8.18 (d,  $J$  = 9.0 Hz, 1H), 8.04 (d,  $J$  = 8.0 Hz, 1H), 7.78-7.70 (m, 1H), 7.66-7.58 (m, 2H), 7.51-7.44 (m, 1H), 7.28-7.25 (m, 1H), 7.07-7.02 (m, 1H) ppm.  **$^{19}F$**

**NMR (471 MHz, Chloroform-*d*)**  $\delta$  -74.24, -107.90 ppm. **<sup>13</sup>C NMR (125 MHz, Chloroform-*d*)**  $\delta$  163.0, 162.9, 162.0, 159.9, 154.5, 154.5, 148.0, 144.7, 132.6, 132.5, 132.1, 132.1, 132.0, 128.7, 128.7, 127.7, 126.5, 125.8, 125.7, 125.4, 125.2, 122.0, 119.6, 119.5, 117.0, 114.4, 109.9, 109.7 ppm. **HRMS (ESI)** *m/z* calculated for C<sub>19</sub>H<sub>10</sub>F<sub>4</sub>N<sub>2</sub>O<sub>3</sub>SNa<sup>+</sup> [M+Na]<sup>+</sup>: 445.0246, found 445.0241.

**1-(6-chloroquinazolin-4-yl)naphthalen-2-yl trifluoromethanesulfonate(1g).**

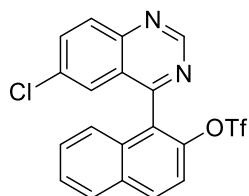

From 4,6-dichloroquinazoline (10 mmol, 1.97 g), following the General procedure I described above, compound **1g** (5.5 mmol, 2.4 g) was obtained in 55% yield as a yellow solid; **<sup>1</sup>H NMR (500 MHz, Chloroform-*d*)**  $\delta$  9.56 (s, 1H), 8.21-8.12 (m, 2H), 8.04 (d, *J* = 8.5 Hz, 1H), 7.93-7.85 (m, 1H), 7.67-7.58 (m, 2H), 7.52-7.45 (m, 1H), 7.44-7.40 (m, 1H), 7.28-7.23 (m, 1H) ppm. **<sup>19</sup>F NMR (471 MHz, Chloroform-*d*)**  $\delta$  -74.19 ppm. **<sup>13</sup>C NMR (125 MHz, Chloroform-*d*)**  $\delta$  162.1, 155.1, 149.3, 144.7, 135.8, 134.4, 132.7, 132.6, 132.2, 131.0, 128.7, 128.7, 127.8, 126.3, 125.8, 125.6, 125.1, 122.1, 119.6, 119.5, 117.0, 114.4 ppm. **HRMS (ESI)** *m/z* calculated for C<sub>19</sub>H<sub>10</sub>F<sub>3</sub>N<sub>2</sub>O<sub>3</sub>SClNa<sup>+</sup> [M+Na]<sup>+</sup>: 460.9950, found 460.9949.

**1-(8-methylquinazolin-4-yl)naphthalen-2-yl trifluoromethanesulfonate (1h).**

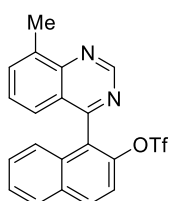

From 4-chloro-8-methylquinazoline (3 mmol, 0.50 g), following the General procedure I described above, compound **1h** (1.7 mmol, 0.7 g) was obtained in 58% yield as a yellow solid; **<sup>1</sup>H NMR (500 MHz, Chloroform-*d*)**  $\delta$  9.56 (s, 1H), 8.13 (d, *J* = 9.0 Hz, 1H), 8.00 (d, *J* = 8.0 Hz, 1H), 7.79-7.78 (m, 1H), 7.62-7.57 (m, 2H), 7.44-7.38 (m, 2H), 7.29-7.23 (m, 2H), 2.89 (s, 3H) ppm. **<sup>19</sup>F NMR (471 MHz, Chloroform-*d*)**  $\delta$  -74.28 ppm. **<sup>13</sup>C NMR (125 MHz, Chloroform-*d*)**  $\delta$  163.4, 154.0, 149.9, 144.7, 137.5, 134.6, 132.5, 132.1, 129.2 (d, *J* = 11.0 Hz), 128.5, 128.4, 128.1, 127.5, 127.4, 126.1, 125.0, 124.3, 119.5, 117.0, 17.6 ppm. **HRMS (ESI)** *m/z* calculated for C<sub>20</sub>H<sub>14</sub>F<sub>3</sub>N<sub>2</sub>O<sub>3</sub>S<sup>+</sup> [M+H]<sup>+</sup>: 419.0672, found 419.0676.

**1-(2-methylquinazolin-4-yl)naphthalen-2-yl trifluoromethanesulfonate (1i)<sup>[1]</sup>.**

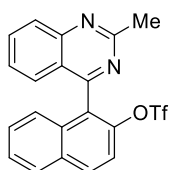

From 4-chloro-2-methylquinazoline (3 mmol, 0.53 g), following the General procedure I described above, compound **1i** (1.7 mmol, 0.71 g) was obtained in 58% yield as a yellow solid; **<sup>1</sup>H NMR (500 MHz, Chloroform-*d*)**  $\delta$  8.14-8.10 (m, 2H), 8.02-8.00 (m, 1H), 7.92-7.89 (m, 1H), 7.61-7.58 (m, 2H), 7.46-7.42 (m, 2H), 7.40-

7.38 (m, 1H), 7.28-7.26 (m, 1H), 3.01 (s, 3H) ppm. **<sup>19</sup>F NMR (471 MHz, Chloroform-*d*)**  $\delta$  -74.39 ppm.

**1-(5-methyl-6-(thiophen-3-yl) pyrimidin-4-yl)naphthalen-2-yl trifluoromethanesulfonate (1n).**

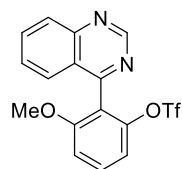

From 4-chloroquinazoline (3 mmol, 0.50 g), following the General procedure I described above, compound **1n** (1.7 mmol, 0.6 g) was obtained in 57% yield as a yellow solid; **<sup>1</sup>H NMR (500 MHz, Chloroform-*d*)**  $\delta$  9.47 (s, 1H), 8.12 (d, *J* = 8.5 Hz, 1H), 7.92-7.88 (m, 1H), 7.64-7.55 (m, 3H), 7.15-7.09 (m, 2H), 3.69 (s, 3H) ppm. **<sup>19</sup>F NMR (471 MHz, Chloroform-*d*)**  $\delta$  -74.44 ppm. **<sup>13</sup>C NMR (125 MHz, Chloroform-*d*)**  $\delta$  161.9, 158.5, 154.6, 150.4, 147.6, 134.1, 131.7, 128.7, 127.9, 126.5, 124.7, 121.9, 119.9, 119.3, 116.8, 114.2, 113.9, 111.0, 56.2 ppm. **HRMS (ESI)** *m/z* calculated for C<sub>16</sub>H<sub>11</sub>F<sub>3</sub>N<sub>2</sub>O<sub>4</sub>S<sup>+</sup> [*M*+*H*]<sup>+</sup>: 385.0464, found 385.0464.

**2-(quinazolin-4-yl)phenyl trifluoromethanesulfonate (1o).**

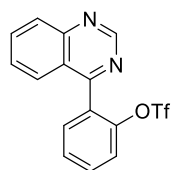

From 4-chloroquinazoline (3 mmol, 0.50 g), following the General procedure I described above, compound **1o** (1.5 mmol, 0.5 g) was obtained in 50% yield as a yellow solid; **<sup>1</sup>H NMR (500 MHz, Chloroform-*d*)**  $\delta$  9.44 (s, 1H), 8.15 (d, *J* = 8.5 Hz, 1H), 7.96-7.93 (m, 1H), 7.76 (d, *J* = 8.5 Hz, 1H), 7.68-7.52 (m, 5H) ppm. **<sup>19</sup>F NMR (471 MHz, Chloroform-*d*)**  $\delta$  -74.14 ppm. **<sup>13</sup>C NMR (125 MHz, Chloroform-*d*)**  $\delta$  163.8, 154.6, 151.0, 147.0, 134.4, 132.4, 131.8, 130.8, 129.1, 128.6, 128.4, 126.4, 123.7, 122.6, 122.1, 119.5, 117.0, 114.4 ppm. **HRMS (ESI)** *m/z* calculated for C<sub>15</sub>H<sub>9</sub>F<sub>3</sub>N<sub>2</sub>O<sub>3</sub>S<sup>+</sup> [*M*+*H*]<sup>+</sup>: 355.0359, found 355.0362.

**1-(5-methylpyrimidin-4-yl)naphthalen-2-yl trifluoromethanesulfonate (1p).**

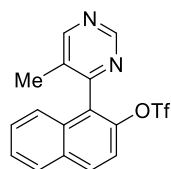

From 4-chloro-5-methylpyrimidine (3 mmol, 0.40 g), following the General procedure I described above, compound **1p** (1.7 mmol, 0.6 g) was obtained in 55% yield as a yellow solid; **<sup>1</sup>H NMR (500 MHz, Chloroform-*d*)**  $\delta$  9.17 (s, 1H), 8.69 (s, 1H), 7.95-7.85 (m, 2H), 7.50-7.40 (m, 3H), 7.24-7.22 (m, 1H), 1.98 (s, 3H). **<sup>19</sup>F NMR (471 MHz, Chloroform-*d*)**  $\delta$  -74.27. **<sup>13</sup>C NMR (126 MHz, Chloroform-*d*)**  $\delta$  160.2, 158.6, 156.7, 143.9, 132.5, 131.9, 131.8, 131.3, 128.7, 128.5, 127.7, 127.5, 125.3, 122.1, 119.6, 119.4,

117.0, 114.5, 15.6. **HRMS** (ESI)  $m/z$  calculated for  $C_{16}H_{11}F_3N_2O_3S^+$   $[M+H]^+$ : 369.0515, found 369.0517.

**1-(5-methyl-6-phenylpyrimidin-4-yl)naphthalen-2-yl trifluoromethanesulfonate (1q).**

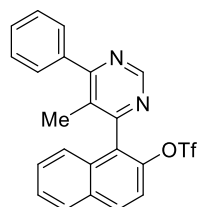

From 4-chloro-5-methyl-6-phenylpyrimidine (3 mmol, 0.60 g), following the General procedure I described above, compound **1q** (1.7 mmol, 0.7 g) was obtained in 56% yield as a yellow solid;  **$^1H$  NMR (500 MHz, Chloroform-*d*)**  $\delta$  9.33 (s, 1H), 8.06 (d,  $J$ =9.0 Hz, 1H), 7.98 (d,  $J$ =7.8 Hz, 1H), 7.70-7.67 (m, 2H), 7.63-7.48 (m, 7H), 2.12 (s, 3H).  **$^{19}F$  NMR (471 MHz, Chloroform-*d*)**  $\delta$  -74.26.  **$^{13}C$  NMR (126 MHz, Chloroform-*d*)**  $\delta$  167.2, 161.4, 156.3, 144.0, 138.1, 132.6, 131.8, 131.5, 129.6, 129.2, 129.1, 128.7, 128.7, 128.6, 128.5, 127.5, 125.6, 122.2, 119.7, 119.6, 117.1, 114.6, 16.3. **HRMS** (ESI)  $m/z$  calculated for  $C_{22}H_{15}F_3N_2O_3S^+$   $[M+H]^+$ : 445.0828, found 445.0827.

**1-(5-methyl-6-(thiophen-3-yl) pyrimidin-4-yl)naphthalen-2-yl trifluoromethanesulfonate (1r).**

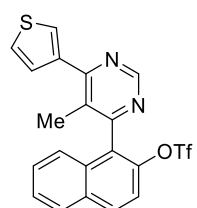

From 4-chloro-5-methyl-6-(thiophen-3-yl) pyrimidine (3 mmol, 0.60 g), following the General procedure I described above, compound **1r** (0.6 mmol, 0.3 g) was obtained in 21% yield as a yellow solid;  **$^1H$  NMR (500 MHz, Chloroform-*d*)**  $\delta$  9.17 (s, 1H), 8.69 (s, 1H), 7.95-7.85 (m, 2H), 7.50-7.40 (m, 3H), 7.24-7.22 (m, 1H), 1.98 (s, 3H).  **$^{19}F$  NMR (471 MHz, Chloroform-*d*)**  $\delta$  -74.27.  **$^{13}C$  NMR (126 MHz, Chloroform-*d*)**  $\delta$  160.2, 158.6, 156.7, 143.9, 132.5, 131.9, 131.8, 131.3, 128.7, 128.5, 127.7, 127.5, 125.3, 122.1, 119.6, 119.4, 117.0, 114.5, 15.6. **HRMS** (ESI)  $m/z$  calculated for  $C_{20}H_{14}F_3N_2O_3S_2^+$   $[M+H]^+$ : 451.0392, found 451.0394.

**General procedure II to synthesize heterobiaryl triflates <sup>[1,3]</sup>.**

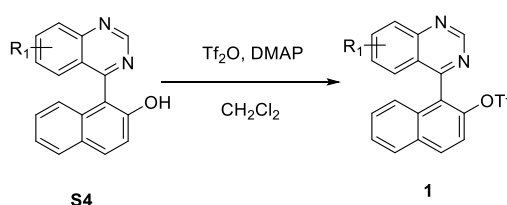

To a solution of **S4** and DMAP (2.0 equiv.) in  $CH_2Cl_2$  was added  $Tf_2O$  (1.2 equiv.) dropwise at 0 °C. The reaction mixture was stirred at 25 °C until **S4** was fully consumed as monitored by TLC analysis. The reaction mixture was diluted with  $CH_2Cl_2$  and  $Na_2CO_3$  aq. The aqueous phase was extracted with  $CH_2Cl_2$ . The combined organic phase was washed with brine, dried over  $MgSO_4$  and

concentrated *in vacuo*. The residue was purified by flash column chromatography (1:20 EtOAc: hexanes) on silica gel to give the corresponding triflate substrates.

**7-methoxy-1-(quinazolin-4-yl)naphthalen-2-yl trifluoromethanesulfonate (1j).**

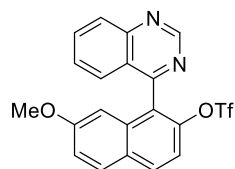

From 7-methoxy-1-(quinazolin-4-yl)naphthalen-2-ol (2 mmol, 0.60 g), following the General procedure II described above, compound **1j** (1.6 mmol, 0.7 g) was obtained in 79% yield as a yellow solid; <sup>1</sup>H NMR (500 MHz, Chloroform-*d*) δ 9.57 (s, 1H), 8.22-8.20 (m, 1H), 8.04 (d, *J* = 9.0 Hz, 1H), 7.97-7.94 (m, 1H), 7.89 (d, *J* = 9.0 Hz, 1H), 7.56-7.50 (m, 2H), 7.46 (d, *J* = 9.0 Hz, 1H), 7.25-7.22 (m, 1H), 6.51-6.50 (m, 1H), 3.54 (s, 3H) ppm. <sup>19</sup>F NMR (471 MHz, Chloroform-*d*) δ -74.36. <sup>13</sup>C NMR (125 MHz, Chloroform-*d*) δ 163.6, 159.6, 155.1, 150.8, 145.5, 134.7, 133.9, 131.9, 130.1, 129.2, 128.5, 128.1, 126.6, 125.5, 124.9, 122.0, 120.3, 119.5, 117.0, 114.4, 104.4, 55.4 ppm. HRMS (ESI) *m/z* calculated for C<sub>20</sub>H<sub>14</sub>F<sub>3</sub>N<sub>2</sub>O<sub>4</sub>S<sup>+</sup> [M+H]<sup>+</sup>: 435.0621, found 435.0623.

**6-cyano-1-(quinazolin-4-yl)naphthalen-2-yl trifluoromethanesulfonate (1k).**

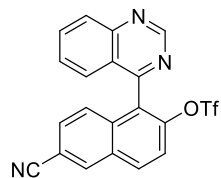

From 6-hydroxy-5-(quinazolin-4-yl)-2-naphthonitrile (2 mmol, 0.60 g), following the General procedure II described above, compound **1k** (1.0 mmol, 0.42 g) was obtained in 48% yield as a yellow solid; <sup>1</sup>H NMR (500 MHz, Chloroform-*d*) δ 9.56 (s, 1H), 8.41 (s, 1H), 8.24-8.23 (m, 2H), 8.01-7.98 (m, 1H), 7.76 (d, *J* = 9.0 Hz, 1H), 7.59-7.55 (m, 2H), 7.41-7.39 (m, 2H) ppm. <sup>19</sup>F NMR (471 MHz, Chloroform-*d*) δ -74.10 ppm. <sup>13</sup>C NMR (125 MHz, Chloroform-*d*) δ 162.0, 154.9, 150.9, 146.7, 135.0, 134.4, 133.9, 132.8, 131.4, 129.4, 128.9, 127.6, 127.6, 125.9, 124.8, 121.7, 119.4, 118.2, 116.9, 111.5 ppm. HRMS (ESI) *m/z* calculated for C<sub>20</sub>H<sub>11</sub>F<sub>3</sub>N<sub>3</sub>O<sub>3</sub>S<sup>+</sup> [M+H]<sup>+</sup>: 430.0468, found 430.0465.

**6-methoxy-1-(quinazolin-4-yl)naphthalen-2-yl trifluoromethanesulfonate (1m).**

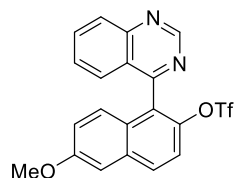

From 6-methoxy-1-(quinazolin-4-yl)naphthalen-2-ol (3 mmol, 0.90 g), following the General procedure II described above, compound **1k** (2.0 mmol, 0.9 g) was obtained in 69% yield as a yellow solid; <sup>1</sup>H NMR (500 MHz, Chloroform-*d*) δ 9.55 (s, 1H), 8.21-8.19 (m, 1H), 8.02-7.93 (m, 2H), 7.55-7.46 (m, 3H), 7.28-7.26 (m, 1H), 7.17-7.15 (m, 1H), 7.11-7.09 (m, 1H), 3.95 (s, 3H) ppm. <sup>19</sup>F NMR (471 MHz, Chloroform-*d*) δ -74.34. <sup>13</sup>C NMR (125 MHz, Chloroform-*d*) δ 163.4, 158.7,



154.8, 150.6, 143.0, 134.5, 134.0, 130.6, 129.0, 128.4, 127.5, 127.4, 126.8, 126.5, 124.9, 121.3, 119.9, 119.4, 106.3, 55.5 ppm. **HRMS** (ESI)  $m/z$  calculated for  $C_{20}H_{14}F_3N_2O_4S^+[M+H]^+$ : 435.0621, found 435.0623.

**Methyl 5-(quinazolin-4-yl)-6-(((trifluoromethyl)sulfonyl)oxy)-2-naphthoate (11).**

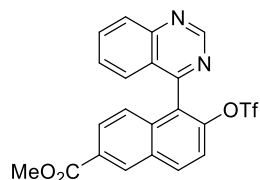

From methyl 6-hydroxy-5-(quinazolin-4-yl)-2-naphthoate (2 mmol, 0.66 g), following the General procedure II described above, compound **11** (1.6 mmol, 0.7 g) was obtained in 79% yield as a yellow solid; **<sup>1</sup>H NMR (500 MHz, Chloroform-*d*)**  $\delta$  9.56 (s, 1H), 8.76 (s, 1H), 8.27 (d,  $J$  = 9.0 Hz, 1H), 8.22 (d,  $J$  = 8.5 Hz, 1H), 8.02-7.95 (m, 2H), 7.69 (d,  $J$  = 9.0 Hz, 1H), 7.55-7.52 (m, 1H), 7.42 (d,  $J$  = 8.5 Hz, 1H), 7.33 (d,  $J$  = 9.0 Hz, 1H), 3.98 (s, 3H) ppm. **<sup>19</sup>F NMR (471 MHz, Chloroform-*d*)**  $\delta$  -74.21 ppm. **<sup>13</sup>C NMR (125 MHz, Chloroform-*d*)**  $\delta$  166.4, 162.7, 155.0, 150.8, 146.2, 134.8, 134.6, 133.6, 131.7, 131.3, 129.3, 129.2, 128.7, 127.8, 127.2, 126.5, 126.3, 124.9, 122.0, 120.5, 119.5, 116.9, 114.4, 52.7 ppm. **HRMS** (ESI)  $m/z$  calculated for  $C_{21}H_{13}F_3N_2O_5S^+[M+H]^+$ : 463.0570, found 463.0567.

## 2. Pd-catalyzed asymmetric aminocarbonylation and dearomative aza-addition.

### 2.1. General procedure for screening of reaction conditions

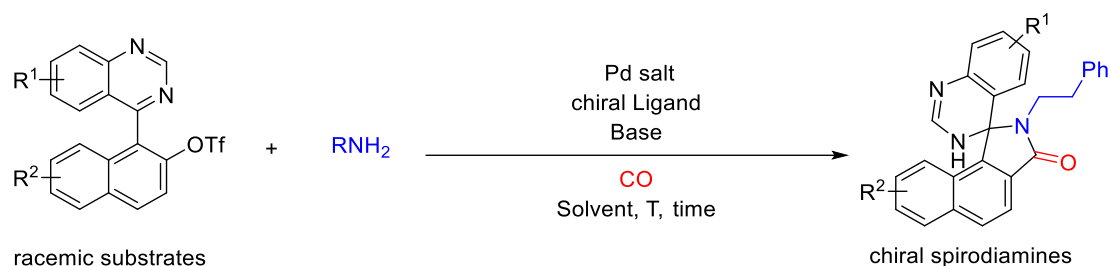

In a glovebox, to a 4 mL screw-cap vial equipped with an oven-dried stirring bar were added the palladium salt (7.5 mol% in terms of Pd atom), ligand (0.012 mmol 12.0 mol%), heterobiaryl triflate (0.1 mmol, 1.0 equiv.), amine (0.3 mmol, 3.0 equiv.), base (0.3 mmol, 3.0 equiv.), and solvent (0.5 mL) was added via a syringe. The vial was closed by PTFE/white rubber septum (13 mm Septa) and phenolic cap and connected with atmosphere with a needle. Next, the vial was fixed in an alloy plate and put into Parr 4760 series autoclave (300 mL) under nitrogen atmosphere. At room temperature, the autoclave is flushed with carbon monoxide for three times and carbon monoxide was charged to specific pressure. The reaction was heated under specific temperature for 18 hours. Afterwards, the autoclave was cooled to room temperature and the pressure was carefully released. The reaction mixture was concentrated and purified by column chromatography on silica gel (eluent: petroleum ether/ethyl acetate = 3/1) to afford the desired products.

## 2.1.1 Optimization of reaction conditions involving alkylamines

**Table S1.** Ligand screening. <sup>[a]</sup>

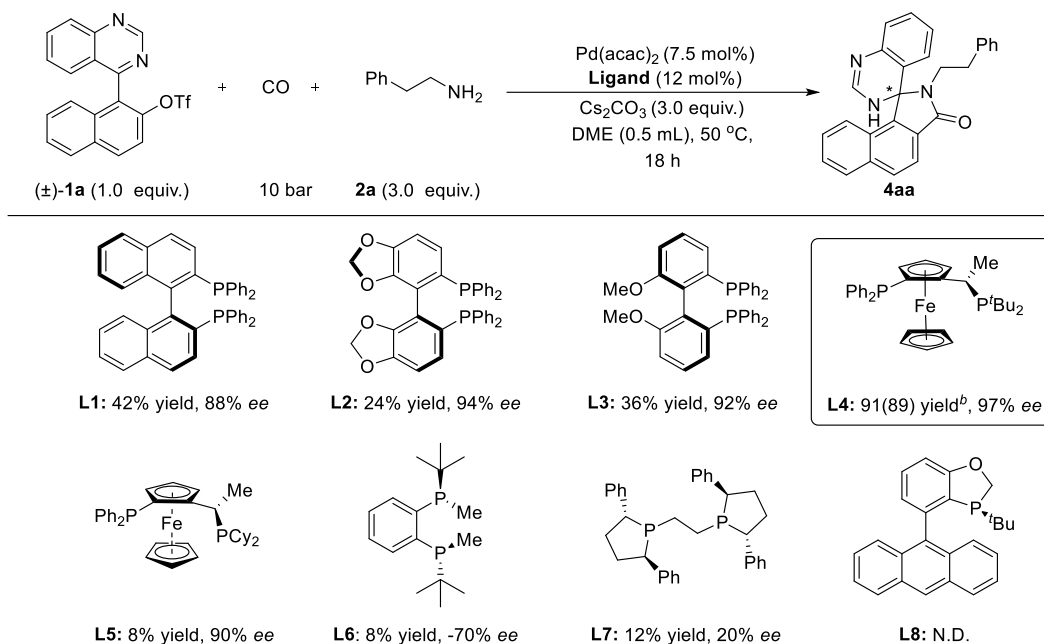

<sup>a</sup> Reaction conditions: **1a** (0.1 mmol, 1.0 equiv.), **2a** (0.3 mmol, 3.0 equiv.) and CO (10 bar), Pd(acac)<sub>2</sub> (7.5 mol%), **Ligand** (12 mol%), and Cs<sub>2</sub>CO<sub>3</sub> (0.3 mmol, 3.0 equiv.) in 0.5 mL DME at 50 °C for 18 hours. The yields were determined by NMR using dibromomethane as the internal standard. The ee value was determined by HPLC using a chiral column. <sup>b</sup> Isolated yield.

**Table S2.** Solvent screening. <sup>[a]</sup>

| Entry | Solvent | Yield of <b>4aa</b> (%) | ee of <b>4aa</b> (%) |
|-------|---------|-------------------------|----------------------|
| 1     | Toluene | 98                      | 80                   |
| 2     | DCM     | 98                      | 86                   |
| 3     | Hexane  | 98                      | 62                   |
| 4     | MeCN    | 32                      | 97                   |
| 5     | DMAc    | 14                      | 95                   |
| 6     | EA      | 81                      | 94                   |
| 7     | DME     | 91(89) <sup>b</sup>     | 97                   |

<sup>a</sup> Reaction conditions: **1a** (0.1 mmol, 1.0 equiv.), **2a** (0.3 mmol, 3.0 equiv.) and CO (10 bar), Pd(acac)<sub>2</sub> (7.5 mol%), (*R*, *S<sub>FC</sub>*)-**L4** (12 mol%), and Cs<sub>2</sub>CO<sub>3</sub> (0.3 mmol, 3.0 equiv.) in 0.5 mL Solvent at 50 °C for 18 hours. The yields were determined by NMR using dibromomethane as the internal standard. The ee value was determined by HPLC using a chiral column. <sup>b</sup> Isolated yield.

**Table S3.** Base screening.<sup>[a]</sup>

| Entry    | Base                                | Yield of <b>4aa</b> (%)   | <i>ee</i> of <b>4aa</b> (%) |
|----------|-------------------------------------|---------------------------|-----------------------------|
| <b>1</b> | <b>Cs<sub>2</sub>CO<sub>3</sub></b> | <b>91(89)<sup>b</sup></b> | <b>97</b>                   |
| 2        | K <sub>2</sub> CO <sub>3</sub>      | 77                        | 62                          |
| 3        | K <sub>3</sub> PO <sub>4</sub>      | 99                        | 82                          |
| 4        | Na <sub>2</sub> CO <sub>3</sub>     | 75                        | 64                          |
| 5        | NaO <sup>t</sup> Bu                 | N.D.                      | -                           |
| 6        | NEt <sub>3</sub>                    | 71                        | 60                          |
| 7        | DABCO                               | 89                        | 56                          |

<sup>a</sup> Reaction conditions: **1a** (0.1 mmol, 1.0 equiv.), **2a** (0.3 mmol, 3.0 equiv.) and CO (10 bar), Pd(acac)<sub>2</sub> (7.5 mol%), (*R, S<sub>FC</sub>*)-**L4** (12 mol%), and Base (0.3 mmol, 3.0 equiv.) in 0.5 mL DME at 50 °C for 18 hours. The yields were determined by NMR using dibromomethane as the internal standard. The *ee* value was determined by HPLC using a chiral column. <sup>b</sup> Isolated yield.

**Table S4.** Pd and Ligand loading screening.<sup>[a]</sup>

| Entry    | Variation              | Yield of <b>4aa</b> (%)   | <i>ee</i> of <b>4aa</b> (%) |
|----------|------------------------|---------------------------|-----------------------------|
| <b>1</b> | <b>X = 7.5, Y = 12</b> | <b>91(89)<sup>b</sup></b> | <b>97</b>                   |
| 2        | X = 5, Y = 10          | 51                        | 96                          |

<sup>a</sup> Reaction conditions: **1a** (0.1 mmol, 1.0 equiv.), **2a** (0.3 mmol, 3.0 equiv.) and CO (10 bar), Pd(acac)<sub>2</sub> (Xmol%), (*R, S<sub>FC</sub>*)-**L4** (Y mol%), and Cs<sub>2</sub>CO<sub>3</sub> (0.3 mmol, 3.0 equiv.) in 0.5 mL DME at 50 °C for 18 hours. The yields were determined by NMR using dibromomethane as the internal standard. The *ee* value was determined by HPLC using a chiral column. <sup>b</sup> Isolated yield.

**Table S5.** CO pressure screening. <sup>[a]</sup>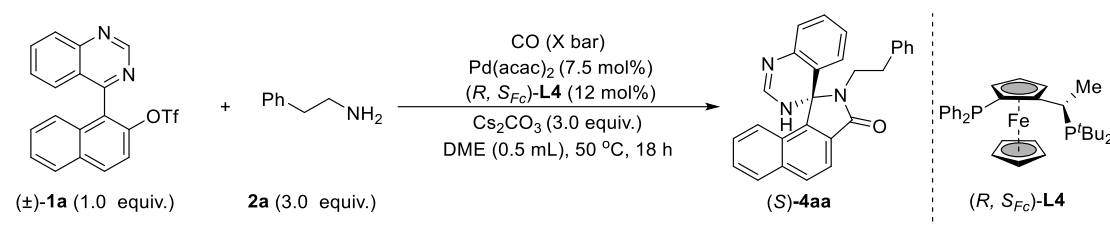

| Entry    | X (bar)       | Yield of <b>4aa</b> (%)   | <i>ee</i> of <b>4aa</b> (%) |
|----------|---------------|---------------------------|-----------------------------|
| 1        | X = 5         | 75                        | 97                          |
| <b>2</b> | <b>X = 10</b> | <b>91(89)<sup>b</sup></b> | <b>97</b>                   |
| 3        | X = 20        | 46                        | 97                          |

<sup>a</sup> Reaction conditions: **1a** (0.1 mmol, 1.0 equiv.), **2a** (0.3 mmol, 3.0 equiv.) and CO (X bar), Pd(acac)<sub>2</sub> (7.5 mol%), (R, S<sub>FC</sub>)-**L1** (12 mol%), and Cs<sub>2</sub>CO<sub>3</sub> (0.3 mmol, 3.0 equiv.) in 0.5 mL DME at 50 °C for 18 hours. The yields were determined by NMR using dibromomethane as the internal standard. The *ee* value was determined by HPLC using a chiral column. <sup>b</sup> Isolated yield.

### 2.1.2 Optimization of reaction conditions involving arylamines

**Table S6.** Ligand screening. <sup>[a]</sup>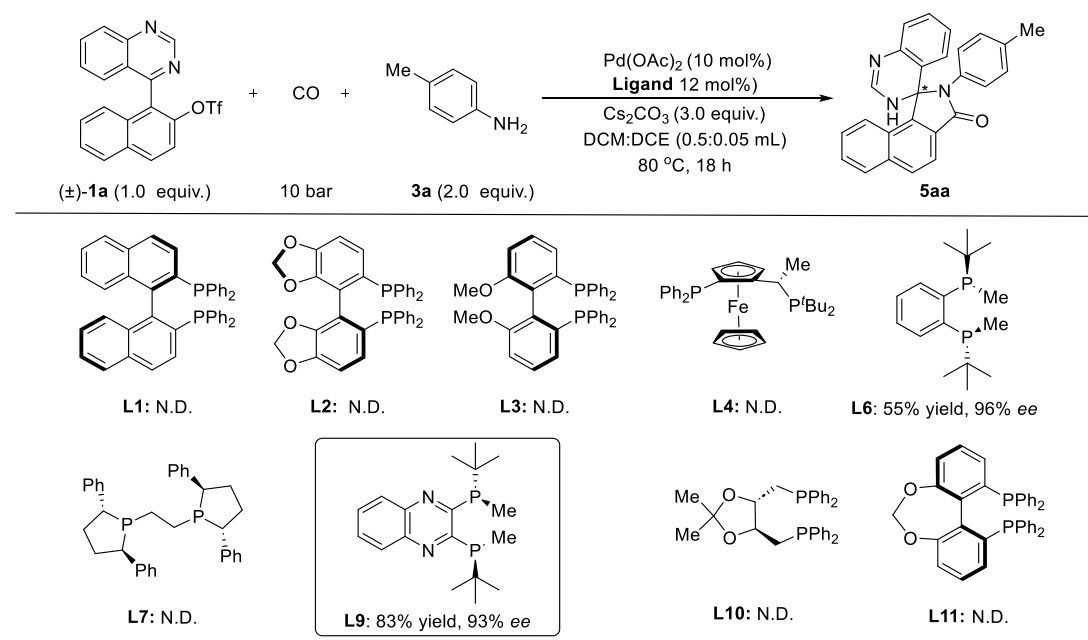

<sup>a</sup>Reaction conditions: **1a** (0.1 mmol, 1.0 equiv.), **3a** (0.2 mmol, 2.0 equiv) and CO (10 bar), Pd(OAc)<sub>2</sub> (12 mol%), **Ligand** (12 mol%), and Cs<sub>2</sub>CO<sub>3</sub> (0.3 mmol, 3.0 equiv) in 0.5 mL DCM and 0.05 mL DCE at 80 °C for 18 hours. The yields were isolated yield. *Ee* of **5aa** was determined by chiral-phase HPLC analysis.

**Table S7.** Solvent screening.<sup>[a]</sup>

| Entry    | Solvent                   | Yield of <b>5aa</b> (%) | ee of <b>5aa</b> (%) |
|----------|---------------------------|-------------------------|----------------------|
| <b>1</b> | <b>DCM:DCE = 0.5:0.05</b> | <b>83</b>               | <b>93</b>            |
| 2        | DCM                       | 84                      | 85                   |
| 3        | DCE                       | 55                      | 90                   |
| 4        | Toluene                   | 12                      | 56                   |
| 5        | THF                       | 21                      | 70                   |
| 6        | MeCN                      | 51                      | 90                   |
| 7        | EA                        | 29                      | 88                   |

<sup>a</sup> Reaction conditions: **1a** (0.1 mmol, 1.0 equiv), **3a** (0.2 mmol, 2.0 equiv) and CO (10 bar), Pd(OAc)<sub>2</sub> (12 mol%), (*R,R*)-**L9** (12 mol%), and Cs<sub>2</sub>CO<sub>3</sub> (0.3 mmol, 3.0 equiv) in 0.5 mL Solvent at 80 °C for 18 hours. The yields were isolated yield. Ee of **5aa** was determined by chiral-phase HPLC analysis.

**Table S8.** Base screening.<sup>[a]</sup>

| Entry    | Base                                | Yield of <b>5aa</b> (%) | ee of <b>5aa</b> (%) |
|----------|-------------------------------------|-------------------------|----------------------|
| <b>1</b> | <b>Cs<sub>2</sub>CO<sub>3</sub></b> | <b>83</b>               | <b>93</b>            |
| 2        | LiO <sup>t</sup> Bu                 | 74                      | 94                   |
| 3        | CsF                                 | 46                      | 92                   |
| 4        | K <sub>3</sub> PO <sub>4</sub>      | 21                      | 60                   |
| 5        | Na <sub>2</sub> CO <sub>3</sub>     | 17                      | 86                   |
| 6        | K <sub>2</sub> CO <sub>3</sub>      | 31                      | 66                   |
| 7        | NEt <sub>3</sub>                    | 20                      | 85                   |
| 8        | DABCO                               | trace                   | -                    |

<sup>a</sup> Reaction conditions: **1a** (0.1 mmol, 1.0 equiv), **3a** (0.2 mmol, 2.0 equiv) and CO (10 bar), Pd(OAc)<sub>2</sub> (12 mol%), (*R,R*)-**L9** (12 mol%), and Base (0.3 mmol, 3.0 equiv) in 0.5 mL DCM and 0.05 mL DCE at 80 °C for 18 hours. The yields were isolated yield. Ee of **5aa** was determined by chiral-phase HPLC analysis.

## 2.2 Characterization data of products.

### (S)-2-Phenethyl-3'H-spiro[benzo[e]isoindole-1,4'-quinazolin]-3(2H)-one (4aa).

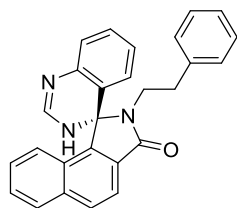

Yellow oil, 89% (35.9 mg) isolated yield,  $[\alpha]_D^{25} = +112.03$  ( $c = 1.0$  in  $\text{CHCl}_3$ ); 97% *ee*, determined by HPLC analysis (Chiralpak IA-3 column, *n*-hexane/*i*-PrOH = 90:10 (v/v), flow rate 0.7 mL/min,  $\lambda = 254$  nm, 25 °C),  $t_R$  (minor) = 36.14 min;  $t_R$  (major) = 38.43 min;  **$^1\text{H}$  NMR (500 MHz, Chloroform-*d*)**  $\delta$  7.94-7.84 (m, 2H), 7.67 (d,  $J = 8.0$  Hz, 1H), 7.54-7.46 (m, 2H), 7.41-7.35 (m, 1H), 7.30-7.12 (m, 6H), 7.07-7.02 (m, 2H), 6.88-6.81 (m, 1H), 6.48-6.44 (m, 1H), 3.59-3.50 (m, 1H), 3.41-3.30 (m, 1H), 3.03-2.92 (m, 1H), 2.55-2.44 (m, 1H) ppm.  **$^{13}\text{C}$  NMR (125 MHz, Chloroform-*d*)**  $\delta$  166.9, 146.2, 145.4, 139.4, 136.3, 131.4, 130.2, 129.4, 129.1, 128.6, 128.4, 127.8, 127.8, 127.0, 126.5, 125.9, 125.9, 123.7, 120.5, 118.8, 75.8, 42.2, 34.7 ppm. **HRMS** (ESI)  $m/z$  calculated for  $\text{C}_{27}\text{H}_{22}\text{N}_3\text{O}^+ \text{M} + \text{H}^+$ : 404.1757, found 404.1757.

### (S)-2-(3-Fluorobenzyl)-3'H-spiro[benzo[e]isoindole-1,4'-quinazolin]-3(2H)-one (4ab).

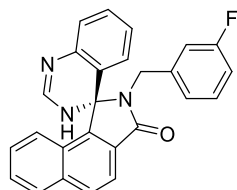

Yellow oil, 76% (31.0 mg) isolated yield,  $[\alpha]_D^{20} = +29.90$  ( $c = 1.0$  in  $\text{CHCl}_3$ ); 95% *ee*, determined by HPLC analysis (Chiralpak IC-3 column, *n*-hexane/*i*-PrOH = 60:40 (v/v), flow rate 0.8 mL/min,  $\lambda = 254$  nm, 25 °C),  $t_R$  (major) = 9.37 min;  $t_R$  (minor) = 18.42 min;  **$^1\text{H}$  NMR (500 MHz, Chloroform-*d*)**  $\delta$  7.97-7.92 (m, 2H), 7.79 (d,  $J = 8.5$  Hz, 1H), 7.54-7.50 (m, 2H), 7.41-7.38 (m, 1H), 7.21 (s, 1H), 7.18-7.11 (m, 2H), 7.08-7.04 (m, 1H), 6.88 (d,  $J = 7.5$  Hz, 1H), 6.83-6.76 (m, 2H), 6.73-6.70 (m, 1H), 6.34-6.32 (m, 1H), 4.52 (d,  $J = 15.5$  Hz, 1H), 4.19 (d,  $J = 15.5$  Hz, 1H) ppm.  **$^{19}\text{F}$  NMR (470 MHz, Chloroform-*d*)**  $\delta$  -113.22 ppm.  **$^{13}\text{C}$  NMR (125 MHz, Chloroform-*d*)**  $\delta$  166.9, 163.6, 161.6, 146.3, 145.1, 140.4, 140.4, 136.5, 131.5, 130.2, 129.7, 129.7, 129.5, 128.1, 128.0, 127.9, 127.1, 126.2, 125.9, 124.1, 124.1, 123.9, 120.1, 119.0, 115.3, 115.2, 114.2, 114.1, 76.1, 42.6 ppm. **HRMS** (ESI)  $m/z$  calculated for  $\text{C}_{26}\text{H}_{19}\text{FN}_3\text{O}^+ \text{M} + \text{H}^+$ : 408.1507, found 408.1514.

**(S)-2-Benzyl-3'H-spiro[benzo[e]isoindole-1,4'-quinazolin]-3(2H)-one (4ac).**

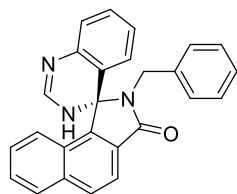

Colorless oil, 72% (28.0 mg) isolated yield,  $[\alpha]_D^{20} = +51.90$  ( $c = 1.0$  in  $\text{CHCl}_3$ ); 96% *ee*, determined by HPLC analysis (Chiralpak IC-3 column, *n*-hexane/*i*-PrOH = 70:30 (v/v), flow rate 1.0 mL/min,  $\lambda = 254$  nm, 25 °C),  $t_R$  (major) = 8.44 min;  $t_R$  (minor) = 23.44 min;  $^1\text{H}$  NMR (500 MHz, Chloroform-*d*)  $\delta$  8.00 (d,  $J = 8.5$  Hz, 1H), 7.94 (d,  $J = 8.5$  Hz, 1H), 7.88 (d,  $J = 8.5$  Hz, 1H), 7.54-7.51 (m, 2H), 7.41-7.38 (m, 1H), 7.22-7.13 (m, 8H), 6.80-6.76 (m, 1H), 6.40 (d,  $J = 8.0$  Hz, 1H), 4.81 (d,  $J = 15.5$  Hz, 1H), 4.05 (d,  $J = 15.5$  Hz, 1H) ppm.  $^{13}\text{C}$  NMR (125 MHz, Chloroform-*d*)  $\delta$  166.8, 146.1, 145.0, 138.1, 136.5, 131.6, 130.2, 129.5, 128.6, 128.4, 128.3, 127.9, 127.3, 127.1, 126.1, 123.9, 120.6, 119.2, 75.9, 43.1 ppm. HRMS (ESI)  $m/z$  calculated for  $\text{C}_{26}\text{H}_{20}\text{N}_3\text{O}^+$   $[\text{M}+\text{H}]^+$ : 390.1601, found 390.1600.

**(S)-2-(4-Methoxybenzyl)-3'H-spiro[benzo[e]isoindole-1,4'-quinazolin]-3(2H)-one (4ad).**

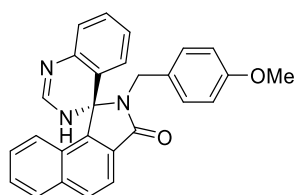

Yellow oil, 99% (41.4 mg) isolated yield,  $[\alpha]_D^{20} = +17.04$  ( $c = 1.0$  in  $\text{CHCl}_3$ ); 94% *ee*, determined by HPLC analysis (Chiralpak IC-3 column, *n*-hexane/*i*-PrOH = 60:40 (v/v), flow rate 0.8 mL/min,  $\lambda = 254$  nm, 25 °C),  $t_R$  (major) = 13.15 min;  $t_R$  (minor) = 33.17 min;  $^1\text{H}$  NMR (500 MHz, Chloroform-*d*)  $\delta$  7.93-7.92 (m, 2H), 7.76 (d,  $J = 8.5$  Hz, 1H), 7.52-7.48 (m, 2H), 7.39-7.36 (m, 1H), 7.21-7.19 (m, 3H), 7.10-7.08 (m, 2H), 6.78-6.75 (m, 1H), 6.66-6.63 (m, 2H), 6.37-6.35 (m, 1H), 4.70 (d,  $J = 15.5$  Hz, 1H), 4.05 (d,  $J = 15.5$  Hz, 1H), 3.68 (s, 3H) ppm.  $^{13}\text{C}$  NMR (125 MHz, Chloroform-*d*)  $\delta$  166.8, 158.7, 146.2, 145.2, 136.4, 131.5, 130.3, 130.1, 129.9, 129.4, 128.3, 127.9, 127.0, 126.1, 126.0, 123.8, 120.6, 119.0, 113.6, 75.9, 55.3, 42.6 ppm. HRMS (ESI)  $m/z$  calculated for  $\text{C}_{27}\text{H}_{22}\text{N}_3\text{O}^+$   $[\text{M}+\text{H}]^+$ : 420.1707, found 420.1710.

**(S)-2-(4-Chlorobenzyl)-3'H-spiro[benzo[e]isoindole-1,4'-quinazolin]-3(2H)-one (4ae).**

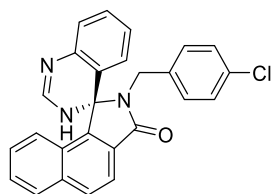

Yellow oil, 77% (32.5 mg) isolated yield,  $[\alpha]_D^{20} = +44.56$  ( $c = 1.0$  in  $\text{CHCl}_3$ ); 98% *ee*, determined by HPLC analysis (Chiralpak IC-3 column, *n*-hexane/*i*-PrOH = 60:40 (v/v), flow rate 0.8 mL/min,  $\lambda = 254$  nm, 25 °C),  $t_R$  (major) = 8.99 min;  $t_R$  (minor) = 15.45 min;  $^1\text{H}$  NMR (500 MHz, Chloroform-*d*)  $\delta$  7.95-7.90 (m, 2H), 7.77 (d,  $J = 8.5$  Hz, 1H), 7.53-7.48 (m, 2H), 7.41-7.37 (m, 1H),



7.19-7.15 (m, 2H), 7.11-7.09 (m, 1H), 7.05-7.00 (m, 4H), 6.74-6.70 (m, 1H), 6.31-6.30 (m, 1H), 4.49 (d,  $J = 15.5$  Hz, 1H), 4.13 (d,  $J = 15.5$  Hz, 1H) ppm.  $^{13}\text{C}$  NMR (125 MHz, Chloroform- $d$ )  $\delta$  166.9, 146.3, 145.1, 136.4, 136.4, 133.0, 131.5, 130.1, 129.9, 129.5, 128.3, 128.1, 128.0, 128.0, 127.0, 126.2, 126.0, 123.8, 120.1, 119.0, 76.0, 42.4 ppm. HRMS (ESI)  $m/z$  calculated for  $\text{C}_{26}\text{H}_{19}\text{ClN}_3\text{O}^+ [\text{M}+\text{H}]^+$ : 424.1211, found 424.1219.

**(S)-2-(4-Bromobenzyl)-3'H-spiro[benzo[e]isoindole-1,4'-quinazolin]-3(2H)-one (4af).**

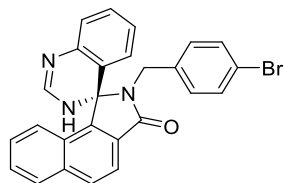

Yellow oil, 74% (34.6 mg) isolated yield,  $[\alpha]_{\text{D}}^{20} = +32.64$  ( $c = 1.0$  in  $\text{CHCl}_3$ ); 98%  $ee$ , determined by HPLC analysis (Chiralpak IC-3 column,  $n$ -hexane/ $i$ -PrOH = 60:40 (v/v), flow rate 0.8 mL/min,  $\lambda = 254$  nm, 25 °C),  $t_{\text{R}}$  (major) = 9.28 min;  $t_{\text{R}}$  (minor) = 16.16 min;  $^1\text{H}$  NMR (500

MHz, Chloroform- $d$ )  $\delta$  7.97 (d,  $J = 8.5$  Hz, 1H), 7.93 (d,  $J = 8.0$  Hz, 1H), 7.81 (d,  $J = 8.5$  Hz, 1H), 7.54-7.49 (m, 2H), 7.41-7.38 (m, 1H), 7.23-7.14 (m, 5H), 7.00-6.98 (m, 2H), 6.76-6.73 (m, 1H), 6.34-6.32 (m, 1H), 4.55 (d,  $J = 15.5$  Hz, 1H), 4.11 (d,  $J = 15.5$  Hz, 1H) ppm.  $^{13}\text{C}$  NMR (125 MHz, Chloroform- $d$ )  $\delta$  166.9, 146.2, 145.0, 137.0, 136.5, 131.6, 131.3, 130.3, 130.2, 129.5, 128.1, 128.0, 128.0, 127.0, 126.2, 126.1, 123.8, 121.2, 120.2, 119.1, 76.0, 42.5 ppm. HRMS (ESI)  $m/z$  calculated for  $\text{C}_{26}\text{H}_{19}\text{BrN}_3\text{O}^+ [\text{M}+\text{H}]^+$ : 468.0706, found 468.0707.

**(S)-2-(4-Bromophenethyl)-3'H-spiro[benzo[e]isoindole-1,4'-quinazolin]-3(2H)-one (4ag).**

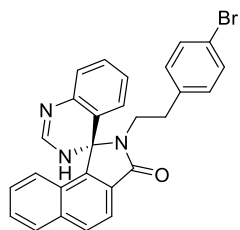

Yellow oil, 54% (25.9 mg) isolated yield,  $[\alpha]_{\text{D}}^{25} = +64.97$  ( $c = 1.0$  in  $\text{CHCl}_3$ ); 95%  $ee$ , determined by HPLC analysis (Chiralpak IC-3 column,  $n$ -hexane/ $i$ -PrOH, 70:30 v/v, flow rate 1.0 mL/min,  $\lambda = 254$  nm, 25 °C),  $t_{\text{R}}$  (major) = 5.90 min;  $t_{\text{R}}$  (minor) = 6.89 min;  $^1\text{H}$  NMR (500 MHz,

Chloroform- $d$ )  $\delta$  7.97-7.90 (m, 2H), 7.75 (d,  $J = 8.0$  Hz, 1H), 7.58-7.48 (m, 2H), 7.48-7.38 (m, 2H), 7.35-7.25 (m, 4H), 6.93-6.91 (m, 2H), 6.89-6.86 (m, 1H), 6.45 (d,  $J = 8.0$  Hz, 1H), 3.56-3.35 (m, 2H), 2.98-2.84 (m, 1H), 2.54-2.42 (m, 1H) ppm.  $^{13}\text{C}$  NMR (125 MHz, Chloroform- $d$ )  $\delta$  166.9, 146.0, 145.2, 141.7, 136.4, 132.0, 131.6, 130.4, 130.2, 129.7, 129.5, 128.5, 128.0, 128.0, 127.7, 127.0, 126.3, 126.0, 123.8, 122.6, 120.5, 118.9, 75.8, 41.8, 34.4 ppm. HRMS (ESI)  $m/z$  calculated for  $\text{C}_{27}\text{H}_{20}\text{N}_3\text{OBrNa}^+ [\text{M}+\text{Na}]^+$ : 504.0687, found 504.0684.

**(S)-2-(3-Bromophenethyl)-3'H-spiro[benzo[e]isoindole-1,4'-quinazolin]-3(2H)-one (4ah).**

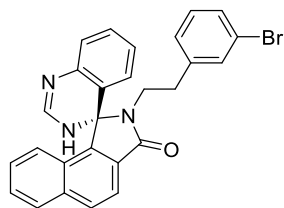

Yellow oil, 50% (23.8 mg) isolated yield,  $[\alpha]_D^{25} = +64.40$  ( $c = 1.0$  in  $\text{CHCl}_3$ ); 97% *ee*, determined by HPLC analysis (Chiralpak IC-3 column, *n*-hexane/*i*-PrOH, 70:30 v/v, flow rate 1.0 mL/min,  $\lambda = 254$  nm, 25 °C),  $t_R$  (major) = 5.56 min;  $t_R$  (minor) = 7.22 min;  $^1\text{H}$  NMR (500 MHz, Chloroform-*d*)  $\delta$  7.96-7.90 (m, 2H), 7.75 (d,  $J = 8.5$  Hz, 1H), 7.57-7.48 (m, 2H), 7.47-7.38 (m, 2H), 7.36-7.27 (m, 3H), 7.20-7.17 (m, 1H), 7.08 (t,  $J = 8.0$  Hz, 1H), 7.01-6.96 (m, 1H), 6.91-6.84 (m, 1H), 6.50-6.44 (m, 1H), 3.55-3.35 (m, 2H), 2.97-2.86 (m, 1H), 2.52-2.42 (m, 1H) ppm.  $^{13}\text{C}$  NMR (125 MHz, Chloroform-*d*)  $\delta$  166.9, 146.0, 145.2, 141.7, 136.4, 132.0, 131.6, 130.4, 130.2, 129.7, 129.5, 128.5, 128.0, 128.0, 127.7, 127.0, 126.3, 126.0, 123.8, 122.6, 120.5, 118.9, 75.8, 41.8, 34.4 ppm. HRMS (ESI)  $m/z$  calculated for  $\text{C}_{27}\text{H}_{20}\text{N}_3\text{OBrNa}^+ [\text{M}+\text{Na}]^+$ : 504.0687, found 504.0688.

**(S)-2-(4-Fluorophenethyl)-3'H-spiro[benzo[e]isoindole-1,4'-quinazolin]-3(2H)-one (4ai).**

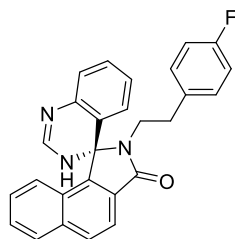

Yellow oil, 48% (20.1 mg) isolated yield,  $[\alpha]_D^{25} = +68.71$  ( $c = 1.0$  in  $\text{CHCl}_3$ ); 96% *ee*, determined by HPLC analysis (Chiralpak IC-3 column, *n*-hexane/*i*-PrOH, 70:30 v/v, flow rate 1.0 mL/min,  $\lambda = 254$  nm, 25 °C),  $t_R$  (major) = 5.56 min;  $t_R$  (minor) = 6.43 min;  $^1\text{H}$  NMR (500 MHz, Chloroform-*d*)  $\delta$  7.98-7.92 (m, 2H), 7.77 (d,  $J = 8.5$  Hz, 1H), 7.57-7.46 (m, 3H), 7.44-7.37 (m, 1H), 7.36-7.28 (m, 2H), 7.05-6.98 (m, 2H), 6.93-6.86 (m, 3H), 6.52-6.46 (m, 1H), 3.58-3.48 (m, 1H), 3.41-3.31 (m, 1H), 3.01-2.90 (m, 1H), 2.54-2.44 (m, 1H) ppm.  $^{19}\text{F}$  NMR (470 MHz, Chloroform-*d*)  $\delta$  -116.31 ppm.  $^{13}\text{C}$  NMR (125 MHz, Chloroform-*d*)  $\delta$  166.9, 162.6, 160.7, 145.7, 145.4, 136.4, 135.03 (d,  $J = 3.2$  Hz), 131.7, 130.5, 130.5, 130.4, 129.5, 128.6, 128.0, 128.0, 127.0, 126.5, 126.0, 123.7, 120.7, 118.9, 115.4 (d,  $J = 21.1$  Hz), 75.6, 42.3, 33.9 ppm. HRMS (ESI)  $m/z$  calculated for  $\text{C}_{27}\text{H}_{20}\text{N}_3\text{OFNa}^+ [\text{M}+\text{Na}]^+$ : 444.1488, found 444.1483.

**(S)-2-(2-Chlorophenethyl)-3'H-spiro[benzo[e]isoindole-1,4'-quinazolin]-3(2H)-one (4aj).**

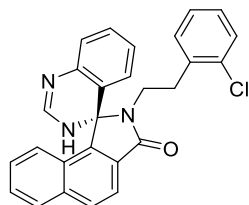

Yellow oil, 90% (39.5 mg) isolated yield,  $[\alpha]_D^{20} = +21.55$  ( $c = 1.0$  in  $\text{CHCl}_3$ ); 84% *ee*, determined by HPLC analysis (Chiralpak IC-3 column, *n*-hexane/*i*-PrOH = 60:40 (v/v), flow rate 0.8 mL/min,  $\lambda = 254$  nm, 25 °C),  $t_R$  (major) = 8.24 min;  $t_R$  (minor) = 9.42 min;  $^1\text{H}$  NMR (500 MHz,

**Chloroform-*d***  $\delta$  7.95-7.90 (m, 2H), 7.79 (d,  $J$  = 8.0 Hz, 1H), 7.52- 7.49 (m, 2H), 7.40-7.37 (m, 1H), 7.31-7.24 (m, 4H), 7.13-7.09 (m, 3H), 6.87-6.84 (m, 1H), 6.50-6.48 (m, 1H), 3.55-3.50 (m, 1H), 3.38-3.32 (m, 1H), 3.10-3.04 (m, 1H), 2.73-2.68 (m, 1H) ppm.  **$^{13}\text{C}$  NMR (125 MHz, Chloroform-*d*)**  $\delta$  167.1, 145.1, 137.1, 136.4, 134.4, 131.5, 131.4, 130.2, 129.6, 129.5, 128.3, 128.1, 127.9, 127.9, 127.1, 127.0, 126.0, 126.0, 123.8, 120.4, 118.9, 76.0, 40.0, 32.7 ppm. **HRMS (ESI)**  $m/z$  calculated for  $\text{C}_{27}\text{H}_{21}\text{ClN}_3\text{O}^+$   $[\text{M}+\text{H}]^+$ : 438.1368, found 438.1371.

**(*S*)-2-(3,4-dimethoxyphenethyl)-3'H-spiro[benzo[*e*]isoindole-1,4'-quinazolin]-3(2H)-one (4ak).**

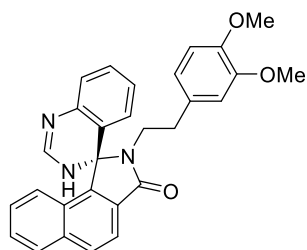

Yellow oil, 76% (35.1 mg) isolated yield,  $[\alpha]_{\text{D}}^{20} = +66.90$  ( $c$  = 1.0 in  $\text{CHCl}_3$ ); 96% *ee*, determined by HPLC analysis (Chiralpak IC-3 column, *n*-hexane/*i*-PrOH = 60:40 (v/v), flow rate 0.8 mL/min,  $\lambda$  = 254 nm, 25 °C),  $t_{\text{R}}$  (major) = 21.25 min;  $t_{\text{R}}$  (minor) = 28.97 min;  **$^1\text{H}$  NMR (500 MHz, Chloroform-*d*)**  $\delta$  7.98-7.93 (m, 2H), 7.83 (d,  $J$  = 8.5 Hz, 1H), 7.55-7.49 (m, 2H), 7.42-7.38 (m, 1H), 7.35-7.27 (m, 3H), 6.90-6.86 (m, 1H), 6.71 (d,  $J$  = 8.0 Hz, 1H), 6.63-6.61 (m, 2H), 6.50-6.49 (m, 1H), 3.79 (s, 3H), 3.78 (s, 3H), 3.62-3.56 (m, 1H), 3.39-3.33 (m, 1H), 3.07-3.01 (m, 1H), 2.54-2.49 (m, 1H) ppm.  **$^{13}\text{C}$  NMR (125 MHz, Chloroform-*d*)**  $\delta$  166.9, 148.9, 147.6, 146.0, 145.3, 136.3, 132.0, 131.5, 130.2, 129.4, 128.6, 127.9, 127.9, 127.0, 126.1, 126.0, 123.8, 121.0, 118.8, 112.2, 111.3, 75.7, 56.0, 56.0, 42.3, 34.2 ppm. **HRMS (ESI)**  $m/z$  calculated for  $\text{C}_{29}\text{H}_{26}\text{N}_3\text{O}_3^+$   $[\text{M}+\text{H}]^+$ : 464.1969, found 464.1972.

**(*S*)-2-(3-Methoxypropyl)-3'H-spiro[benzo[*e*]isoindole-1,4'-quinazolin]-3(2H)-one (4al).**

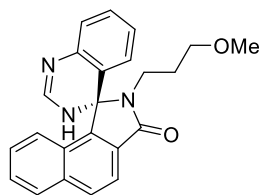

Colorless oil, 74% (27.4 mg) isolated yield,  $[\alpha]_{\text{D}}^{25} = +30.65$  ( $c$  = 1.0 in  $\text{CHCl}_3$ ); 98% *ee*, determined by HPLC analysis (Chiralpak IC-3 column, *n*-hexane/*i*-PrOH, 70:30 v/v, flow rate 1.0 mL/min,  $\lambda$  = 254 nm, 25 °C),  $t_{\text{R}}$  (major) = 12.44 min;  $t_{\text{R}}$  (minor) = 15.38 min;  **$^1\text{H}$  NMR (500 MHz, Chloroform-*d*)**  $\delta$  7.97-7.91 (m, 2H), 7.74 (d,  $J$  = 8.5 Hz, 1H), 7.60 (s, 1H), 7.56-7.49 (m, 2H), 7.45-7.39 (m, 1H), 7.26-7.18 (m, 2H), 6.89-6.83 (m, 1H), 6.51-6.46 (m, 1H), 3.45-3.34 (m, 1H), 3.33-3.18 (m, 3H), 3.13 (s, 3H), 1.72-1.60 (m, 1H), 1.60-1.48 (m, 1H) ppm.  **$^{13}\text{C}$  NMR (125 MHz, Chloroform-*d*)**  $\delta$  167.1, 146.6, 145.6, 140.2, 136.4, 131.4, 130.2, 129.5, 128.3, 127.9, 127.8, 127.0,

126.1, 126.0, 123.8, 123.4, 120.5, 118.9, 76.0, 70.6, 58.4, 37.2, 28.7 ppm. **HRMS** (ESI)  $m/z$  calculated for  $C_{23}H_{21}N_3O_2Na^+$   $[M+Na]^+$ : 394.1531, found 394.1526.

**(S)-2-Butyl-3'H-spiro[benzo[e]isoindole-1,4'-quinazolin]-3(2H)-one (4am).**

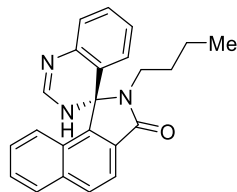

Colorless oil, 90% (32.0 mg) isolated yield,  $[\alpha]_D^{20} = +114.90$  ( $c = 1.0$  in  $CHCl_3$ ); 93% *ee*, determined by HPLC analysis (Chiralpak IC-3 column, *n*-hexane/*i*-PrOH = 80:40 (v/v), flow rate 1.0 mL/min,  $\lambda = 254$  nm, 25 °C),  $t_R$  (major) = 11.20 min;  $t_R$  (minor) = 12.92 min;  **$^1H$  NMR (500 MHz, Chloroform-*d*)**  $\delta$  7.95-7.90 (m, 2H), 7.69 (d,  $J = 8.0$  Hz, 1H), 7.56-7.52 (m, 3H), 7.44-7.41 (m, 1H), 7.27-7.26 (m, 2H), 6.89-6.84 (m, 1H), 6.48 (d,  $J = 7.5$  Hz, 1H), 3.25-3.11 (m, 2H), 1.34-1.09 (m, 4H), 0.73 (t,  $J = 7.0$  Hz, 3H) ppm.  **$^{13}C$  NMR (125 MHz, Chloroform-*d*)**  $\delta$  166.9, 146.3, 145.4, 136.3, 131.4, 130.1, 129.4, 128.5, 127.9, 127.8, 127.1, 126.1, 125.8, 123.9, 120.9, 118.8, 75.9, 39.6, 31.0, 20.4, 13.7 ppm. **HRMS** (ESI)  $m/z$  calculated for  $C_{23}H_{22}N_3O^+$   $[M+H]^+$ : 356.1757, found 356.1760.

**(S)-2-(3-(Vinylloxy)propyl)-3'H-spiro[benzo[e]isoindole-1,4'-quinazolin]-3(2H)-one (4an).**

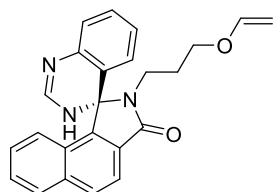

Colorless oil, 75% (28.6 mg) isolated yield,  $[\alpha]_D^{20} = +123.04$  ( $c = 1.0$  in  $CHCl_3$ ); 95% *ee*, determined by HPLC analysis (Chiralpak IC-3 column, *n*-hexane/*i*-PrOH = 60:40 (v/v), flow rate 0.8 mL/min,  $\lambda = 254$  nm, 25 °C),  $t_R$  (major) = 8.90 min;  $t_R$  (minor) = 11.02 min;  **$^1H$  NMR (500 MHz, Chloroform-*d*)**  $\delta$  7.94-7.91 (m, 2H), 7.71 (d,  $J = 8.0$  Hz, 1H), 7.54-7.50 (m, 3H), 7.43-7.40 (m, 1H), 7.25-7.22 (m, 2H), 6.87-6.84 (m, 1H), 6.47 (d,  $J = 7.5$  Hz, 1H), 6.35-6.30 (m, 1H), 4.07-4.04 (m, 1H), 3.92-3.91 (m, 1H), 3.58-3.54 (m, 1H), 3.51-3.47 (m, 1H), 3.38-3.32 (m, 1H), 3.28-3.22 (m, 1H), 1.81-1.73 (m, 1H), 1.65-1.57 (m, 1H) ppm.  **$^{13}C$  NMR (125 MHz, Chloroform-*d*)**  $\delta$  167.1, 151.7, 145.3, 136.4, 131.4, 130.2, 129.5, 128.3, 127.9, 127.9, 127.1, 126.1, 125.9, 123.8, 118.9, 86.8, 76.2, 65.7, 37.1, 28.3 ppm. **HRMS** (ESI)  $m/z$  calculated for  $C_{24}H_{22}N_3O_2^+$   $[M+H]^+$ : 384.1707, found 384.1707.

**(S)-2-(2-((*tert*-Butyldimethylsilyl)oxy)ethyl)-3'H-spiro[benzo[e]isoindole-1,4'-quinazolin]-3(2H)-one (4ao).**

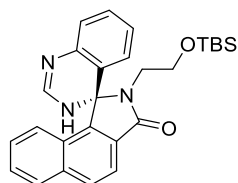

Colorless oil, 73% (32.2 mg) isolated yield,  $[\alpha]_D^{20} = +83.61$  ( $c = 1.0$  in  $\text{CHCl}_3$ ); 96% *ee*, determined by HPLC analysis (Chiralpak IC-3 column, *n*-hexane/*i*-PrOH = 70:30 (v/v), flow rate 1.0 mL/min,  $\lambda = 254$  nm, 25 °C),  $t_R$  (major) = 5.75 min;  $t_R$  (minor) = 6.57 min;  $^1\text{H NMR}$  (500 MHz, **Chloroform-*d***)  $\delta$  7.97-7.96 (m, 2H), 7.81 (d,  $J = 8.5$  Hz, 1H), 7.62 (s, 1H), 7.59-7.54 (m, 2H), 7.47-7.44 (m, 1H), 7.30-7.27 (m, 2H), 6.91-6.88 (m, 1H), 6.53 (d,  $J = 7.5$  Hz, 1H), 3.84-3.77 (m, 1H), 3.52-3.45 (m, 1H), 3.38-3.32 (m, 2H), 0.84 (s, 9H), 0.00 (s, 3H), -0.02 (s, 3H) ppm.  $^{13}\text{C NMR}$  (125 MHz, **Chloroform-*d***)  $\delta$  167.1, 154.7, 145.2, 136.4, 131.5, 130.2, 129.5, 128.2, 127.9, 127.9, 127.1, 126.0, 126.0, 123.9, 120.8, 119.0, 75.7, 60.2, 42.1, 26.1, 18.4, -5.2, -5.3 ppm. **HRMS** (ESI)  $m/z$  calculated for  $\text{C}_{27}\text{H}_{32}\text{N}_3\text{O}_2\text{Si}^+$   $[\text{M}+\text{H}]^+$ : 458.2258, found 458.2260.

**(S)-2-(2-(Methylthio)ethyl)-3'H-spiro[benzo[e]isoindole-1,4'-quinazolin]-3(2H)-one (4ap).**

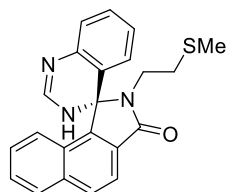

Colorless oil, 77% (28.8 mg) isolated yield,  $[\alpha]_D^{20} = +68.58$  ( $c = 1.0$  in  $\text{CHCl}_3$ ); 96% *ee*, determined by HPLC analysis (Chiralpak IC-3 column, *n*-hexane/*i*-PrOH = 60:40 (v/v), flow rate 1.0 mL/min,  $\lambda = 254$  nm, 25 °C),  $t_R$  (major) = 7.37 min;  $t_R$  (minor) = 9.53 min;  $^1\text{H NMR}$  (500 MHz, **Chloroform-*d***)  $\delta$  7.95-7.92 (m, 2H), 7.73 (d,  $J = 8.0$  Hz, 1H), 7.59 (s, 1H), 7.56-7.53 (m, 2H), 7.44-7.40 (m, 1H), 7.30-7.26 (m, 2H), 6.91-6.87 (m, 1H), 6.52 (d,  $J = 8.0$  Hz, 1H), 3.56-3.45 (m, 2H), 2.66-2.60 (m, 1H), 2.26-2.21 (m, 1H), 2.01 (s, 3H) ppm.  $^{13}\text{C NMR}$  (125 MHz, **Chloroform-*d***)  $\delta$  167.0, 145.4, 136.4, 131.5, 130.3, 129.5, 128.2, 127.9, 127.0, 126.2, 126.0, 123.8, 118.9, 75.9, 39.0, 32.5, 15.4 ppm. **HRMS** (ESI)  $m/z$  calculated for  $\text{C}_{22}\text{H}_{23}\text{N}_3\text{OS}^+$   $[\text{M}+\text{H}]^+$ : 374.1322, found 374.1329.

**(S)-2-(2,2-dimethoxypropyl)-3'H-spiro[benzo[e]isoindole-1,4'-quinazolin]-3(2H)-one (4aq).**

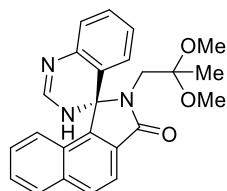

Yellow oil, 61% (24.5 mg) isolated yield,  $[\alpha]_D^{20} = +73.69$  ( $c = 1.0$  in  $\text{CHCl}_3$ ); 93% *ee*, determined by HPLC (Chiralpak IC-3 column, *n*-hexane/*i*-PrOH = 50:50 (v/v), flow rate 0.8 mL/min,  $\lambda = 254$  nm, 25 °C),  $t_R$  (major) = 8.18 min;  $t_R$  (minor) = 15.00 min;  $^1\text{H NMR}$  (500 MHz, **Chloroform-*d***)  $\delta$  7.99 (d,  $J = 8.0$  Hz, 1H), 7.94 (d,  $J = 8.0$  Hz, 1H), 7.87 (d,  $J = 8.5$  Hz, 1H), 7.59-7.57 (m, 2H), 7.55-7.52 (m,

1H), 7.44-7.41 (m, 1H), 7.32-7.26 (m, 2H), 6.90-6.87 (m, 1H), 6.46-6.44 (m, 1H), 3.70 (d,  $J = 15.0$  Hz, 1H), 3.27 (d,  $J = 15.0$  Hz, 1H), 3.15 (s, 3H), 3.03 (s, 3H), 1.35 (s, 3H) ppm. **<sup>13</sup>C NMR (125 MHz, Chloroform-*d*)**  $\delta$  168.5, 154.7, 147.1, 145.4, 136.6, 131.4, 130.0, 129.5, 127.2, 127.9, 127.4, 127.2, 125.9, 125.8, 123.9, 120.9, 119.0, 101.5, 76.7, 70.2, 48.7, 48.6, 44.9, 20.6 ppm. **HRMS (ESI)**  $m/z$  calculated for  $C_{24}H_{23}N_3O_3Na^+$   $[M+Na]^+$ : 424.1632, found 424.1635.

**(*S*)-2-(2-(methylsulfonyl)ethyl)-3'H-spiro[benzo[*e*]isoindole-1,4'-quinazolin]-3(2H)-one (4ar).**

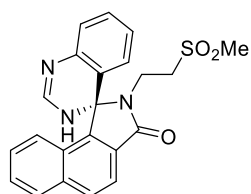

Colorless oil, 54% (22.0 mg) isolated yield,  $[\alpha]_D^{20} = +68.58$  ( $c = 1.0$  in  $CHCl_3$ ); 97% *ee*, determined by HPLC analysis (Chiralpak IC-3 column, *n*-hexane/*i*-PrOH = 50:50 (v/v), flow rate 0.5 mL/min,  $\lambda = 254$  nm, 25 °C),  $t_R$  (major) = 34.52 min;  $t_R$  (minor) = 44.19 min; **<sup>1</sup>H NMR (500 MHz, Chloroform-*d*)**  $\delta$  8.01-7.95 (m, 2H), 7.85 (d,  $J = 8.5$  Hz, 1H), 7.63 (s, 1H), 7.56-7.52 (m, 2H), 7.44-7.41 (m, 1H), 7.30-7.26 (m, 1H), 7.19-7.17 (m, 1H), 6.91-6.88 (m, 1H), 6.50 (d,  $J = 8.0$  Hz, 1H), 3.84-3.79 (m, 1H), 3.73-3.67 (m, 1H), 3.52-3.46 (m, 1H), 3.07-3.00 (m, 1H), 2.94 (s, 3H) ppm. **<sup>13</sup>C NMR (125 MHz, Chloroform-*d*)**  $\delta$  167.5, 147.4, 145.8, 136.6, 131.5, 130.5, 129.6, 128.1, 128.0, 127.7, 127.1, 126.1, 126.0, 123.8, 119.0, 76.8, 52.4, 40.9, 33.8 ppm. **HRMS (ESI)**  $m/z$  calculated for  $C_{22}H_{20}N_3O_3S^+$   $[M+H]^+$ : 406.1220, found 406.1222.

**(*S*)-2-(Pyridin-2-ylmethyl)-3'H-spiro[benzo[*e*]isoindole-1,4'-quinazolin]-3(2H)-one (4as).**

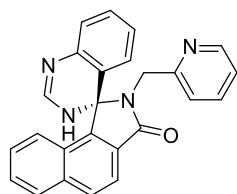

Colorless oil, 85% (33.3 mg) isolated yield,  $[\alpha]_D^{20} = -52.95$  ( $c = 1.0$  in  $CHCl_3$ ); 92% *ee*, determined by HPLC analysis (Chiralpak IC-3 column, *n*-hexane/*i*-PrOH = 40:60 (v/v), flow rate 0.5 mL/min,  $\lambda = 254$  nm, 25 °C),  $t_R$  (major) = 20.22 min;  $t_R$  (minor) = 30.93 min; **<sup>1</sup>H NMR (500 MHz, Chloroform-*d*)**  $\delta$  8.34-8.33 (m, 1H), 8.00-7.88 (m, 3H), 7.57-7.50 (m, 3H), 7.41-7.35 (m, 2H), 7.25-7.19 (m, 3H), 7.08-7.06 (m, 1H), 6.83-6.79 (m, 1H), 6.53 (d,  $J = 8.0$  Hz, 1H), 4.89 (d,  $J = 16.5$  Hz, 1H), 4.41 (d,  $J = 16.5$  Hz, 1H) ppm. **<sup>13</sup>C NMR (125 MHz, Chloroform-*d*)**  $\delta$  167.2, 157.1, 148.9, 147.3, 145.5, 136.7, 136.5, 131.3, 130.0, 129.4, 128.1, 127.9, 127.8, 127.2, 126.1, 125.8, 124.0, 122.8, 122.3, 119.3, 76.1, 44.8 ppm. **HRMS (ESI)**  $m/z$  calculated for  $C_{25}H_{19}N_4O^+$   $[M+H]^+$ : 391.1553, found 391.1555.

**(S)-2-(2-Methylallyl)-3'H-spiro[benzo[e]isoindole-1,4'-quinazolin]-3(2H)-one (4at).**

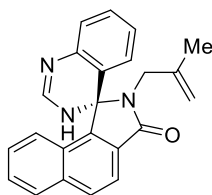

Colorless oil, 65% (22.8 mg) isolated yield,  $[\alpha]_D^{25} = +136.56$  ( $c = 1.0$  in  $\text{CHCl}_3$ ); 93% *ee*, determined by HPLC analysis (Chiralpak IA-3 column, *n*-hexane/*i*-PrOH, 90:10 v/v, flow rate 1.0 mL/min,  $\lambda = 254$  nm, 25 °C),  $t_R$  (major) = 19.54 min;  $t_R$  (minor) = 15.36 min;  $^1\text{H NMR}$  (500 MHz, Chloroform-*d*)  $\delta$  7.96-7.89 (m, 2H), 7.76-7.69 (m, 1H), 7.57-7.48 (m, 2H), 7.42-7.37 (m, 1H), 7.26-7.13 (m, 2H), 6.84 (t,  $J = 8.0$  Hz, 1H), 6.42 (d,  $J = 8.0$  Hz, 1H), 4.62 (d,  $J = 15.0$  Hz, 2H), 4.01 (d,  $J = 15.5$ , 1H), 3.63 (d,  $J = 15.5$  Hz, 1H), 1.59 (s, 3H) ppm.  $^{13}\text{C NMR}$  (125 MHz, Chloroform-*d*)  $\delta$  166.9, 146.2, 145.4, 140.9, 136.4, 131.4, 130.1, 129.4, 128.4, 127.9, 127.8, 127.1, 126.1, 125.8, 123.9, 120.6, 119.1, 112.8, 75.9, 45.4, 20.3 ppm. HRMS (ESI)  $m/z$  calculated for  $\text{C}_{23}\text{H}_{19}\text{N}_3\text{ONa}^+$   $[\text{M}+\text{Na}]^+$ : 376.1426, found 376.1423.

**(S)- 2-(Prop-2-yn-1-yl)-3'H- spiro[benzo[e]isoindole- 1,4'- quinazolin]- 3(2H)-one (4au).**

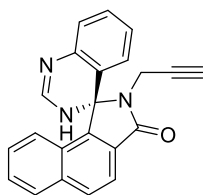

Colorless oil, 81% (27.4 mg) isolated yield,  $[\alpha]_D^{20} = +55.16$  ( $c = 1.0$  in  $\text{CHCl}_3$ ); 94% *ee*, determined by HPLC analysis (Chiralpak IC-3 column, *n*-hexane/*i*-PrOH = 70:30 (v/v), flow rate 0.5 mL/min,  $\lambda = 254$  nm, 25 °C),  $t_R$  (major) = 10.01 min;  $t_R$  (minor) = 10.57 min;  $^1\text{H NMR}$  (500 MHz, Chloroform-*d*)  $\delta$  7.91-7.87 (m, 2H), 7.69 (d,  $J = 8.0$  Hz, 1H), 7.53-7.49 (m, 3H), 7.41-7.38 (m, 1H), 7.22-7.19 (m, 1H), 7.15-7.13 (m, 1H), 6.84-6.81 (m, 1H), 6.43 (d,  $J = 7.0$  Hz, 1H), 4.26 (dd,  $J = 18.0, 2.5$  Hz, 1H), 3.86 (dd,  $J = 18.0, 2.5$  Hz, 1H), 2.00 (t,  $J = 2.5$  Hz, 1H) ppm.  $^{13}\text{C NMR}$  (125 MHz, Chloroform-*d*)  $\delta$  166.3, 146.8, 145.8, 136.4, 131.4, 130.2, 129.4, 128.0, 127.9, 127.7, 127.0, 126.3, 125.7, 123.9, 119.4, 118.9, 78.6, 76.0, 70.9, 28.1 ppm. HRMS (ESI)  $m/z$  calculated for  $\text{C}_{22}\text{H}_{16}\text{N}_3\text{O}^+$   $[\text{M}+\text{H}]^+$ : 338.1288, found 338.1289.

**(S)-tert-Butyl-2- (3-oxo-3'H-spiro[benzo[e]isoindole- 1,4'-quinazolin]- 2(3H)-yl)acetate (4av).**

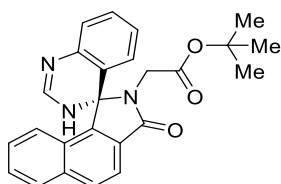

Colorless oil, 62% (25.6 mg) isolated yield,  $[\alpha]_D^{20} = +15.91$  ( $c = 1.0$  in  $\text{CHCl}_3$ ); 93% *ee*, determined by HPLC analysis (Chiralpak IC-3 column, *n*-hexane/*i*-PrOH = 50:50 (v/v), flow rate 0.8 mL/min,  $\lambda = 254$  nm, 25 °C),  $t_R$  (major) = 16.68 min;  $t_R$  (minor) = 32.76 min;  $^1\text{H NMR}$  (500 MHz, Chloroform-*d*)  $\delta$  8.02 (d,  $J = 10.5$  Hz, 1H), 7.95 (d,  $J = 10.5$  Hz, 1H), 7.91 (d,  $J = 10.5$  Hz, 1H), 7.56-7.51 (m, 3H), 7.43-7.39 (m, 1H), 7.34-7.25 (m, 2H), 6.92-6.88 (m, 1H), 6.55 (d,  $J = 9.5$

Hz, 1H), 4.30 (d,  $J = 22.5$  Hz, 1H), 3.55 (d,  $J = 22.5$  Hz, 1H), 1.40 (s, 9H) ppm.  $^{13}\text{C}$  NMR (125 MHz, Chloroform- $d$ )  $\delta$  168.7, 166.8, 146.3, 145.3, 141.9, 136.5, 131.6, 130.3, 129.5, 128.0, 128.0, 127.1, 126.3, 126.1, 125.5, 124.0, 120.5, 119.3, 82.6, 75.5, 41.4, 28.1 ppm. HRMS (ESI)  $m/z$  calculated for  $\text{C}_{25}\text{H}_{24}\text{N}_3\text{O}_3^+$   $[\text{M}+\text{H}]^+$ : 414.1812, found 414.1811.

**(S)-2-(Furan-2-ylmethyl)-3'H-spiro[benzo[e]isoindole-1,4'-quinazolin]-3(2H)-one (4aw).**

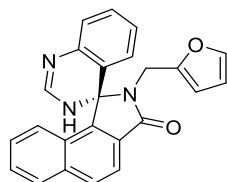

Colorless oil, 61% (22.9 mg) isolated yield,  $[\alpha]_{\text{D}}^{25} = +6.39$  ( $c = 1.0$  in  $\text{CHCl}_3$ ); 96% *ee*, determined by HPLC analysis (Chiralpak IA-3 column, *n*-hexane/*i*-PrOH, 90:10 v/v, flow rate 1.0 mL/min,  $\lambda = 254$  nm, 25 °C),  $t_{\text{R}}$  (major) = 37.45 min;  $t_{\text{R}}$  (minor) = 29.73 min;  $^1\text{H}$  NMR (500 MHz, Chloroform- $d$ )  $\delta$  7.95-7.87 (m, 2H), 7.78-7.72 (m, 1H), 7.55-7.48 (m, 2H), 7.42-7.37 (m, 1H), 7.34 (s, 1H), 7.25-7.14 (m, 3H), 6.84-6.76 (m, 1H), 6.42 (d,  $J = 8.0$  Hz, 1H), 6.17-6.11 (m, 1H), 6.04-6.01 (m, 1H), 4.76 (d,  $J = 16.0$  Hz, 1H), 4.20 (d,  $J = 16.0$  Hz, 1H) ppm.  $^{13}\text{C}$  NMR (125 MHz, Chloroform- $d$ )  $\delta$  166.6, 150.4, 146.3, 145.1, 142.1, 136.5, 131.5, 130.1, 129.4, 127.9, 127.9, 127.0, 126.0, 125.9, 123.8, 120.3, 119.1, 110.5, 108.6, 75.7, 35.5 ppm. HRMS (ESI)  $m/z$  calculated for  $\text{C}_{24}\text{H}_{17}\text{N}_3\text{O}_2\text{Na}^+$   $[\text{M}+\text{Na}]^+$ : 402.1218, found 402.1214.

**(S)-2-(Thiophen-2-ylmethyl)-3'H-spiro[benzo[e]isoindole-1,4'-quinazolin]-3(2H)-one (4ax).**

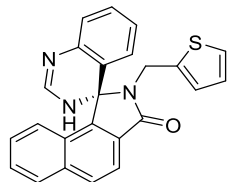

Yellow oil, 80% (31.6 mg) isolated yield,  $[\alpha]_{\text{D}}^{20} = +38.85$  ( $c = 1.0$  in  $\text{CHCl}_3$ ); 95% *ee*, determined by HPLC analysis (Chiralpak IC-3 column, *n*-hexane/*i*-PrOH = 60:40 (v/v), flow rate 0.8 mL/min,  $\lambda = 254$  nm, 25 °C),  $t_{\text{R}}$  (major) = 12.59 min;  $t_{\text{R}}$  (minor) = 29.12 min;  $^1\text{H}$  NMR (500 MHz, Chloroform- $d$ )  $\delta$  7.96-7.91 (m, 2H), 7.78 (d,  $J = 10.0$  Hz, 1H), 7.54-7.50 (m, 2H), 7.42-7.38 (m, 1H), 7.24 (s, 1H), 7.22-7.15 (m, 2H), 7.04-7.03 (m, 1H), 6.78-6.68 (m, 3H), 6.38-6.36 (m, 1H), 4.76 (d,  $J = 19.5$  Hz, 1H), 4.30 (d,  $J = 19.5$  Hz, 1H) ppm.  $^{13}\text{C}$  NMR (125 MHz, Chloroform- $d$ )  $\delta$  166.5, 146.3, 145.3, 140.2, 136.5, 131.5, 130.3, 129.5, 128.1, 128.0, 128.0, 127.2, 127.1, 126.5, 126.1, 125.9, 125.5, 123.9, 120.2, 119.1, 75.9, 37.6 ppm. HRMS (ESI)  $m/z$  calculated for  $\text{C}_{24}\text{H}_{18}\text{SN}_3\text{O}^+$   $[\text{M}+\text{H}]^+$ : 386.1165, found 386.1166.



**(S)-2-(Cyclohexylmethyl)- 3'H- spiro[benzo[e]isoindole- 1,4'-quinazolin]- 3(2H)- one (4ay).**

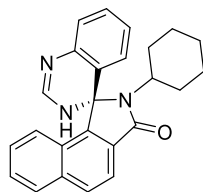

Colorless oil, 82% (31.4 mg) isolated yield,  $[\alpha]_D^{20} = +127.37$  ( $c = 1.0$  in  $\text{CHCl}_3$ ); 90% *ee*, determined by HPLC analysis (Chiralpak IC-3 column, *n*-hexane/*i*-PrOH = 70:30 (v/v), flow rate 0.5 mL/min,  $\lambda = 254$  nm, 25 °C),  $t_R$  (major) = 10.01 min;  $t_R$  (minor) = 10.57 min;  $^1\text{H NMR}$  (500 MHz, Chloroform-*d*)  $\delta$  7.84 (d,  $J = 8.5$  Hz, 1H), 7.73 (d,  $J = 8.5$  Hz, 1H), 7.47-7.22 (m, 7H), 6.84-6.79 (m, 1H), 6.48 (d,  $J = 8.0$  Hz, 1H), 3.13-3.08 (m, 1H), 2.26-2.09 (m, 2H), 1.75-1.70 (m, 2H), 1.59-1.51 (m, 2H), 1.27-0.89 (m, 4H) ppm.  $^{13}\text{C NMR}$  (125 MHz, Chloroform-*d*)  $\delta$  166.6, 146.3, 145.5, 136.1, 131.0, 130.0, 129.3, 129.0, 127.7, 127.6, 126.8, 126.4, 125.4, 123.5, 120.5, 118.5, 76.7, 53.8, 30.9, 29.8, 26.5, 26.3, 25.3 ppm. HRMS (ESI)  $m/z$  calculated for  $\text{C}_{25}\text{H}_{24}\text{N}_3\text{O}^+$   $[\text{M}+\text{H}]^+$ : 382.1914, found 382.1918.

**(S)-tert-Butyl-4-(3-oxo-3'H-spiro[benzo[e]isoindole-1,4'-quinazolin]-2(3H)-yl)piperidine-1-carboxylate (4az).**

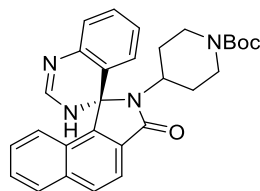

Yellow oil, 81% (39.1 mg) isolated yield,  $[\alpha]_D^{20} = +63.72$  ( $c = 1.0$  in  $\text{CHCl}_3$ ); 90% *ee*, determined by HPLC analysis (Chiralpak IC-3 column, *n*-hexane/*i*-PrOH = 60:40 (v/v), flow rate 0.8 mL/min,  $\lambda = 254$  nm, 25 °C),  $t_R$  (major) = 10.11 min;  $t_R$  (minor) = 11.97 min;  $^1\text{H NMR}$  (500 MHz, Chloroform-*d*)  $\delta$  7.94-7.90 (m, 2H), 7.76-7.74 (m, 1H), 7.52-7.36 (m, 4H), 7.25-7.20 (m, 2H), 6.88-6.84 (m, 1H), 6.56-6.54 (m, 1H), 4.09-3.91 (m, 3H), 3.29-3.26 (m, 1H), 2.58-2.29 (m, 3H), 1.55-1.52 (m, 1H), 1.38 (s, 9H), 1.11-1.08 (m, 1H) ppm.  $^{13}\text{C NMR}$  (125 MHz, Chloroform-*d*)  $\delta$  166.7, 154.8, 154.2, 146.4, 145.4, 136.3, 131.1, 130.2, 129.5, 128.9, 127.8, 127.7, 126.9, 126.4, 125.6, 123.5, 118.8, 79.8, 70.2, 51.9, 29.0, 28.5 ppm. HRMS (ESI)  $m/z$  calculated for  $\text{C}_{29}\text{H}_{31}\text{N}_4\text{O}_3^+$   $[\text{M}+\text{H}]^+$ : 483.2391, found 483.2395.

**(S)-2-Cyclopropyl-3'H-spiro[benzo[e]isoindole-1,4'-quinazolin]-3(2H)-one (4aaa).**

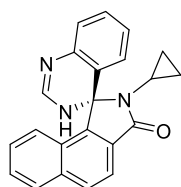

Colorless oil, 58% (19.8 mg) isolated yield,  $[\alpha]_D^{20} = +123.46$  ( $c = 1.0$  in  $\text{CHCl}_3$ ); 90% *ee*, determined by HPLC analysis (Chiralpak IC-3 column, *n*-hexane/*i*-PrOH = 60:40 (v/v), flow rate 1.0 mL/min,  $\lambda = 254$  nm, 25 °C),  $t_R$  (major) = 10.60 min;  $t_R$  (minor) = 12.87 min;  $^1\text{H NMR}$  (500 MHz, Chloroform-*d*)  $\delta$  7.94-7.89 (m, 2H), 7.71 (d,  $J = 10.5$  Hz, 1H), 7.60-7.52 (m, 3H), 7.28-7.26 (m, 3H), 6.91-6.84 (m, 1H), 6.46 (d,  $J$

= 10.0 Hz, 1H), 2.28-2.23 (m, 1H), 0.95-0.86 (m, 1H), 0.68-0.53 (m, 2H), 0.45-0.39 (m, 1H) ppm. **<sup>13</sup>C NMR (125 MHz, Chloroform-*d*)** δ 168.2, 146.0, 145.3, 136.5, 131.4, 130.0, 129.4, 128.4, 127.9, 127.8, 127.0, 125.8, 125.8, 124.0, 121.6, 118.7, 22.1, 4.3, 4.2 ppm. **HRMS (ESI)** *m/z* calculated for C<sub>22</sub>H<sub>18</sub>N<sub>3</sub>O<sup>+</sup> [M+H]<sup>+</sup>: 340.1450, found 340.1449.

**(*S*)-2-(((1*R*,4*aS*,10*aR*)-7-isopropyl-1,4*a*-dimethyl-1,2,3,4,4*a*,9,10,10*a*-octahydrophenanthren-1-yl)methyl)-3'-H-spiro[benzo[*e*]isoindole-1,4'-quinazolin]-3(2H)-one (4abb).**

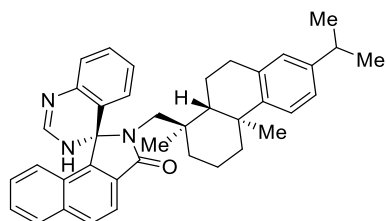

Colorless oil, 62% (35.1 mg) isolated yield, [ $\alpha$ ]<sub>D</sub><sup>20</sup> = +61.11 (*c* = 1.0 in CHCl<sub>3</sub>); 95:5 dr, determined by HPLC analysis (Chiralpak OD-3 column, *n*-hexane/*i*-PrOH = 80:20 (v/v), flow rate 0.5 mL/min,  $\lambda$  = 254 nm, 25 °C), *t<sub>R</sub>* (major) = 12.70 min; *t<sub>R</sub>* (minor) = 14.34 min; **<sup>1</sup>H NMR (400 MHz, Chloroform-*d*)** δ 7.89 (d, *J* = 10.5 Hz, 1H), 7.83 (d, *J* = 10.5 Hz, 1H), 7.62 (d, *J* = 10.5 Hz, 1H), 7.55 (s, 1H), 7.53-7.48 (m, 2H), 7.41-7.37 (m, 1H), 7.16-7.15 (m, 1H), 7.06-7.02 (m, 2H), 6.91-6.87 (m, 2H), 6.82-6.78 (m, 1H), 6.40 (d, *J* = 9.5 Hz, 1H), 3.30 (d, *J* = 18.0 Hz, 1H), 3.08 (d, *J* = 18.0 Hz, 1H), 2.91-2.77 (m, 3H), 2.15-2.10 (m, 1H), 1.95-1.90 (m, 1H), 1.72-1.66 (m, 1H), 1.57-1.44 (m, 2H), 1.30-1.16 (m, 11H), 1.13 (s, 3H), 0.93 (s, 3H) ppm. **<sup>13</sup>C NMR (125 MHz, Chloroform-*d*)** δ 169.9, 147.6, 146.8, 145.5, 144.9, 136.5, 135.1, 131.4, 130.0, 129.4, 127.9, 127.8, 127.7, 127.1, 127.0, 126.2, 126.0, 123.8, 123.7, 123.6, 118.8, 52.9, 46.1, 38.5, 38.0, 37.6, 37.3, 33.6, 29.7, 25.5, 24.2, 24.1, 19.8, 19.5, 18.8 ppm. **HRMS (ESI)** *m/z* calculated for C<sub>39</sub>H<sub>42</sub>N<sub>3</sub>O<sup>+</sup> [M+H]<sup>+</sup>: 568.3322, found 568.3319.

**(*S*)-3-Ethyl-5-methyl-(*R*)-4-(2-chlorophenyl)-6-methyl-2-((2-((*S*)-3-oxo-3'-H-spiro[benzo[*e*]isoindole-1,4'-quinazolin]-2(3H)-yl)ethoxy)methyl)-1,4-dihydropyridine-3,5-dicarboxylate (4acc).**

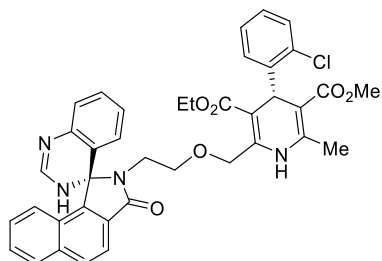

Colorless oil, 46% (31.7 mg) isolated yield, [ $\alpha$ ]<sub>D</sub><sup>20</sup> = +58.87 (*c* = 1.0 in CHCl<sub>3</sub>); **<sup>1</sup>H NMR (500 MHz, CD<sub>2</sub>Cl<sub>2</sub>)** 7.98-7.92 (m, 3H), 7.76 (d, *J* = 8.5 Hz, 1H), 7.58 (s, 1H), 7.53-7.49 (m, 2H), 7.40-7.37 (m, 1H), 7.28-7.18 (m, 3H), 7.13-7.11 (m, 2H), 7.03-7.00 (m, 1H), 6.96-6.93 (m, 1H), 6.79 (t, *J* = 7.5 Hz, 1H), 6.47 (d, *J* = 7.5 Hz, 1H), 5.14 (s, 1H), 4.47 (d, *J* = 16.0 Hz, 1H), 4.31 (d, *J* = 16.0 Hz, 1H), 3.85 (q, *J* = 7.0 Hz, 2H), 3.64-3.59 (m, 1H), 3.55-3.47 (m, 5H), 3.22-3.10 (m, 1H), 2.19 (s, 3H), 1.03 (t, *J* = 7.0

Hz, 3H) ppm. **<sup>13</sup>C NMR (125 MHz, CD<sub>2</sub>Cl<sub>2</sub>)** δ 167.9, 167.5, 167.1, 146.3, 145.9, 145.2, 145.1, 136.4, 132.1, 131.5, 131.3, 130.0, 129.5, 129.0, 128.2, 127.7, 127.7, 127.2, 127.0, 126.9, 125.9, 125.4, 123.5, 118.7, 103.3, 100.7, 77.6, 69.5, 68.0, 59.6, 50.5, 39.5, 37.1, 18.4, 14.0 ppm. **HRMS** (ESI) m/z calculated for C<sub>39</sub>H<sub>35</sub>ClN<sub>4</sub>O<sub>6</sub><sup>+</sup> [M+H]<sup>+</sup>: 691.2318, found 691.2315.

**(S)-6'-Methyl-2-phenethyl-3'H-spiro[benzo[e]isoindole-1,4'-quinazolin]-3(2H)-one (4ba).**

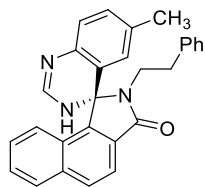

Colorless oil, 66% (27.6 mg) isolated yield, [α]<sub>D</sub><sup>25</sup> = +96.06 (*c* = 1.0 in CHCl<sub>3</sub>); 95% *ee*, determined by HPLC analysis (Chiralpak IA-3 column, *n*-hexane/*i*-PrOH, 85:15 v/v, flow rate 1.0 mL/min, λ = 254 nm, 25 °C), *t*<sub>R</sub> (major) = 14.61 min; *t*<sub>R</sub> (minor) = 10.49 min; **<sup>1</sup>H NMR (500 MHz, Chloroform-*d*)** δ 7.99-7.92 (m, 2H), 7.85-7.80 (m, 1H), 7.57-7.48 (m, 2H), 7.43-7.36 (m, 1H), 7.25-7.14 (m, 4H), 7.14-7.04 (m, 4H), 6.28 (s, 1H), 3.70-3.62 (m, 1H), 3.33-3.23 (m, 1H), 3.15-3.05 (m, 1H), 2.66-2.57 (m, 1H), 2.02 (s, 3H) ppm. **<sup>13</sup>C NMR (125 MHz, Chloroform-*d*)** δ 167.0, 146.2, 144.7, 139.7, 138.9, 136.4, 136.0, 131.4, 131.2, 129.4, 129.3, 128.6, 128.5, 127.9, 127.8, 127.0, 126.5, 125.7, 124.7, 123.9, 120.4, 119.0, 75.8, 42.4, 34.7, 21.0 ppm. **HRMS** (ESI) m/z calculated for C<sub>28</sub>H<sub>24</sub>N<sub>3</sub>O<sup>+</sup> [M+H]<sup>+</sup>: 418.1914, found 418.1912.

**(S)-7'-Fluoro-2-phenethyl-3'H-spiro[benzo[e]isoindole-1,4'-quinazolin]-3(2H)-one (4ca).**

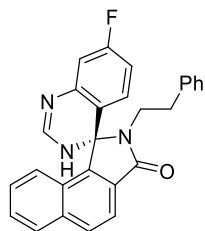

Yellow oil, 59% (27.7 mg) isolated yield, [α]<sub>D</sub><sup>25</sup> = +95.28 (*c* = 1.0 in CHCl<sub>3</sub>); 97% *ee*, determined by HPLC analysis (Chiralpak IC-3 column, *n*-hexane/*i*-PrOH, 85:15 v/v, flow rate 1.0 mL/min, λ = 254 nm, 25 °C), *t*<sub>R</sub> (major) = 8.46 min; *t*<sub>R</sub> (minor) = 16.88 min; **<sup>1</sup>H NMR (500 MHz, Chloroform-*d*)** δ 7.96-7.90 (m, 2H), 7.75 (d, *J* = 8.5 Hz, 1H), 7.57-7.51 (m, 1H), 7.48-7.39 (m, 2H), 7.25-7.14 (m, 4H), 7.06-7.02 (m, 2H), 7.01-6.97 (m, 1H), 6.60-6.54 (m, 1H), 6.46-6.40 (m, 1H), 3.58-3.49 (m, 1H), 3.25-3.16 (m, 1H), 3.04-2.95 (m, 1H), 2.57-2.48 (m, 1H) ppm. **<sup>19</sup>F NMR (470 MHz, Chloroform-*d*)** δ -110.67 ppm. **<sup>13</sup>C NMR (125 MHz, Chloroform-*d*)** δ 166.9, 164.4, 162.5, 146.1, 145.7, 139.5, 136.4, 131.8, 129.6, 129.2, 128.7, 128.3, 128.06 (d, *J* = 6.0 Hz), 127.58 (d, *J* = 9.7 Hz), 126.9, 126.6, 123.6, 118.8, 116.7, 113.7 (d, *J* = 22.5 Hz), 75.3, 42.3, 34.6 ppm. **HRMS** (ESI) m/z calculated for C<sub>27</sub>H<sub>21</sub>FN<sub>3</sub>O<sup>+</sup> [M+H]<sup>+</sup>: 422.1663, found 422.1664.

**(S)-7'-Chloro-2-phenethyl-3'H-spiro[benzo[e]isoindole-1,4'-quinazolin]-3(2H)-one (4da).**

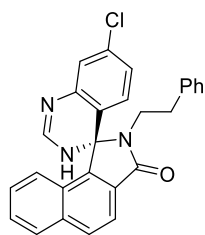

Colorless oil, 70% (30.4 mg) isolated yield,  $[\alpha]_D^{25} = +71.70$  ( $c = 1.0$  in  $\text{CHCl}_3$ ); 95% *ee*, determined by HPLC analysis (Chiralpak IA-3 column, *n*-hexane/*i*-PrOH, 90:10 v/v, flow rate 0.7 mL/min,  $\lambda = 254$  nm, 25 °C),  $t_R$  (major) = 38.75 min;  $t_R$  (minor) = 34.84 min;  $^1\text{H}$  NMR (500 MHz, Chloroform-*d*)  $\delta$  7.99-7.91 (m, 2H), 7.80 (d,  $J = 8.5$  Hz, 1H), 7.57-7.51 (m, 1H), 7.46-7.39 (m, 2H), 7.33-7.29 (m, 1H), 7.25-7.15 (m, 4H), 7.09-7.04 (m, 2H), 6.84-6.78 (m, 1H), 6.38 (d,  $J = 8.5$  Hz, 1H), 3.64-3.56 (m, 1H), 3.26-3.16 (m, 1H), 3.10-3.01 (m, 1H), 2.65-2.56 (m, 1H) ppm.  $^{13}\text{C}$  NMR (125 MHz, Chloroform-*d*)  $\delta$  166.8, 146.0, 145.5, 139.5, 136.3, 135.6, 131.7, 129.5, 129.2, 128.6, 128.3, 128.0, 128.0, 126.9, 126.8, 126.6, 126.2, 123.5, 119.3, 118.8, 75.1, 42.4, 34.4 ppm. HRMS (ESI)  $m/z$  calculated for  $\text{C}_{27}\text{H}_{21}\text{ClN}_3\text{O}^+ [\text{M}+\text{H}]^+$ : 438.1368, found 438.1369.

**(S)-2-Phenethyl-7'-(trifluoromethyl)- 3'H- spiro[benzo[e]isoindole-1,4'-quinazolin]-3(2H)-one (4ea).**

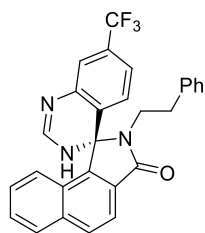

Colorless oil, 96% (45.3 mg) isolated yield,  $[\alpha]_D^{20} = +70.28$  ( $c = 1.0$  in  $\text{CHCl}_3$ ); 96% *ee*, determined by HPLC analysis (Chiralpak IC-3 column, *n*-hexane/*i*-PrOH = 50:50 (v/v), flow rate 0.8 mL/min,  $\lambda = 254$  nm, 25 °C),  $t_R$  (major) = 4.58 min;  $t_R$  (minor) = 5.17 min;  $^1\text{H}$  NMR (500 MHz, Chloroform-*d*)  $\delta$  7.96-7.93 (m, 2H), 7.75 (d,  $J = 8.5$  Hz, 1H), 7.58-7.54 (m, 2H), 7.45-7.41 (m, 2H), 7.26-7.15 (m, 4H), 7.06-7.01 (m, 3H), 6.54 (d,  $J = 8.0$  Hz, 1H), 5.94 (brs, 1H), 3.65-3.49 (m, 1H), 3.23-3.17 (m, 1H), 3.08-2.94 (m, 1H), 2.61-2.55 (m, 1H) ppm.  $^{19}\text{F}$  NMR (470 MHz, Chloroform-*d*)  $\delta$  -63.04 ppm.  $^{13}\text{C}$  NMR (125 MHz, Chloroform-*d*)  $\delta$  167.0, 146.2, 145.7, 139.4, 136.4, 132.4 (q,  $J = 31.5$  Hz), 132.0, 129.6, 129.2, 128.7, 128.3, 128.3, 128.2, 126.8, 126.7, 126.6, 124.7, 123.4, 122.5, 122.3, 120.3, 118.8, 75.2, 42.5, 34.5 ppm. HRMS (ESI)  $m/z$  calculated for  $\text{C}_{28}\text{H}_{21}\text{F}_3\text{N}_3\text{O}^+ [\text{M}+\text{H}]^+$ : 472.1631, found 472.1631.

**(S)-6'-Fluoro-2-phenethyl-3'H-spiro[benzo[e]isoindole-1,4'-quinazolin]-3(2H)-one (4fa).**

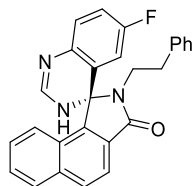

Colorless oil, 54% (22.7 mg) isolated yield,  $[\alpha]_D^{25} = +72.01$  ( $c = 1.0$  in  $\text{CHCl}_3$ ); 96% *ee*, determined by HPLC analysis (Chiralpak IA-3 column, *n*-hexane/*i*-PrOH, 70:30 v/v, flow rate 1.0 mL/min,  $\lambda = 254$  nm, 25 °C),  $t_R$  (major) = 7.00 min;  $t_R$  (minor) = 5.92min;  $^1\text{H}$  NMR (500 MHz, Chloroform-*d*)  $\delta$  7.98-7.88 (m,

2H), 7.68 (d,  $J = 8.0$  Hz, 1H), 7.58-7.51 (m, 1H), 7.48-7.44 (m, 1H), 7.44-7.39 (m, 1H), 7.33-7.28 (m, 1H), 7.24-7.14 (m, 4H), 7.10-7.05 (m, 2H), 7.00-6.94 (m, 1H), 6.13 (dd,  $J = 9.0, 3.0$  Hz, 1H), 3.66-3.56 (m, 1H), 3.36-3.27 (m, 1H), 3.10-3.00 (m, 1H), 2.64-2.55 (m, 1H) ppm.  **$^{19}\text{F}$  NMR (470 MHz, Chloroform-*d*)**  $\delta$  -114.78 ppm.  **$^{13}\text{C}$  NMR (125 MHz, Chloroform-*d*)**  $\delta$  166.7, 161.4, 159.4, 145.4, 144.9, 139.5, 138.1, 136.4, 131.8, 129.5, 129.2, 128.7, 128.4, 128.1, 128.0, 126.9, 126.7, 123.6, 122.4 (d,  $J = 7.4$  Hz), 118.8, 117.8 (d,  $J = 22.6$  Hz), 111.8 (d,  $J = 23.9$  Hz), 75.3, 42.4, 34.6 ppm. **HRMS** (ESI)  $m/z$  calculated for  $\text{C}_{27}\text{H}_{20}\text{FN}_3\text{ONa}^+$   $[\text{M}+\text{Na}]^+$ : 444.1485, found 444.1488.

**(*S*)-6'-Chloro-2-phenethyl-3'H-spiro[benzo[*e*]isoindole-1,4'-quinazolin]-3(2H)-one (4ga).**

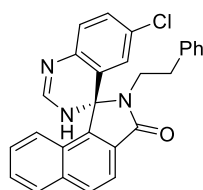

Colorless oil, 51% (22.3 mg) isolated yield,  $[\alpha]_{\text{D}}^{25} = +77.23$  ( $c = 1.0$  in  $\text{CHCl}_3$ ); 96% *ee*, determined by HPLC analysis (Chiralpak IA-3 column, *n*-hexane/*i*-PrOH, 85:15 v/v, flow rate 1.0 mL/min,  $\lambda = 254$  nm, 25 °C),  $t_{\text{R}}$  (major) = 10.93 min;  $t_{\text{R}}$  (minor) = 15.02 min;  **$^1\text{H}$  NMR (500 MHz, Chloroform-*d*)**  $\delta$  7.98-7.88 (m, 2H), 7.68 (d,  $J = 8.0$  Hz, 1H), 7.58-7.51 (m, 1H), 7.48-7.44 (m, 2H), 7.28-7.15 (m, 6H), 7.09-7.07 (m, 2H), 6.45 (s, 1H), 3.69-3.56 (m, 1H), 3.24-3.18 (m, 1H), 3.13-3.07 (m, 1H), 2.64-2.59 (m, 1H) ppm.  **$^{13}\text{C}$  NMR (125 MHz, Chloroform-*d*)**  $\delta$  166.9, 145.5, 145.4, 139.7, 136.5, 132.0, 131.1, 130.7, 129.7, 129.3, 128.8, 128.4, 128.2, 128.1, 126.9, 126.7, 125.4, 123.5, 122.5, 119.0, 75.1, 42.6, 34.5 ppm. **HRMS** (ESI)  $m/z$  calculated for  $\text{C}_{27}\text{H}_{21}\text{ClN}_3\text{O}^+$   $[\text{M}+\text{H}]^+$ : 438.1373, found 438.1371.

**(*S*)-8'-Methyl-2-phenethyl-3'H-spiro[benzo[*e*]isoindole-1,4'-quinazolin]-3(2H)-one (4ha).**

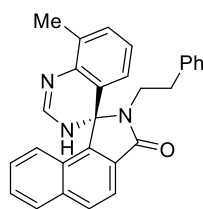

Colorless oil, 95% (39.6 mg) isolated yield,  $[\alpha]_{\text{D}}^{20} = +56.36$  ( $c = 1.0$  in  $\text{CHCl}_3$ ); 94% *ee*, determined by HPLC analysis (Chiralpak OD-3 column, *n*-hexane/*i*-PrOH = 60:40 (v/v), flow rate 0.2 mL/min,  $\lambda = 254$  nm, 25 °C),  $t_{\text{R}}$  (minor) = 23.72 min;  $t_{\text{R}}$  (major) = 27.15 min;  **$^1\text{H}$  NMR (500 MHz, Chloroform-*d*)**  $\delta$  7.93-7.89 (m, 2H), 7.79-7.75 (m, 1H), 7.53-7.49 (m, 2H), 7.39-7.36 (m, 1H), 7.31 (s, 1H), 7.23-7.13 (m, 4H), 7.03-7.00 (m, 2H), 6.75 (t,  $J = 7.5$  Hz, 1H), 6.32 (d,  $J = 8.0$  Hz, 1H), 3.54-3.40 (m, 1H), 3.25-3.19 (m, 1H), 3.01-2.86 (m, 1H), 2.53 (s, 3H), 2.45-2.38 (m, 1H) ppm.  **$^{13}\text{C}$  NMR (125 MHz, Chloroform-*d*)**  $\delta$  166.8, 144.5, 139.6, 136.3, 132.1, 132.0, 131.3, 129.4, 129.1, 128.7, 128.6, 128.5, 127.8, 127.1, 126.5, 125.3, 123.9, 123.6, 118.9, 76.0, 42.2, 34.7, 17.9 ppm. **HRMS** (ESI)  $m/z$  calculated for  $\text{C}_{28}\text{H}_{24}\text{N}_3\text{O}^+$   $[\text{M}+\text{H}]^+$ : 418.1914, found 418.1916.

**(S)-2'-Methyl-2-phenethyl-3'H-spiro[benzo[e]isoindole-1,4'-quinazolin]-3(2H)-one (4ia).**

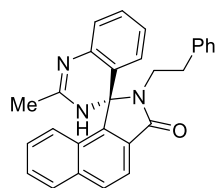

Colorless oil, 95% (39.6 mg) isolated yield,  $[\alpha]_D^{25} = +38.33$  ( $c = 1.0$  in  $\text{CHCl}_3$ ); 85% *ee*, determined by HPLC analysis (Chiralpak IA-3 column, *n*-hexane/*i*-PrOH, 70:30 v/v, flow rate 1.0 mL/min,  $\lambda = 254$  nm, 25 °C),  $t_R$  (major) = 6.33 min;  $t_R$  (minor) = 4.57 min;  **$^1\text{H}$  NMR (500 MHz, Chloroform-*d*)**  $\delta$

7.97-7.88 (m, 2H), 7.79-7.70 (m, 1H), 7.58-7.49 (m, 2H), 7.46-7.39 (m, 1H), 7.38-7.25 (m, 2H), 7.24-7.13 (m, 3H), 7.05-6.96 (m, 2H), 6.85 (t,  $J = 7.5$  Hz, 1H), 6.51 (d,  $J = 8.0$  Hz, 1H), 5.79 (brs, 1H), 3.54-3.42 (m, 1H), 3.36-3.18 (m, 1H), 3.04-2.92 (m, 1H), 2.48-2.32 (m, 1H), 2.16 (s, 3H) ppm.  **$^{13}\text{C}$  NMR (125 MHz,  $\text{CD}_2\text{Cl}_2$ )**  $\delta$  166.5, 153.8, 139.4, 136.3, 131.1, 129.9, 129.4, 129.3, 128.7, 128.7, 128.5, 128.5, 128.4, 127.6, 127.0, 126.3, 125.7, 124.9, 123.8, 119.3, 118.7, 118.6, 77.0, 41.8, 34.8, 22.3 ppm. **HRMS** (ESI)  $m/z$  calculated for  $\text{C}_{28}\text{H}_{23}\text{N}_3\text{ONa}^+$   $[\text{M}+\text{Na}]^+$ : 440.1739, found 440.1734.

**(S)-8-Methoxy-2-phenethyl-3'H-spiro[benzo[e]isoindole-1,4'-quinazolin]-3(2H)-one (4ja).**

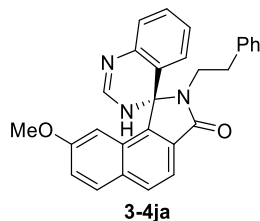

Colorless oil, 68% (29.5 mg) isolated yield,  $[\alpha]_D^{20} = +168.74$  ( $c = 1.0$  in  $\text{CHCl}_3$ ); 96% *ee*, determined by HPLC analysis (Chiralpak IC-3 column, *n*-hexane/*i*-PrOH = 70:30 (v/v), flow rate 1.0 mL/min,  $\lambda = 254$  nm, 25 °C),  $t_R$  (major) = 5.91 min;  $t_R$  (minor) = 9.23 min;  **$^1\text{H}$  NMR (500 MHz,**

**Chloroform-*d*)**  $\delta$  7.85 (d,  $J = 8.5$  Hz, 1H), 7.79 (d,  $J = 9.0$  Hz, 1H), 7.66 (d,  $J = 8.5$  Hz, 1H), 7.32-7.13 (m, 7H), 7.08-7.06 (m, 2H), 6.90-6.87 (m, 1H), 6.68 (d,  $J = 2.5$  Hz, 1H), 6.53-6.51 (m, 1H), 3.66-3.57 (m, 1H), 3.59 (s, 3H), 3.29-3.23 (m, 1H), 3.11-3.05 (m, 1H), 2.61-2.56 (m, 1H) ppm.  **$^{13}\text{C}$  NMR (125 MHz, Chloroform-*d*)**  $\delta$  167.5, 158.7, 145.3, 145.1, 139.8, 131.8, 131.0, 130.8, 130.2, 129.3, 128.7, 128.3, 128.3, 126.6, 126.2, 125.9, 120.8, 120.6, 116.6, 101.5, 75.7, 55.3, 42.5, 34.6 ppm. **HRMS** (ESI)  $m/z$  calculated for  $\text{C}_{28}\text{H}_{24}\text{N}_3\text{O}_2^+$   $[\text{M}+\text{H}]^+$ : 434.1863, found 434.1866.

**(S)-3-Oxo-2-phenethyl-2,3-dihydro-3'H-spiro[benzo[e]isoindole-1,4'-quinazoline]-7-carbonitrile (4ka).**

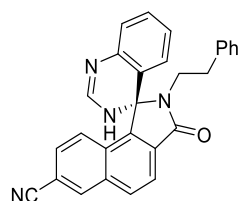

Colorless oil, 67% (29.5 mg) isolated yield,  $[\alpha]_D^{20} = +134.01$  ( $c = 1.0$  in  $\text{CHCl}_3$ ); 80% *ee*, determined by HPLC analysis (Chiralpak IC-3 column, *n*-hexane/*i*-PrOH = 50:50 (v/v), flow rate 0.8 mL/min,  $\lambda = 254$  nm, 25 °C),  $t_R$  (major) = 9.87 min;  $t_R$  (minor) = 12.19 min;  **$^1\text{H}$  NMR (500 MHz, Chloroform-*d*)**  $\delta$  8.31 (s, 1H), 8.07-8.01 (m, 2H), 7.58 (d,  $J = 8.5$  Hz, 1H), 7.50 (d,  $J = 8.5$  Hz, 1H), 7.33-7.18 (m, 6H), 7.09-7.08 (m, 2H), 6.92-6.89 (m, 1H), 6.46 (d,  $J = 8.0$  Hz, 1H), 3.65-3.59 (m, 1H), 3.33-3.26 (m, 1H), 3.09-3.03 (m, 1H), 2.61-2.56 (m, 1H) ppm.  **$^{13}\text{C}$  NMR (125 MHz, Chloroform-*d*)**  $\delta$  166.0, 145.0, 139.5, 135.3, 135.2, 131.9, 131.4, 130.6, 129.2, 128.8, 128.5, 128.4, 126.7, 126.3, 125.9, 125.1, 121.1, 119.7, 118.5, 111.4, 76.0, 42.6, 34.6 ppm. **HRMS (ESI)**  $m/z$  calculated for  $\text{C}_{28}\text{H}_{21}\text{N}_4\text{O}^+ [\text{M}+\text{H}]^+$ : 429.1710, found 429.1708.

**(S)-Methyl-3-oxo-2-phenethyl-2,3-dihydro-3'H-spiro[benzo[e]isoindole- 1,4'-quinazoline]- 7-carboxylate (4la).**

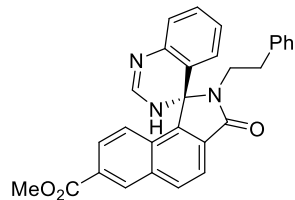

Colorless oil, 72% (33.2 mg) isolated yield,  $[\alpha]_D^{20} = +153.84$  ( $c = 1.0$  in  $\text{CHCl}_3$ ); 75% *ee*, determined by HPLC analysis (Chiralpak IC-3 column, *n*-hexane/*i*-PrOH = 50:50 (v/v), flow rate 0.8 mL/min,  $\lambda = 254$  nm, 25 °C),  $t_R$  (major) = 8.39 min;  $t_R$  (minor) = 9.82 min;  **$^1\text{H}$  NMR (500 MHz, Chloroform-*d*)**  $\delta$  8.65 (s, 1H), 8.11 (d,  $J = 8.5$  Hz, 1H), 7.97-7.93 (m, 2H), 7.53 (d,  $J = 8.5$  Hz, 1H), 7.31-7.17 (m, 6H), 7.13-7.12 (m, 2H), 6.90-6.87 (m, 1H), 6.47 (d,  $J = 8.0$  Hz, 1H), 3.94 (s, 3H), 3.69-3.64 (m, 1H), 3.33-3.26 (m, 1H), 3.13-3.11 (m, 1H), 2.64-2.59 (m, 1H) ppm.  **$^{13}\text{C}$  NMR (125 MHz, Chloroform-*d*)**  $\delta$  166.6, 166.4, 145.3, 139.4, 135.4, 132.7, 132.0, 130.5, 130.4, 129.1, 129.0, 128.9, 128.8, 128.7, 127.1, 126.6, 126.1, 125.9, 124.0, 119.8, 76.0, 52.6, 42.4, 34.7 ppm. **HRMS (ESI)**  $m/z$  calculated for  $\text{C}_{29}\text{H}_{24}\text{N}_3\text{O}_3^+ [\text{M}+\text{H}]^+$ : 462.1812, found 462.1810.

**2-Phenethyl-3'H- spiro[isoindoline- 1,4'- quinazolin]- 3- one (4oa).**

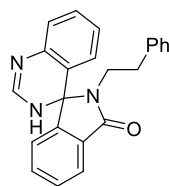

Colorless oil, 14% (4.9 mg) isolated yield, 0% *ee*, determined by HPLC analysis

(Chiralpak IC- 3 column, *n*-hexane/*i*-PrOH = 50:50 (v/v), flow rate 0.8 mL/min,  $\lambda$

= 254 nm, 25 °C),  $t_R$  (major) = 5.31 min;  $t_R$  (minor) = 7.58 min; **<sup>1</sup>H NMR (500**

**MHz, Chloroform-*d*)**  $\delta$  7.81 (d,  $J$  = 7.5 Hz, 1H), 7.56-7.48 (m, 2H), 7.33-7.16 (m,

7H), 7.06 (d,  $J$  = 7.0 Hz, 1H), 6.97-6.94 (m, 1H), 6.50 (d,  $J$  = 8.0 Hz, 1H), 3.52-3.47 (m, 1H), 3.22-

3.16 (m, 1H), 3.01-2.95 (m, 1H), 2.51-2.46 (m, 1H) ppm. **<sup>13</sup>C NMR (125 MHz, Chloroform-*d*)**  $\delta$

166.5, 150.2, 145.1, 139.6, 133.1, 130.6, 130.1, 130.0, 129.2, 128.6, 126.6, 126.4, 125.9, 124.0,

123.1, 120.6, 75.9, 42.5, 34.5 ppm. **HRMS (ESI)**  $m/z$  calculated for C<sub>23</sub>H<sub>20</sub>N<sub>3</sub>O<sup>+</sup> [M+H]<sup>+</sup>: 354.1601,

found 354.1603.

**(*S*)-2-(*p*-tolyl)-3'H-spiro[benzo[e]isoindole-1,4'-quinazolin]-3(2H)-one (5aa).**

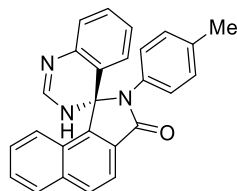

Colorless oil, 83% (32.2 mg) isolated yield,  $[\alpha]_D^{20}$  = -35.09 ( $c$  = 1.0 in

CHCl<sub>3</sub>); 93% *ee*, determined by HPLC analysis (Chiralpak IA-3 column, *n*-

hexane/*i*-PrOH = 80:20 (v/v), flow rate 1.0 mL/min,  $\lambda$  = 254 nm, 25 °C),  $t_R$

(major) = 21.50 min;  $t_R$  (minor) = 24.39 min; **<sup>1</sup>H NMR (500 MHz,**

**Chloroform-*d*)**  $\delta$  7.92 (d,  $J$  = 8.0 Hz, 1H), 7.84 (d,  $J$  = 8.0 Hz, 1H), 7.65 (d,  $J$  = 8.0 Hz, 1H), 7.56-

7.46 (m, 2H), 7.40-7.34 (m, 1H), 7.19-7.12 (m, 1H), 7.08 (s, 1H), 6.99-6.83 (m, 4H), 6.74-6.69 (m,

2H), 6.61-6.57 (m, 1H), 2.23 (s, 3H) ppm. **<sup>13</sup>C NMR (125 MHz, Chloroform-*d*)**  $\delta$  166.9, 146.5,

145.2, 138.0, 136.5, 132.2, 131.3, 129.9, 129.8, 129.4, 128.5, 128.3, 127.9, 127.7, 127.2, 126.2,

125.4, 124.2, 120.4, 119.1, 78.2, 21.3 ppm. **HRMS (ESI)**  $m/z$  calculated for C<sub>26</sub>H<sub>20</sub>N<sub>3</sub>O<sup>+</sup> [M+H]<sup>+</sup>:

390.1601, found 390.1600.

**(*S*)-3'-Acetyl-2-(4-(*tert*-butyl)phenyl)-3'H-spiro[benzo[e]isoindole-1,4'-quinazolin]-3(2H)-one (5ab).**

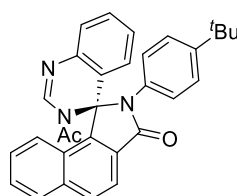

Colorless oil, 53% (25.1 mg) isolated yield,  $[\alpha]_D^{25}$  = -72.84 ( $c$  = 1.0 in

CHCl<sub>3</sub>); 91% *ee*, determined by HPLC analysis (Chiralpak IA-3 column, *n*-

hexane/*i*-PrOH, 50:50 v/v, flow rate 1.0 mL/min,  $\lambda$  = 254 nm, 25 °C),  $t_R$

(major) = 8.69 min;  $t_R$  (minor) = 16.67 min; **<sup>1</sup>H NMR (500 MHz,**

**Chloroform-*d*)**  $\delta$  8.11-8.04 (m, 2H),  $\delta$  8.02-7.95 (m, 2H), 7.57-7.49 (m, 1H), 7.44-7.31 (m, 4H),

7.30-7.20 (m, 3H), 7.05 (t,  $J$  = 8.0 Hz, 1H), 6.79 (d,  $J$  = 8.0 Hz, 1H), 6.77-6.70 (m, 1H), 2.15 (s,



3H), 1.27 (s, 9H) ppm. **<sup>13</sup>C NMR (125 MHz, Chloroform-*d*)**  $\delta$  169.4, 167.6, 150.8, 145.2, 141.6, 138.5, 136.3, 132.0, 130.9, 130.3, 129.8, 129.7, 128.2, 127.9, 127.7, 126.9, 126.4, 126.3, 126.1, 126.0, 124.5, 122.6, 119.8, 78.8, 34.6, 31.3, 23.8 ppm. **HRMS (ESI)**  $m/z$  calculated for  $C_{31}H_{27}N_3O_2Na^+$   $[M+Na]^+$ : 496.2001, found 496.2003.

**(*R*)-3'-acetyl-2-phenyl-3'H-spiro[benzo[*e*]isoindole-1,4'-quinazolin]-3(2H)-one (5ac).**

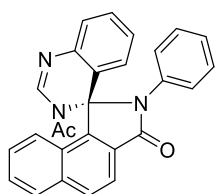

Yellow oil, 69% (28.8 mg) isolated yield,  $[\alpha]_D^{20} = +91.61$  ( $c = 1.0$  in  $CHCl_3$ ); 93% *ee*, determined by HPLC analysis (Chiralpak IC-3 column, *n*-hexane/*i*-PrOH = 40:60 (v/v), flow rate 0.5 mL/min,  $\lambda = 254$  nm, 25 °C),  $t_R$  (minor) = 39.38 min;  $t_R$  (major) = 67.63 min; **<sup>1</sup>H NMR (500 MHz, Chloroform-*d*)**  $\delta$  8.10-8.06 (m, 2H), 8.00-7.98 (m, 2H), 7.55-7.51 (m, 1H), 7.42-7.33 (m, 4H), 7.28-7.26 (m, 3H), 7.07-7.04 (m, 1H), 6.85-6.83 (m, 2H), 6.79-6.77 (m, 1H), 2.15 (s, 3H) ppm. **<sup>13</sup>C NMR (125 MHz, Chloroform-*d*)**  $\delta$  169.5, 167.7, 145.3, 141.6, 138.7, 136.5, 135.1, 131.1, 130.4, 129.9, 129.8, 129.5, 128.3, 128.2, 128.0, 127.9, 127.1, 127.0, 126.1, 124.6, 122.7, 119.9, 79.0, 23.9 ppm. **HRMS (ESI)**  $m/z$  calculated for  $C_{27}H_{20}N_3O_2^+$   $[M+H]^+$ : 418.1550, found 418.1555.

**(*S*)-2-(4-methoxyphenyl)-3'H-spiro[benzo[*e*]isoindole-1,4'-quinazolin]-3(2H)-one (5ad).**

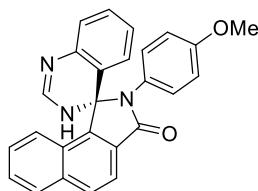

Colorless oil, 90% (36.5 mg) isolated yield,  $[\alpha]_D^{20} = -58.52$  ( $c = 1.0$  in  $CHCl_3$ ); 90% *ee*, determined by HPLC analysis (Chiralpak IC-3 column, *n*-hexane/*i*-PrOH = 70:30 (v/v), flow rate 0.8 mL/min,  $\lambda = 254$  nm, 25 °C),  $t_R$  (major) = 13.30 min;  $t_R$  (minor) = 20.59 min; **<sup>1</sup>H NMR (500 MHz, Chloroform-*d*)**  $\delta$  7.96 (d,  $J = 8.0$  Hz, 1H), 7.86 (d,  $J = 8.0$  Hz, 1H), 7.72-7.63 (m, 1H), 7.61-7.52 (m, 2H), 7.41 (t,  $J = 7.5$  Hz, 1H), 7.31 (s, 1H), 7.22 (t,  $J = 8.0$  Hz, 1H), 7.07-6.96 (m, 1H), 6.90 (t,  $J = 7.5$  Hz, 1H), 6.81-6.75 (m, 2H), 6.74-6.67 (m, 1H), 6.64 (d,  $J = 8.0$  Hz, 2H), 3.72 (s, 3H) ppm. **<sup>13</sup>C NMR (125 MHz, Chloroform-*d*)**  $\delta$  166.9, 146.4, 145.0, 138.7, 136.6, 131.9, 131.5, 130.1, 129.5, 128.8, 128.2, 128.0, 127.9, 127.1, 126.7, 126.2, 125.7, 124.5, 124.1, 120.4, 119.1, 78.3, 55.4 ppm. **HRMS (ESI)**  $m/z$  calculated for  $C_{26}H_{19}N_3O_2Na^+$   $[M+Na]^+$ : 428.1375, found 428.1371.

**(R)-2-(4-(Methylthio)phenyl)-3'H-spiro[benzo[e]isoindole-1,4'-quinazolin]-3(2H)-one (5ae).**

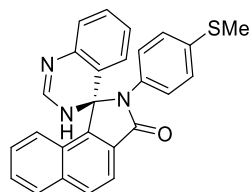

Colorless oil, 53% (22.3 mg) isolated yield,  $[\alpha]_D^{25} = +60.18$  ( $c = 1.0$  in  $\text{CHCl}_3$ ); 96% *ee*, determined by HPLC analysis (Chiralpak IC-3 column, *n*-hexane/*i*-PrOH, 70:30 v/v, flow rate 1.0 mL/min,  $\lambda = 254$  nm, 25 °C),  $t_R$  (major) = 17.47 min;  $t_R$  (minor) = 12.39 min;  $^1\text{H}$  NMR (500 MHz, Chloroform-*d*)  $\delta$  7.93 (d,  $J = 8.0$  Hz, 1H), 7.85 (d,  $J = 8.5$  Hz, 1H), 7.65 (d,  $J = 8.5$  Hz, 1H), 7.58-7.50 (m, 2H), 7.43-7.36 (m, 1H), 7.33 (s, 1H), 7.25-7.19 (m, 1H), 7.05-6.97 (m, 3H), 6.94-6.88 (m, 1H), 6.82-6.76 (m, 2H), 6.66-6.10 (m, 1H), 2.38 (s, 3H) ppm.  $^{13}\text{C}$  NMR (125 MHz, Chloroform-*d*)  $\delta$  166.9, 146.4, 145.0, 138.7, 136.6, 131.9, 131.5, 130.1, 129.5, 128.8, 128.2, 128.0, 127.9, 127.1, 126.7, 126.2, 125.7, 124.5, 124.1, 120.4, 119.1, 78.3, 15.6 ppm. HRMS (ESI)  $m/z$  calculated for  $\text{C}_{26}\text{H}_{19}\text{N}_3\text{OSNa}^+$   $[M+\text{Na}]^+$ : 444.1147, found 444.1145.

**(S)-3'-Acetyl-2-(4-vinylphenyl)-3'H-spiro[benzo[e]isoindole-1,4'-quinazolin]-3(2H)-one (5af).**

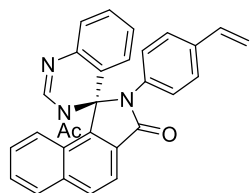

Colorless oil, 47% (20.8 mg) isolated yield,  $[\alpha]_D^{25} = -19.10$  ( $c = 0.8$  in  $\text{CHCl}_3$ ); 92% *ee*, determined by HPLC analysis (Chiralpak IA-3 column, *n*-hexane/*i*-PrOH, 50:50 v/v, flow rate 1.0 mL/min,  $\lambda = 254$  nm, 25 °C),  $t_R$  (major) = 23.09 min;  $t_R$  (minor) = 31.51 min;  $^1\text{H}$  NMR (500 MHz, Chloroform-*d*)  $\delta$  8.11-8.04 (m, 2H),  $\delta$  8.03-7.93 (m, 2H), 7.57-7.49 (m, 1H), 7.45-7.28 (m, 6H), 7.08-7.01 (m, 1H), 6.86-6.75 (m, 3H), 6.70-6.59 (m, 1H), 5.74-5.66 (m, 1H), 5.28-5.21 (m, 1H), 2.15 (s, 3H) ppm.  $^{13}\text{C}$  NMR (125 MHz, Chloroform-*d*)  $\delta$  169.5, 167.7, 145.3, 141.6, 138.6, 137.2, 136.5, 136.1, 134.6, 131.1, 130.4, 129.9, 129.8, 128.3, 128.0, 127.9, 127.3, 127.1, 126.9, 126.1, 126.1, 124.6, 122.7, 119.8, 114.8, 79.0, 23.9 ppm. HRMS (ESI)  $m/z$  calculated for  $\text{C}_{29}\text{H}_{21}\text{N}_3\text{O}_2\text{Na}^+$   $[M+\text{Na}]^+$ : 466.1531, found 466.1527.

**(R)-3'-Acetyl-2-(3,5-dimethylphenyl)-3'H-spiro[benzo[e]isoindole-1,4'-quinazolin]-3(2H)-one (5ag).**

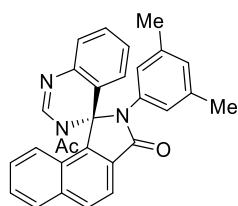

Colorless oil, 52% (23.1 mg) isolated yield,  $[\alpha]_D^{20} = +88.54$  ( $c = 1.0$  in  $\text{CHCl}_3$ ); 91% *ee*, determined by HPLC analysis (Chiralpak IC-3 column, *n*-hexane/*i*-PrOH = 40:60 (v/v), flow rate 0.5 mL/min,  $\lambda = 254$  nm, 25 °C),  $t_R$  (minor) = 21.01 min;  $t_R$  (major) = 36.23 min;  $^1\text{H}$  NMR (500 MHz,

**Chloroform-*d***)  $\delta$  8.11-8.05 (m, 2H), 8.00-7.94 (m, 2H), 7.54-7.51 (m, 1H), 7.42-7.33 (m, 4H), 7.06-7.02 (m, 1H), 6.92-6.85 (m, 1H), 6.75-6.73 (m, 1H), 6.38 (s, 2H), 2.16 (s, 6H), 2.15 (s, 3H) ppm.  **$^{13}\text{C}$  NMR (125 MHz, Chloroform-*d*)**  $\delta$  169.6, 167.5, 145.2, 141.6, 139.0, 138.9, 136.4, 134.6, 131.0, 130.4, 130.1, 130.0, 129.9, 128.2, 127.9, 127.8, 126.8, 126.1, 126.1, 124.9, 124.6, 122.7, 119.9, 78.9, 23.9, 21.4 ppm. **HRMS** (ESI)  $m/z$  calculated for  $\text{C}_{29}\text{H}_{23}\text{NaO}_2^+$   $[\text{M}+\text{Na}]^+$ : 468.1682, found 468.1682.

**(*S*)-3'-Acetyl-2-(benzo[d][1,3]dioxol-5-yl)-3'H-spiro[benzo[e]isoindole-1,4'-quinazolin]-3(2H)-one (5ah).**

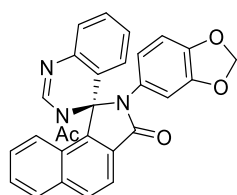

Colorless oil, 51% (23.4 mg) isolated yield,  $[\alpha]_{\text{D}}^{25} = -44.63$  ( $c = 1.0$  in  $\text{CHCl}_3$ ); 95% *ee*, determined by HPLC analysis (Chiralpak IA-3 column, *n*-hexane/*i*-PrOH, 50:50 v/v, flow rate 1.0 mL/min,  $\lambda = 254$  nm, 25 °C),  $t_{\text{R}}$  (major) = 20.56 min;  $t_{\text{R}}$  (minor) = 26.88 min;  **$^1\text{H}$  NMR (500 MHz, Chloroform-*d*)**

$\delta$  8.11-8.04 (m, 2H),  $\delta$  8.03-7.93 (m, 2H), 7.58-7.48 (m, 1H), 7.44-7.30 (m, 4H), 7.04 (t,  $J = 7.5$  Hz, 1H), 6.76-6.63 (m, 2H), 6.28-6.18 (m, 2H), 5.94 (s, 2H), 2.20 (s, 3H) ppm.  **$^{13}\text{C}$  NMR (125 MHz, Chloroform-*d*)**  $\delta$  169.6, 167.7, 148.3, 147.7, 145.0, 141.6, 138.8, 136.4, 131.0, 130.5, 129.9, 129.9, 128.3, 128.2, 127.9, 127.9, 127.0, 126.1, 126.0, 124.3, 122.7, 121.5, 119.9, 108.8, 108.7, 101.7, 78.9, 24.0 ppm. **HRMS** (ESI)  $m/z$  calculated for  $\text{C}_{28}\text{H}_{19}\text{N}_3\text{O}_4\text{Na}^+$   $[\text{M}+\text{Na}]^+$ : 484.1273, found 484.1271.

**(*R*)-4-(3'-Acetyl-3-oxo-3'H-spiro[benzo[e]isoindole-1,4'-quinazolin]-2(3H)-yl)benzaldehyde (5ai).**

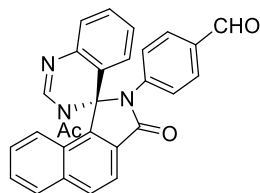

Yellow oil, 56% (22.4 mg) isolated yield, 90% *ee*, determined by HPLC analysis (Chiralpak IC-3 column, *n*-hexane/*i*-PrOH = 40:60 (v/v), flow rate 0.5 mL/min,  $\lambda = 254$  nm, 25 °C),  $t_{\text{R}}$  (minor) = 51.16 min;  $t_{\text{R}}$  (major) = 63.72 min;  **$^1\text{H}$  NMR (500 MHz, Chloroform-*d*)**  $\delta$  9.94 (s, 1H), 8.10-8.06

(m, 2H), 8.03-7.98 (m, 2H), 7.81-7.79 (m, 2H), 7.57-7.53 (m, 1H), 7.49-7.47 (m, 1H), 7.43-7.36 (m, 3H), 7.21-7.19 (m, 2H), 7.08-7.05 (m, 1H), 6.81-6.79 (m, 1H), 2.13 (s, 3H) ppm.  **$^{13}\text{C}$  NMR (125 MHz, Chloroform-*d*)**  $\delta$  191.3, 169.3, 167.9, 145.4, 141.5, 141.4, 138.3, 136.8, 134.6, 131.4, 130.8,

130.8, 130.1, 129.0, 128.7, 128.3, 128.2, 127.4, 126.0, 125.9, 125.6, 124.4, 122.6, 119.7, 79.2, 23.8 ppm. **HRMS** (ESI)  $m/z$  calculated for  $C_{28}H_{20}N_3O_3^+$   $[M+H]^+$ : 446.1499, found 446.1499.

**(R)-3'-acetyl-2-(4-chlorophenyl)-3'H-spiro[benzo[e]isoindole-1,4'-quinazolin]-3(2H)-one (5aj).**

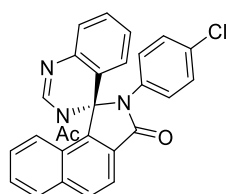

Yellow oil, 68% (30.7 mg) isolated yield,  $[\alpha]_D^{20} = +79.72$  ( $c = 1.0$  in  $CHCl_3$ ); 96% *ee*, determined by HPLC analysis (Chiralpak IA-3 column, *n*-hexane/*i*-PrOH = 50:50 (v/v), flow rate 0.8 mL/min,  $\lambda = 254$  nm, 25 °C),  $t_R$  (minor) = 31.69 min;  $t_R$  (major) = 40.80 min;  **$^1H$  NMR (500 MHz, Chloroform-*d*)**  $\delta$  8.08-8.04 (m, 2H), 7.99-7.98 (m, 2H), 7.55-7.52 (m, 1H), 7.44-7.34 (m, 4H), 7.25-7.23 (m, 2H), 7.07-7.04 (m, 1H), 6.80-6.75 (m, 3H), 2.16 (s, 3H) ppm.  **$^{13}C$  NMR (125 MHz, Chloroform-*d*)**  $\delta$  169.5, 167.7, 145.1, 141.5, 138.5, 136.6, 133.8, 133.8, 131.2, 130.6, 130.0, 129.7, 129.5, 128.5, 128.2, 128.1, 128.0, 127.2, 126.0, 124.3, 122.6, 119.7, 78.9, 23.8 ppm. **HRMS** (ESI)  $m/z$  calculated for  $C_{27}H_{19}ClN_3O_2^+$   $[M+H]^+$ : 452.1160, found 452.1156.

**(R)-3'-Acetyl-2-(4-fluorophenyl)-3'H-spiro[benzo[e]isoindole-1,4'-quinazolin]-3(2H)-one (5ak).**

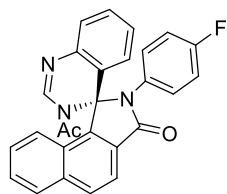

Yellow oil, 66% (28.9 mg) isolated yield,  $[\alpha]_D^{20} = +94.89$  ( $c = 1.0$  in  $CHCl_3$ ); 95% *ee*, determined by HPLC analysis (Chiralpak IC-3 column, *n*-hexane/*i*-PrOH = 50:50 (v/v), flow rate 0.8 mL/min,  $\lambda = 254$  nm, 25 °C),  $t_R$  (minor) = 13.02 min;  $t_R$  (major) = 31.20 min;  **$^1H$  NMR (500 MHz, Chloroform-*d*)**  $\delta$  8.09-8.06 (m, 2H), 8.00-7.97 (m, 2H), 7.56-7.51 (m, 1H), 7.42-7.34 (m, 4H), 7.08-7.04 (m, 1H), 6.99-6.94 (m, 2H), 6.81-6.75 (m, 3H), 2.17 (s, 3H) ppm.  **$^{19}F$  NMR (470 MHz, Chloroform-*d*)**  $\delta$  -112.68 ppm.  **$^{13}C$  NMR (125 MHz, Chloroform-*d*)**  $\delta$  169.6, 167.7, 163.1, 161.2, 145.0, 141.5, 138.7, 136.5, 131.1, 130.9, 130.9, 130.6, 130.0, 129.7, 129.2, 129.2, 128.5, 128.1, 128.0, 127.1, 126.1, 126.0, 124.3, 122.7, 119.8, 116.7, 116.5, 78.9, 23.9 ppm. **HRMS** (ESI)  $m/z$  calculated for  $C_{27}H_{19}N_3O_2^+$   $[M+H]^+$ : 436.1456, found 436.1465.

**(R)-3'-Acetyl-2-(4-(trifluoromethyl)phenyl)-3'H-spiro[benzo[e]isoindole-1,4'-quinazolin]-3(2H)-one (5al).**

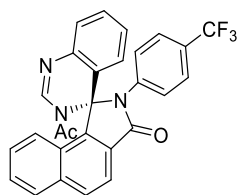

Yellow oil, 46% (22.4 mg) isolated yield,  $[\alpha]_D^{20} = +101.93$  ( $c = 1.0$  in  $\text{CHCl}_3$ ); 95% *ee*, determined by HPLC analysis (Chiralpak IC-3 column, *n*-hexane/*i*-PrOH = 50:50 (v/v), flow rate 0.8 mL/min,  $\lambda = 254$  nm, 25 °C),  $t_R$  (minor) = 8.36 min;  $t_R$  (major) = 15.41 min;  **$^1\text{H}$  NMR (500 MHz, Chloroform-*d*)**  $\delta$  8.09-8.06 (m, 2H), 8.02-7.98 (m, 2H), 7.56-7.53 (m, 3H), 7.48-7.46 (m, 1H), 7.43-7.36 (m, 3H), 7.09-7.05 (m, 3H), 6.81-6.79 (m, 1H), 2.15 (s, 3H) ppm.  **$^{19}\text{F}$  NMR (470 MHz, Chloroform-*d*)**  $\delta$  -62.60 ppm.  **$^{13}\text{C}$  NMR (125 MHz, Chloroform-*d*)**  $\delta$  169.4, 167.8, 145.2, 141.5, 138.9, 138.4, 136.7, 131.3, 130.7, 130.0, 129.5, 129.2, 128.6, 128.2, 128.1, 127.3, 126.6 (q,  $J = 3.7$  Hz), 126.1, 126.0, 126.0, 125.0, 124.3, 122.8, 122.5, 119.7, 79.0, 23.8 ppm. **HRMS (ESI)**  $m/z$  calculated for  $\text{C}_{28}\text{H}_{19}\text{F}_3\text{N}_3\text{O}_2^+$   $[\text{M}+\text{H}]^+$ : 486.1424, found 486.1424.

**(R)-4-(3'-Acetyl-3-oxo-3'H-spiro[benzo[e]isoindole-1,4'-quinazolin]-2(3H)-yl)benzonitrile (5am).**

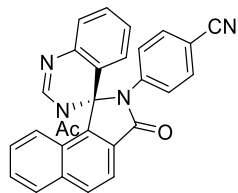

Yellow oil, 59% (27.1 mg) isolated yield,  $[\alpha]_D^{20} = +13.76$  ( $c = 1.0$  in  $\text{CHCl}_3$ ); 93% *ee*, determined by HPLC analysis (Chiralpak IC-3 column, *n*-hexane/*i*-PrOH = 50:50 (v/v), flow rate 0.8 mL/min,  $\lambda = 254$  nm, 25 °C),  $t_R$  (minor) = 37.12 min;  $t_R$  (major) = 47.55 min;  **$^1\text{H}$  NMR (500 MHz, Chloroform-*d*)**  $\delta$  8.09-8.05 (m, 3H), 8.00-7.98 (m, 1H), 7.57-7.53 (m, 3H), 7.50-7.48 (m, 1H), 7.43-7.36 (m, 3H), 7.17-7.15 (m, 2H), 7.07-7.04 (m, 1H), 6.79-6.77 (m, 1H), 2.14 (s, 3H) ppm.  **$^{13}\text{C}$  NMR (125 MHz, Chloroform-*d*)**  $\delta$  169.3, 167.8, 145.2, 141.5, 140.1, 138.2, 136.8, 133.3, 131.5, 130.8, 130.1, 128.8, 128.7, 128.3, 128.3, 127.4, 125.9, 125.8, 125.5, 124.2, 122.5, 119.6, 118.4, 110.5, 79.1, 23.8 ppm. **HRMS (ESI)**  $m/z$  calculated for  $\text{C}_{28}\text{H}_{18}\text{N}_4\text{O}_2^+$   $[\text{M}+\text{H}]^+$ : 443.1503, found 443.1505.

**(R)-3'-Acetyl-2-(4-acetylphenyl)-3'H-spiro[benzo[e]isoindole-1,4'-quinazolin]-3(2H)-one**  
**(5an).**

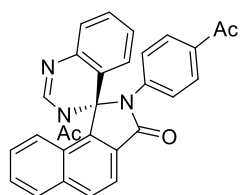

Yellow oil, 53% (24.4 mg) isolated yield,  $[\alpha]_D^{20} = +13.15$  ( $c = 1.0$  in  $\text{CHCl}_3$ ); 94% *ee*, determined by HPLC analysis (Chiralpak IC-3 column, *n*-hexane/*i*-PrOH = 40:60 (v/v), flow rate 0.5 mL/min,  $\lambda = 254$  nm, 25 °C),  $t_R$  (minor) = 58.68 min;  $t_R$  (major) = 92.94 min;  $^1\text{H NMR}$  (500 MHz, Chloroform-*d*)  $\delta$  8.09-8.05 (m, 2H), 8.02-7.97 (m, 2H), 7.89-7.84 (m, 2H), 7.56-7.52 (m, 1H), 7.47-7.45 (m, 1H), 7.42-7.35 (m, 3H), 7.10-7.04 (m, 3H), 6.81-6.79 (m, 1H), 2.59 (s, 3H), 2.13 (s, 3H) ppm.  $^{13}\text{C NMR}$  (125 MHz, Chloroform-*d*)  $\delta$  197.3, 169.4, 167.8, 145.3, 141.6, 140.1, 138.4, 136.7, 135.6, 131.3, 130.7, 130.0, 129.6, 129.1, 128.6, 128.2, 128.1, 127.3, 126.0, 126.0, 125.5, 124.4, 122.6, 119.7, 79.1, 26.7, 23.8 ppm. HRMS (ESI)  $m/z$  calculated for  $\text{C}_{29}\text{H}_{22}\text{N}_3\text{O}_3^+$   $[\text{M}+\text{H}]^+$ : 460.1656, found 460.1569.

**Methyl-(S)-4-(3'-acetyl-3-oxo-3'H-spiro[benzo[e]isoindole-1,4'-quinazolin]-2(3H)yl)benzoate**  
**(5ao).**

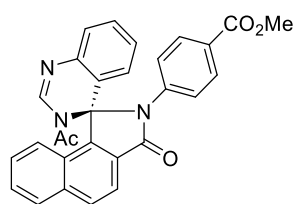

Colorless oil, 77% (36.6 mg) isolated yield,  $[\alpha]_D^{25} = -28.93$  ( $c = 1.0$  in  $\text{CHCl}_3$ ); 96% *ee*, determined by HPLC analysis (Chiralpak IA-3 column, *n*-hexane/*i*-PrOH, 50:50 v/v, flow rate 1.0 mL/min,  $\lambda = 254$  nm, 25 °C),  $t_R$  (major) = 16.82 min;  $t_R$  (minor) = 20.44 min;  $^1\text{H NMR}$  (500 MHz, Chloroform-*d*)  $\delta$  8.10-8.03 (m, 2H),  $\delta$  8.02-7.88 (m, 4H), 7.56-7.49 (m, 1H), 7.47-7.42 (m, 1H), 7.42-7.31 (m, 3H), 7.08-6.98 (m, 3H), 6.81-6.74 (m, 1H), 3.87 (s, 3H), 2.12 (s, 3H) ppm.  $^{13}\text{C NMR}$  (125 MHz, Chloroform-*d*)  $\delta$  169.3, 167.8, 166.4, 145.3, 141.5, 139.9, 138.3, 136.6, 131.2, 130.8, 130.6, 130.0, 129.1, 128.8, 128.5, 128.1, 128.0, 127.2, 126.0, 125.9, 125.5, 124.3, 122.5, 119.6, 79.0, 52.3, 23.7 ppm. HRMS (ESI)  $m/z$  calculated for  $\text{C}_{29}\text{H}_{21}\text{N}_3\text{O}_4\text{Na}^+$   $[\text{M}+\text{Na}]^+$ : 498.1430, found 498.1425.

**(S)-3'-acetyl-2-(4-bromophenyl)-3'H-spiro[benzo[e]isoindole-1,4'-quinazolin]-3(2H)-one (5ap).**

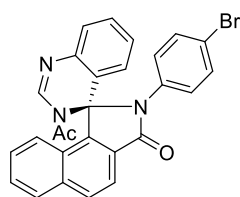

Colorless oil, 77% (36.6 mg) isolated yield,  $[\alpha]_D^{25} = -49.35$  ( $c = 1.0$  in  $\text{CHCl}_3$ ); 94% *ee*, determined by HPLC analysis (Chiralpak IC-3 column, *n*-hexane/*i*-PrOH, 50:50 v/v, flow rate 1.0 mL/min,  $\lambda = 254$  nm, 25 °C),  $t_R$  (major) = 8.17 min;  $t_R$  (minor) = 20.91 min;  **$^1\text{H}$  NMR (500 MHz, Chloroform-*d*)**  $\delta$  8.10-8.04 (m, 2H),  $\delta$  8.02-7.95 (m, 2H), 7.57-7.50 (m, 1H), 7.46-7.33 (m, 6H), 7.08-7.02 (m, 1H), 6.80-6.70 (m, 3H), 2.17 (s, 3H) ppm.  **$^{13}\text{C}$  NMR (125 MHz, Chloroform-*d*)**  $\delta$  169.5, 167.6, 145.1, 141.5, 138.5, 136.6, 134.3, 132.7, 131.2, 130.6, 130.0, 129.5, 128.5, 128.4, 128.0, 128.0, 127.2, 126.0, 126.0, 124.3, 122.6, 121.9, 119.7, 78.9, 23.9 ppm. **HRMS** (ESI)  $m/z$  calculated for  $\text{C}_{27}\text{H}_{18}\text{N}_3\text{O}_2\text{BrNa}^+$   $[\text{M}+\text{Na}]^+$ : 518.0480, found 518.0481.

**(1R,2S,5R)- 2-Isopropyl-5-methylcyclohexyl 4-((S)-3'-acetyl-3-oxo-3'H- spiro[benzo[e]isoindole-1,4'-quinazolin]- 2(3H)- yl)benzoate (5aq).**

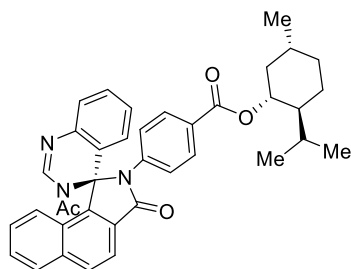

Colorless oil, 62% (37.1 mg) isolated yield,  $[\alpha]_D^{20} = -77.42$  ( $c = 1.0$  in  $\text{CHCl}_3$ ); 94% *ee*, determined by HPLC analysis (Chiralpak IC-3 column, *n*-hexane/*i*-PrOH = 50:50 (v/v), flow rate 0.7 mL/min,  $\lambda = 254$  nm, 25 °C),  $t_R$  (major) = 13.50 min;  $t_R$  (minor) = 36.95 min;  **$^1\text{H}$  NMR (500 MHz, Chloroform-*d*)**  $\delta$  8.07-8.04 (m, 3H), 7.99-7.94 (m, 3H), 7.54-7.51 (m, 1H), 7.46-7.45 (m, 1H), 7.41-7.34 (m, 3H), 7.06-7.02 (m, 3H), 6.79 (d,  $J = 8.0$  Hz, 1H), 4.92-4.87 (m, 1H), 2.14 (s, 3H), 2.11-2.07 (m, 1H), 1.94-1.88 (m, 1H), 1.74-1.69 (m, 2H), 1.57-1.48 (m, 2H), 1.30-1.23 (m, 1H), 1.15-1.03 (m, 2H), 0.92-0.88 (m, 6H), 0.77 (d,  $J = 6.0$  Hz, 3H) ppm.  **$^{13}\text{C}$  NMR (125 MHz, Chloroform-*d*)**  $\delta$  169.4, 167.7, 165.5, 145.3, 141.7, 139.6, 138.3, 136.6, 131.2, 130.8, 130.6, 130.0, 129.7, 129.2, 128.5, 128.1, 128.0, 127.2, 126.0, 126.0, 125.6, 124.4, 122.5, 119.7, 79.0, 75.1, 47.3, 41.0, 34.4, 31.5, 26.5, 23.8, 23.7, 22.1, 20.9, 16.6 ppm. **HRMS** (ESI)  $m/z$  calculated for  $\text{C}_{38}\text{H}_{38}\text{N}_3\text{O}_4^+$   $[\text{M}+\text{H}]^+$ : 600.2857, found 600.2857.

(3aR,5R,6S,6aR)-5-((R)-2,2-dimethyl-1,3-dioxolan-4-yl)-2,2-dimethyltetrahydrofuro[2,3-d][1,3]dioxol-6-yl 4-((S)-3'-acetyl-3-oxo-3'H-spiro[benzo[e]isoindole-1,4'-quinazolin]-2(3H)-yl)benzoate (5ar).

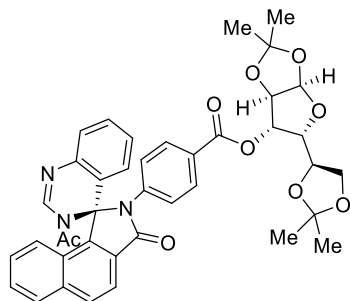

Colorless oil, 46% (31.7 mg) isolated yield,  $[\alpha]_D^{20} = -13.79$  ( $c = 1.0$  in  $\text{CHCl}_3$ ); 95% *ee*, determined by HPLC analysis (Chiralpak IC-3 column, *n*-hexane/*i*-PrOH = 50:50 (v/v), flow rate 0.7 mL/min,  $\lambda = 254$  nm, 25 °C),  $t_R$  (major) = 29.41 min;  $t_R$  (minor) = 90.36 min;  $^1\text{H NMR}$  (500 MHz, Chloroform-*d*)  $\delta$  8.09-8.05 (m, 2H), 8.01-7.98 (m, 2H), 7.94-7.92 (m, 2H), 7.59-7.52 (m, 1H), 7.49-7.46 (m, 1H), 7.41-7.36 (m, 3H), 7.08-7.06 (m, 3H), 6.80-6.78 (m, 1H), 5.93-5.92 (m, 1H), 5.47-5.46 (m, 1H), 4.59 (d,  $J = 4.5$  Hz, 1H), 4.33-4.28 (m, 2H), 4.14-4.04 (m, 2H), 2.13 (s, 3H), 1.54 (s, 3H), 1.40 (s, 3H), 1.31 (s, 3H), 1.25 (s, 3H) ppm.  $^{13}\text{C NMR}$  (125 MHz, Chloroform-*d*)  $\delta$  169.3, 167.8, 164.6, 145.3, 141.5, 140.5, 138.4, 136.7, 131.4, 130.9, 130.7, 130.6, 130.0, 129.1, 128.6, 128.2, 128.1, 128.1, 127.4, 126.0, 126.0, 125.6, 124.4, 122.6, 119.7, 112.5, 109.6, 105.2, 83.5, 80.0, 79.1, 72.6, 67.4, 27.0, 26.9, 26.3, 25.4, 23.8 ppm. HRMS (ESI)  $m/z$  calculated for  $\text{C}_{40}\text{H}_{38}\text{N}_3\text{O}_9^+$   $[\text{M}+\text{H}]^+$ : 704.2603, found 704.2601.

(S)-3'-Acetyl-2-(*p*-tolyl)-3'H-spiro[benzo[e]isoindole-1,4'-quinazolin]-3(2H)-one (5ba).

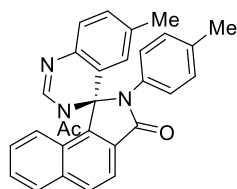

Colorless oil, 58% (25.0 mg) isolated yield,  $[\alpha]_D^{25} = -81.51$  ( $c = 1.0$  in  $\text{CHCl}_3$ ); 95% *ee*, determined by HPLC analysis (Chiralpak IA-3 column, *n*-hexane/*i*-PrOH=50:50 v/v, flow rate 1.0 mL/min,  $\lambda = 254$  nm, 25 °C),  $t_R$  (major) = 14.47 min;  $t_R$  (minor) = 27.18 min;  $^1\text{H NMR}$  (500 MHz, Chloroform-*d*)  $\delta$  8.12-8.03 (m, 2H), 7.98 (d,  $J = 8.0$  Hz, 1H), 7.92 (s, 1H), 7.56-7.49 (m, 1H), 7.44-7.34 (m, 2H), 7.32-7.27 (m, 1H), 7.17-7.11 (m, 1H), 7.06 (d,  $J = 8.0$  Hz, 2H), 6.70 (d,  $J = 8.0$  Hz, 2H), 6.58-6.54 (m, 1H), 2.29 (s, 3H), 2.13 (s, 3H), 2.09 (s, 3H) ppm.  $^{13}\text{C NMR}$  (125 MHz, Chloroform-*d*)  $\delta$  169.5, 167.7, 145.2, 140.8, 138.3, 138.0, 136.4, 136.4, 132.2, 131.3, 130.9, 130.1, 129.9, 129.8, 127.8, 127.8, 126.9, 126.8, 126.1, 126.1, 124.1, 122.7, 119.9, 78.9, 23.9, 21.4, 21.2 ppm. HRMS (ESI)  $m/z$  calculated for  $\text{C}_{29}\text{H}_{24}\text{N}_3\text{O}_2^+$   $[\text{M}+\text{H}]^+$ : 446.1869, found 446.1912.



**(R)-7'-Fluoro-2-(p-tolyl)-3'H-spiro[benzo[e]isoindole-1,4'-quinazolin]-3(2H)-one (5ca).**

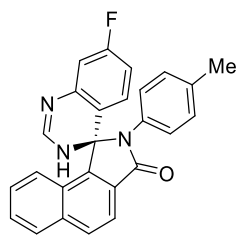

Colorless oil, 56% (22.8 mg, contains 5% of impurities that cannot be separated) isolated yield,  $[\alpha]_D^{25} = +49.80$  ( $c = 1.0$  in  $\text{CHCl}_3$ ); 95% *ee*, determined by HPLC analysis (Chiralpak OD-3 column, *n*-hexane/*i*-PrOH, 90:10 v/v, flow rate 1.0 mL/min,  $\lambda = 254$  nm, 25 °C),  $t_R$  (major) = 25.31 min;  $t_R$  (minor) = 22.65 min;  $^1\text{H}$  NMR (500 MHz, Chloroform-*d*)  $\delta$  7.92 (d,  $J = 8.0$  Hz, 1H), 7.79 (d,  $J = 8.5$  Hz, 1H), 7.62-7.48 (m, 2H), 7.47-7.36 (m, 2H), 7.02 (s, 1H), 6.98-6.92 (m, 2H), 6.72-6.66 (m, 2H), 6.64-6.46 (m, 3H), 2.24 (s, 3H) ppm.  $^{19}\text{F}$  NMR (470 MHz, Chloroform-*d*)  $\delta$  -110.75 ppm.  $^{13}\text{C}$  NMR (125 MHz, Chloroform-*d*)  $\delta$  166.9, 164.1, 162.2, 145.8, 138.3, 136.5, 131.9, 131.5, 129.9, 129.6, 129.4, 128.5, 128.1, 128.1, 127.9, 124.0, 120.0, 119.0, 112.89 (d,  $J = 23.0$  Hz), 77.9, 21.2 ppm. HRMS (ESI)  $m/z$  calculated for  $\text{C}_{26}\text{H}_{19}\text{FN}_3\text{O}^+$   $[\text{M}+\text{H}]^+$ : 408.1507, found 408.1503.

**(R)-7'-Chloro-2-(p-tolyl)-3'H-spiro[benzo[e]isoindole-1,4'-quinazolin]-3(2H)-one (5da).**

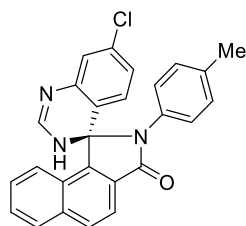

White solid, 75% (31.9 mg) isolated yield,  $[\alpha]_D^{25} = +57.95$  ( $c = 1.0$  in  $\text{CHCl}_3$ ); 90% *ee*, determined by HPLC analysis (Chiralpak OD-3 column, *n*-hexane/*i*-PrOH, 90:10 v/v, flow rate 1.0 mL/min,  $\lambda = 254$  nm, 25 °C),  $t_R$  (major) = 16.85 min;  $t_R$  (minor) = 14.56 min;  $^1\text{H}$  NMR (500 MHz, Chloroform-*d*)  $\delta$  7.93 (d,  $J = 8.5$  Hz, 1H), 7.81 (d,  $J = 8.0$  Hz, 1H), 7.60-7.50 (m, 2H), 7.49-7.39 (m, 2H), 7.12 (s, 1H), 7.02-6.94 (m, 3H), 6.85-6.81 (m, 1H), 6.75-6.69 (m, 2H), 6.49 (d,  $J = 8.5$  Hz, 1H), 2.26 (s, 3H) ppm.  $^{13}\text{C}$  NMR (125 MHz, Chloroform-*d*)  $\delta$  166.8, 145.8, 138.3, 136.4, 135.3, 131.7, 131.5, 129.9, 129.4, 128.4, 128.1, 128.0, 127.9, 127.3, 126.9, 125.6, 123.9, 119.1, 118.9, 21.2 ppm. HRMS (ESI)  $m/z$  calculated for  $\text{C}_{26}\text{H}_{19}\text{ClN}_3\text{O}^+$   $[\text{M}+\text{H}]^+$ : 424.1211, found 424.1208.

**(S)-3'-Acetyl- 2-(p-tolyl)- 7'-(trifluoromethyl)- 3'H-spiro[benzo[e]isoindole-1,4'- quinazolin]-3(2H)-one (5ea).**

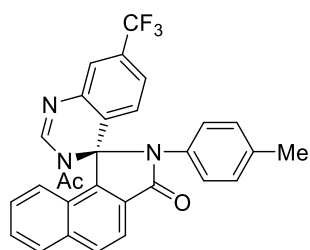

Colorless oil, 44% (22.0 mg) isolated yield,  $[\alpha]_D^{20} = -37.60$  ( $c = 1.0$  in  $\text{CHCl}_3$ ); 90% *ee*, determined by HPLC analysis (Chiralpak IC-3 column, *n*-hexane/*i*-PrOH = 50:50 (v/v), flow rate 0.8 mL/min,  $\lambda = 254$  nm, 25 °C),  $t_R$  (major) = 11.46 min;  $t_R$  (minor) = 31.48 min;  $^1\text{H}$

**NMR (500 MHz, Chloroform-*d*)**  $\delta$  8.11-8.07 (m, 2H), 8.04 (s, 1H), 8.01 (d,  $J$  = 8.0 Hz, 1H), 7.66 (s, 1H), 7.57-7.54 (m, 1H), 7.43-7.40 (m, 1H), 7.33 (d,  $J$  = 8.5 Hz, 1H), 7.27-7.25 (m, 1H), 7.10-7.09 (m, 2H), 6.88 (d,  $J$  = 8.5 Hz, 1H), 6.68-6.67 (m, 2H), 2.31 (s, 3H), 2.18 (s, 3H) ppm.  **$^{19}\text{F}$  NMR (470 MHz, Chloroform-*d*)**  $\delta$  -63.01 ppm.  **$^{13}\text{C}$  NMR (125 MHz, Chloroform-*d*)**  $\delta$  169.5, 167.6, 144.8, 143.0, 139.4, 138.6, 136.5, 132.6 (q,  $J$  = 34.0 Hz), 131.9, 131.4, 130.4, 130.1, 129.9, 128.3, 128.3, 128.1, 127.1, 127.0, 126.0, 124.5 (q,  $J$  = 3.8 Hz), 124.1 (q,  $J$  = 3.8 Hz), 122.3, 119.9, 78.5, 23.9, 21.3 ppm. **HRMS** (ESI)  $m/z$  calculated for  $\text{C}_{29}\text{H}_{21}\text{F}_3\text{N}_3\text{O}_2^+$   $[\text{M}+\text{H}]^+$ : 500.1580, found 500.1583.

**(*R*)-6'-Fluoro-2-(*p*-tolyl)-3'H-spiro[benzo[*e*]isoindole-1,4'-quinazolin]-3(2H)-one (5fa).**

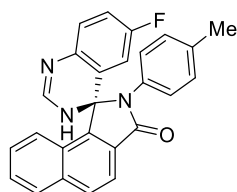

Colorless oil, 46% (18.9 mg) isolated yield,  $[\alpha]_{\text{D}}^{25} = +37.31$  ( $c$  = 1.0 in  $\text{CHCl}_3$ ); 92% *ee*, determined by HPLC analysis (Chiralpak IA-3 column, *n*-hexane/*i*-PrOH, 85:15 v/v, flow rate 1.0 mL/min,  $\lambda$  = 254 nm, 25 °C),  $t_{\text{R}}$  (major) = 32.19 min;  $t_{\text{R}}$  (minor) = 42.23 min;  **$^1\text{H}$  NMR (500 MHz, Chloroform-*d*)**  $\delta$  7.96 (d,  $J$  = 8.0 Hz, 1H), 7.81 (d,  $J$  = 8.0 Hz, 1H), 7.62-7.55 (m, 1H), 7.55-7.47 (m, 2H), 7.46-7.37 (m, 1H), 7.16 (s, 1H), 7.05-6.94 (m, 3H), 6.94-6.86 (m, 1H), 6.75-6.70 (m, 2H), 6.30-6.24 (m, 1H), 2.27 (s, 3H) ppm.  **$^{19}\text{F}$  NMR (470 MHz, Chloroform-*d*)**  $\delta$  -115.42 ppm.  **$^{13}\text{C}$  NMR (125 MHz, Chloroform-*d*)**  $\delta$  166.7, 161.1, 159.1, 145.4, 144.7, 138.3, 136.6, 131.8, 131.7, 129.9, 129.5, 128.4, 128.2, 128.2, 128.0, 127.0, 124.0, 118.9, 117.6 (d,  $J$  = 22.6 Hz), 112.0 (d,  $J$  = 23.5 Hz), 77.7, 21.3 ppm. **HRMS** (ESI)  $m/z$  calculated for  $\text{C}_{26}\text{H}_{18}\text{N}_3\text{OFNa}^+$   $[\text{M}+\text{Na}]^+$ : 430.1332, found 430.1334.

**(*S*)-6'-Chloro-2-(*p*-tolyl)-3'H-spiro[benzo[*e*]isoindole-1,4'-quinazolin]-3(2H)-one (5ga).**

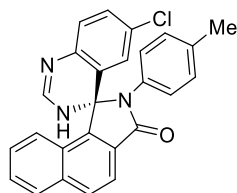

Colorless oil, 71% (30.3 mg) isolated yield,  $[\alpha]_{\text{D}}^{25} = -63.97$  ( $c$  = 1.0 in  $\text{CHCl}_3$ ); 88% *ee*, determined by HPLC analysis (Chiralpak IA-3 column, hexane/*i*-PrOH, 80:20 v/v, flow rate 1.0 mL/min,  $\lambda$  = 254 nm, 25 °C),  $t_{\text{R}}$  (major) = 26.10 min;  $t_{\text{R}}$  (minor) = 16.38 min;  **$^1\text{H}$  NMR (500 MHz, Chloroform-*d*)**  $\delta$  8.03-7.93 (m, 1H), 7.86-7.76 (m, 1H), 7.65-7.54 (m, 1H), 7.53-7.32 (m, 3H), 7.19-7.04 (m, 2H), 7.02-6.80 (m, 3H), 6.78-6.64 (m, 2H), 6.61-6.52 (m, 1H), 2.26 (s, 3H) ppm.  **$^{13}\text{C}$  NMR (125 MHz, Chloroform-*d*)**  $\delta$  166.7, 145.2, 138.2, 136.5, 131.7, 131.7, 130.2, 130.1, 129.9, 129.4,

128.8, 128.6, 128.4, 128.1, 128.0, 127.9, 126.9, 125.5, 123.9, 118.8, 77.5, 21.2 ppm. **HRMS** (ESI)  $m/z$  calculated for  $C_{26}H_{19}N_3OCl^+$   $[M+H]^+$ : 424.1217, found 424.1220.

**(S)-3'-Acetyl- 8'-methyl- 2-(p-tolyl)-3'H-spiro[benzo[e]isoindole- 1,4'-quinazolin]- 3(2H)- one (5ha).**

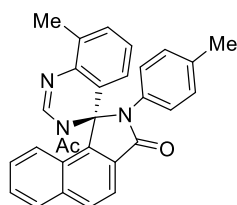

Yellow oil, 59% (26.3 mg) isolated yield,  $[\alpha]_D^{20} = -62.33$  ( $c = 1.0$  in  $CHCl_3$ ); 92% *ee*, determined by HPLC analysis (Chiralpak OD-3 column, *n*-hexane/*i*-PrOH = 70:30 (v/v), flow rate 1.0 mL/min,  $\lambda = 254$  nm, 25 °C),  $t_R$  (minor) = 8.20 min;  $t_R$  (major) = 28.54 min;  **$^1H$  NMR (500 MHz, Chloroform-*d*)**  $\delta$  8.08-8.04 (m, 2H), 8.01 (s, 1H), 7.97 (d,  $J = 8.5$  Hz, 1H), 7.53-7.50 (m, 1H), 7.42-7.36 (m, 2H), 7.19 (d,  $J = 7.5$  Hz, 1H), 7.07-7.05 (m, 2H), 6.93-6.90 (m, 1H), 6.69-6.67 (m, 2H), 6.59 (d,  $J = 8.0$  Hz, 1H), 2.51 (s, 3H), 2.30 (s, 3H), 2.14 (s, 3H) ppm.  **$^{13}C$  NMR (125 MHz, Chloroform-*d*)**  $\delta$  169.6, 167.7, 145.4, 140.5, 138.1, 137.1, 136.4, 135.0, 132.3, 131.6, 130.8, 130.2, 130.0, 129.9, 127.8, 127.7, 127.6, 127.2, 126.2, 124.3, 123.8, 122.8, 119.9, 79.0, 23.8, 21.3, 17.6 ppm. **HRMS** (ESI)  $m/z$  calculated for  $C_{29}H_{24}N_3O_2^+$   $[M+H]^+$ : 446.1863, found 446.1864.

**(R)-8-Methoxy- 2-(p-tolyl)- 3'H- spiro[benzo[e]isoindole- 1,4'- quinazolin]- 3(2H)-one (5ja).**

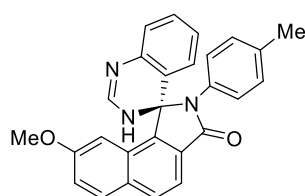

Yellow oil, 60% (25.0 mg) isolated yield,  $[\alpha]_D^{20} = -47.46$  ( $c = 1.0$  in  $CHCl_3$ ); 94% *ee*, determined by HPLC analysis (Chiralpak IC-3 column, *n*-hexane/*i*-PrOH = 50:50 (v/v), flow rate 0.8 mL/min,  $\lambda = 254$  nm, 25 °C),  $t_R$  (minor) = 8.75 min;  $t_R$  (major) = 13.81 min;  **$^1H$  NMR (500 MHz, Chloroform-*d*)**  $\delta$  7.83-7.80 (m, 2H), 7.57 (d,  $J = 8.0$  Hz, 1H), 7.24-7.16 (m, 3H), 7.05-7.03 (m, 1H), 6.98-6.97 (m, 2H), 6.92-6.89 (m, 1H), 6.80-6.78 (m, 2H), 6.71-6.67 (m, 2H), 3.56 (s, 3H), 2.26 (s, 3H) ppm.  **$^{13}C$  NMR (125 MHz, Chloroform-*d*)**  $\delta$  167.2, 158.6, 145.0, 137.8, 132.4, 132.0, 130.9, 130.8, 130.0, 129.9, 128.5, 128.2, 128.2, 126.3, 125.7, 120.8, 116.9, 101.9, 78.0, 55.2, 21.3 ppm. **HRMS** (ESI)  $m/z$  calculated for  $C_{27}H_{22}N_3O_2^+$   $[M+H]^+$ : 420.1707, found 420.1704.

**(R)-3-Oxo- 2- (p-tolyl)- 2,3-dihydro-3'H-spiro[benzo[e]isoindole- 1,4'-quinazoline]-7-carbonitrile (5ka).**

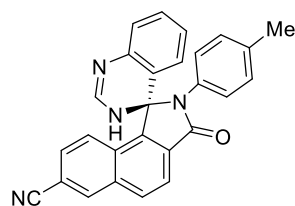

Colorless oil, 50% (20.6 mg) isolated yield,  $[\alpha]_D^{20} = -8.27$  ( $c = 1.0$  in  $\text{CHCl}_3$ ); 85% *ee*, determined by HPLC analysis (Chiralpak IC-3 column, *n*-hexane/*i*-PrOH = 50:50 (v/v), flow rate 0.8 mL/min,  $\lambda = 254$  nm, 25 °C),  $t_R$  (minor) = 16.40 min;  $t_R$  (major) = 33.84 min;  $^1\text{H NMR}$  (500 MHz, Chloroform-*d*)  $\delta$  8.34-8.32 (m, 1H), 8.06-7.97 (m, 2H), 7.63-7.60 (m, 1H), 7.52-7.49 (m, 1H), 7.24-7.19 (m, 2H), 7.02-6.87 (m, 4H), 6.75-6.73 (m, 2H), 6.64-6.61 (m, 1H), 2.25 (s, 3H) ppm.  $^{13}\text{C NMR}$  (125 MHz, Chloroform-*d*)  $\delta$  166.1, 145.0, 138.3, 135.3, 135.3, 135.3, 135.2, 132.1, 131.6, 131.3, 131.3, 130.2, 129.9, 128.7, 128.7, 128.5, 128.1, 126.4, 125.5, 121.5, 121.5, 118.6, 111.3, 78.8, 21.3 ppm. HRMS (ESI)  $m/z$  calculated for  $\text{C}_{27}\text{H}_{19}\text{N}_4\text{O}^+$   $[\text{M}+\text{H}]^+$ : 415.1553, found 415.1557.

**(S)-Methyl-3-oxo-2-(p-tolyl)-2,3-dihydro-3'H-spiro[benzo[e]isoindole-1,4'-quinazoline]-7-carboxylate (5la).**

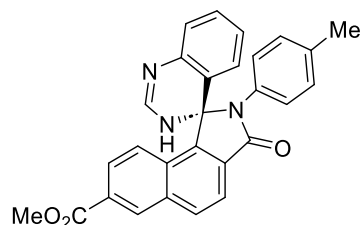

Colorless oil, 83% (37.3 mg) isolated yield,  $[\alpha]_D^{20} = +9.50$  ( $c = 1.0$  in  $\text{CHCl}_3$ ); 91% *ee*, determined by HPLC analysis (Chiralpak IC-3 column, *n*-hexane/*i*-PrOH = 50:50 (v/v), flow rate 0.8 mL/min,  $\lambda = 254$  nm, 25 °C),  $t_R$  (major) = 14.04 min;  $t_R$  (major) = 22.87 min;  $^1\text{H NMR}$  (500 MHz, Chloroform-*d*)  $\delta$  8.59 (s, 1H), 7.99 (d,  $J = 8.5$  Hz, 1H), 7.88 (d,  $J = 8.5$  Hz, 1H), 7.80 (d,  $J = 8.5$  Hz, 1H), 7.50 (d,  $J = 8.5$  Hz, 1H), 7.26-7.18 (m, 2H), 7.00-6.87 (m, 4H), 6.77-6.75 (m, 2H), 6.59 (d,  $J = 7.5$  Hz, 1H), 3.96 (s, 3H), 2.26 (s, 3H) ppm.  $^{13}\text{C NMR}$  (125 MHz, Chloroform-*d*)  $\delta$  166.7, 166.4, 146.4, 145.1, 138.2, 135.6, 132.6, 132.1, 1312.0, 130.4, 130.1, 129.9, 129.6, 129.3, 129.0, 128.5, 127.0, 126.2, 125.6, 124.4, 120.1, 78.4, 52.7, 21.3 ppm. HRMS (ESI)  $m/z$  calculated for  $\text{C}_{28}\text{H}_{22}\text{N}_3\text{O}_3^+$   $[\text{M}+\text{H}]^+$ : 448.1656, found 448.1658.

**(S)-7-Methoxy-2-(p-tolyl)-3'H- spiro[benzo[e]isoindole-1,4'-quinazolin]-3(2H)- one (5ma).**

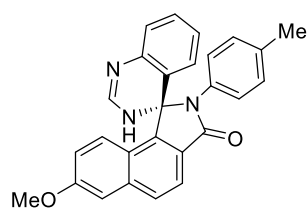

Colorless oil, 79% (32.9 mg) isolated yield,  $[\alpha]_D^{20} = +18.08$  ( $c = 1.0$  in  $\text{CHCl}_3$ ); 89% *ee*, determined by HPLC analysis (Chiralpak IC-3 column, *n*-hexane/*i*-PrOH = 50:50 (v/v), flow rate 0.8 mL/min,  $\lambda = 254$  nm, 25 °C),  $t_R(\text{minor}) = 10.17$  min;  $t_R(\text{major}) = 16.23$  min;  $^1\text{H}$  NMR (500 MHz, Chloroform-*d*)  $\delta$  7.83 (d,  $J = 8.5$  Hz, 1H), 7.76 (d,  $J = 8.0$  Hz, 1H), 7.44 (d,  $J = 9.5$  Hz, 1H), 7.24-7.24 (m, 1H), 7.20-7.17 (m, 1H), 7.09-7.04 (m, 2H), 6.97-6.87 (m, 4H), 6.67-6.63 (m, 3H), 3.91 (s, 3H), 2.24 (s, 3H) ppm.  $^{13}\text{C}$  NMR (125 MHz, Chloroform-*d*)  $\delta$  167.0, 159.1, 145.0, 138.4, 137.9, 132.3, 130.0, 129.9, 129.8, 129.5, 128.4, 126.3, 126.2, 125.7, 125.5, 122.5, 120.5, 120.0, 107.6, 77.9, 55.5, 21.3 ppm. HRMS (ESI)  $m/z$  calculated for  $\text{C}_{27}\text{H}_{21}\text{N}_3\text{O}_2^+$   $[\text{M}+\text{H}]^+$ : 420.1707, found 420.1706.

**2.3 Inefficient heterobiaryl triflates.**

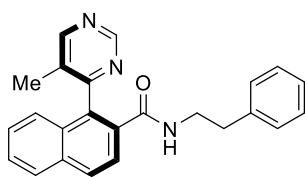

**4pa**: 63% yield, 70% *ee*

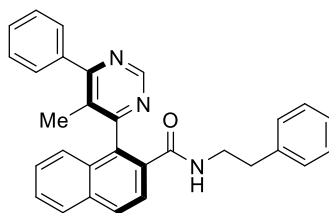

**4qa**: 72% yield, 95% *ee*

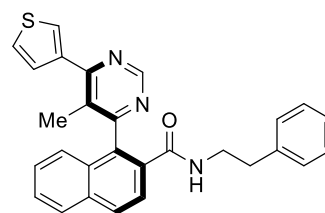

**4ra**: 67% yield, 92% *ee*

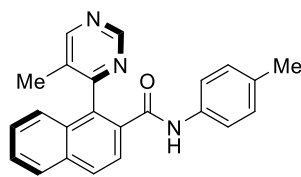

**5pa**<sup>b</sup>, 76% yield, 0% *ee*

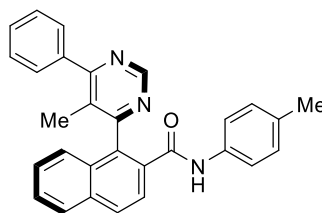

**5qa**<sup>b</sup>, 67% yield, 70% *ee*

<sup>b</sup> (S, S)-L6 was used as chiral Ligand.

**(S)-1-(5-Methylpyrimidin- 4-yl)-N-phenethyl-2-naphthamide (4pa).**

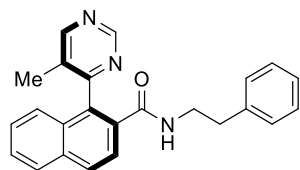

Yellow oil, 63% (23.1 mg) isolated yield,  $[\alpha]_D^{20} = -43.38$  ( $c = 0.5$  in  $\text{CHCl}_3$ ); 69% *ee*, determined by HPLC analysis (Chiralpak IC- 3 column, *n*- hexane/*i*- PrOH = 50:50 (v/v), flow rate 0.8 mL/min,  $\lambda = 254$  nm, 25 °C),  $t_R$  (major) = 9.43 min;  $t_R$  (minor) = 16.60 min;  $^1\text{H}$  NMR (500 MHz, Chloroform-*d*)  $\delta$  9.01 (s, 1H), 8.65 (s, 1H), 7.90 - 7.88 (m, 2H), 7.64 (d,  $J = 8.5$

Hz, 1H), 7.56 - 7.53 (m, 1H), 7.45 - 7.41 (m, 1H), 7.32 - 7.29 (m, 2H), 7.25 - 7.22 (m, 1H), 7.15 - 7.09 (m, 3H), 6.25 - 6.22 (m, 1H), 3.53 - 3.46 (m, 1H), 3.43 - 3.36 (m, 1H), 2.70 - 2.59 (m, 2H), 1.97 (s, 3H) ppm. **<sup>13</sup>C NMR (126 MHz, Chloroform-*d*)** δ 168.5, 165.5, 157.9, 156.3, 138.6, 134.1, 133.4, 132.9, 131.9, 130.4, 129.6, 128.8, 128.8, 128.6, 127.7, 127.4, 126.7, 125.4, 124.4, 40.9, 35.4, 16.0 ppm. **HRMS (ESI)** *m/z* calculated for C<sub>24</sub>H<sub>22</sub>N<sub>3</sub>O<sup>+</sup> [M+H]<sup>+</sup>: 368.1757, found 368.1755.

**(*S*)-1-(5-Methyl- 6- phenylpyrimidin-4-yl)-*N*-phenethyl- 2- naphthamide (4qa).**

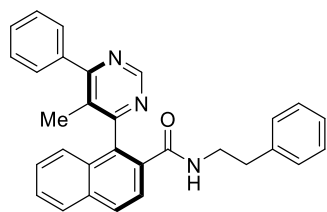

Yellow oil, 72% (31.6 mg) isolated yield,  $[\alpha]_D^{20} = -2.11$  (*c* = 1.0 in CHCl<sub>3</sub>); 95% *ee*, determined by HPLC analysis (Chiralpak IC- 3 column, *n*- hexane/*i*- PrOH = 50:50 (v/v), flow rate 0.8 mL/min, λ = 254 nm, 25 °C), *t<sub>R</sub>* (minor) = 8.64 min; *t<sub>R</sub>* (major) = 11.65 min; **<sup>1</sup>H NMR (500 MHz, Chloroform- *d*)** δ 9.08 (s, 1H), 7.90 - 7.87 (m, 2H), 7.70 - 7.65 (m, 3H), 7.57 - 7.53 (m, 1H), 7.52 - 7.46 (m, 4H), 7.31 - 7.20 (m, 4H), 7.16 - 7.14 (m, 2H), 6.31 - 6.29 (m, 1H), 3.57 - 3.50 (m, 1H), 3.46 - 3.39 (m, 1H), 2.73 - 2.67 (m, 1H), 2.66 - 2.5 (m, 1H), 2.30 (s, 3H) ppm. **<sup>13</sup>C NMR (126 MHz, Chloroform- *d*)** δ 168.7, 166.7, 166.3, 155.7, 138.6, 138.1, 134.2, 134.0, 133.0, 130.5, 129.6, 129.5, 129.3, 129.2, 128.8, 128.8, 128.6, 128.5, 127.7, 127.4, 126.7, 125.6, 124.5, 41.1, 35.5, 16.4 ppm. **HRMS (ESI)** *m/z* calculated for C<sub>30</sub>H<sub>26</sub>N<sub>3</sub>O<sup>+</sup> [M+H]<sup>+</sup>: 444.2070, found 444.2071.

**(*S*)-1-(5-Methyl- 6- (thiophen- 3- yl)pyrimidin-4-yl)-*N*-phenethyl- 2- naphthamide (4ra).**

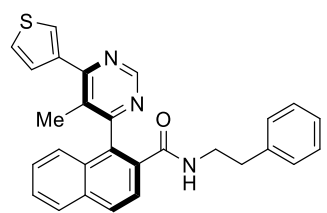

Yellow oil, 67% (30.0 mg) isolated yield,  $[\alpha]_D^{20} = +1.01$  (*c* = 1.0 in CHCl<sub>3</sub>); 92% *ee*, determined by HPLC analysis (Chiralpak IC- 3 column, *n*- hexane/*i*- PrOH = 70:30 (v/v), flow rate 0.7 mL/min, λ = 254 nm, 25 °C), *t<sub>R</sub>* (minor) = 15.84 min; *t<sub>R</sub>* (major) = 27.95 min; **<sup>1</sup>H NMR (500 MHz, Chloroform- *d*)** δ 9.05 (s, 1H), 7.94 - 7.90 (m, 2H), 7.87 - 7.86 (m, 1H), 7.69 - 7.63 (m, 2H), 7.57 - 7.53 (m, 1H), 7.46 - 7.42 (m, 2H), 7.29 - 7.19 (m, 4H), 7.12 - 7.11 (m, 2H), 6.27 - 6.25 (m, 1H), 3.53 - 3.46 (m, 1H), 3.42 - 3.35 (m, 1H), 2.69 - 2.56 (m, 2H), 2.13 (s, 3H) ppm. **<sup>13</sup>C NMR (126 MHz, Chloroform- *d*)** δ 168.7, 166.6, 160.7, 155.7, 139.6, 138.5, 134.2, 134.1, 133.1, 130.6, 129.5, 128.9, 128.8, 128.7, 128.6, 128.5, 128.4, 127.7, 127.4, 126.7, 125.9, 125.7, 124.6, 41.0, 35.4, 16.8 ppm. **HRMS (ESI)** *m/z* calculated for C<sub>28</sub>H<sub>24</sub>N<sub>3</sub>OS<sup>+</sup> [M+H]<sup>+</sup>: 450.1635, found 450.1635.

**1-(5-Methylpyrimidin-4-yl)-N-(p-tolyl)-2-naphthamide (5pa).**

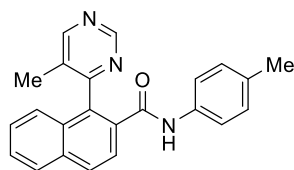

Colorless oil, 76% (26.8 mg) isolated yield, 0% *ee*, determined by HPLC analysis (Chiralpak OD-3 column, *n*-hexane/*i*-PrOH = 90:10 (v/v), flow rate 1.0 mL/min,  $\lambda$  = 254 nm, 25 °C),  $t_R$  (major) = 9.72 min;  $t_R$  (major) = 14.09 min;  **$^1\text{H}$  NMR (500 MHz, Chloroform-*d*)**  $\delta$  9.21 (s, 1H), 8.69 (s, 1H), 8.04 (s, 1H), 7.96-7.91 (m, 2H), 7.84-7.83 (m, 1H), 7.59-7.56 (m, 1H), 7.49-7.45 (m, 1H), 7.22-7.14 (m, 3H), 7.05-7.04 (m, 2H), 2.28 (s, 3H), 1.99 (s, 3H).  **$^{13}\text{C}$  NMR (125 MHz, Chloroform-*d*)**  $\delta$  166.5, 165.3, 158.4, 156.4, 135.1, 134.5, 134.3, 133.2, 133.1, 132.1, 130.4, 129.8, 129.6, 128.8, 127.9, 127.6, 125.5, 124.8, 120.0, 21.0, 16.0. **HRMS** (ESI)  $m/z$  calculated for  $\text{C}_{23}\text{H}_{20}\text{N}_3\text{O}^+ [\text{M}+\text{H}]^+$ : 354.1601, found 354.1601.

**(*R*)-1-(5-Methyl-6-phenylpyrimidin-4-yl)-N-(p-tolyl)-2-naphthamide (5qa).**

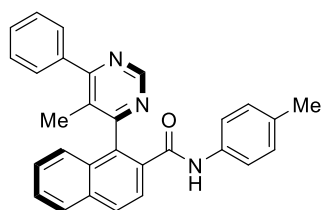

Colorless oil, 67% (28.6 mg) isolated yield,  $[\alpha]_D^{20} = +107.56$  ( $c = 1.0$  in  $\text{CHCl}_3$ ); 70% *ee*, determined by HPLC analysis (Chiralpak IC-3 column, *n*-hexane/*i*-PrOH = 90:10 (v/v), flow rate 1.0 mL/min,  $\lambda = 254$  nm, 25 °C),  $t_R$  (major) = 15.53 min;  $t_R$  (major) = 9.31 min;  **$^1\text{H}$  NMR (500 MHz, Chloroform-*d*)**  $\delta$  9.26 (s, 1H), 8.13 (s, 1H), 7.95-7.91 (m, 2H), 7.86-7.85 (m, 1H), 7.61-7.58 (m, 3H), 7.51-7.45 (m, 4H), 7.32-7.30 (m, 1H), 7.26-7.22 (m, 2H), 7.06-7.05 (m, 2H), 2.28 (s, 3H), 2.03 (s, 3H).  **$^{13}\text{C}$  NMR (125 MHz, Chloroform-*d*)**  $\delta$  166.9, 166.7, 166.4, 155.8, 137.9, 135.1, 134.5, 134.3, 133.8, 133.3, 130.5, 129.7, 129.6, 129.6, 129.4, 129.3, 128.8, 128.5, 127.9, 127.6, 125.6, 124.9, 120.2, 21.0, 16.5 ppm. **HRMS** (ESI)  $m/z$  calculated for  $\text{C}_{29}\text{H}_{24}\text{N}_3\text{O}^+ [\text{M}+\text{H}]^+$ : 430.1914, found 430.1915.

## 2.4 Crystal data of compounds **5da**、**9b**、**10b**、**11**.

The crystals suitable for single-crystal structure analysis was obtained via evaporation method of compounds **5da** DCM/*n*-Hexane. The absolute configuration of the **5da** was determined to be *R* configuration via X-ray crystal structure analysis (CCDC number: 2322364).

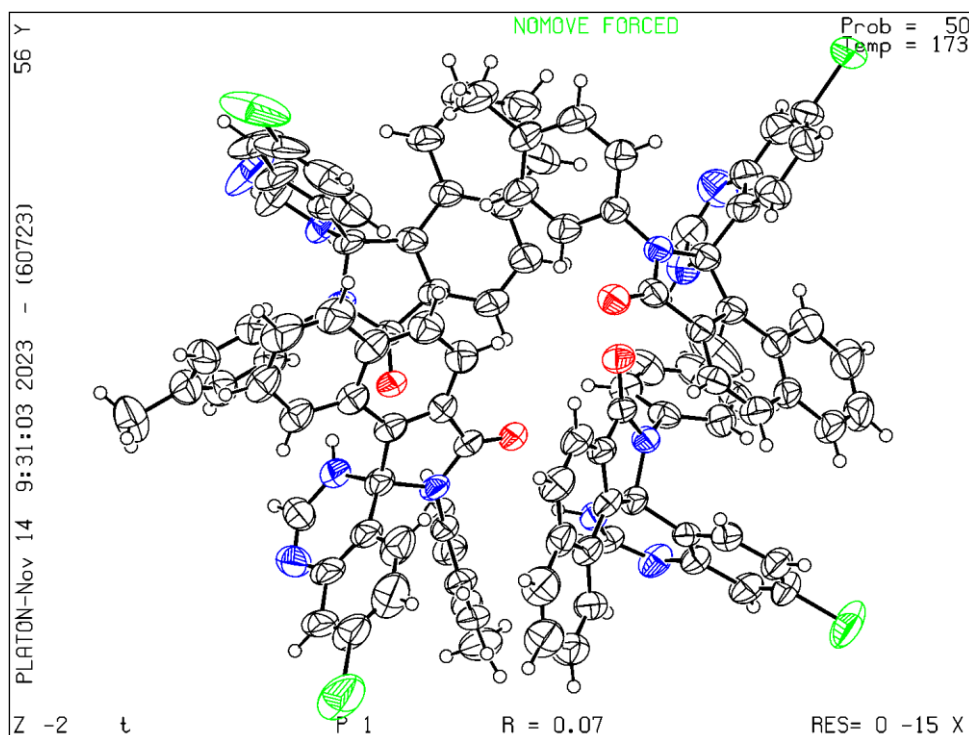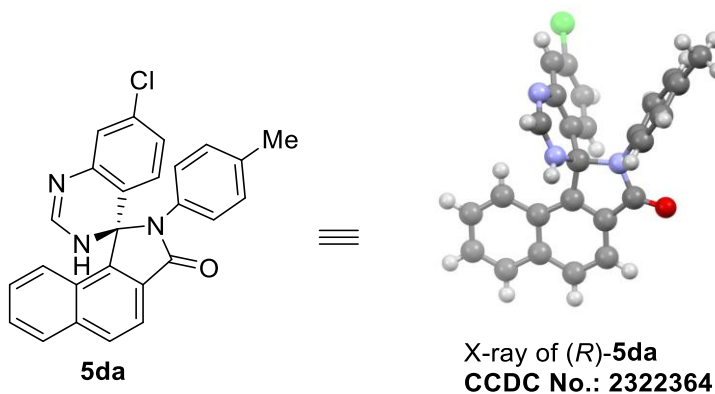

**Figure S1.** X-ray crystal structure of (*R*)-**5da**

**Table S9.** Crystal data and structure refinement for **5da**

|                     |                                                    |
|---------------------|----------------------------------------------------|
| Identification code | <b>5da</b>                                         |
| Empirical formula   | C <sub>26</sub> H <sub>18</sub> ClN <sub>3</sub> O |
| Formula weight      | 423.88                                             |



|                                   |                                             |                              |
|-----------------------------------|---------------------------------------------|------------------------------|
| Temperature                       | 173(2) K                                    |                              |
| Wavelength                        | 1.54178 Å                                   |                              |
| Crystal system                    | Triclinic                                   |                              |
| Space group                       | P1                                          |                              |
| Unit cell dimensions              | a = 9.8911(4) Å                             | $\alpha = 87.166(2)^\circ$ . |
|                                   | b = 15.4147(6) Å                            | $\beta = 80.070(3)^\circ$ .  |
|                                   | c = 15.4438(7) Å                            | $\gamma = 86.647(3)^\circ$ . |
| Volume                            | 2313.59(17) Å <sup>3</sup>                  |                              |
| Z                                 | 4                                           |                              |
| Density (calculated)              | 1.217 Mg/m <sup>3</sup>                     |                              |
| Absorption coefficient            | 1.627 mm <sup>-1</sup>                      |                              |
| F(000)                            | 880                                         |                              |
| Crystal size                      | 0.150 x 0.140 x 0.120 mm <sup>3</sup>       |                              |
| Theta range for data collection   | 2.874 to 63.657°.                           |                              |
| Index ranges                      | -11 ≤ h ≤ 11, -17 ≤ k ≤ 17, -17 ≤ l ≤ 17    |                              |
| Reflections collected             | 41599                                       |                              |
| Independent reflections           | 14698 [R(int) = 0.0656]                     |                              |
| Completeness to theta = 63.657°   | 99.9 %                                      |                              |
| Absorption correction             | Semi-empirical from equivalents             |                              |
| Max. and min. transmission        | 0.7531 and 0.6781                           |                              |
| Refinement method                 | Full-matrix least-squares on F <sup>2</sup> |                              |
| Data / restraints / parameters    | 14698 / 9 / 1121                            |                              |
| Goodness-of-fit on F <sup>2</sup> | 0.940                                       |                              |
| Final R indices [I > 2σ(I)]       | R1 = 0.0665, wR2 = 0.1576                   |                              |
| R indices (all data)              | R1 = 0.1129, wR2 = 0.1856                   |                              |
| Absolute structure parameter      | 0.057(9)                                    |                              |
| Extinction coefficient            | n/a                                         |                              |
| Largest diff. peak and hole       | 0.364 and -0.347 e.Å <sup>-3</sup>          |                              |

The crystals suitable for single-crystal structure analysis was obtained via evaporation method of compounds **9b** CHCl<sub>3</sub>/*n*-Hexane. The absolute configuration of the **9b** was determined to be *S* configuration via X-ray crystal structure analysis (CCDC number: 2446894).

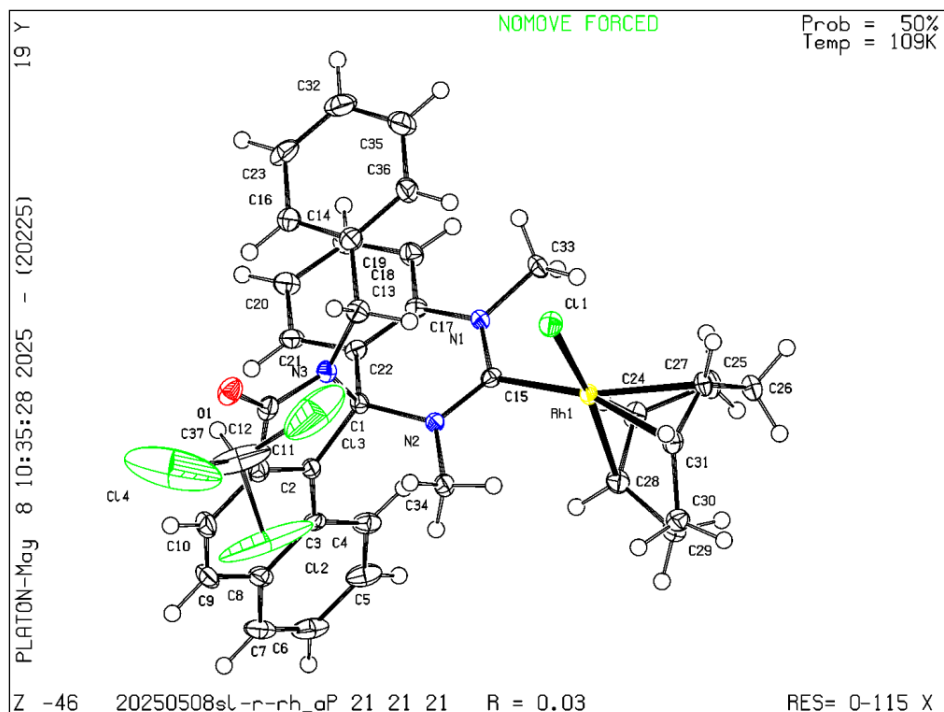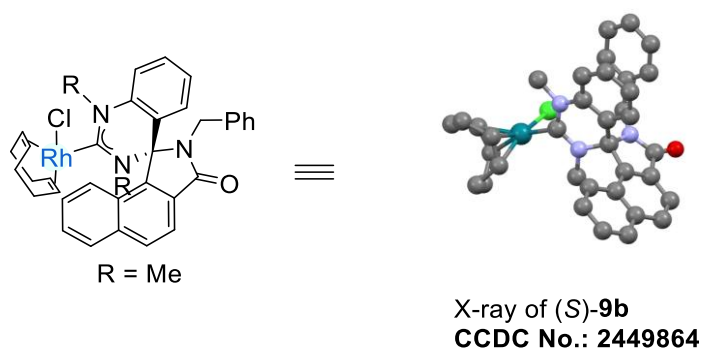

**Figure S2.** X-ray crystal structure of (*S*)-**9b**

**Table S10. Crystal data and structure refinement for 9b**

|                                   |                                               |          |
|-----------------------------------|-----------------------------------------------|----------|
| Identification code               | <b>9b</b>                                     |          |
| Empirical formula                 | $C_{37}H_{36}ClN_3ORh$                        |          |
| Formula weight                    | 783.40                                        |          |
| Temperature                       | 109(1) K                                      |          |
| Wavelength                        | 1.54184 Å                                     |          |
| Crystal system                    | Orthorhombic                                  |          |
| Space group                       | P2 <sub>1</sub> 2 <sub>1</sub> 2 <sub>1</sub> |          |
| Unit cell dimensions              | a = 12.14900(10) Å                            | a = 90°. |
|                                   | b = 12.33480(10) Å                            | b = 90°. |
|                                   | c = 22.9651(2) Å                              | g = 90°. |
| Volume                            | 3441.45(5) Å <sup>3</sup>                     |          |
| Z                                 | 4                                             |          |
| Density (calculated)              | 1.512 Mg/m <sup>3</sup>                       |          |
| Absorption coefficient            | 7.140 mm <sup>-1</sup>                        |          |
| F(000)                            | 1600                                          |          |
| Crystal size                      | 0.2 x 0.18 x 0.15 mm <sup>3</sup>             |          |
| Theta range for data collection   | 4.068 to 75.633°.                             |          |
| Index ranges                      | -13 ≤ h ≤ 15, -14 ≤ k ≤ 15, -28 ≤ l ≤ 27      |          |
| Reflections collected             | 23221                                         |          |
| Independent reflections           | 6757 [R(int) = 0.0255]                        |          |
| Completeness to theta = 67.684°   | 99.8 %                                        |          |
| Absorption correction             | Semi-empirical from equivalents               |          |
| Max. and min. transmission        | 1.00000 and 0.26421                           |          |
| Refinement method                 | Full-matrix least-squares on F <sup>2</sup>   |          |
| Data / restraints / parameters    | 6757 / 0 / 417                                |          |
| Goodness-of-fit on F <sup>2</sup> | 1.021                                         |          |
| Final R indices [I > 2σ(I)]       | R1 = 0.0309, wR2 = 0.0764                     |          |
| R indices (all data)              | R1 = 0.0311, wR2 = 0.0766                     |          |
| Absolute structure parameter      | -0.011(4)                                     |          |
| Extinction coefficient            | n/a                                           |          |
| Largest diff. peak and hole       | 1.039 and -1.066 e.Å <sup>-3</sup>            |          |

The crystals suitable for single-crystal structure analysis was obtained via evaporation method of compounds **10b** DCM/*n*-Hexane. The absolute configuration of the **10b** was determined to be *S* configuration via X-ray crystal structure analysis (CCDC number: 2446892).

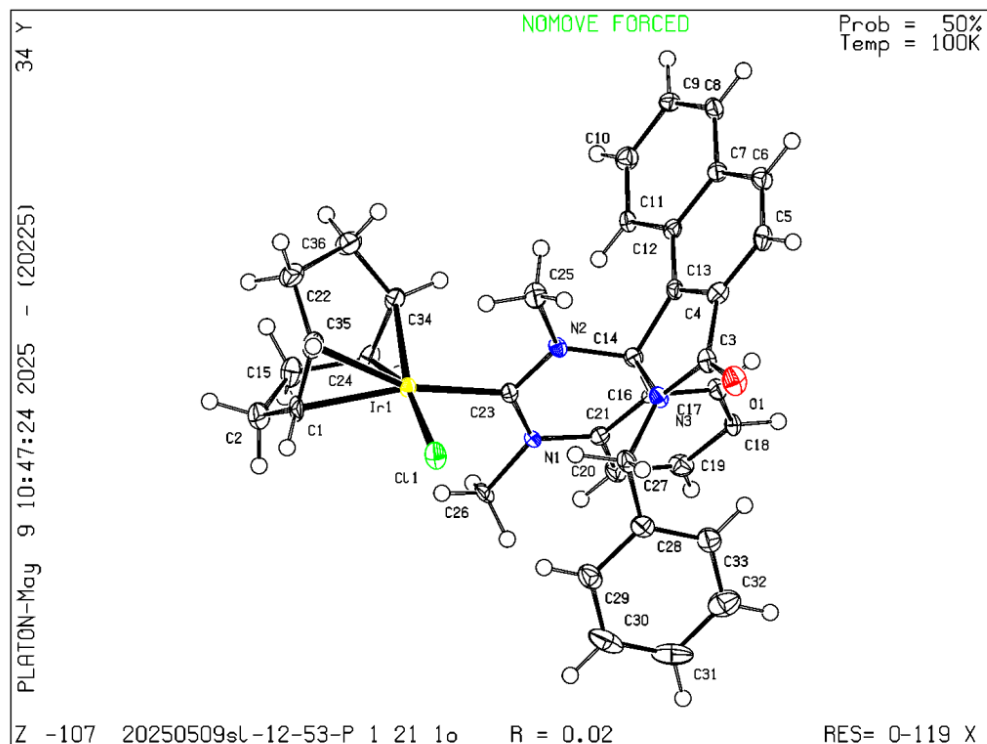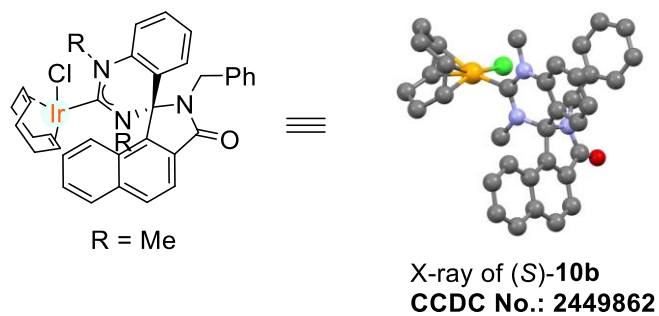

Figure S3. X-ray crystal structure of (*S*)- **10a**

**Table S11. Crystal data and structure refinement for 10b**

|                                   |                                                    |                    |
|-----------------------------------|----------------------------------------------------|--------------------|
| Identification code               | <b>10b</b>                                         |                    |
| Empirical formula                 | $\text{C}_{36}\text{H}_{35}\text{ClIrN}_3\text{O}$ |                    |
| Formula weight                    | 753.32                                             |                    |
| Temperature                       | 99.9(3) K                                          |                    |
| Wavelength                        | 1.54184 Å                                          |                    |
| Crystal system                    | Monoclinic                                         |                    |
| Space group                       | P 1 21 1                                           |                    |
| Unit cell dimensions              | a = 8.81780(10) Å                                  | a = 90°.           |
|                                   | b = 16.31940(10) Å                                 | b = 107.6480(10)°. |
|                                   | c = 10.78590(10) Å                                 | g = 90°.           |
| Volume                            | 1479.06(2) Å <sup>3</sup>                          |                    |
| Z                                 | 2                                                  |                    |
| Density (calculated)              | 1.692 Mg/m <sup>3</sup>                            |                    |
| Absorption coefficient            | 9.834 mm <sup>-1</sup>                             |                    |
| F(000)                            | 748                                                |                    |
| Crystal size                      | 0.18 x 0.16 x 0.15 mm <sup>3</sup>                 |                    |
| Theta range for data collection   | 4.301 to 75.754°.                                  |                    |
| Index ranges                      | -10 ≤ h ≤ 10, -19 ≤ k ≤ 18, -13 ≤ l ≤ 13           |                    |
| Reflections collected             | 20346                                              |                    |
| Independent reflections           | 5702 [R(int) = 0.0380]                             |                    |
| Completeness to theta = 67.684°   | 99.9 %                                             |                    |
| Absorption correction             | Semi-empirical from equivalents                    |                    |
| Max. and min. transmission        | 1.00000 and 0.58050                                |                    |
| Refinement method                 | Full-matrix least-squares on F <sup>2</sup>        |                    |
| Data / restraints / parameters    | 5702 / 1 / 382                                     |                    |
| Goodness-of-fit on F <sup>2</sup> | 1.059                                              |                    |
| Final R indices [I > 2σ(I)]       | R1 = 0.0209, wR2 = 0.0554                          |                    |
| R indices (all data)              | R1 = 0.0209, wR2 = 0.0554                          |                    |
| Absolute structure parameter      | -0.026(7)                                          |                    |
| Extinction coefficient            | 0.00138(13)                                        |                    |
| Largest diff. peak and hole       | 0.710 and -0.512 e.Å <sup>-3</sup>                 |                    |

The crystals suitable for single-crystal structure analysis was obtained via evaporation method of compounds **11** DCM/*n*-Hexane. The absolute configuration of the **11** was determined to be *S* configuration via X-ray crystal structure analysis (CCDC number: 2457242).

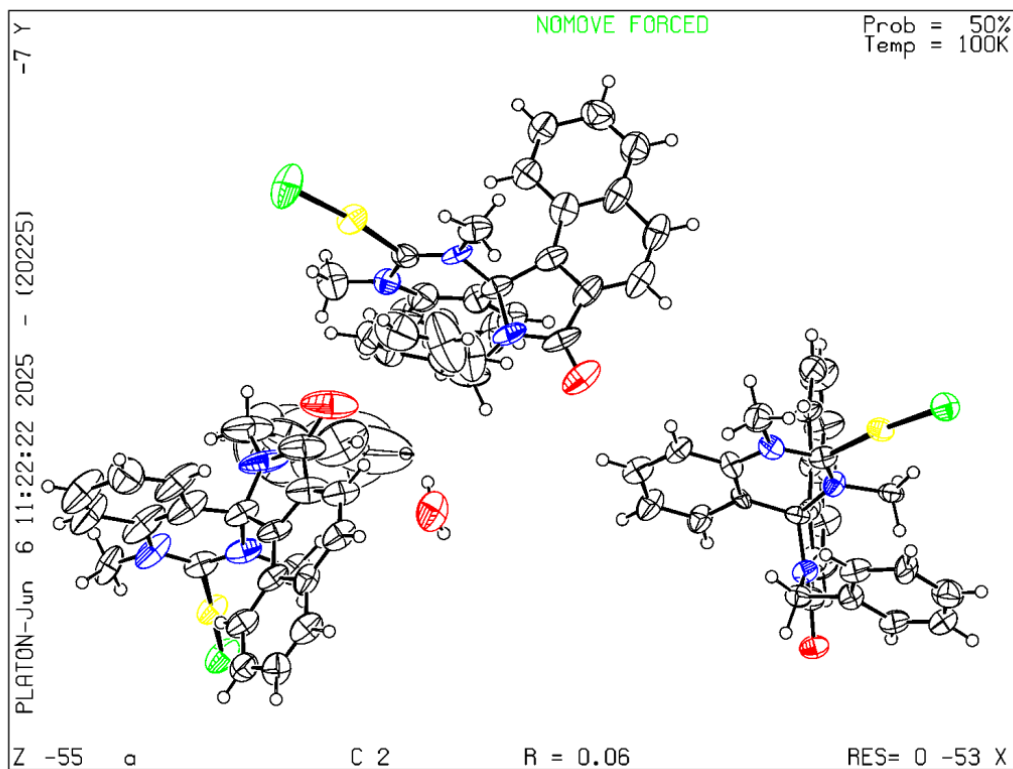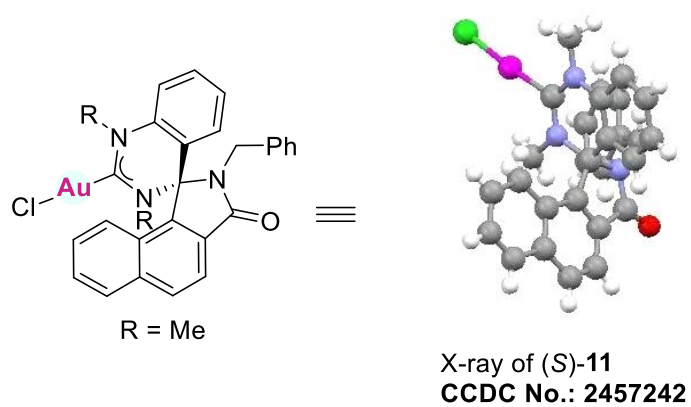

**Figure S4. X-ray crystal structure of (*S*)-11**

**Table S12. Crystal data and structure refinement for 10b**

|                                   |                                                                    |                              |
|-----------------------------------|--------------------------------------------------------------------|------------------------------|
| Identification code               | <b>11</b>                                                          |                              |
| Empirical formula                 | $C_{84}H_{71}Au_3Cl_3N_9O_4$                                       |                              |
| Formula weight                    | 1967.74                                                            |                              |
| Temperature                       | 100(2) K                                                           |                              |
| Wavelength                        | 1.54184 Å                                                          |                              |
| Crystal system                    | Monoclinic                                                         |                              |
| Space group                       | C2                                                                 |                              |
| Unit cell dimensions              | $a = 24.0503(6)$ Å                                                 | $\alpha = 90^\circ$ .        |
|                                   | $b = 12.2870(2)$ Å                                                 | $\beta = 109.212(3)^\circ$ . |
|                                   | $c = 30.3447(8)$ Å                                                 | $\gamma = 90^\circ$ .        |
| Volume                            | 8467.7(4) Å <sup>3</sup>                                           |                              |
| Z                                 | 4                                                                  |                              |
| Density (calculated)              | 1.544 Mg/m <sup>3</sup>                                            |                              |
| Absorption coefficient            | 10.855 mm <sup>-1</sup>                                            |                              |
| F(000)                            | 3832                                                               |                              |
| Crystal size                      | 0.160 x 0.150 x 0.140 mm <sup>3</sup>                              |                              |
| Theta range for data collection   | 3.084 to 75.938°.                                                  |                              |
| Index ranges                      | $-28 \leq h \leq 29$ , $-13 \leq k \leq 15$ , $-37 \leq l \leq 37$ |                              |
| Reflections collected             | 25404                                                              |                              |
| Independent reflections           | 12598 [R(int) = 0.0381]                                            |                              |
| Completeness to theta = 67.684°   | 98.6 %                                                             |                              |
| Absorption correction             | Semi-empirical from equivalents                                    |                              |
| Max. and min. transmission        | 1.00000 and 0.65968                                                |                              |
| Refinement method                 | Full-matrix least-squares on F <sup>2</sup>                        |                              |
| Data / restraints / parameters    | 12598 / 8 / 919                                                    |                              |
| Goodness-of-fit on F <sup>2</sup> | 0.900                                                              |                              |
| Final R indices [I > 2sigma(I)]   | R1 = 0.0562, wR2 = 0.1549                                          |                              |
| R indices (all data)              | R1 = 0.0714, wR2 = 0.1703                                          |                              |
| Absolute structure parameter      | -0.027(13)                                                         |                              |
| Extinction coefficient            | 0.000116(14)                                                       |                              |
| Largest diff. peak and hole       | 2.708 and -2.264 e.Å <sup>-3</sup>                                 |                              |

### 3. Mechanistic studies

#### 3.1 Procedure for synthesis of **12**.

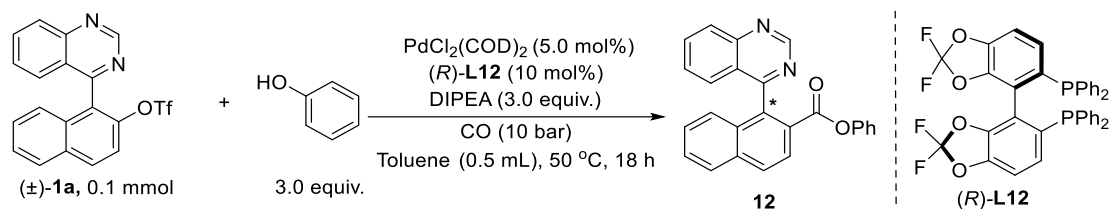

In a glovebox, to a 4 mL screw-cap vial equipped with an oven-dried stirring bar were added the  $\text{PdCl}_2(\text{COD})_2$  (0.005 mol, 5.0 mol%), **L12** (0.01 mmol 10.0 mol%), heterobiaryl triflate **1a** (0.1 mmol, 1.0 equiv.), phenol (0.3 mmol, 3.0 equiv.), toluene (0.5 mL), and DIPEA (0.3 mmol, 3.0 equiv.) was added via a syringe. The vial was closed by PTFE/white rubber septum (13 mm Septa) and phenolic cap and connected with atmosphere with a needle. Next, the vial was fixed in an alloy plate and put into Parr 4760 series autoclave (300 mL) under nitrogen atmosphere. At room temperature, the autoclave is flushed with carbon monoxide for three times and carbon monoxide was charged to 10 bar pressure. The reaction was heated under specific temperature for 18 hours. Afterwards, the autoclave was cooled to room temperature and the pressure was carefully released. The reaction mixture was concentrated and purified by column chromatography on silica gel (eluent: petroleum ether/ethyl acetate = 6/1) to afford the desired chiral axial ester products **12** (35.7 mg, 95% yield, 90% *ee*) as a colorless oil.  $[\alpha]_{\text{D}}^{20} = +55.48$  ( $c = 1.0$  in  $\text{CHCl}_3$ ); 90% *ee*, determined by HPLC analysis (Chiralpak OD-3 column, *n*-Hexane/*i*-PrOH = 90:10 (v/v), flow rate 1 mL/min,  $\lambda = 254$  nm, 25 °C),  $t_{\text{R}}$  (major) = 16.15 min;  $t_{\text{R}}$  (minor) = 26.52 min; **<sup>1</sup>H NMR (500 MHz, Chloroform-*d*)**  $\delta$  9.47 (s, 1H), 8.39 (d,  $J = 8.5$  Hz, 1H), 8.18-8.13 (m, 2H), 8.03 (d,  $J = 8.0$  Hz, 1H), 7.90-7.87 (m, 1H), 7.64-7.61 (m, 1H), 7.48-7.43 (m, 2H), 7.41-7.38 (m, 1H), 7.25-7.22 (m, 2H), 7.17-7.10 (m, 2H), 6.75-6.72 (m, 2H) ppm. **<sup>13</sup>C NMR (125 MHz, Chloroform-*d*)**  $\delta$  169.3, 164.7, 154.9, 150.4, 150.1, 138.0, 135.7, 134.1, 131.9, 130.0, 129.5, 129.1, 128.8, 128.4, 128.1, 127.8, 127.2, 126.7, 126.4, 126.2, 126.0, 125.5, 121.2 ppm. **HRMS (ESI)**  $m/z$  calculated for  $\text{C}_{26}\text{H}_{17}\text{N}_2\text{O}_2^+$   $[\text{M}+\text{H}]^+$ : 377.1285, found 377.1289.



### 3.2 Kinetic experiments using (*rac*)-**1a** with **2a** and **3a**<sup>[4]</sup>.

In a glovebox, to a 4 mL screw-cap vial equipped with an oven-dried stirring bar were added the Pd(acac)<sub>2</sub> (0.0075 mmol, 7.5 mol%), (*R*, *S*<sub>FC</sub>)-**L4** (0.012 mmol, 12.0 mol%), **1a** (0.1 mmol, 1.0 equiv.), **2a** (0.3 mmol, 3.0 equiv.), Cs<sub>2</sub>CO<sub>3</sub> (0.3 mmol, 3.0 equiv.). The vial was closed by PTFE/white rubber septum (13 mm Septa) and phenolic cap and connected with atmosphere with a needle. Then, DME (0.5 mL) was added via a syringe. Next, the vial was fixed in an alloy plate and put into Paar 4760 series autoclave (300 mL) under nitrogen atmosphere. At room temperature, the autoclave is flushed with carbon monoxide for three times and carbon monoxide was charged to specific pressure. The reaction was heated under 50 °C for specific times. Afterwards, the autoclave was cooled to room temperature and the pressure was carefully released. The reaction mixture was concentrated and purified by column chromatography on silica gel (eluent: petroleum ether/ethyl acetate = 1/1) to afford the desired spirodiamine product.

| 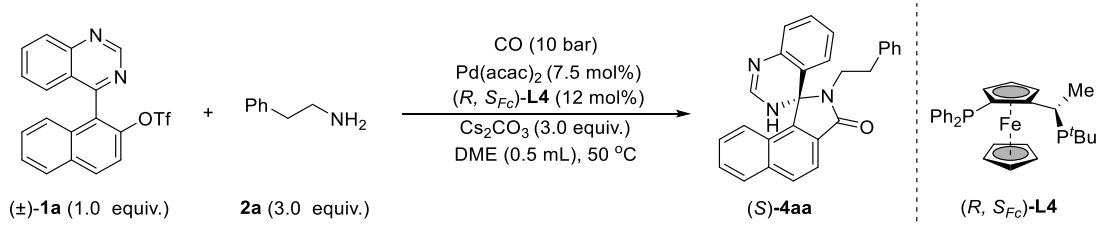 |                     |                        |                      |                         |
|-------------------------------------------------------------------------------------|---------------------|------------------------|----------------------|-------------------------|
| t/min                                                                               | ee of <b>1a</b> (%) | yield of <b>1a</b> (%) | ee of <b>4aa</b> (%) | yield of <b>4aa</b> (%) |
| 10                                                                                  | 7                   | 99                     | -                    | -                       |
| 40                                                                                  | 14                  | 81                     | 95                   | 17                      |
| 100                                                                                 | 15                  | 40                     | 96                   | 47                      |
| 150                                                                                 | 6                   | 18                     | 96                   | 67                      |
| 180                                                                                 | 5                   | 12                     | 97                   | 74                      |
| 240                                                                                 | -                   | -                      | 96                   | 89                      |
| 1080                                                                                | -                   | -                      | 97                   | 91                      |

<sup>a</sup> Reaction conditions: **1a** (0.1 mmol, 1.0 equiv.), **2a** (3.0 equiv.) and CO (10 bar), Pd(acac)<sub>2</sub> (7.5 mol%), (*R*, *S*<sub>FC</sub>)-**L4** (12 mol%), and Cs<sub>2</sub>CO<sub>3</sub> (0.3 mmol, 3.0 equiv.) in DME(0.5 mL) at 50 °C for specific time (average of three independent runs). The yields were determined by GC analysis using dodecane as the internal standard. The *ee* value was determined by HPLC using a chiral column.

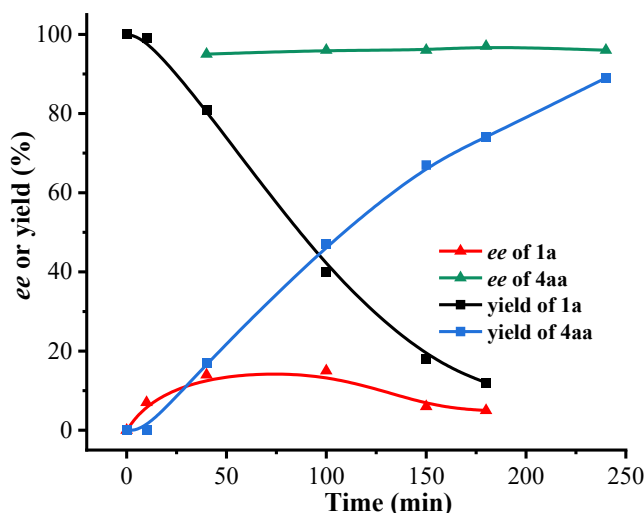

In a glovebox, to a 4 mL screw-cap vial equipped with an oven-dried stirring bar were added the Pd(OAc)<sub>2</sub> (0.01 mmol, 10.0 mol%), (*R, R*)-**L19** (0.012 mmol, 12.0 mol%), **1a** (0.1 mmol, 1.0 equiv.), *p*-methylaniline **3a** (0.2 mmol, 2.0 equiv.), Cs<sub>2</sub>CO<sub>3</sub> (0.3 mmol, 3.0 equiv.). The vial was closed by PTFE/white rubber septum (13 mm Septa) and phenolic cap and connected with atmosphere with a needle. Then, DCM (0.5 mL) and DCE (0.05 mL) was added via a syringe. Next, the vial was fixed in an alloy plate and put into Paar 4760 series autoclave (300 mL) under nitrogen atmosphere. At room temperature, the autoclave is flushed with carbon monoxide for three times and carbon monoxide was charged to specific pressure. The reaction was heated under 80 °C for specific times. Afterwards, the autoclave was cooled to room temperature and the pressure was carefully released. The reaction mixture was concentrated and purified by column chromatography on silica gel (eluent: petroleum ether/ethyl acetate = 1/1) to afford the desired spirodiamine product.

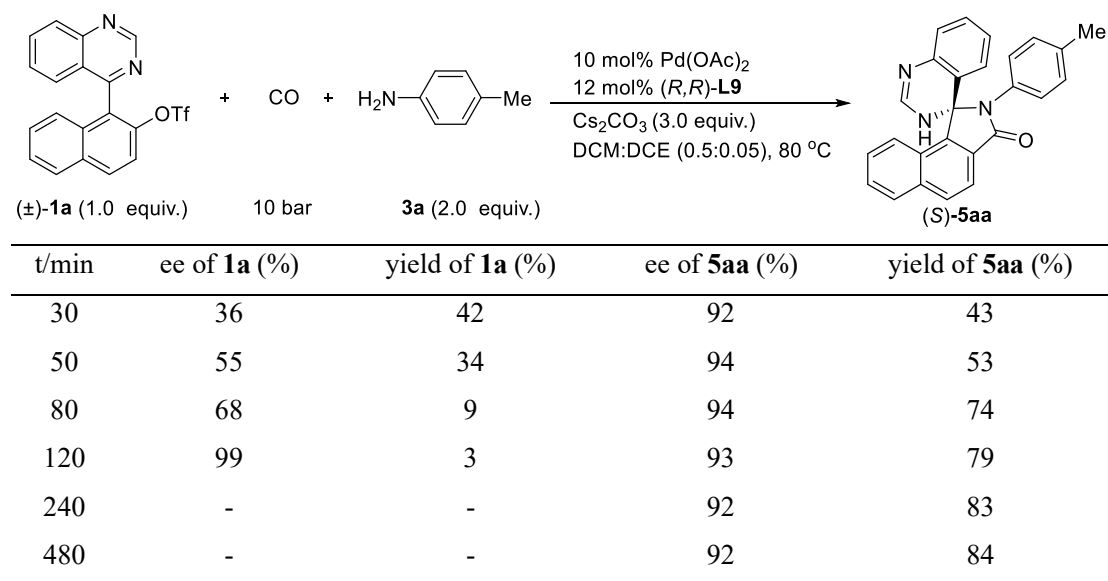

<sup>a</sup> Reaction conditions: **1a** (0.1 mmol, 1.0 equiv.), **3a** (2.0 equiv.) and CO (10 bar), Pd(OAc)<sub>2</sub> (10 mol%), (*R, R*)-**L9** (12 mol%), and Cs<sub>2</sub>CO<sub>3</sub> (0.3 mmol, 3.0 equiv.) in DCM:DCE(0.5:0.05) as co-solvent at 80 °C for specific time (average of three independent runs). The yields were determined by GC analysis using dodecane as the internal standard. The *ee* value was determined by HPLC using a chiral column.

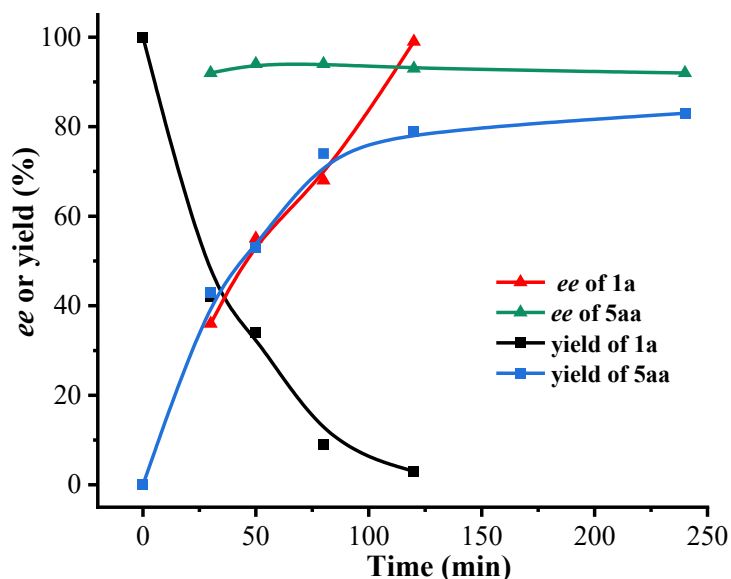

### 3.3 Non-linear effect.

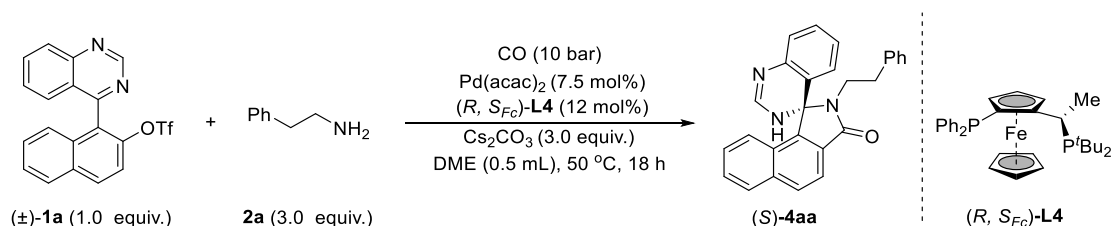

In a glovebox, to a 4 mL screw-cap vial equipped with an oven-dried stirring bar were added the Pd(acac)<sub>2</sub> (0.0075 mmol, 7.5 mol%), (*R, S<sub>FC</sub>*)-**L4** (0.012 mmol, 12.0 mol%, *x*% *ee*), **1a** (0.1 mmol, 1.0 equiv.), **2a** (0.3 mmol, 3.0 equiv.), Cs<sub>2</sub>CO<sub>3</sub> (0.3 mmol, 3.0 equiv.). The vial was closed by PTFE/white rubber septum (13 mm Septa) and phenolic cap and connected with atmosphere with a needle. Then, DME (0.5 mL) was added via a syringe. Next, the vial was fixed in an alloy plate and put into Paar 4760 series autoclave (300 mL) under nitrogen atmosphere. At room temperature, the autoclave is flushed with carbon monoxide for three times and carbon monoxide was charged to 10 bar. The reaction was heated under 50 °C for 18 h. Afterwards, the autoclave was cooled to room temperature and the pressure was carefully released. The reaction mixture was concentrated and purified by column chromatography on silica gel (eluent: petroleum ether/ethyl acetate = 1/1) to afford the desired spirodiamine product. The *ee* value of (*R, S<sub>FC</sub>*)-**L4** was determined by HPLC

analysis (Chiralpak OD-3 column, *n*-hexane/*i*-PrOH = 99.9:0.1 (v/v), flow rate 0.5 mL/min,  $\lambda$  = 254 nm, 25 °C),  $t_R$  (minor) = 12.91 min;  $t_R$  (major) = 16.22 min. The *ee* value of **4aa** was determined by HPLC analysis (Chiralpak IA-3 column, *n*-hexane/*i*-PrOH = 90:10 (v/v), flow rate 0.7 mL/min,  $\lambda$  = 254 nm, 25 °C),  $t_R$  (minor) = 36.14 min;  $t_R$  (major) = 38.43 min.

| Entry | <i>ee</i> of ( <i>R</i> , <i>S</i> <sub>FC</sub> )- <b>L4</b> (%) | <i>ee</i> of <b>4aa</b> (%) |
|-------|-------------------------------------------------------------------|-----------------------------|
| 1     | 0                                                                 | 0                           |
| 2     | 20                                                                | 24                          |
| 3     | 40                                                                | 38                          |
| 4     | 49                                                                | 48                          |
| 5     | 66                                                                | 64                          |
| 6     | 84                                                                | 78                          |
| 7     | 91                                                                | 85                          |
| 8     | >99                                                               | 97                          |

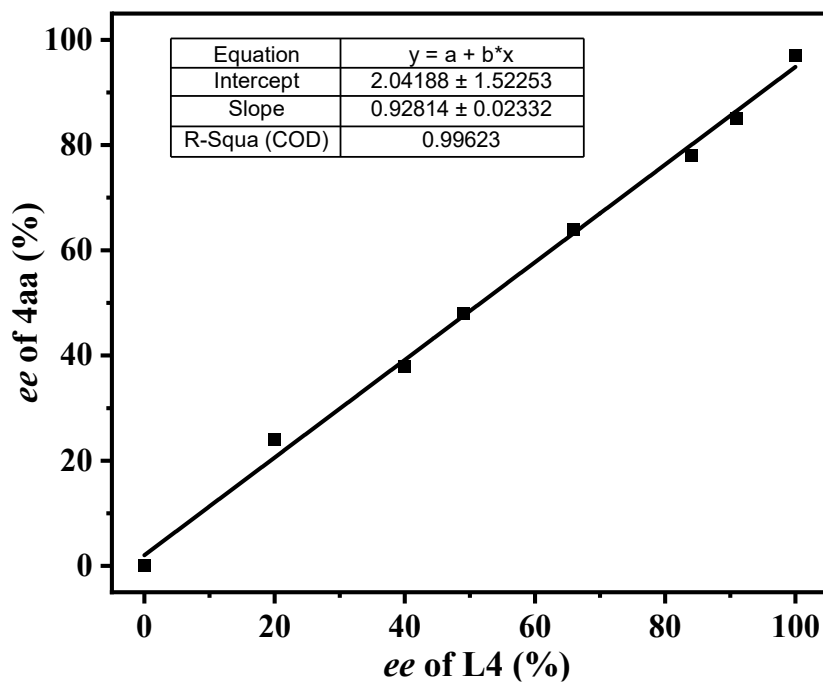

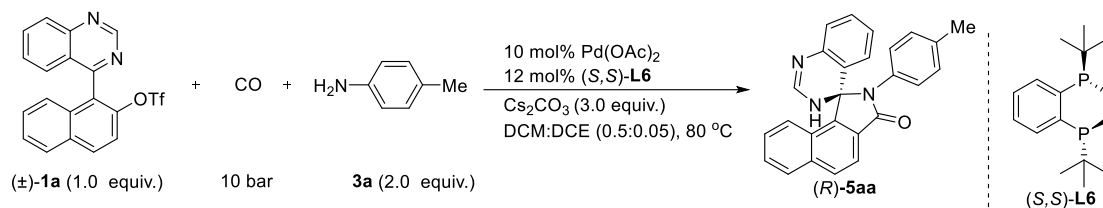

In a glovebox, to a 4 mL screw-cap vial equipped with an oven-dried stirring bar were added the **Pd(OAc)<sub>2</sub>** (0.01 mmol, 10 mol%), **(S,S)-L6** (0.012 mmol, 12.0 mol%, x% ee), **1a** (0.1 mmol, 1.0 equiv.), **3a** (0.2 mmol, 2.0 equiv.), **Cs<sub>2</sub>CO<sub>3</sub>** (0.3 mmol, 3.0 equiv.). The vial was closed by PTFE/white rubber septum (13 mm Septa) and phenolic cap and connected with atmosphere with a needle. Then, DCM (0.5 mL) and DCE (0.05 mL) was added via a syringe. Next, the vial was fixed in an alloy plate and put into Paar 4760 series autoclave (300 mL) under nitrogen atmosphere. At room temperature, the autoclave is flushed with carbon monoxide for three times and carbon monoxide was charged to 10 bar. The reaction was heated under 80 °C for 18 h. Afterwards, the autoclave was cooled to room temperature and the pressure was carefully released. The reaction mixture was concentrated and purified by column chromatography on silica gel (eluent: petroleum ether/ethyl acetate = 1/1) to afford the desired spirodiamine product.

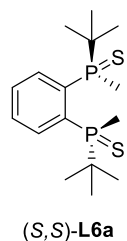

In order to determine the enantiomeric excess of **(S,S)-L6**, it was converted into diphosphine disulfide derivative **[(S,S)-L6a]** by treatment with excess sulfur in refluxing hexane for 20 h <sup>[5]</sup>. The product was isolated by preparative TLC (petroleum ether/ethyl acetate = 5:1) and the *ee* value of the compound was determined by HPLC analysis (Chiralpak AS-3 column, *n*-hexane/*i*-PrOH = 93:7 (v/v), flow rate 1.0 mL/min,  $\lambda$  = 254 nm, 25 °C), *t<sub>R</sub>* (minor) = 10.33 min; *t<sub>R</sub>* (major) = 15.95 min. The *ee* value of **5aa** was determined by HPLC analysis (Chiralpak IA-3 column, *n*-hexane/*i*-PrOH = 80:20 (v/v), flow rate 1.0 mL/min,  $\lambda$  = 254 nm, 25 °C), *t<sub>R</sub>* (minor) = 21.50 min; *t<sub>R</sub>* (major) = 24.39 min.

| Entry | <i>ee</i> of <b>(S,S)-L6</b> (%) | <i>ee</i> of <b>5aa</b> (%) |
|-------|----------------------------------|-----------------------------|
| 1     | 0                                | 0                           |
| 2     | 19                               | 8                           |
| 3     | 30                               | 12                          |
| 4     | 54                               | 32                          |
| 5     | 78                               | 66                          |
| 6     | >99                              | 96                          |

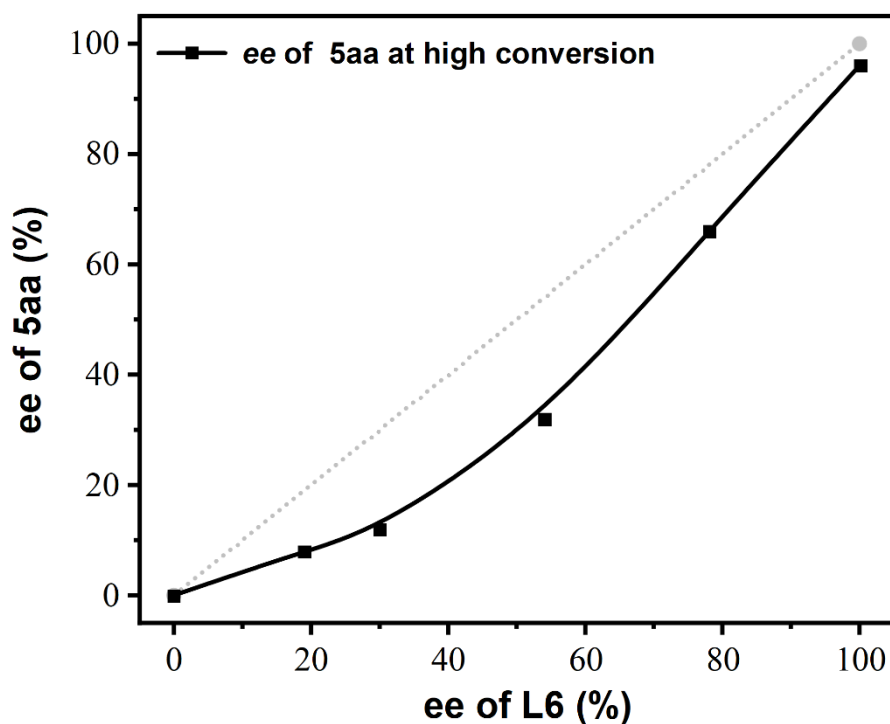

### 3.4 Stability experiments of products **5da**.

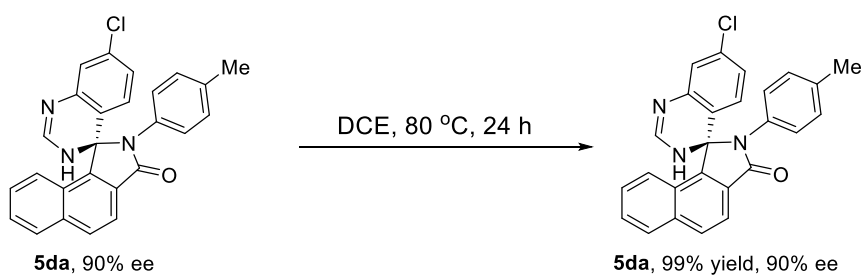

In an N<sub>2</sub>-filled glovebox, to a 4 mL screw-cap vial equipped with an oven-dried stirring bar were added the **5da** (42.3 mg, 0.1 mmol, 1.0 equiv.) and dry DCE (1.0 mL). And the reaction mixture was stirred at 80 °C for 24 h. Then, the reaction mixture was cooled to room temperature and concentrated under vacuum. The residue was purified by flash column chromatography on silica gel (eluent: petroleum ether/ ethyl acetate = 1/1) to afford the product **5da** (41.9 mg, 99% yield, 90% ee) as a colorless oil.

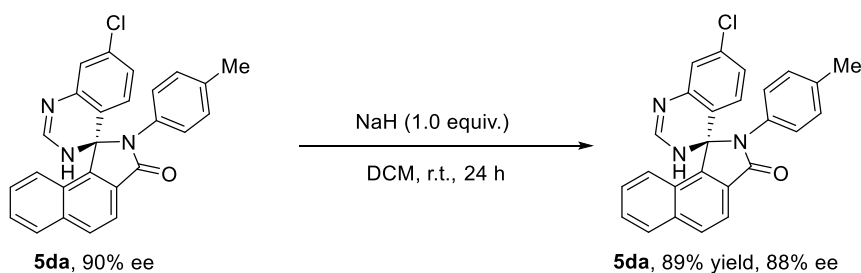

To a 4 mL screw-cap vial equipped with an oven-dried stirring bar were added the **5da** (42.3 mg, 0.1 mmol, 1.0 equiv.) and DCM (1.0 mL). Then, NaH (60% suspension in mineral oil, 4 mg, 0.1 mmol, 1.0 equiv.) was added portion wise at 0 °C. Next, the reaction mixture was warm to room temperature and stirred for 24 h. After stirring for 24 h, the mixture was quenched with H<sub>2</sub>O, and extracted with EA (3 × 10 mL). The combined organic layers were dried over anhydrous Na<sub>2</sub>SO<sub>4</sub> and then concentrated under vacuum. The residue was purified by flash column chromatography on silica gel (eluent: petroleum ether/ ethyl acetate = 1/1) to afford the product **5da** (37.6 mg, 89% yield, 88% ee) as a colorless oil.

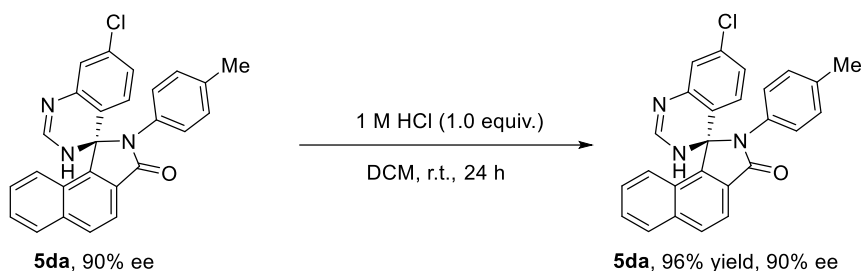

To a 4 mL screw-cap vial equipped with an oven-dried stirring bar were added the **5da** (42.3 mg, 0.1 mmol, 1.0 equiv.) and DCM (1.0 mL). Then, 1 M HCl (0.1 mmol, 1.0 equiv.) was added dropwise at 0 °C. Next, the reaction mixture was warm to room temperature and stirred for 24 h. After stirring for 24 h, the mixture was quenched with H<sub>2</sub>O, and extracted with EA (3 × 10 mL). The combined organic layers were dried over anhydrous Na<sub>2</sub>SO<sub>4</sub> and then concentrated under vacuum. The residue was purified by flash column chromatography on silica gel (eluent: petroleum ether/ ethyl acetate = 1/1) to afford the product **5da** (40.6 mg, 96% yield, 90% ee) as a colorless oil.

#### 4. Synthetic application of the methodology.

#### 4.1 Scale up reaction of product 4ac.

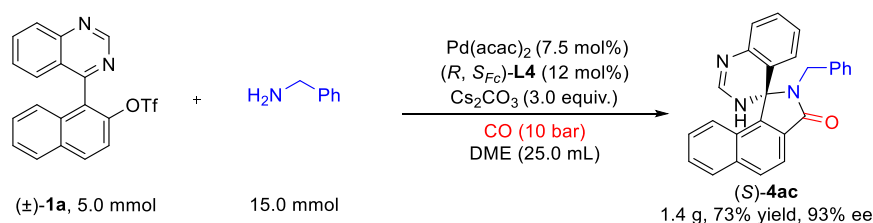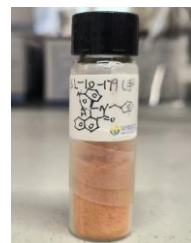

A 300 mL vial was charged with Pd(acac)<sub>2</sub> (114.2 mg, 7.5 mol%, 0.075 equiv.), **1a** (5.0 mmol, 1.0 equiv.), and an oven-dried stirring bar. The vial was closed by PTFE/white rubber septum (13

mm Septa) and phenolic cap and connected with atmosphere with a needle. After evacuated and backfilled nitrogen three times, (*R, S<sub>FC</sub>*)-**L4** (325.2 mg, 12 mol%, 0.12 equiv.), and Cs<sub>2</sub>CO<sub>3</sub> (30.0 mmol, 3.0 equiv.) were added, followed by addition of DME (25.0 mL) and benzylamine (15.0 mmol, 3.0 equiv.). Next, the vial was fixed in an alloy plate and put into Paar 4560 series autoclave (300 mL) under nitrogen atmosphere. At room temperature, the autoclave is flushed with carbon monoxide for three times and carbon monoxide was charged to 10 bar. The reaction was heated under 50 °C for 18 hours. Afterwards, the autoclave was cooled to room temperature and the pressure was carefully released. The reaction mixture was concentrated and purified by column chromatography on silica gel (eluent: petroleum ether/ethyl acetate = 3/1) to afford the desired spiroisamine products **4ac** (1.4 g, 73% yield, 93% *ee*) as a brown solid.

## 4.2 Procedure for synthesis of **6**.

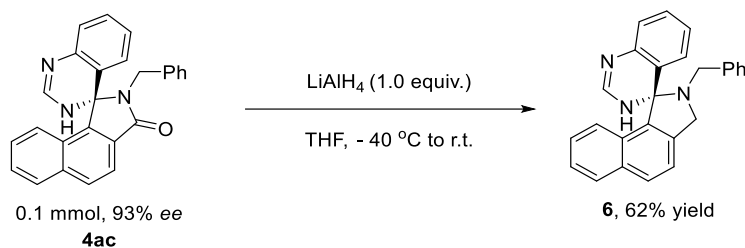

Synthesis of **6** <sup>[6]</sup>: In an N<sub>2</sub>-filled glovebox, to a 8 mL screw-cap vial equipped with an oven-dried stirring bar were added the **4ac** (38.9 mg, 0.1 mmol, 1.0 equiv.) and dry THF (2.0 mL). And the reaction mixture was stirred at -40 °C for 10 min. Then, 1 M LiAlH<sub>4</sub> (0.1 mmol, 1.0 equiv.) solution was added dropwise to the reaction mixture and stirred at -40 °C for another 30 min. Next, warm to room temperature and stirred for 18 h. After stirring for 18 h, the mixture was quenched with H<sub>2</sub>O, and extracted with EA (3 × 10 mL). The combined organic layers were dried over anhydrous Na<sub>2</sub>SO<sub>4</sub> and then concentrated under vacuum. The residue was purified by flash column chromatography on silica gel (eluent: petroleum ether/ ethyl acetate = 1/1) to afford the product **6** (20.8 mg, 62% yield) as a colorless oil. [ $\alpha$ ]<sub>D</sub><sup>20</sup> = -4.66 (*c* = 0.5 in CHCl<sub>3</sub>); <sup>1</sup>H NMR (500 MHz, Chloroform-*d*)  $\delta$  7.87-7.85 (m, 2H), 7.64-7.59 (m, 2H), 7.87-7.85 (m, 2H), 7.44-7.41 (m, 1H), 7.29-7.26 (m, 1H), 7.21-7.14 (m, 4H), 7.08-7.06 (m, 2H), 6.94-6.91 (m, 1H), 6.83-6.81 (m, 1H), 3.81 (s, 2H), 3.62 (s, 2H) ppm. <sup>13</sup>C NMR (125 MHz, Chloroform-*d*)  $\delta$  141.0, 139.8, 137.9, 133.9, 133.3, 132.6, 130.5, 130.4, 128.4, 128.1, 128.0, 127.8, 127.8, 127.1, 127.0, 126.1, 125.6, 120.0, 119.2,



117.2, 109.7, 92.5, 53.4, 52.1 ppm. **HRMS** (ESI)  $m/z$  calculated for  $C_{26}H_{22}N_3^+$   $[M+H]^+$ : 376.1808, found 376.1813.

### 4.3 Procedure for synthesis of 7.

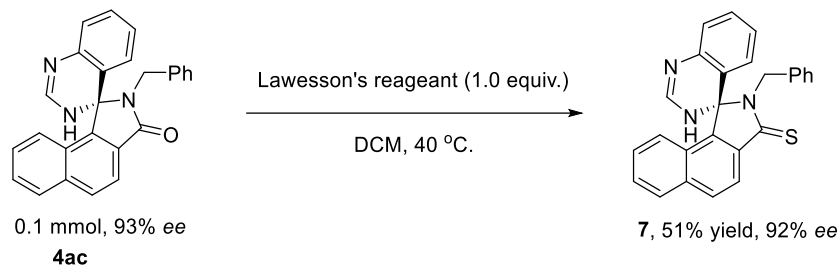

Synthesis of **7** <sup>[7]</sup>: In an  $N_2$ -filled glovebox, to a 8 mL screw-cap vial equipped with an oven-dried stirring bar were added the **4ac** (38.9 mg, 0.1 mmol, 1.0 equiv.), Lawesson's reagent (40.4 mg, 0.1 mmol, 1.0 equiv.) and dry DCM (2.0 mL). And the reaction mixture was stirred at 40 °C for 20 h. Then, the reaction mixture cooled to room temperature and quenched with  $H_2O$ . Next, the reaction mixture was extracted with EA ( $3 \times 10$  mL). The combined organic layers were dried over anhydrous  $Na_2SO_4$  and then concentrated under vacuum. The residue was purified by flash column chromatography on silica gel (eluent: petroleum ether/ ethyl acetate = 1/1) to afford the product **7** (20.7 mg, 51% yield, 92% *ee*) as a colorless oil.  $[\alpha]_D^{20} = +11.26$  ( $c = 0.5$  in  $CHCl_3$ ); 92% *ee*, determined by HPLC analysis (Chiralpak IC-3 column,  $n$ -Hexane/*i*-PrOH = 60:40 (v/v), flow rate 0.2 mL/min,  $\lambda = 254$  nm, 25 °C),  $t_R$  (major) = 31.53 min;  $t_R$  (minor) = 32.94 min;  **$^1H$  NMR (500 MHz, Chloroform-*d*)**  $\delta$  8.21-8.19 (m, 1H), 8.04-8.02 (m, 1H), 7.95-7.94 (m, 1H), 7.54-7.49 (m, 2H), 7.40-7.39 (m, 1H), 7.32-7.23 (m, 4H), 7.17-7.15 (m, 3H), 7.07-7.06 (m, 1H), 6.83-6.80 (m, 1H), 6.41-6.39 (m, 1H), 5.50-5.47 (m, 1H), 4.43-4.40 (m, 1H) ppm.  **$^{13}C$  NMR (125 MHz, Chloroform-*d*)**  $\delta$  192.5, 144.6, 137.4, 136.3, 134.2, 131.6, 130.6, 129.5, 128.4, 128.3, 128.1, 128.0, 127.5, 126.7, 126.4, 126.1, 124.1, 121.6, 119.5, 82.7, 46.9 ppm. **HRMS** (ESI)  $m/z$  calculated for  $C_{26}H_{20}N_3S^+$   $[M+H]^+$ : 406.1372, found 406.1379.

### 4.4 Procedure for synthesis of 8a, 8b, 8c, 8d.

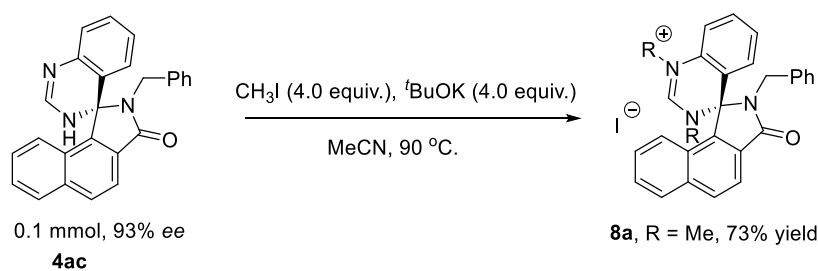

**Synthesis of **8a**** <sup>[8]</sup>: In an N<sub>2</sub>-filled glovebox, to a 10 mL Schlenk tube equipped with an oven-dried stirring bar were added the **4ac** (38.9 mg, 0.1 mmol, 1.0 equiv.), <sup>t</sup>BuOK (44.8 mg, 0.4 mmol, 4.0 equiv.), dry MeCN (1.0 mL), and CH<sub>3</sub>I (56.8 mg, 0.4 mmol, 4.0 equiv.). And the reaction mixture was stirred at 90 °C for 24 h. Then, the reaction mixture cooled to room temperature and concentrated under vacuum. The residue was purified by flash column chromatography on silica gel (eluent: DCM/ CH<sub>3</sub>OH = 20/1) to afford the product **8a** (39.6 mg, 73% yield) as a brown solid. <sup>1</sup>H NMR (500 MHz, Chloroform-*d*) δ 10.05 (s, 1H), 8.19 (d, *J* = 8.0 Hz, 1H), 8.06-8.01 (m, 2H), 7.64-7.56 (m, 2H), 7.50 (d, *J* = 8.0 Hz, 1H), 7.45-7.41 (m, 1H), 7.31-7.29 (m, 1H), 7.21-7.19 (m, 3H), 7.14-7.12 (m, 2H), 7.03 (t, *J* = 7.5 Hz, 1H), 6.48 (d, *J* = 8.0 Hz, 1H), 4.99 (d, *J* = 15.5 Hz, 1H), 4.39 (d, *J* = 15.5 Hz, 1H), 4.05 (s, 3H), 2.81 (s, 3H). <sup>13</sup>C NMR (125 MHz, Chloroform-*d*) δ 167.1, 153.2, 140.7, 136.3, 135.2, 133.4, 132.5, 131.7, 130.0, 129.8, 129.4, 129.2, 129.0, 128.7, 128.4, 128.4, 127.5, 126.0, 122.7, 119.4, 119.3, 115.3, 79.1, 43.6, 39.2, 36.1. HRMS (ESI) *m/z* calculated for C<sub>28</sub>H<sub>24</sub>N<sub>3</sub>O [M-I]: 418.1914, found 418.1915.

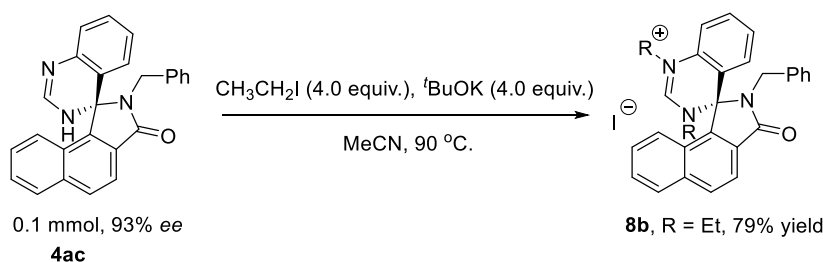

**Synthesis of **8b**** <sup>[8]</sup>: In an N<sub>2</sub>-filled glovebox, to a 10 mL Schlenk tube equipped with an oven-dried stirring bar were added the **4ac** (38.9 mg, 0.1 mmol, 1.0 equiv.), <sup>t</sup>BuOK (44.8 mg, 0.4 mmol, 4.0 equiv.), dry MeCN (1.0 mL), and CH<sub>3</sub>CH<sub>2</sub>I (62.4 mg, 0.4 mmol, 4.0 equiv.). And the reaction mixture was stirred at 90 °C for 24 h. Then, the reaction mixture cooled to room temperature and concentrated under vacuum. The residue was purified by flash column chromatography on silica gel (eluent: DCM/CH<sub>3</sub>OH = 20/1) to afford the product **8b** (45.2 mg, 79% yield) as a brown solid. <sup>1</sup>H NMR (500 MHz, Chloroform-*d*) δ 10.01 (s, 1H), 8.16 (d, *J* = 8.5 Hz, 1H), 8.04-7.98 (m, 2H), 7.59-7.57 (m, 1H), 7.53-7.50 (m, 1H), 7.40-7.30 (m, 3H), 7.15-7.10 (m, 5H), 6.94 (t, *J* = 7.0 Hz, 1H), 6.43 (d, *J* = 7.5 Hz, 1H), 4.85-4.77 (m, 2H), 4.72-4.65 (m, 1H), 4.45 (d, *J* = 15.5 Hz, 1H), 3.27-3.23 (m, 1H), 2.95-2.88 (m, 1H), 1.76 (t, *J* = 7.5 Hz, 3H), 0.78 (t, *J* = 7.5 Hz, 3H) ppm. <sup>13</sup>C NMR (125 MHz, Chloroform-*d*) δ 167.1, 151.9, 141.6, 136.3, 135.6, 133.4, 131.6, 131.2, 130.0, 129.7,

129.2, 129.0, 128.9, 128.8, 128.4, 128.2, 128.1, 126.4, 122.5, 119.9, 119.3, 115.4, 79.2, 47.6, 44.5, 43.5, 15.0, 14.6 ppm. **HRMS** (ESI)  $m/z$  calculated for  $C_{30}H_{28}N_3O$  [M-I]: 446.2232, found 446.2230.

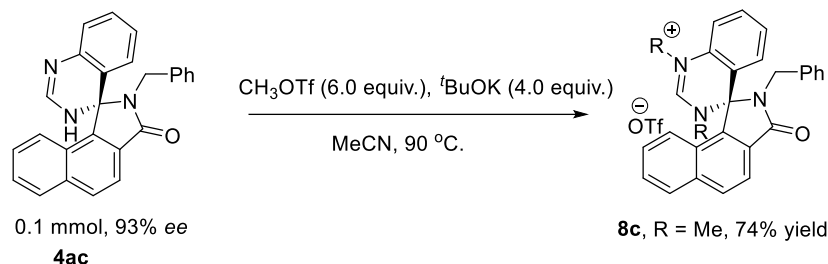

**Synthesis of 8c** [8]: In an N<sub>2</sub>-filled glovebox, to a 10 mL Schlenk tube equipped with an oven-dried stirring bar were added the **4ac** (38.9 mg, 0.1 mmol, 1.0 equiv.), <sup>t</sup>BuOK (44.8 mg, 0.4 mmol, 4.0 equiv.), dry MeCN (1.0 mL), and MeOTf (98.4 mg, 0.6 mmol, 6.0 equiv.). And the reaction mixture was stirred at 90 °C for 24 h. Then, the reaction mixture cooled to room temperature and concentrated under vacuum. The residue was purified by flash column chromatography on silica gel (eluent: DCM/CH<sub>3</sub>OH = 20/1) to afford the product **8c** (42.0 mg, 74% yield) as a brown solid.  $[\alpha]_D^{20} = +41.02$  ( $c = 0.5$  in CHCl<sub>3</sub>); <sup>1</sup>H NMR (500 MHz, Chloroform-*d*)  $\delta$  8.94 (s, 1H), 8.18 (d,  $J = 8.5$  Hz, 1H), 8.04-8.00 (m, 2H), 7.62-7.58 (m, 1H), 7.54-7.51 (m, 1H), 7.43-7.37 (m, 2H), 7.30 (d,  $J = 8.5$  Hz, 1H), 7.20-7.14 (m, 3H), 7.10-7.06 (m, 2H), 7.01 (t,  $J = 8.0$  Hz, 1H), 6.49-6.44 (m, 1H), 4.82 (d,  $J = 15.5$  Hz, 1H), 4.38 (d,  $J = 15.5$  Hz, 1H), 3.92 (s, 3H), 2.69 (s, 3H) ppm. <sup>19</sup>F NMR (471 MHz, Chloroform-*d*)  $\delta$  -78.24 ppm. <sup>13</sup>C NMR (125 MHz, Chloroform-*d*)  $\delta$  167.1, 154.4, 140.7, 136.4, 135.1, 133.5, 132.3, 131.8, 129.9, 129.8, 129.4, 129.2, 129.2, 128.6, 128.4, 128.4, 127.5, 126.2, 122.2, 122.0, 119.5, 119.3, 119.3, 115.6, 79.1, 43.4, 39.4, 36.6 ppm. **HRMS** (ESI)  $m/z$  calculated for  $C_{30}H_{28}N_3O$  [M-OTf]: 418.1914, found 418.1913.

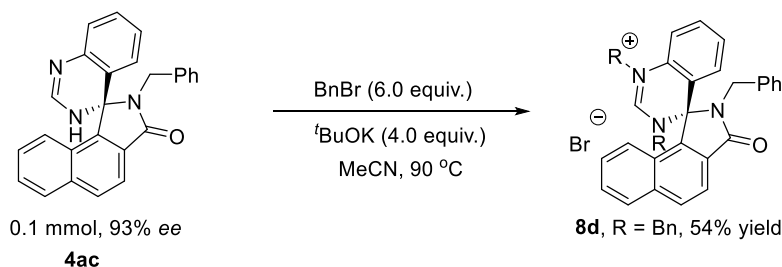

**Synthesis of 8d** [8]: In an N<sub>2</sub>-filled glovebox, to a 10 mL Schlenk tube equipped with an oven-dried stirring bar were added the **4ac** (38.9 mg, 0.1 mmol, 1.0 equiv.), <sup>t</sup>BuOK (44.8 mg, 0.4 mmol, 4.0 equiv.), BnBr (102.6 mg, 0.6 mmol, 6.0 equiv.), and dry MeCN (1.0 mL). And the reaction mixture was stirred at 90 °C for 24 h. Then, the reaction mixture cooled to room temperature

and concentrated under vacuum. The residue was purified by flash column chromatography on silica gel (eluent: DCM/CH<sub>3</sub>OH = 20/1) to afford the product **8d** (34.9 mg, 54% yield) as a brown solid.  $[\alpha]_D^{20} = +102.19$  ( $c = 0.5$  in CHCl<sub>3</sub>); **<sup>1</sup>H NMR (500 MHz, Chloroform-*d*)**  $\delta$  11.3 (s, 1H), 8.07 (d,  $J = 8.5$  Hz, 1H), 8.02 (d,  $J = 8.5$  Hz, 1H), 7.82 (d,  $J = 8.5$  Hz, 1H), 7.67-7.65 (m, 2H), 7.47-7.33 (m, 5H), 7.17-7.13 (m, 2H), 6.99-6.81 (m, 11H), 6.65-6.62 (m, 1H), 6.26-6.24 (m, 1H), 6.00 (d,  $J = 15.5$  Hz, 1H), 5.84 (d,  $J = 15.5$  Hz, 1H), 4.71-4.65 (m, 2H), 4.36 (d,  $J = 15.5$  Hz, 1H), 4.27 (d,  $J = 15.5$  Hz, 1H) ppm. **<sup>13</sup>C NMR (125 MHz, Chloroform-*d*)**  $\delta$  167.2, 154.5, 141.7, 136.2, 136.0, 133.5, 133.46, 132.0, 131.2, 131.1, 129.7, 129.6, 129.3, 129.2, 128.7, 128.6, 128.6, 128.5, 128.5, 128.4, 128.3, 128.2, 128.1, 127.6, 126.6, 122.2, 120.1, 119.2, 116.1, 79.3, 54.8, 53.8, 43.6 ppm. **HRMS** (ESI)  $m/z$  calculated for C<sub>40</sub>H<sub>32</sub>N<sub>3</sub>O [M-Br]: 570.2545, found 570.2548.

#### 4.5 Procedure for synthesis of Rh complex 9.

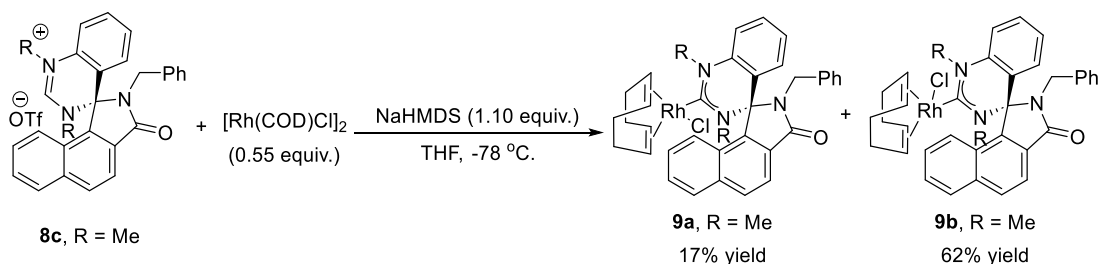

**Synthesis of 9** [8]: In a nitrogen-filled glovebox, a 10 mL Schlenk tube equipped with an oven-dried magnetic stir bar was charged with **8c** (56.7 mg, 0.1 mmol, 1.0 equiv.) and  $[\text{Rh}(\text{COD})\text{Cl}]_2$  (27.1 mg, 0.055 mmol, 0.55 equiv.). Anhydrous THF (2.0 mL) was added, and the resulting mixture was cooled to  $-78^\circ\text{C}$  with stirring for 10 min. Subsequently, a solution of NaHMDS (0.11 mmol, 1.10 equiv.) in THF was added dropwise. The reaction mixture was then allowed to warm to room temperature gradually and stirred for another 24 h. After stirring for 24 h, the solvent was removed under vacuum and the residue dissolved in CH<sub>2</sub>Cl<sub>2</sub> and filtered over celite. The filtrate was removed under vacuum and the residue was purified by flash column chromatography on silica gel (eluent: PE/EA/DCM = 10/1/10) to afford the product **10a** (11.7 mg, 17% yield) and **10b** (43.2 mg, 62% yield) as a brown solid.

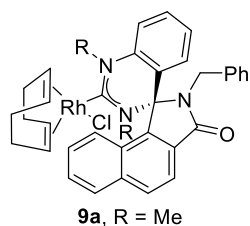

$[\alpha]_D^{20} = -22.44$  ( $c = 0.5$  in  $\text{CHCl}_3$ );  $^1\text{H NMR}$  (500 MHz, **Chloroform-*d***)  $\delta$  8.07 (d,  $J = 8.5$  Hz, 1H), 8.00 (d,  $J = 8.5$  Hz, 1H), 7.93-7.91 (m, 1H), 7.73-7.71 (m, 1H), 7.56-7.50 (m, 2H), 7.21-7.17 (m, 1H), 7.11-7.07 (m, 4H), 7.02-6.97 (m, 2H), 6.73-6.70 (m, 1H), 6.29-6.28 (m, 1H), 4.98-4.88 (m, 2H), 4.77 (s, 3H), 4.40 (d,  $J = 15.5$  Hz, 1H), 4.27 (d,  $J = 15.5$  Hz, 1H), 3.62 (s, 3H), 3.50-3.47 (m, 1H), 2.69-2.62 (m, 1H), 2.57-2.51 (m, 1H), 2.39-2.33 (m, 1H), 7.58-7.55 (m, 1H), 2.29-2.20 (m, 1H), 2.12-2.00 (m, 1H), 1.94-1.83 (m, 2H), 1.77-1.70 (m, 1H) ppm.  $^{13}\text{C NMR}$  (125 MHz, **Chloroform-*d***)  $\delta$  212.4 (d,  $J_{\text{RhC}} = 47.4$  Hz), 168.1, 144.3, 136.6, 136.2, 134.6, 132.0, 130.2, 129.3, 129.0, 128.9, 128.6, 128.5, 127.8, 127.4, 127.1, 126.6, 125.3, 124.3, 119.4, 119.1, 98.0-97.0 (m,  $4 \times \text{COD}_{\text{ol}}$ ), 79.4, 70.0-69.2 (m,  $4 \times \text{COD}_{\text{ol}}$ ), 43.3, 43.3, 40.6, 33.2, 29.9, 29.3, 28.4 ppm. HRMS (ESI)  $m/z$  calculated for  $\text{C}_{36}\text{H}_{35}\text{RhN}_3\text{O}$  [M-Cl]: 628.1385, found 628.1384.

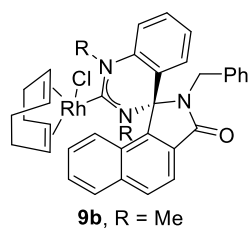

$[\alpha]_D^{20} = +42.52$  ( $c = 0.5$  in  $\text{CHCl}_3$ );  $^1\text{H NMR}$  (500 MHz, **Chloroform-*d***)  $\delta$  8.12 (d,  $J = 8.5$  Hz, 1H), 8.06 (d,  $J = 8.5$  Hz, 1H), 8.01 (d,  $J = 8.0$  Hz, 1H), 7.57-7.53 (m, 1H), 7.35-7.32 (m, 1H), 7.18 (d,  $J = 8.5$  Hz, 1H), 7.11-7.05 (m, 2H), 6.96-6.92 (m, 1H), 6.90-6.89 (m, 3H), 6.70 (d,  $J = 8.0$  Hz, 1H), 6.57-6.54 (m, 1H), 6.16-6.14 (m, 1H), 5.38 (d,  $J = 15.5$  Hz, 1H), 5.13-5.09 (m, 1H), 5.05-5.01 (m, 1H), 4.64 (s, 3H), 4.41 (d,  $J = 15.5$  Hz, 1H), 3.70 (s, 3H), 3.50-3.47 (m, 1H), 3.29-3.25 (m, 1H), 2.56-2.41 (m, 2H), 2.33-2.55 (m, 1H), 2.21-2.15 (m, 1H), 2.04-1.89 (m, 3H), 1.86-1.79 (m, 1H) ppm.  $^{13}\text{C NMR}$  (125 MHz, **Chloroform-*d***)  $\delta$  213.5 (d,  $J_{\text{RhC}} = 47.3$  Hz), 167.0, 143.0, 136.3, 136.1, 134.2, 131.9, 130.2, 129.9, 129.8, 128.4, 128.2, 127.6, 126.9, 126.6, 126.6, 125.0, 122.1, 120.2, 119.9, 112.7, 98.3-98.0 (m,  $4 \times \text{COD}_{\text{ol}}$ ), 78.3, 70.3-69.7 (m,  $4 \times \text{COD}_{\text{ol}}$ ), 42.8, 42.3, 40.0, 32.9, 32.4, 29.0, 28.9 ppm. HRMS (ESI)  $m/z$  calculated for  $\text{C}_{36}\text{H}_{35}\text{RhN}_3\text{O}$  [M-Cl]: 628.1385, found 628.1380.

#### 4.6 Procedure for synthesis of Ir complex 10.

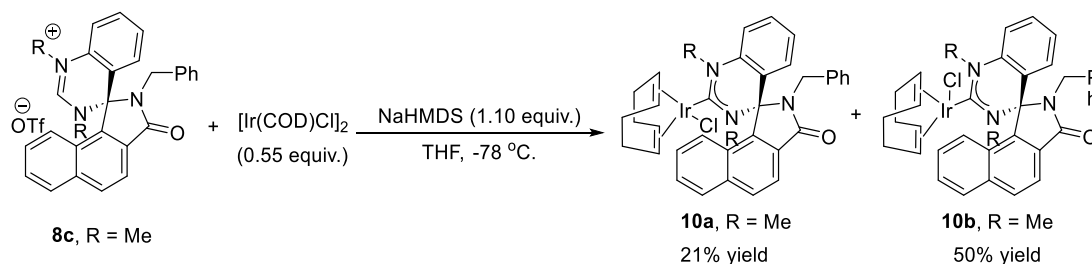

**Synthesis of **10**** <sup>[8]</sup>: In a nitrogen-filled glovebox, a 10 mL Schlenk tube equipped with an oven-dried magnetic stir bar was charged with **8c** (28.4 mg, 0.05 mmol, 1.0 equiv.) and [Ir(COD)Cl<sub>2</sub>] (18.5 mg, 0.028 mmol, 0.55 equiv.). Anhydrous THF (1.0 mL) was added, and the resulting mixture was cooled to -78 °C with stirring for 10 min. Subsequently, a solution of NaHMDS (0.055 mmol, 1.10 equiv.) in THF was added dropwise. The reaction mixture was then allowed to warm to room temperature gradually and stirred for another 24 h. After stirring for 24 h, the solvent was removed under vacuum and the residue dissolved in CH<sub>2</sub>Cl<sub>2</sub> and filtered over celite. The filtrate was removed under vacuum and the residue was purified by flash column chromatography on silica gel (eluent: PE/EA/DCM = 10/1/10) to afford the product **10a** (15.8 mg, 21% yield) and **10b** (37.7 mg, 50% yield) as a brown solid.

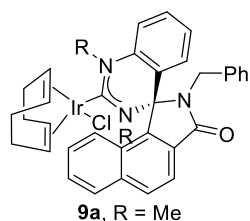

**[ $\alpha$ ]<sub>D</sub><sup>20</sup> = +6.90** (*c* = 0.5 in CHCl<sub>3</sub>); **<sup>1</sup>H NMR (500 MHz, Chloroform-*d*)**  $\delta$  8.07 (d, *J* = 8.4 Hz, 1H), 8.00 (d, *J* = 8.4 Hz, 1H), 7.94-7.92 (m, 1H), 7.73 (d, *J* = 7.8 Hz, 1H), 7.57-7.51 (m, 2H), 7.19-7.16 (m, 1H), 7.09-7.05 (m, 4H), 6.99-6.97 (m, 2H), 6.70 (t, *J* = 7.5 Hz, 1H), 6.28 (d, *J* = 7.8 Hz, 1H), 4.58-4.50 (m, 6H), 4.25 (d, *J* = 15.5 Hz, 1H), 3.40 (s, 3H), 3.18-3.15 (m, 1H), 2.45-2.41 (m, 1H), 2.38-2.20 (m, 2H), 2.13-2.07 (m, 1H), 1.98-1.91 (m, 1H), 1.77-1.66 (m, 3H), 1.48-1.43 (m, 1H) ppm. **<sup>13</sup>C NMR (125 MHz, Chloroform-*d*)**  $\delta$  205.3, 168.0, 144.2, 136.5, 136.2, 135.5, 132.0, 130.2, 129.2, 129.1, 128.8, 128.8, 128.4, 127.9, 127.4, 127.1, 126.7, 125.2, 124.0, 119.3, 119.2, 113.6, 84.0, 82.8, 80.2, 53.6, 53.0, 43.3, 42.8, 40.0, 33.8, 32.6, 29.7, 29.0 ppm. **HRMS (ESI)** *m/z* calculated for C<sub>36</sub>H<sub>35</sub>IrN<sub>3</sub>O<sup>+</sup> [M-Cl]<sup>+</sup>: 718.2404, found 718.2400.

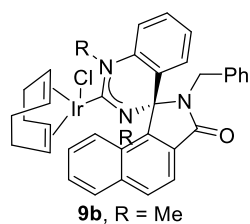

**[ $\alpha$ ]<sub>D</sub><sup>20</sup> = +29.60** (*c* = 0.5 in CHCl<sub>3</sub>); **<sup>1</sup>H NMR (500 MHz, Chloroform-*d*)**  $\delta$  8.12 (d, *J* = 8.4 Hz, 1H), 8.06 (d, *J* = 8.4 Hz, 1H), 8.02 (d, *J* = 8.3 Hz, 1H), 7.58-7.55 (m, 1H), 7.38-7.35 (m, 1H), 7.27-7.25 (m, 2H), 7.11-7.09 (m, 2H), 6.98-6.95 (m, 1H), 6.91-6.88 (m, 3H), 6.70 (d, *J* = 8.3 Hz, 1H), 6.58 (t, *J* = 7.6 Hz, 1H), 6.17 (dd, *J* = 7.9, 1.5 Hz, 1H), 5.42 (d, *J* = 15.6 Hz, 1H), 4.73-4.69 (m, 1H), 4.66-4.62 (m, 1H), 4.43 (s, 3H), 4.38 (d, *J* = 15.7 Hz, 1H), 3.49 (s, 3H), 3.16-3.12 (m, 1H), 2.93-2.89 (m, 1H), 2.38-2.26 (m, 2H), 2.18-2.11 (m, 1H), 2.03-1.96 (m, 1H), 1.79-1.69 (m, 3H), 1.53-1.47 (m, 1H) ppm. **<sup>13</sup>C NMR (125 MHz, Chloroform-*d*)**  $\delta$  205.9, 167.1, 143.2, 136.3, 136.0, 135.1, 131.9, 130.3, 129.9, 129.9, 128.4, 128.2, 128.2, 127.6, 127.0, 126.7, 126.6, 124.9, 122.3, 120.2,

119.9, 113.0, 84.3, 83.8, 79.0, 54.0, 53.4, 42.4, 42.3, 39.4, 33.7, 33.0, 29.6, 29.3 ppm. **HRMS** (ESI)  $m/z$  calculated for  $C_{36}H_{35}IrN_3O^+$   $[M-Cl]^+$ : 718.2404, found 718.2408.

#### 4.7 Procedure for synthesis of Au complex **11**.

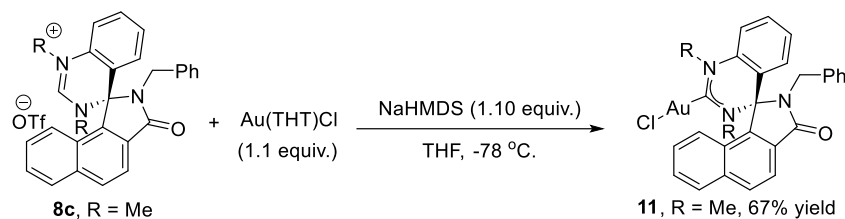

**Synthesis of **12**** <sup>[8]</sup>: In a nitrogen-filled glovebox, a 10 mL Schlenk tube equipped with an oven-dried magnetic stir bar was charged with **8c** (56.7 mg, 0.1 mmol, 1.0 equiv.) and THT(Au)Cl (35.15 mg, 0.11 mmol, 1.1 equiv.). Anhydrous THF (2.0 mL) was added, and the resulting mixture was cooled to -78 °C with stirring for 10 min. Subsequently, a solution of NaHMDS (0.11 mmol, 1.10 equiv.) in THF was added dropwise. The reaction mixture was then allowed to warm to room temperature gradually and stirred for another 24 h. After stirring for 24 h, the solvent was removed under vacuum and the residue dissolved in  $CH_2Cl_2$  and filtered over celite. The filtrate was removed under vacuum and the residue was purified by flash column chromatography on silica gel (eluent: PE/EA = 1/2) to afford the product **11** (43.5 mg, 67% yield) as a white solid.

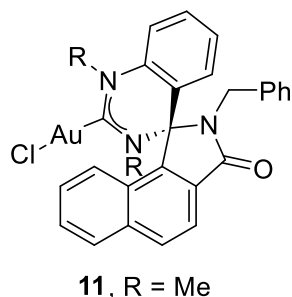

$[\alpha]_D^{20} = +3.62$  ( $c = 0.5$  in  $CHCl_3$ ); **<sup>1</sup>H NMR (500 MHz, Chloroform-*d*)**  $\delta$  8.13 (d,  $J = 8.5$  Hz, 1H), 8.04-7.99 (m, 2H), 7.60-7.56 (m, 1H), 7.45-7.41 (m, 1H), 7.39-7.34 (m, 1H), 7.31-7.29 (m, 1H), 7.24-7.21 (m, 4H), 7.09-7.05 (m, 2H), 6.96-6.93 (m, 1H), 6.42-6.40 (m, 1H), 4.85 (d,  $J = 15.0$  Hz, 1H), 4.24 (s, 3H), 4.05 (d,  $J = 15.0$  Hz, 1H), 2.80 (s, 3H) ppm.

**<sup>13</sup>C NMR (125 MHz, Chloroform-*d*)**  $\delta$  192.9, 167.1, 143.0, 136.3, 135.2, 134.4, 132.6, 131.1, 129.9, 129.2, 128.9, 128.7, 128.6, 128.6, 128.5, 127.1, 127.0, 126.3, 122.0, 119.6, 119.2, 115.2, 79.0, 45.0, 43.6, 42.1 ppm.

#### 4.8 Procedure for synthesis of Pd complex **13a**.

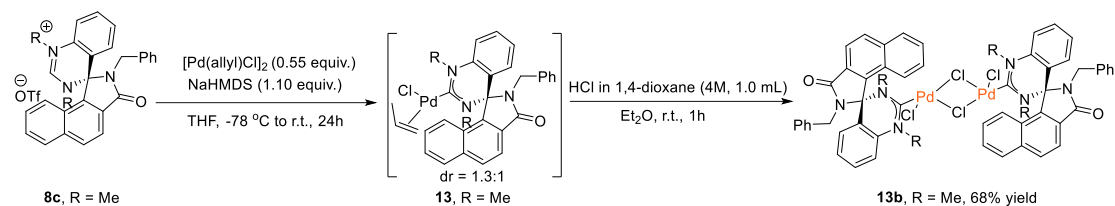

**Synthesis of **13a****<sup>[9]</sup>: In a nitrogen-filled glovebox, a 10 mL Schlenk tube equipped with an oven-dried magnetic stir bar was charged with **8c** (56.7 mg, 0.1 mmol, 1.0 equiv.) and  $[\text{Pd(allyl)Cl}]_2$  (20.12 mg, 0.055 mmol). Anhydrous THF (2.0 mL) was added, and the resulting mixture was cooled to  $-78\text{ }^\circ\text{C}$  with stirring for 10 min. Subsequently, a solution of NaHMDS (0.11 mmol, 1.10 equiv.) in THF was added dropwise. The reaction mixture was then allowed to warm to room temperature gradually and stirred for another 24 h. After stirring for 24 h, the solvent was removed under vacuum and the residue dissolved in  $\text{CH}_2\text{Cl}_2$  and filtered over celite. The filtrate was removed under vacuum and the residue was purified by flash column chromatography on silica gel (eluent: PE/EA = 1/1) to afford the product **13** (81% yield) as a brown solid. (dr was determined by  $^1\text{H}$  NMR analysis.)

A 8-mL vial was charged with **13** (0.081 mol) and HCl in 1,4-dioxane (1.0 mL, 4.0 M). The color of the reaction mixture instantly changed to bright yellow-orange. Diethyl ether (4.0 mL) was added, and the resultant suspension was stirred for 1 h. The solvent was removed in vacuo, which left **13** as a bright yellow-orange powder. Then, the residue was purified by flash column chromatography on silica gel (eluent: PE/EA = 1/2) to afford the product **13a** (40.4 mg, 68% yield) as a yellow solid.

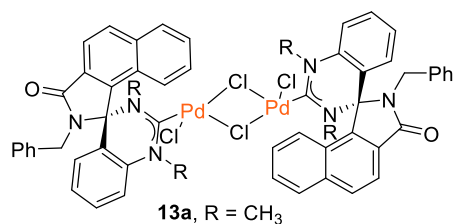

$[\alpha]_{\text{D}}^{20} = +60.14$  ( $c = 1.0$  in  $\text{CHCl}_3$ );  $^1\text{H}$  NMR (500 MHz, **Chloroform-*d***)  $\delta$  8.14-8.08 (m, 2H), 8.03 (d,  $J = 8.0$  Hz, 2H), 7.96 (d,  $J = 8.5$  Hz, 2H), 7.56-7.52 (m, 4H), 7.47-7.43 (m, 2H), 7.06-6.96 (m, 6H), 6.92-6.88 (m, 6H), 6.80 (d,  $J = 8.5$  Hz, 2H), 6.61-6.58 (m, 2H), 6.18-6.16 (m, 2H), 5.38 (d,  $J = 15.5$  Hz, 2H), 4.65 (s, 6H), 4.22 (d,  $J = 15.5$  Hz, 2H), 3.69 (s, 6H) ppm.  $^{13}\text{C}$  NMR (125 MHz, **Chloroform-*d***)  $\delta$  182.7, 167.0, 142.9, 136.2, 135.7, 133.9, 132.2, 129.9, 129.5, 129.3, 128.8, 128.5, 128.3, 127.7, 127.0, 126.8, 126.4, 125.9, 123.4, 120.0, 119.3, 113.2, 79.3, 42.7, 42.4, 40.4 ppm. **HRMS** (ESI)  $m/z$  calculated for  $\text{C}_{56}\text{H}_{46}\text{N}_6\text{O}_2\text{NaCl}_4\text{Pd}_2^+ [\text{M}+\text{Na}]^+$ : 129.0404, found 129.0439.



## References

- [1] Connolly, D.; Lacey, P.; Carthy, M.; Saunders, C.; Carroll, A.; Goddard, R.; Guiry, P. J. *Org. Chem.* **2004**, *69*, 6572-6589.
- [2] Jiang, X.; Xiong, W.; Deng, S.; Lu, F.-D.; Jia, Y.; Yang, Q.; Xue, L.-Y.; Qi, X.; Tunge, J. A.; Lu, L.-Q.; Xiao, W.-J. Construction of axial chirality *via* asymmetric radical trapping by cobalt under visible light. *Nat. Catal.* **2022**, *5*, 788-797.
- [3] Utepova, I. A.; Nemytov, A. I.; Ishkhanian, V. A.; Chupakhin, Q. N.; Charushin, V. N. Metal-free C-H/C-H coupling of 1,3-diazines and 1,2,4-triazines with 2-naphthols facilitated by Brønsted acids. *Tetrahedron* **2020**, *76*, 131391-131400.
- [4] (a) Fang, S.; He, j.; Liu, Z.; Su, Z.; Guo, F.; Wang, T. *ACS Catal.* **2023**, *13*, 13077-13088. (b) Dong, H.; Wang, C. *J. Am. Chem. Soc.* **2023**, *145*, 26747-26755.
- [5] Yamamoto, Y.; Koizumi, T.; Katagiri, K.; Furuya, Y.; Danjo, H.; Imamoto, T.; Yamaguchi, K. Facile Synthesis of Highly Congested 1,2-Diphosphinobenzenes from Bis(phosphine)boronium Salts. *Org. Lett.*, **2006**, *8*, 6104-6106.
- [6] Kuai, C.-S.; Wang, Y.; Yang, T.; Wu, X.-F. Multimodal Precise Control Over Multiselective Carbonylation of 1,3-Enynes. *J. Am. Chem. Soc.* **2025**, *147*, 7950-7964.
- [7] Minetto, G.; Raveglia, L. F.; Sega, A.; Taddei, M. Microwave-Assisted Paal–Knorr Reaction – Three-Step Regiocontrolled Synthesis of Polysubstituted Furans, Pyrroles and Thiophenes. *Eur. J. Org. Chem.*, **2005**, *24*, 5277-5288.
- [8] (a) Makhloufi, A.; Wahl, M.; Frank, W.; Ganter, C. A New Mixed Amino-Amido N-Heterocyclic Carbene Based on Anthranilic Acid. *Organometallics* **2013**, *32*, 854-861. (b) Brüggemann, P.; Wahl, M.; Schwengers, S.; Buhl, Hannes.; Ganter, C. *Organometallics* **2018**, *37*, 4276-4286.
- [9] Scarborough, C. C.; Grady, M. J. W.; Guzei, I. A.; Gandhi, B. A.; Bunel, E. E.; Stahl, S. S. *Angew. Chem. Int. Ed.* **2005**, *44*, 5269-5272.

# NMR Spectra

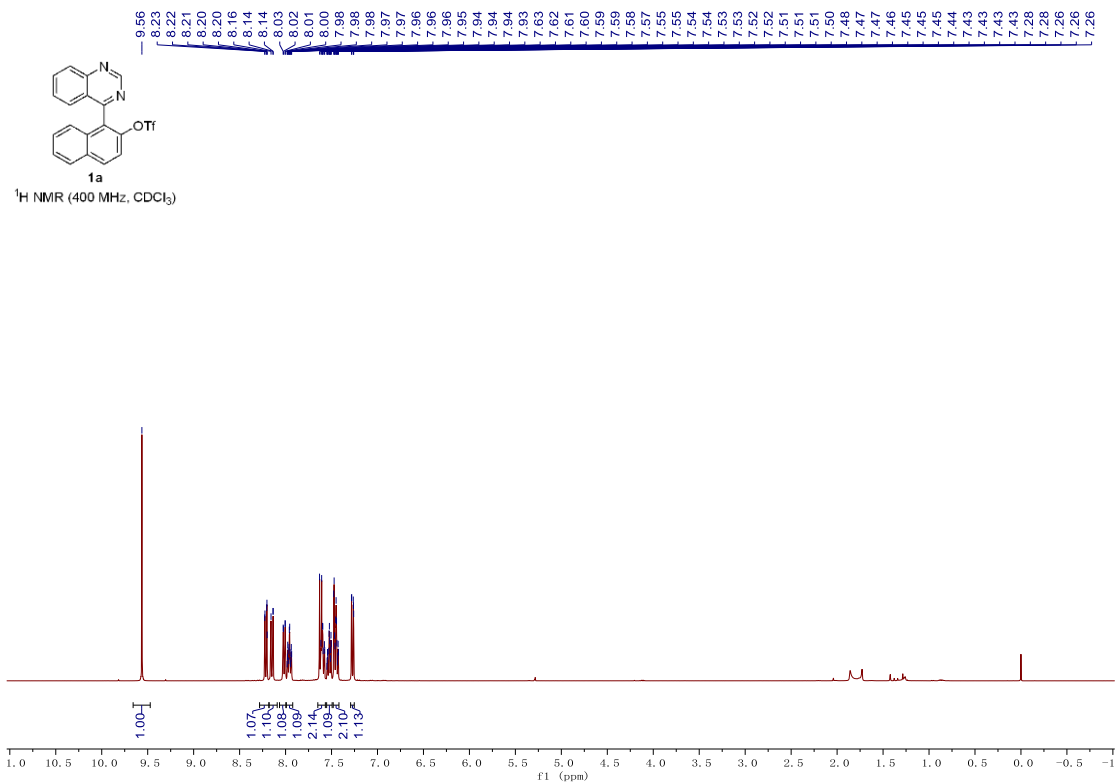

SL-10-157-C, 10, fid

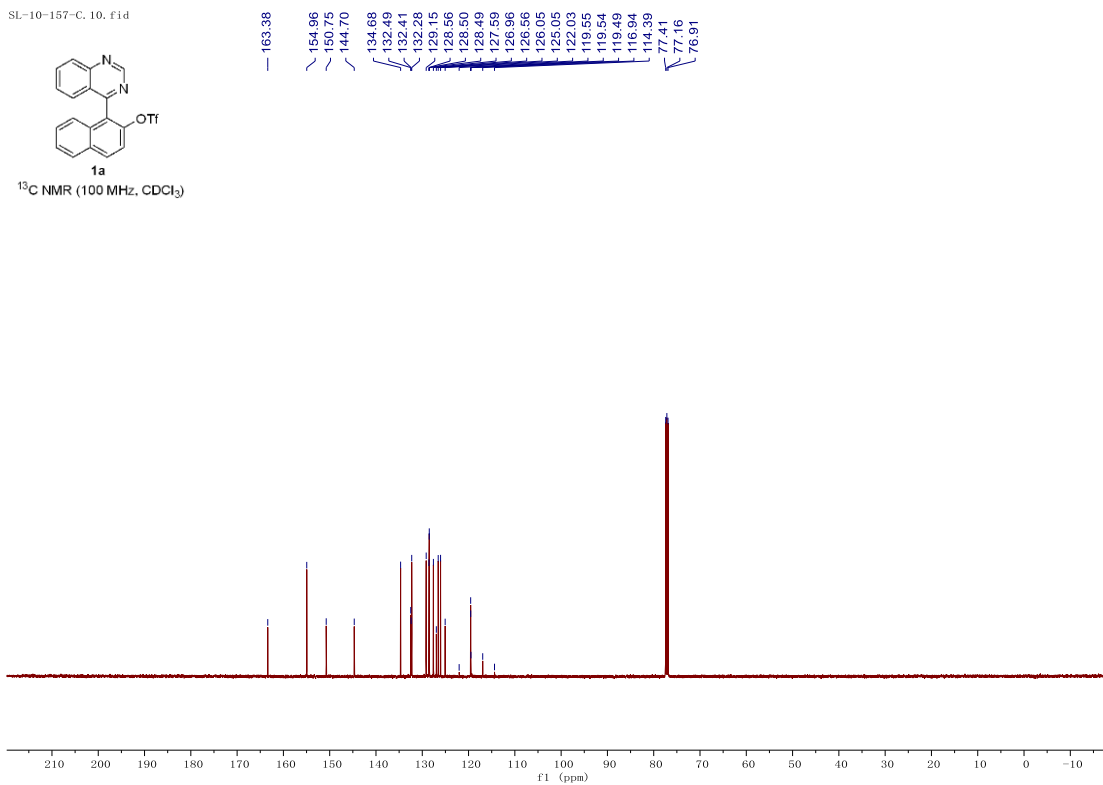

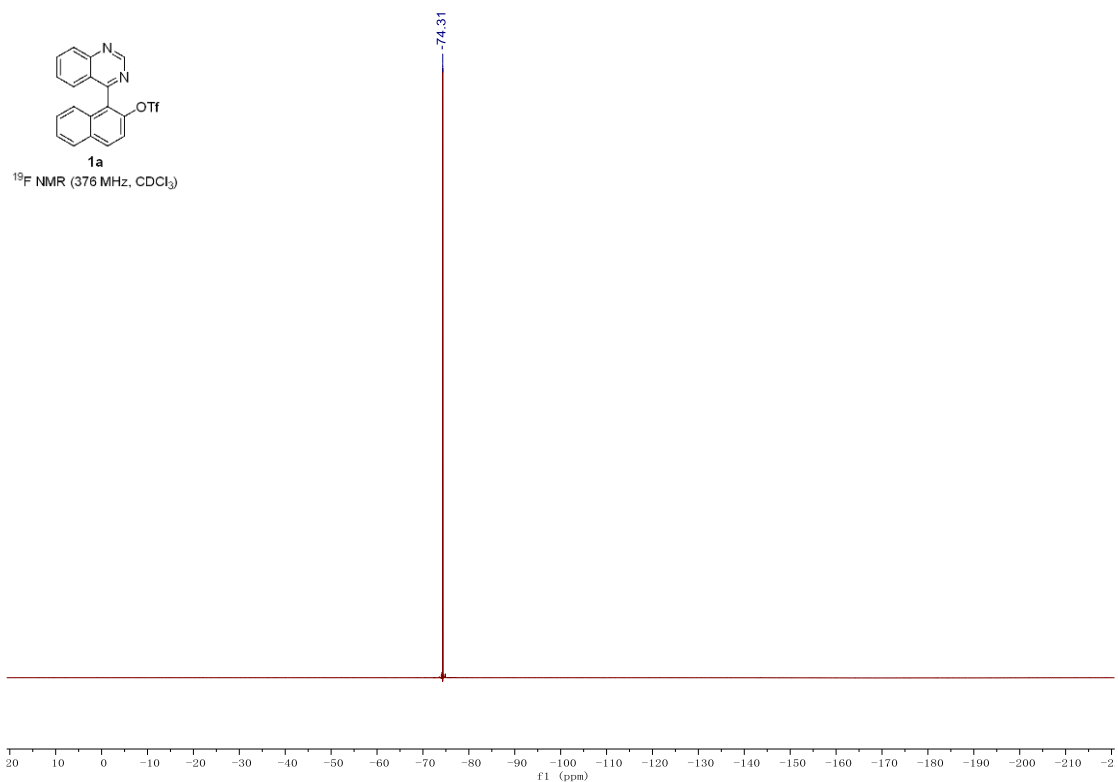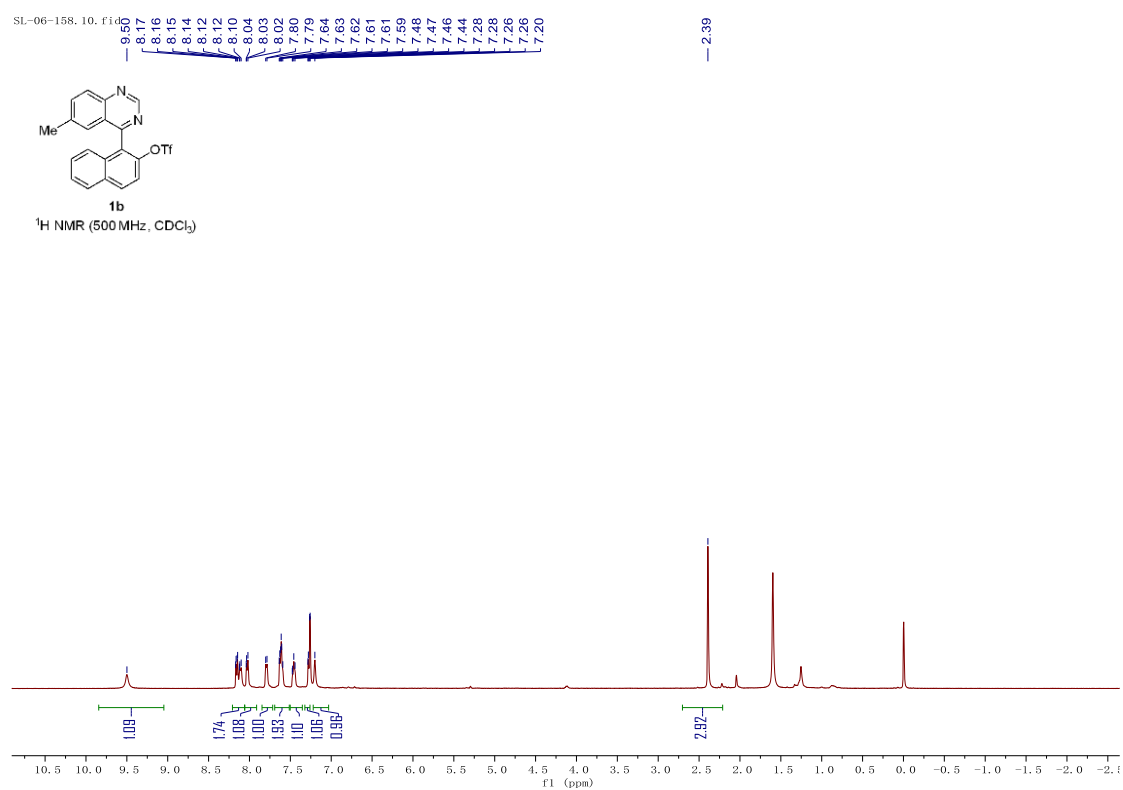

SL-06-158-C, 12, f1d

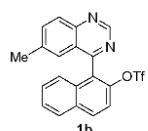

$^{13}\text{C}$  NMR (126 MHz,  $\text{CDCl}_3$ )

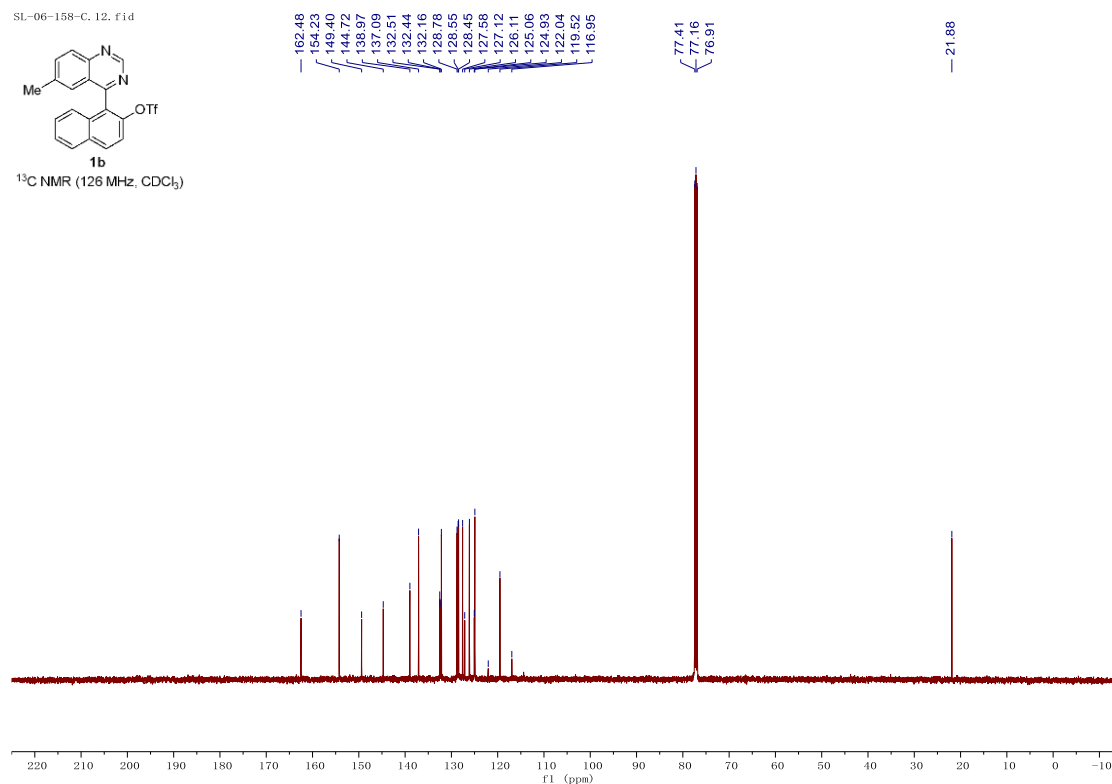

SL-06-158, 11, f1d

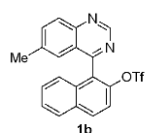

$^{19}\text{F}$  NMR (471 MHz,  $\text{CDCl}_3$ )

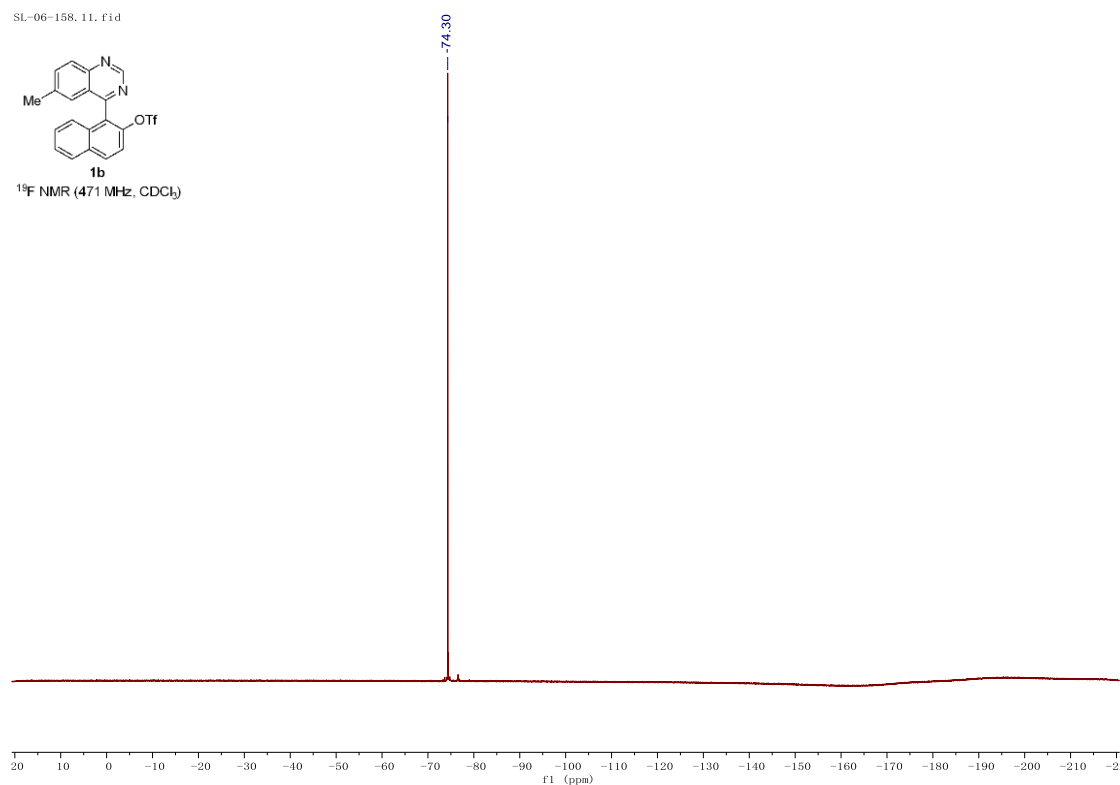

SL-06-159, 10, fid

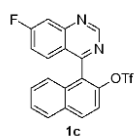

$^1\text{H}$  NMR (500 MHz,  $\text{CDCl}_3$ )

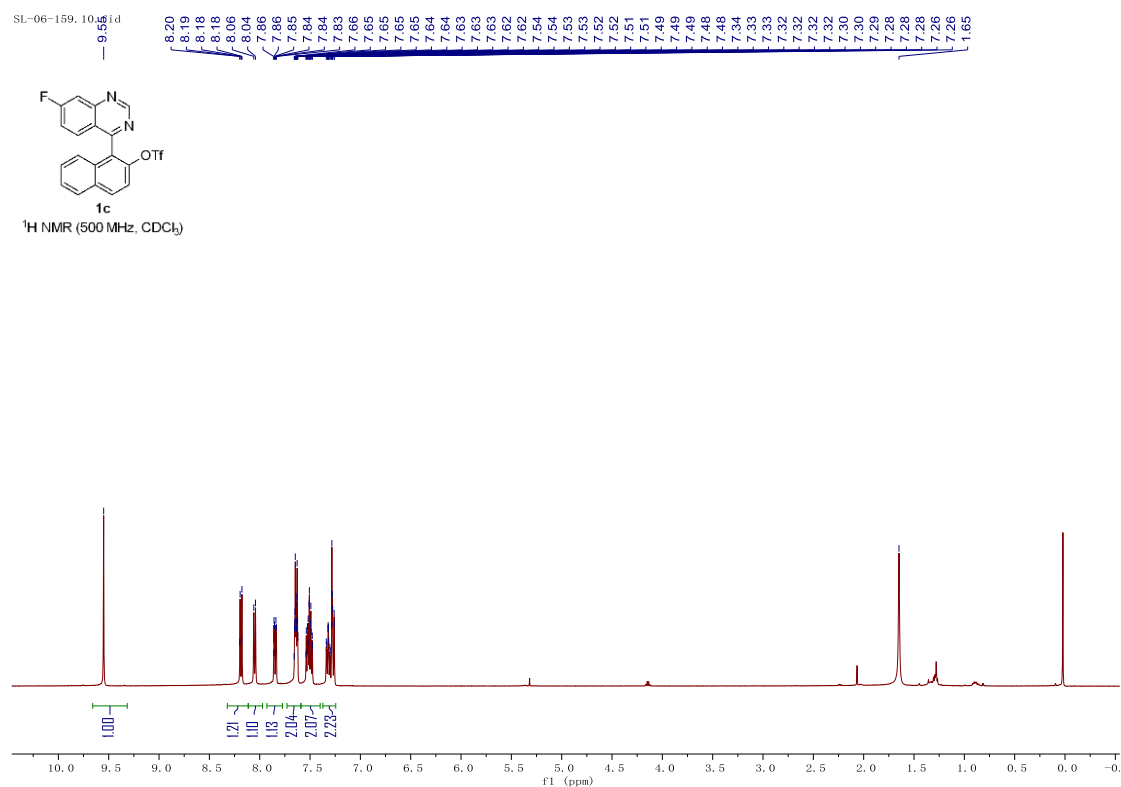

SL-06-159-C, 10, fid

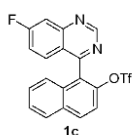

$^{13}\text{C}$  NMR (126 MHz,  $\text{CDCl}_3$ )

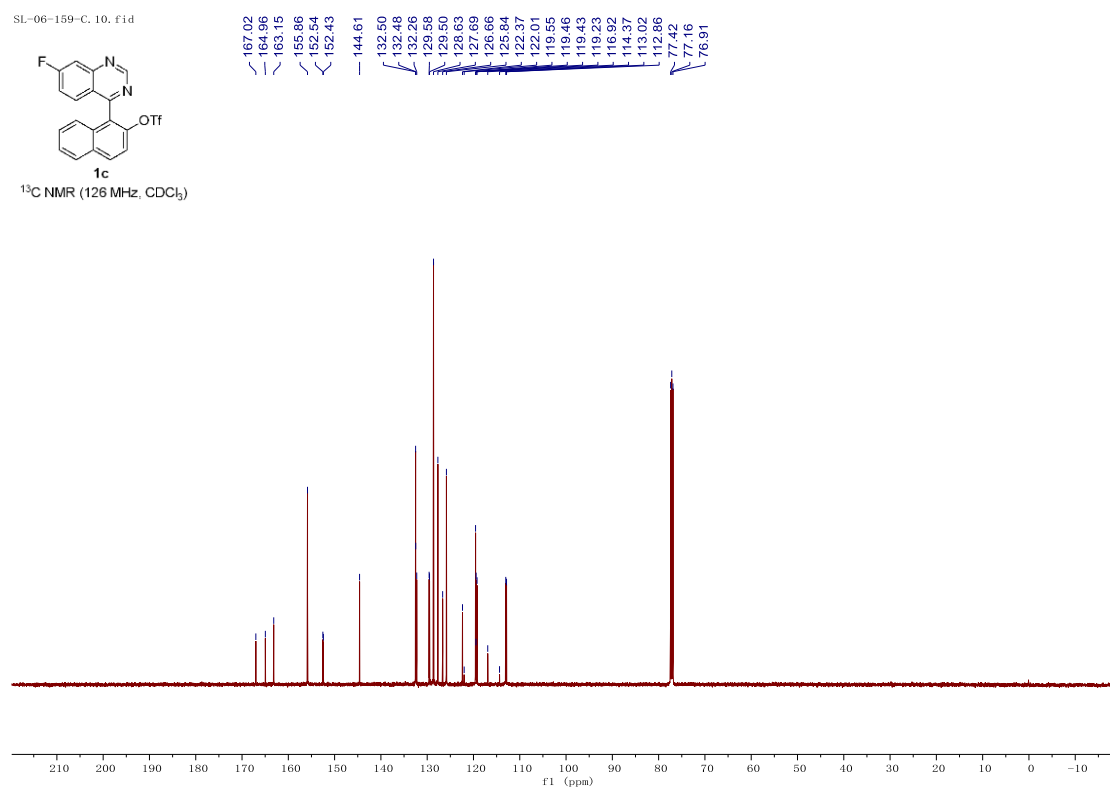

SL-06-159, 11, f1d

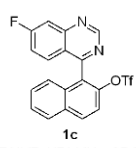

$^{19}\text{F}$  NMR (471 MHz,  $\text{CDCl}_3$ )

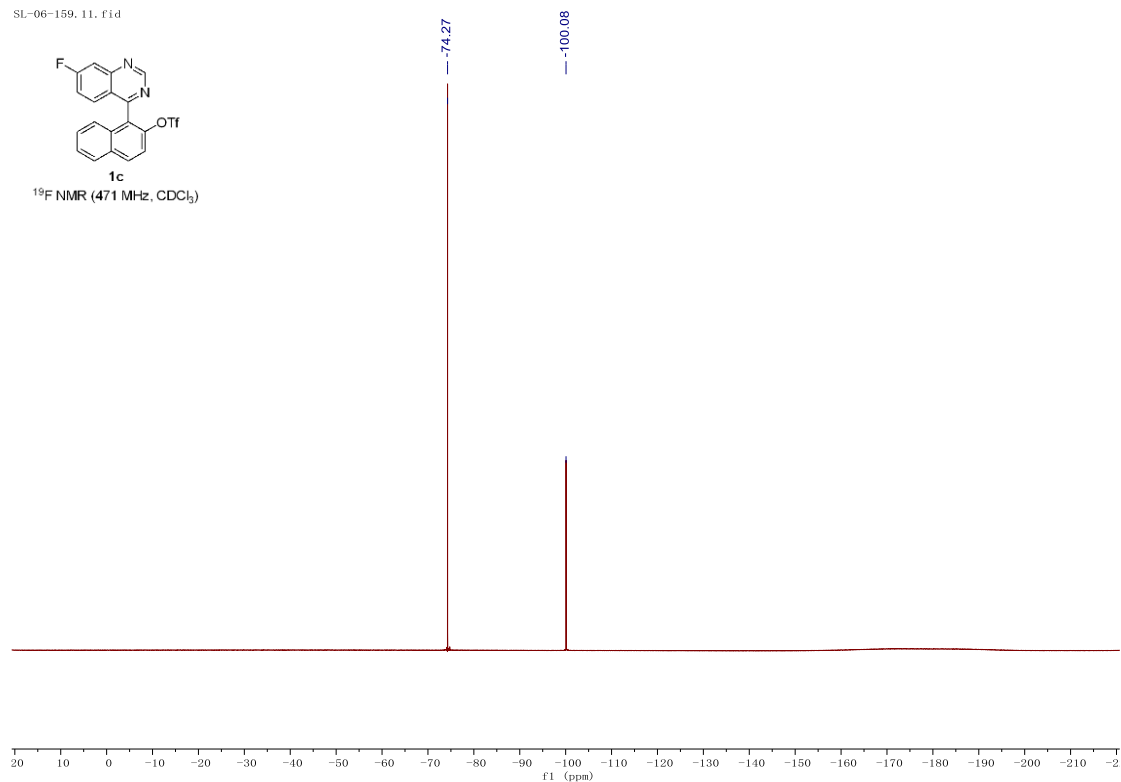

SL-06-181, 10, f1d

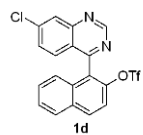

$^1\text{H}$  NMR (500 MHz,  $\text{CDCl}_3$ )

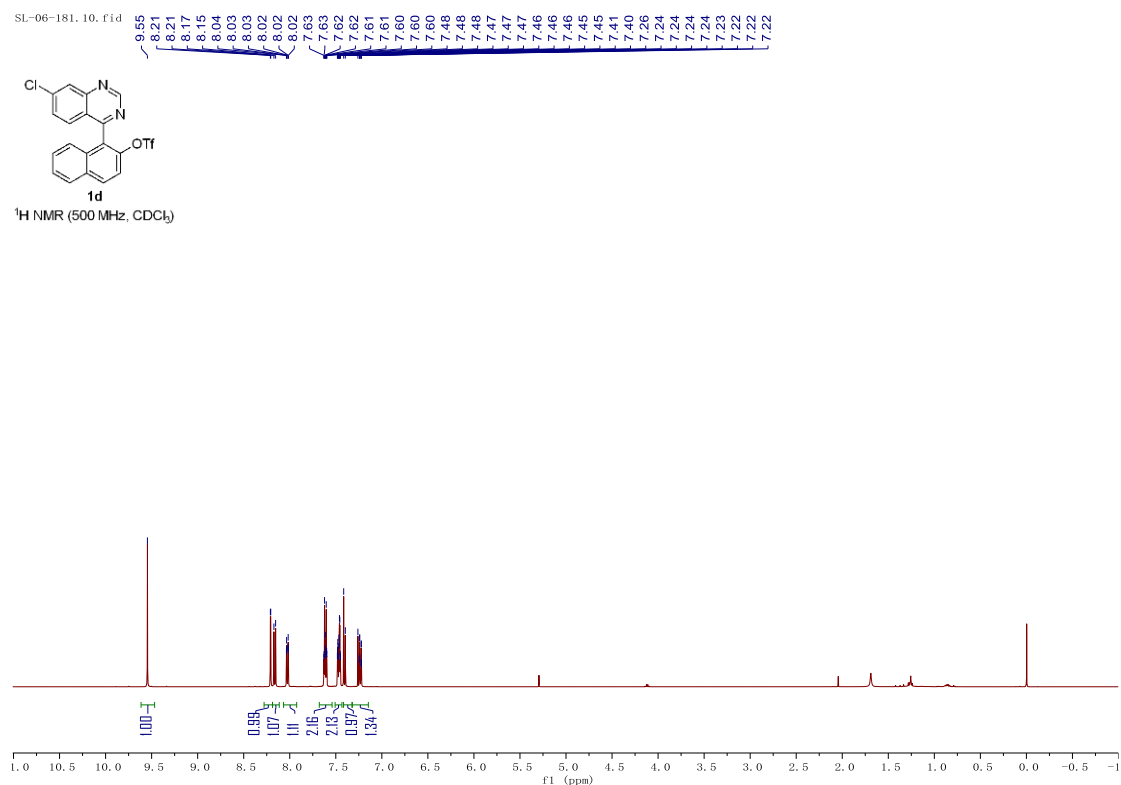

SL-06-181-C, 10, f1d

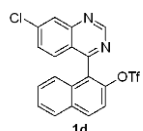

$^{13}\text{C}$  NMR (126 MHz,  $\text{CDCl}_3$ )

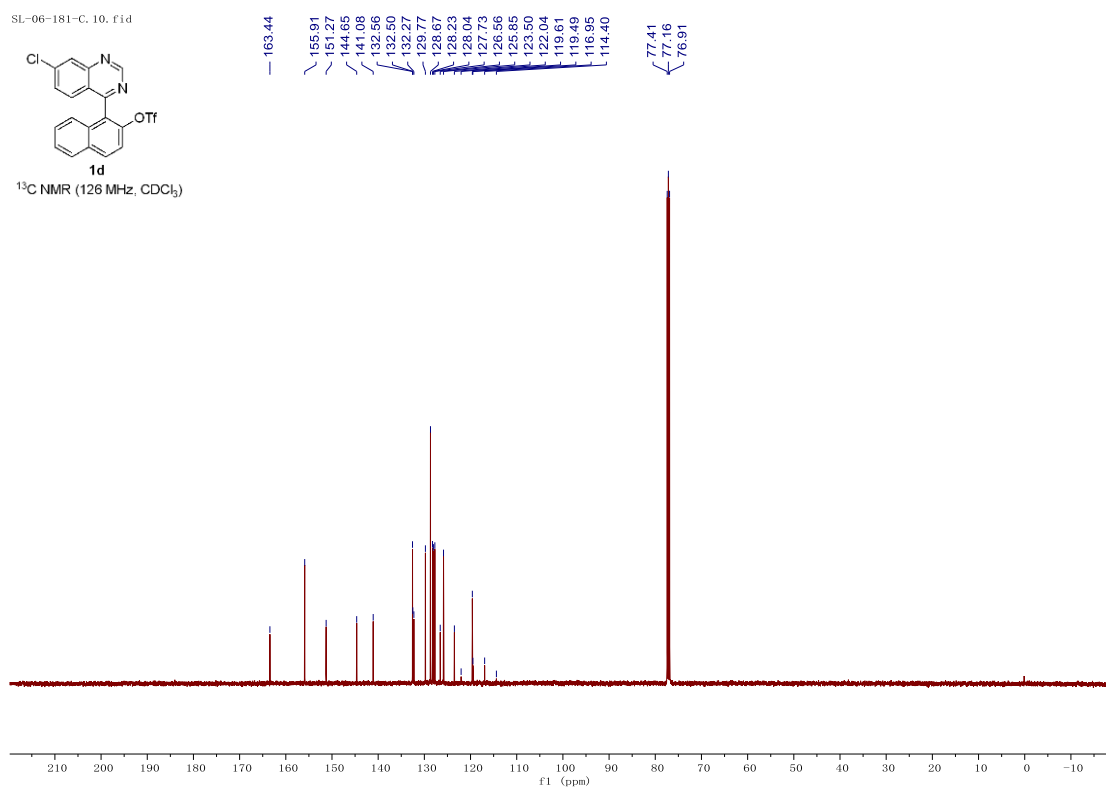

SL-06-181, 11, f1d

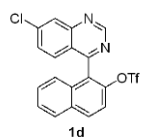

$^{19}\text{F}$  NMR (471 MHz,  $\text{CDCl}_3$ )

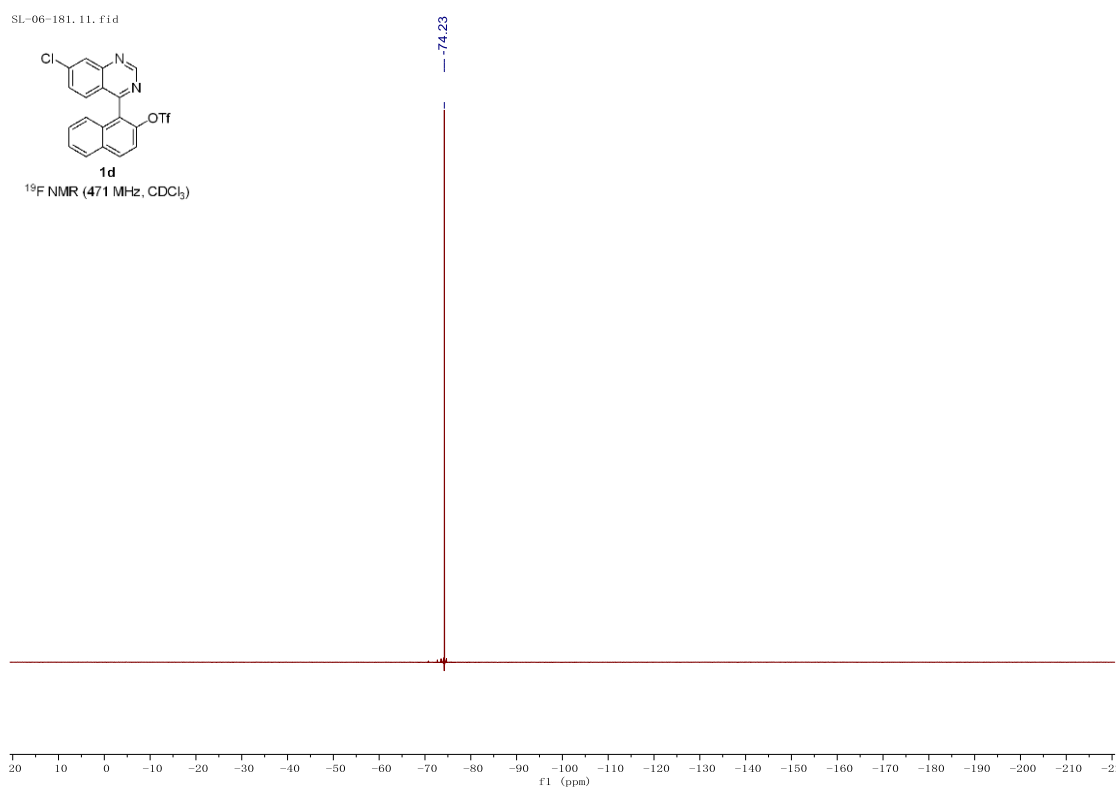

SL-09-159-2-HCF, 23, f1d

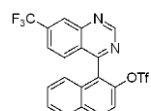

**1e**

$^1\text{H}$  NMR (500 MHz,  $\text{CDCl}_3$ )

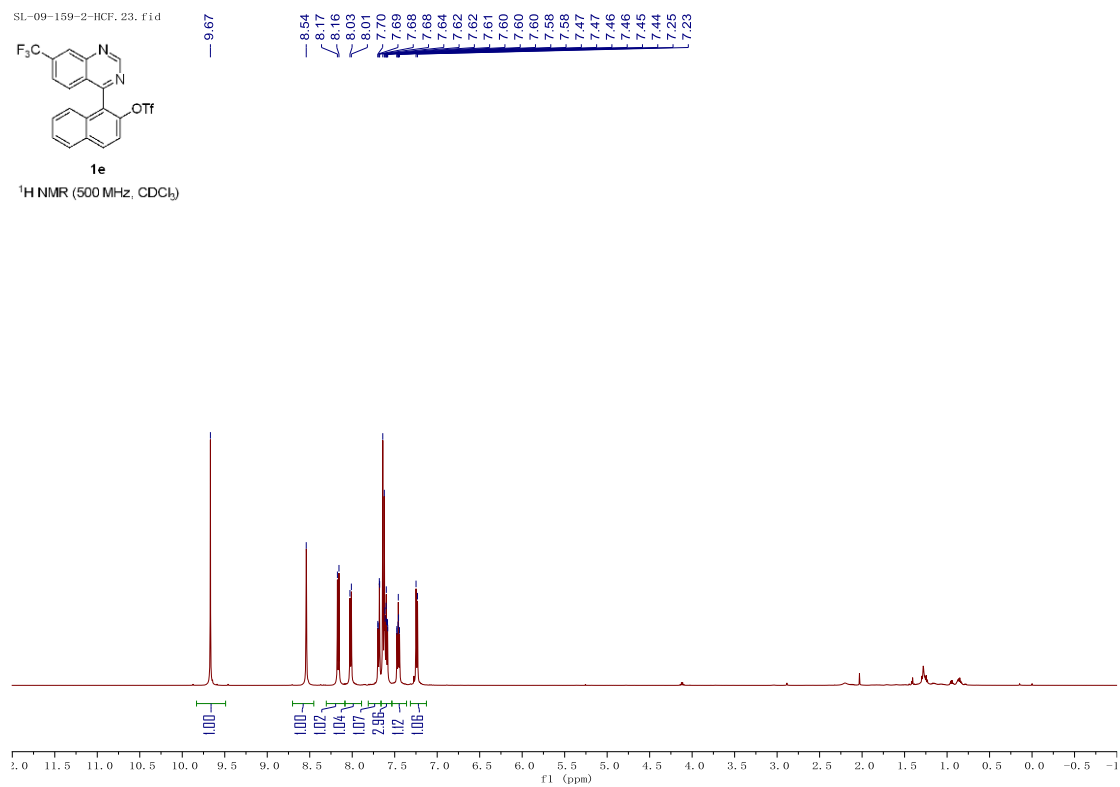

SL-09-159-2-HCF, 25, f1d

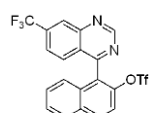

**1e**

$^{13}\text{C}$  NMR (126 MHz,  $\text{CDCl}_3$ )

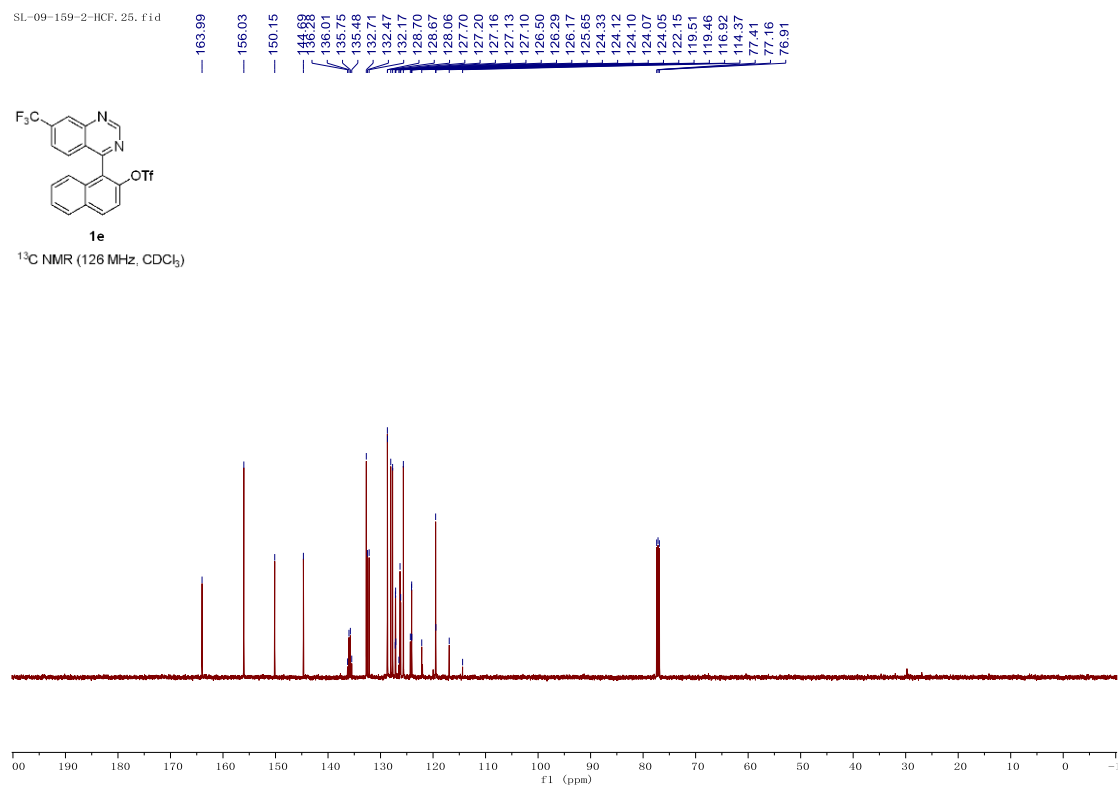



SL-09-159-2-HCF, 24, f1d

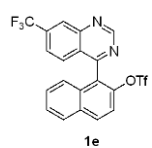

$^{19}\text{F}$  NMR (471 MHz,  $\text{CDCl}_3$ )

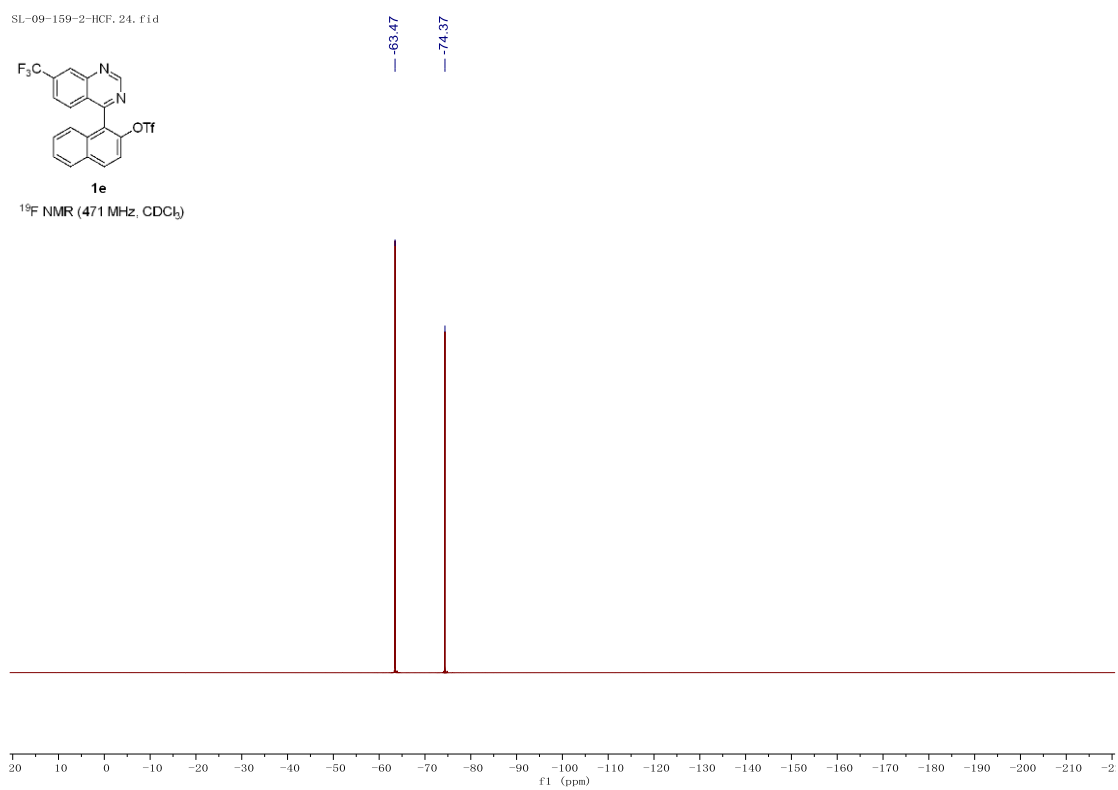

SL-08-38-HF-HCF, 10, f1d

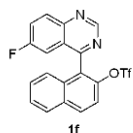

$^1\text{H}$  NMR (500 MHz,  $\text{CDCl}_3$ )

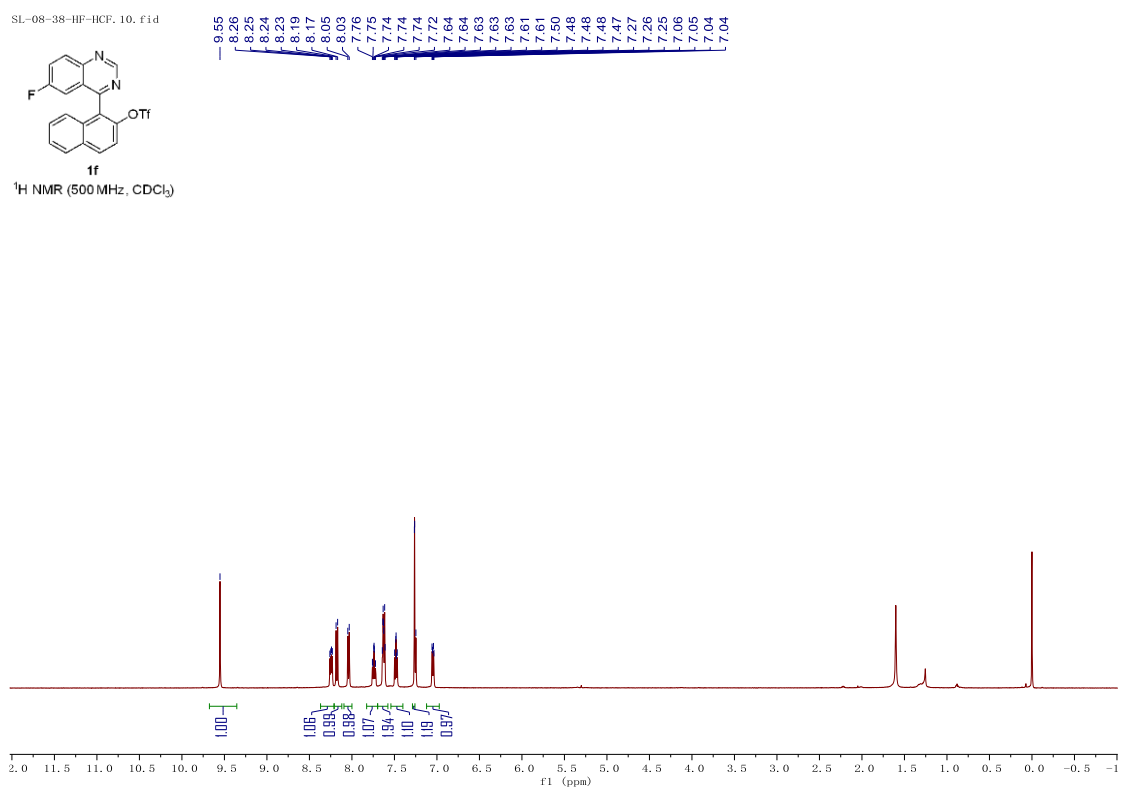

SL-08-38-C.10.fid

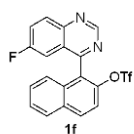

$^{13}\text{C}$  NMR (126 MHz,  $\text{CDCl}_3$ )

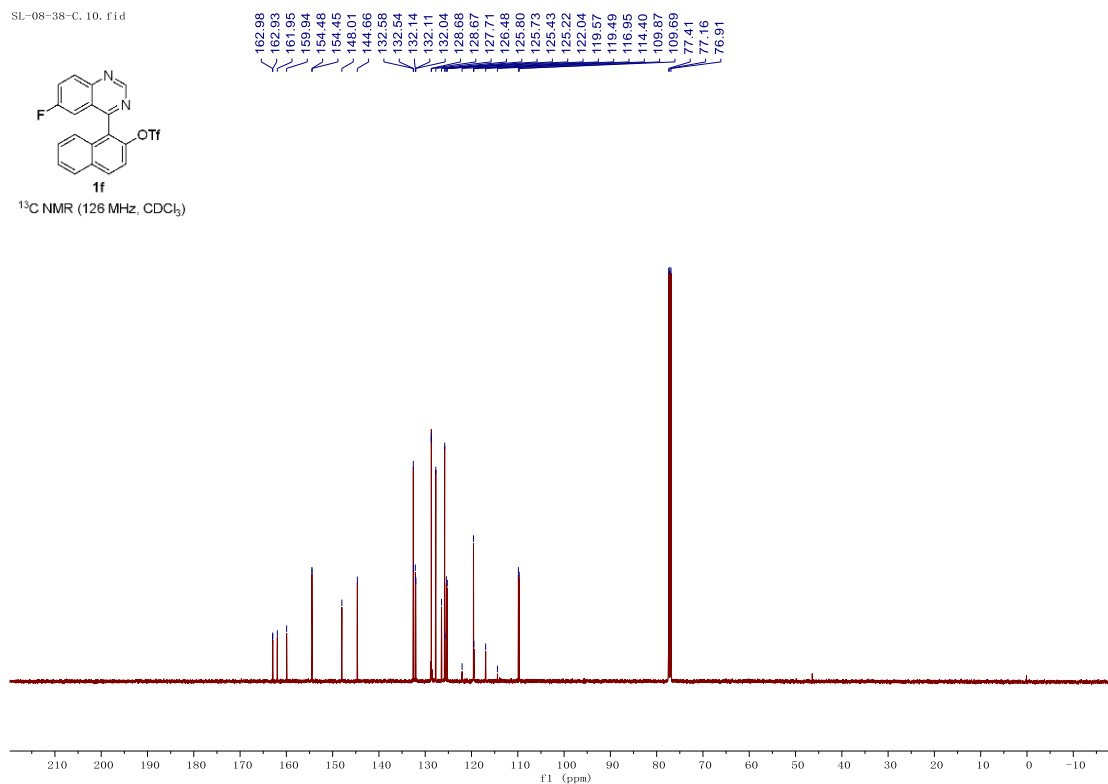

SL-08-38-HF-HCF.11.fid

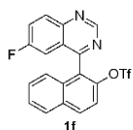

$^{19}\text{F}$  NMR (471 MHz,  $\text{CDCl}_3$ )

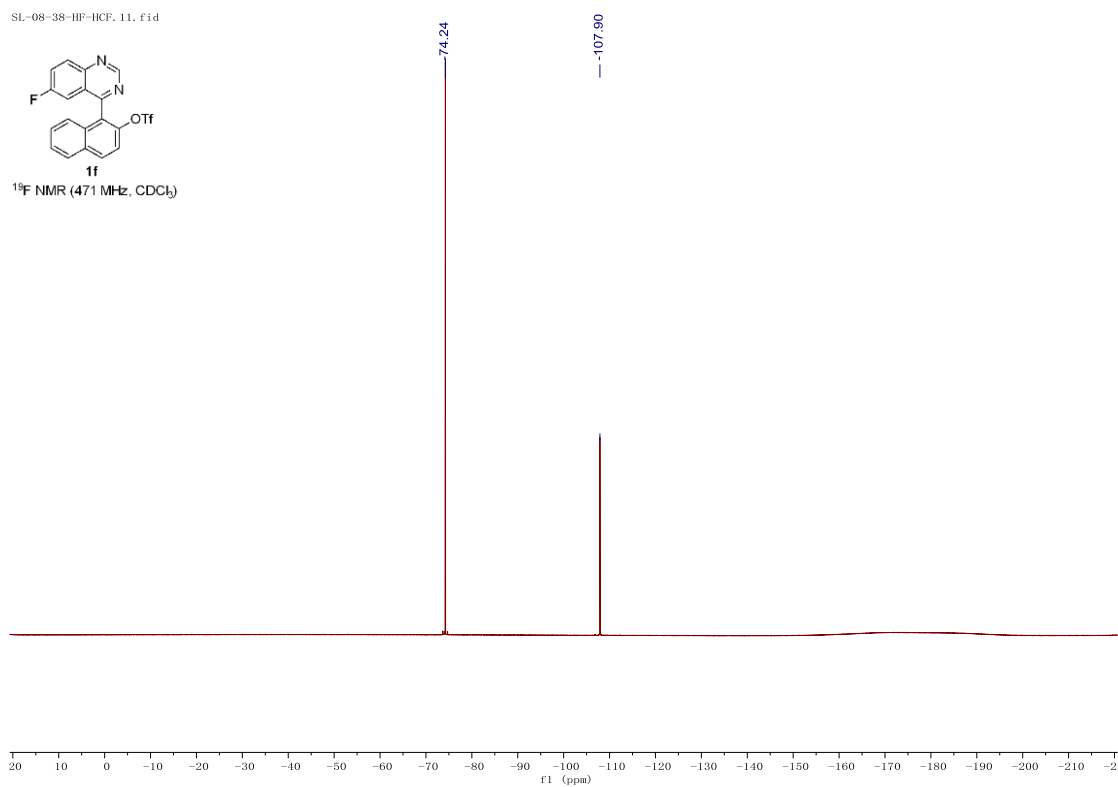

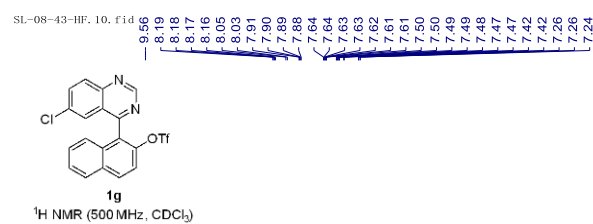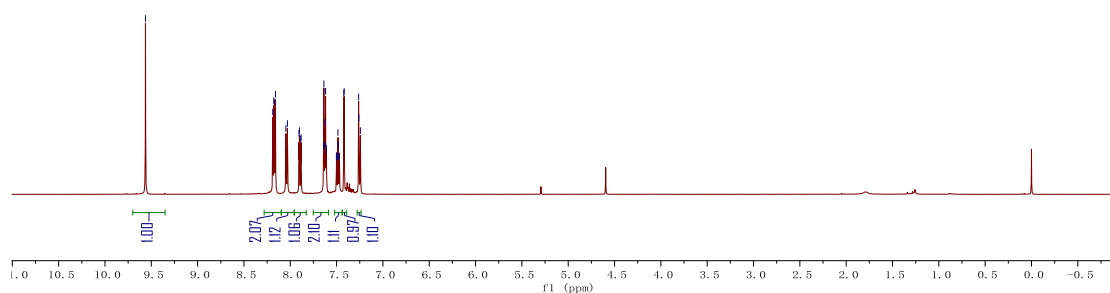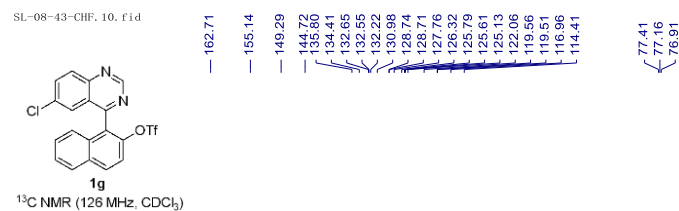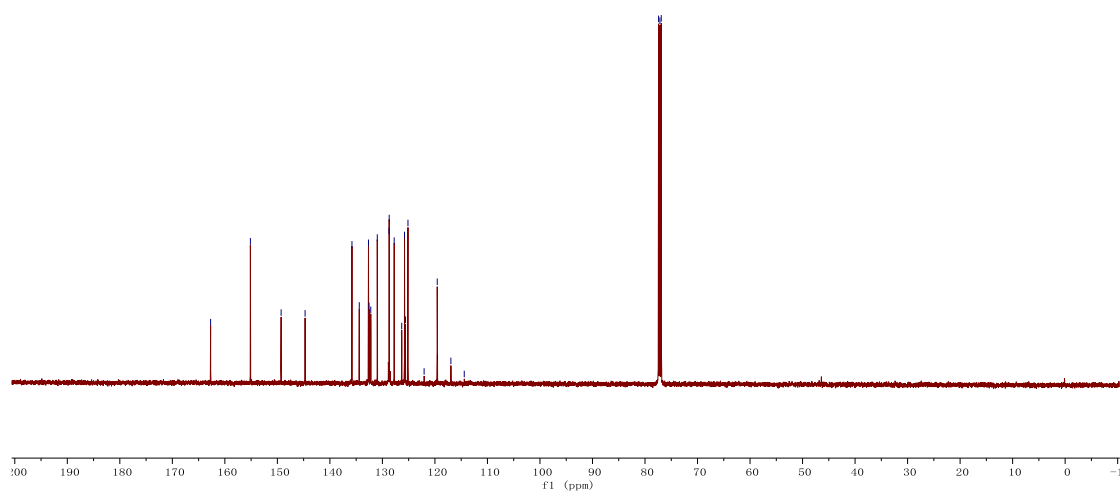

SL-08-43-HF, 11, f1d

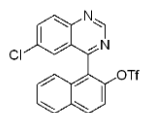

**1g**

$^{19}\text{F}$  NMR (471 MHz,  $\text{CDCl}_3$ )

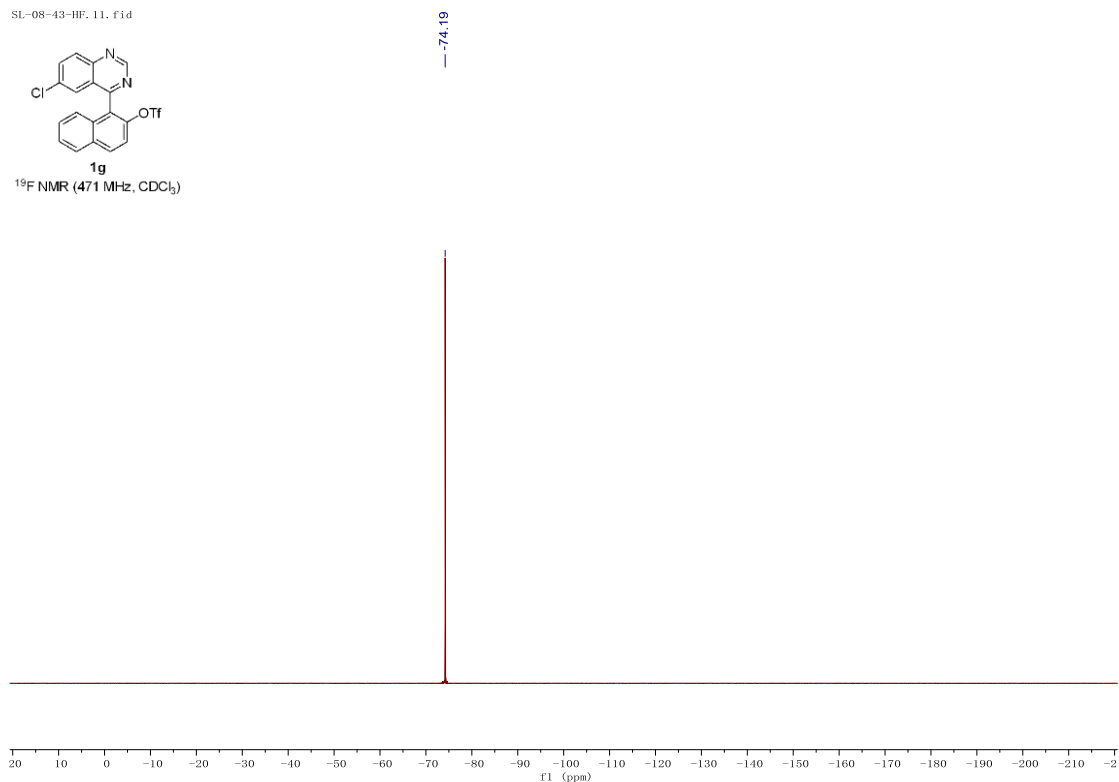

SL-09-159-1-HCF, 10, f1d

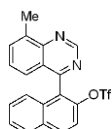

**1h**

$^1\text{H}$  NMR (500 MHz,  $\text{CDCl}_3$ )

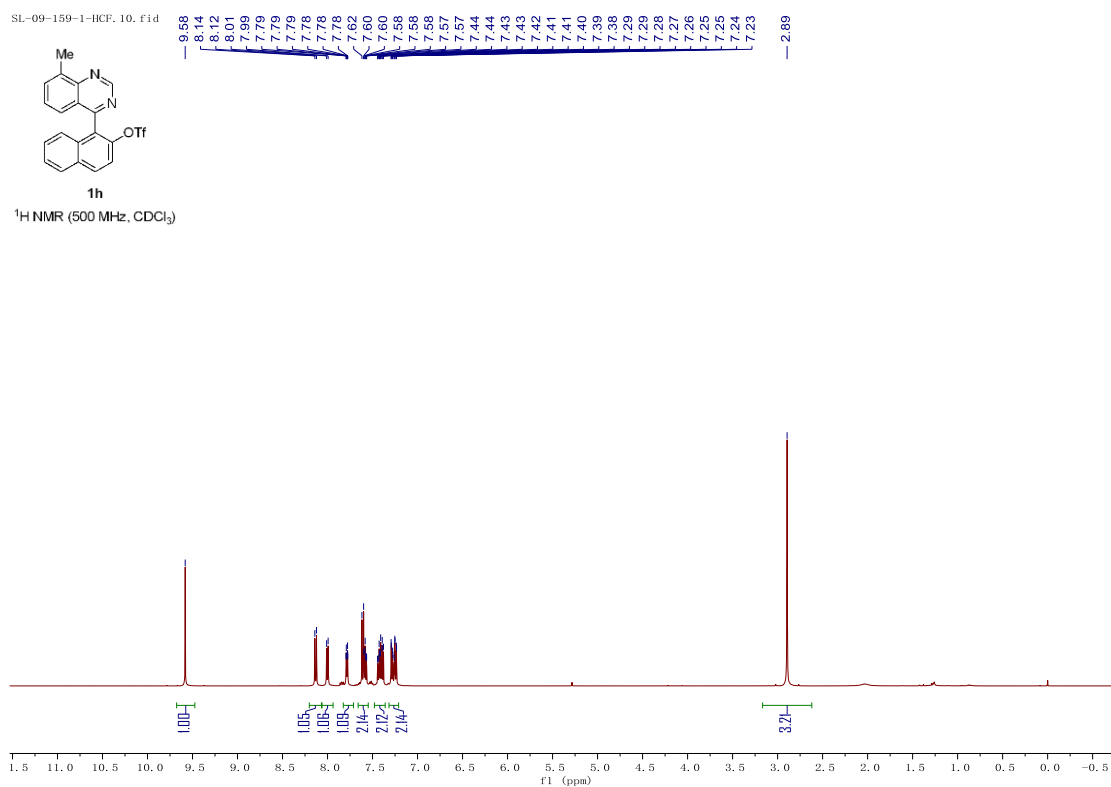

SL-09-159-1-HCF, 12, f1d

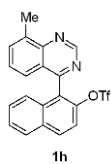

$^{13}\text{C}$  NMR (126 MHz,  $\text{CDCl}_3$ )

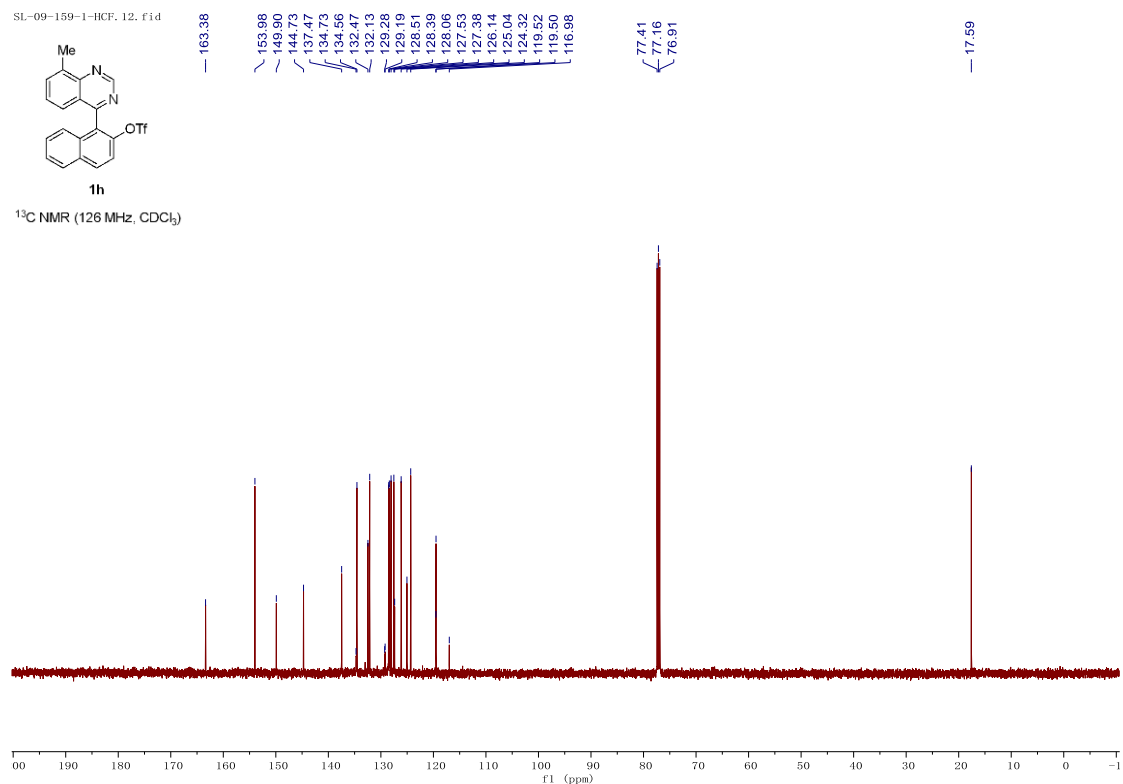

SL-09-159-1-HCF, 11, f1d

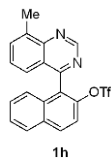

$^{19}\text{F}$  NMR (376 MHz,  $\text{CDCl}_3$ )

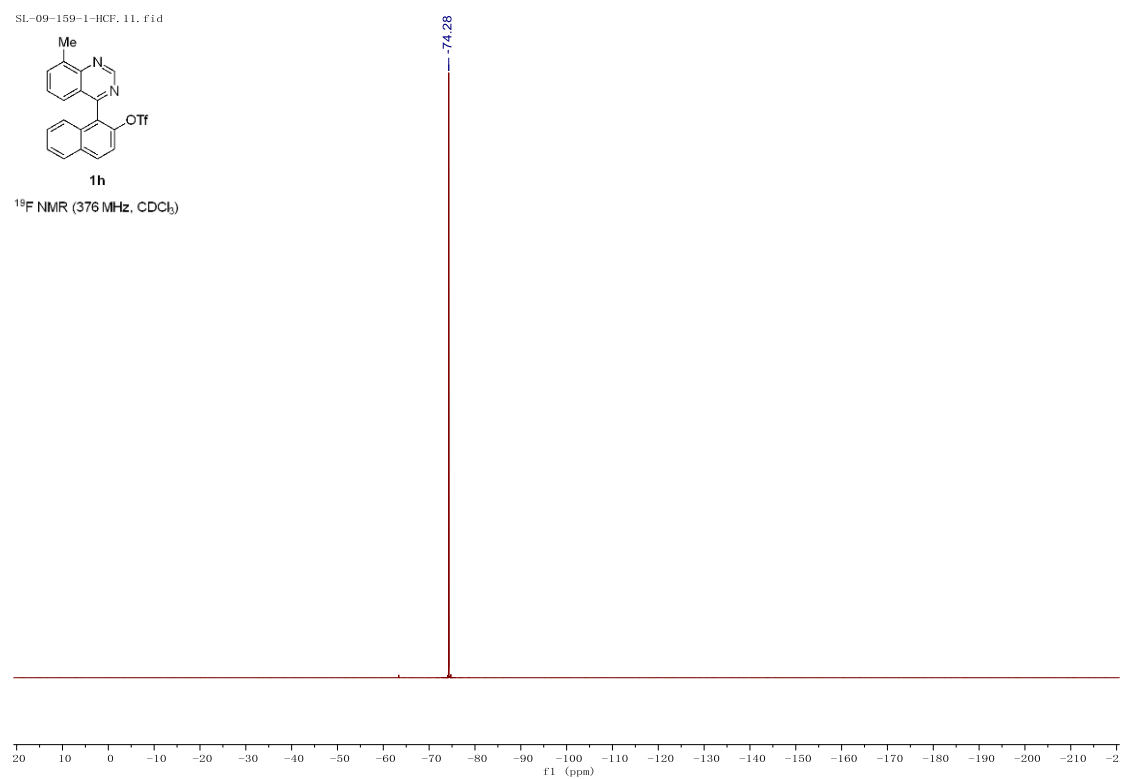

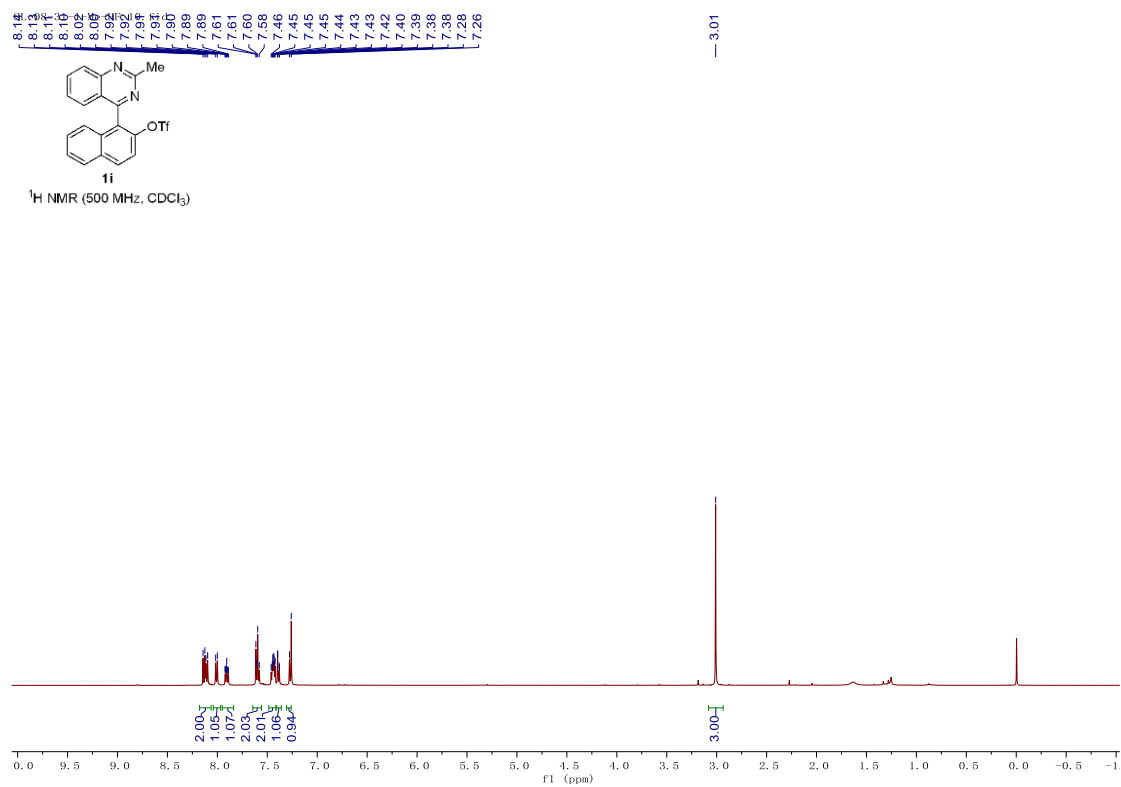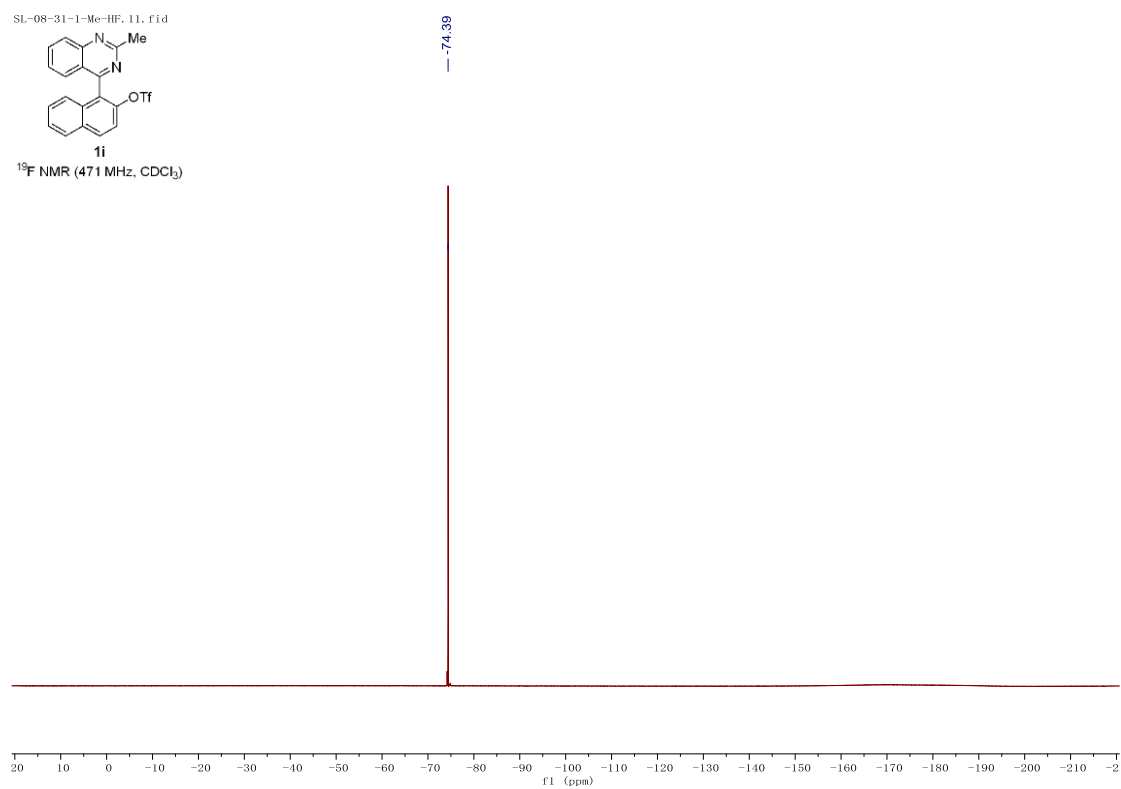

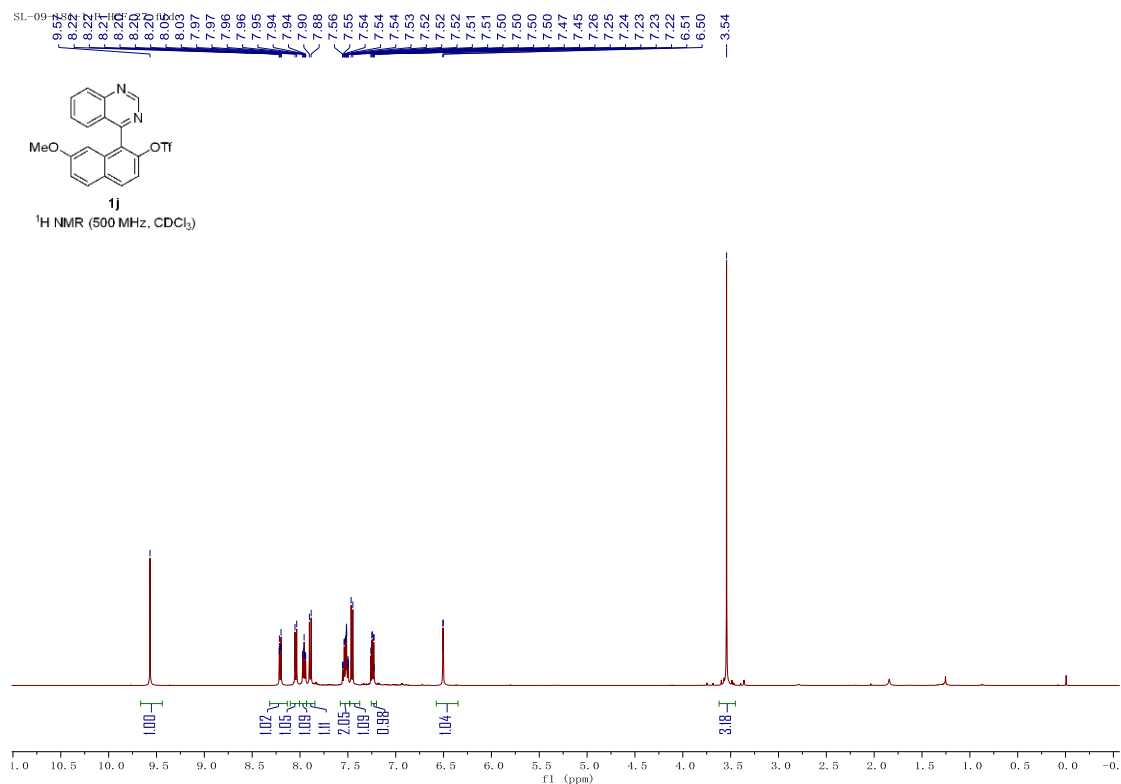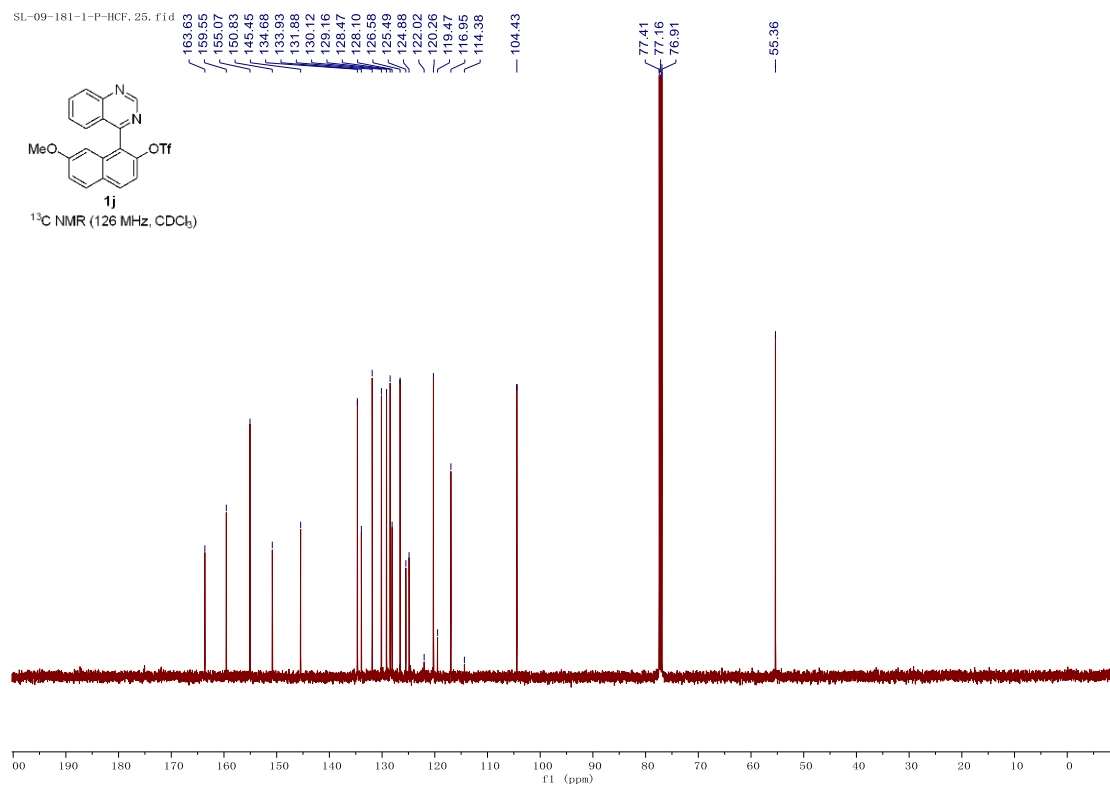

SL-09-181-1-P-HCF, 26, f1d

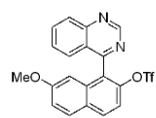

**1j**  
 $^{19}\text{F}$  NMR (471 MHz,  $\text{CDCl}_3$ )

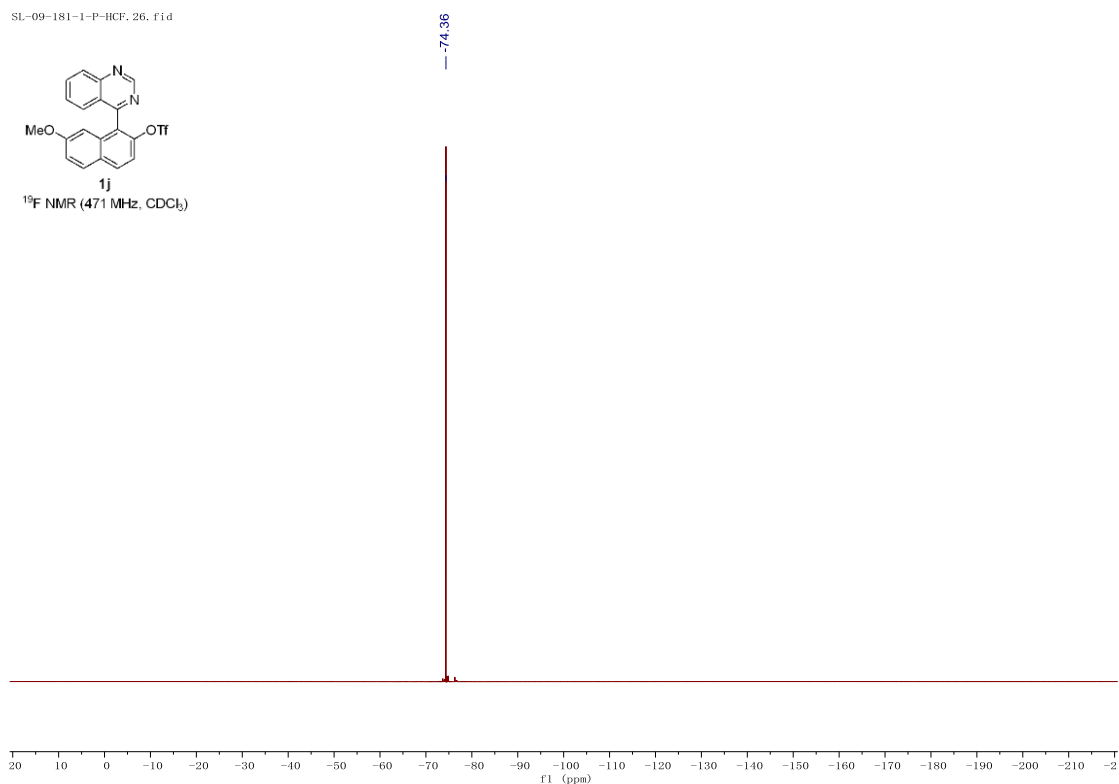

SL-09-181-2-HCF, 23, f1d

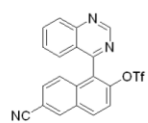

**1k**  
 $^1\text{H}$  NMR (500 MHz,  $\text{CDCl}_3$ )

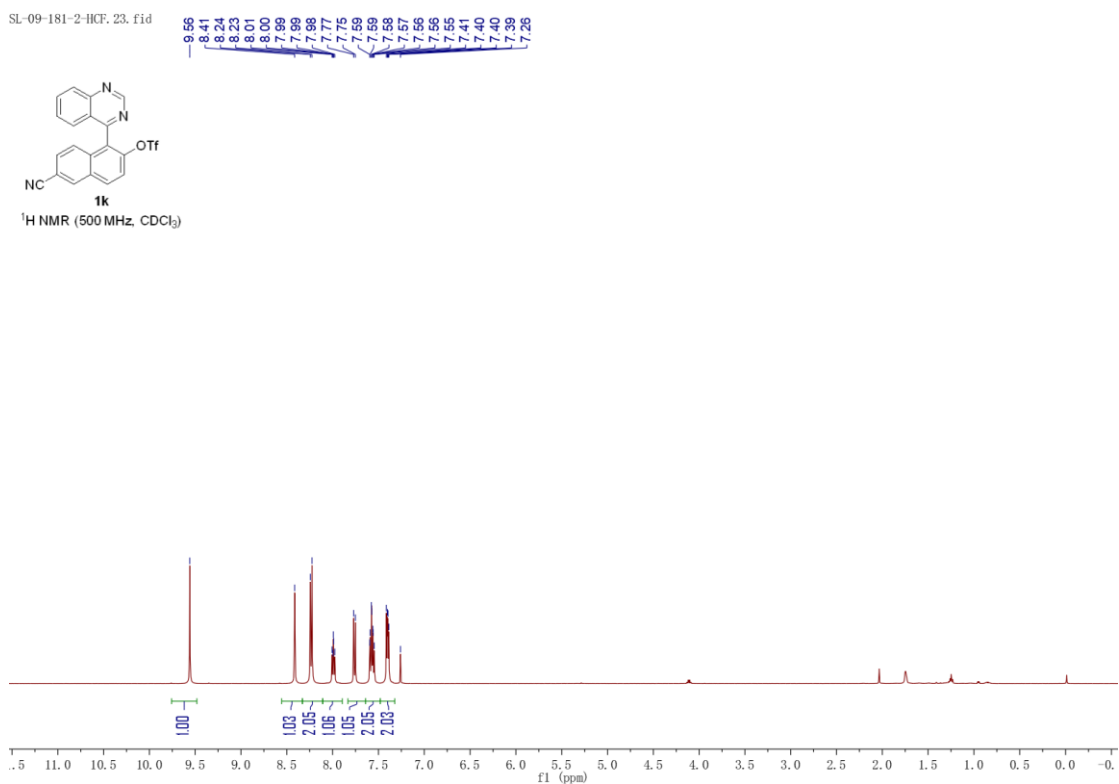



SL-09-181-2-HCF, 25. fid

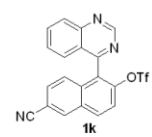

$^{13}\text{C}$  NMR (126 MHz,  $\text{CDCl}_3$ )

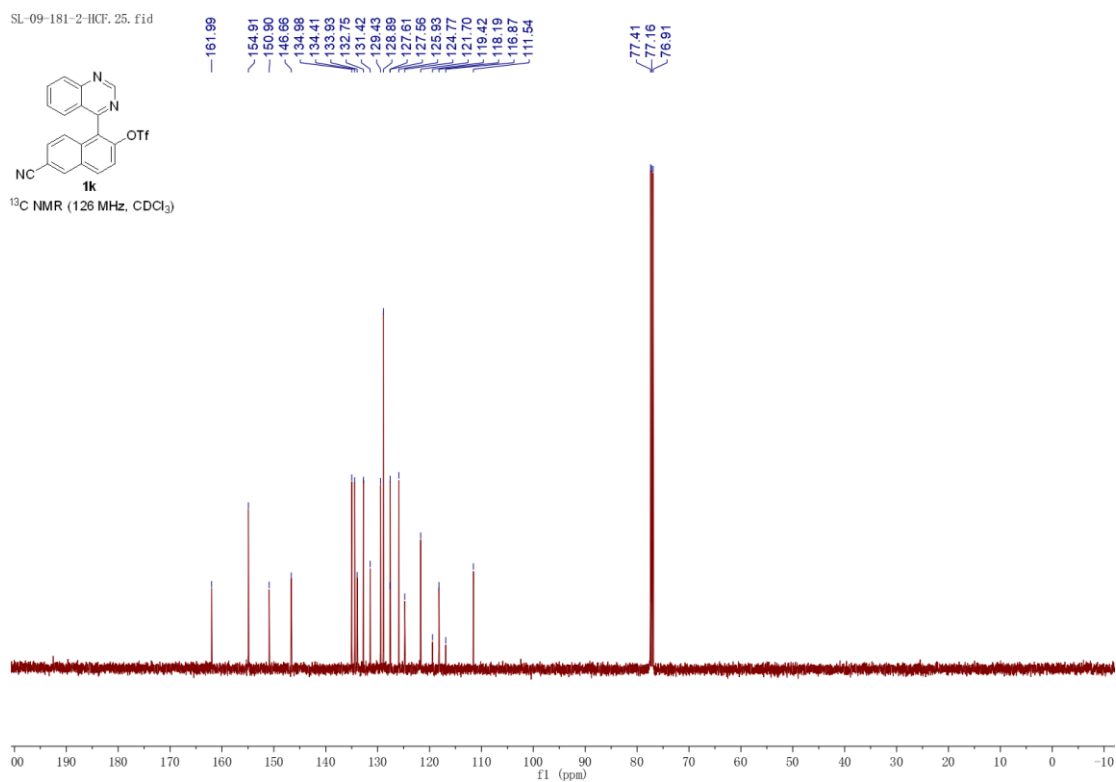

SL-09-181-2-HCF, 24. fid

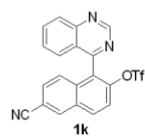

$^{19}\text{F}$  NMR (471 MHz,  $\text{CDCl}_3$ )

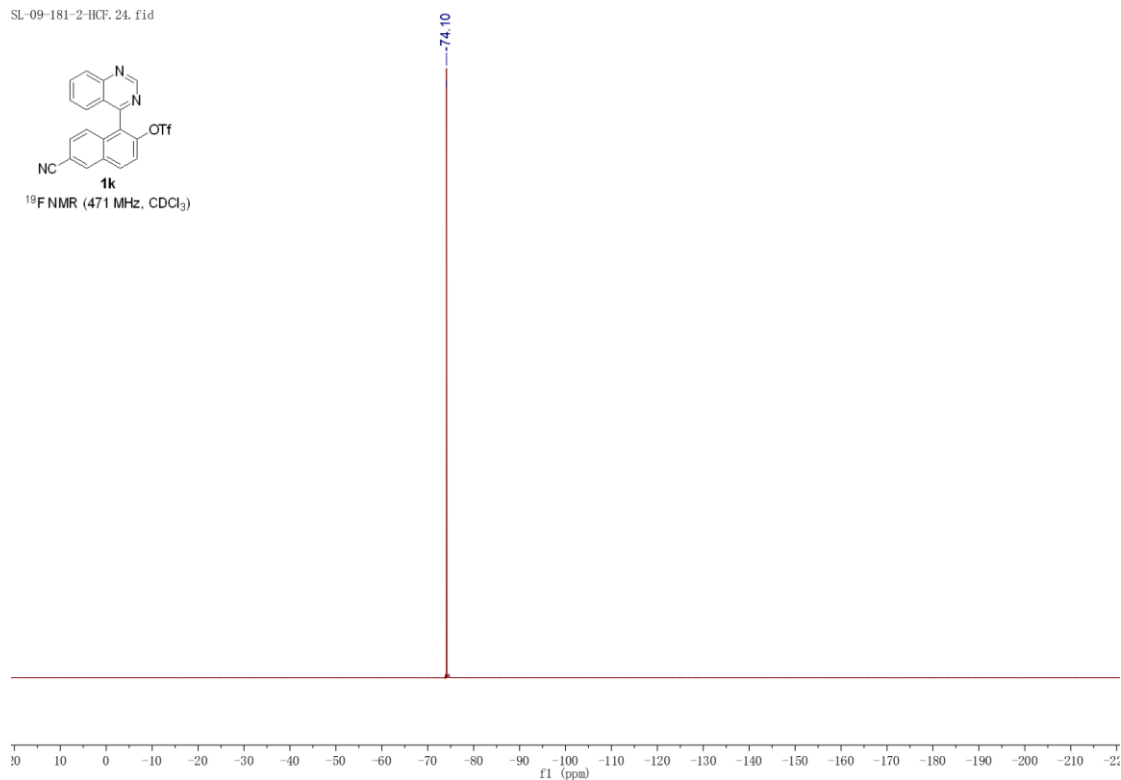

SL-09-188-2-HCF, 10. fid

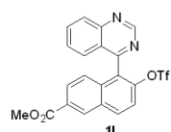

$^1\text{H}$  NMR (500 MHz,  $\text{CDCl}_3$ )

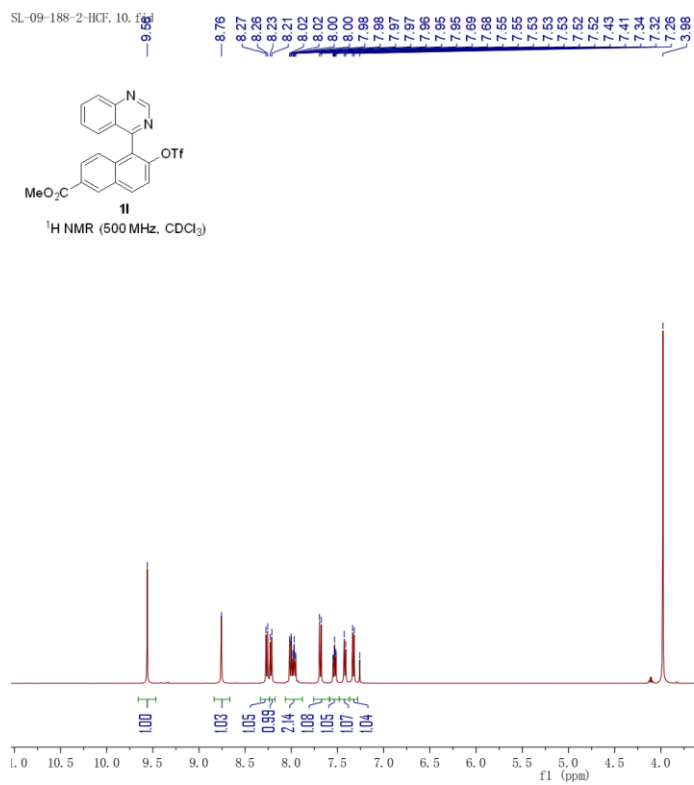

SL-09-188-2-C, 10. fid

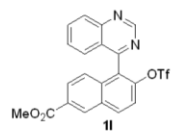

$^{13}\text{C}$  NMR (126 MHz,  $\text{CDCl}_3$ )

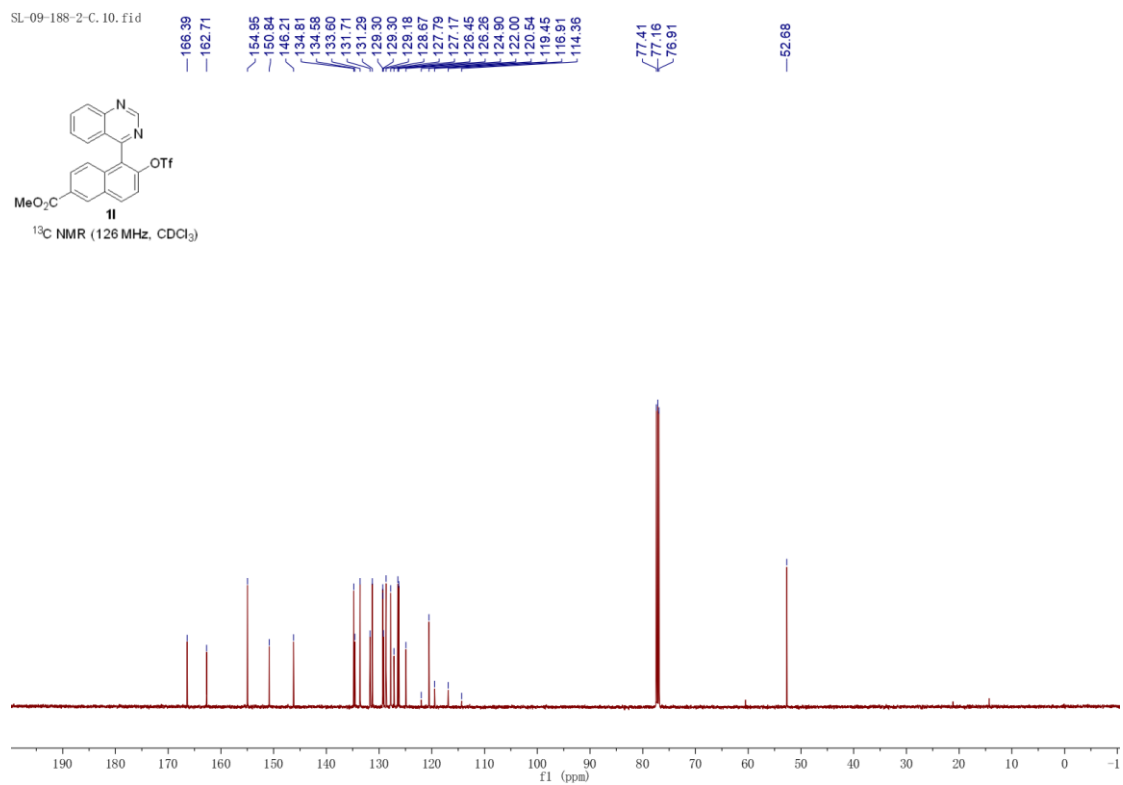

SL-09-188-2-HCF. 11. fid

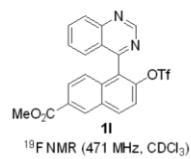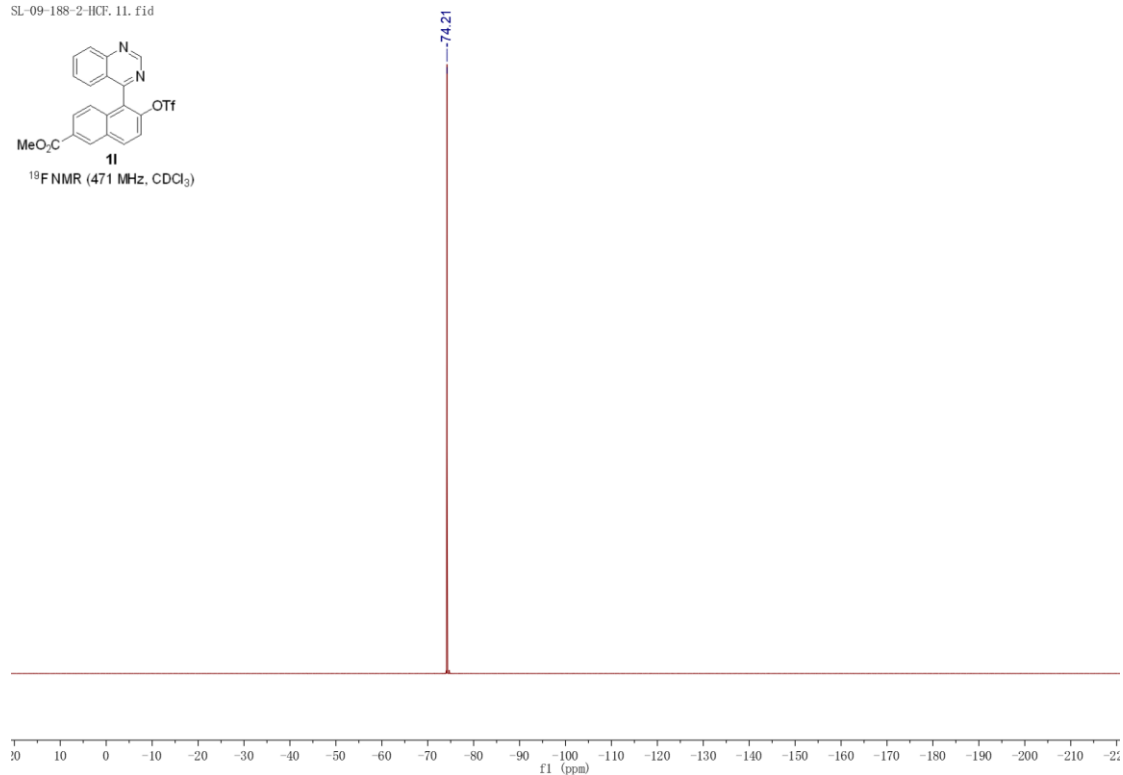

SL-09-188-1-HCF. 1m. fid

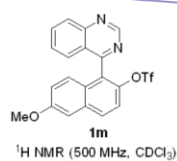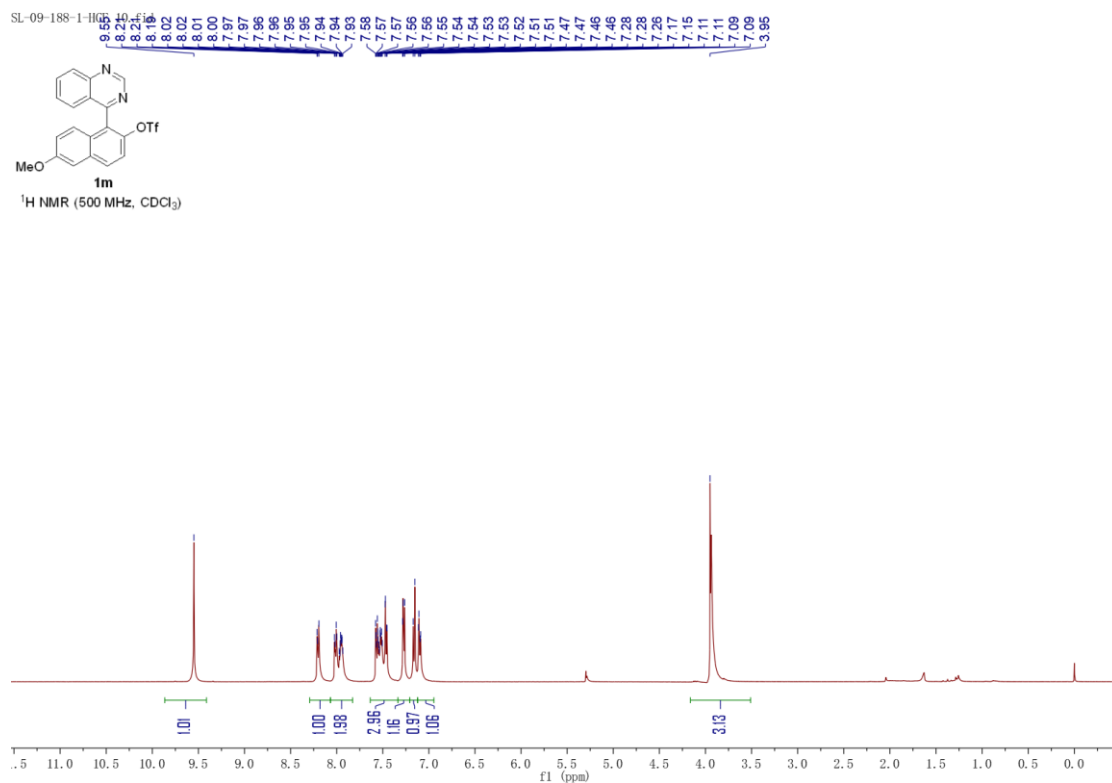

SL-09-188-1-HCF. 12. fid

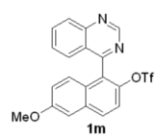

$^{13}\text{C}$  NMR (126 MHz,  $\text{CDCl}_3$ )

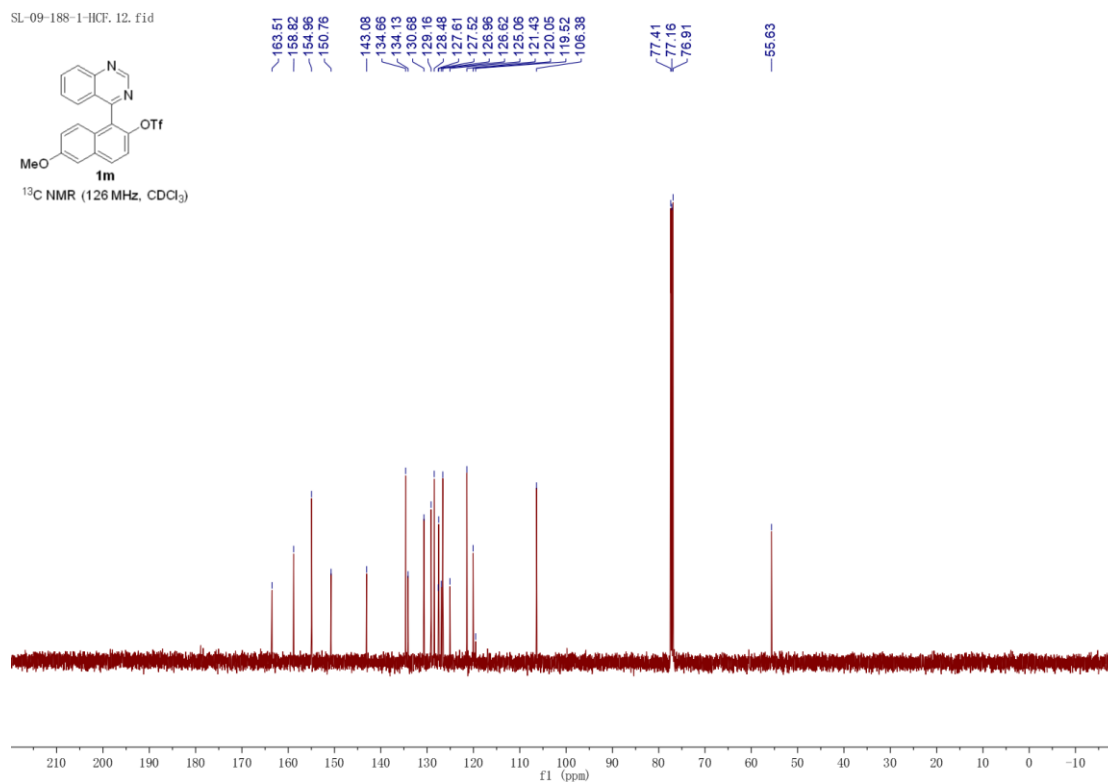

SL-09-188-1-HCF. 11. fid

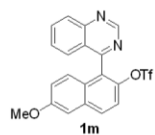

$^{19}\text{F}$  NMR (471 MHz,  $\text{CDCl}_3$ )

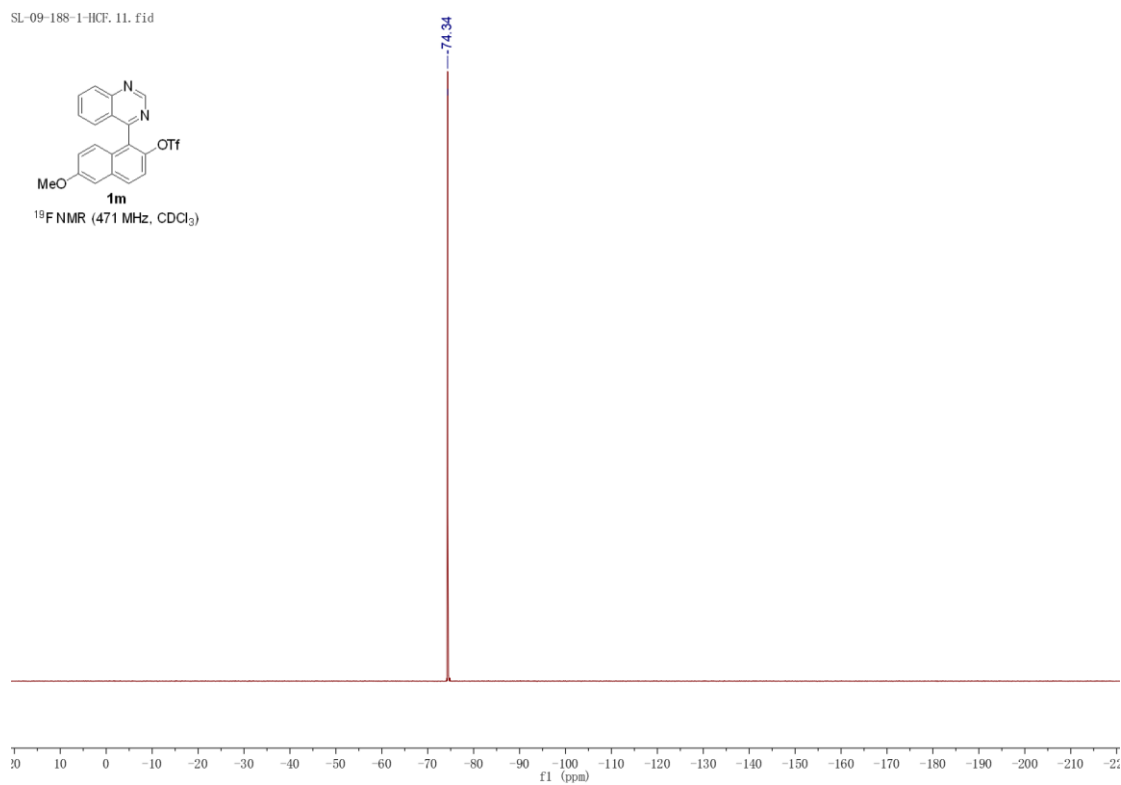

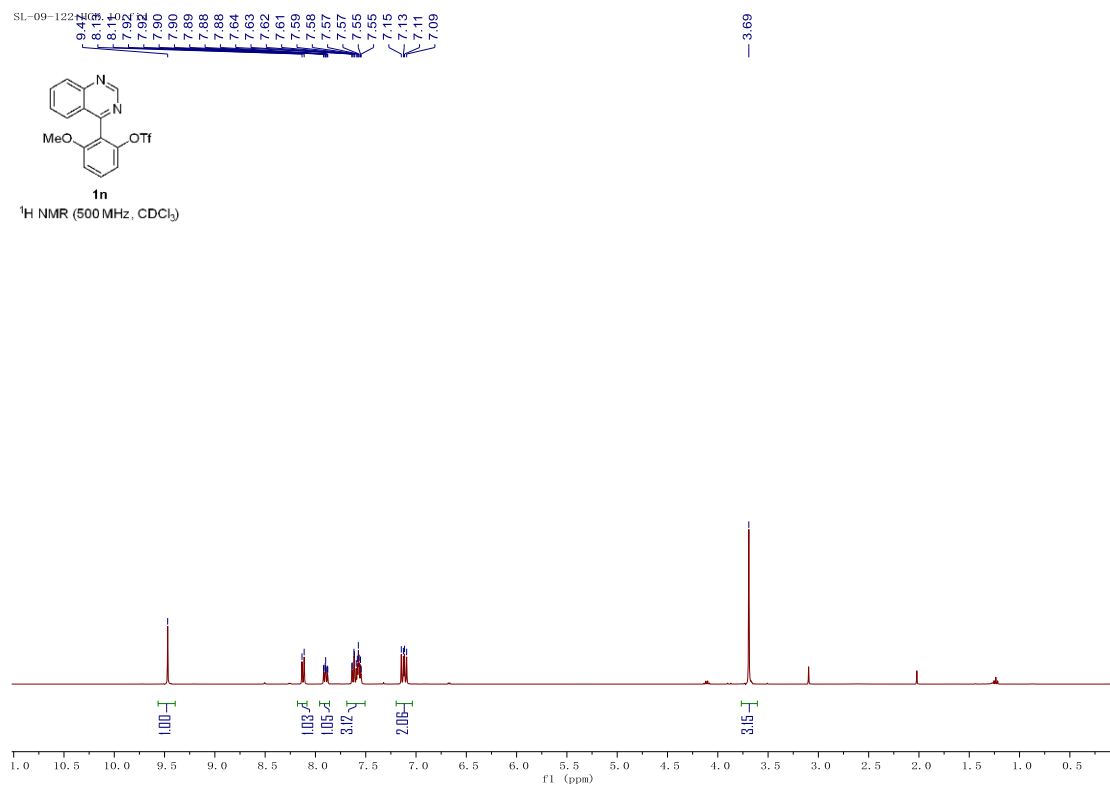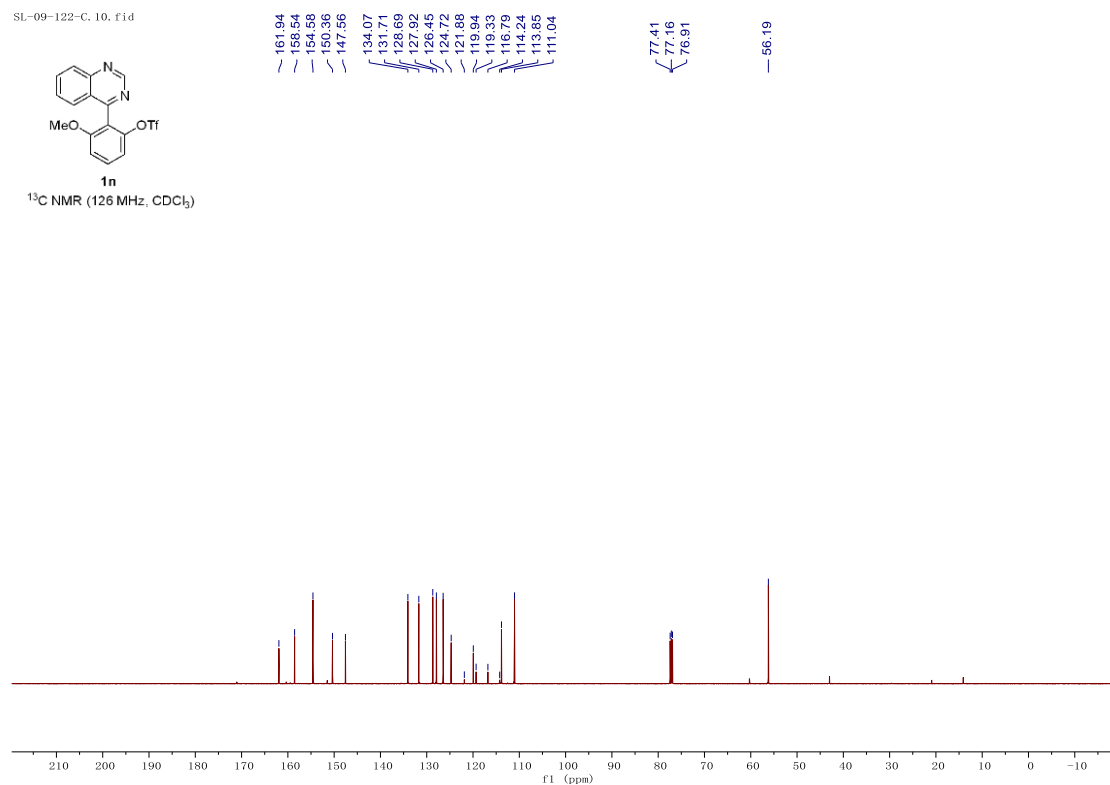

SL-09-122-F, 10, f1d

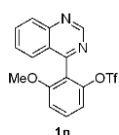

$^{19}\text{F}$  NMR (471 MHz,  $\text{CDCl}_3$ )

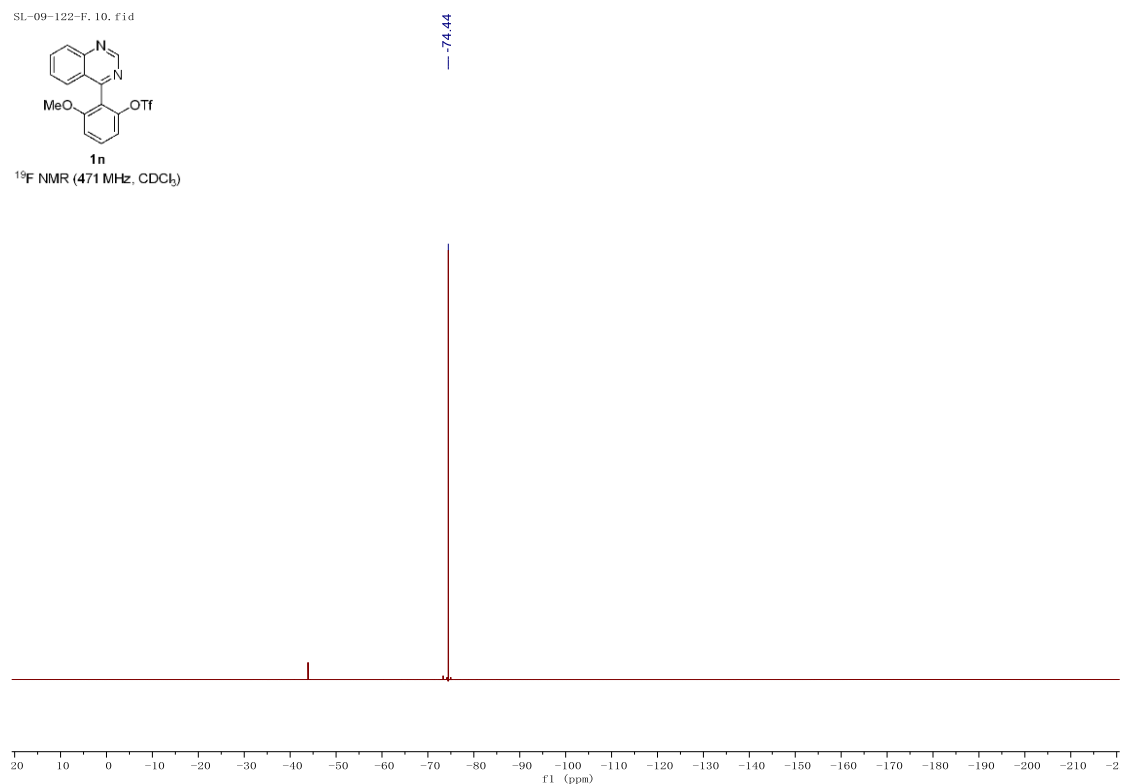

SL-09-139-HCF, 10, f1d

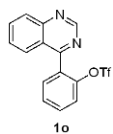

$^1\text{H}$  NMR (500 MHz,  $\text{CDCl}_3$ )

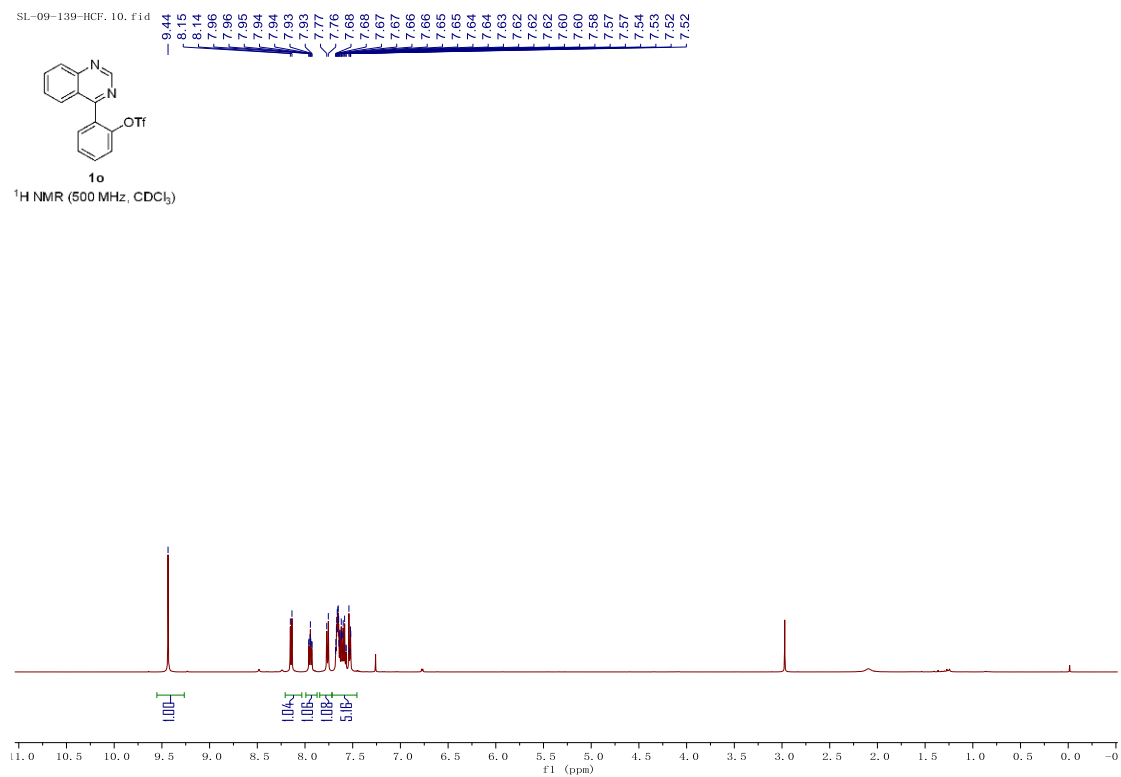

SL-09-139-HCF, 12. f1d

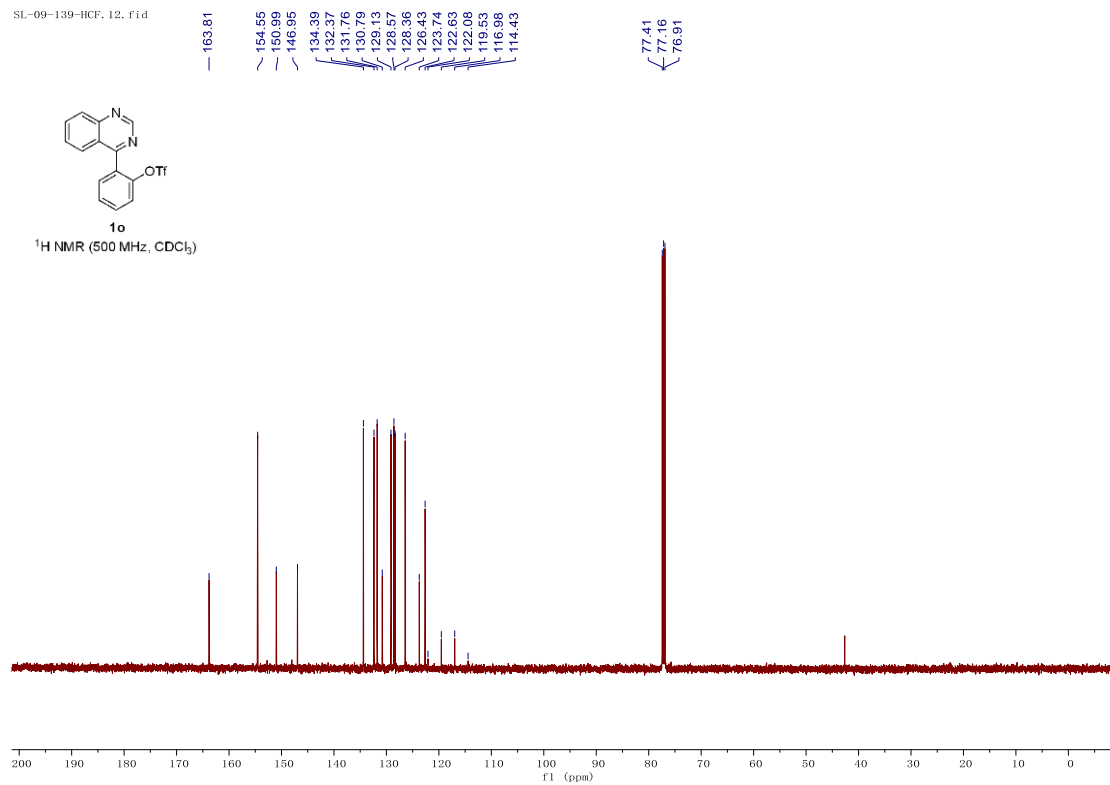

SL-09-139-HCF, 11. f1d

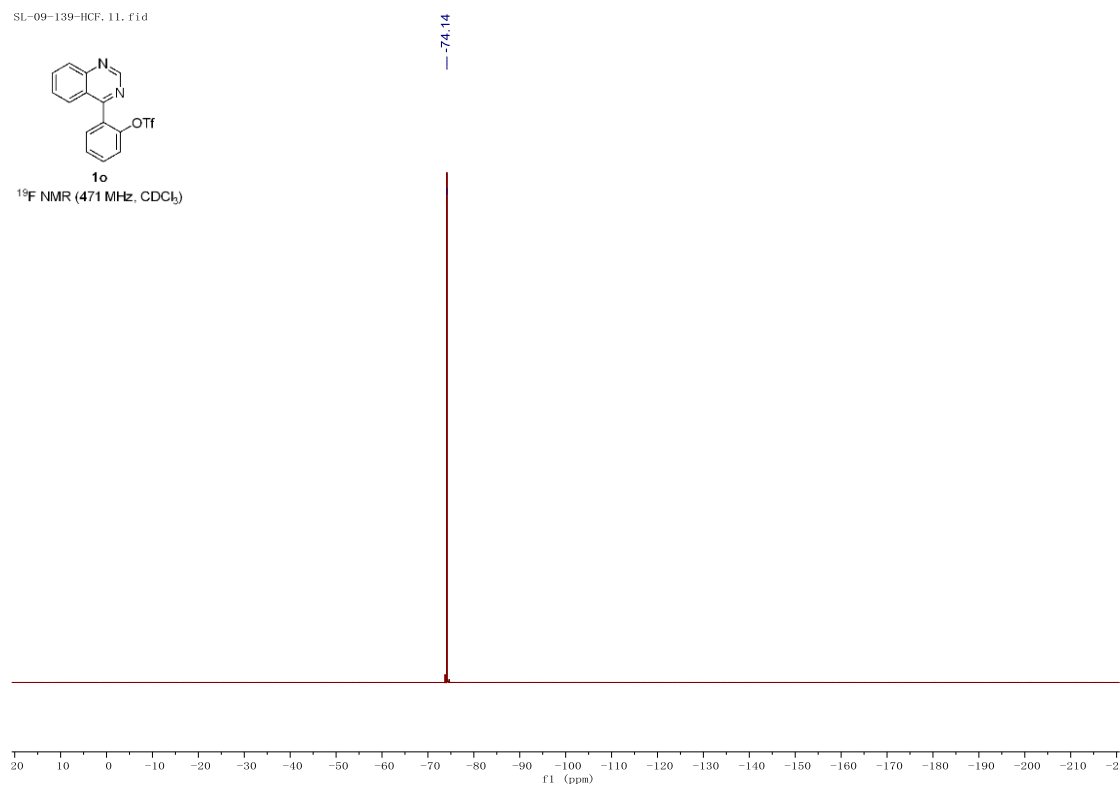

SL-09-165-1-HCF, 22, f1d

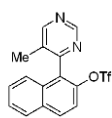

**1p**

$^1\text{H}$  NMR (500 MHz,  $\text{CDCl}_3$ )

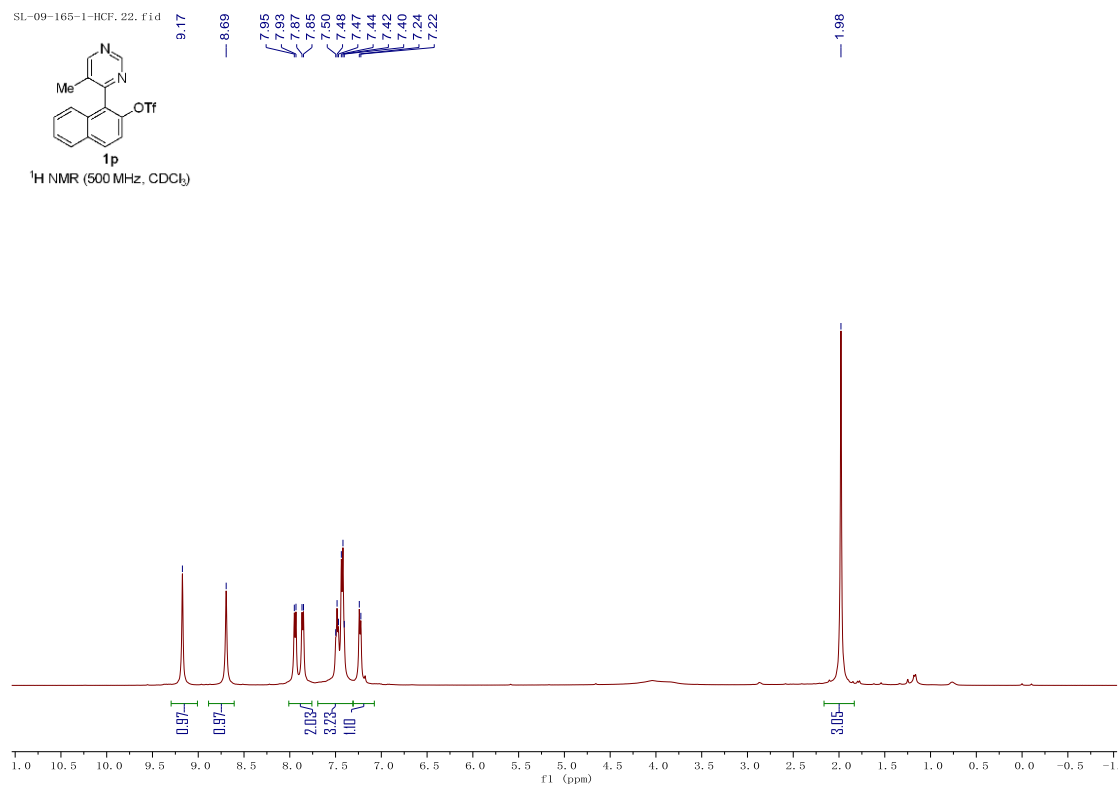

SL-09-165-1-HCF, 23, f1d

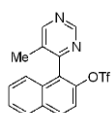

**1p**

$^{19}\text{F}$  NMR (471 MHz,  $\text{CDCl}_3$ )

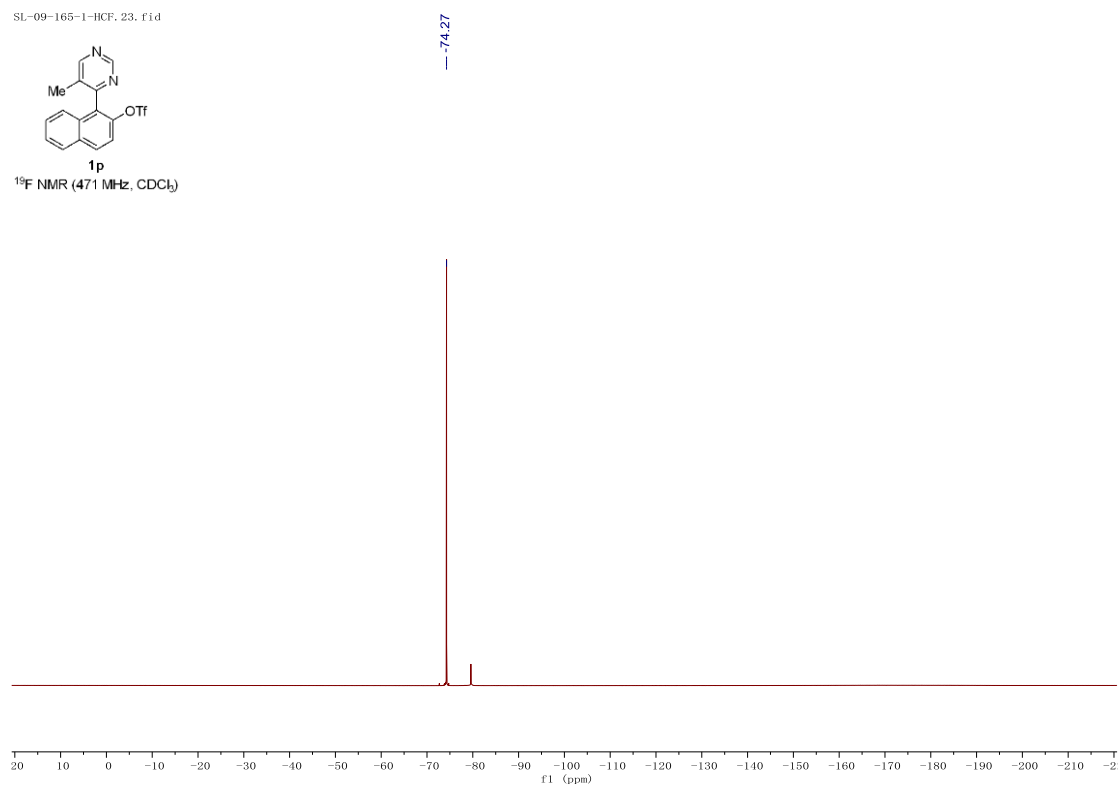



SL-09-165-1-C.20. f1d

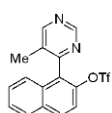

$^{13}\text{C}$  NMR (126 MHz,  $\text{CDCl}_3$ )

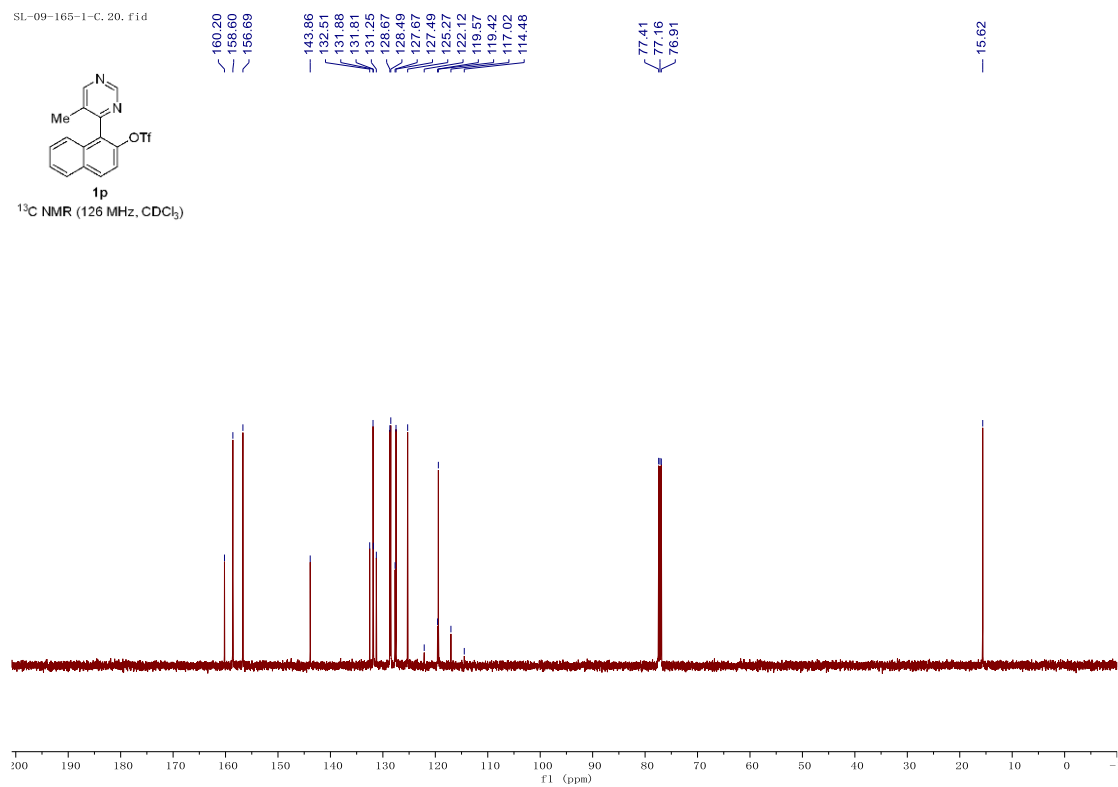

SL-09-178-1-P-HCF. 33. f27

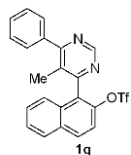

$^1\text{H}$  NMR (500 MHz,  $\text{CDCl}_3$ )

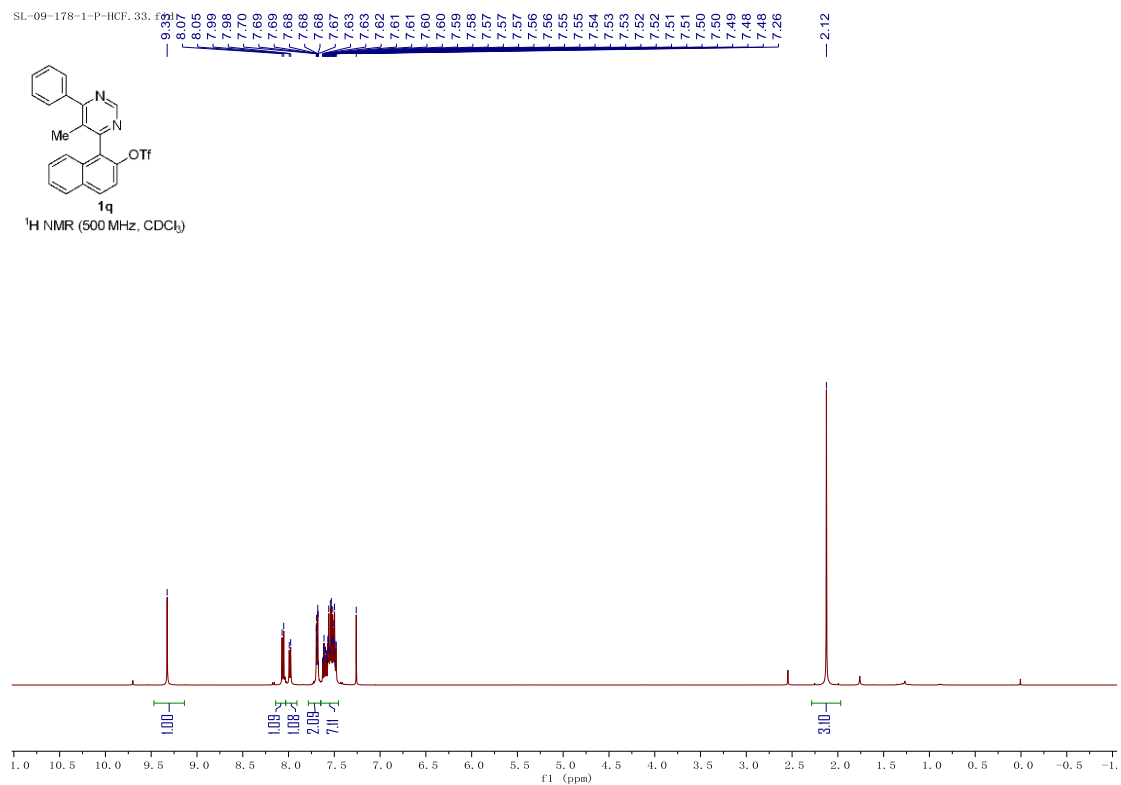

SL-09-178-1-P-HCF. 34. f1d

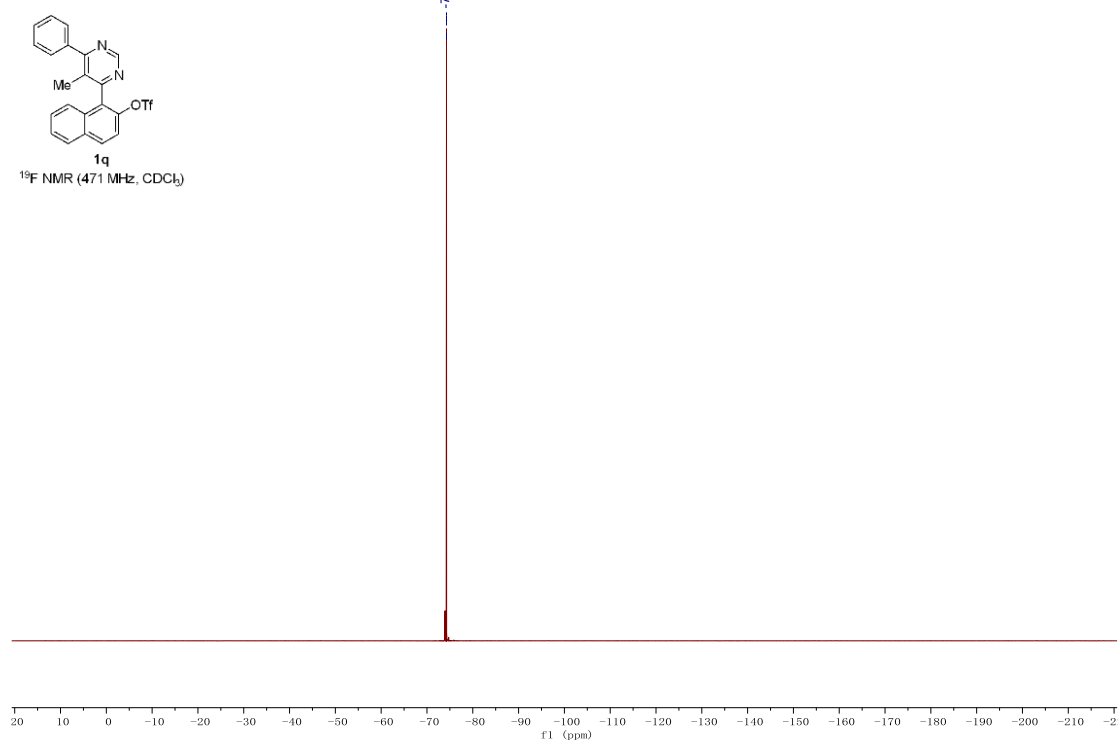

SL-09-178-1-P-HCF. 35. f1d

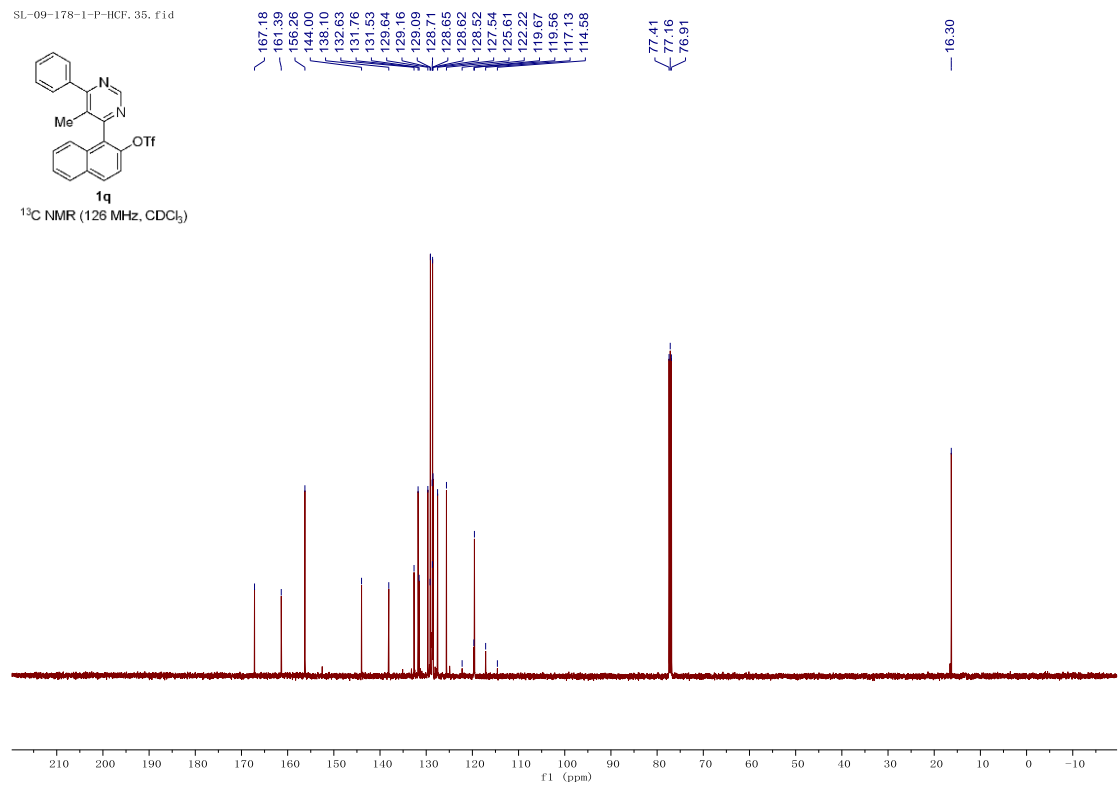

SL-09-178-2-HF, 0. f1d

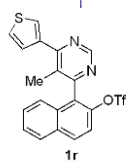

<sup>1</sup>H NMR (500 MHz, CDCl<sub>3</sub>)

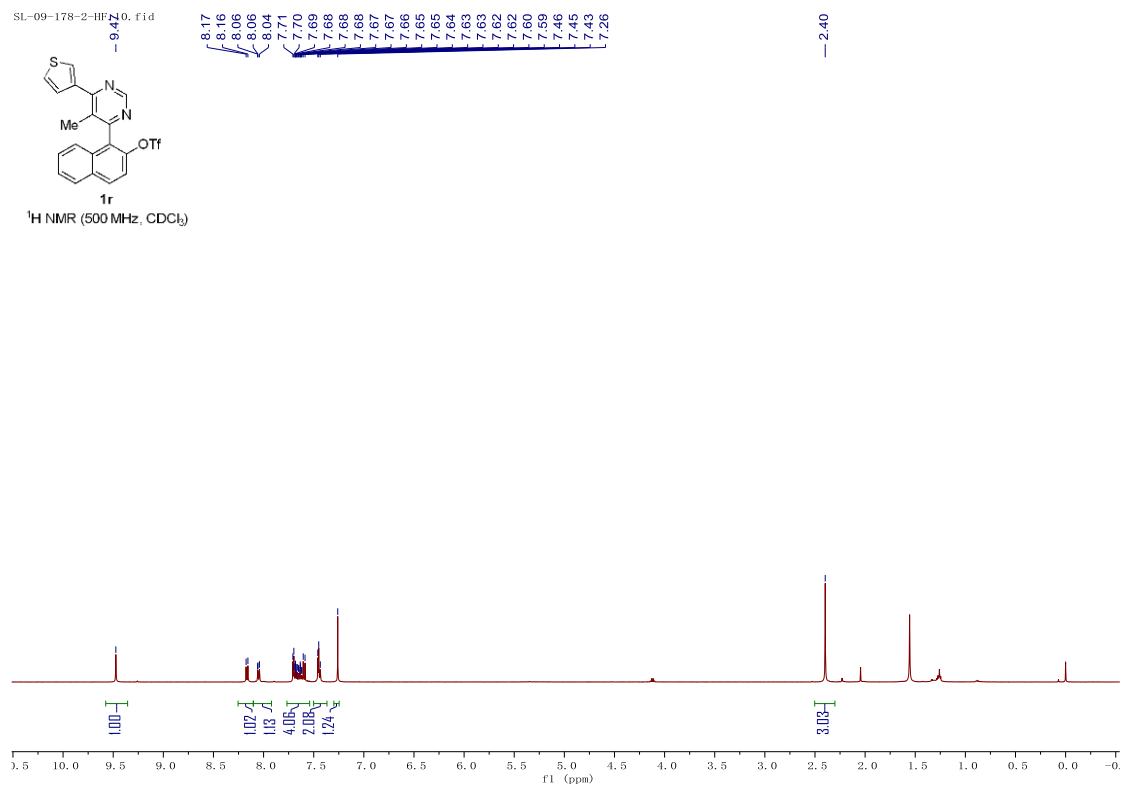

SL-09-178-2-HF, 11. f1d

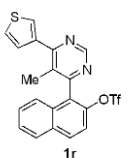

<sup>19</sup>F NMR (471 MHz, CDCl<sub>3</sub>)

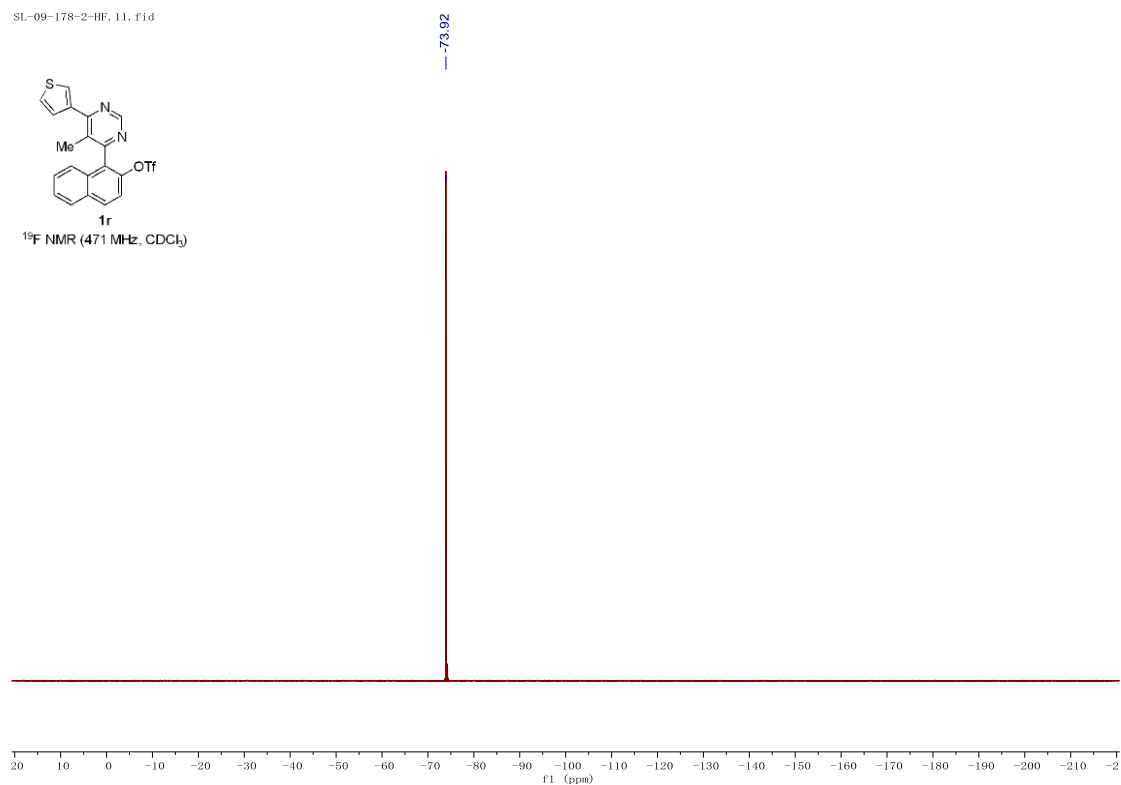

SL-09-178-2-HF, 12, fid

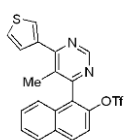

**1r**  
 $^{13}\text{C}$  NMR (126 MHz,  $\text{CDCl}_3$ )

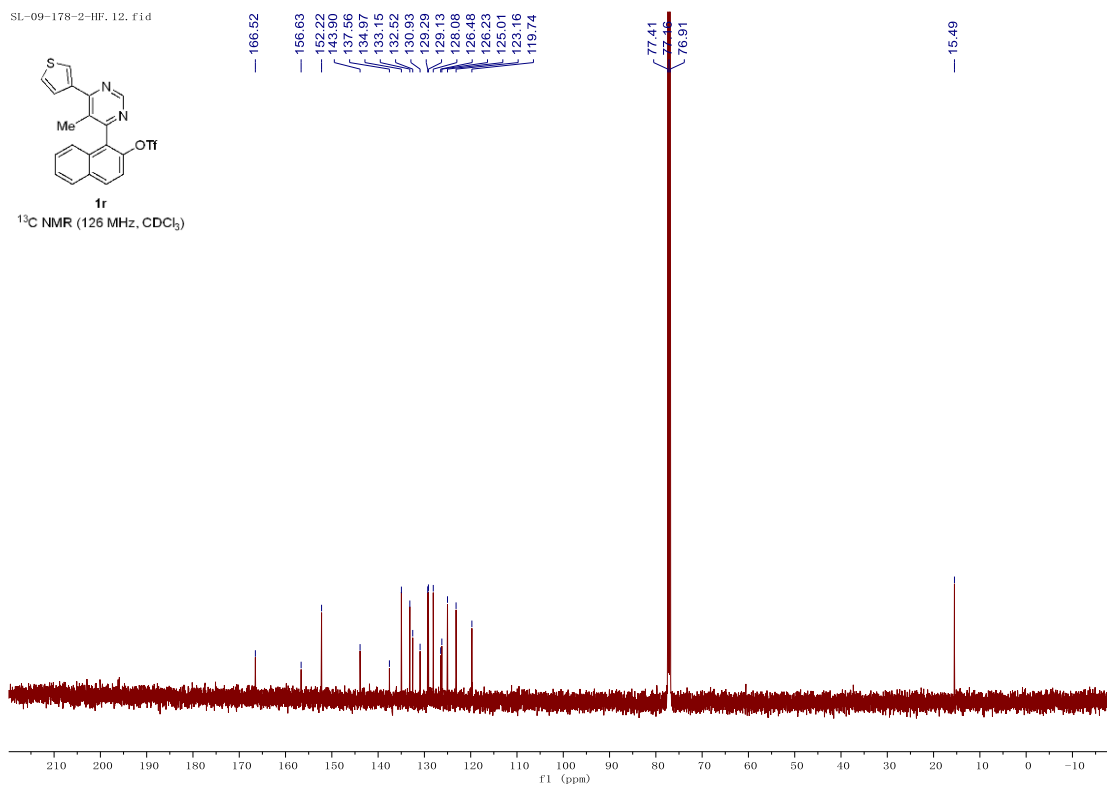

SL-09-178-2-HF, 12, fid

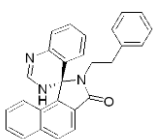

**4aa**  
 $^1\text{H}$  NMR (500 MHz,  $\text{CDCl}_3$ )

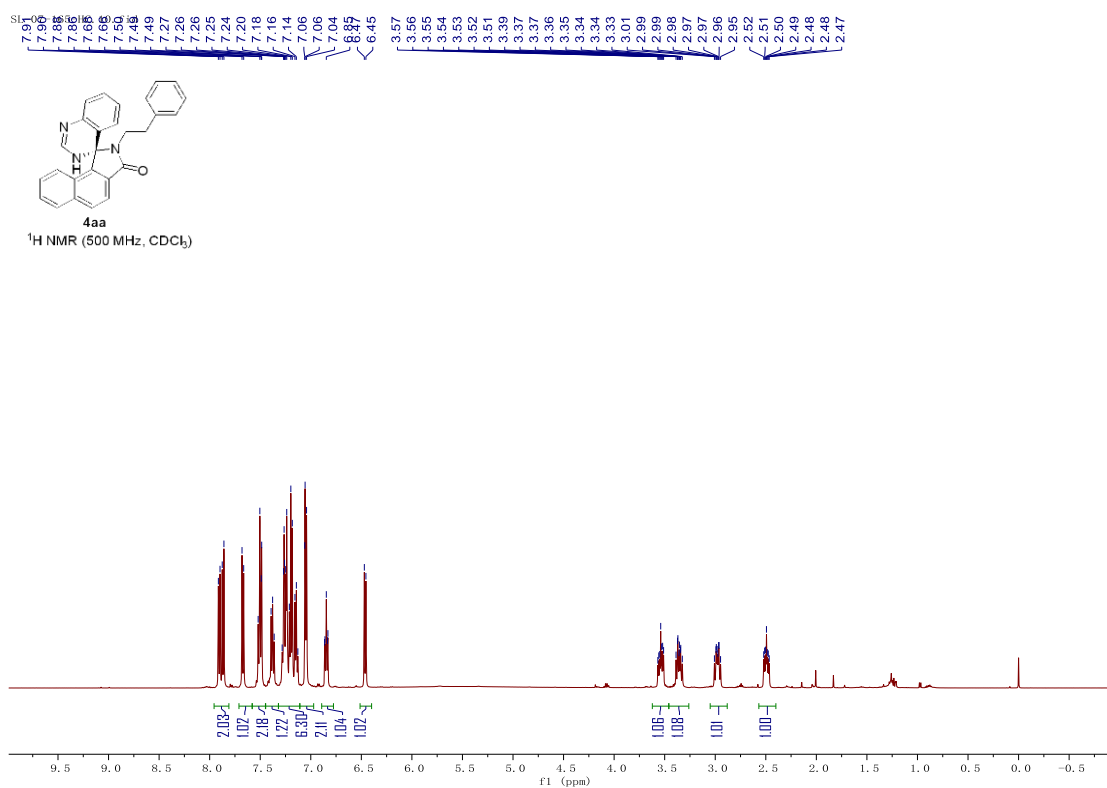

SL-07-165, 10, fid

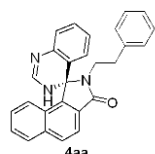

$^{13}\text{C}$  NMR (126 MHz,  $\text{CDCl}_3$ )

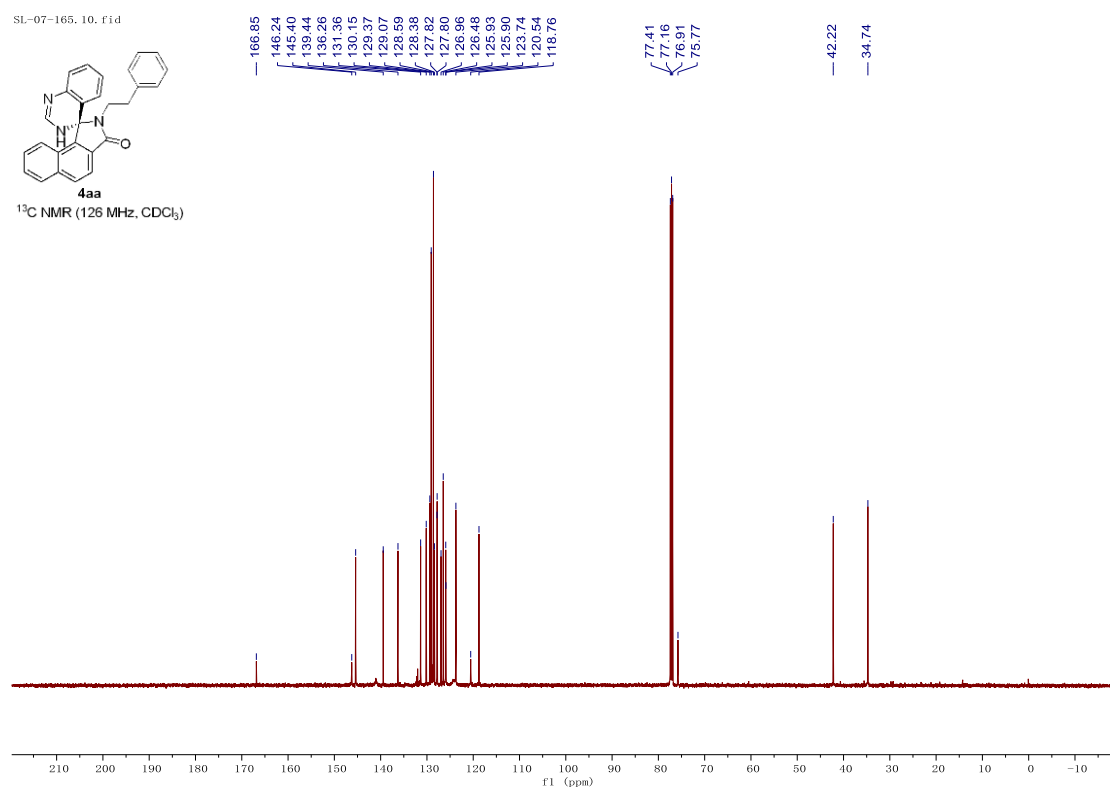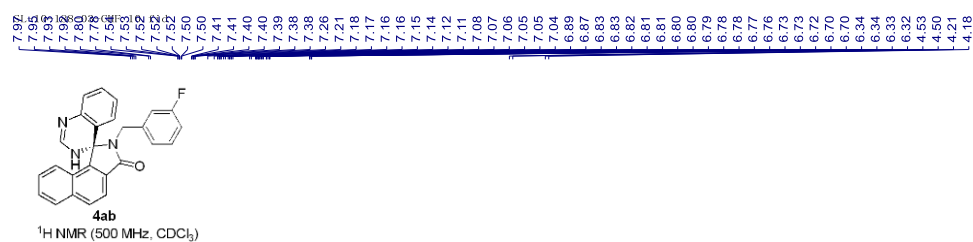

$^1\text{H}$  NMR (500 MHz,  $\text{CDCl}_3$ )

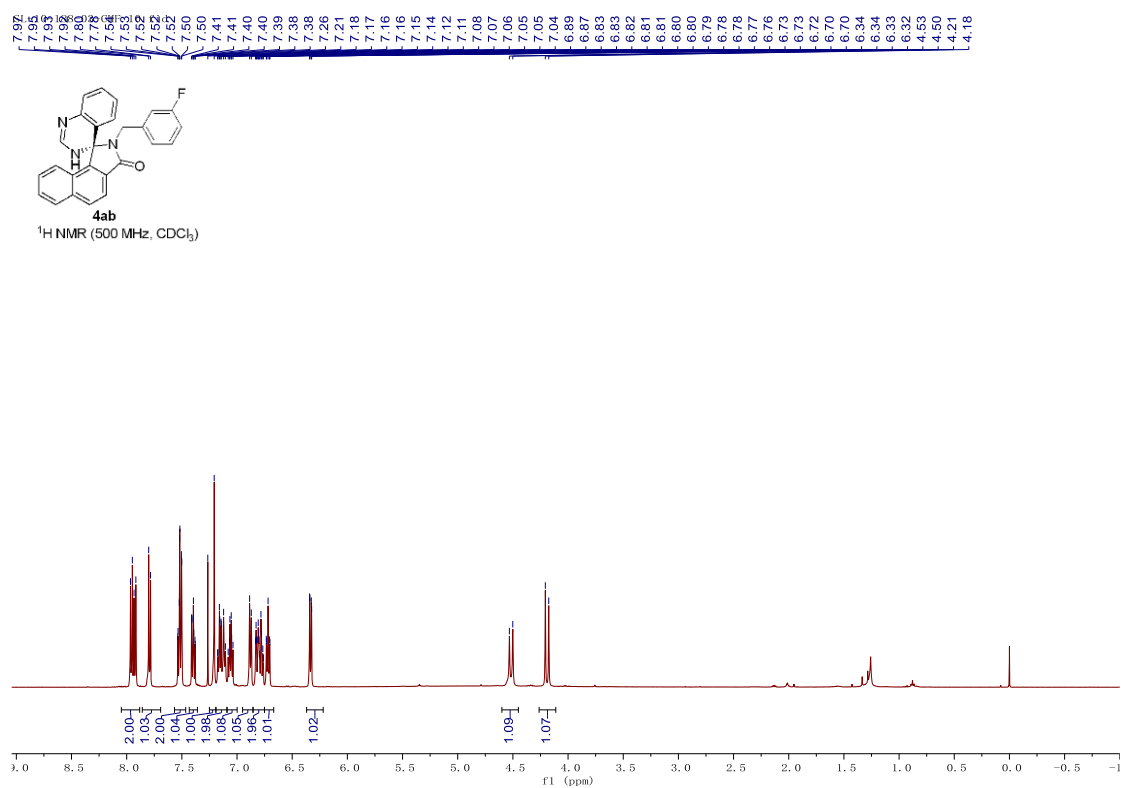

SL-10-188-03-CHF, 11, f1d

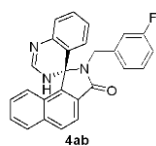

$^{19}\text{F}$  NMR (471 MHz,  $\text{CDCl}_3$ )

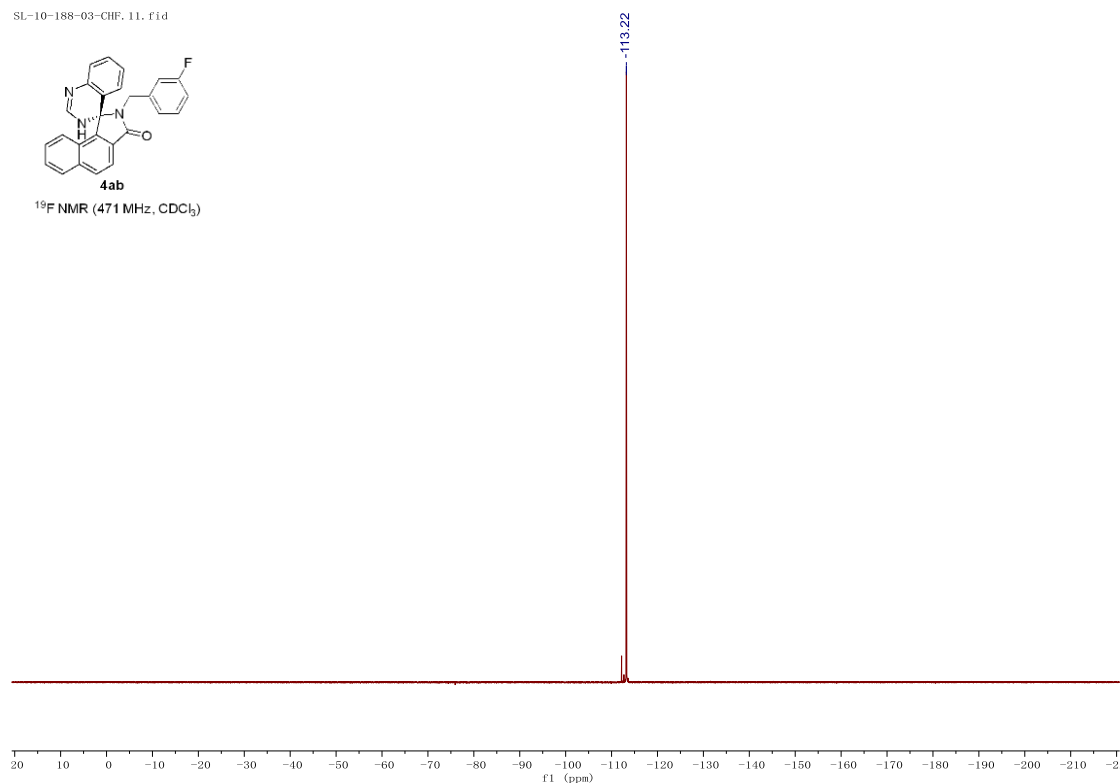

SL-10-188-03-CHF, 12, f1d

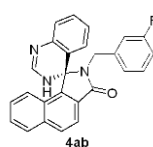

$^{13}\text{C}$  NMR (126 MHz,  $\text{CDCl}_3$ )

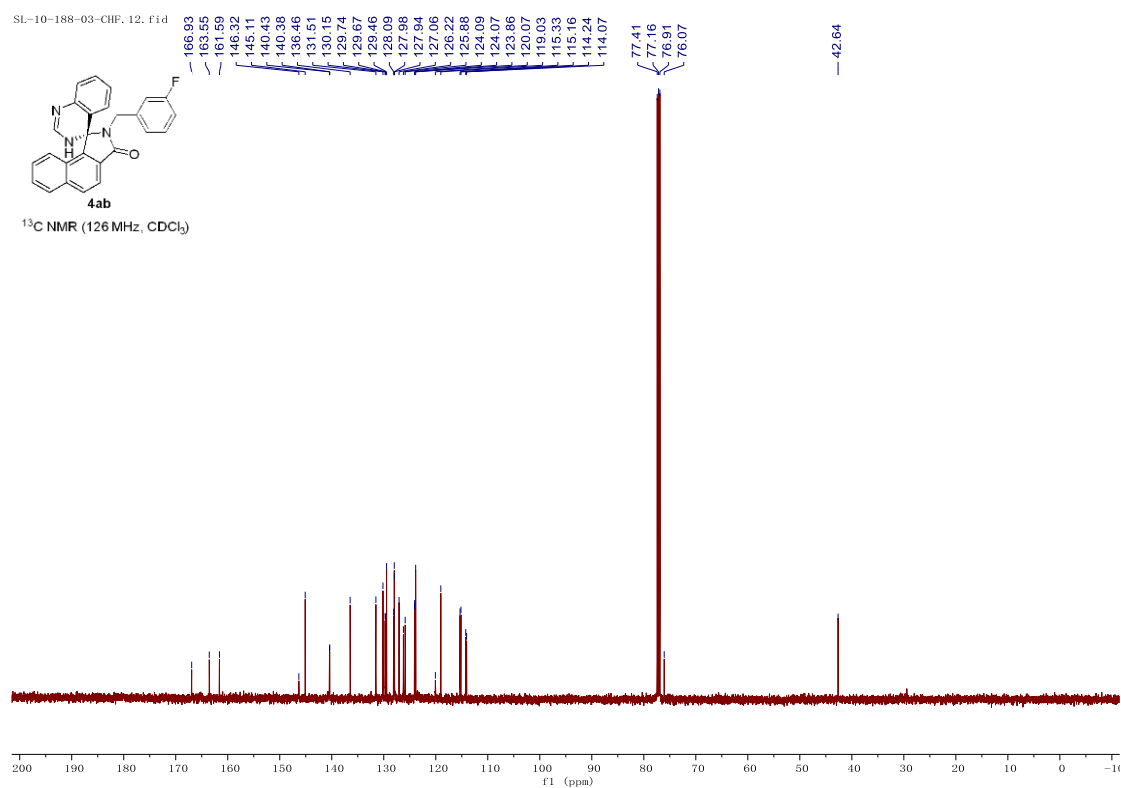

SL-09-138-1-HC-1, 32, f1

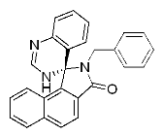

<sup>1</sup>H NMR (500 MHz, CDCl<sub>3</sub>)

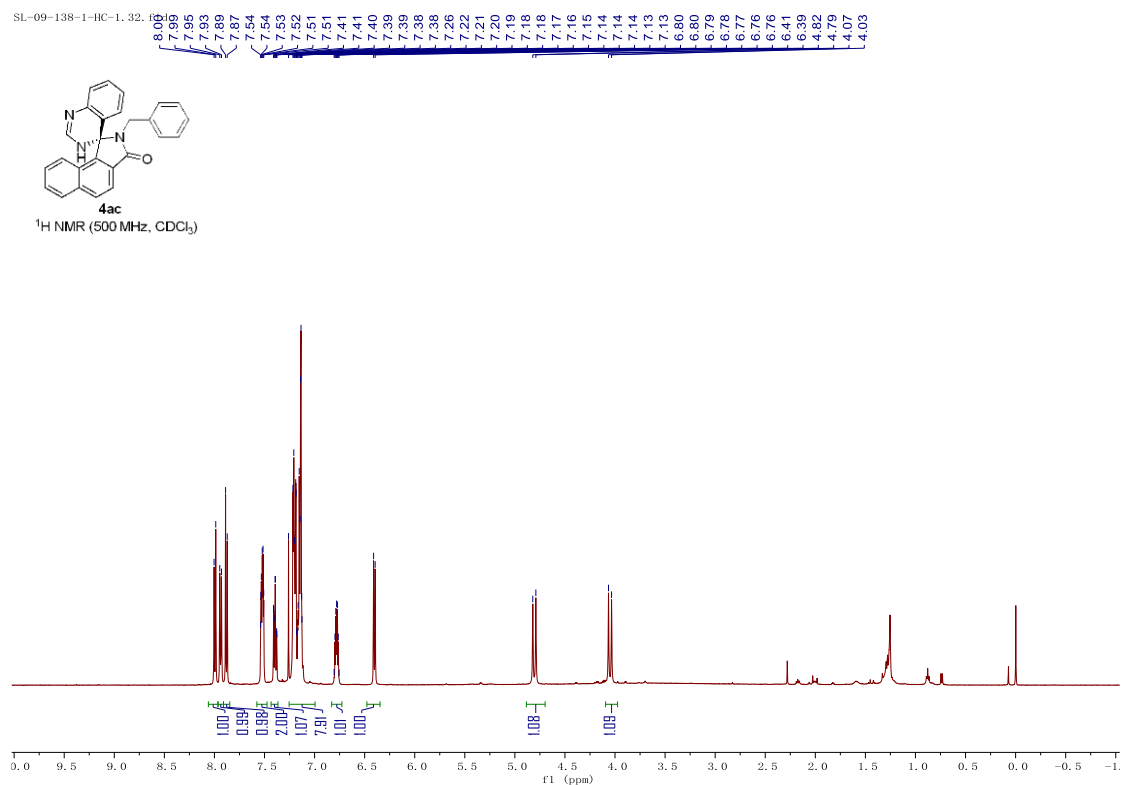

SL-09-138-1-HC-1, 33, f1d

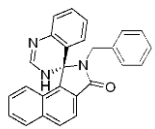

<sup>13</sup>C NMR (126 MHz, CDCl<sub>3</sub>)

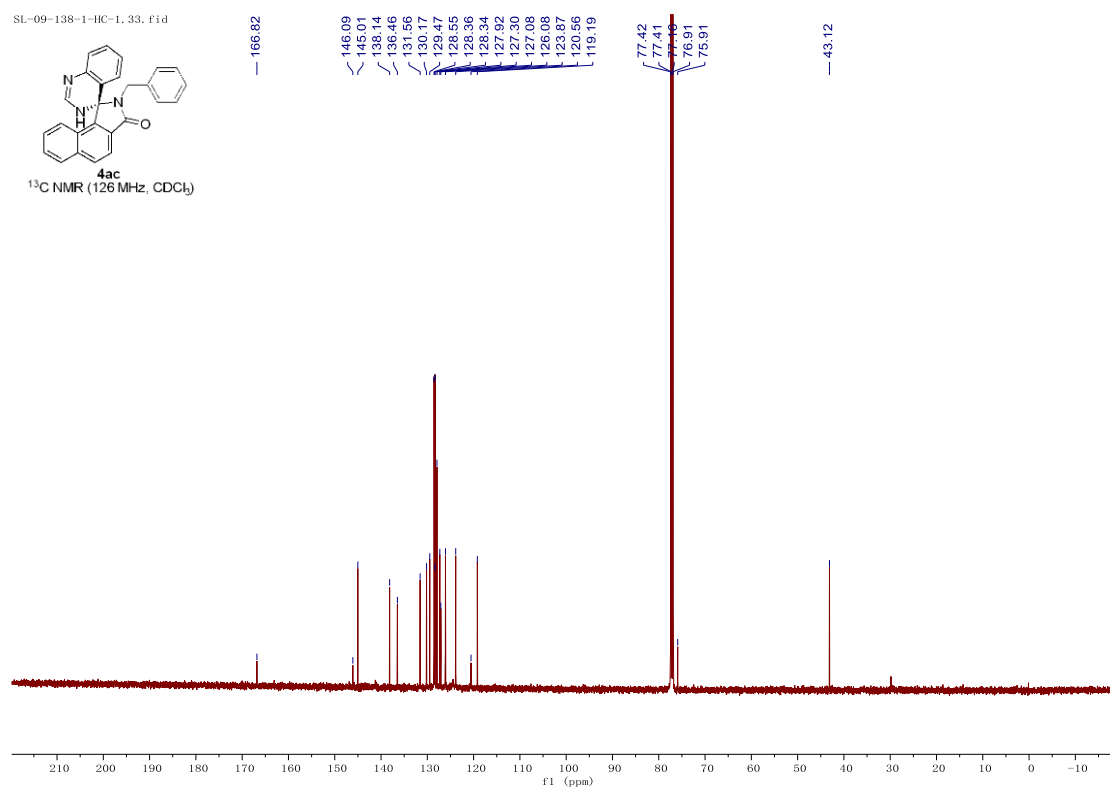

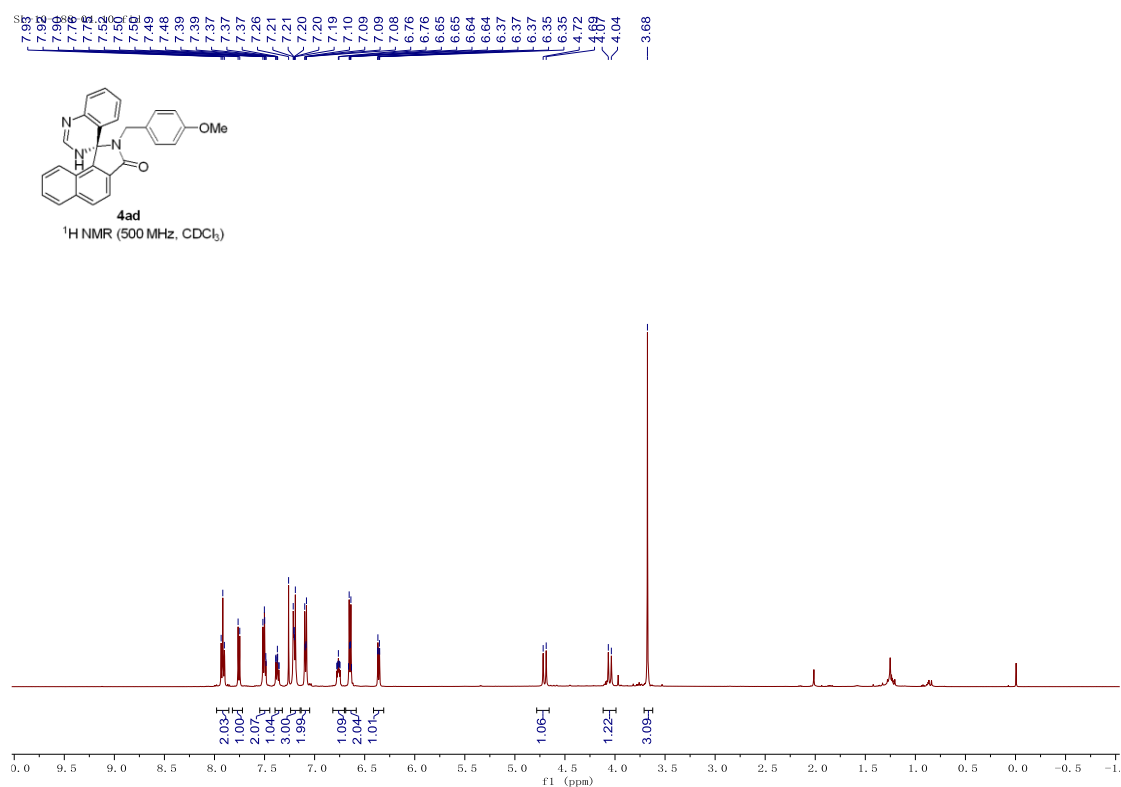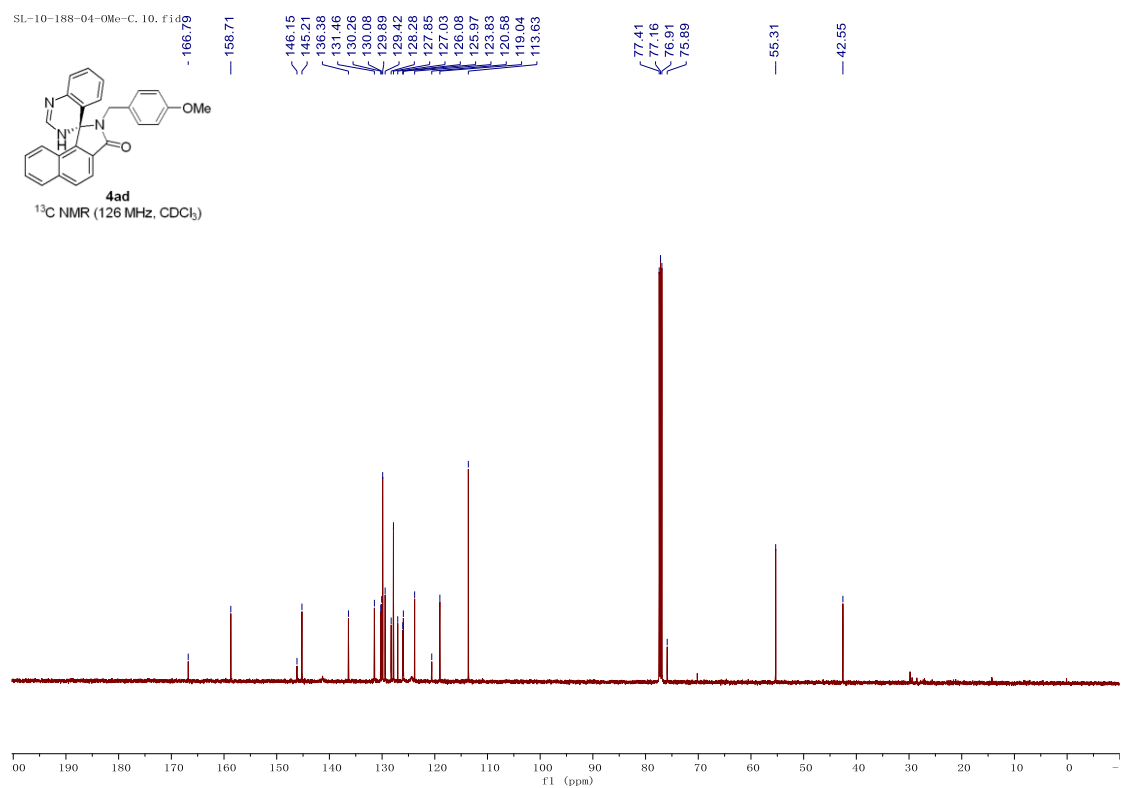



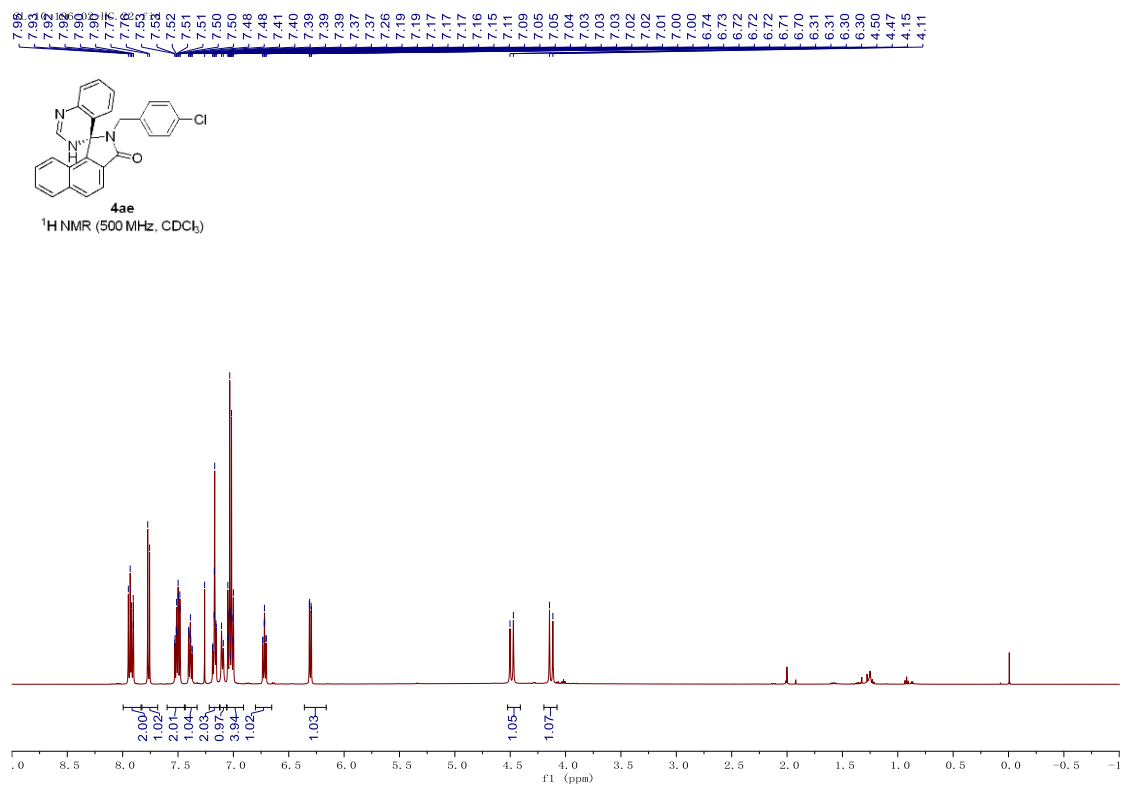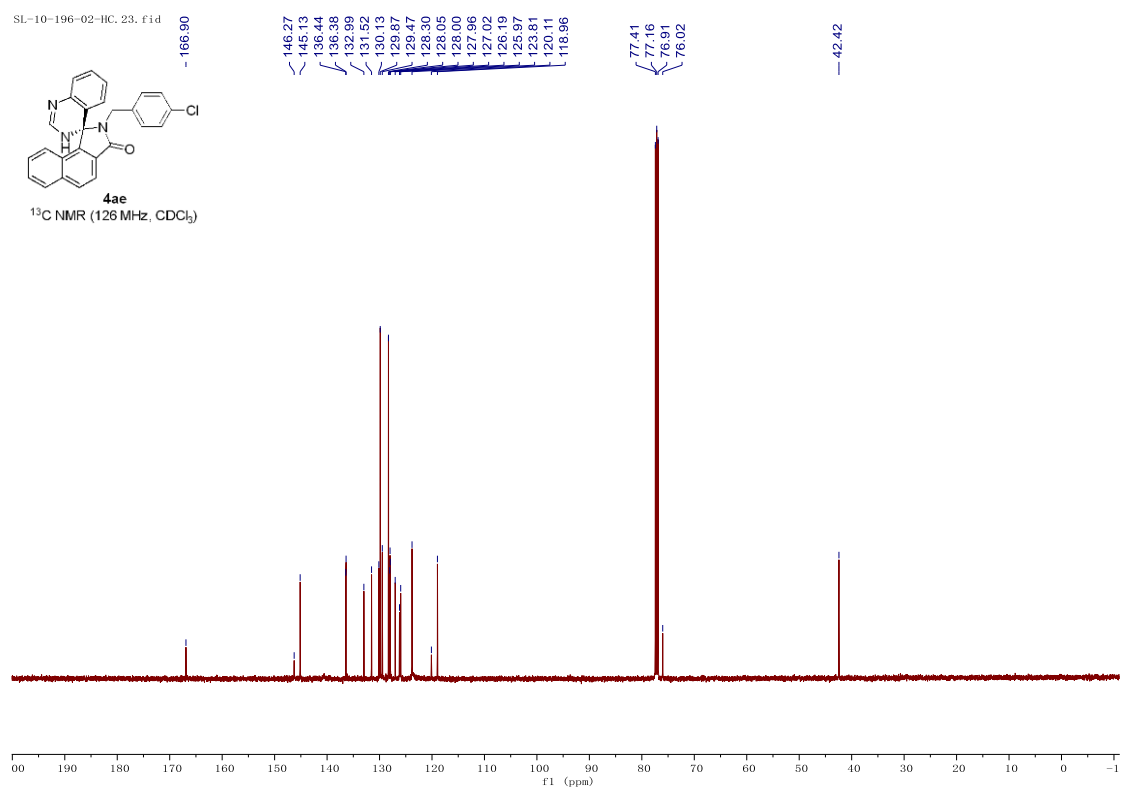

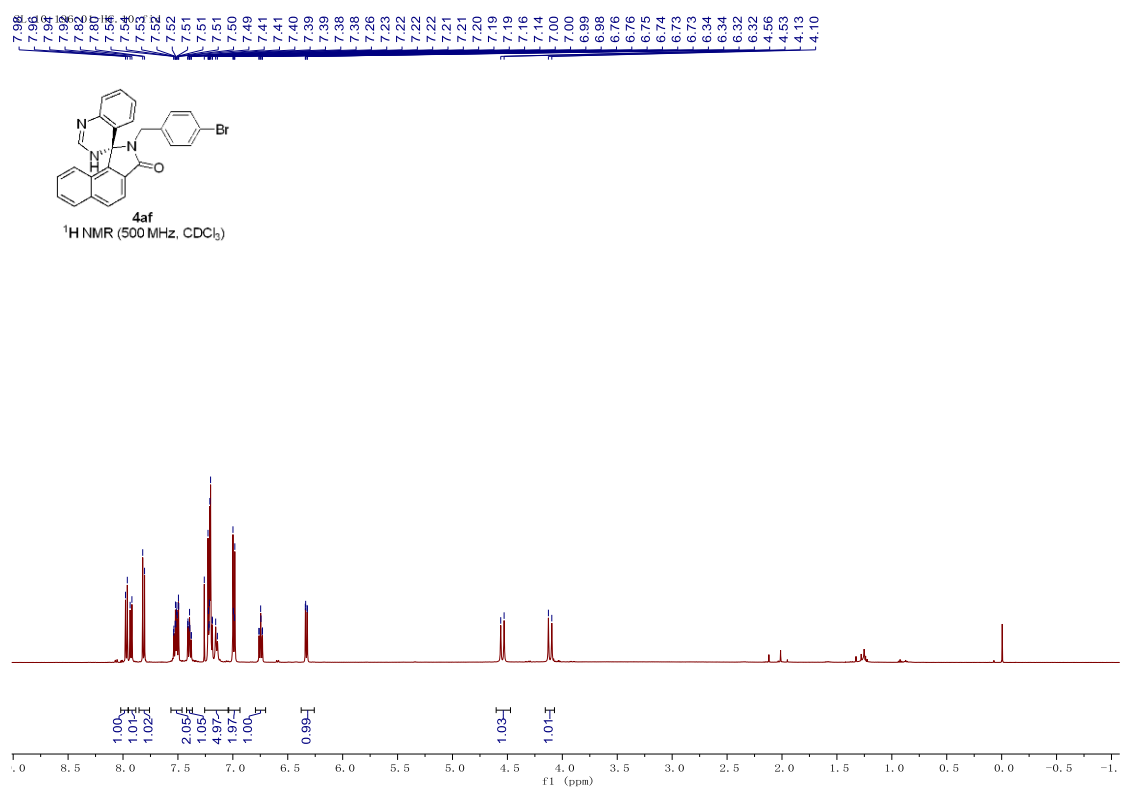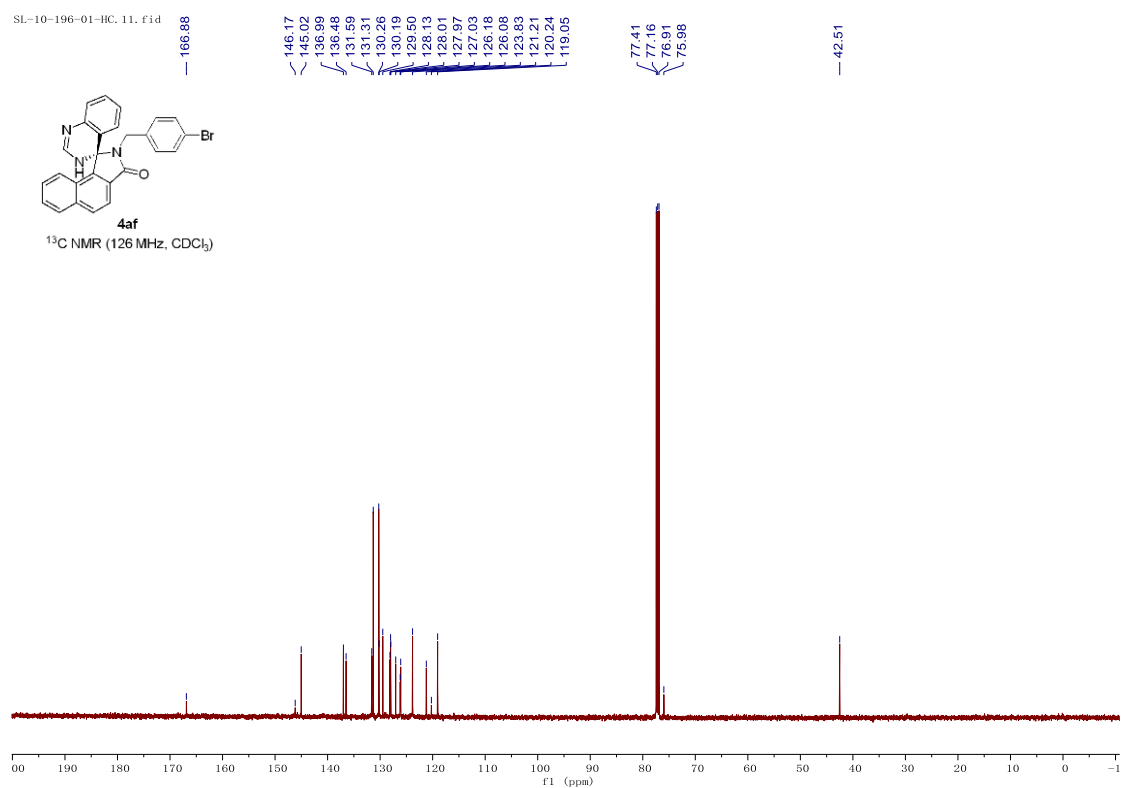

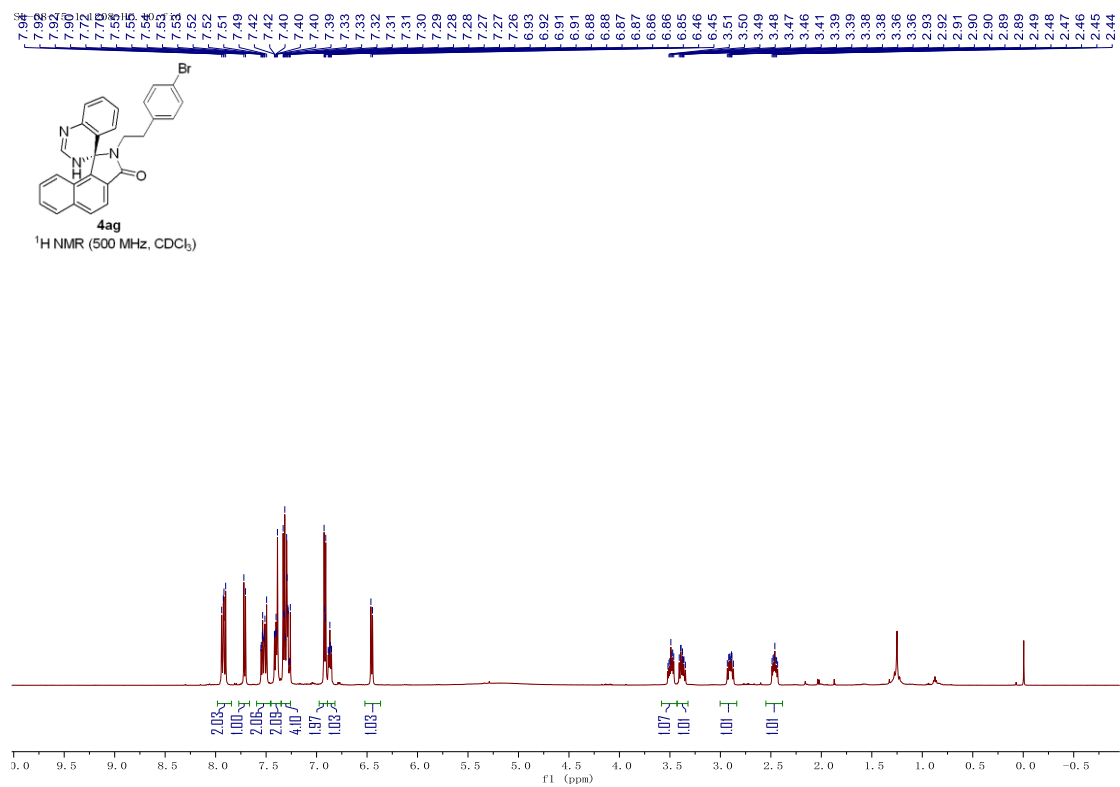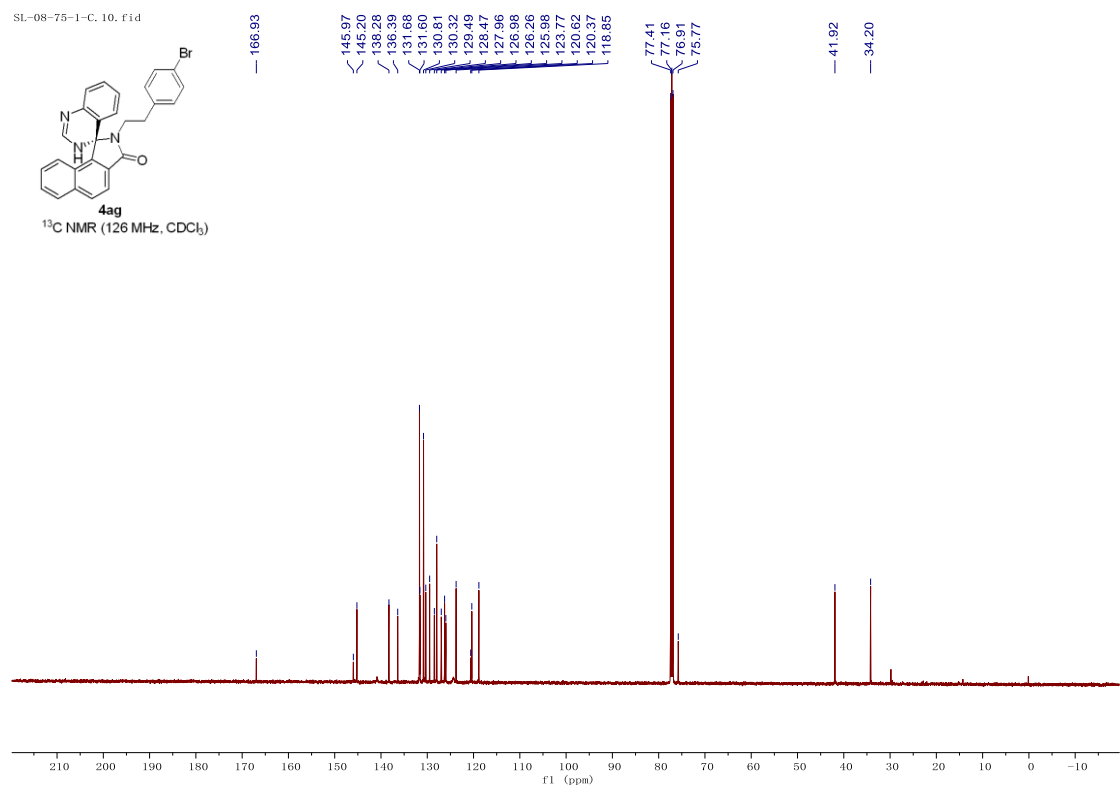

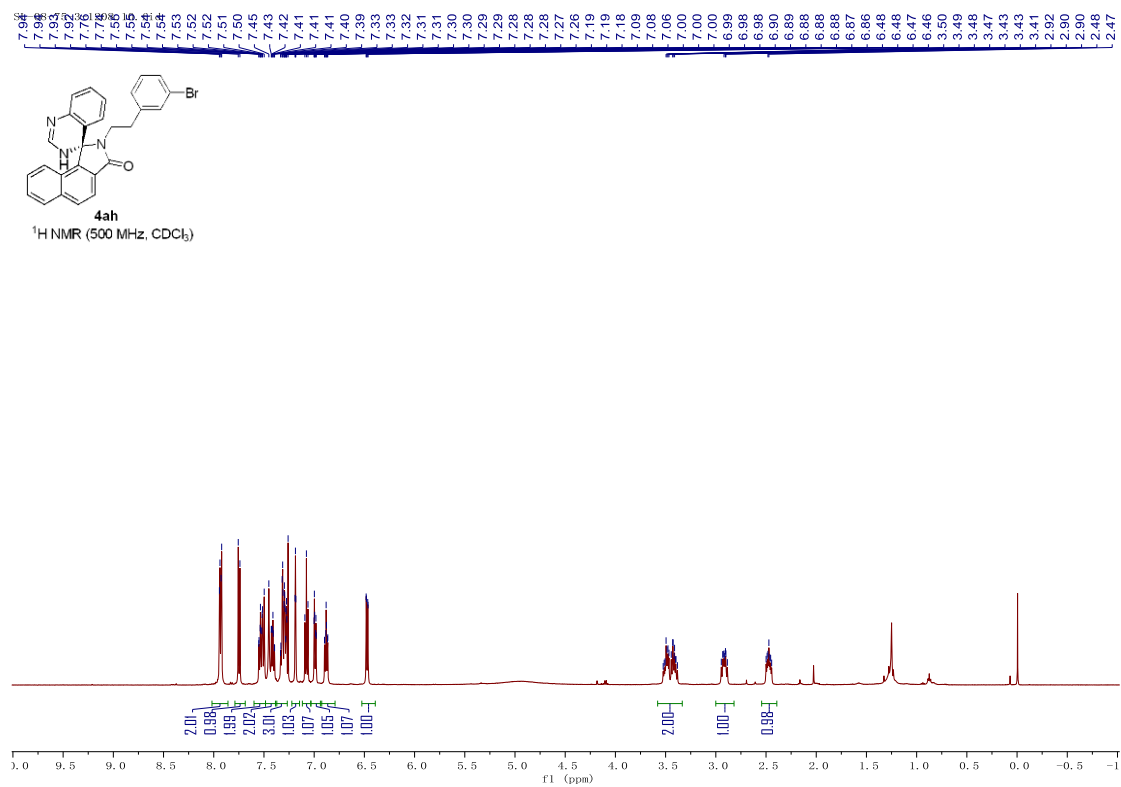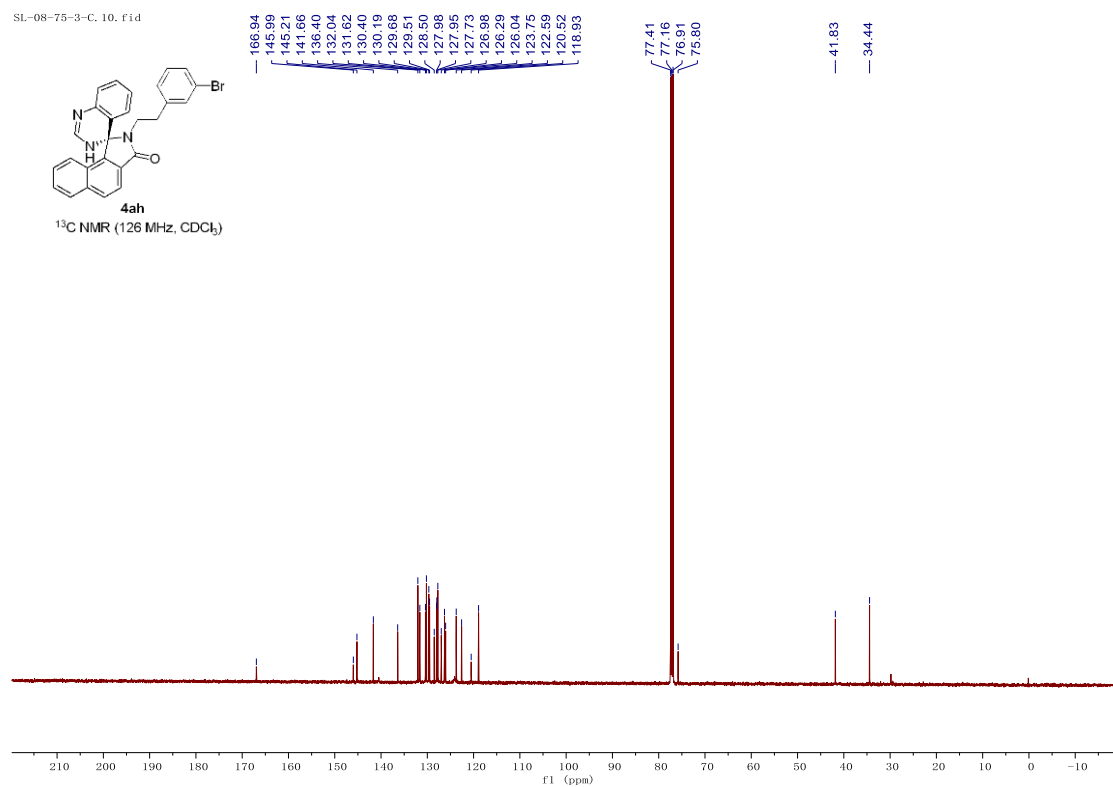

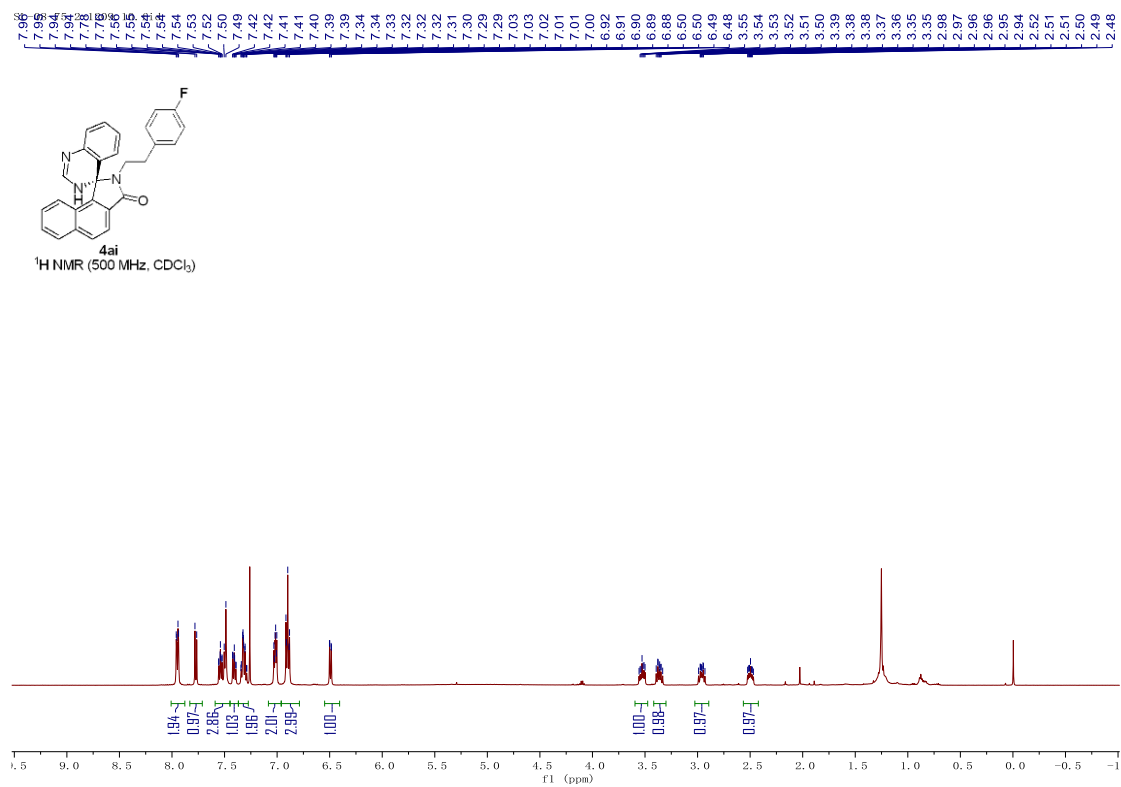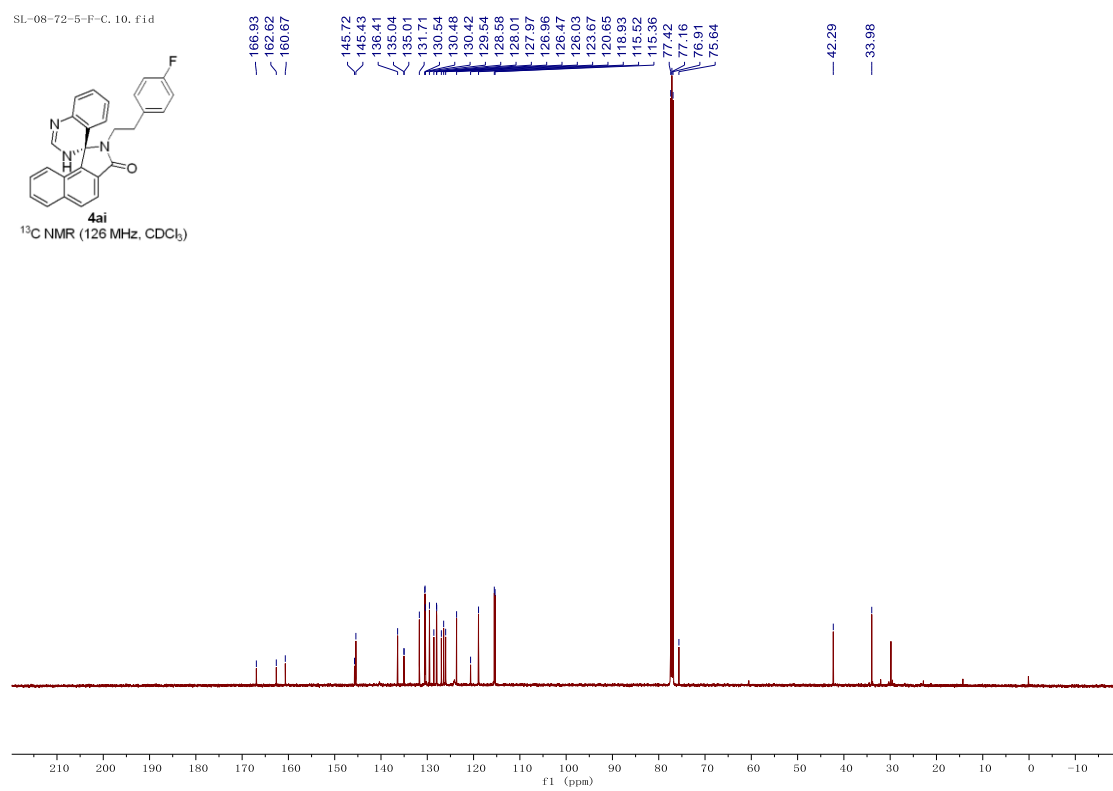

SL-08-75-2-F-2, 10, fid

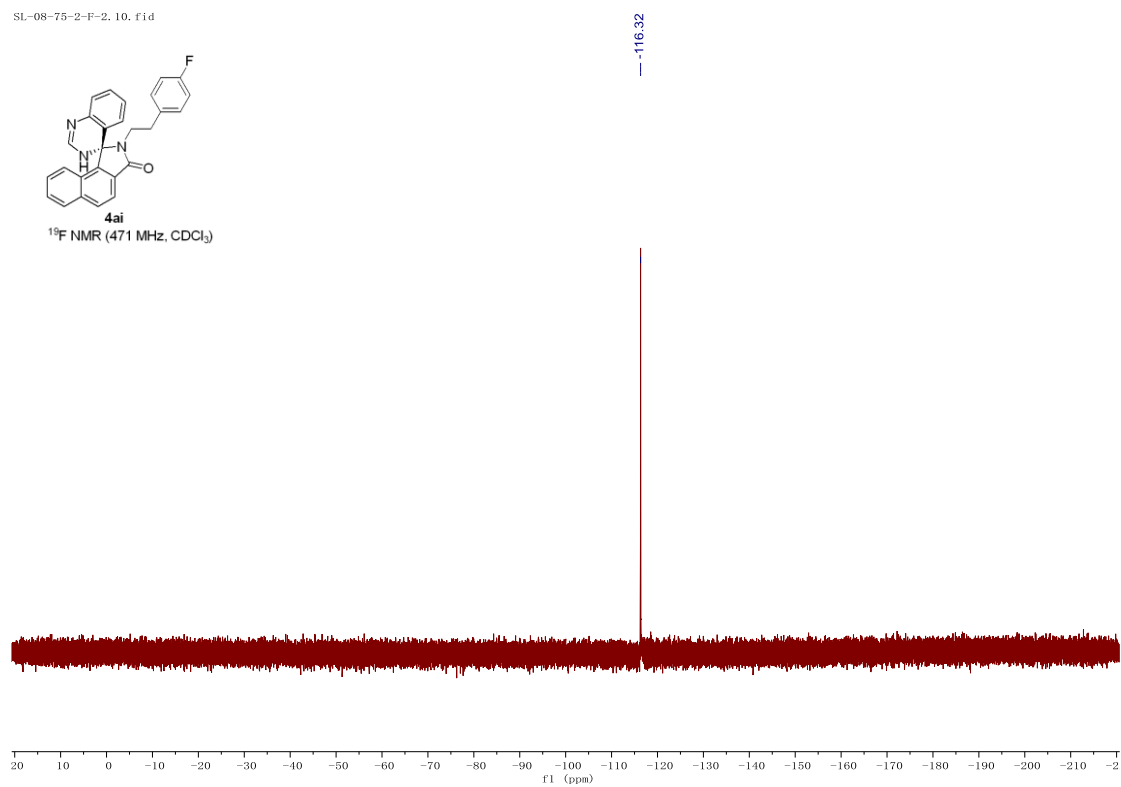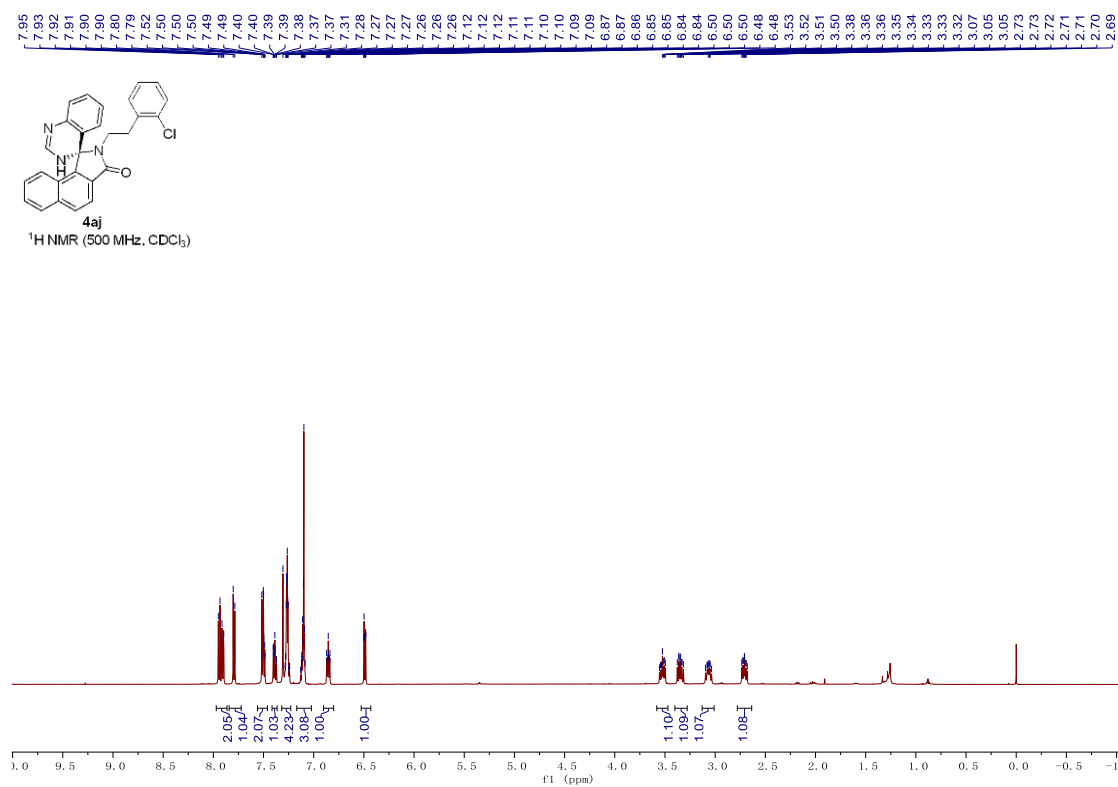

SL-10-188-05-CH.11.fid

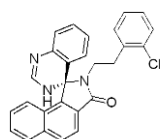

**4aj**  
<sup>13</sup>C NMR (126 MHz, CDCl<sub>3</sub>)

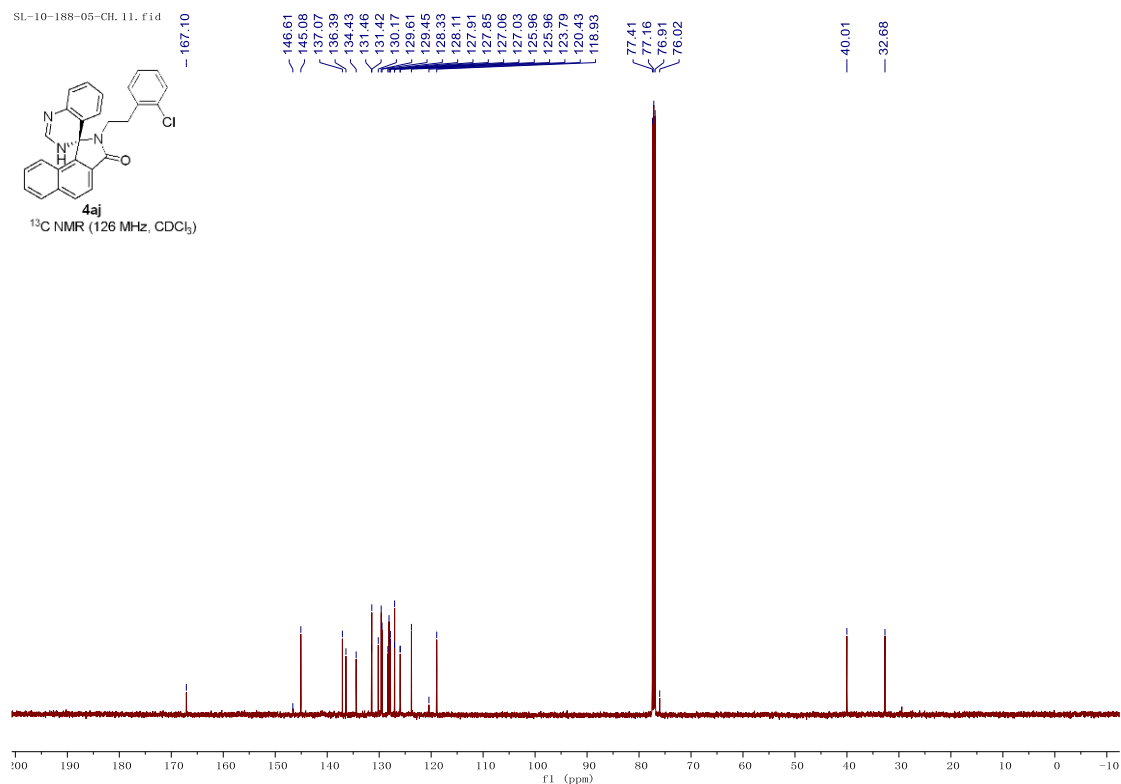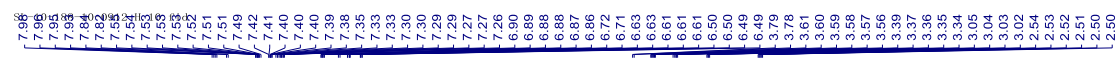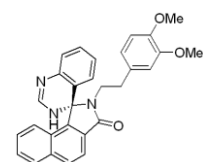

**4ak**  
<sup>1</sup>H NMR (500 MHz, CDCl<sub>3</sub>)

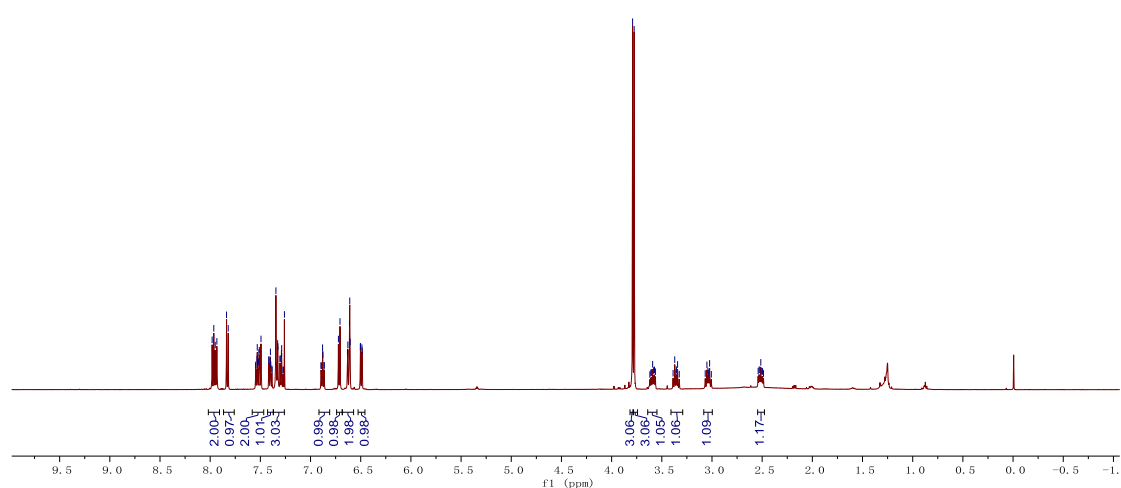

SL-10-188-10-HC, 11, f1d

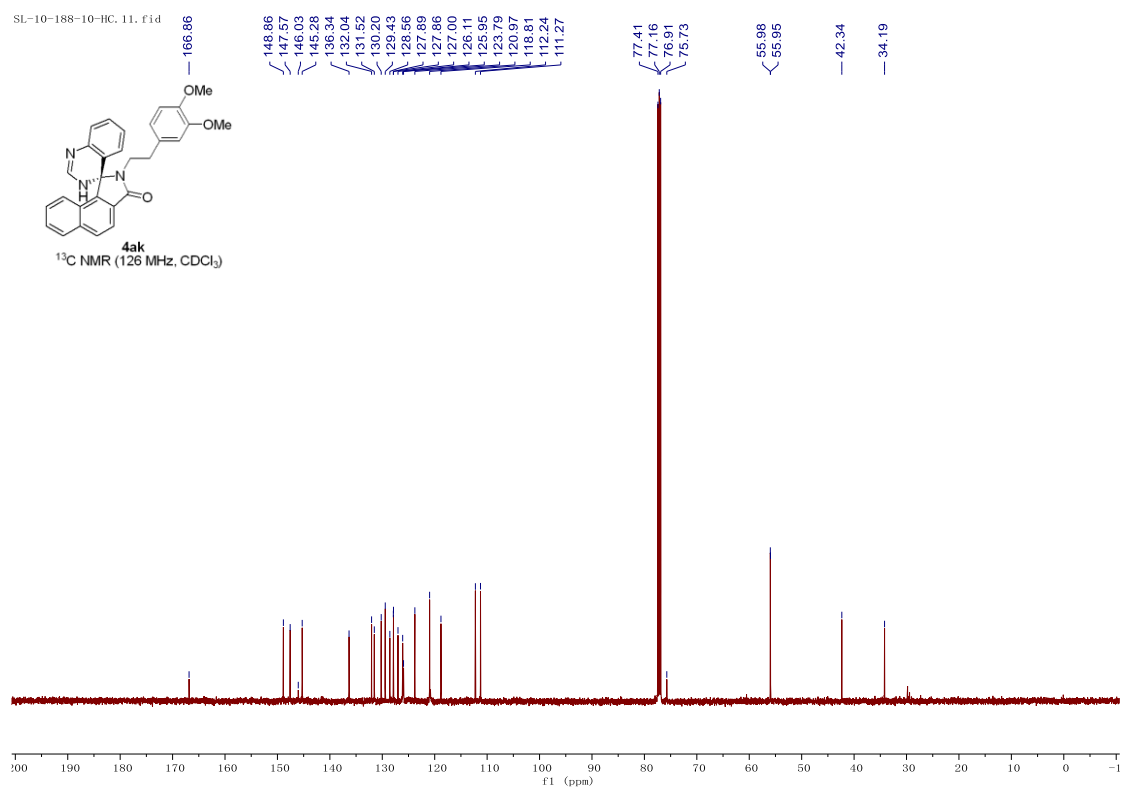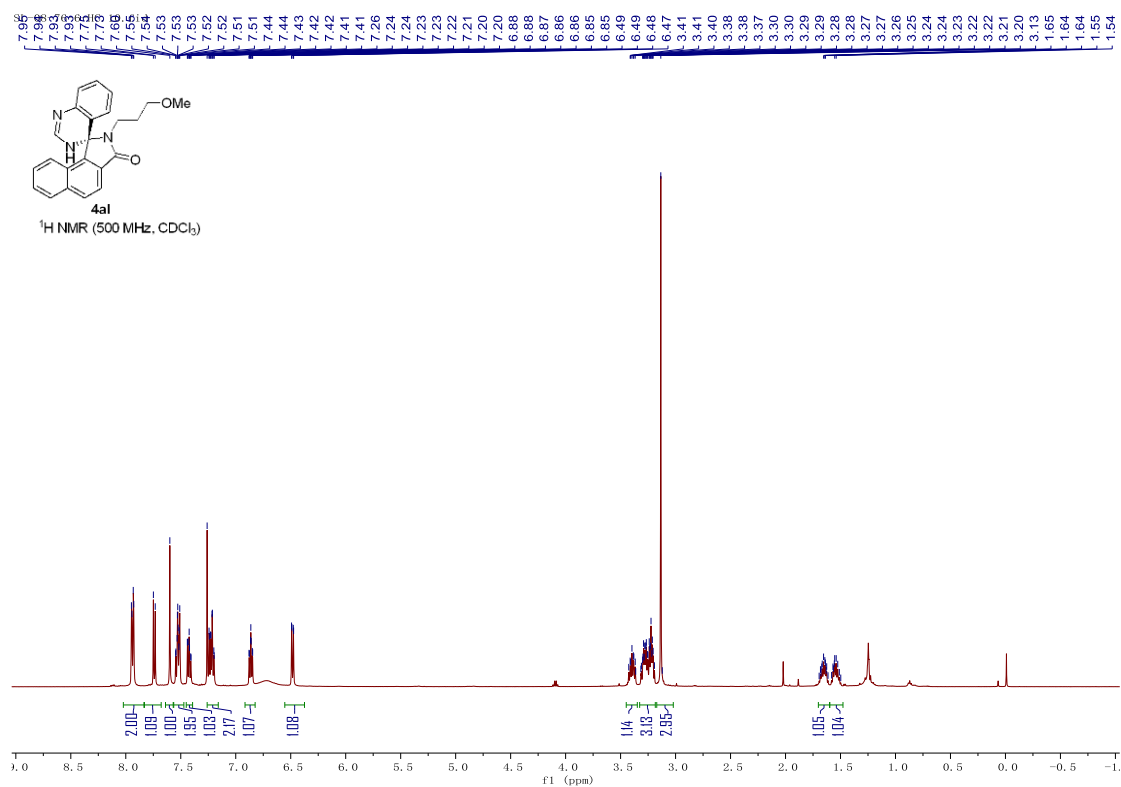





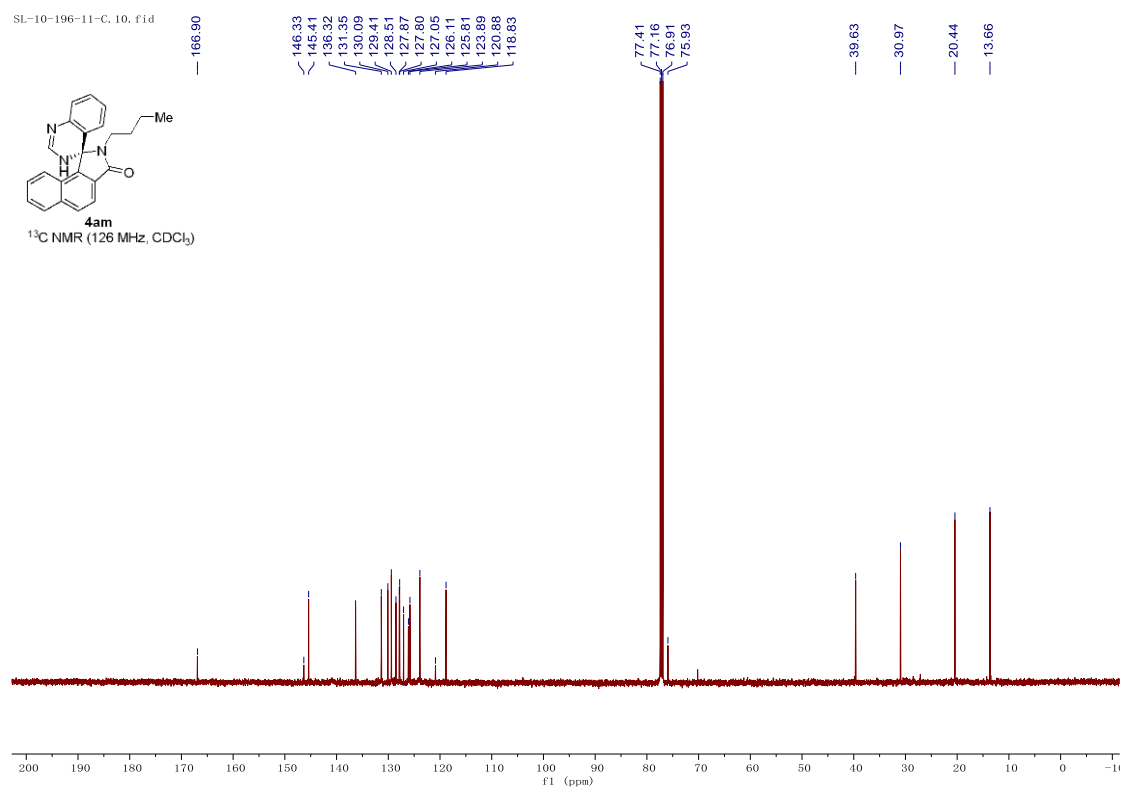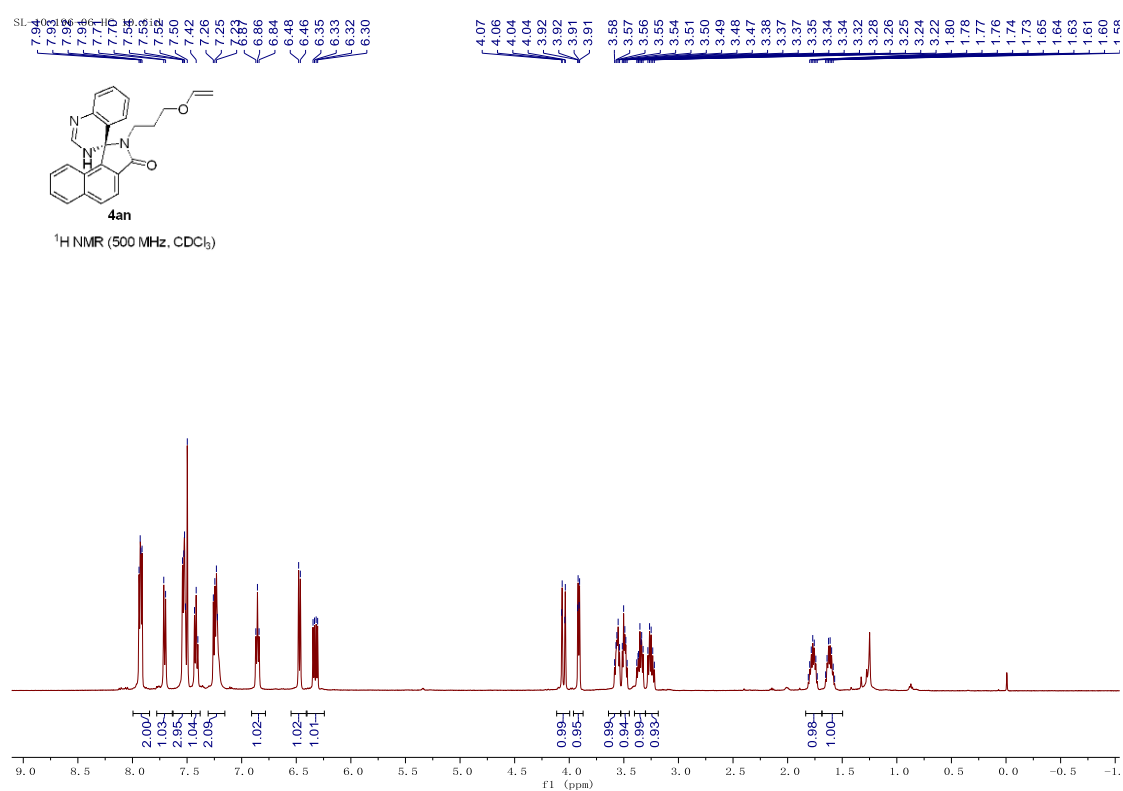

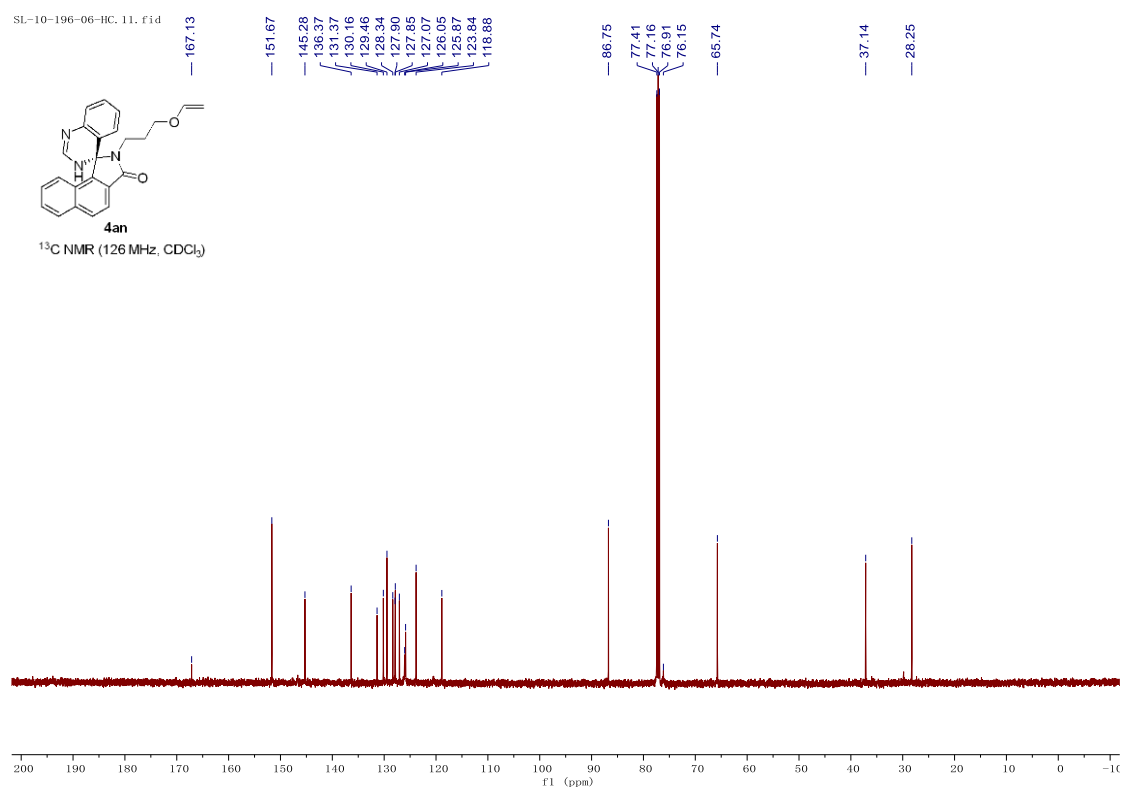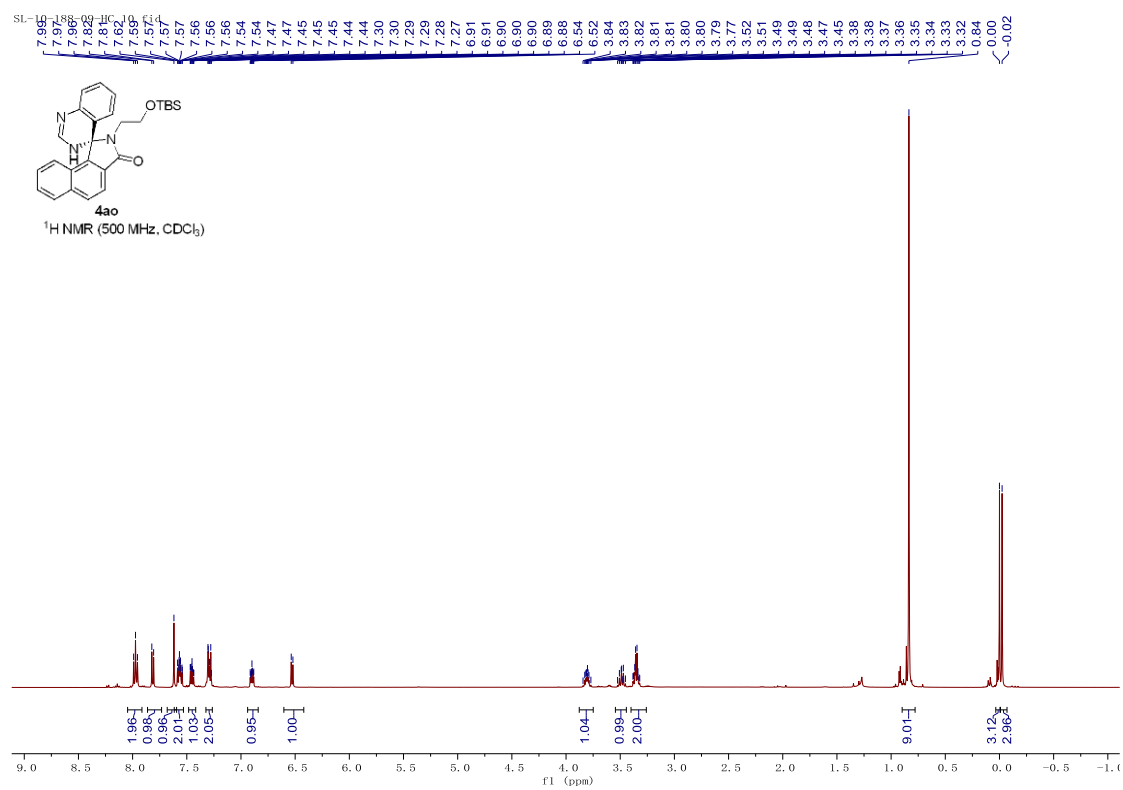

SL-10-188-09-HC, 11, f1d

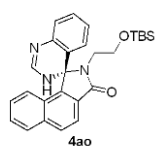

$^{13}\text{C}$  NMR (126 MHz,  $\text{CDCl}_3$ )

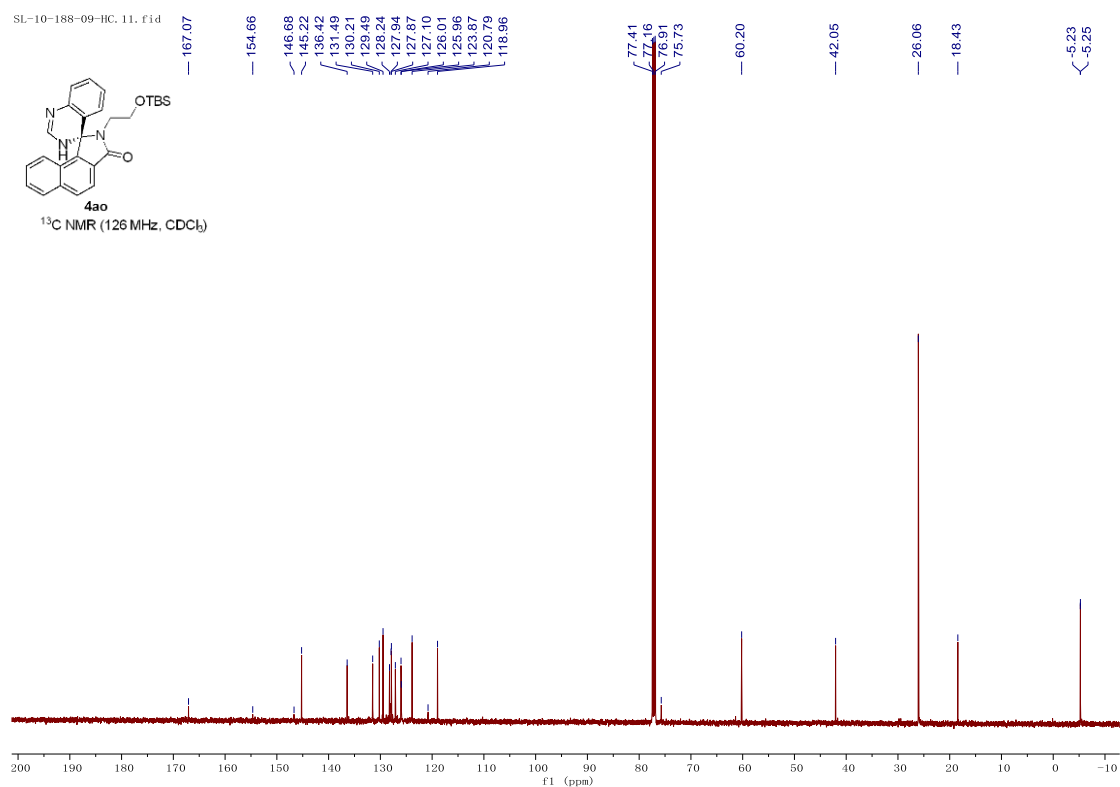

SL-10-188-09-HC, 11, f1d

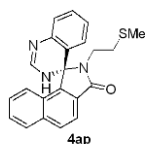

$^1\text{H}$  NMR (500 MHz,  $\text{CDCl}_3$ )

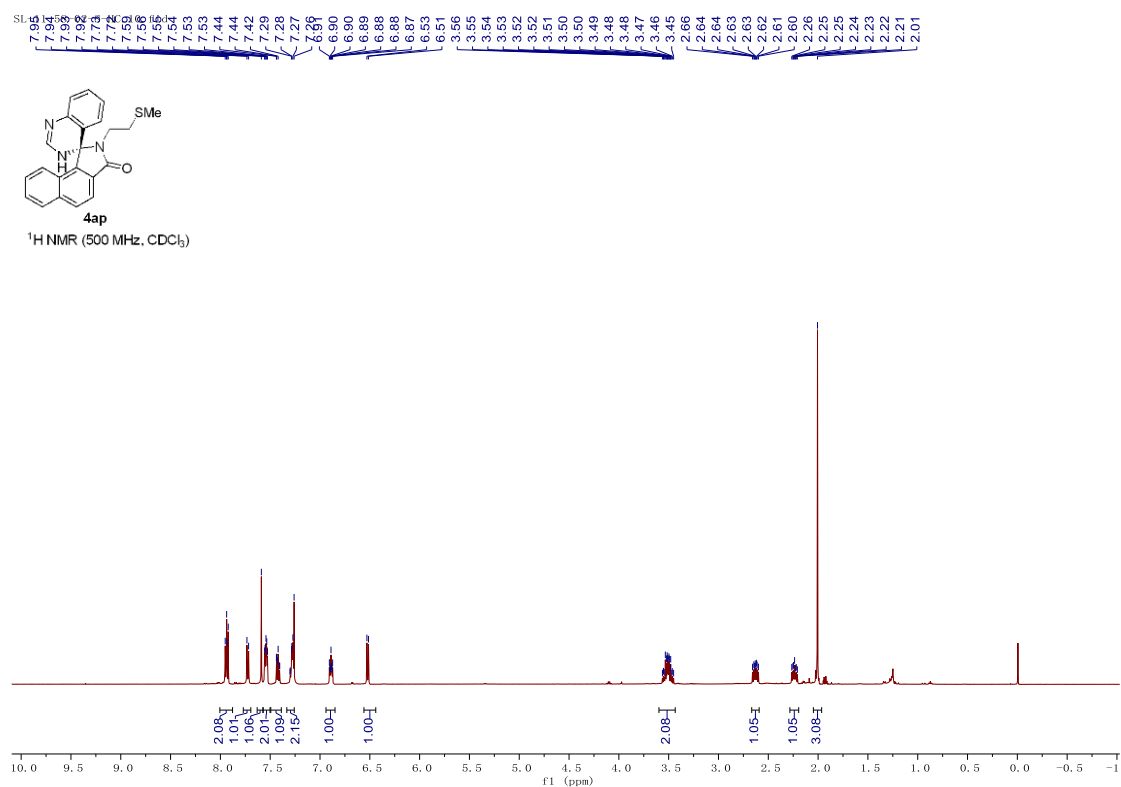

SL-11-58-02-C, 10, f1d

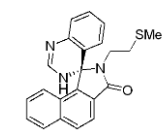

**4ap**  
 $^{13}\text{C}$  NMR (126 MHz,  $\text{CDCl}_3$ )

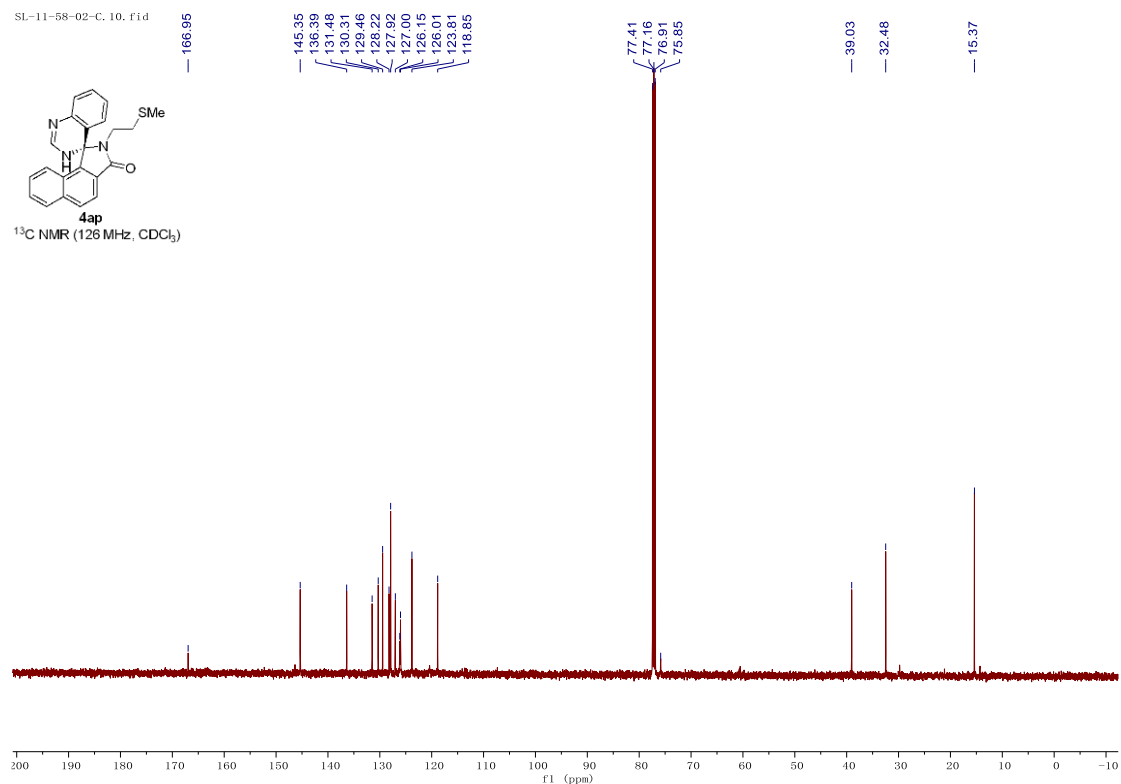

SL-11-58-02-C, 10, f1d

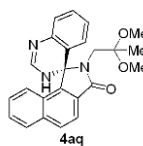

**4aq**  
 $^1\text{H}$  NMR (500 MHz,  $\text{CDCl}_3$ )

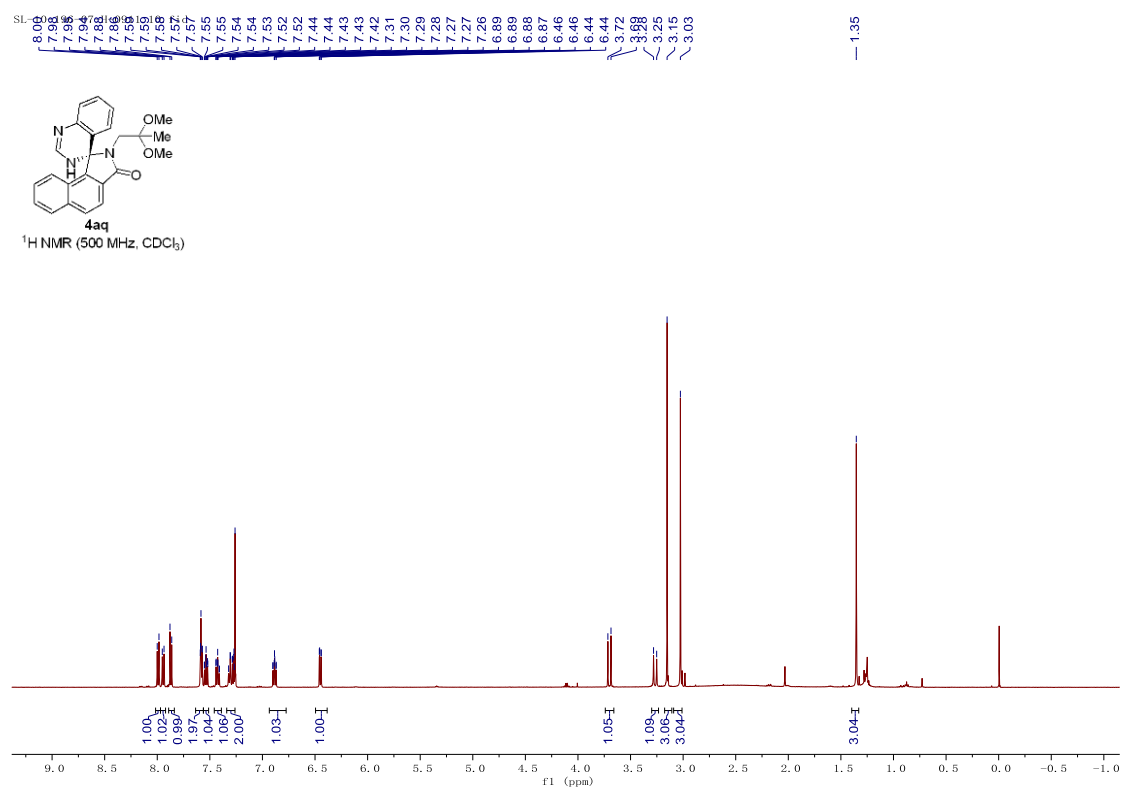

SL-10-196-07-C, 10.fid

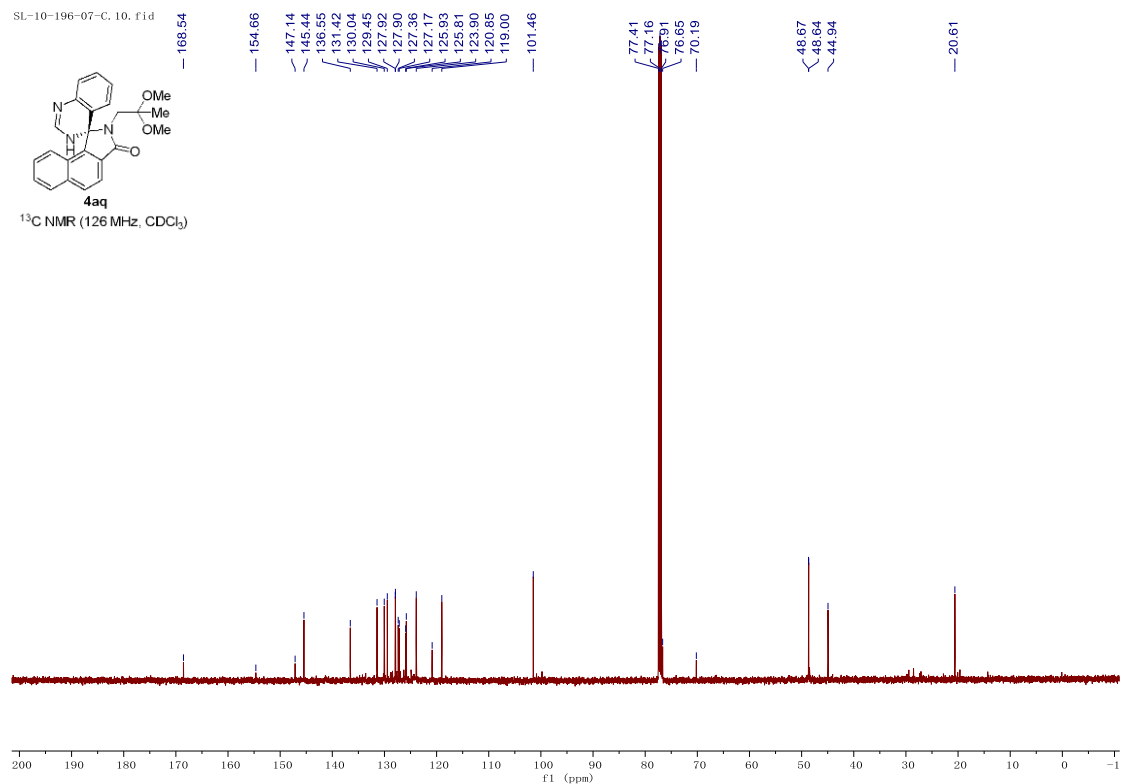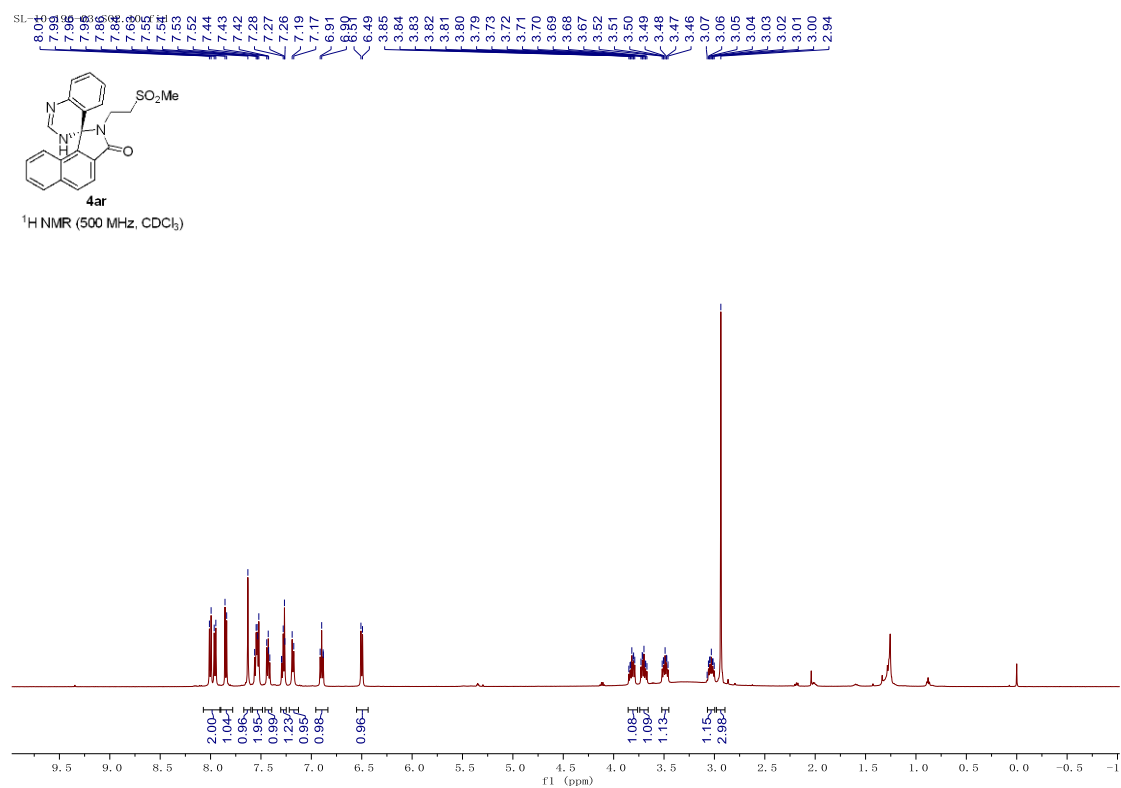

SL-10-196-03-S02, 11, f1d

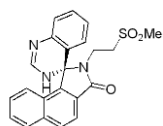

$^{13}\text{C}$  NMR (126 MHz,  $\text{CDCl}_3$ )

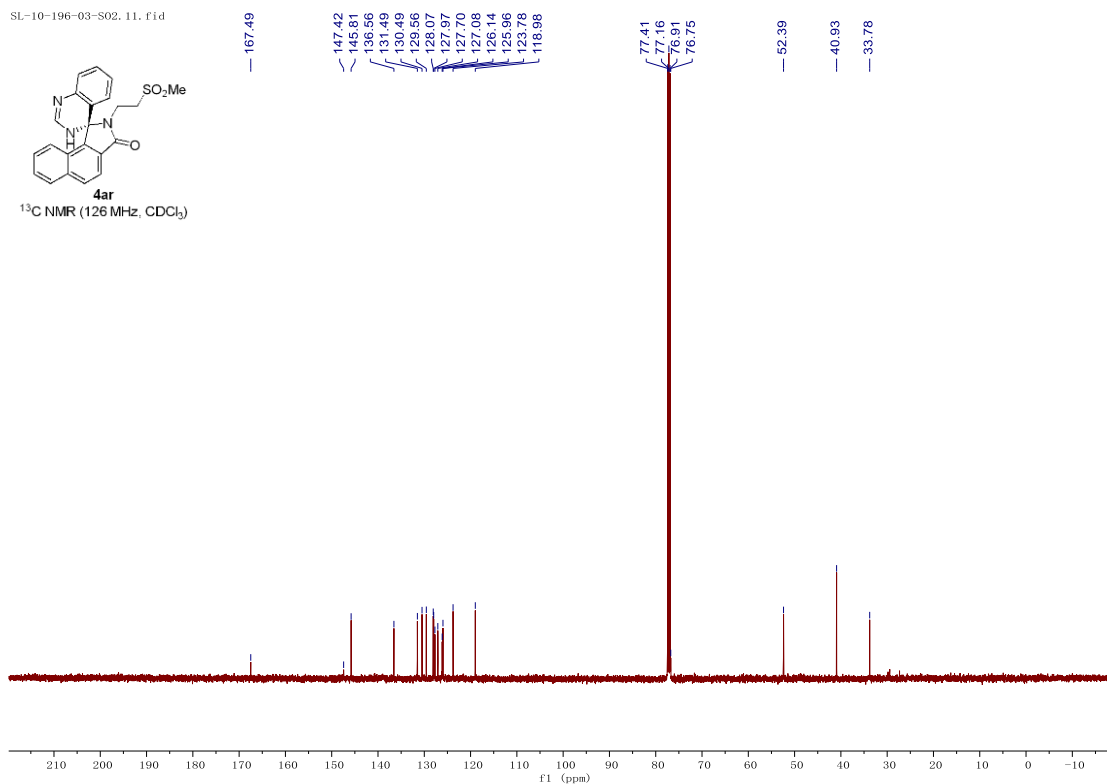

SL-09-192-4-HC, 16

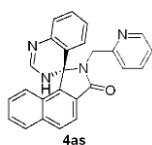

$^1\text{H}$  NMR (500 MHz,  $\text{CDCl}_3$ )

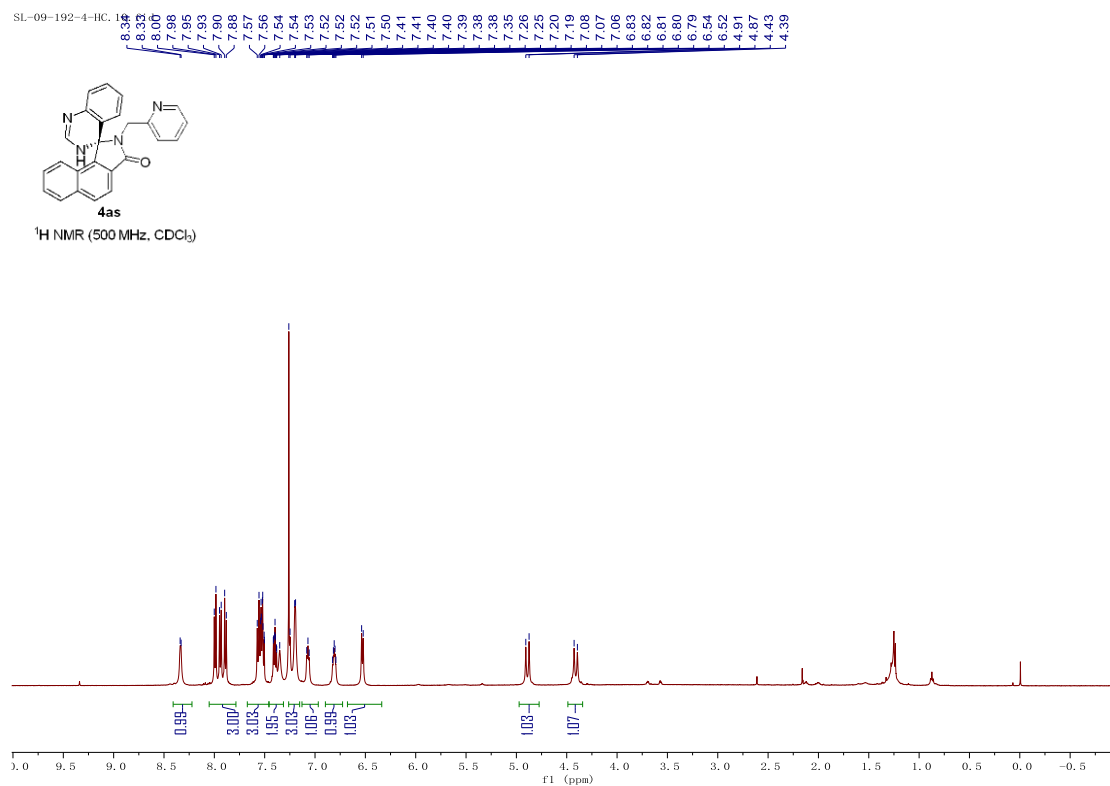

SL-09-192-4-HC, 11, f1d

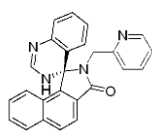

**4as**

$^{13}\text{C}$  NMR (126 MHz,  $\text{CDCl}_3$ )

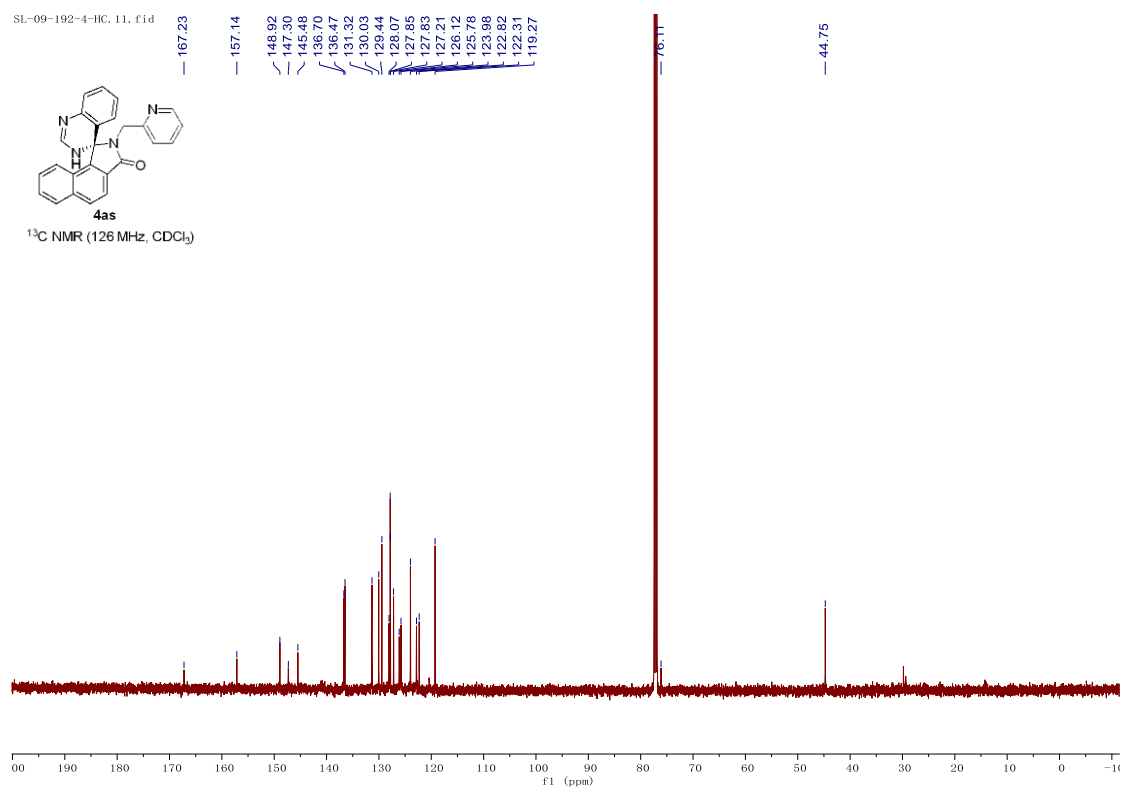

SL-09-192-4-HC, 11, f1d

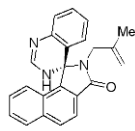

**4at**

$^1\text{H}$  NMR (500 MHz,  $\text{CDCl}_3$ )

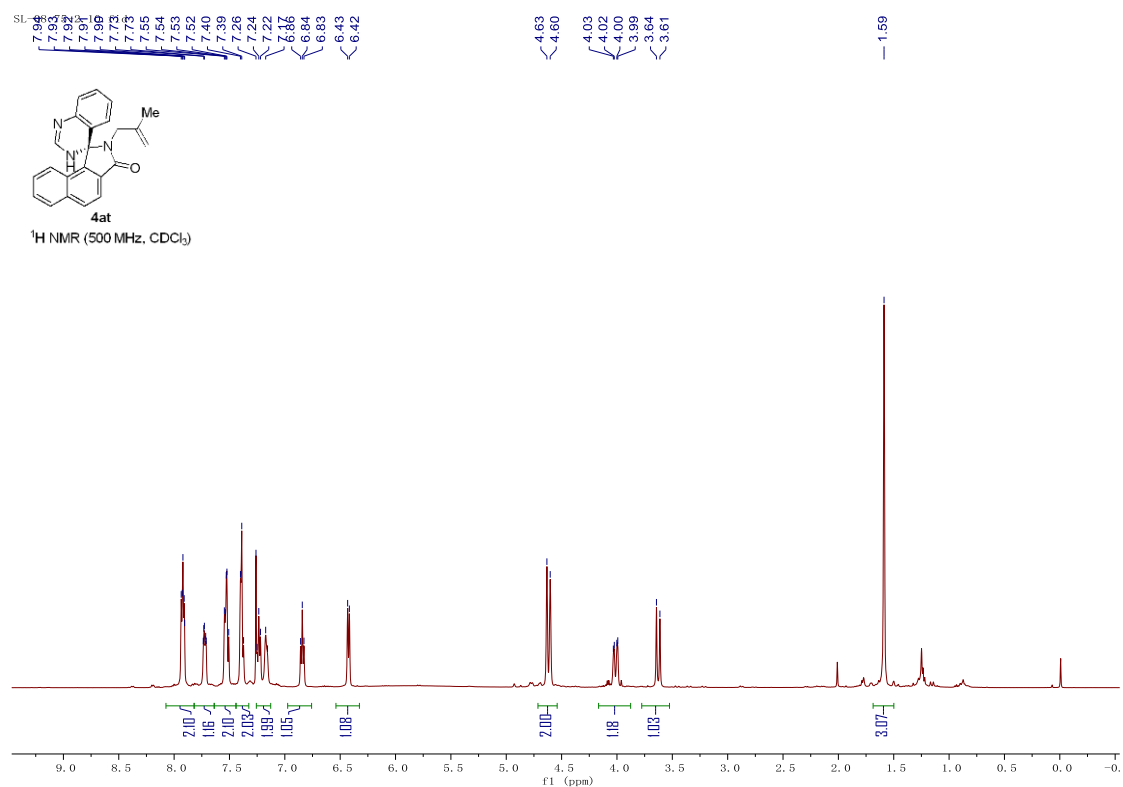



SL-08-75-5-CH. 10. f1d

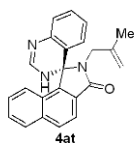

$^{13}\text{C}$  NMR (126 MHz,  $\text{CDCl}_3$ )

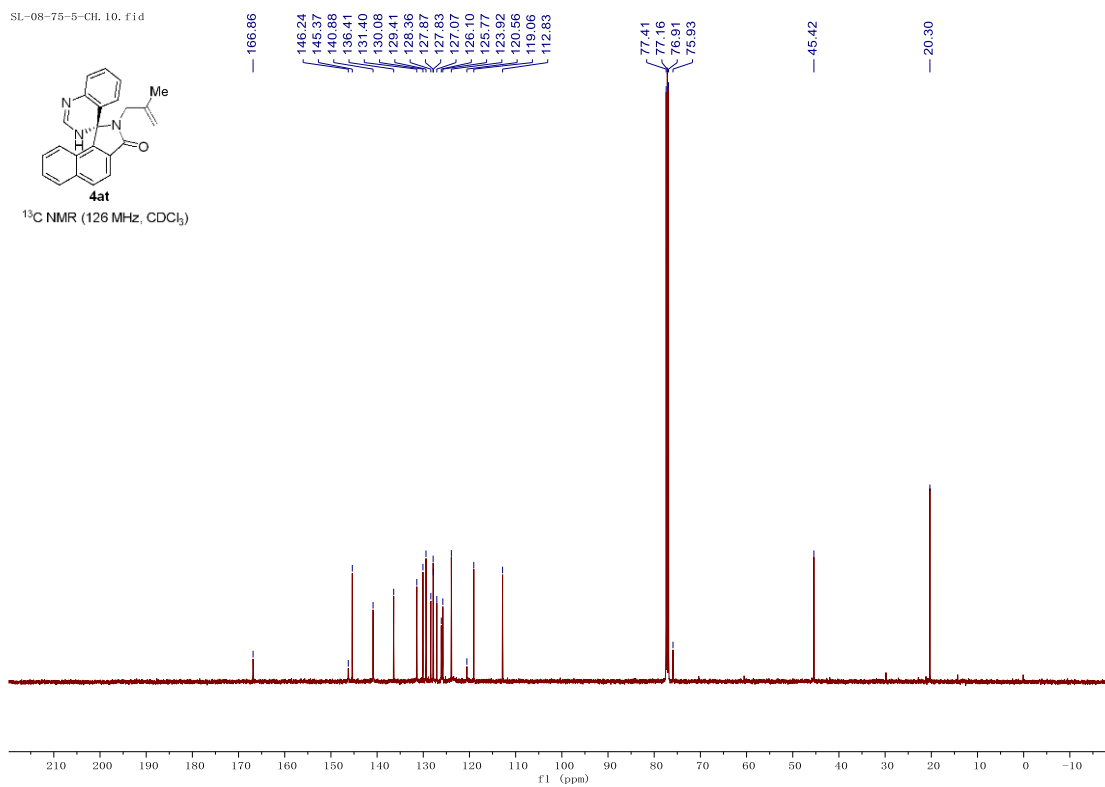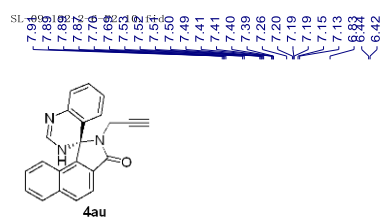

$^1\text{H}$  NMR (500 MHz,  $\text{CDCl}_3$ )

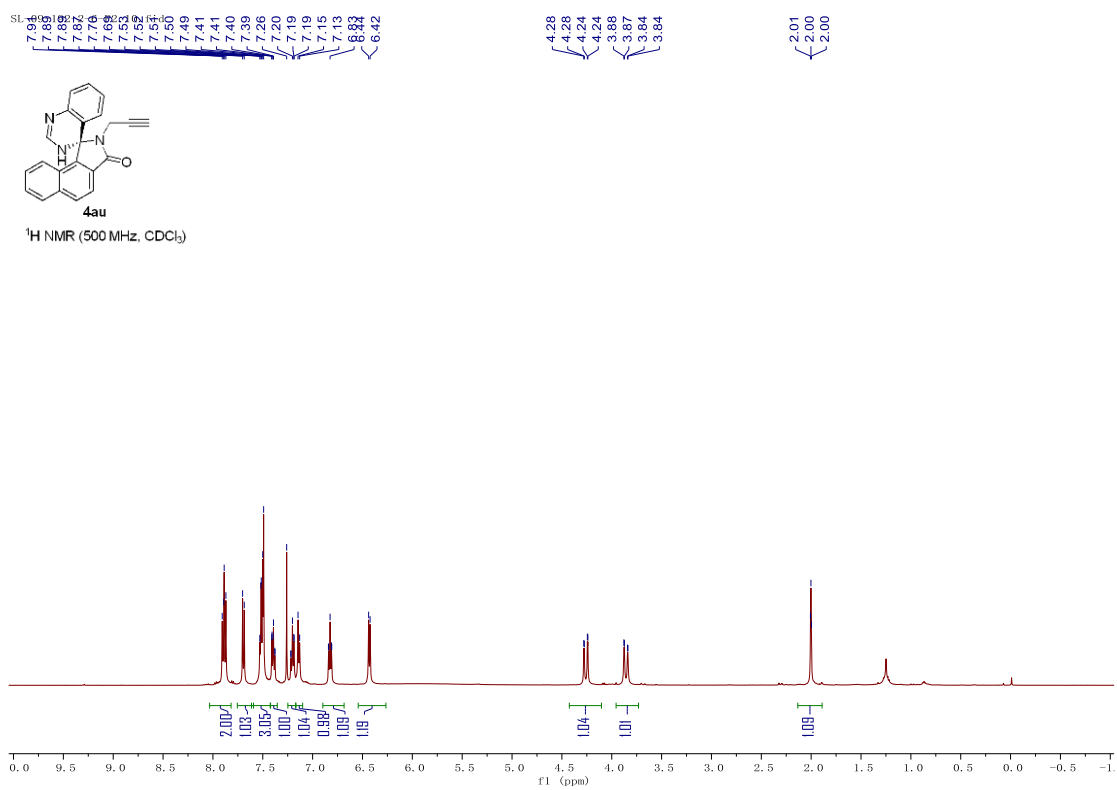

SL-09-192-2-6-P2, 11, F1d

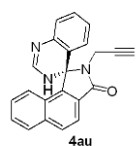

$^{13}\text{C}$  NMR (126 MHz,  $\text{CDCl}_3$ )

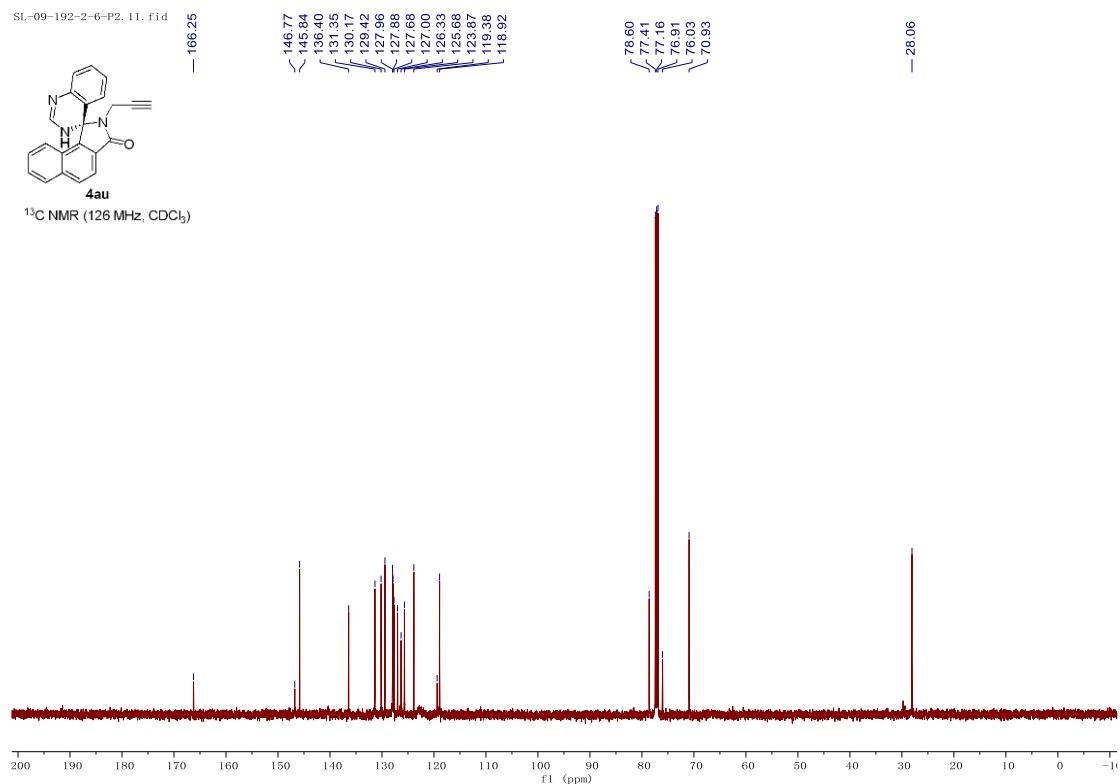

SL-

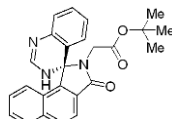

$^1\text{H}$  NMR (500 MHz,  $\text{CDCl}_3$ )

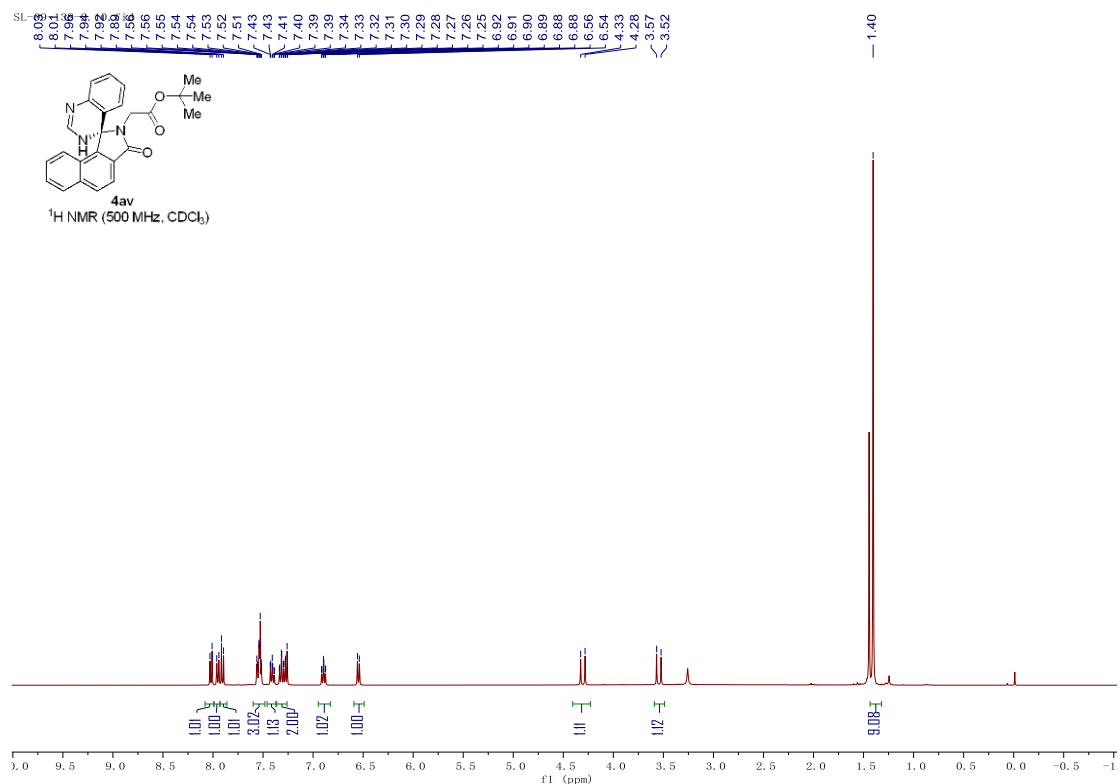

SL-09-138-2-CH. 45. f1d

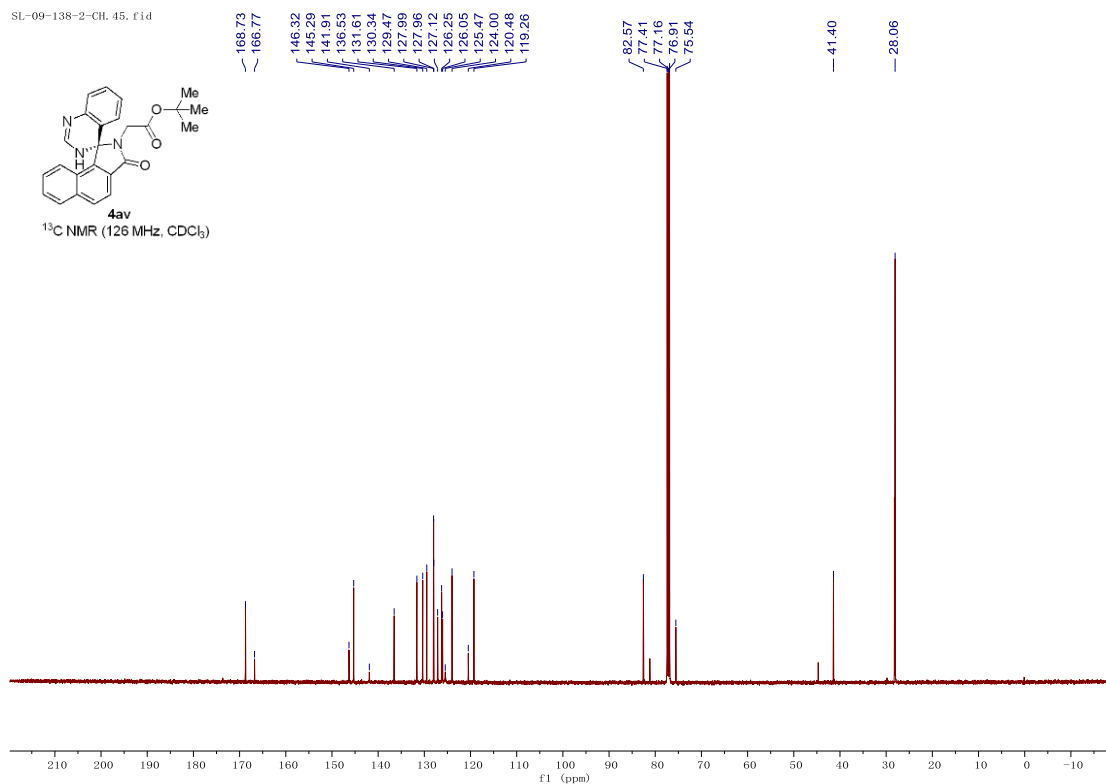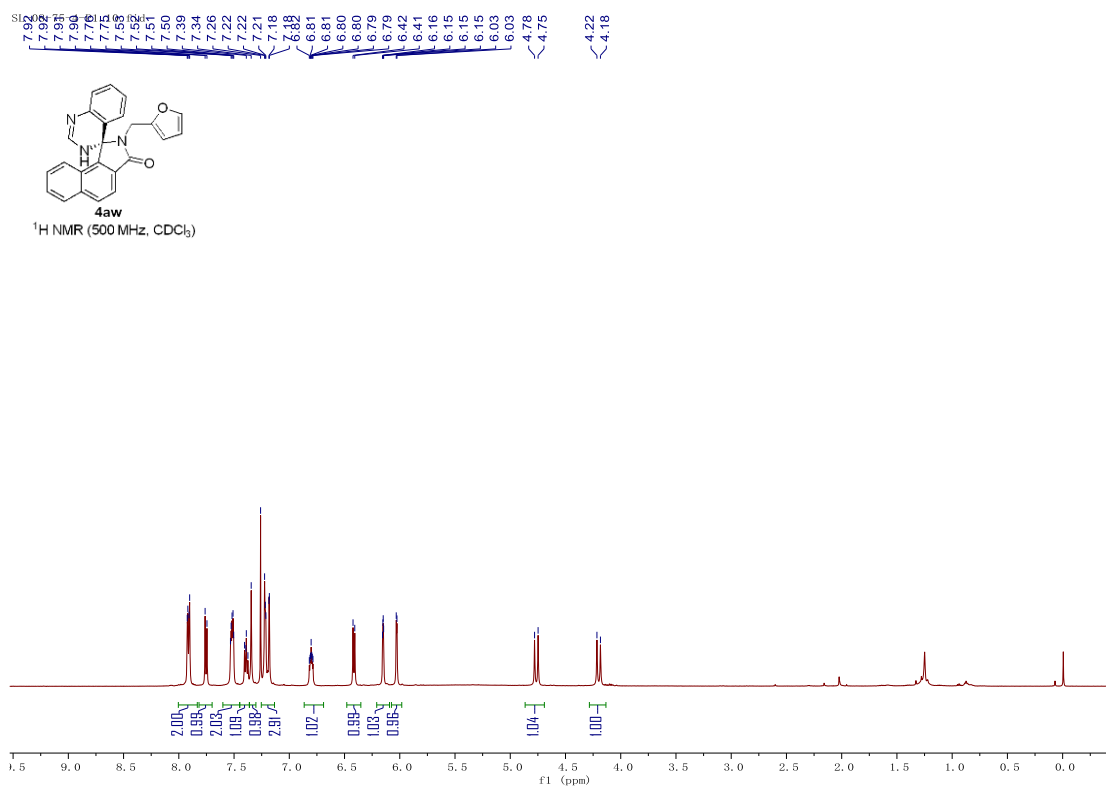



SL-10-188-02-C, 10.fid

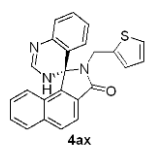

$^{13}\text{C}$  NMR (126 MHz,  $\text{CDCl}_3$ )

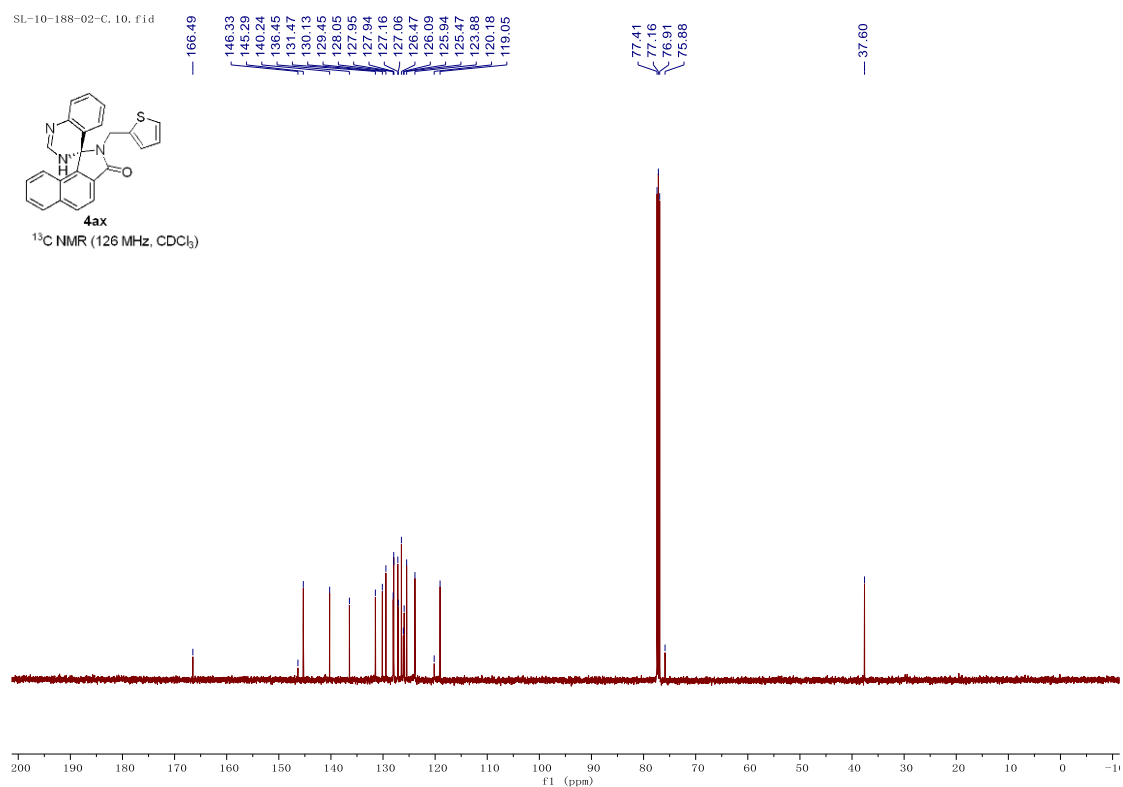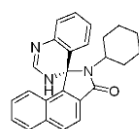

$^1\text{H}$  NMR (500 MHz,  $\text{CDCl}_3$ )

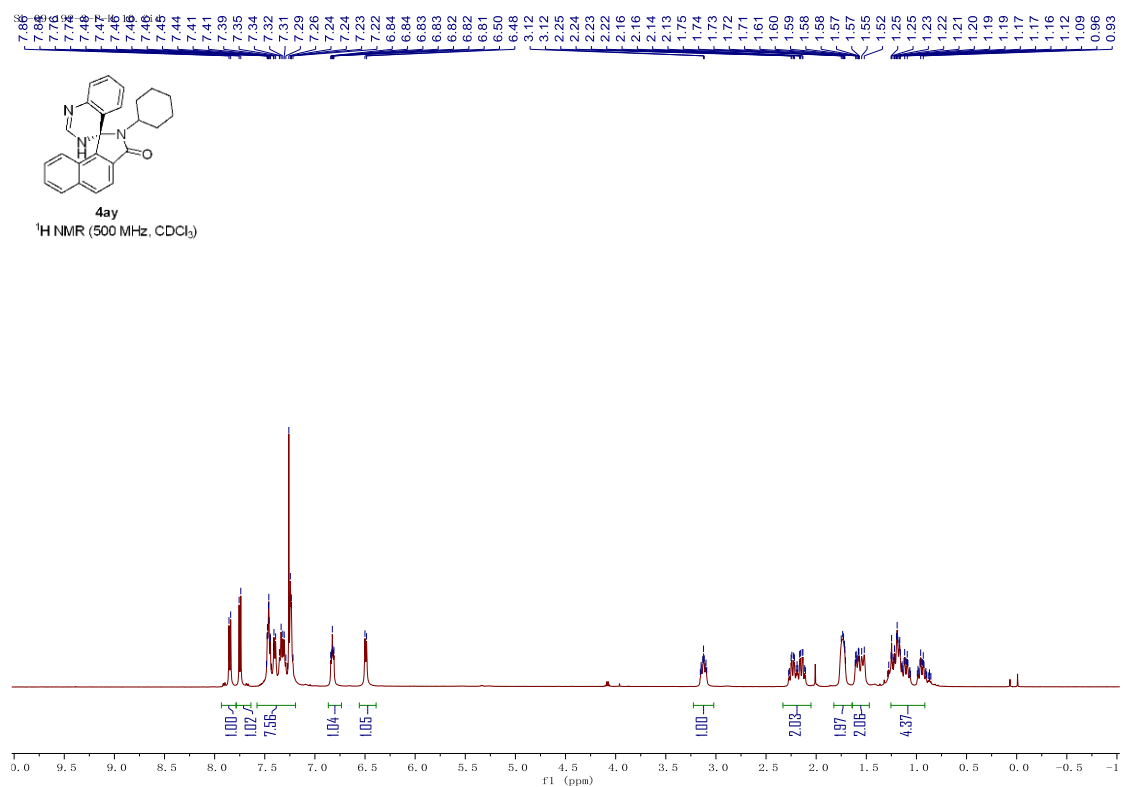

SL-09-192-3-HC, 23, f1d

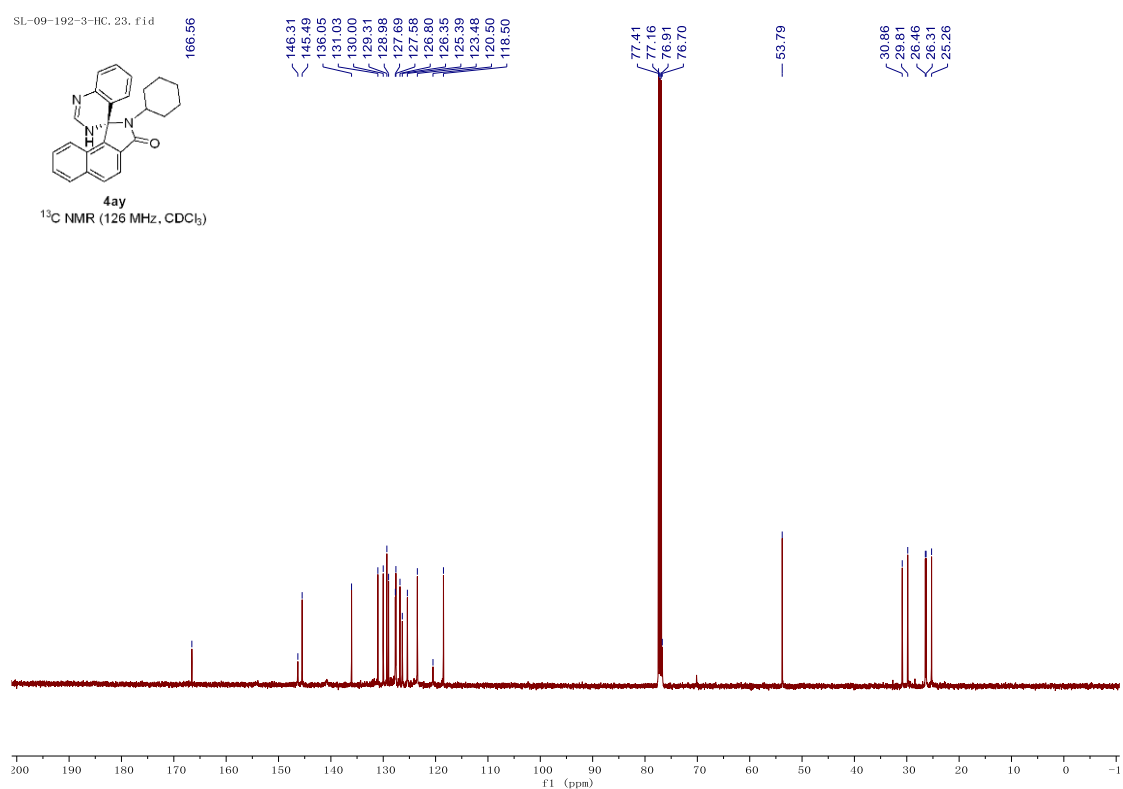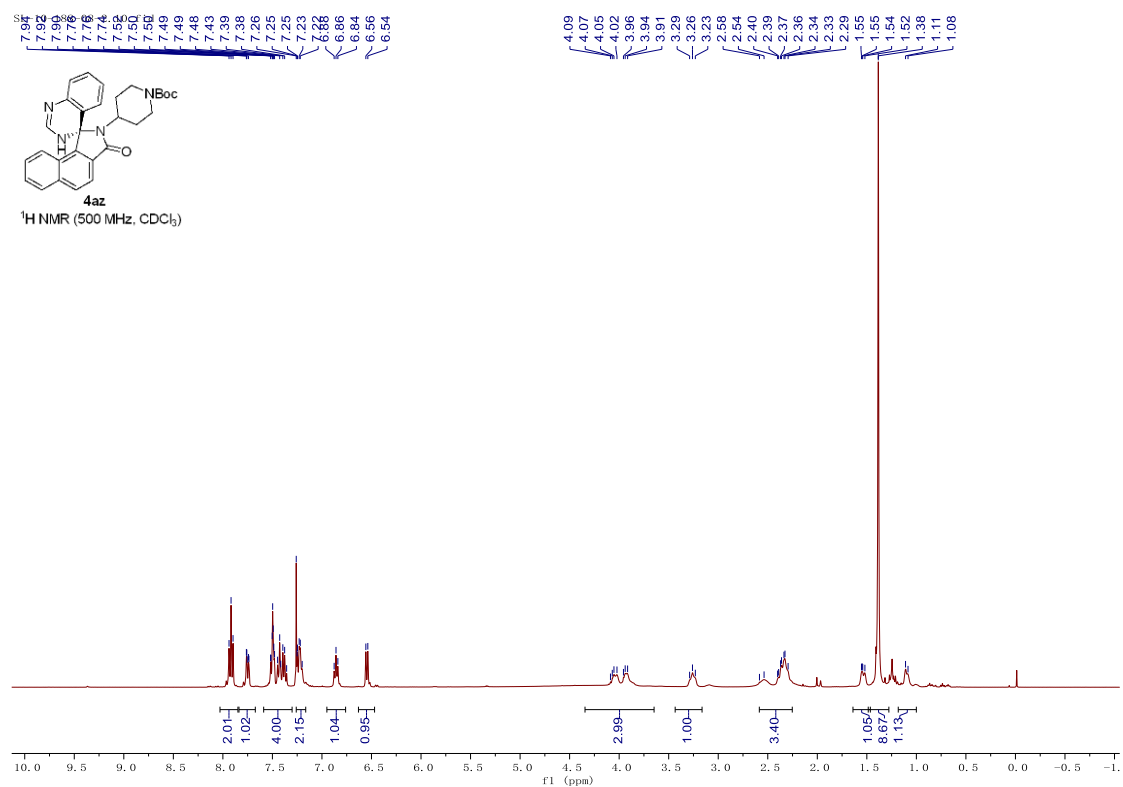

SL-10-188-08-C\_20.fid

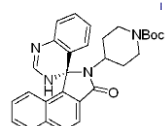

$^{13}\text{C}$  NMR (126 MHz,  $\text{CDCl}_3$ )

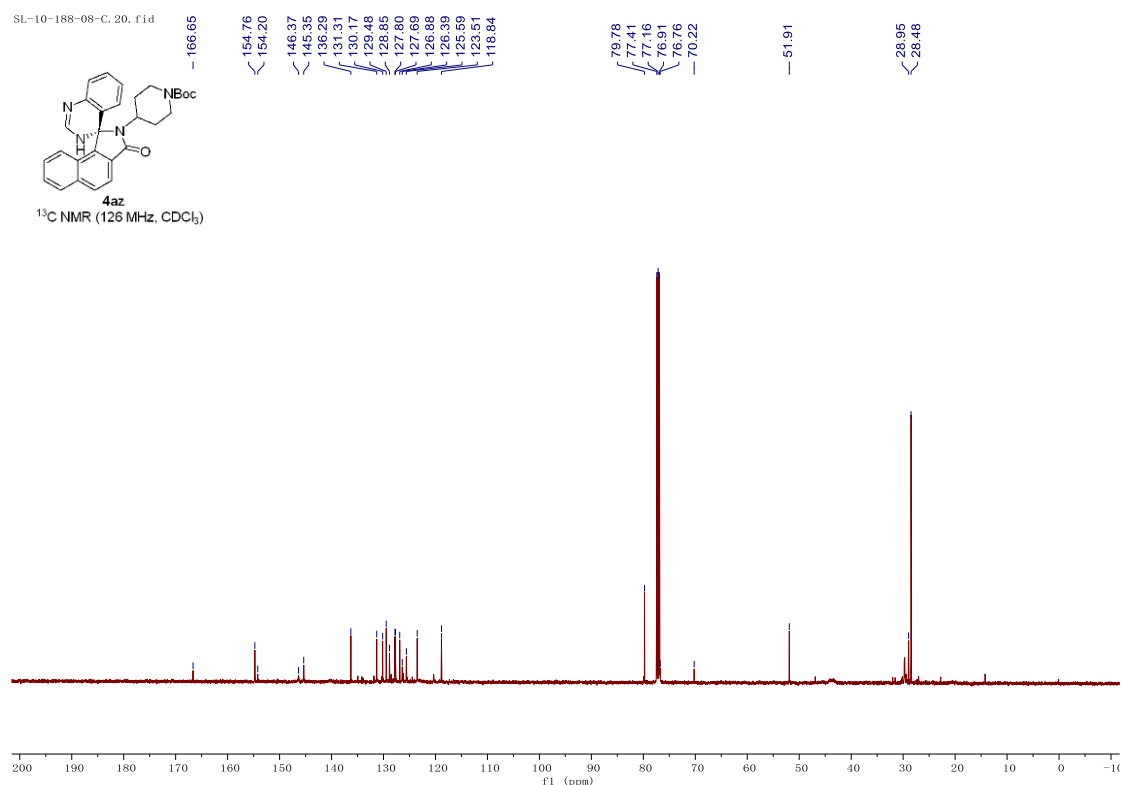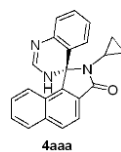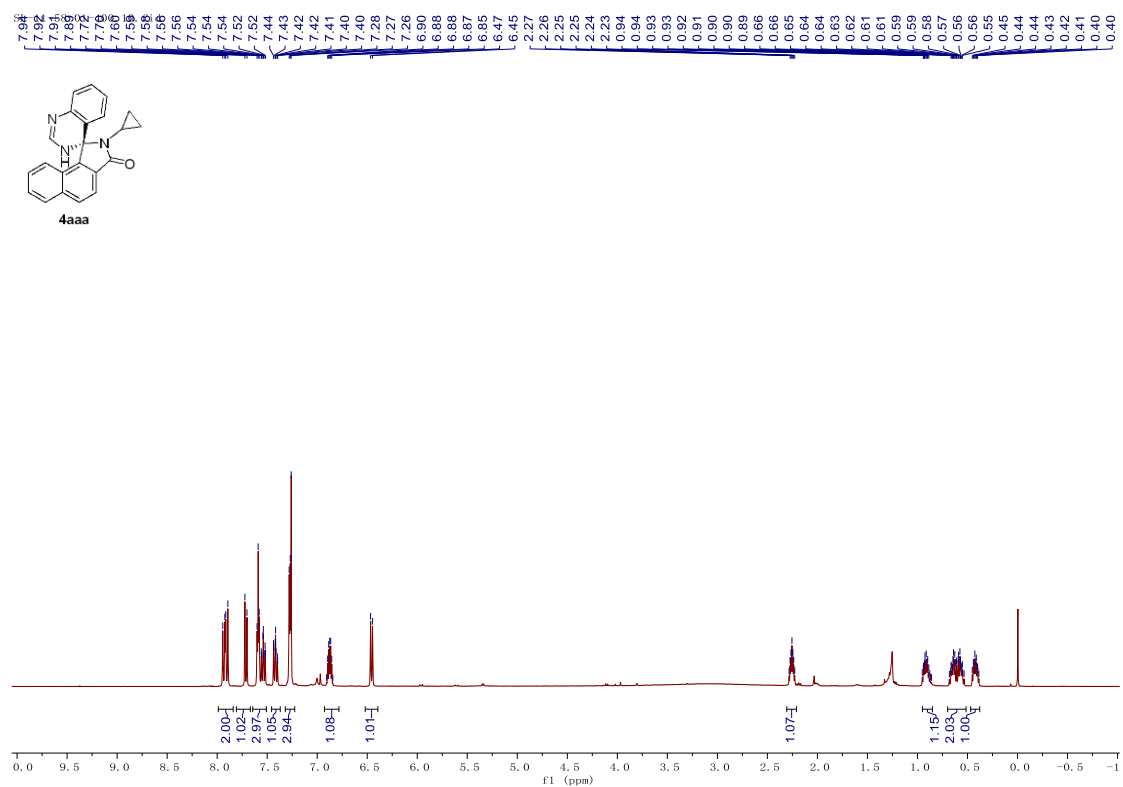

SL-11-58-01-C.10.fid

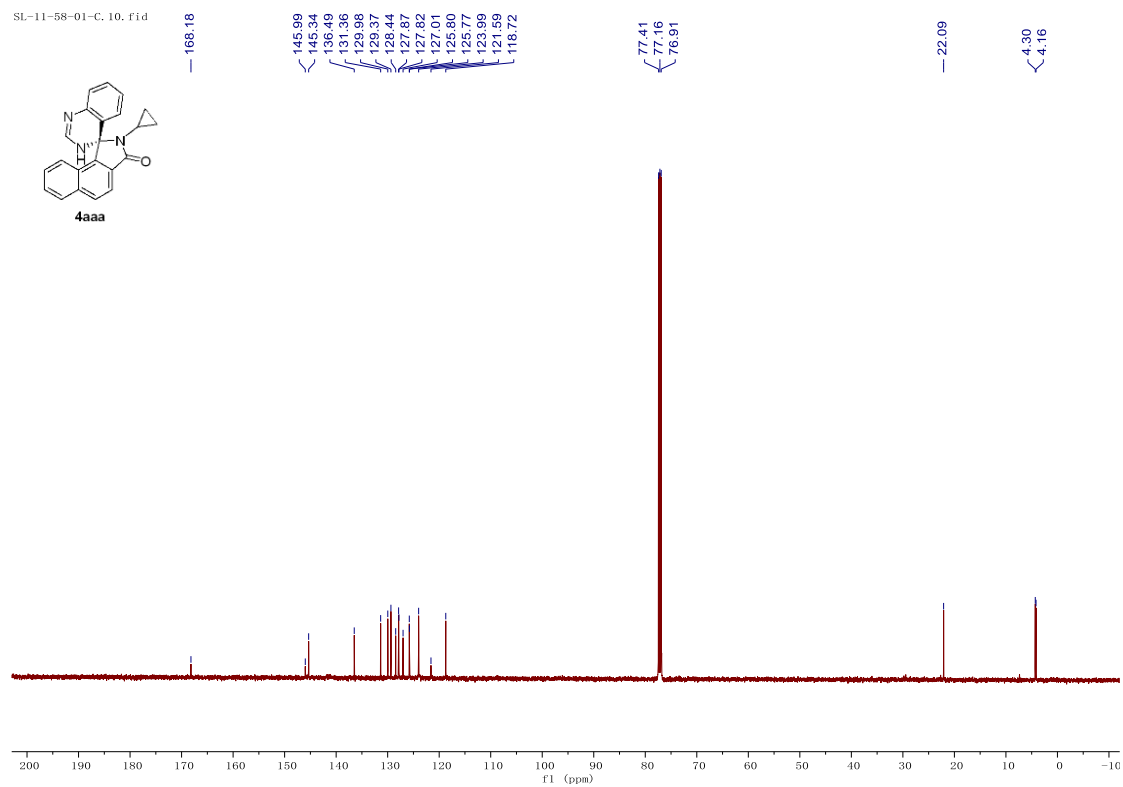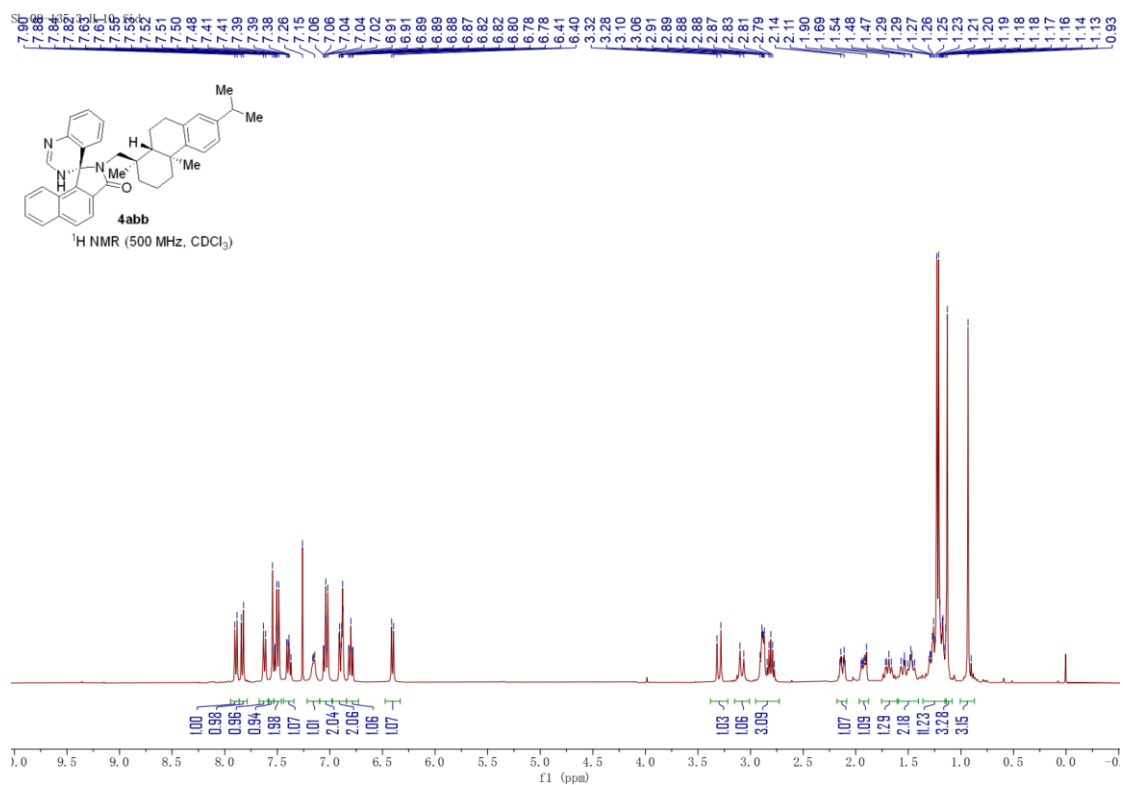



SL-09-135-3-1C, 10. f1d

**4abb**

$^{13}\text{C}$  NMR (126 MHz,  $\text{CDCl}_3$ )

171.83  
166.83  
145.32  
143.60  
136.46  
135.06  
131.43  
129.98  
129.43  
127.89  
127.79  
127.65  
127.09  
126.99  
126.21  
125.96  
123.83  
123.69  
123.58  
118.79  
77.41  
77.46  
76.91  
52.92  
46.09  
38.45  
37.98  
37.60  
37.25  
33.57  
29.72  
25.49  
24.20  
24.11  
19.75  
19.47  
18.78

**4acc**

<sup>1</sup>H NMR (500 MHz, CD<sub>2</sub>Cl<sub>2</sub>)

Chemical structure of **4acc** is shown above the spectrum. The structure features a tricyclic indole-like core with a carbonyl group, a methoxy group, and a 4-chlorophenyl group. The spectrum displays characteristic signals for these functional groups, including aromatic protons, methoxy singlets, and aliphatic protons.

SL-09-135-4-C-CD2Cl2, 10. fid

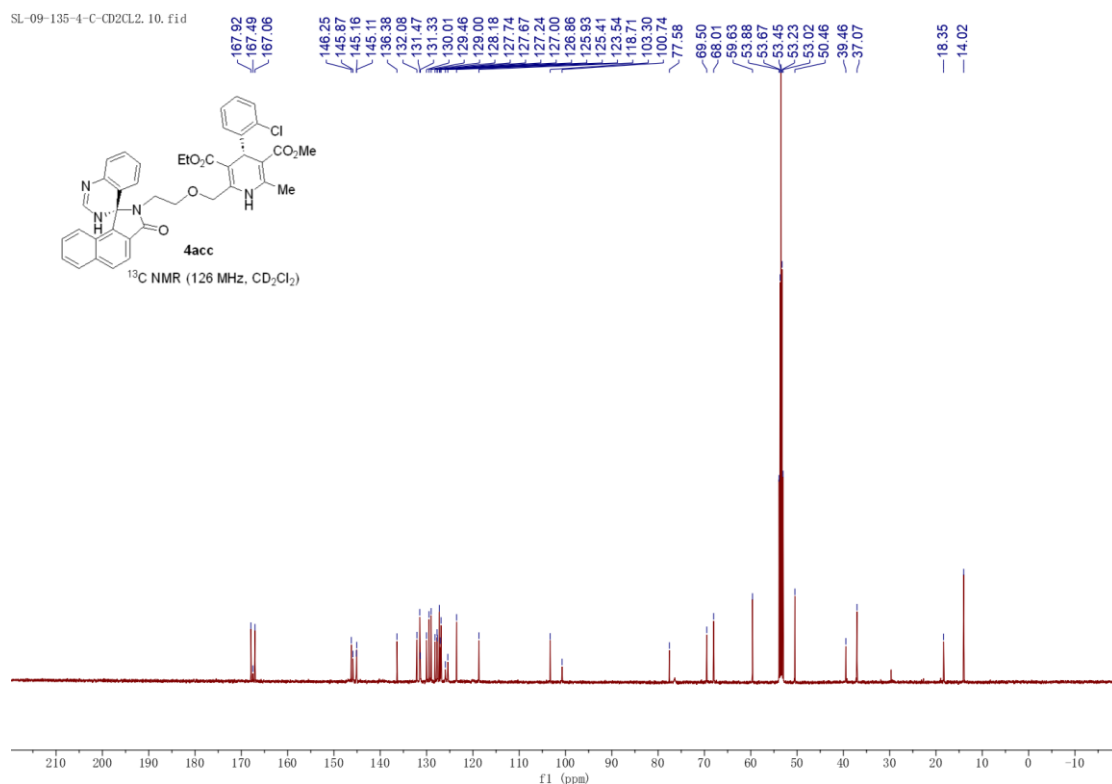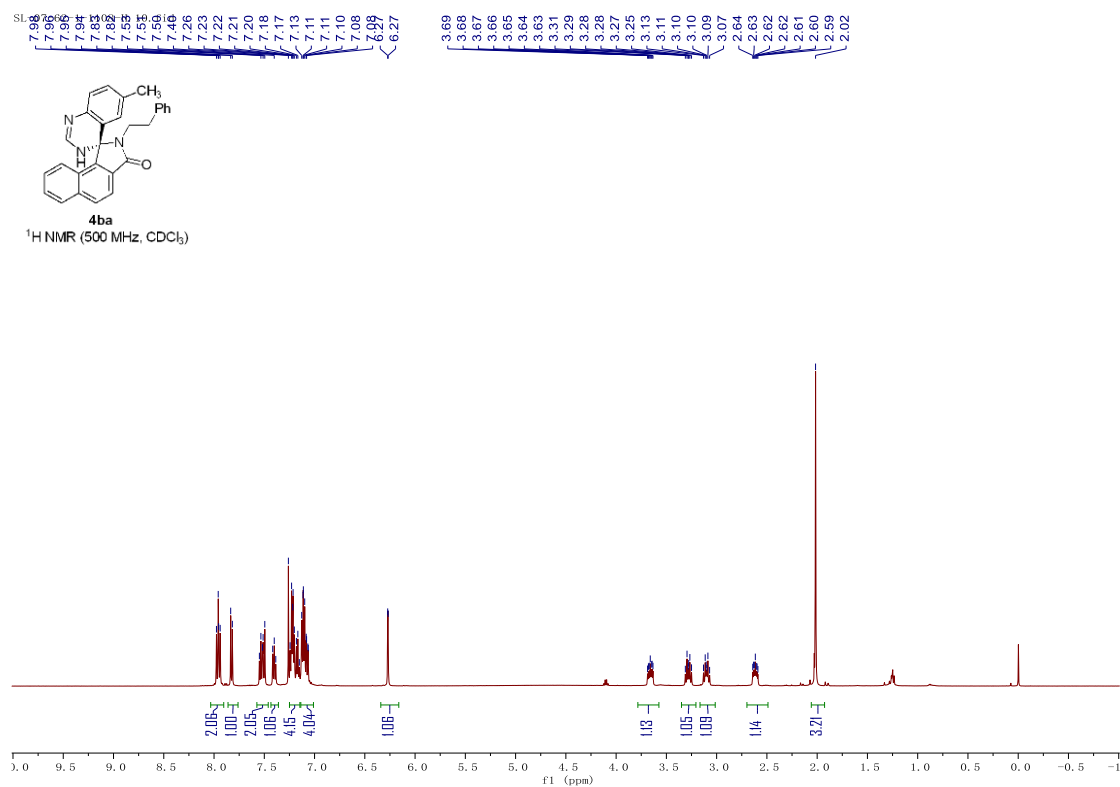

SL-07-62-1-C, 10, f1d

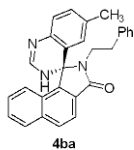

$^{13}\text{C}$  NMR (126 MHz,  $\text{CDCl}_3$ )

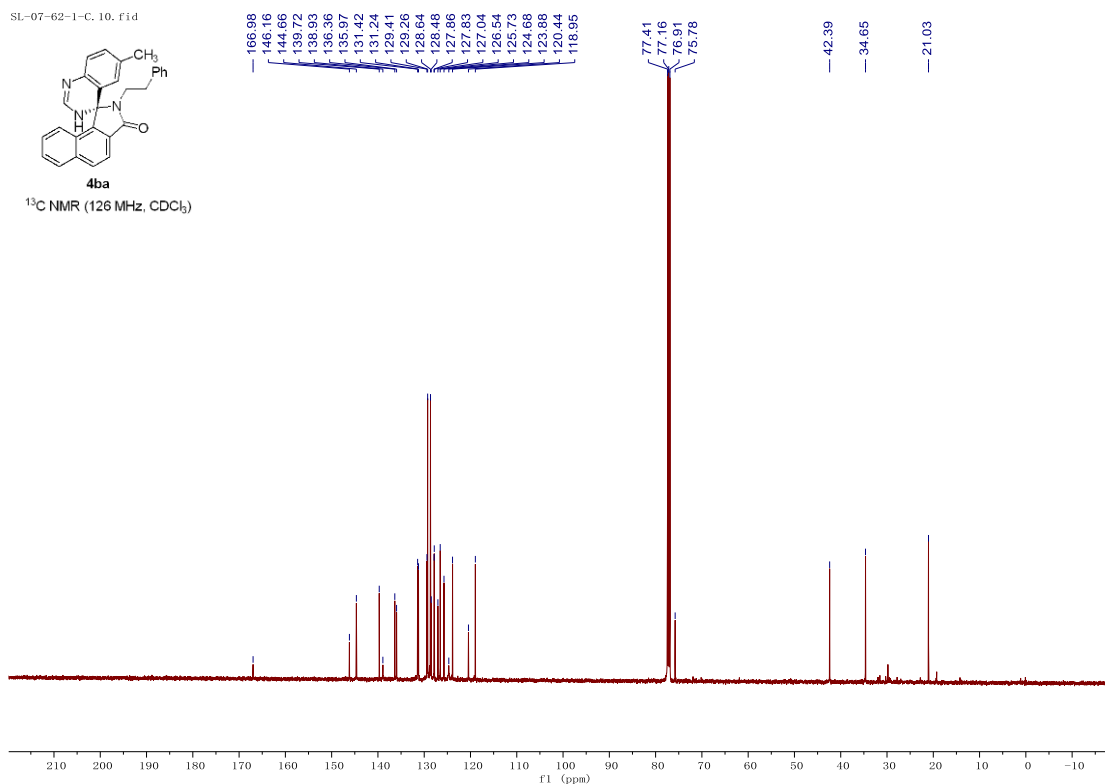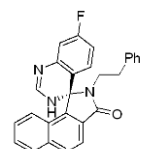

$^1\text{H}$  NMR (500 MHz,  $\text{CDCl}_3$ )

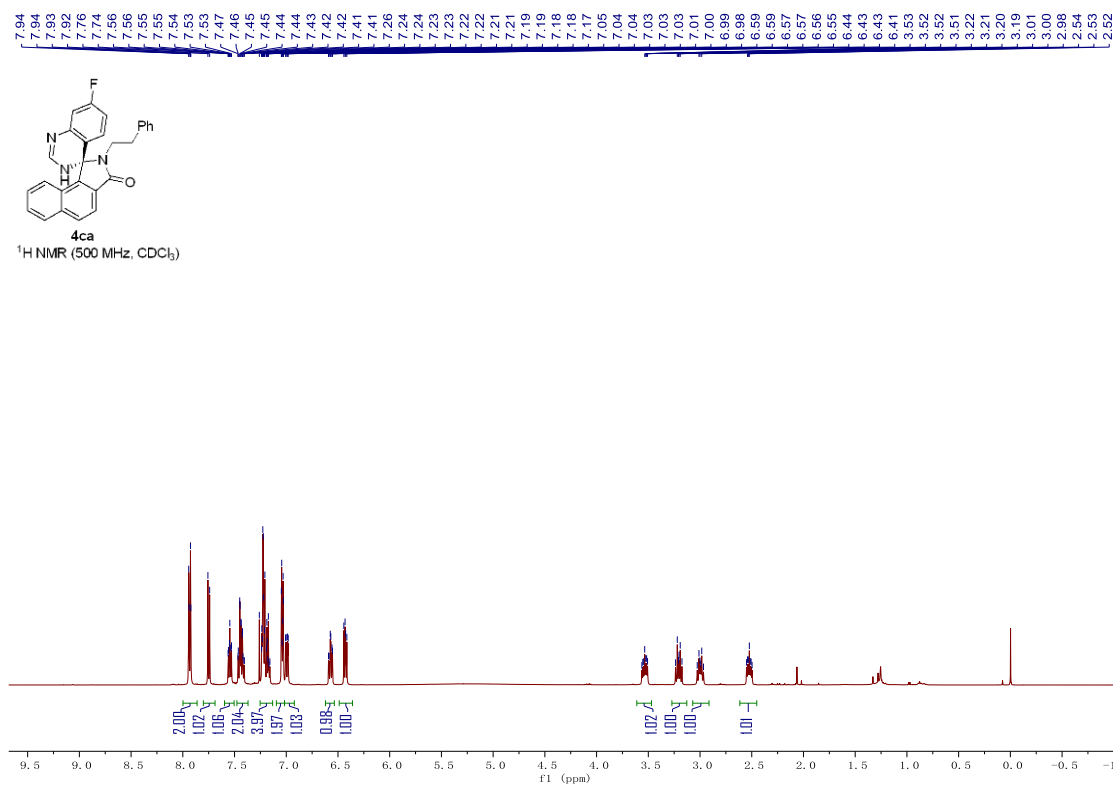

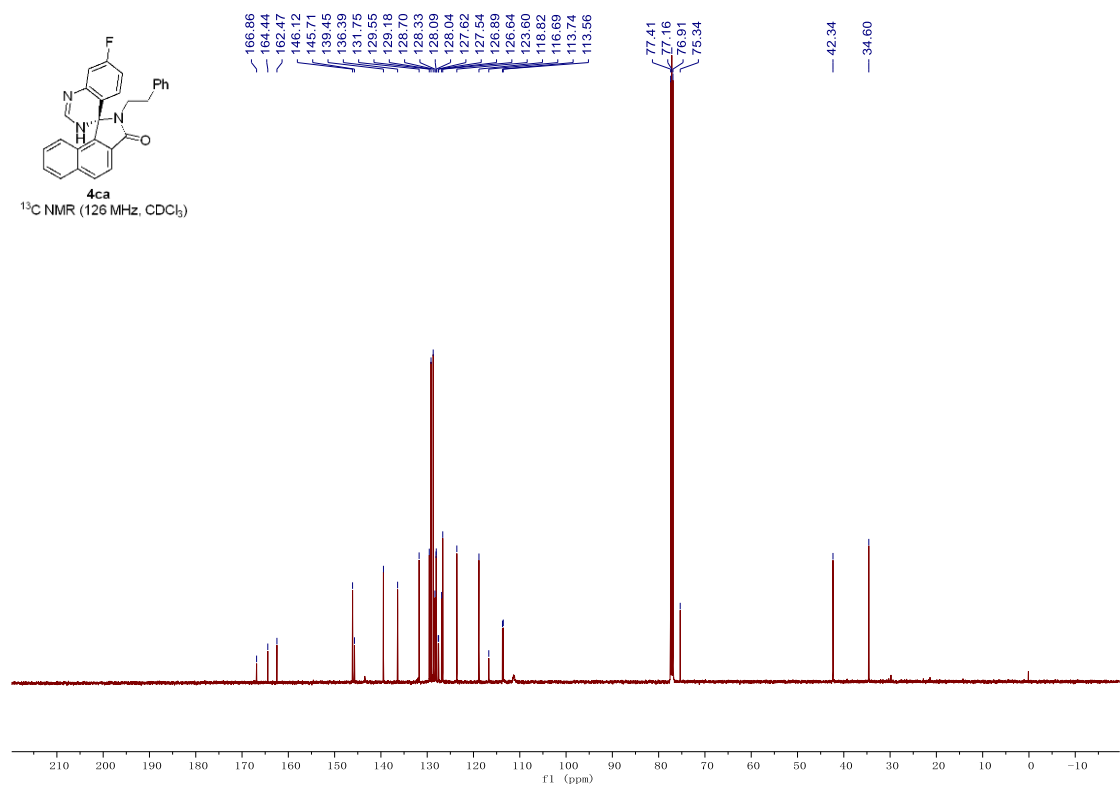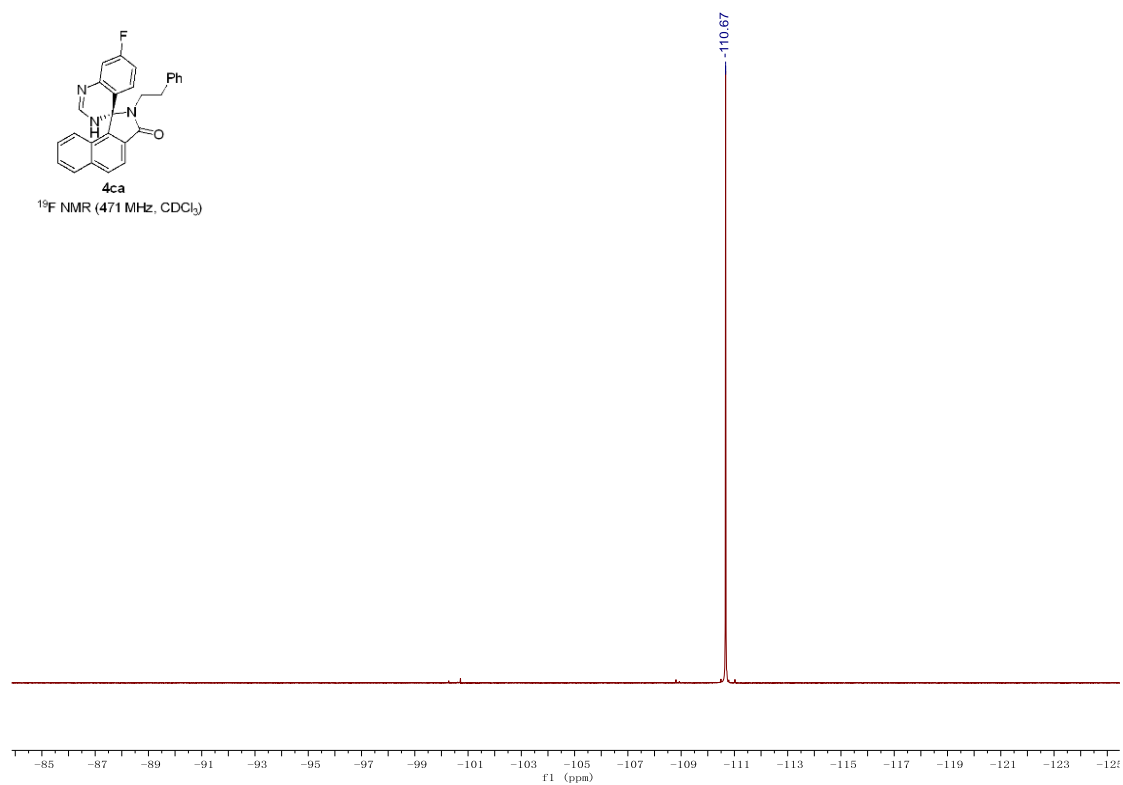

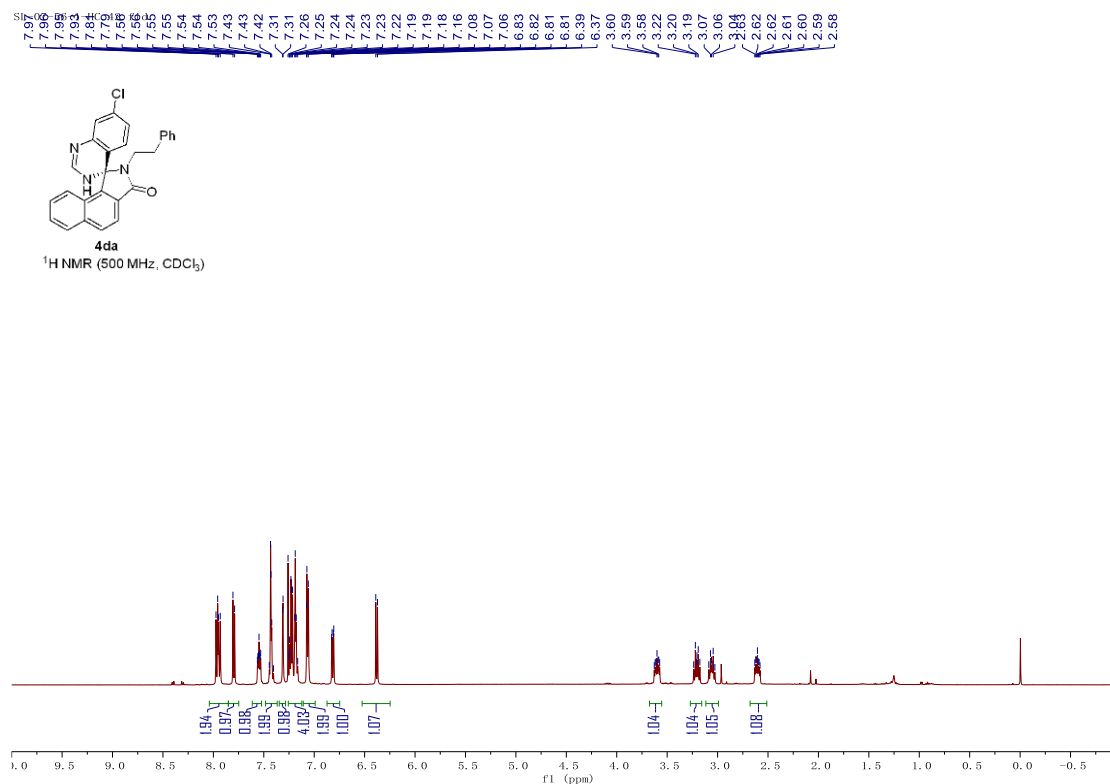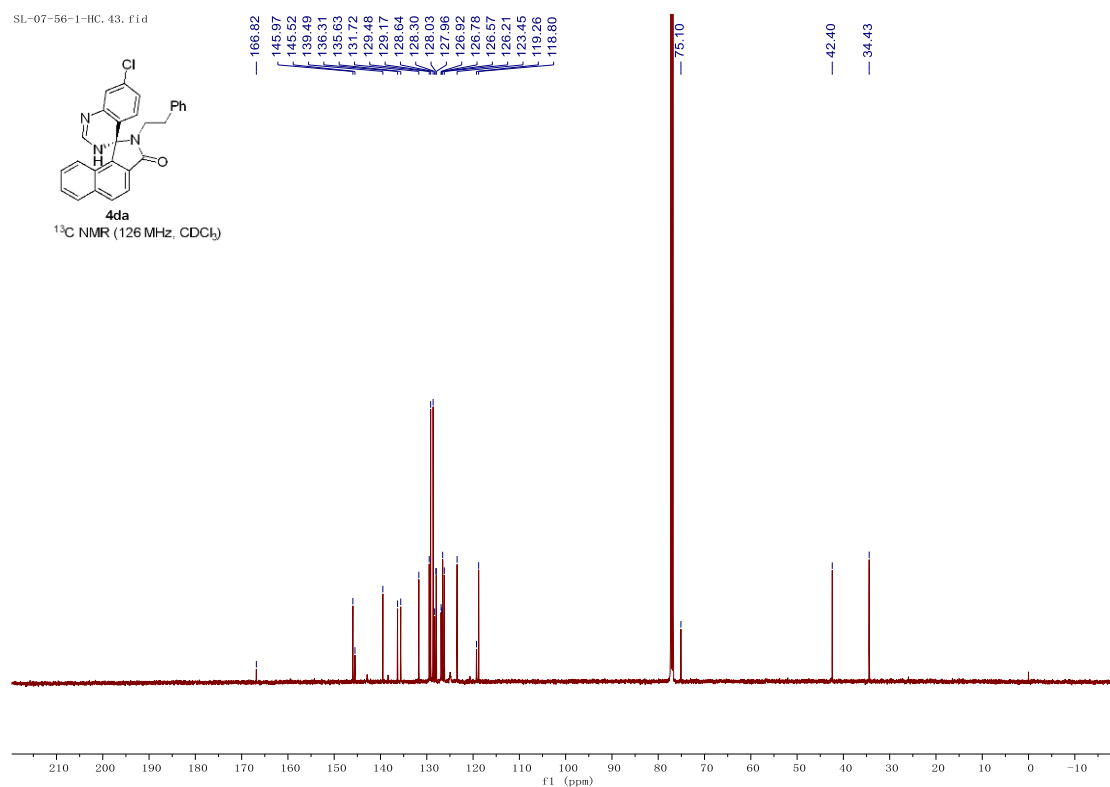



SL-09-163-6-HFC, 13, f1d

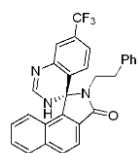

**3-4ea**  
<sup>19</sup>F NMR (471 MHz, CDCl<sub>3</sub>)

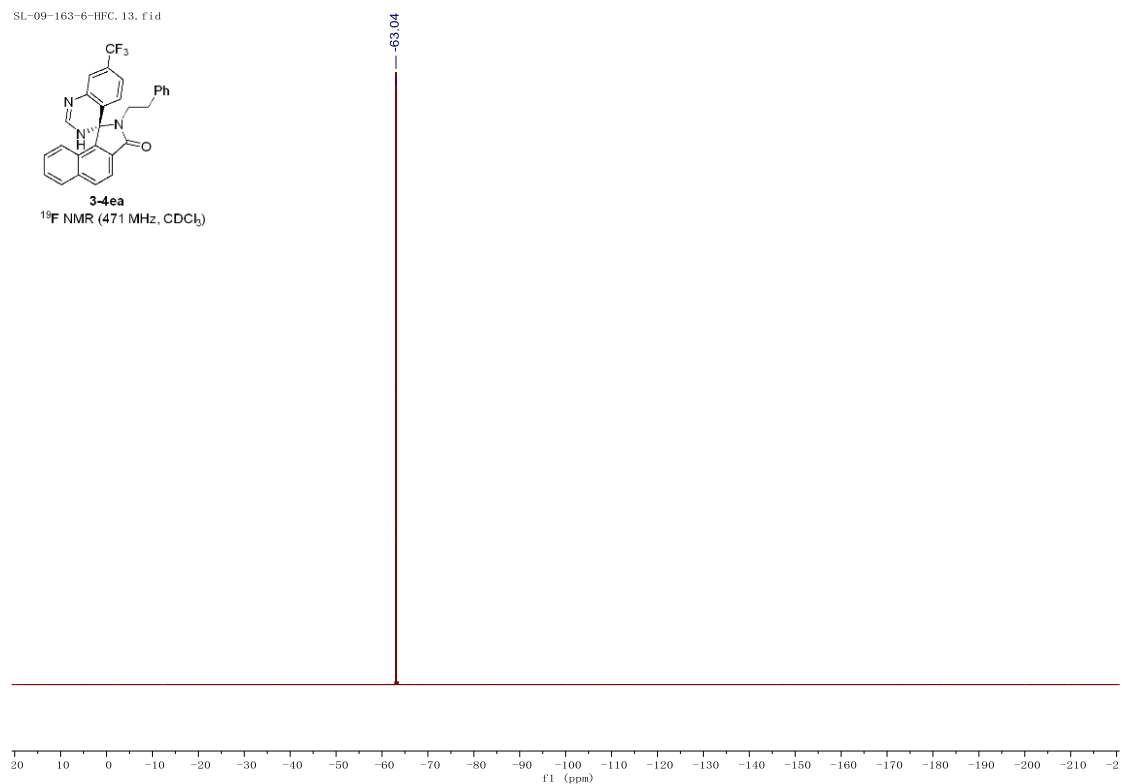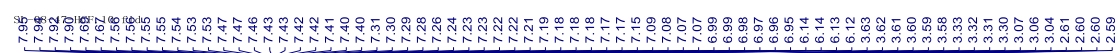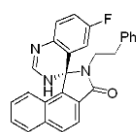

**4fa**  
<sup>1</sup>H NMR (500 MHz, CDCl<sub>3</sub>)

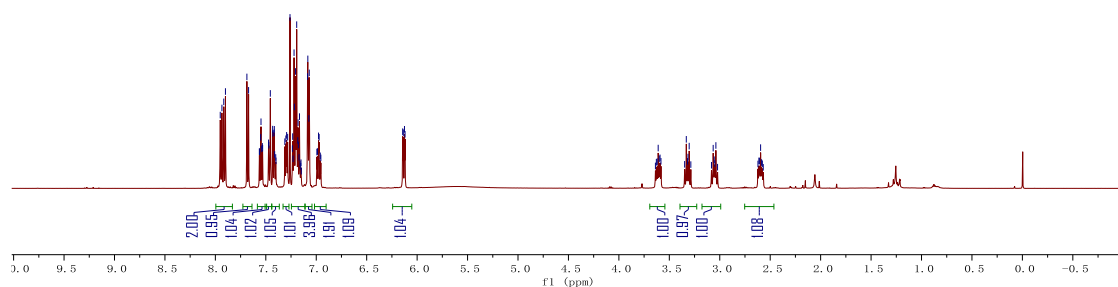

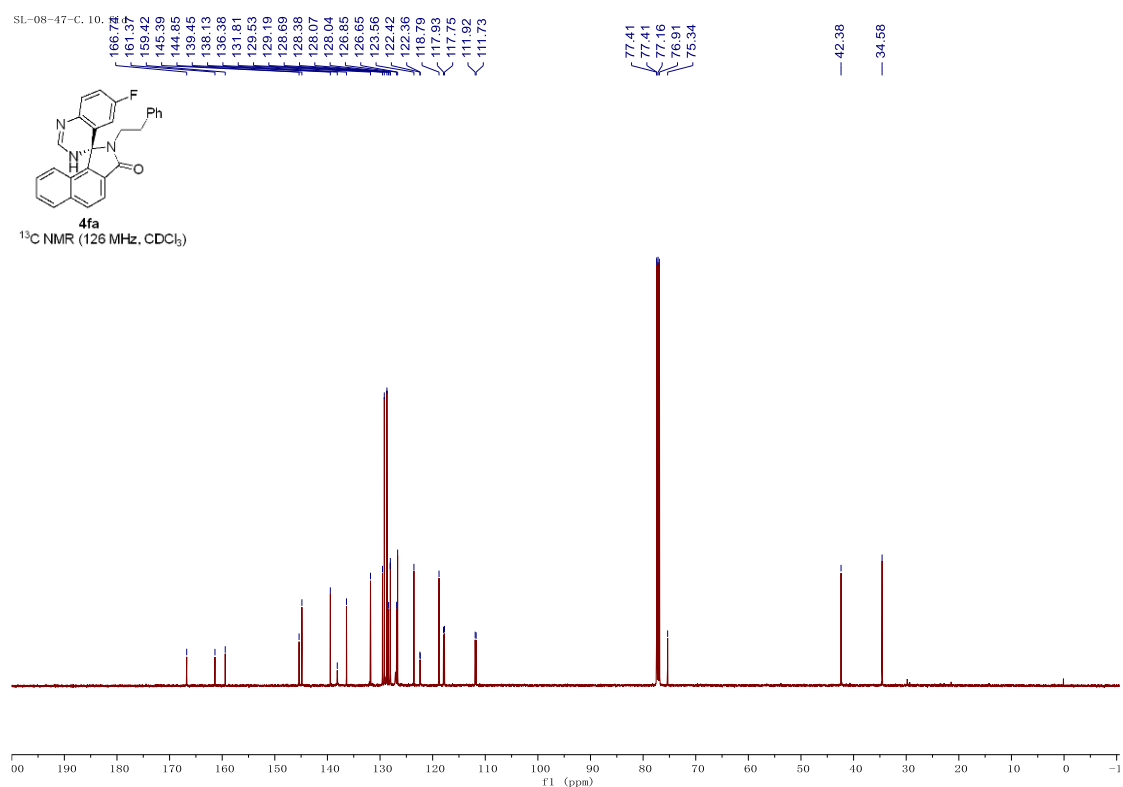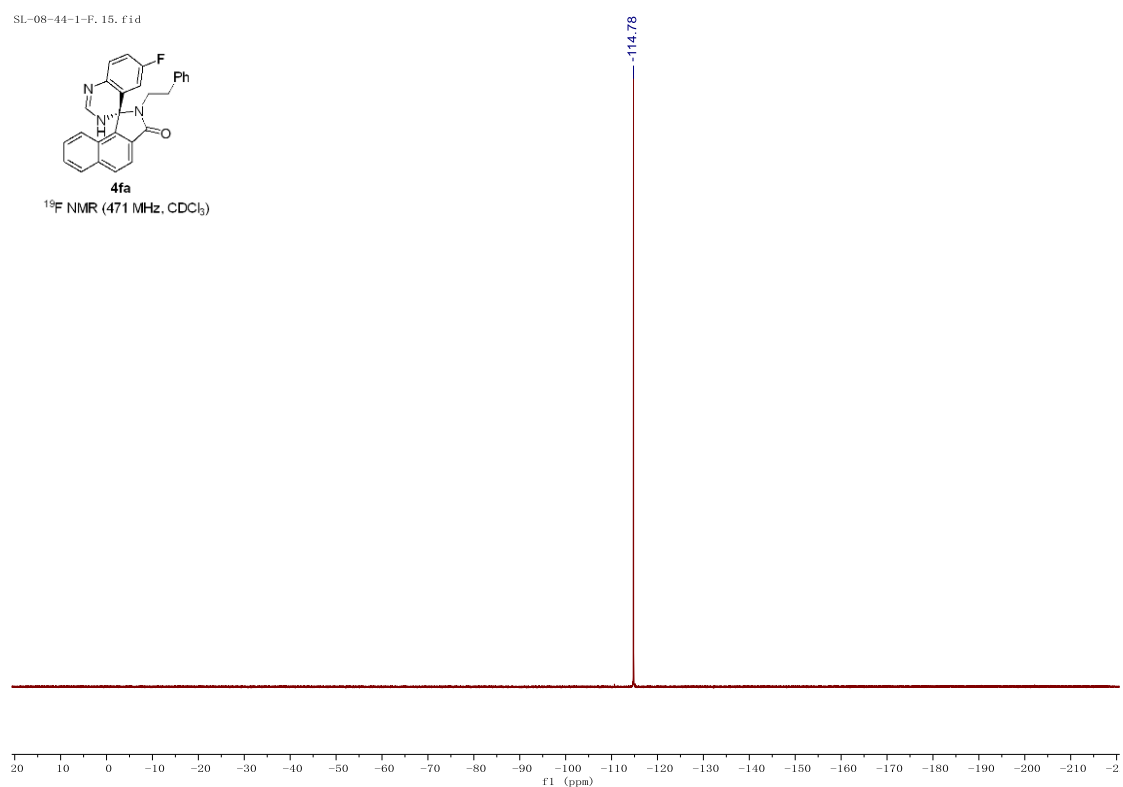



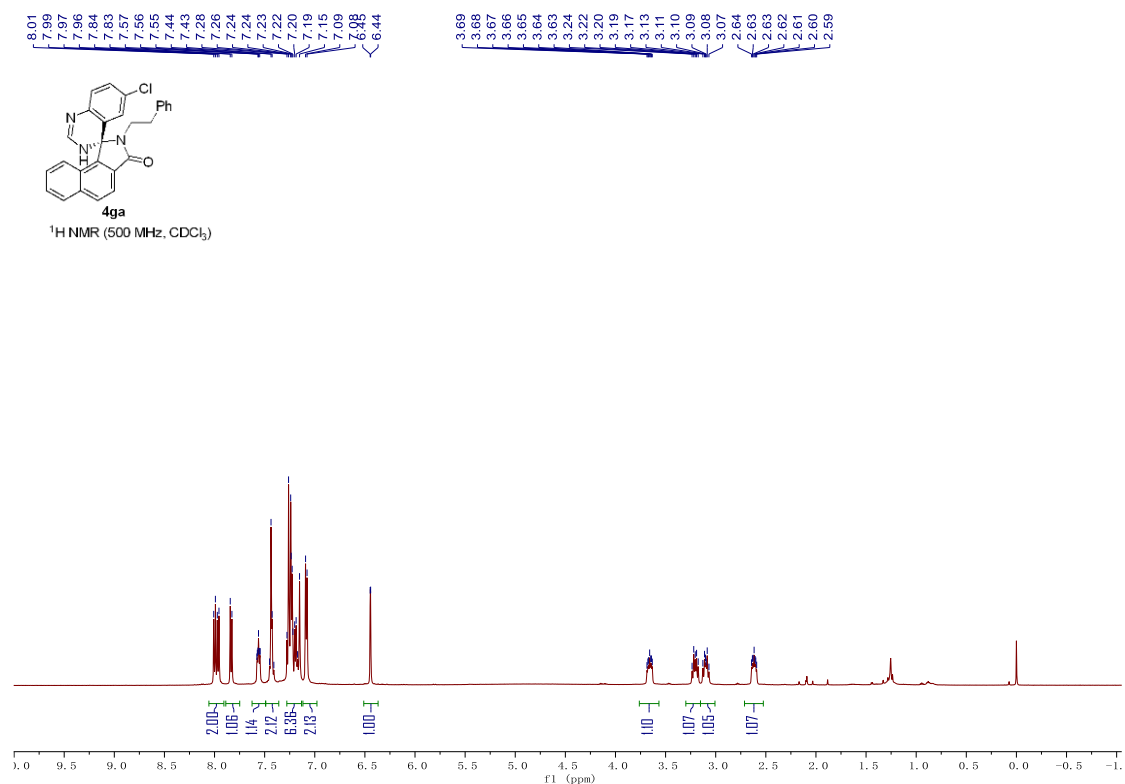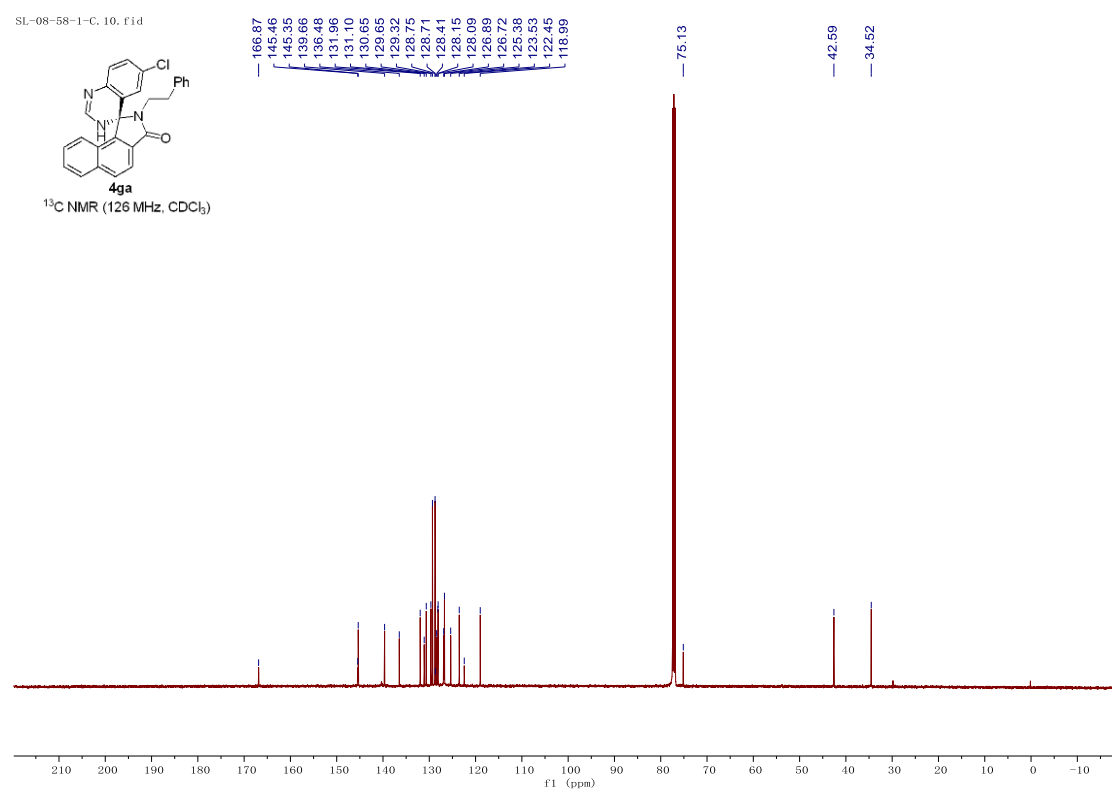

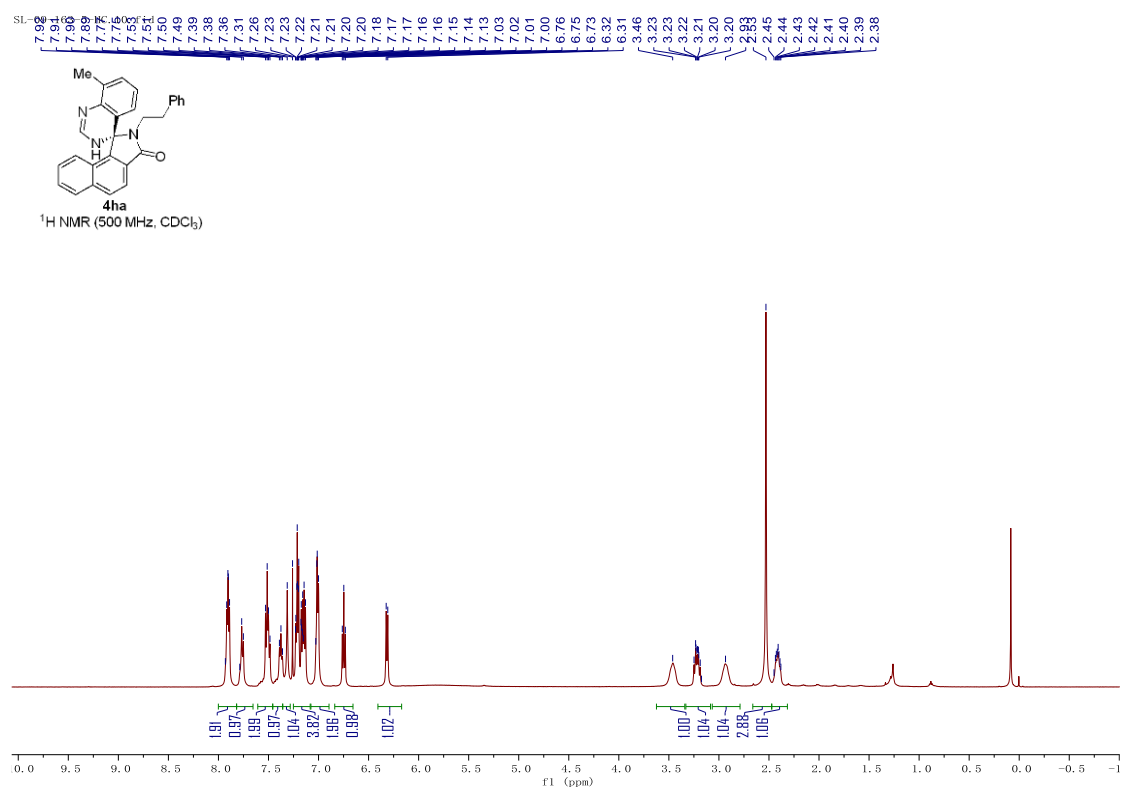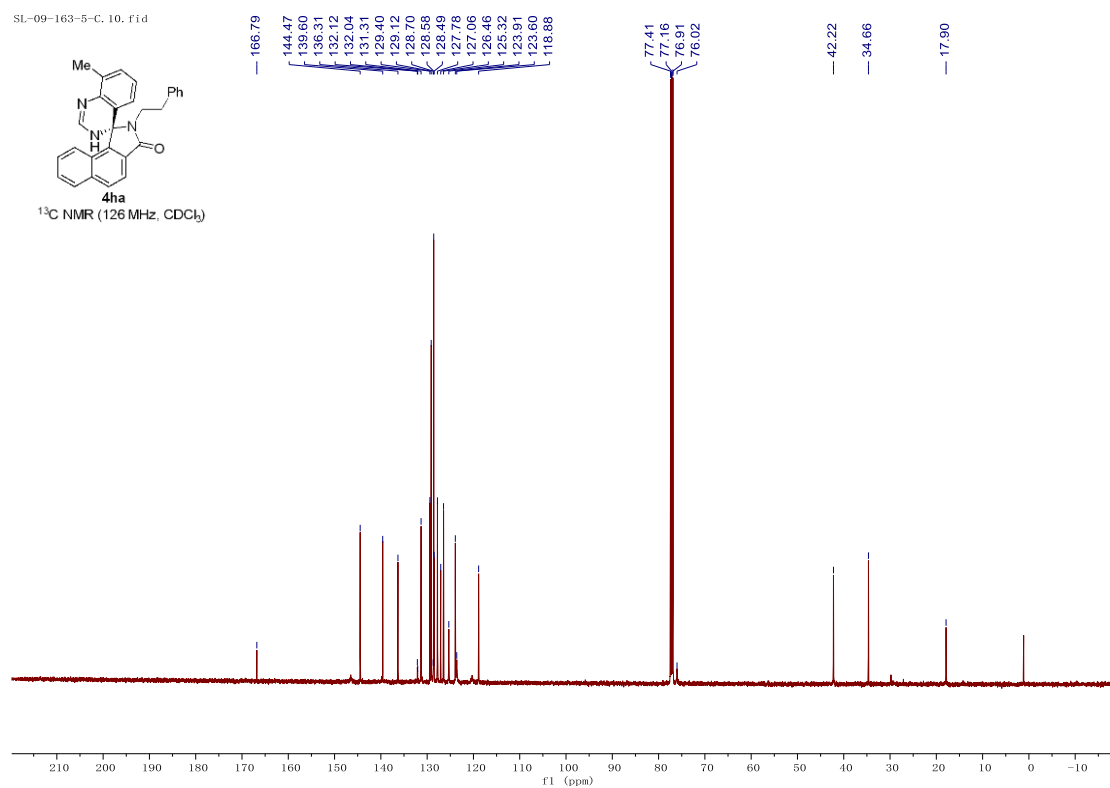

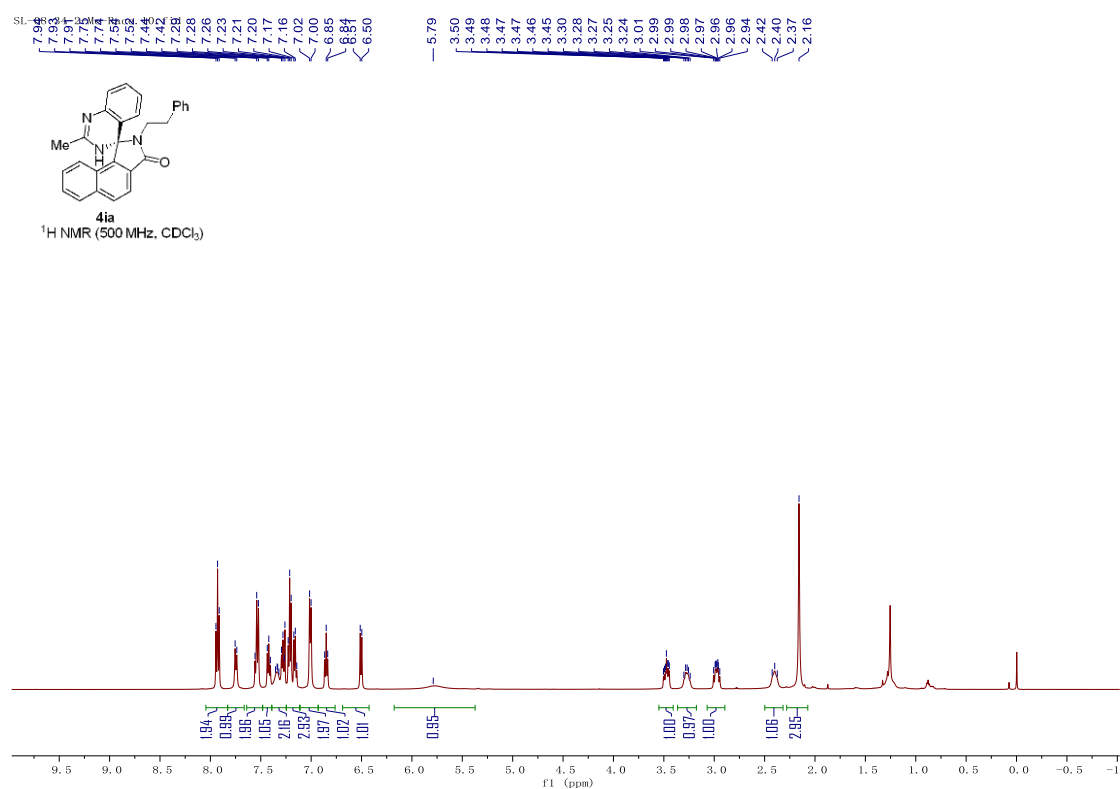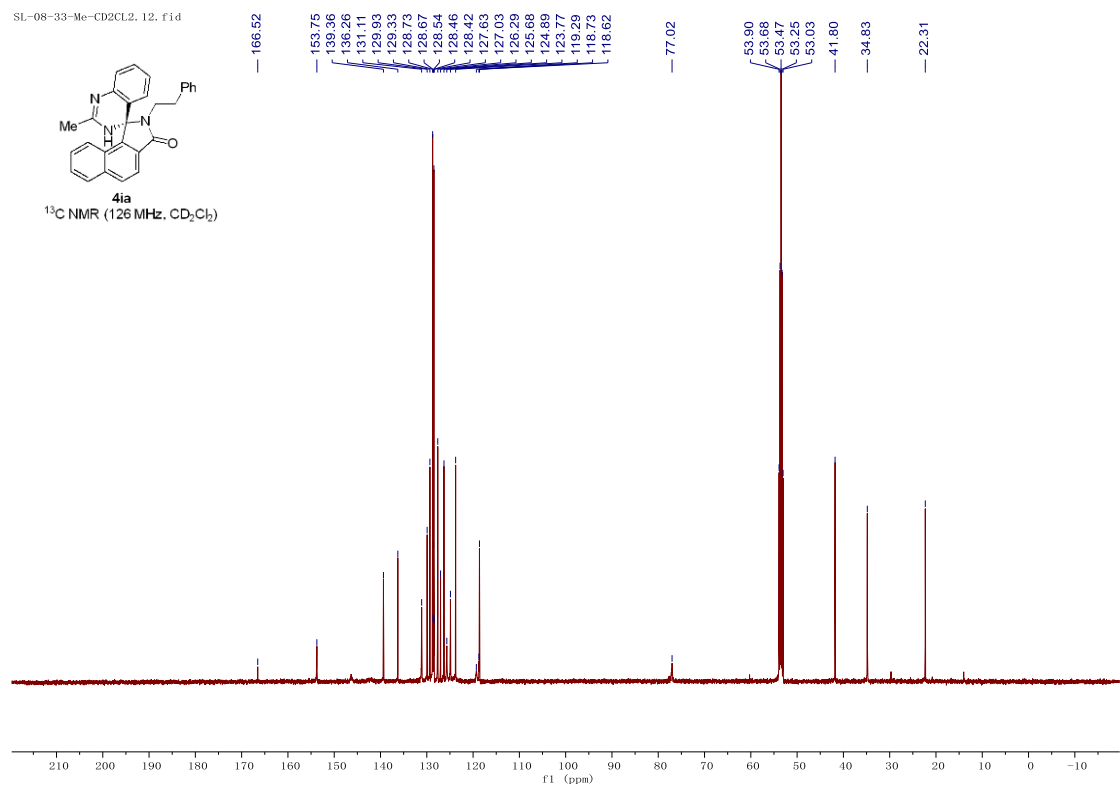

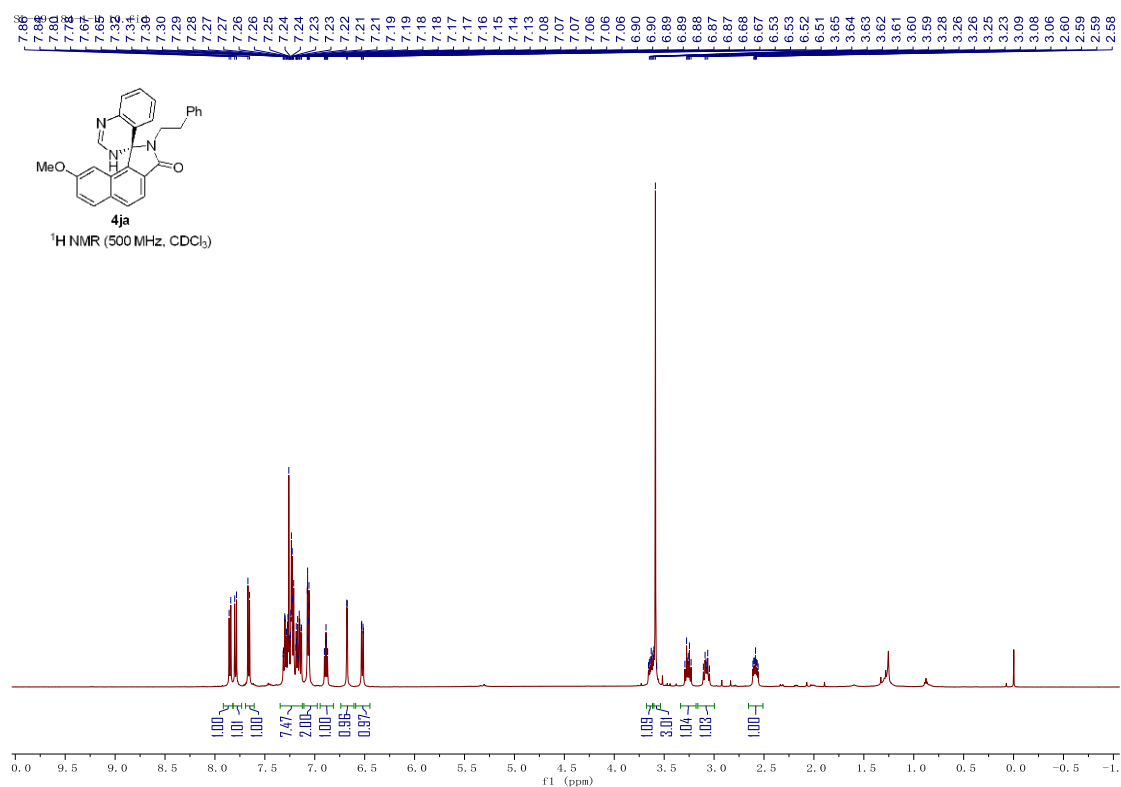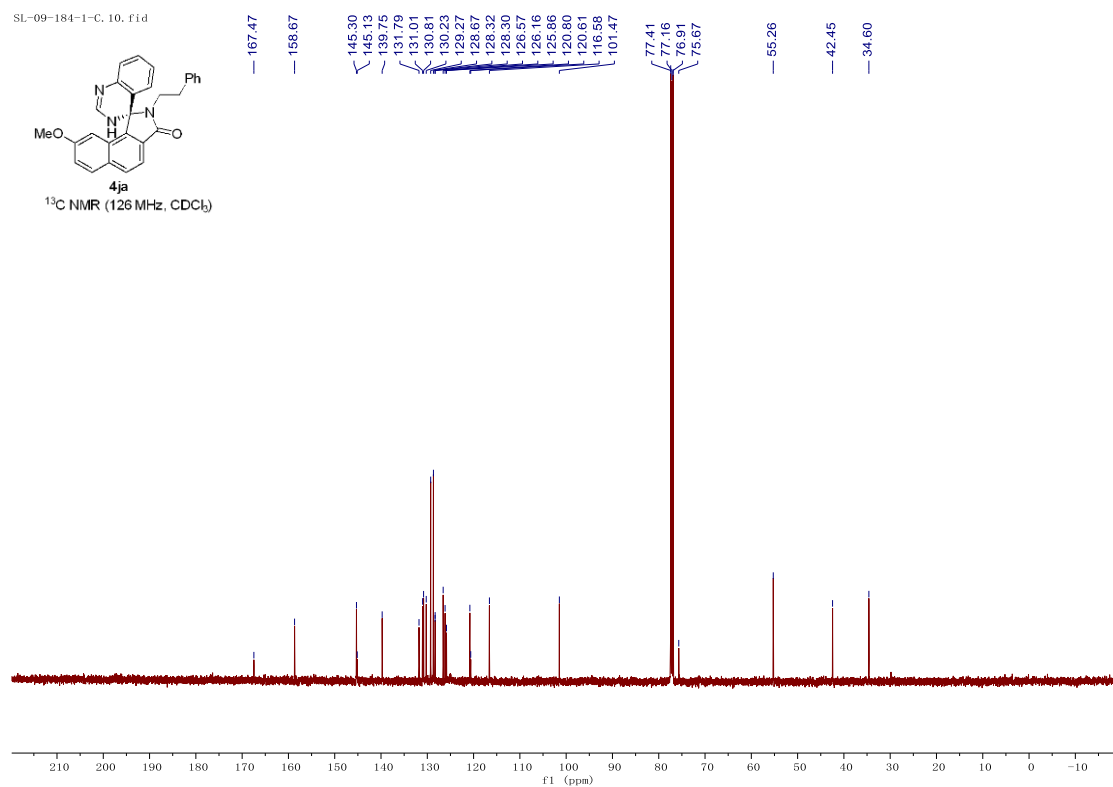

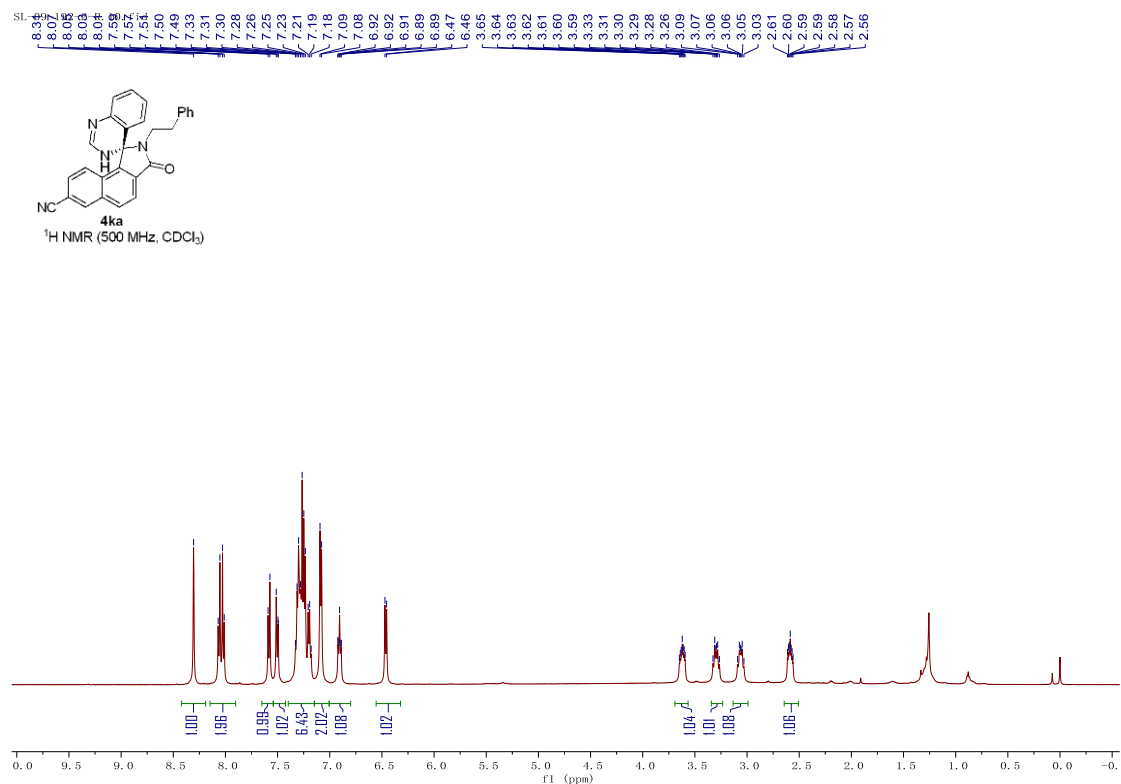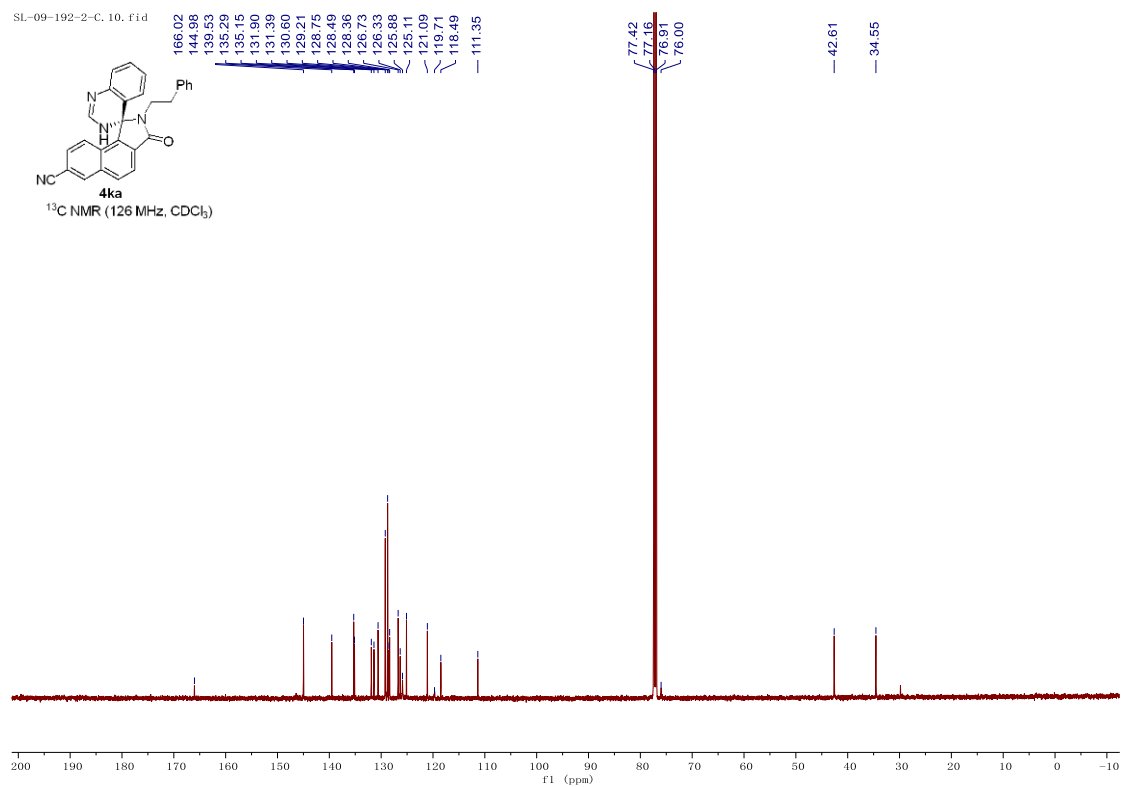

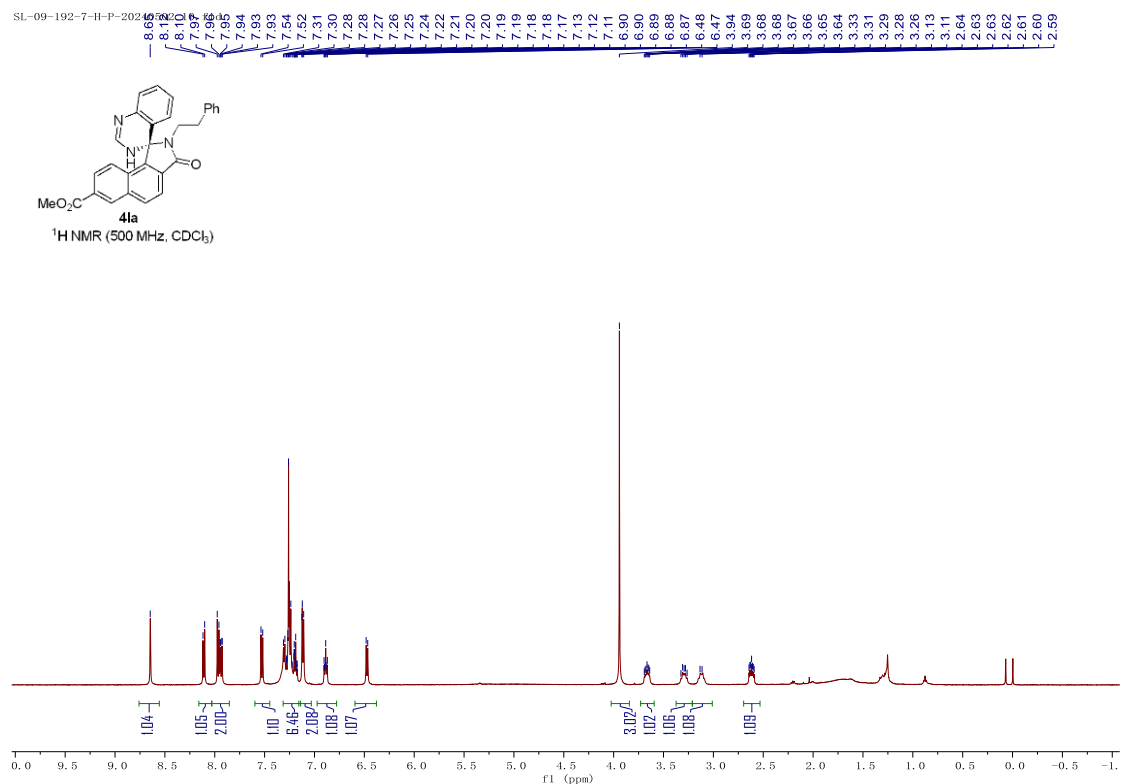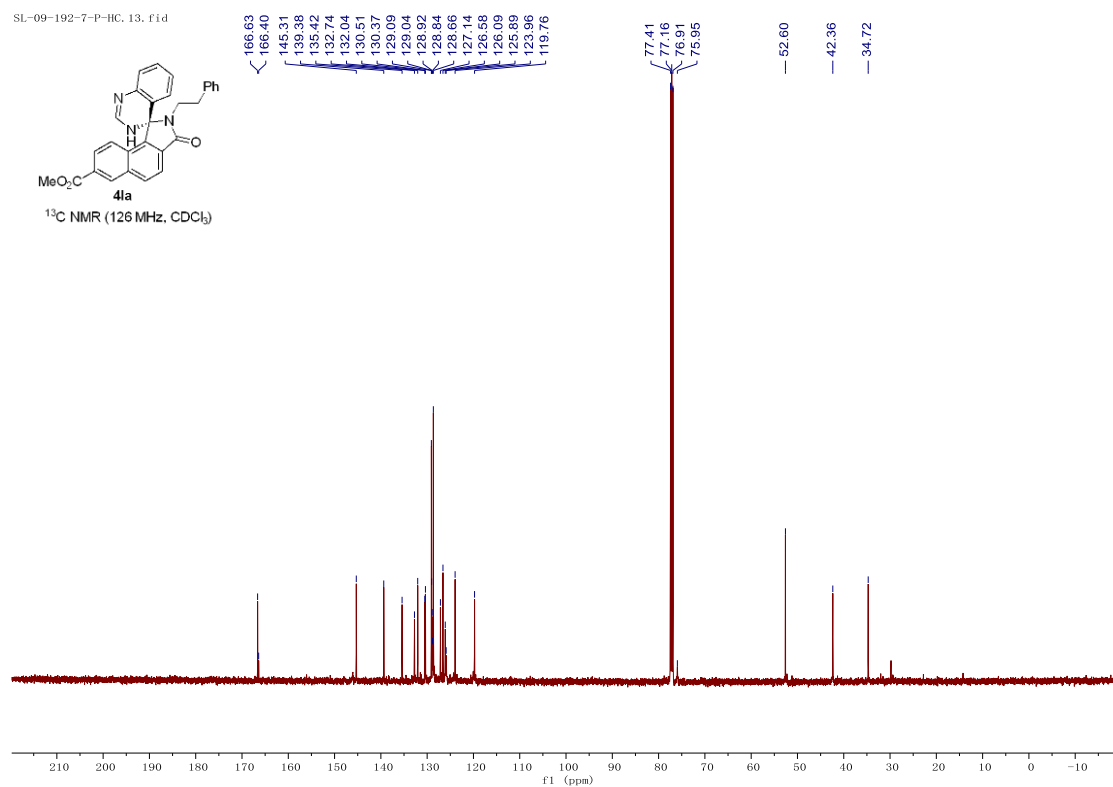

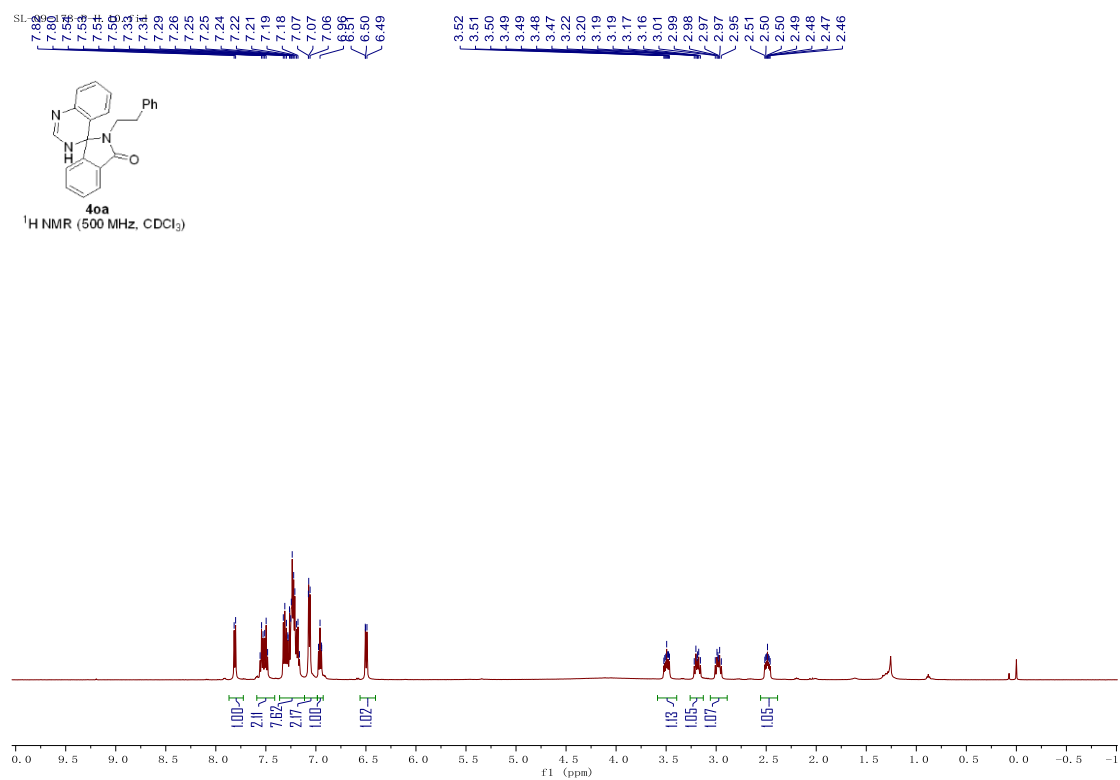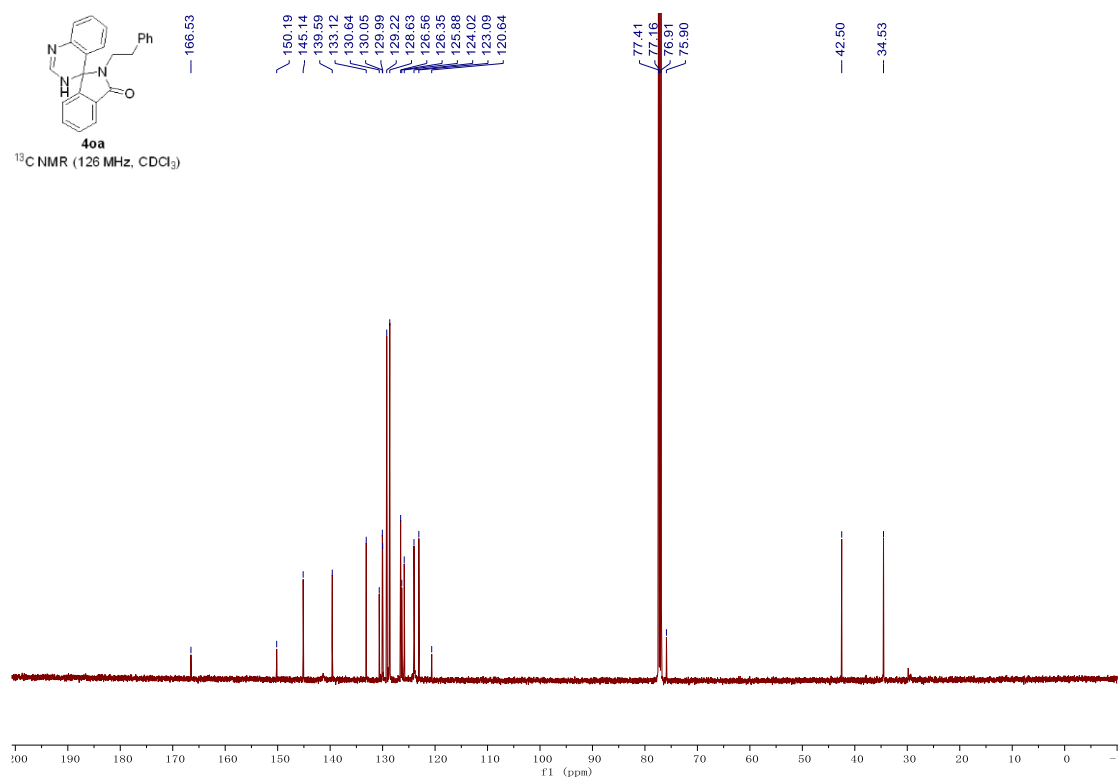

SL-09-179-1-P-HC, 10, f1d

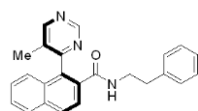

**4pa**

$^1\text{H}$  NMR (500 MHz,  $\text{CDCl}_3$ )

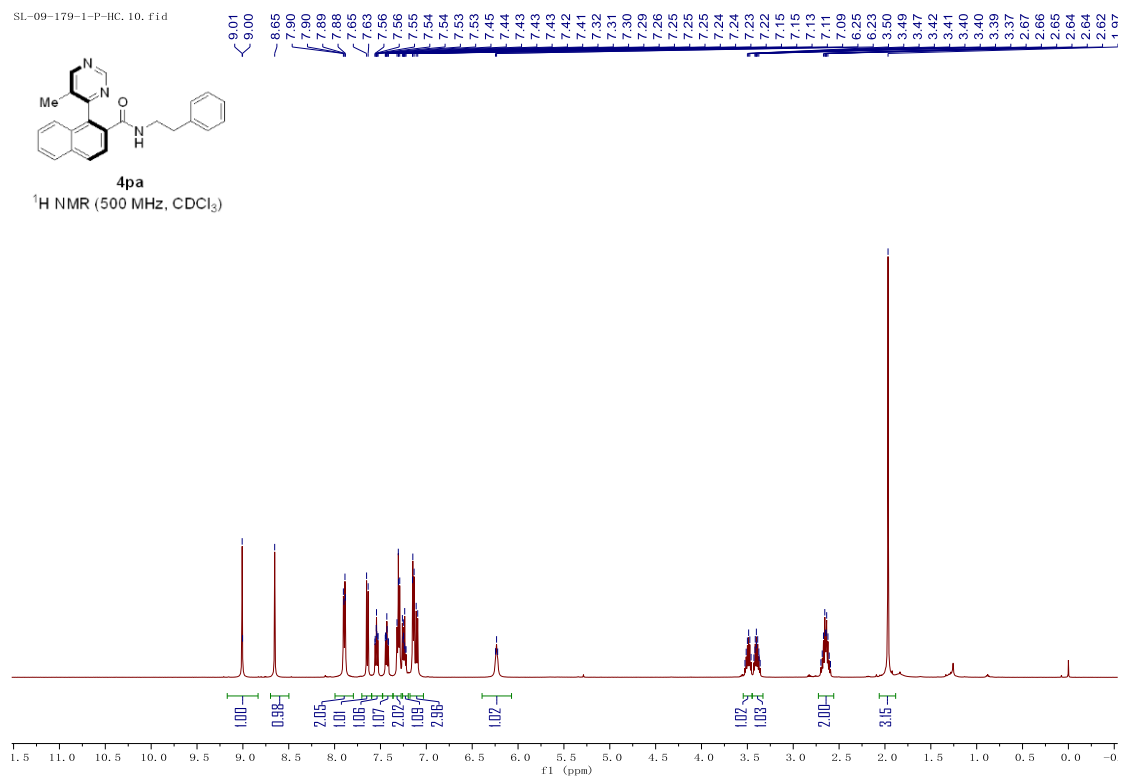

SL-09-179-1-P-HC, 11, f1d

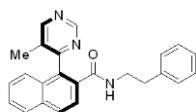

**4pa**

$^{13}\text{C}$  NMR (125 MHz,  $\text{CDCl}_3$ )

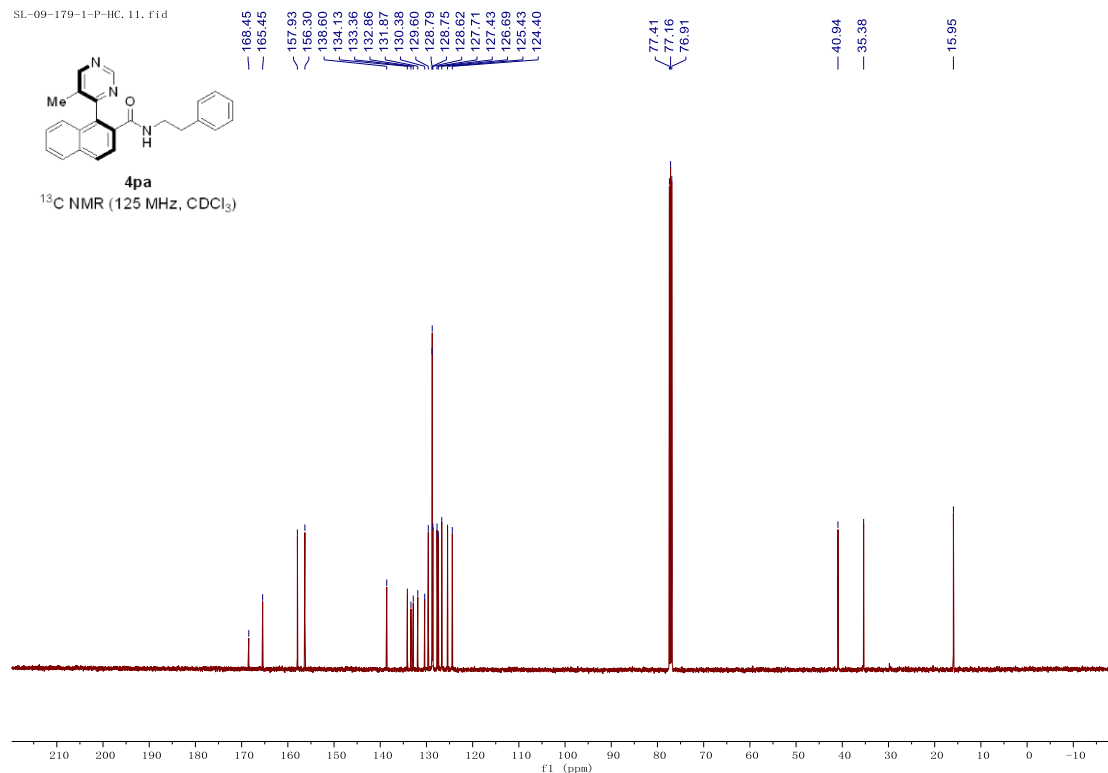



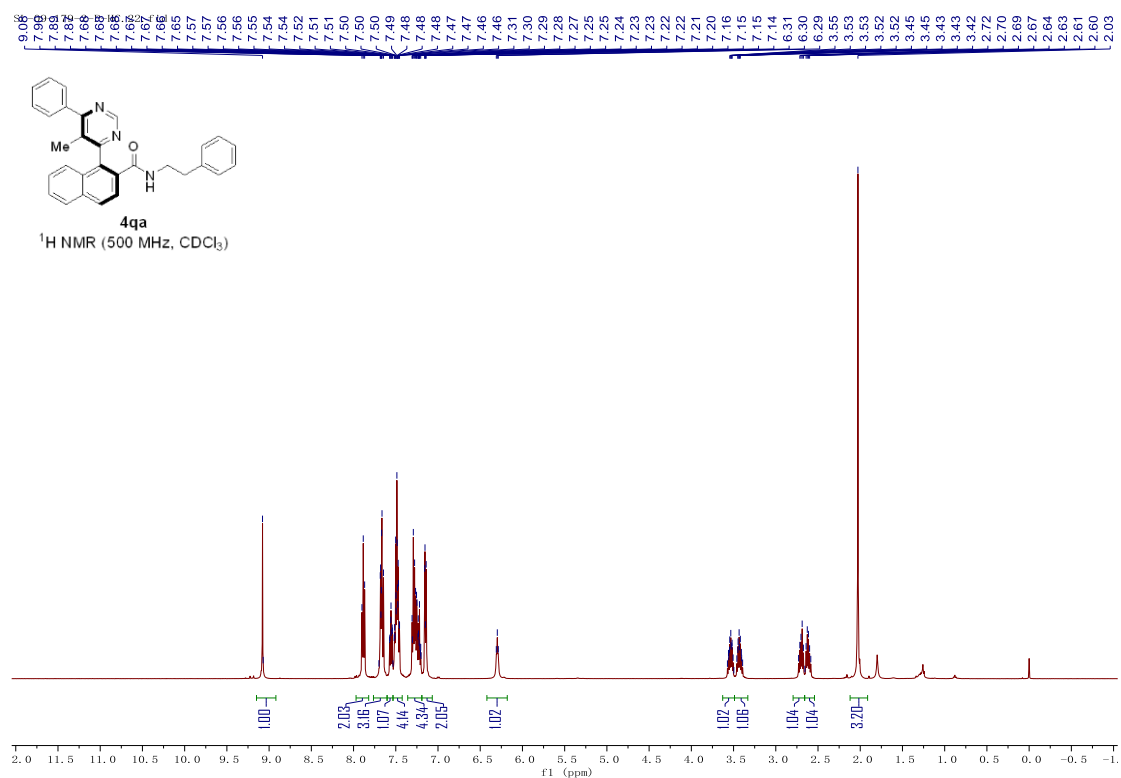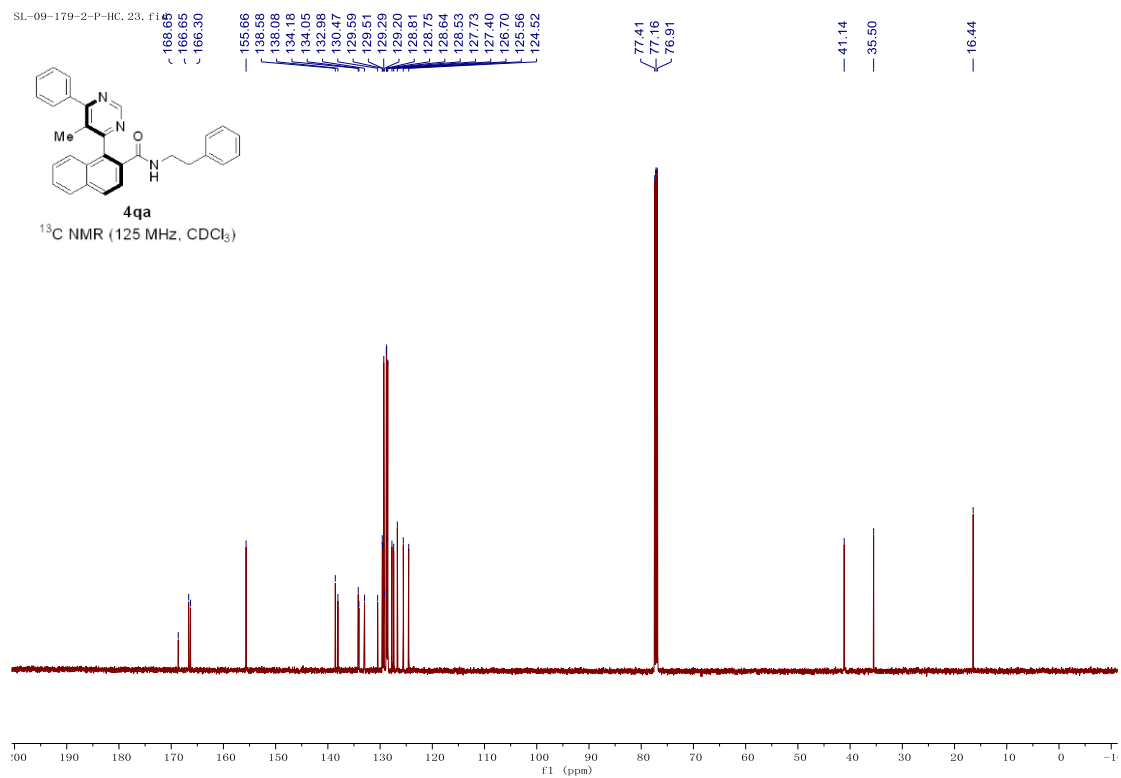

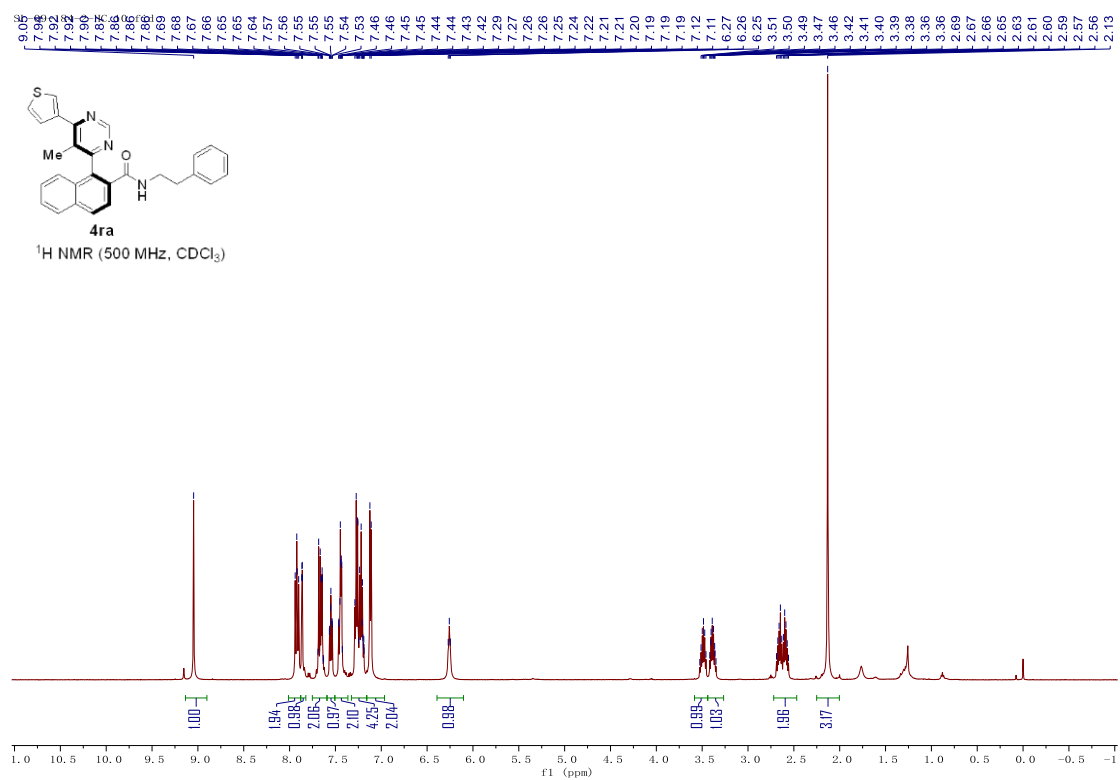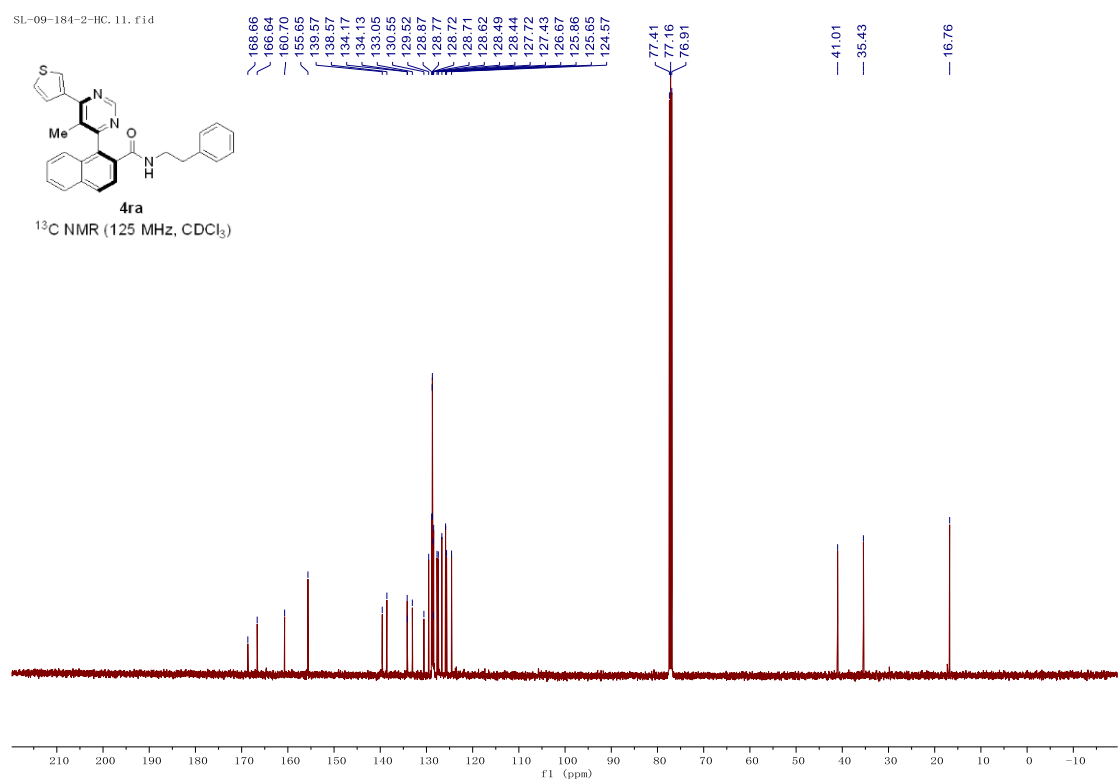

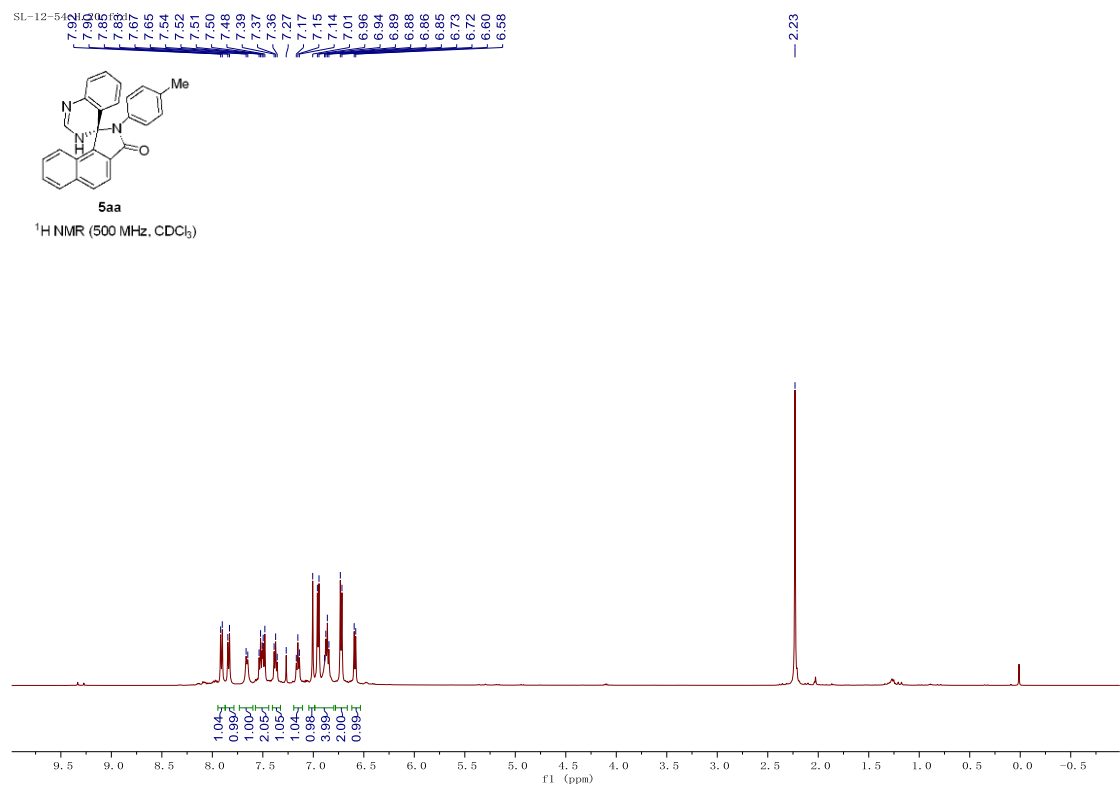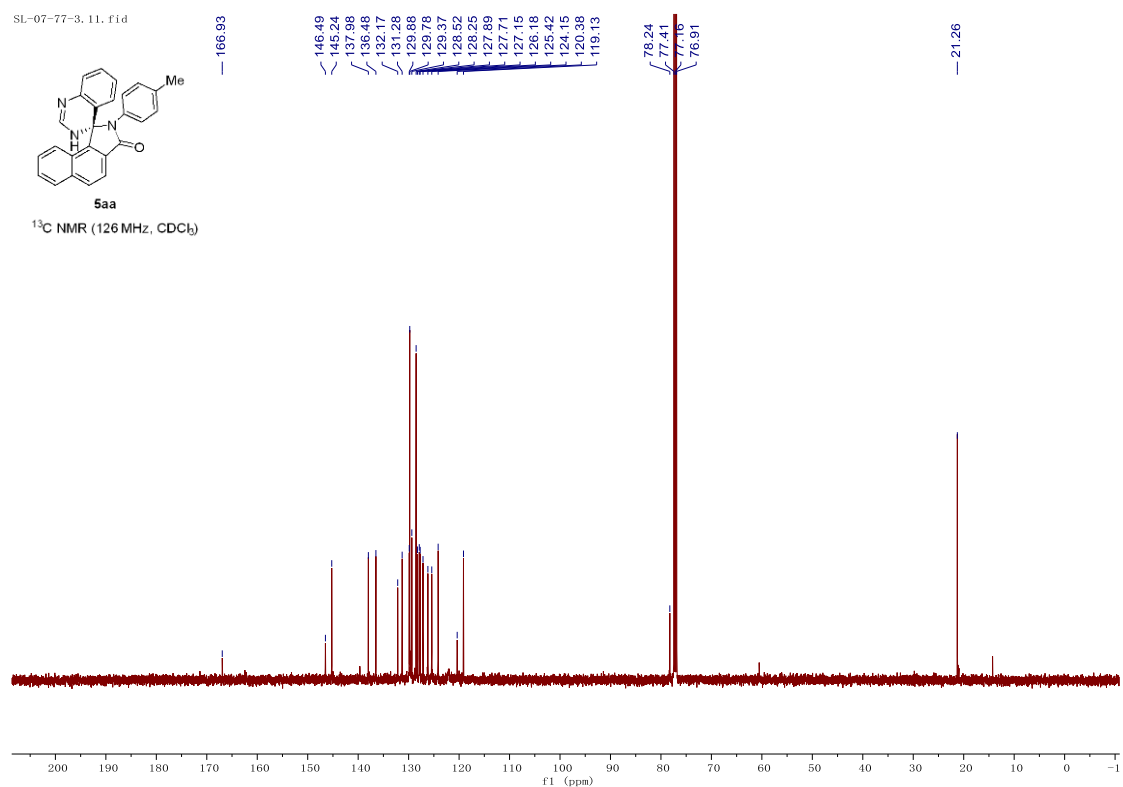

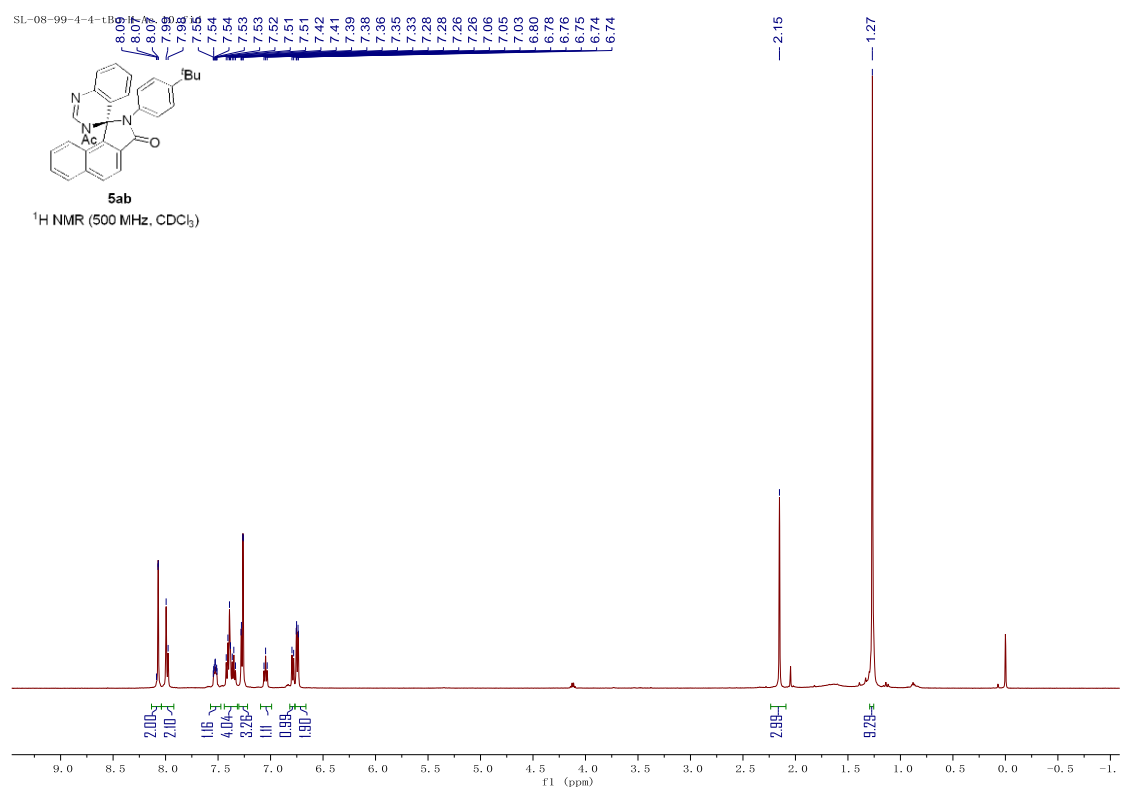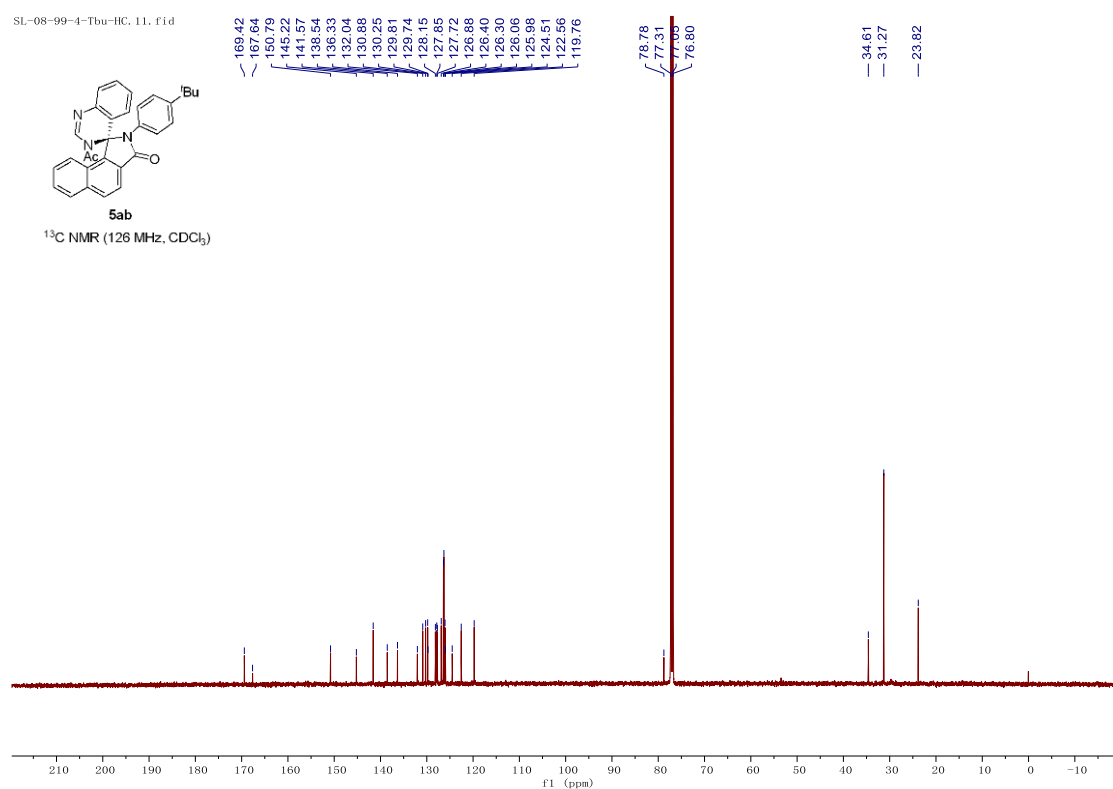

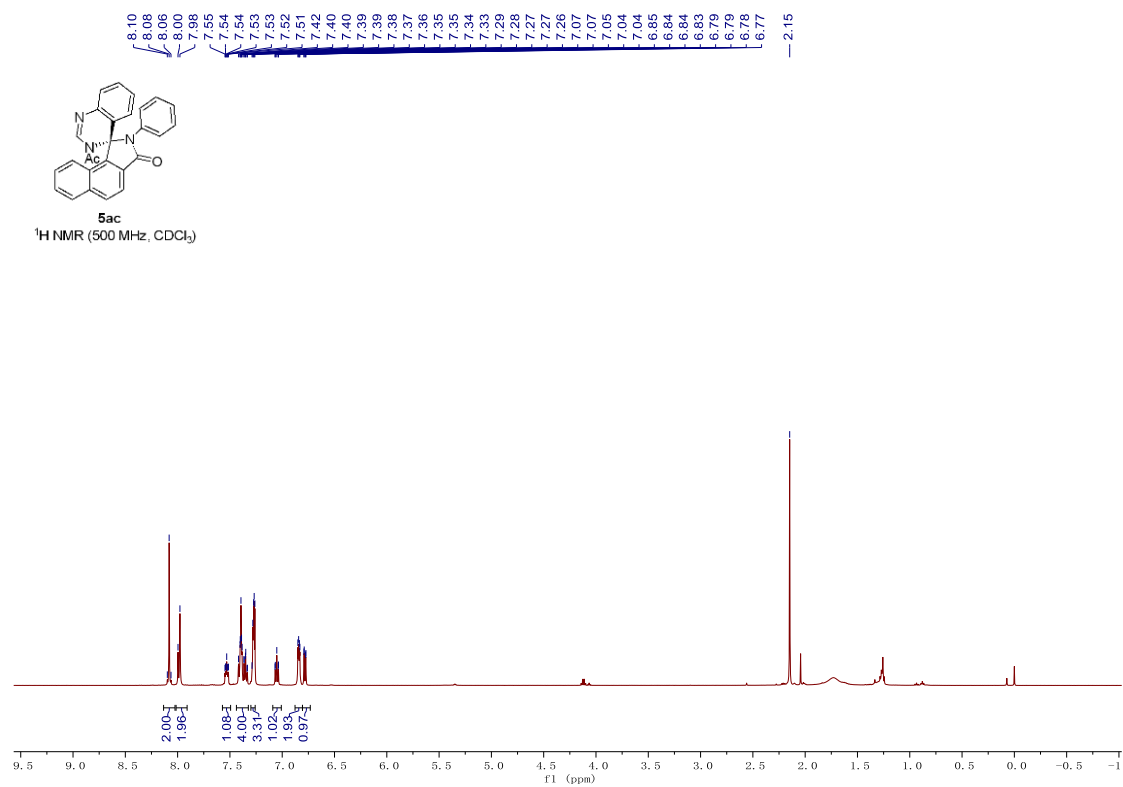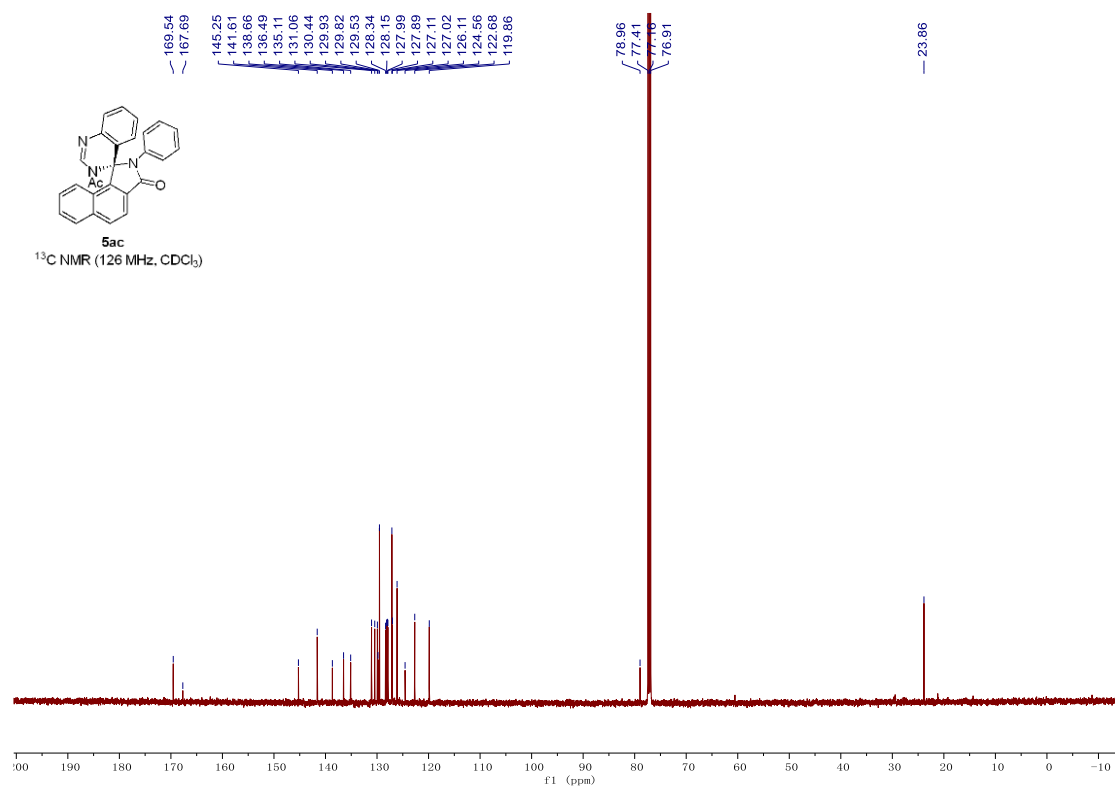

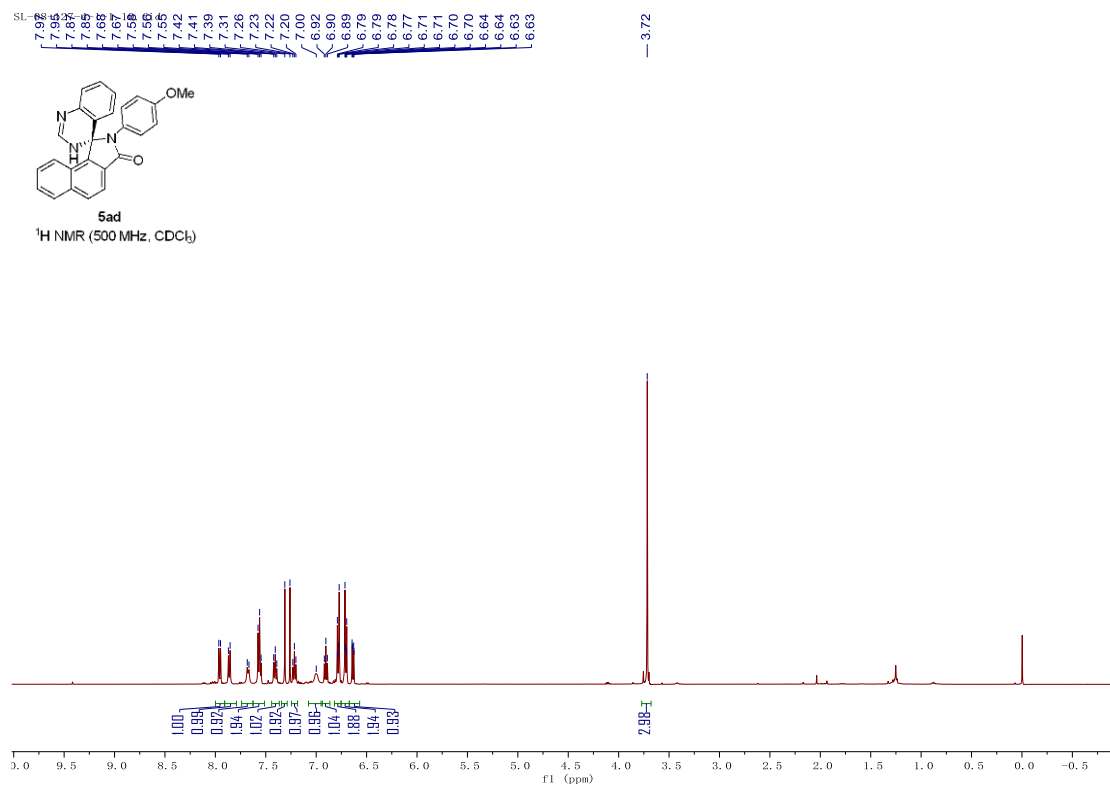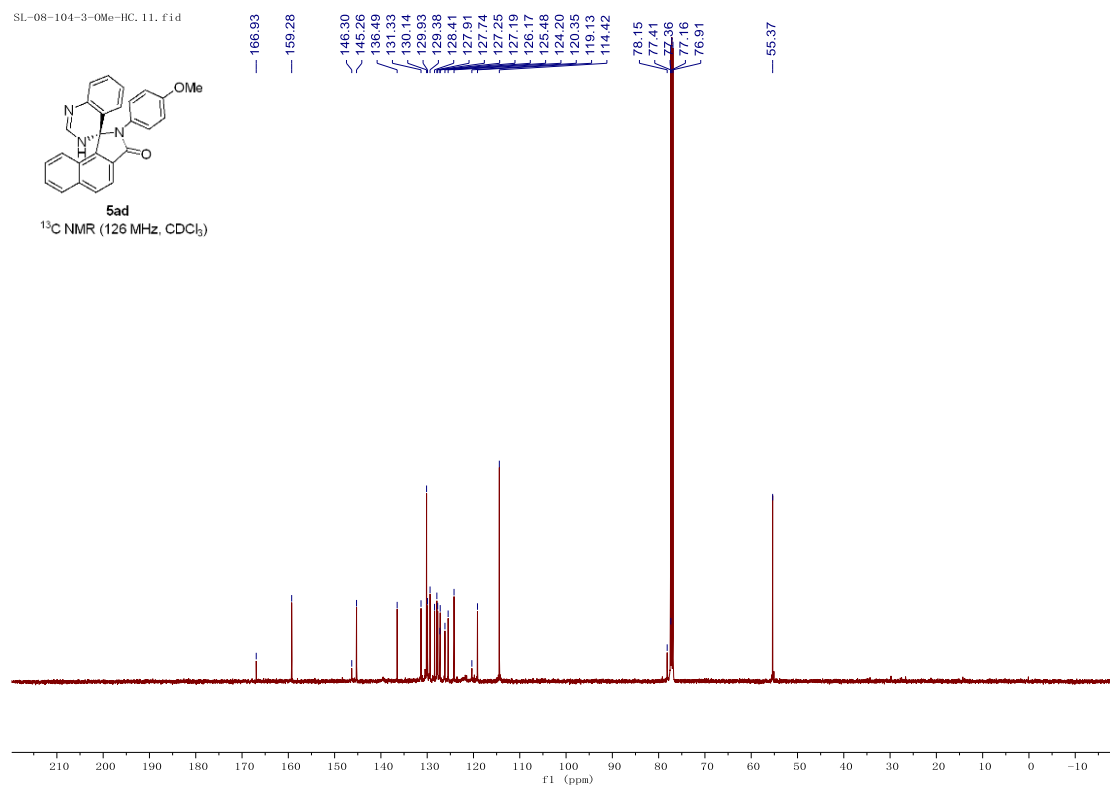

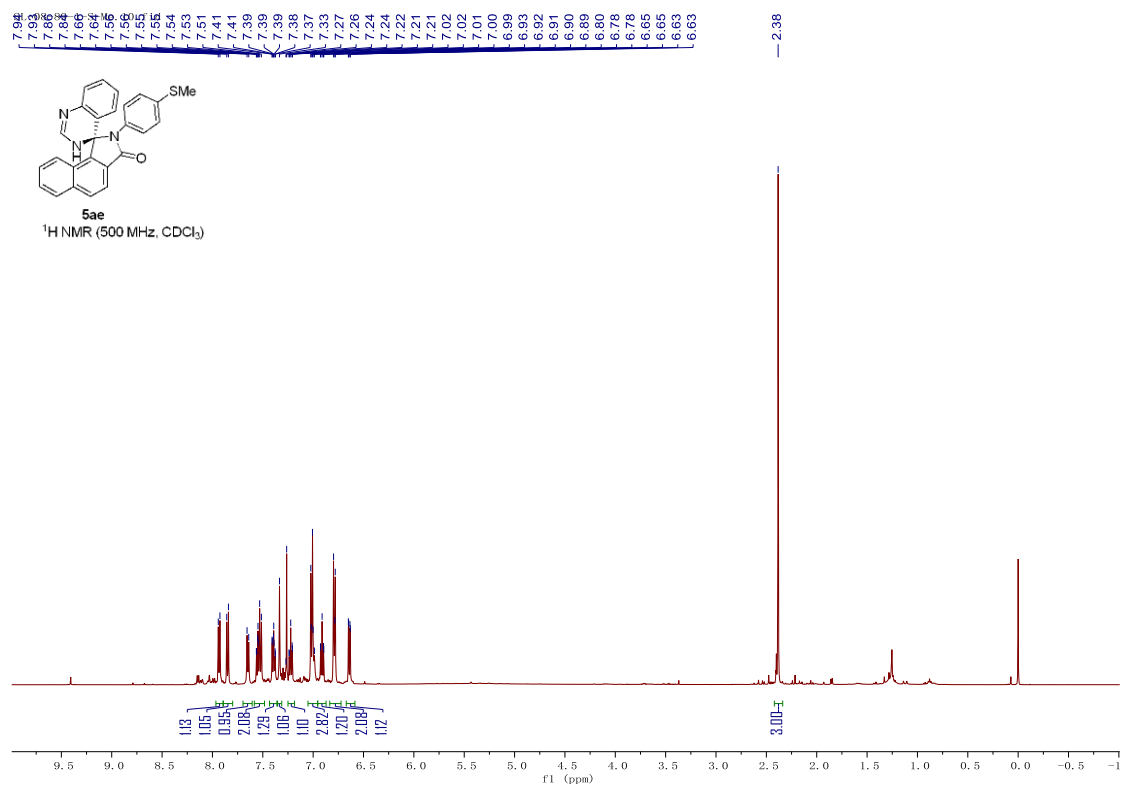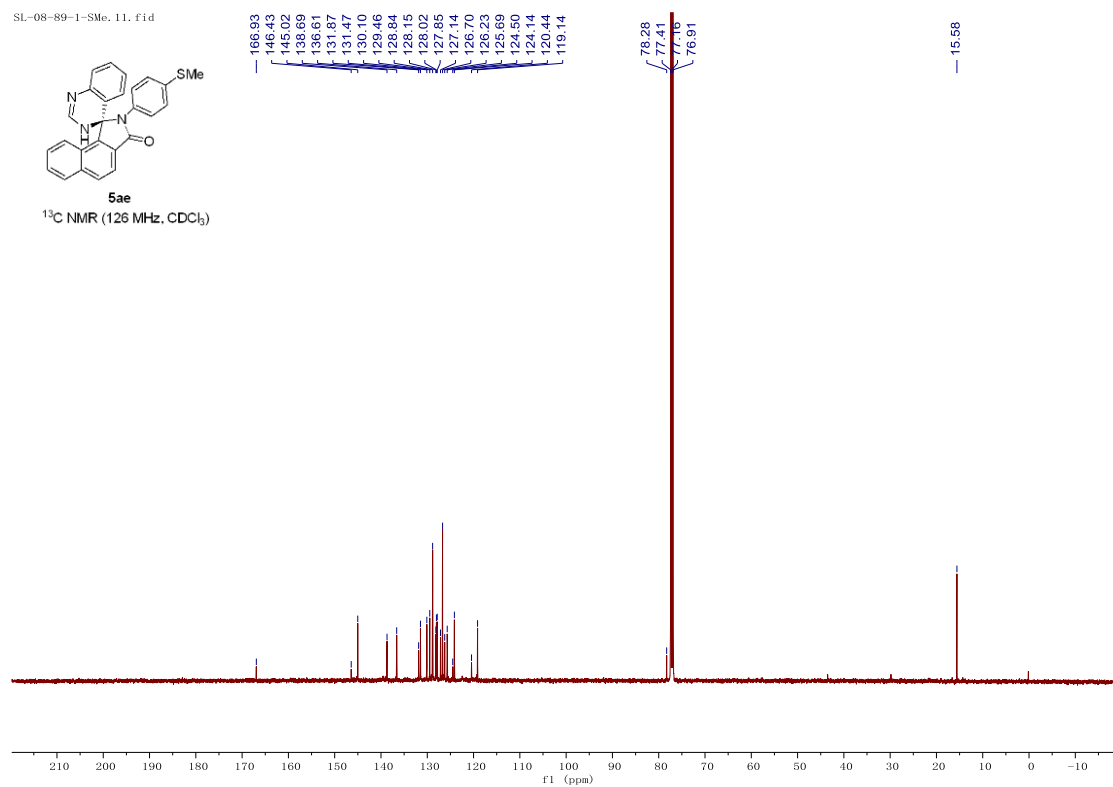

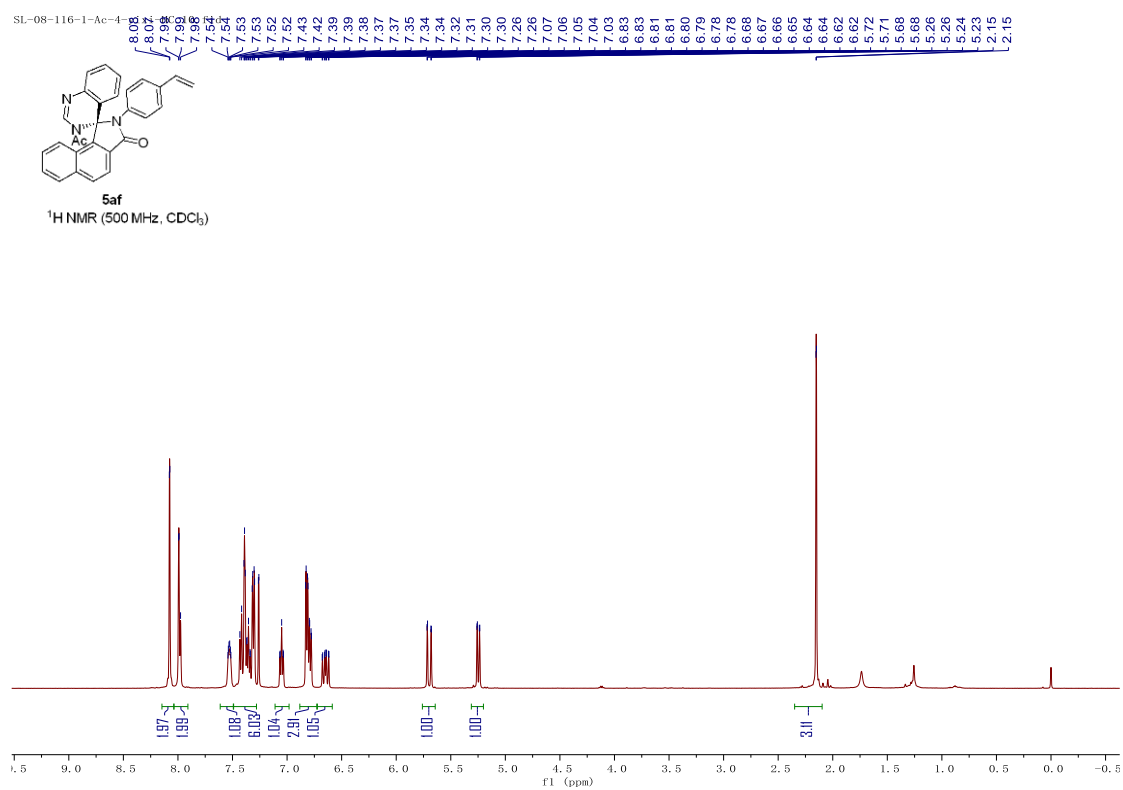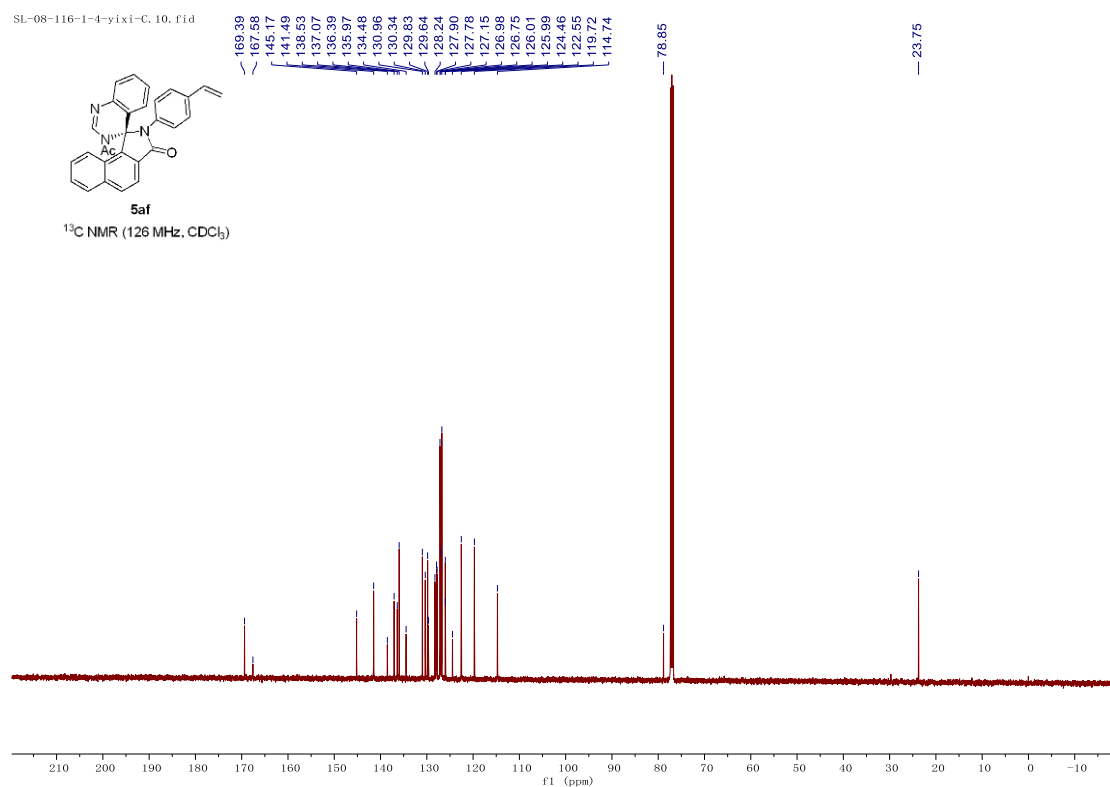



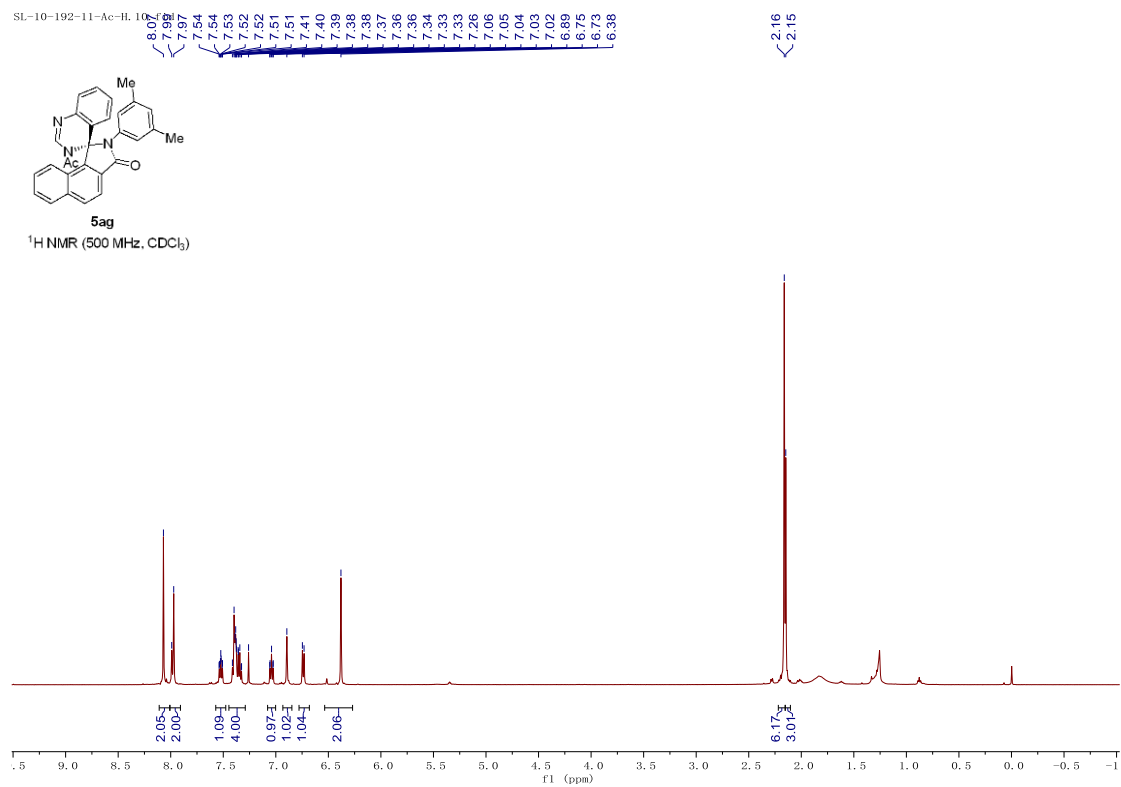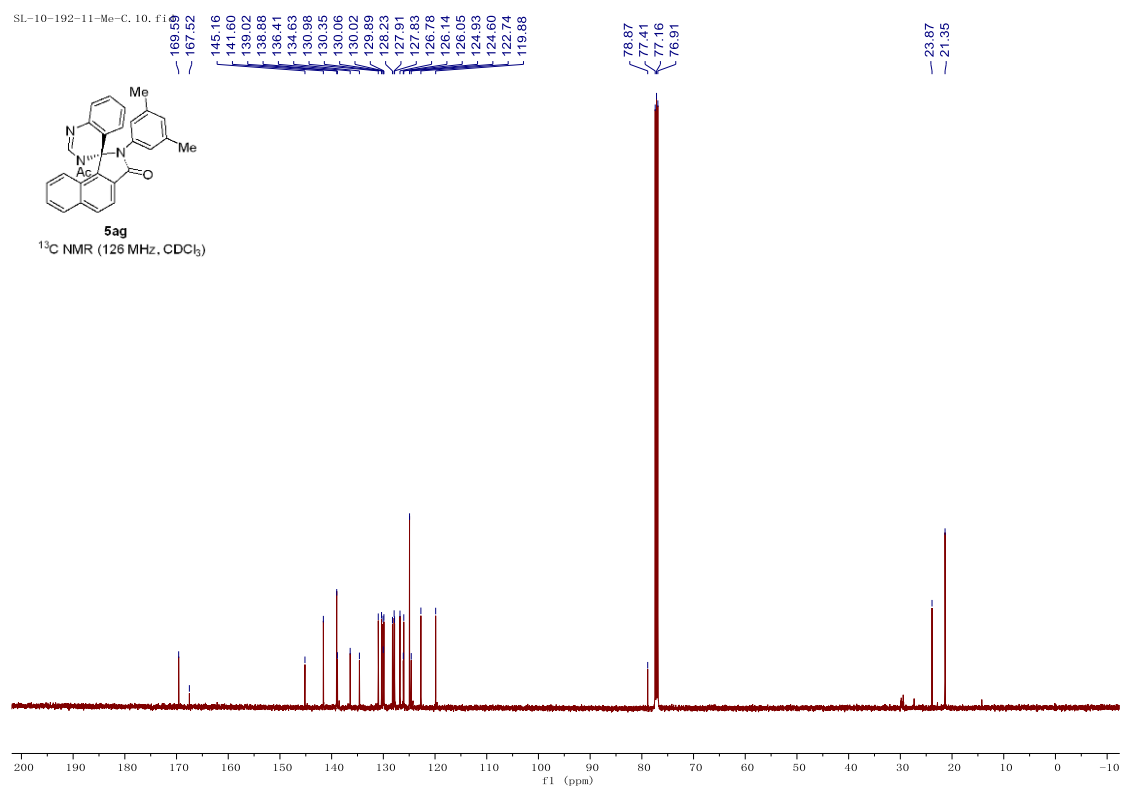

SL-08-116-2-P2-上乙酰基

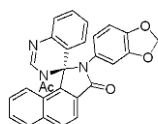

**5ah**

$^1\text{H}$  NMR (500 MHz,  $\text{CDCl}_3$ )

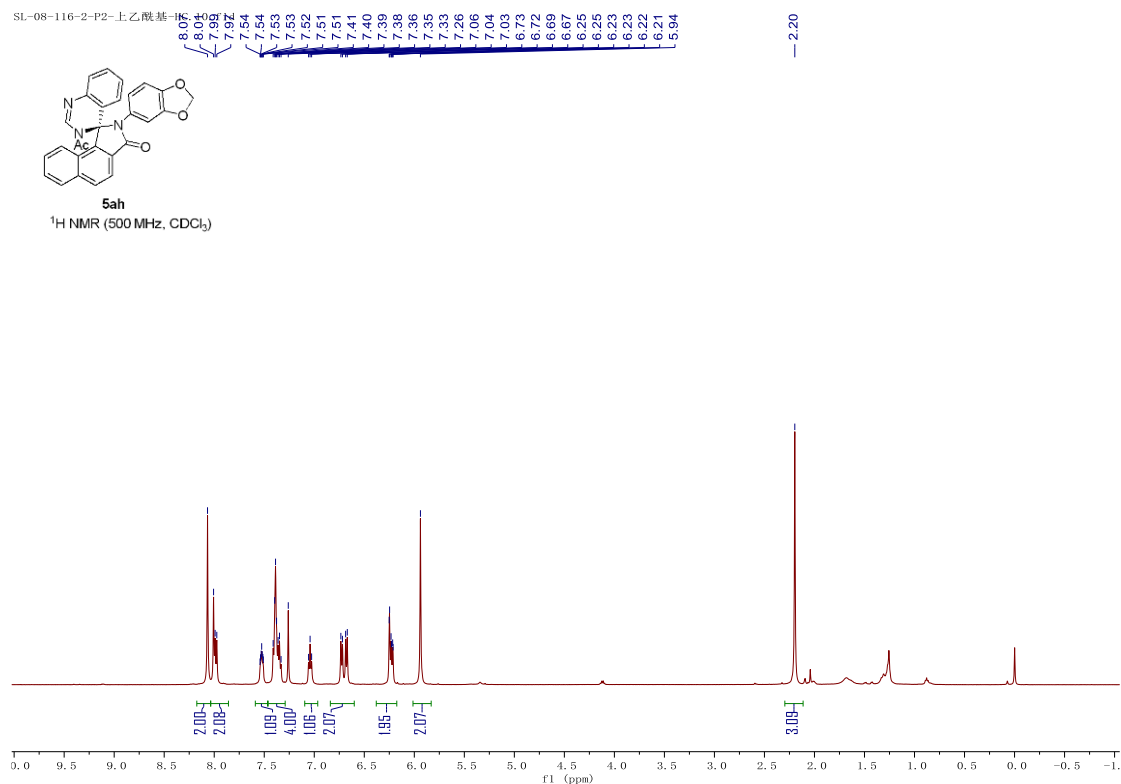

SL-08-116-2-Ac-C, 10, f1

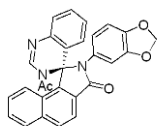

**5ah**

$^{13}\text{C}$  NMR (126 MHz,  $\text{CDCl}_3$ )

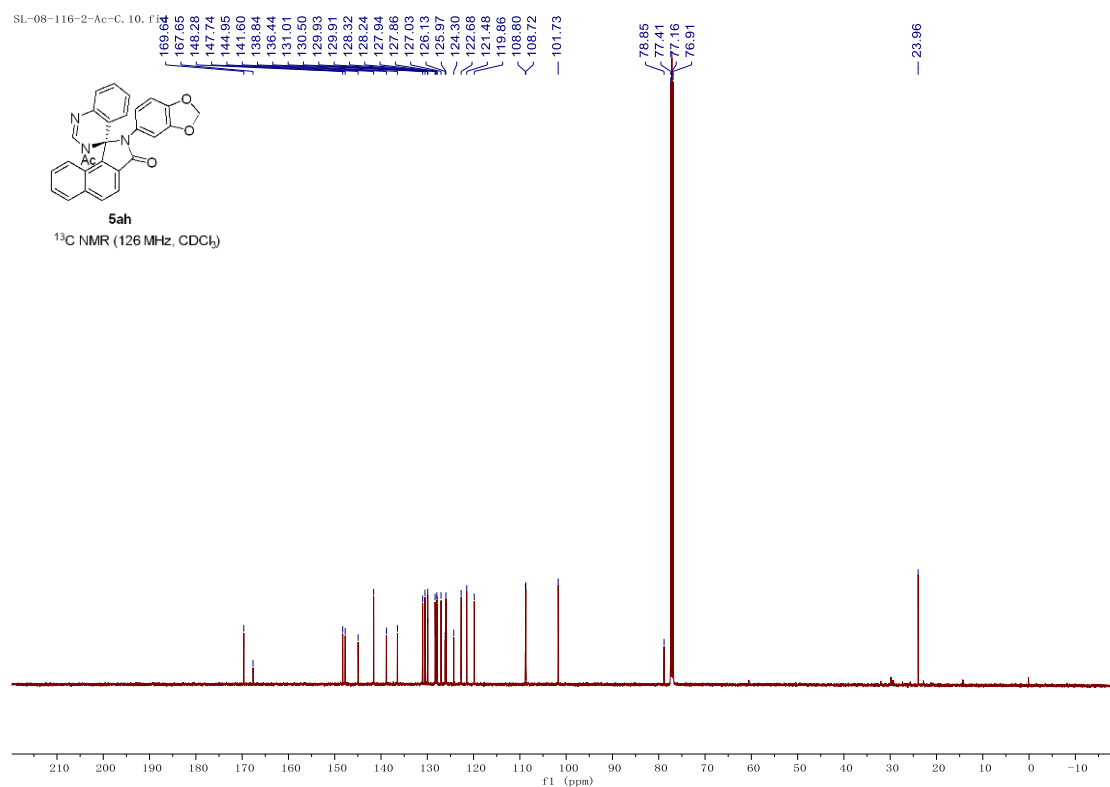

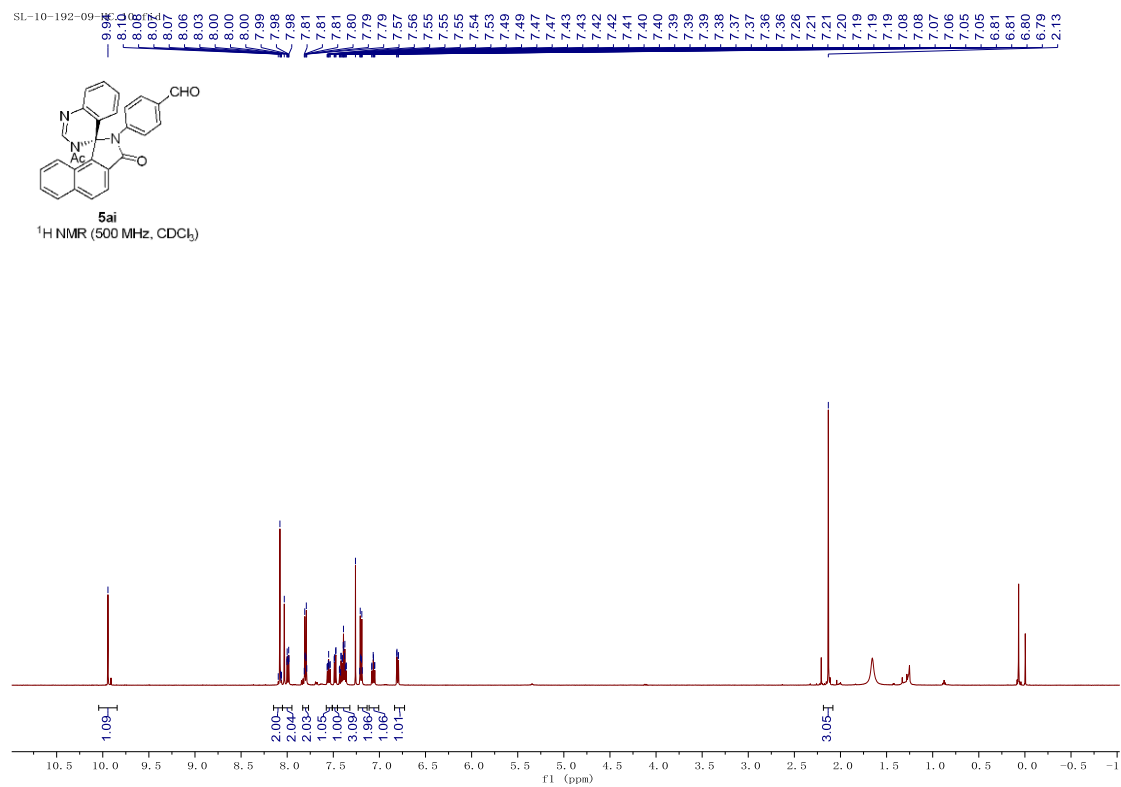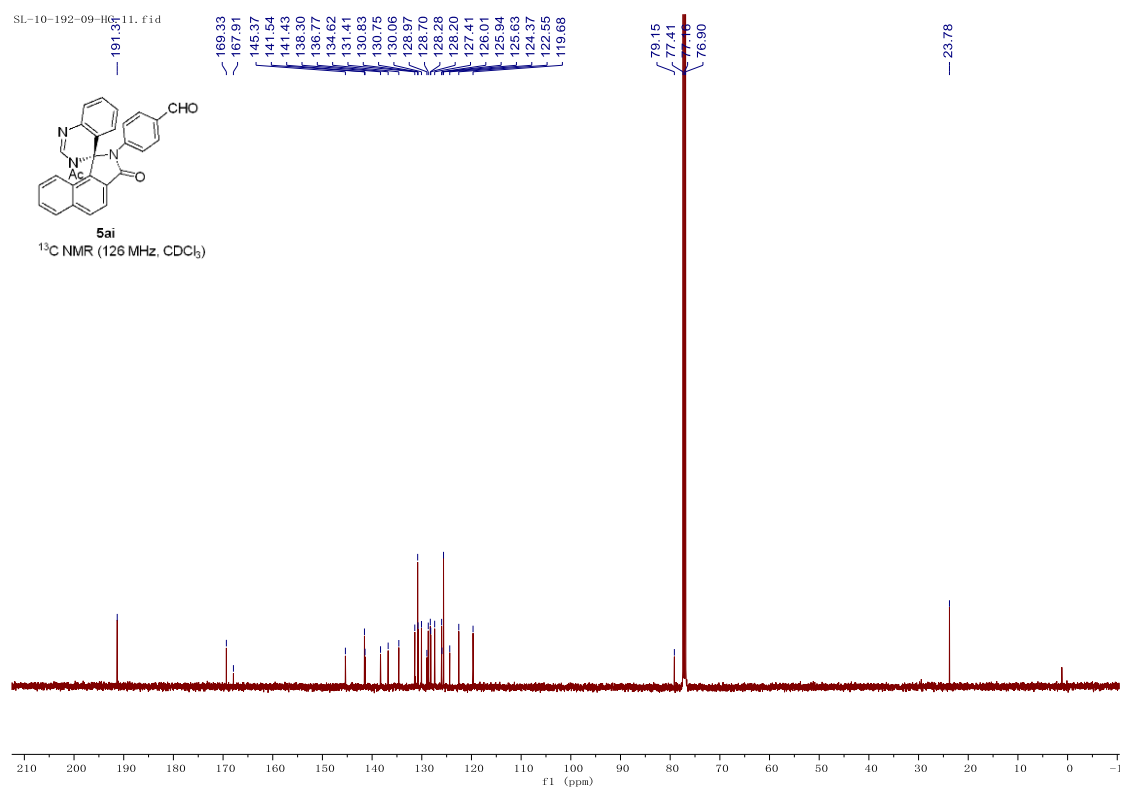

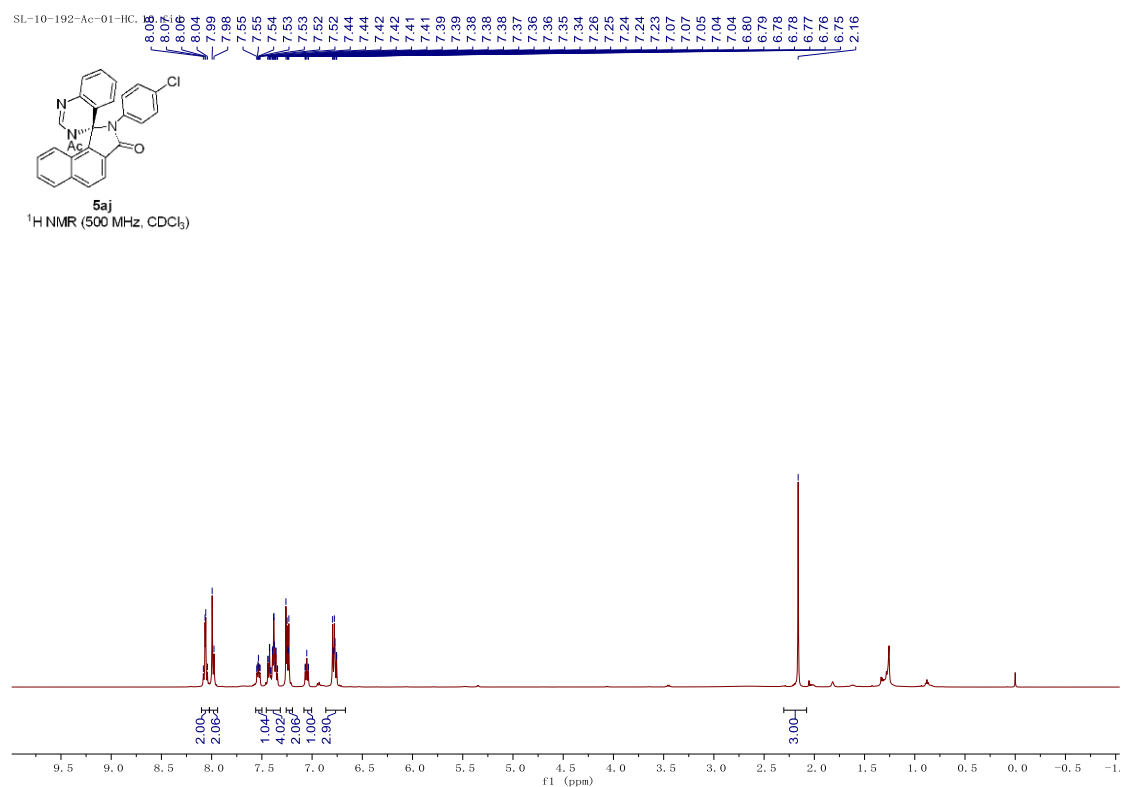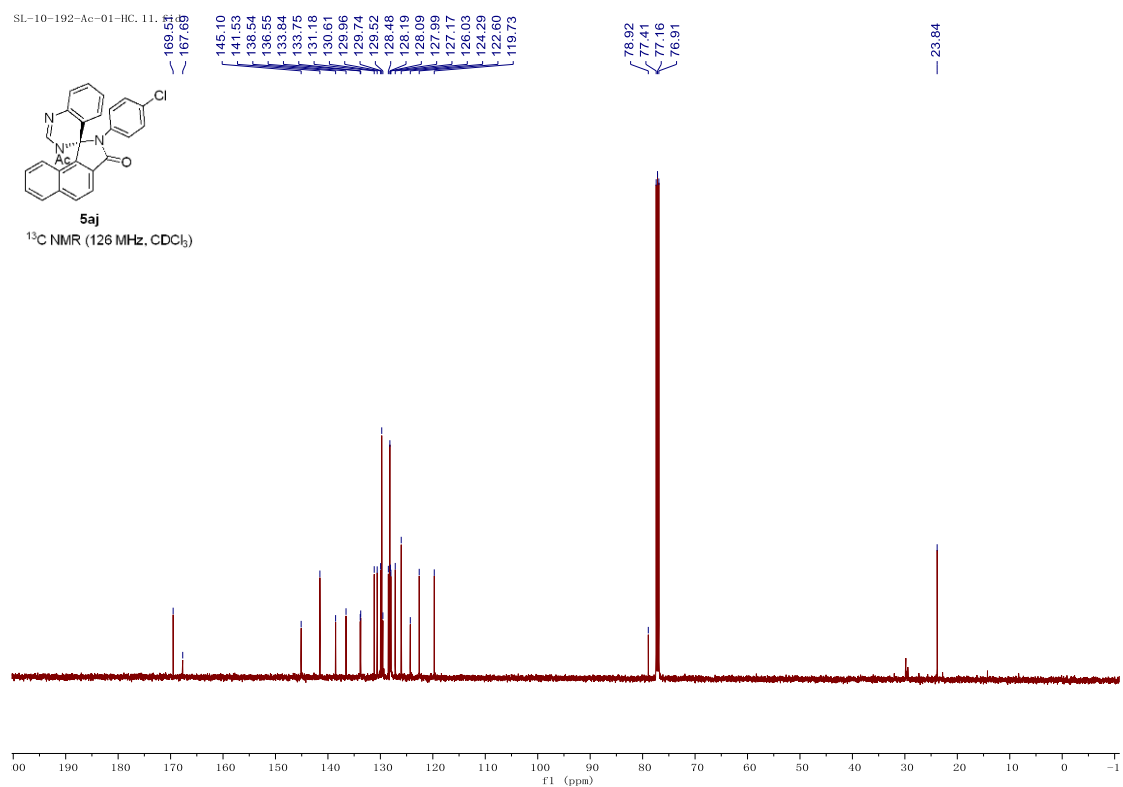

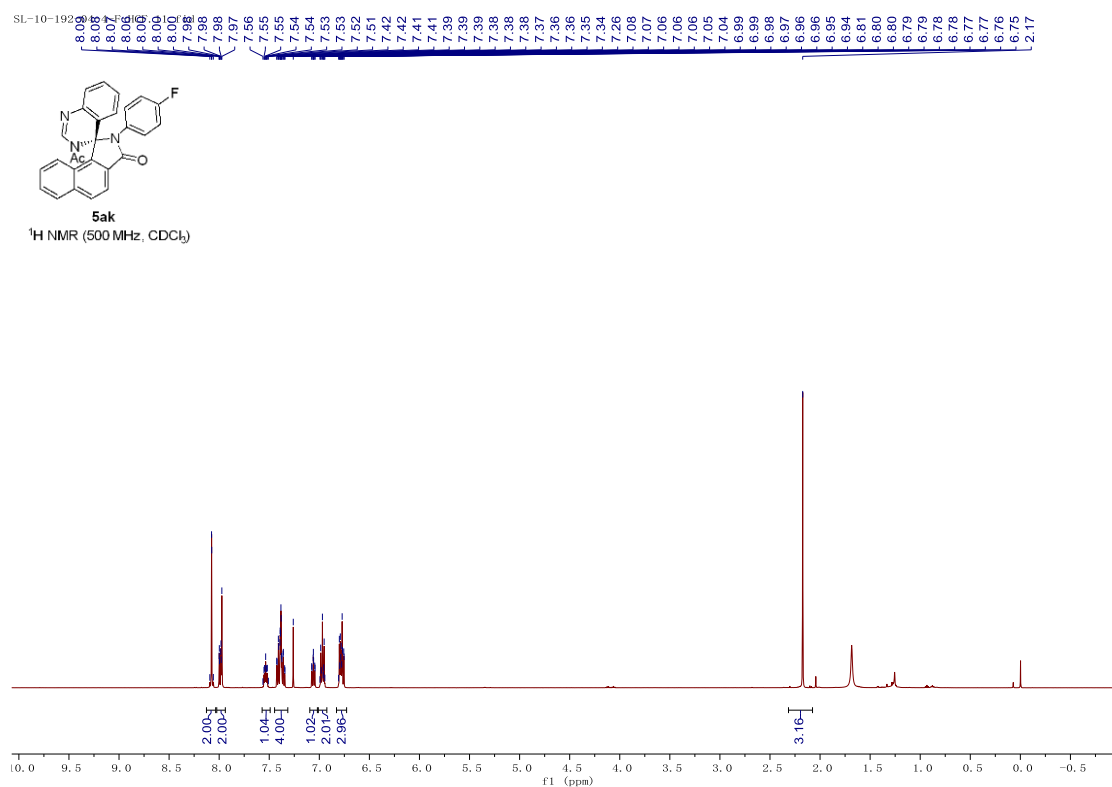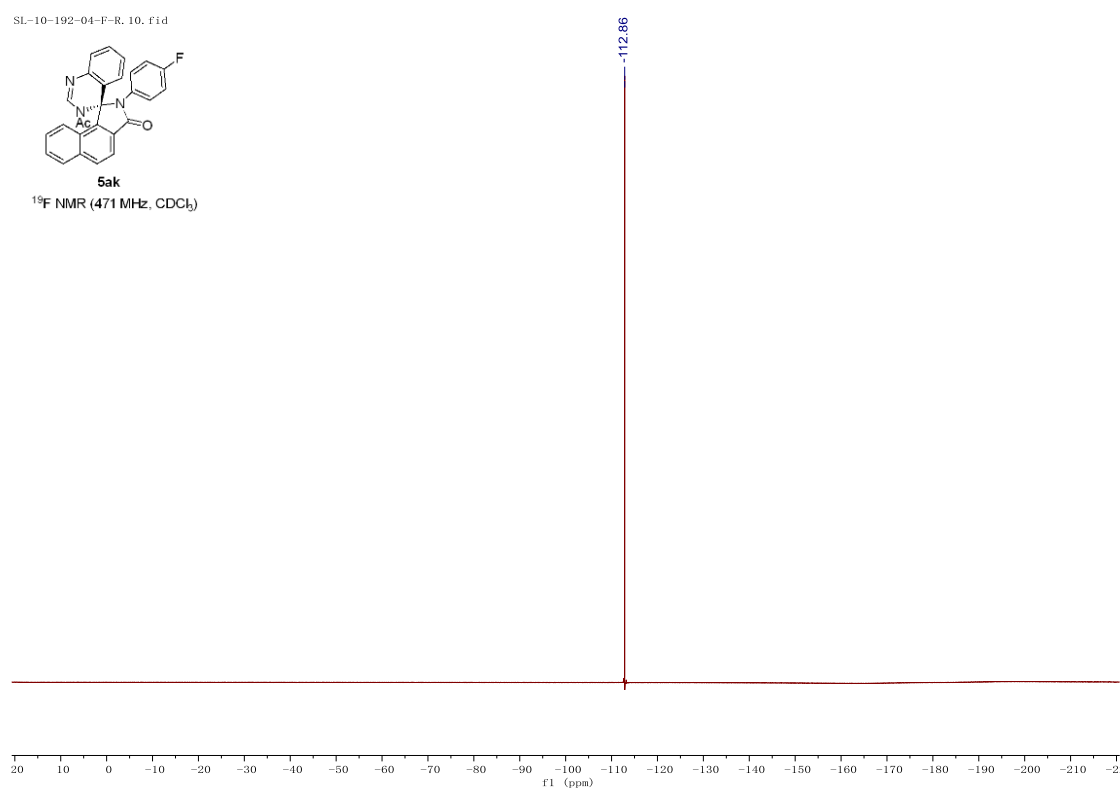

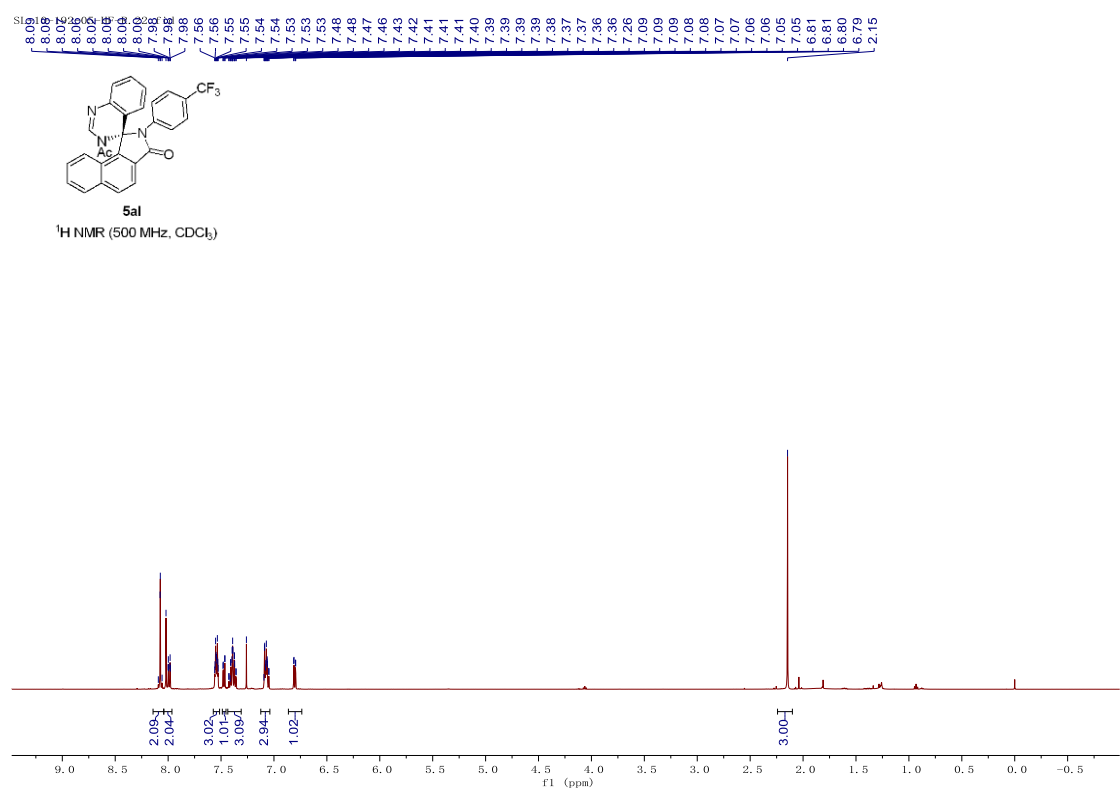

SL-10-192-05-HF-R, 23. fid

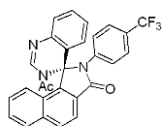

5al

<sup>19</sup>F NMR (471 MHz, CDCl<sub>3</sub>)

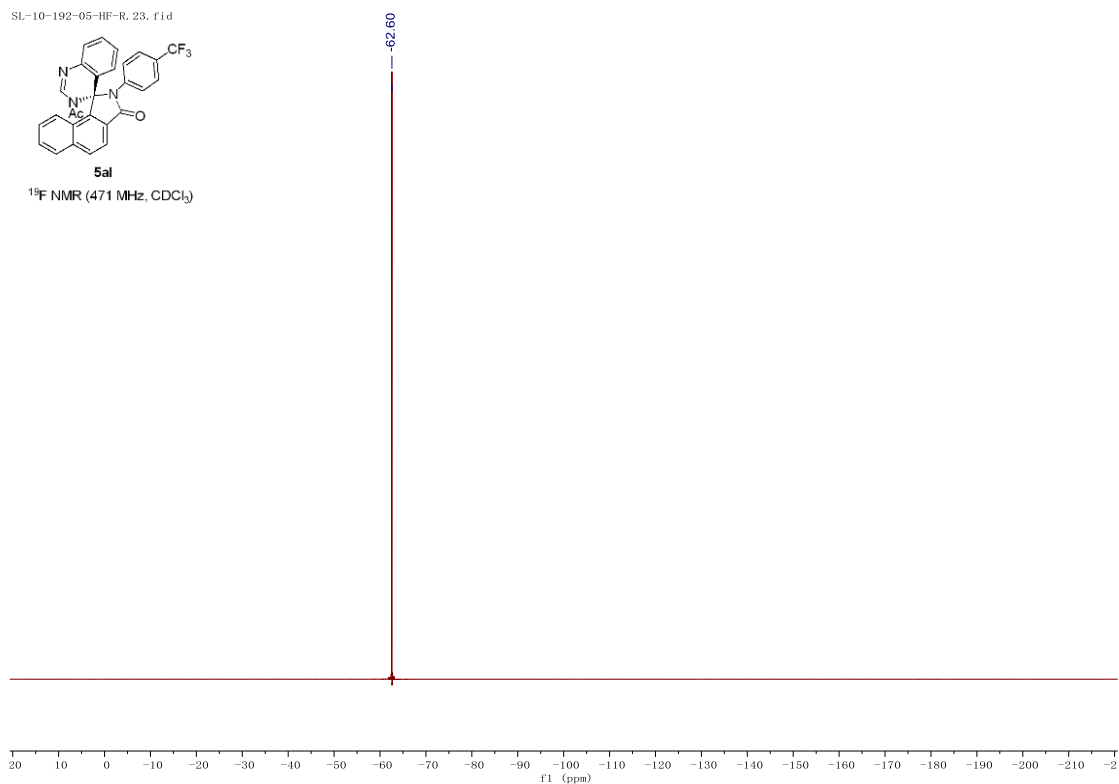

SL-10-192-05-C, 10. fid

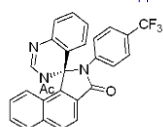

5al

<sup>13</sup>C NMR (126 MHz, CDCl<sub>3</sub>)

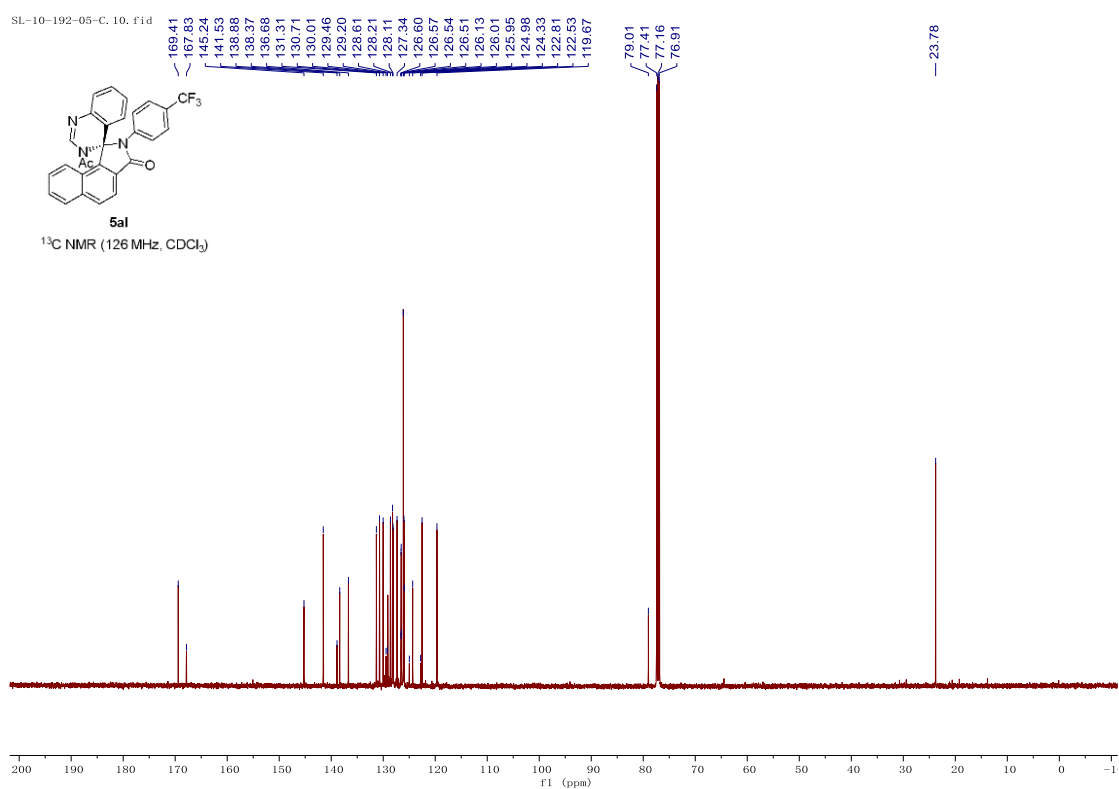

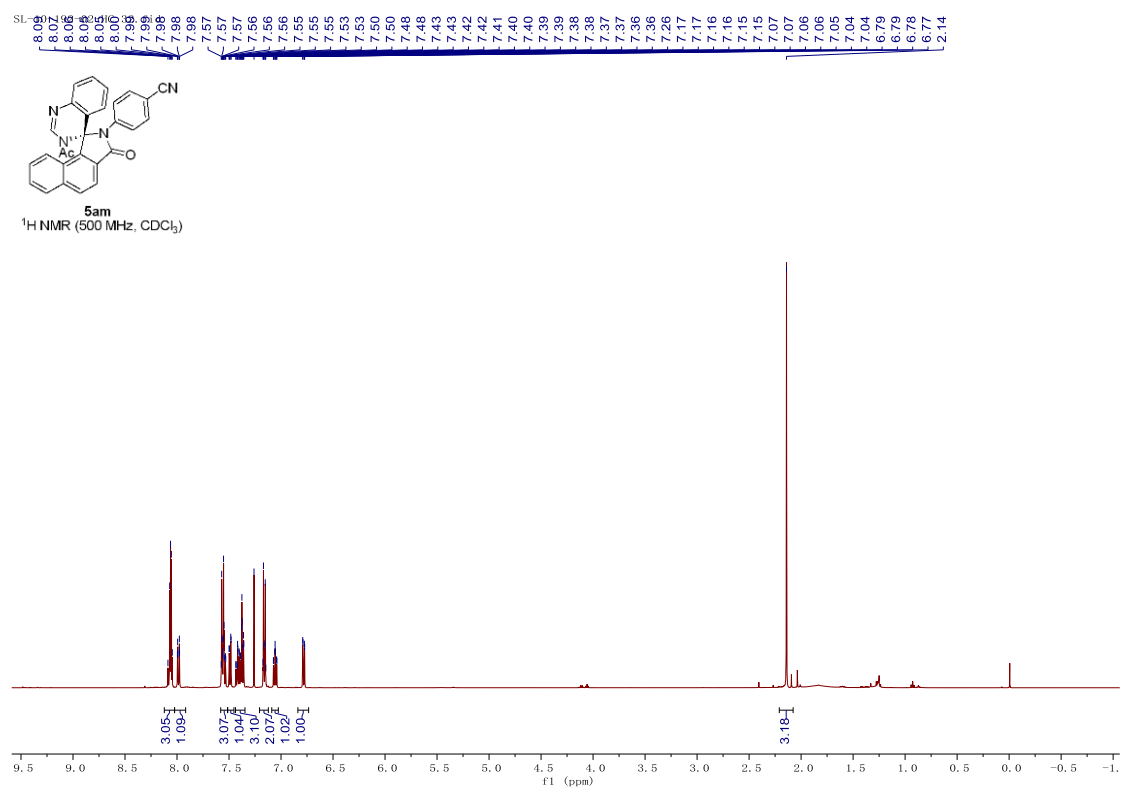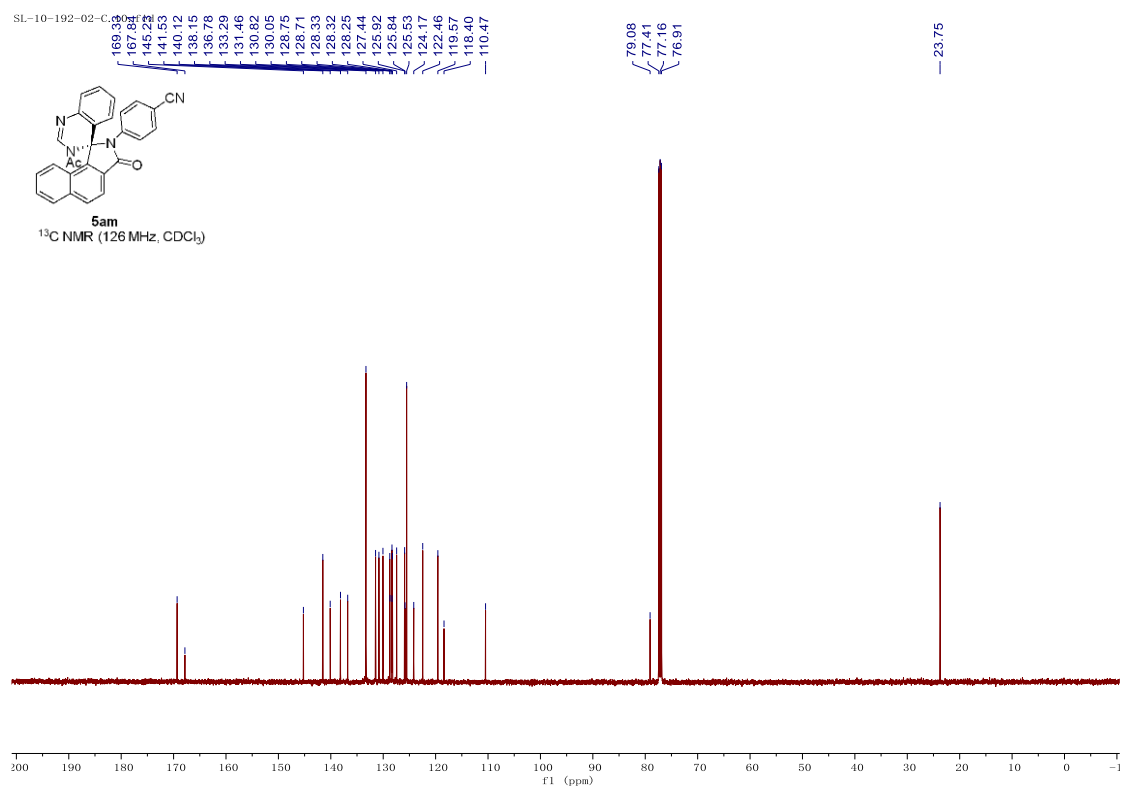



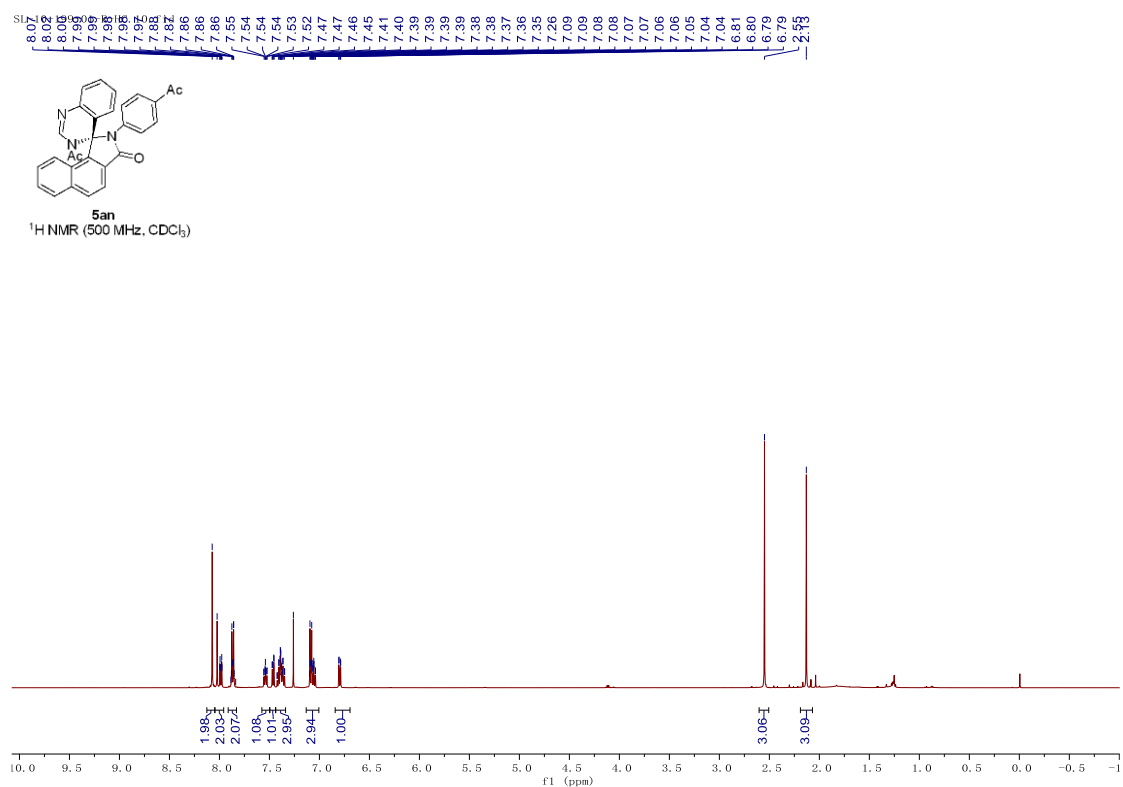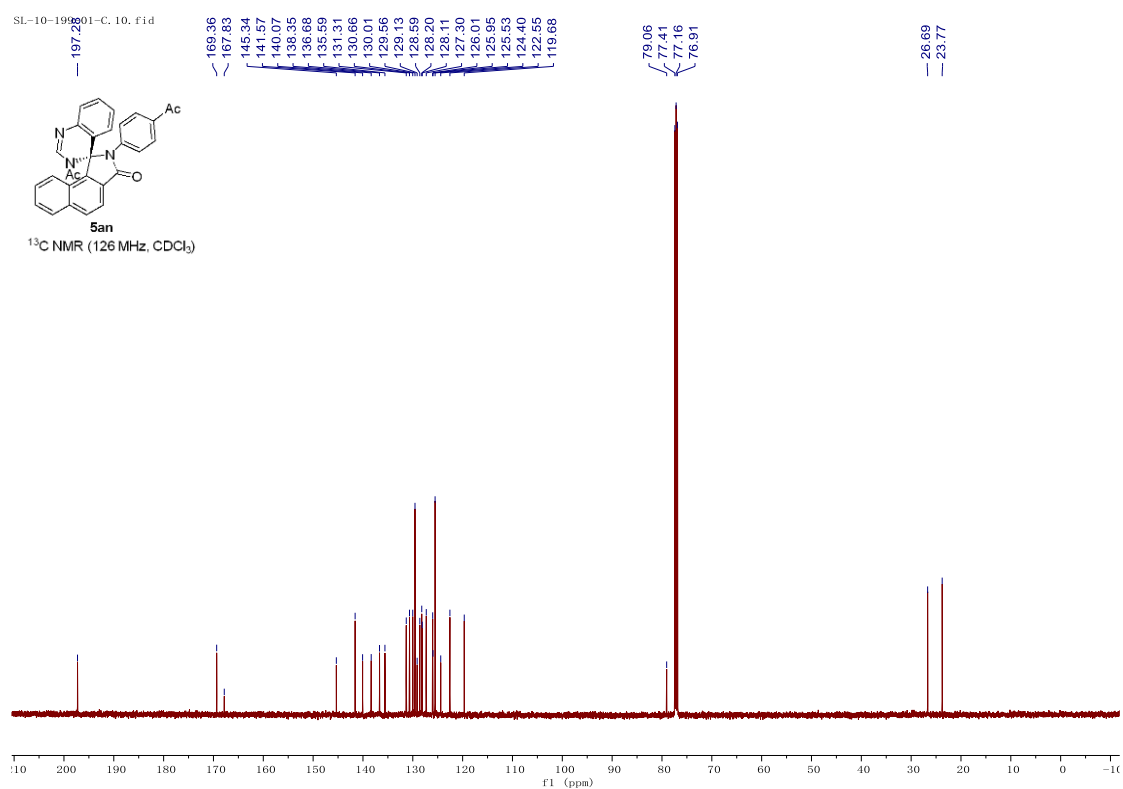

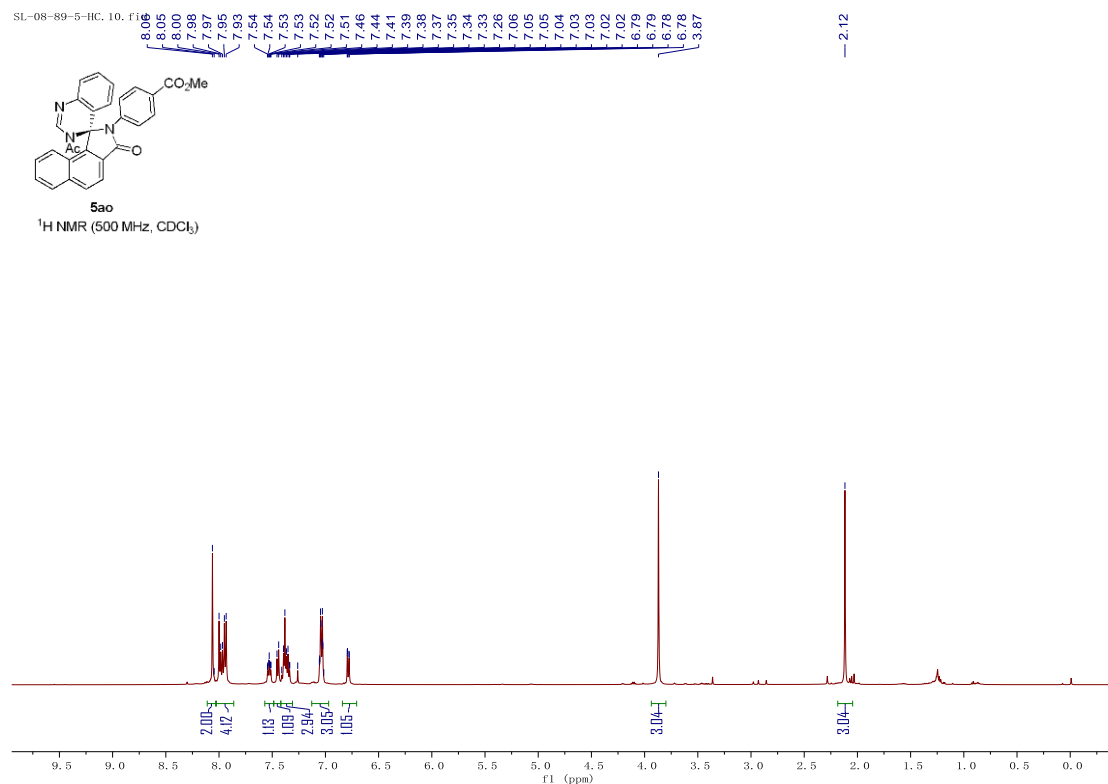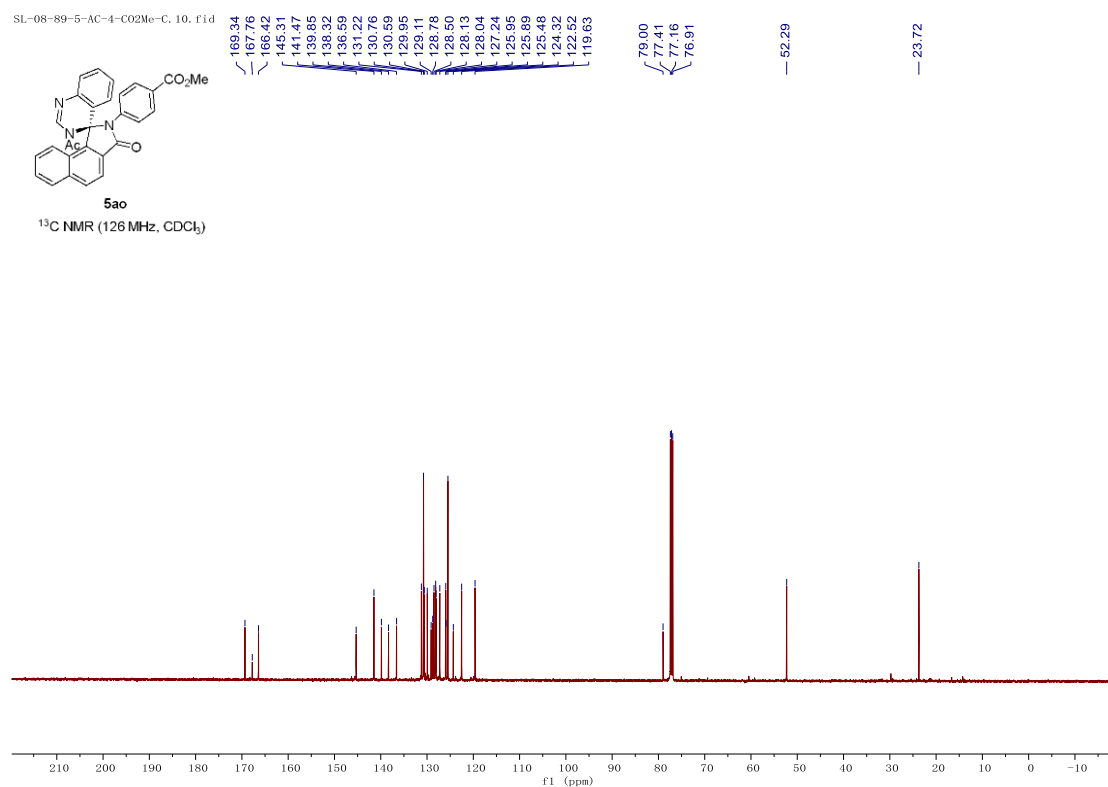

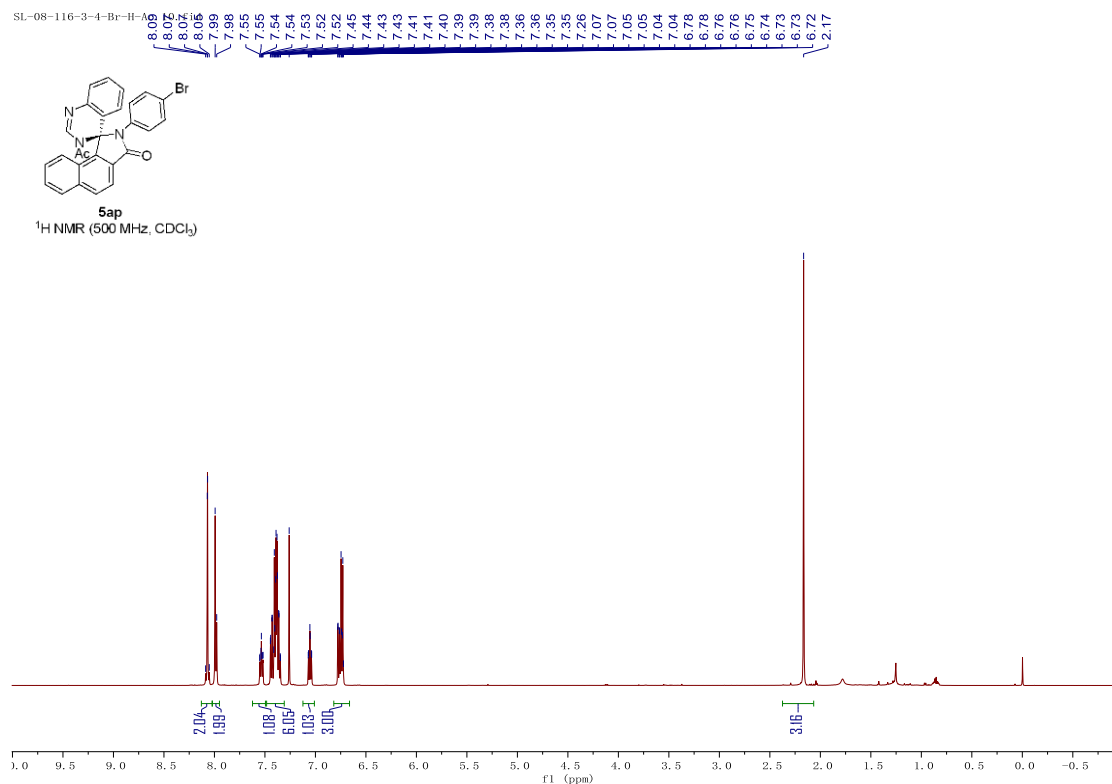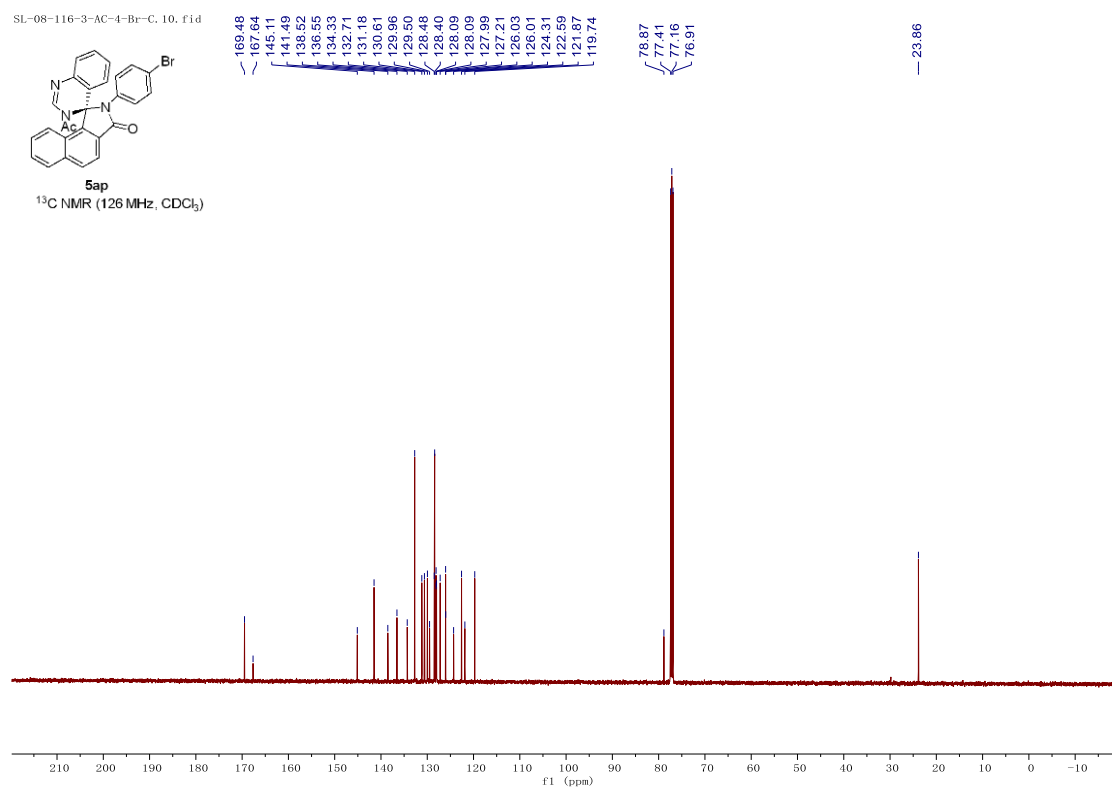

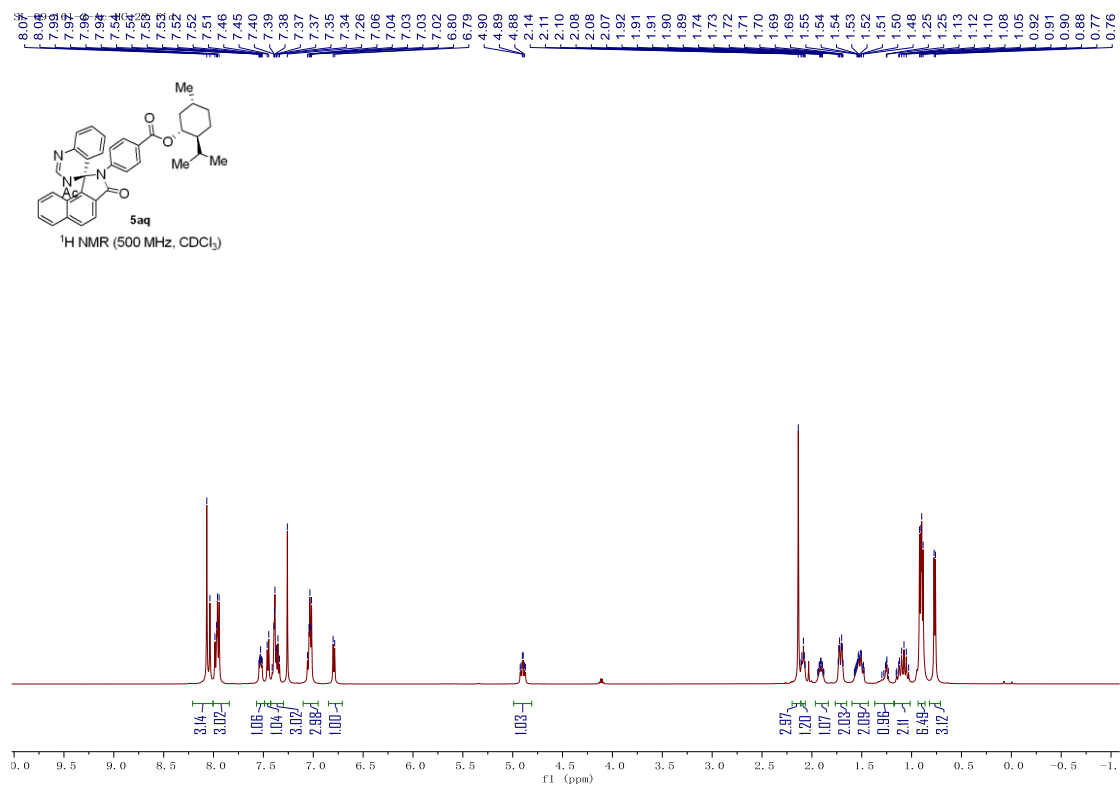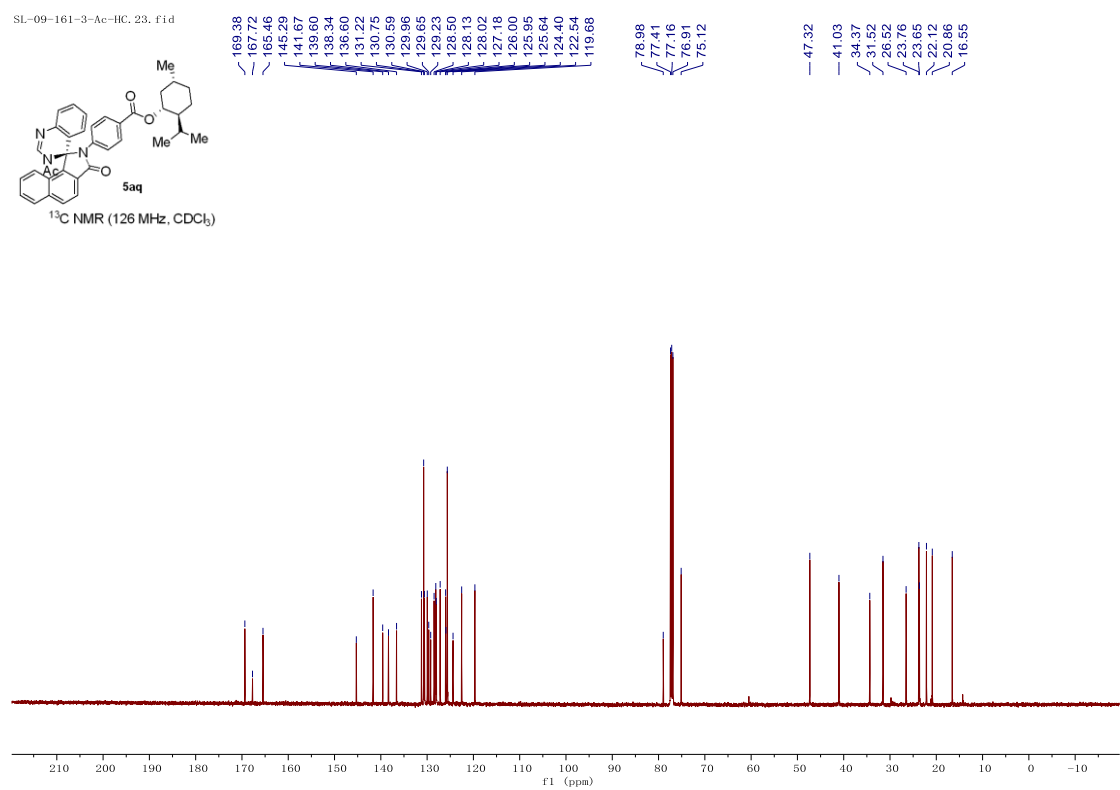

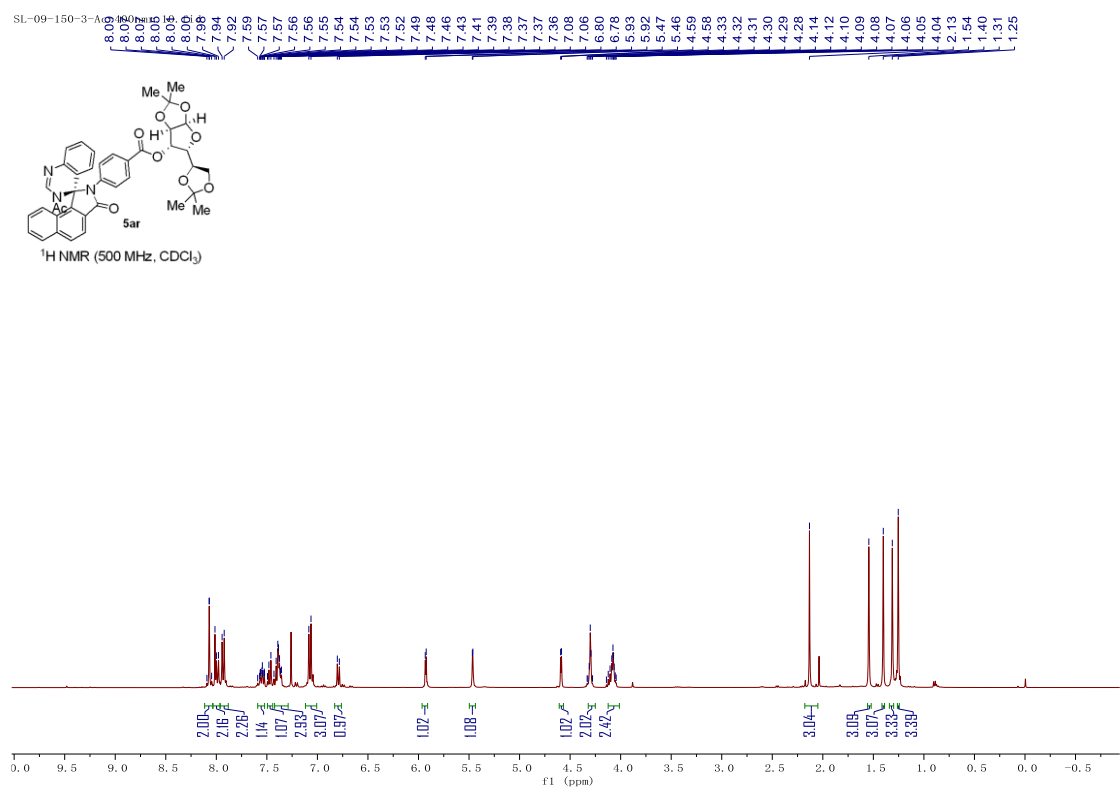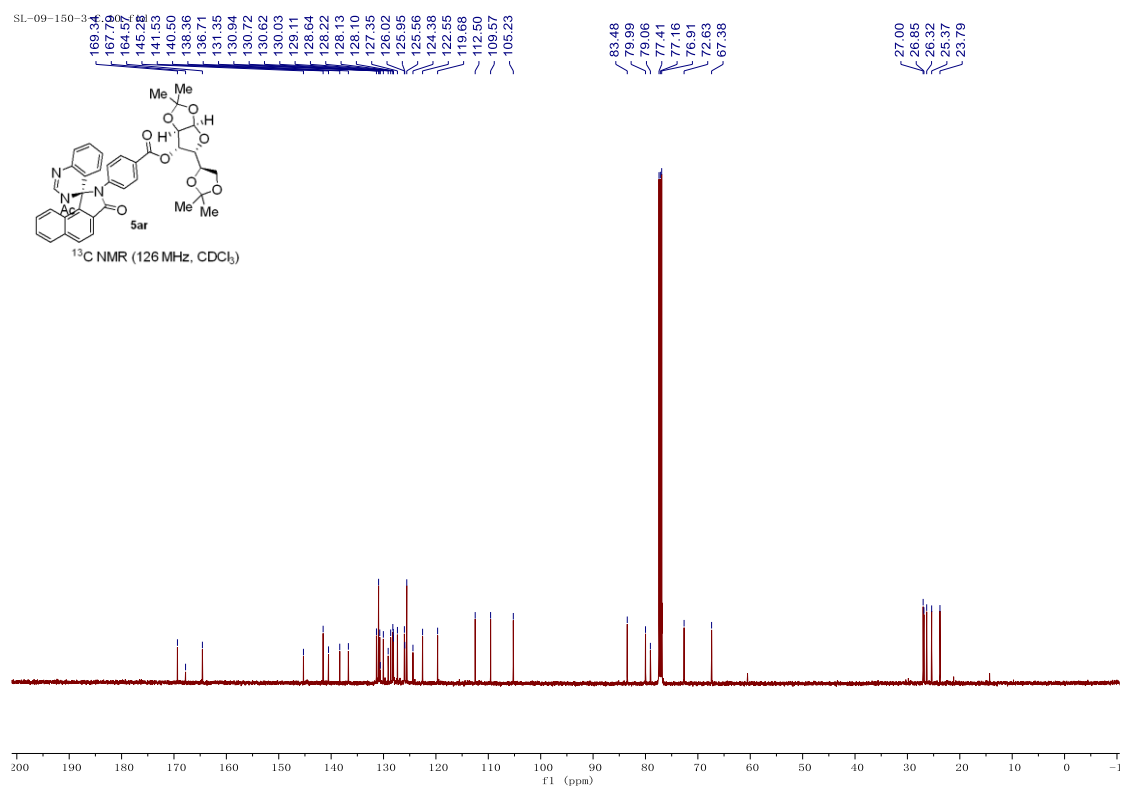

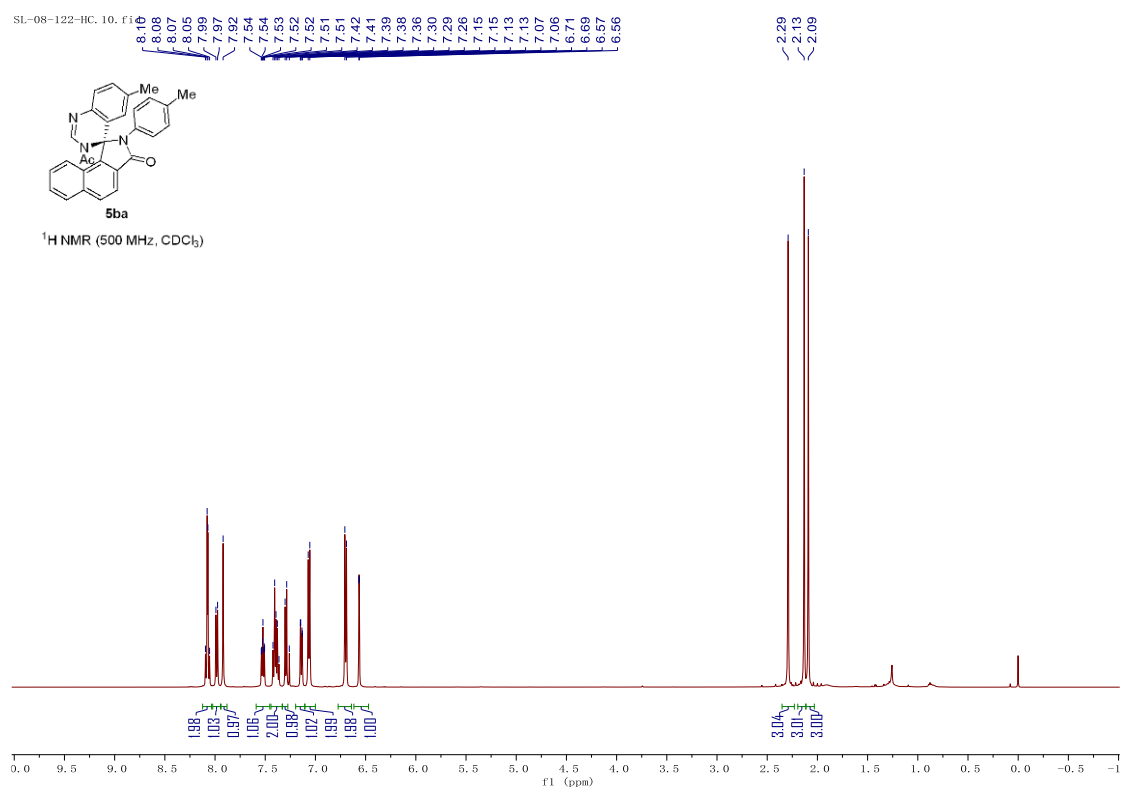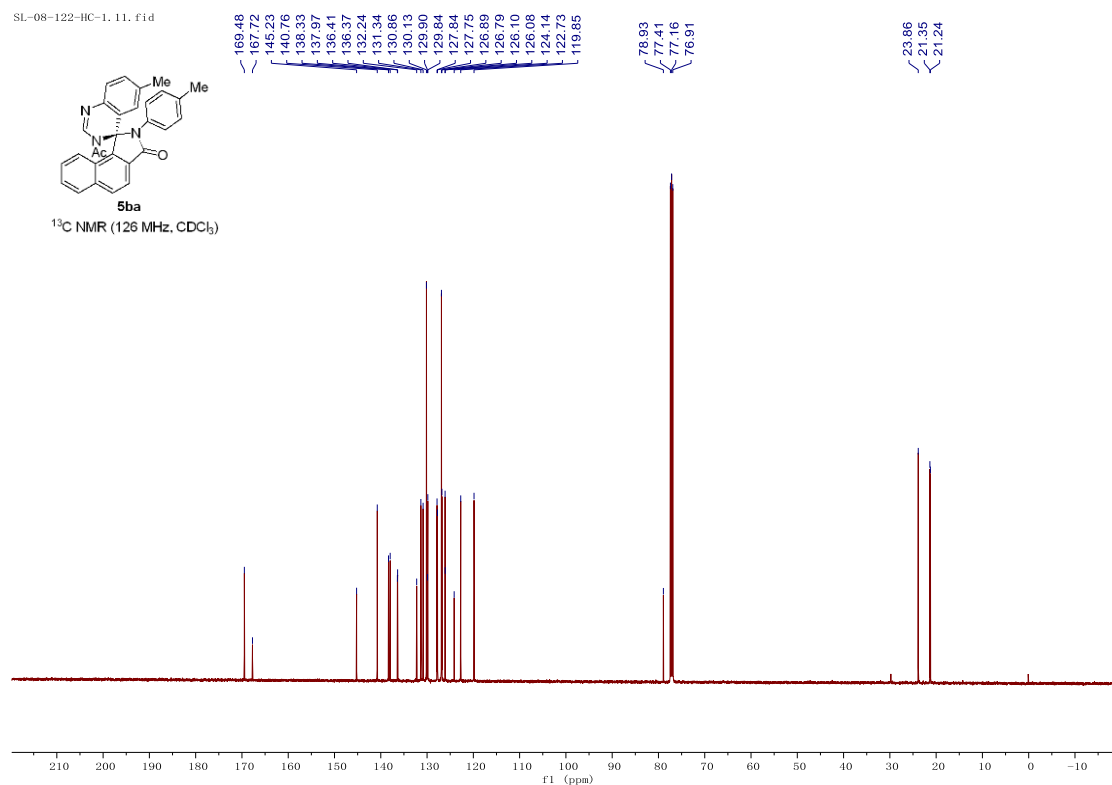

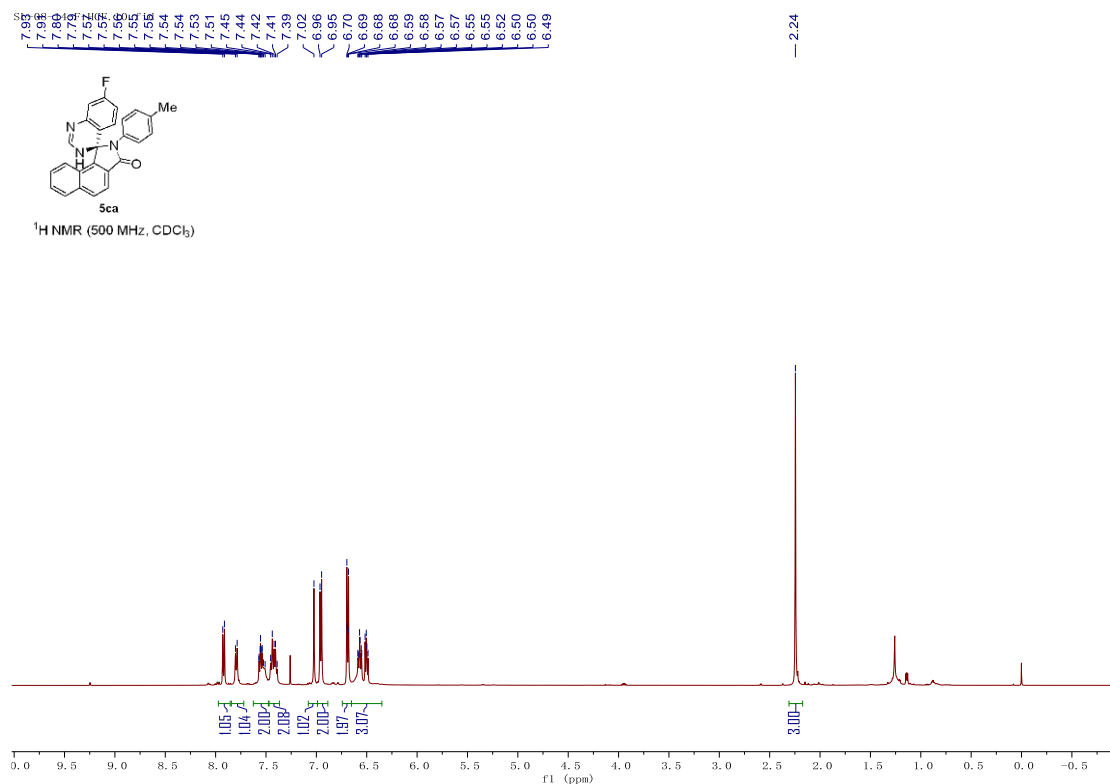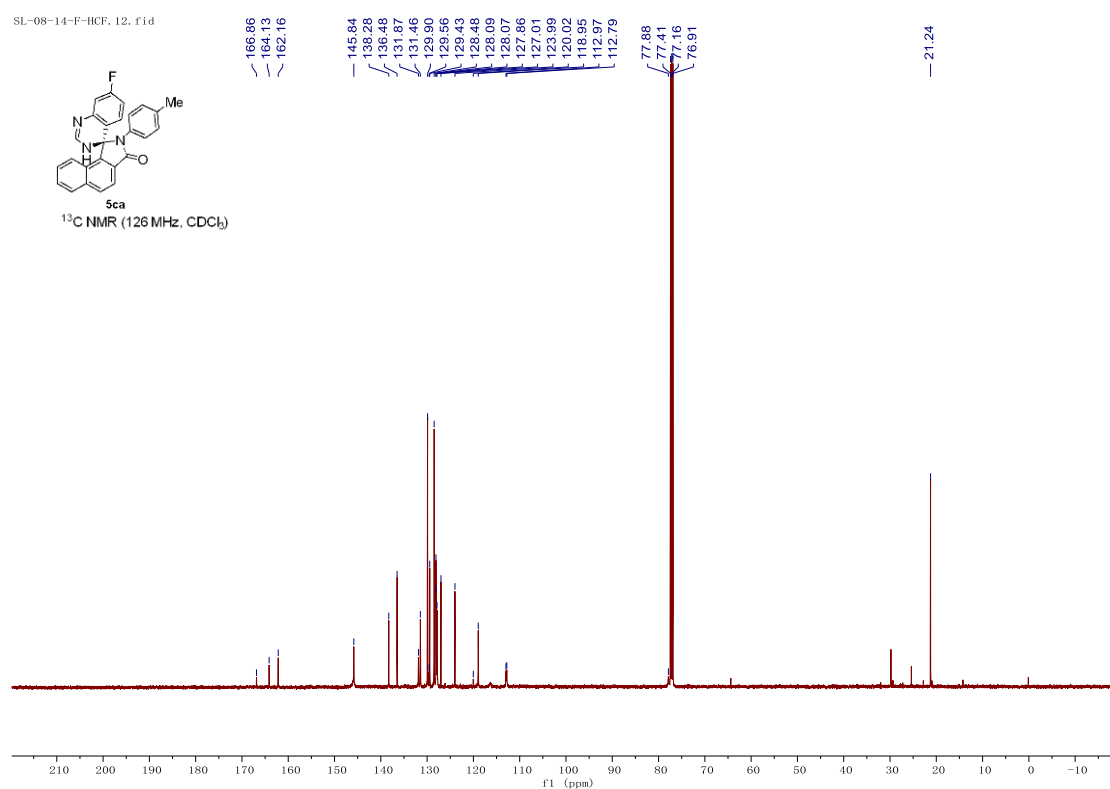

SL-08-14-F-HCF, 11, fid

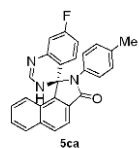

5ca  
 $^{19}\text{F}$  NMR (471 MHz,  $\text{CDCl}_3$ )

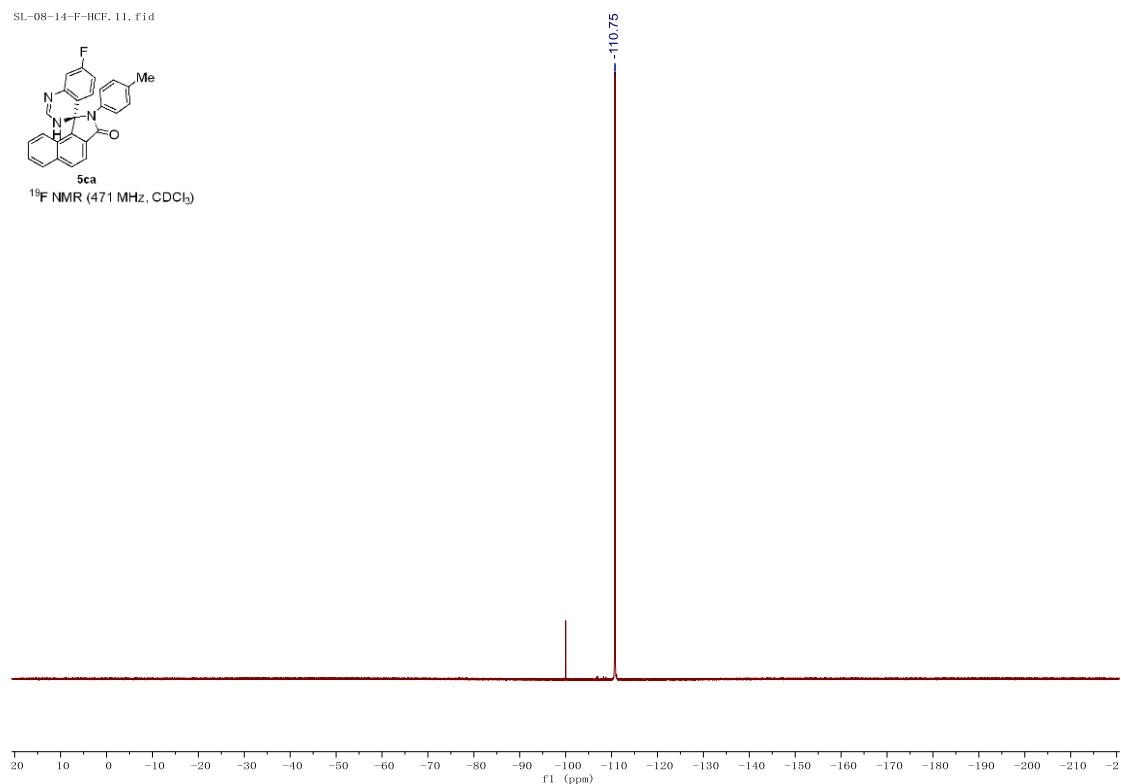

SL-07-

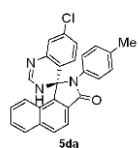

5da  
 $^1\text{H}$  NMR (500 MHz,  $\text{CDCl}_3$ )

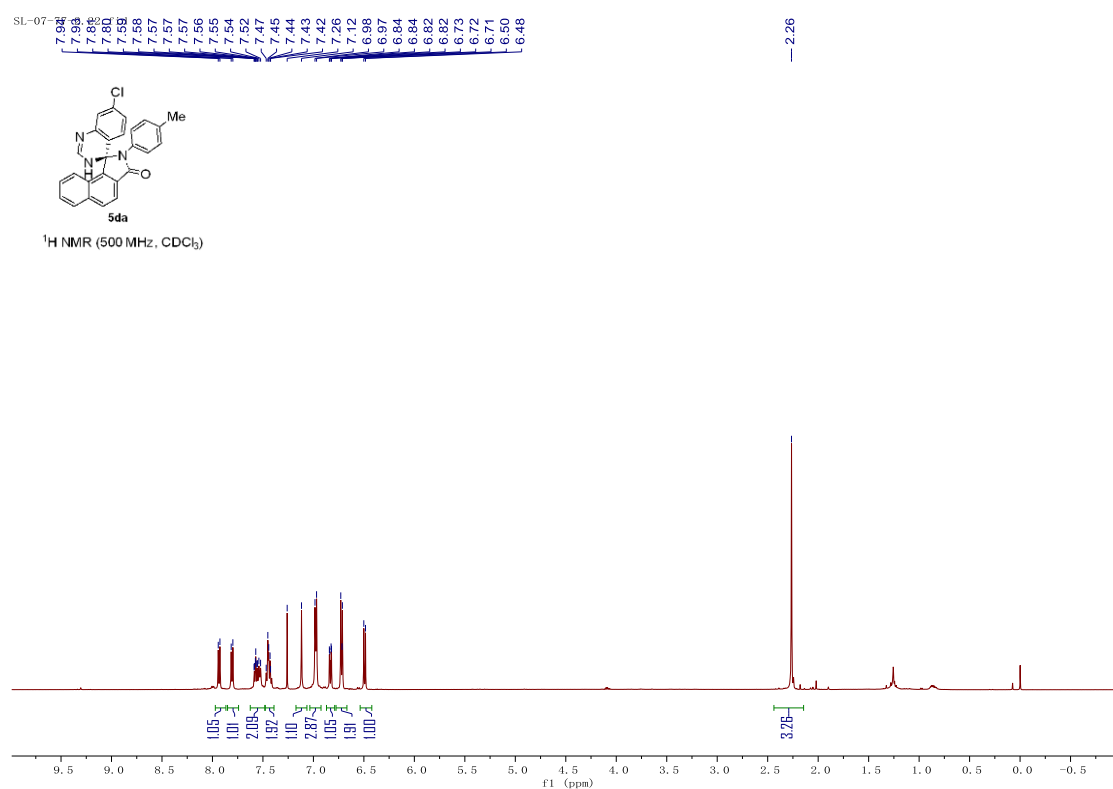



SL-07-77-2.23.fid

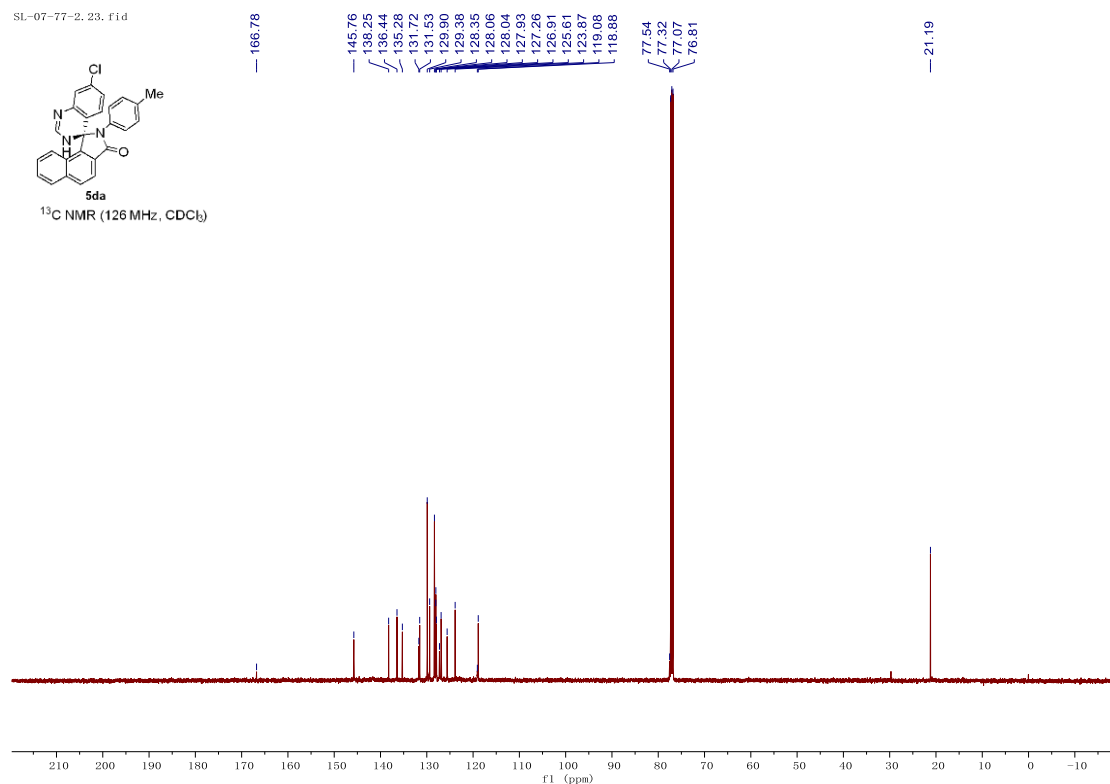

SL-09-185-5-HCF.

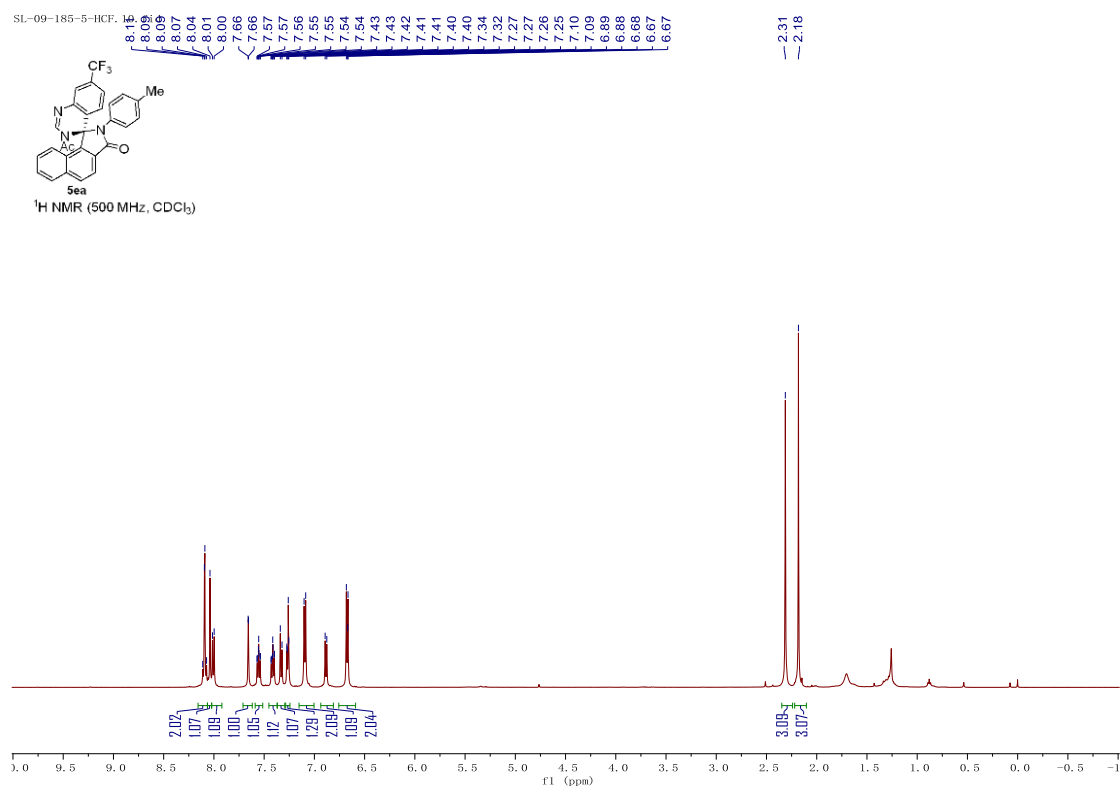

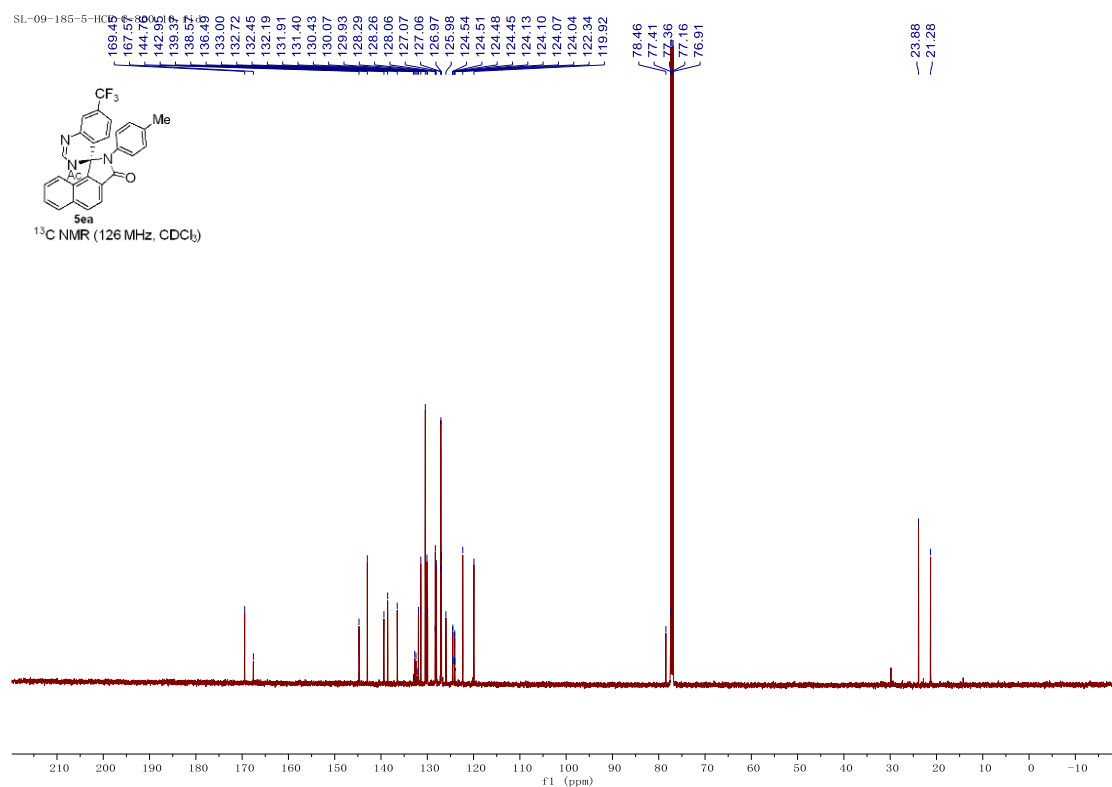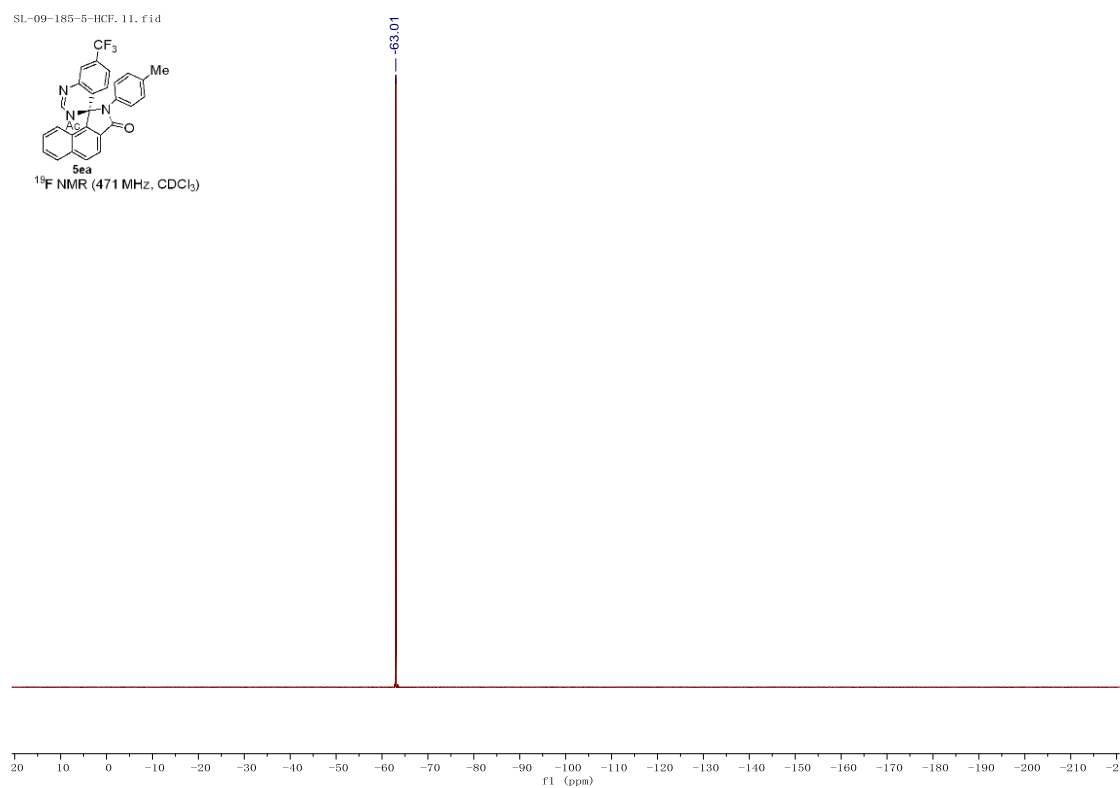



SL-08-45-HC-1127, 11, fid

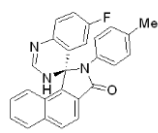

5fa  
<sup>19</sup>F NMR (471 MHz, CDCl<sub>3</sub>)

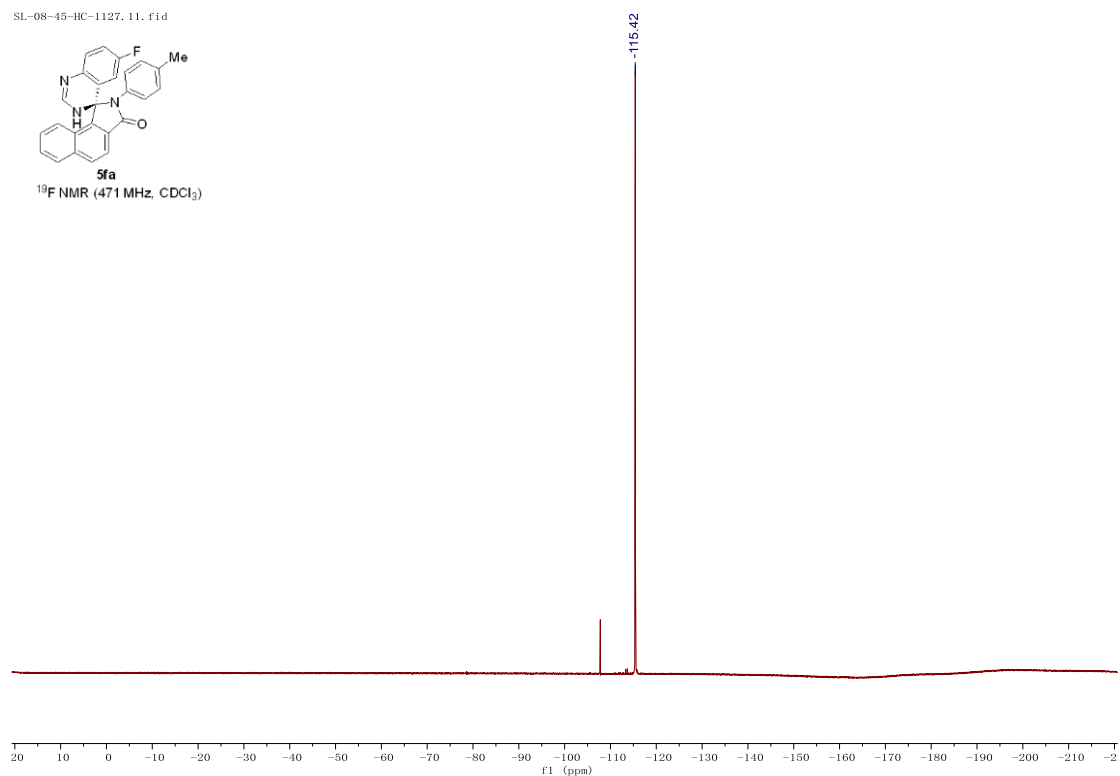

SL-08-60-H-

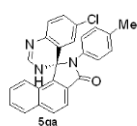

5ga  
<sup>1</sup>H NMR (500 MHz, CDCl<sub>3</sub>)

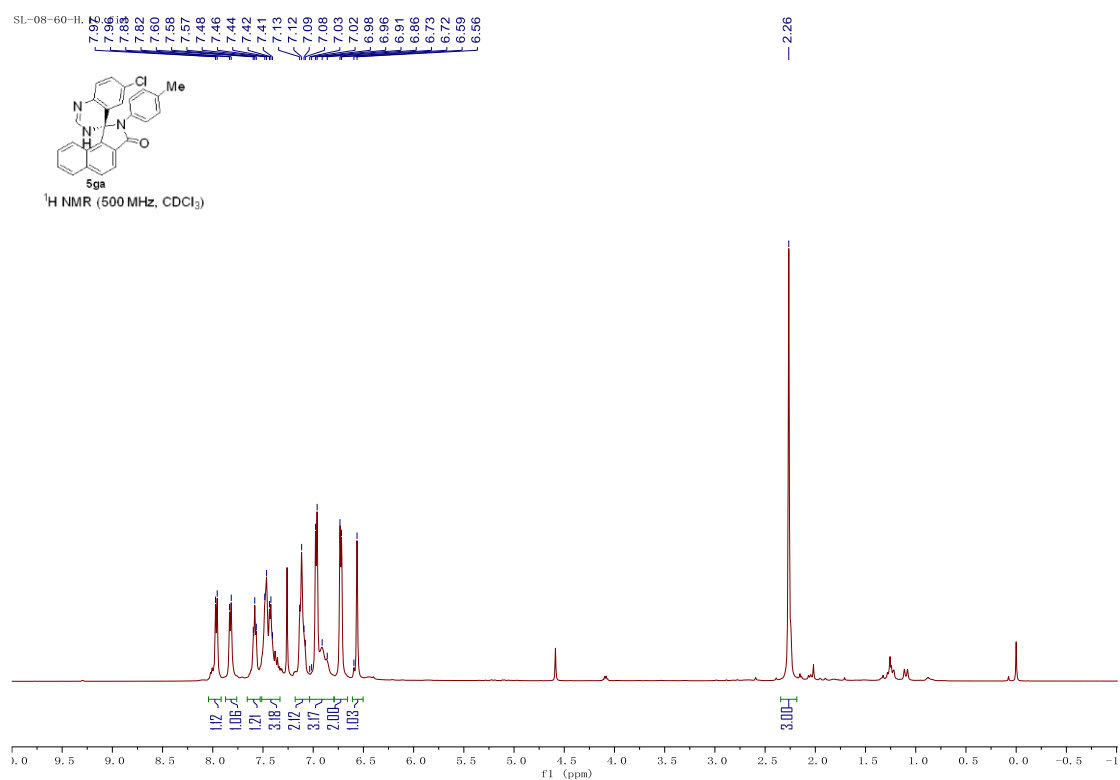

SL-08-60-HC, 10, f1d

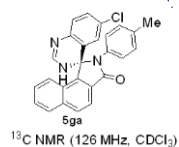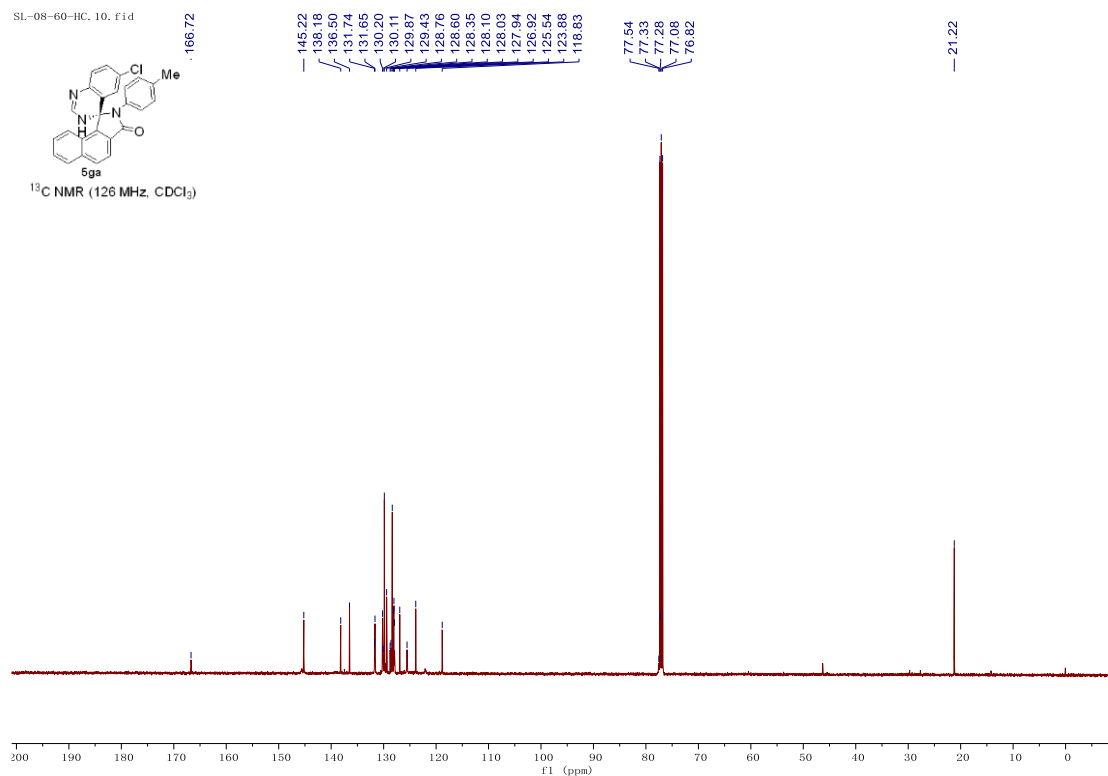

SL-09-160-2-Ac-HC,

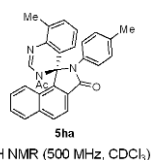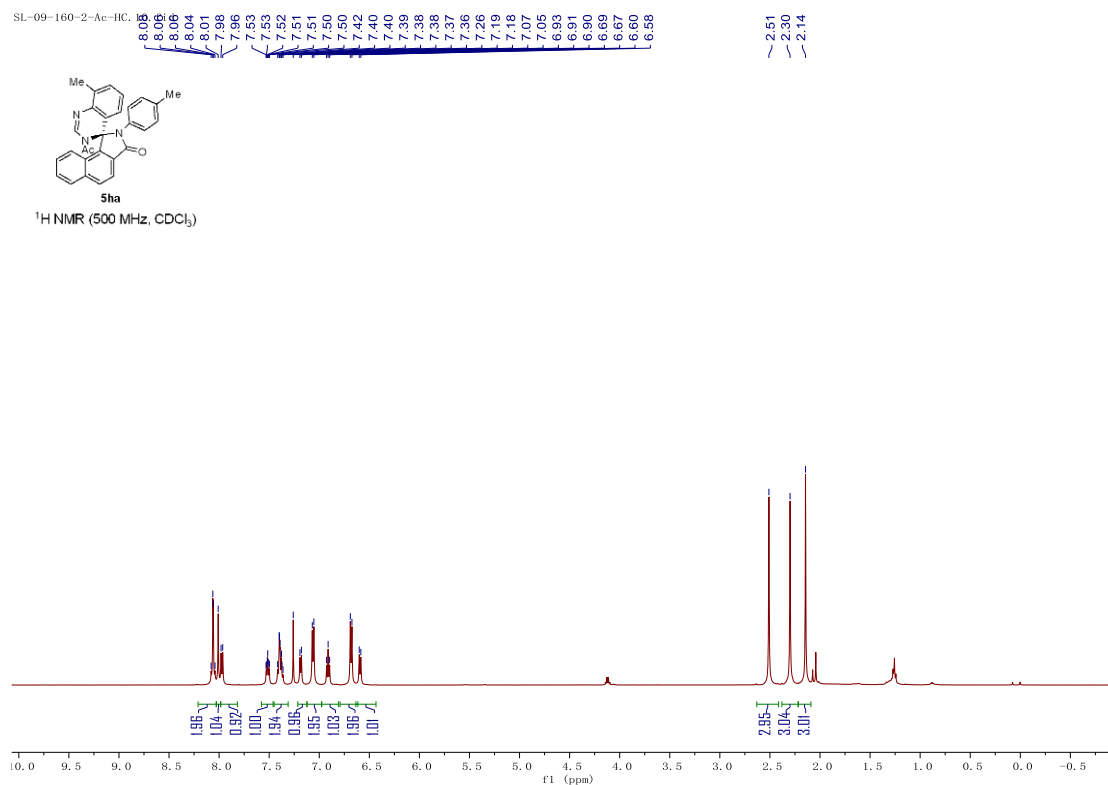

SL-09-160-2-Ac-HC. 11. f1d

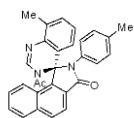

**5ha**  
<sup>13</sup>C NMR (126 MHz, CDCl<sub>3</sub>)

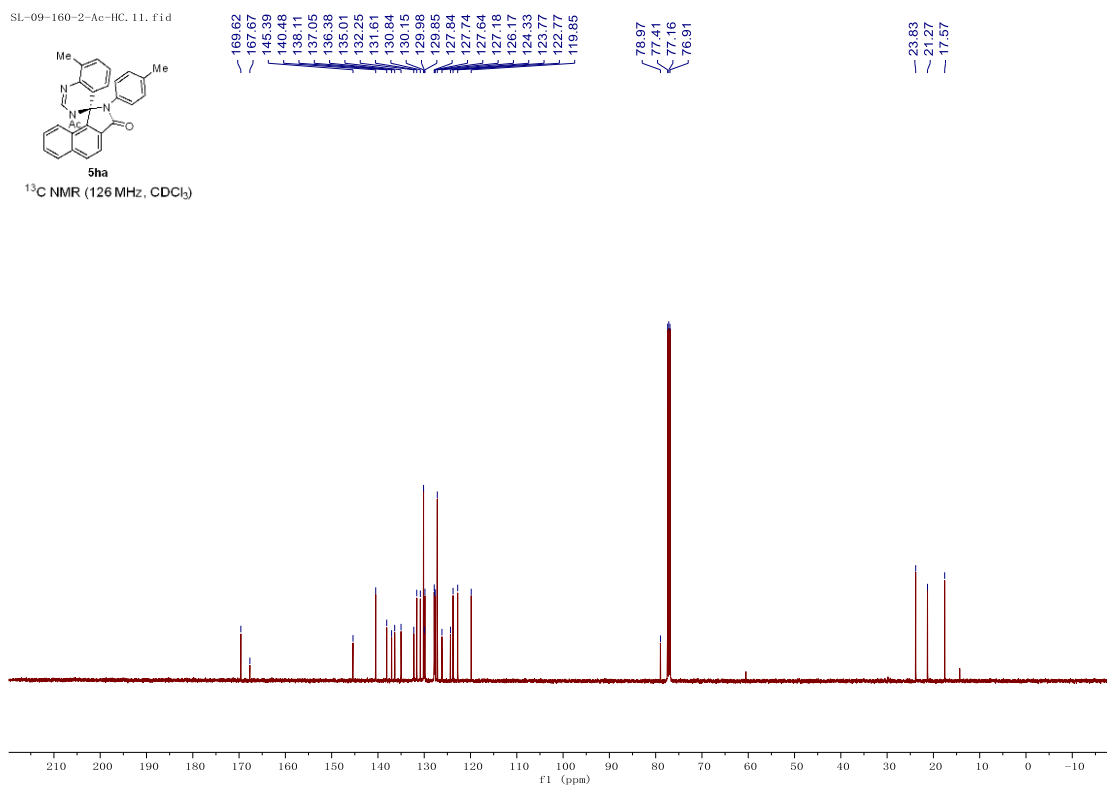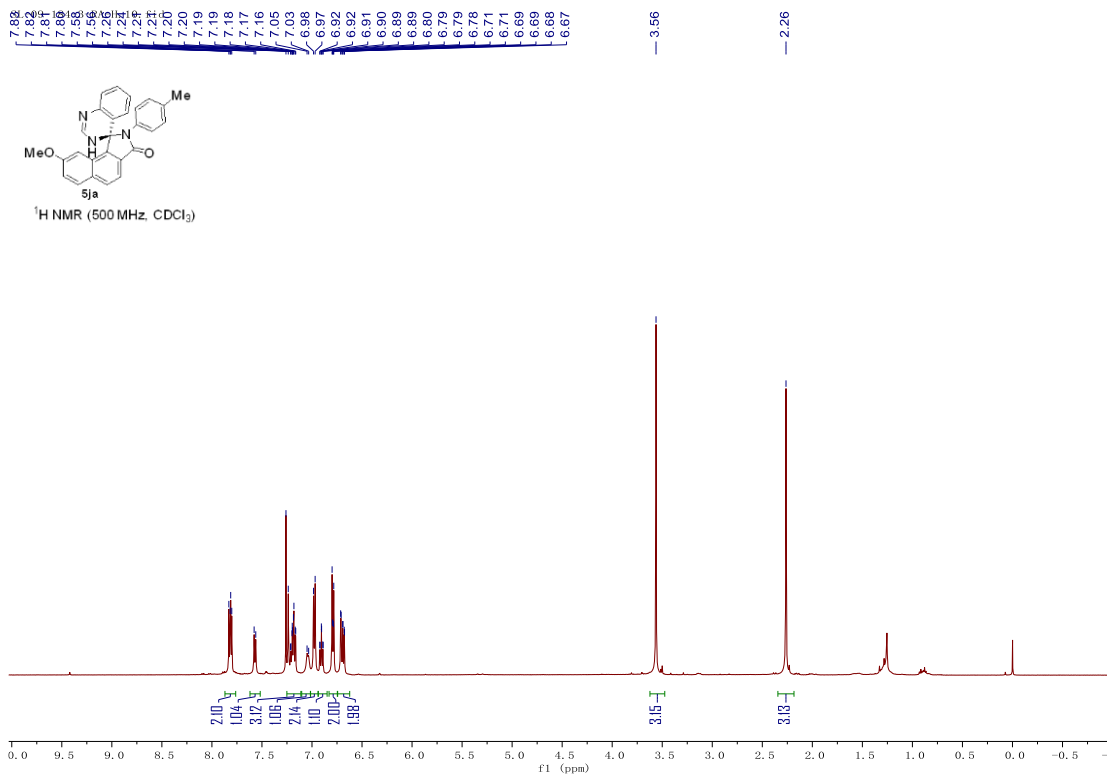

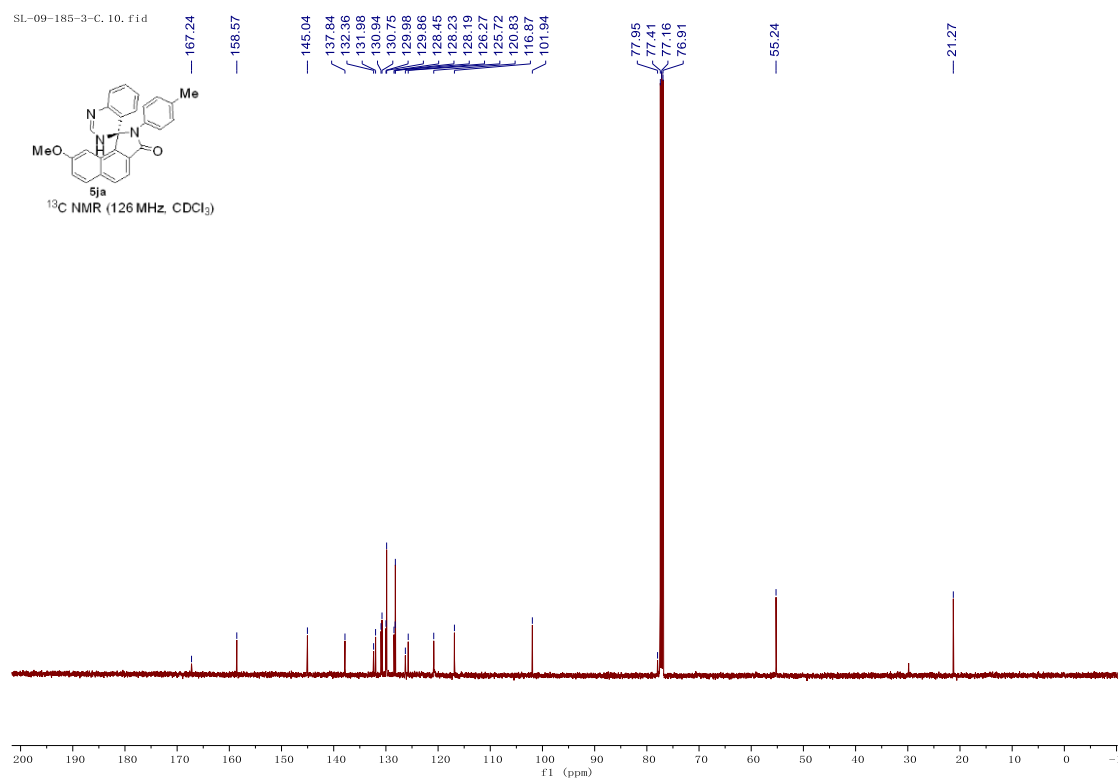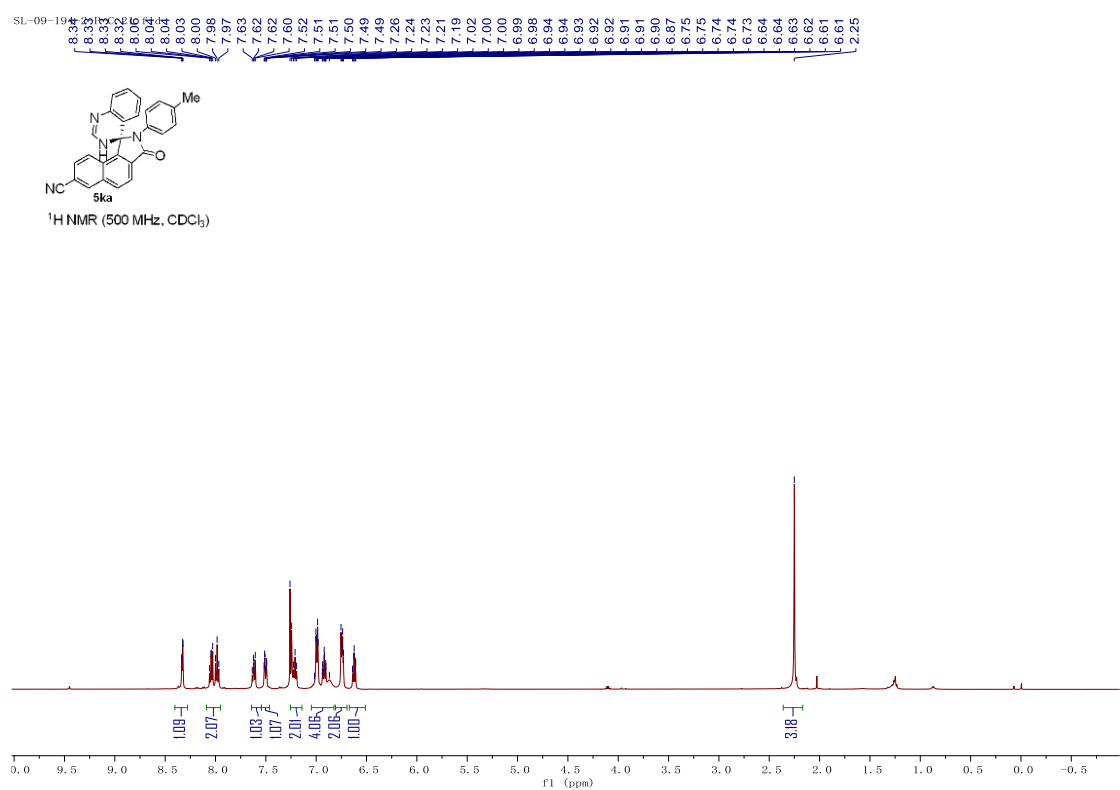

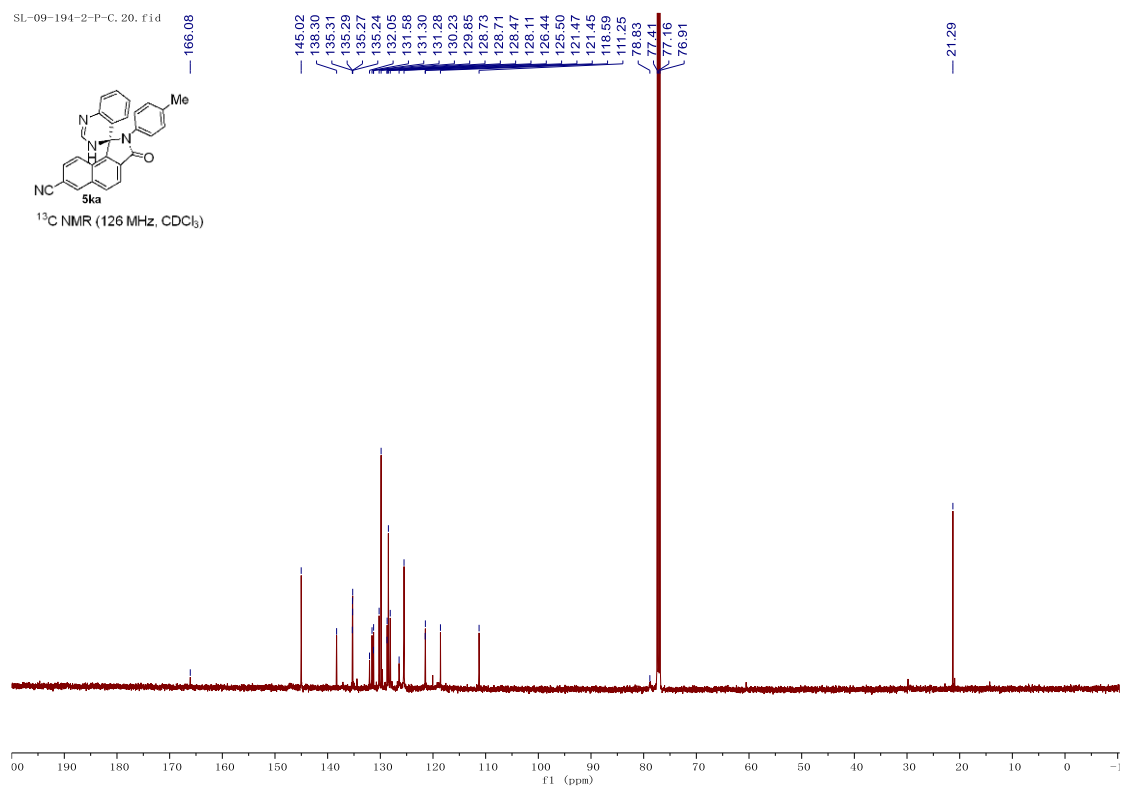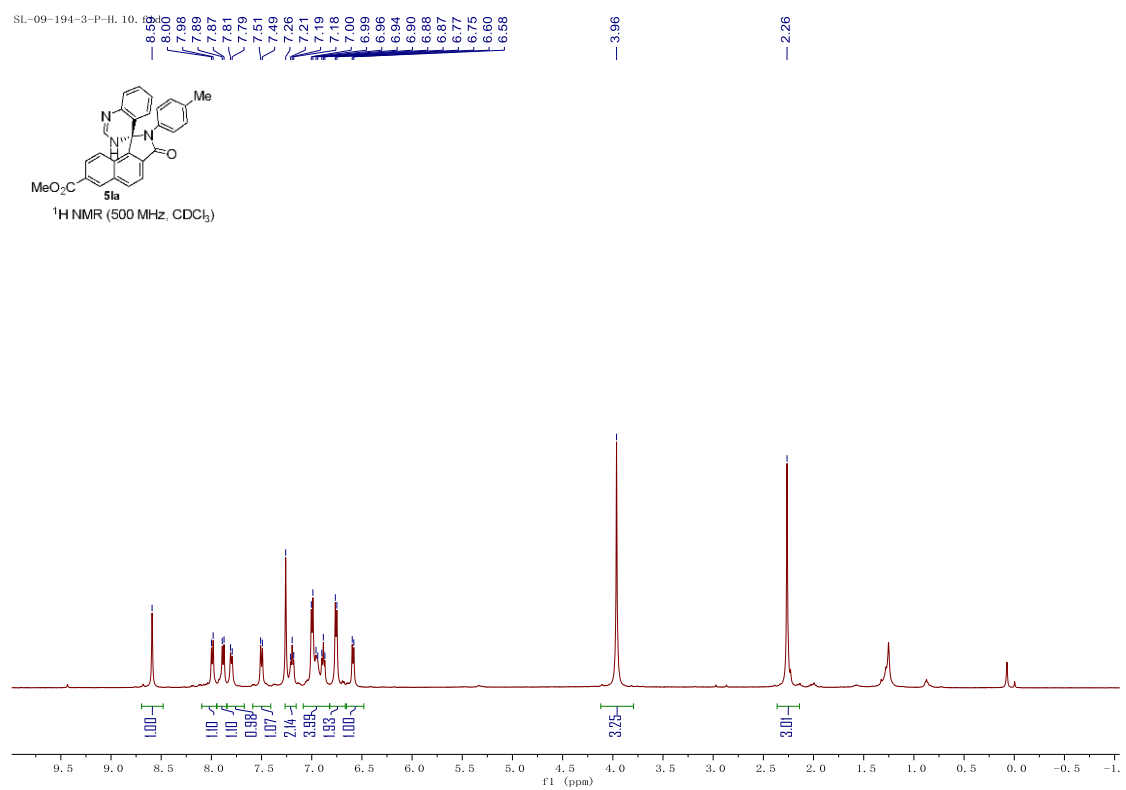



SL-09-194-3-P-C, 10, f1d

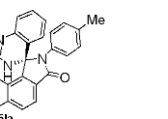

**5la**

$^{13}\text{C}$  NMR (126 MHz,  $\text{CDCl}_3$ )



166.74  
166.43

146.37  
145.07  
138.20  
135.61  
132.58  
132.36  
131.99  
130.42  
130.10  
129.88  
129.57  
129.25  
128.96  
128.45  
126.97  
126.21  
125.55  
124.35  
120.13

78.41  
77.41  
77.16  
76.91

52.65

21.29

f1 (ppm)

[illegible]

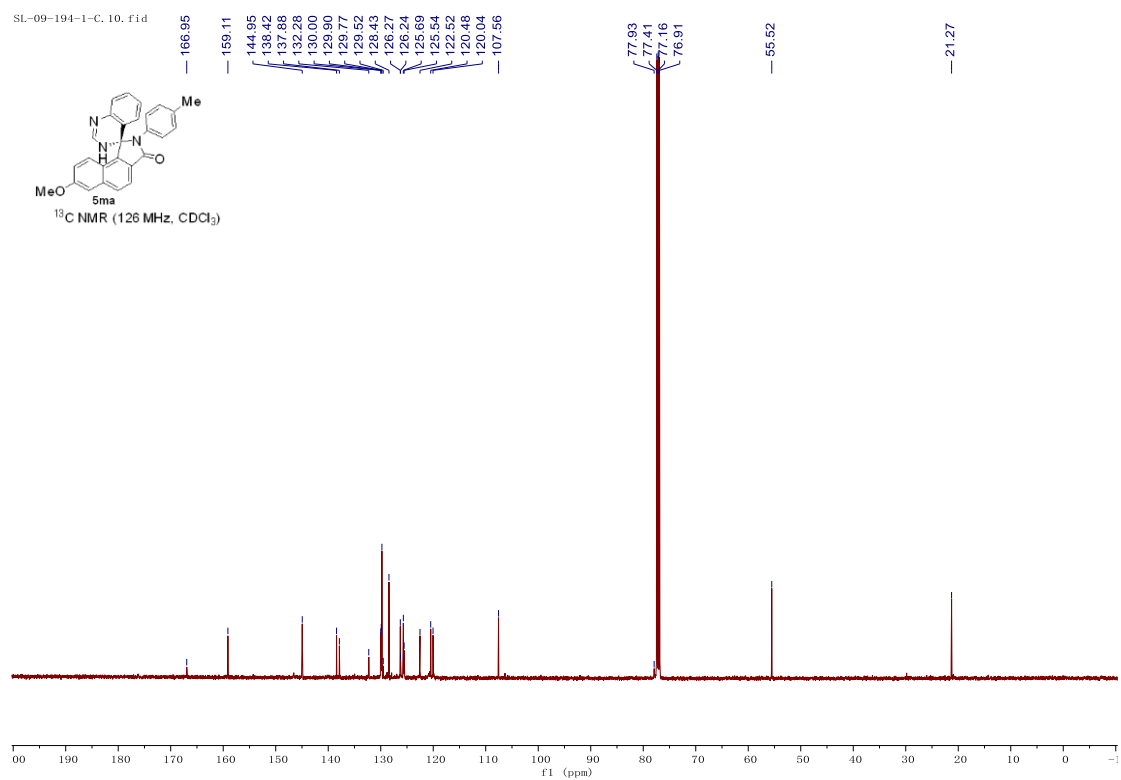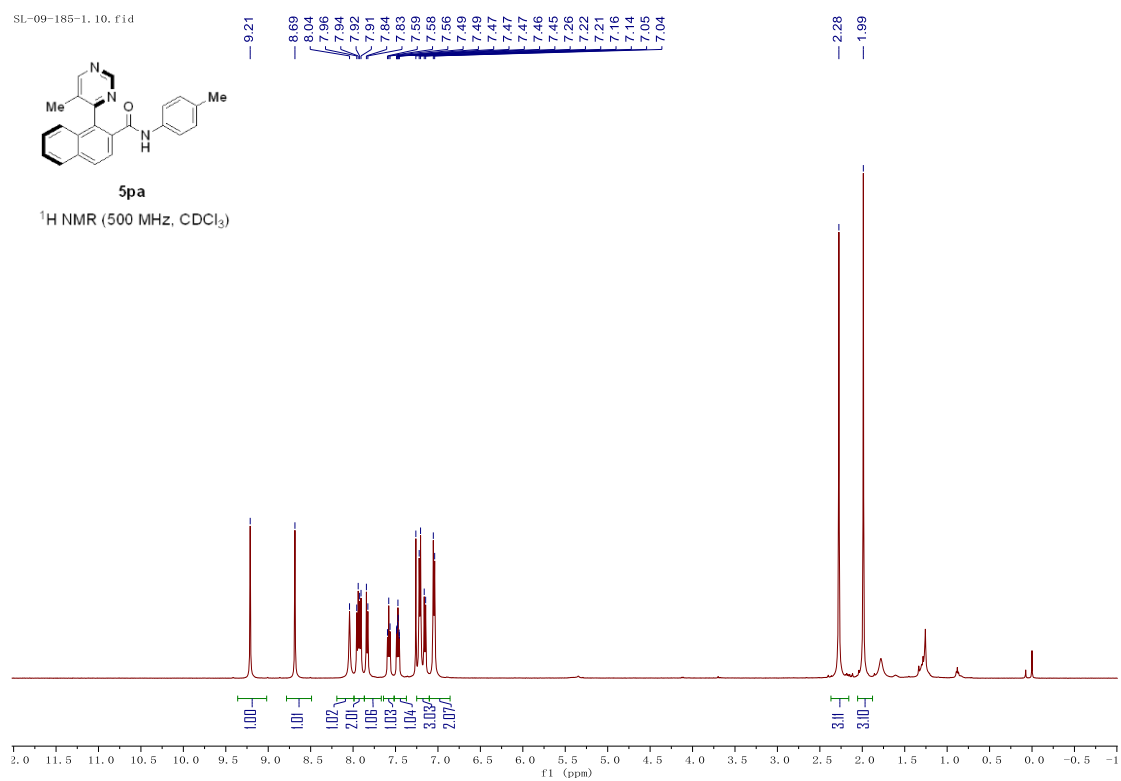

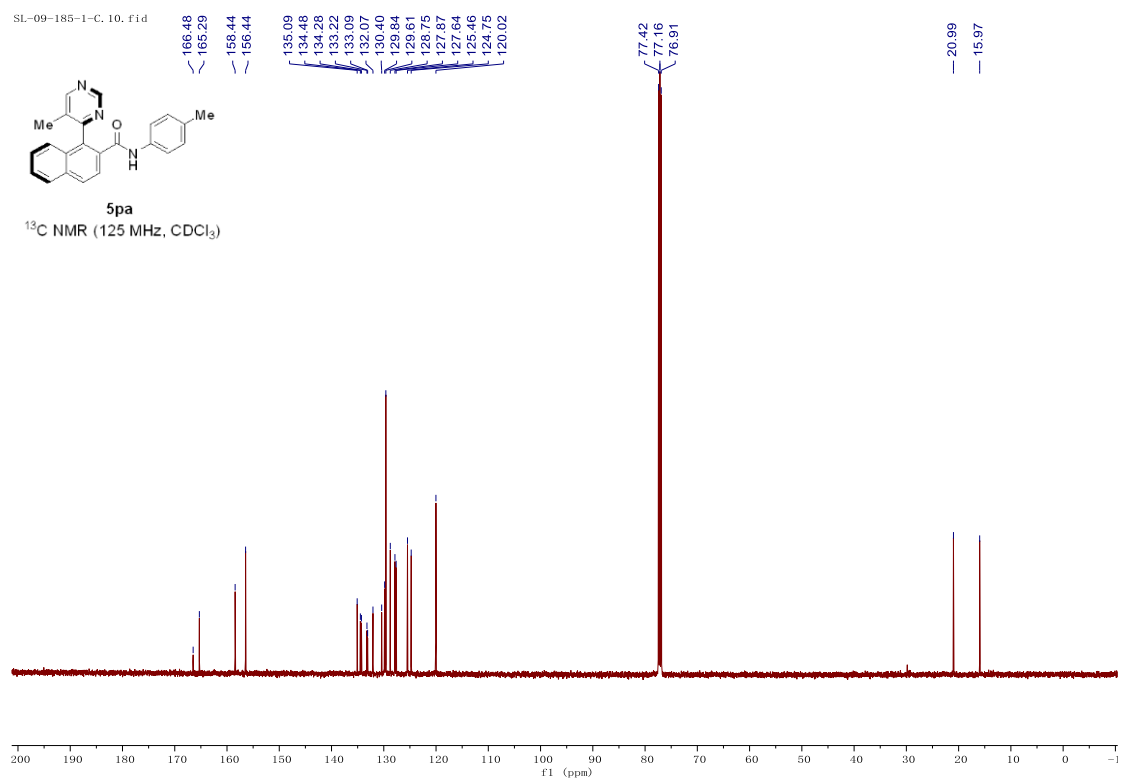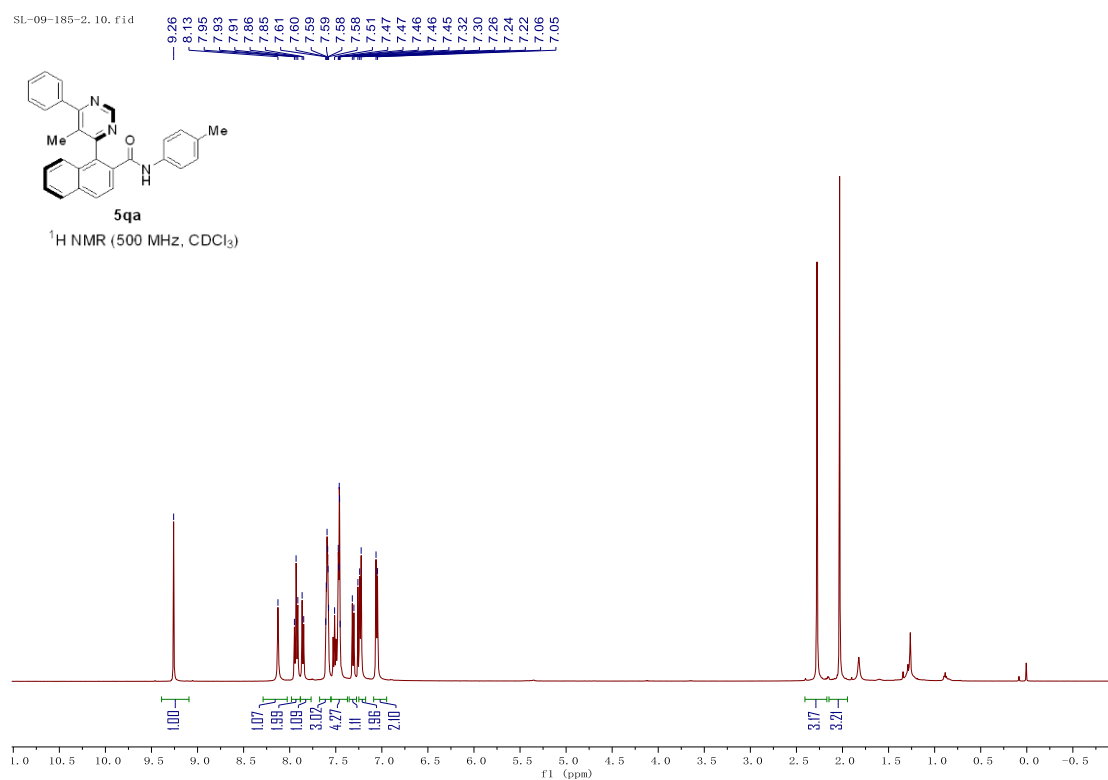

SL-09-185-2-C, 10, f1d

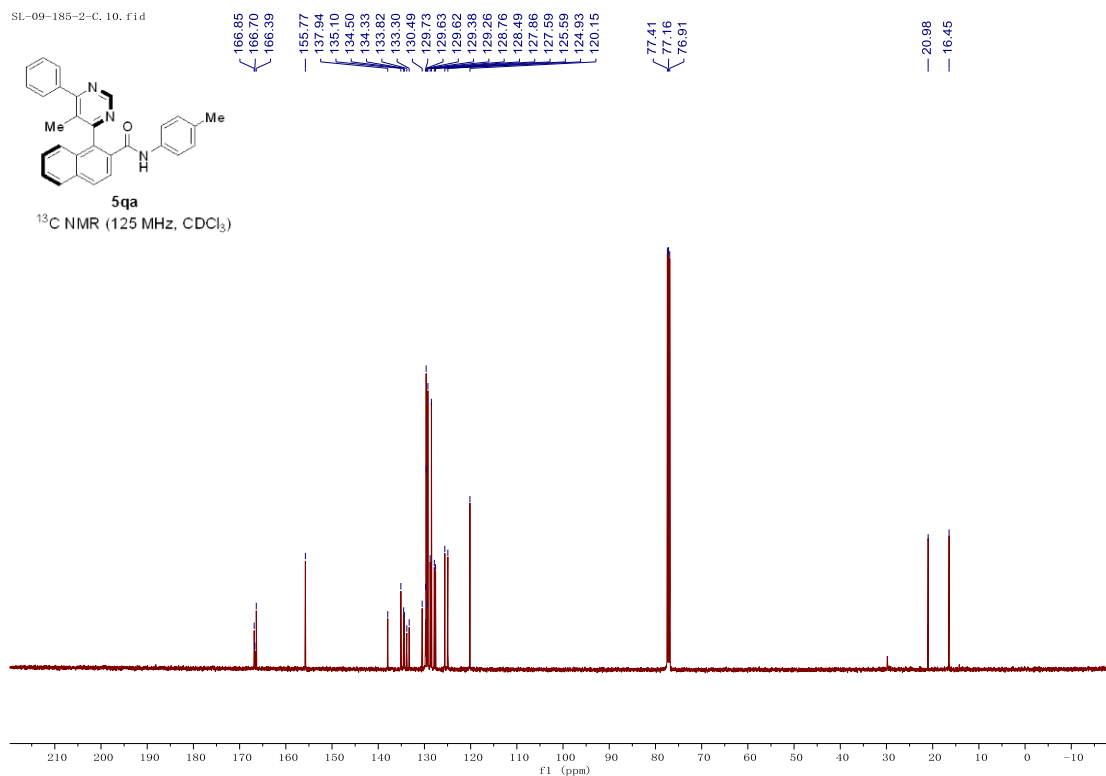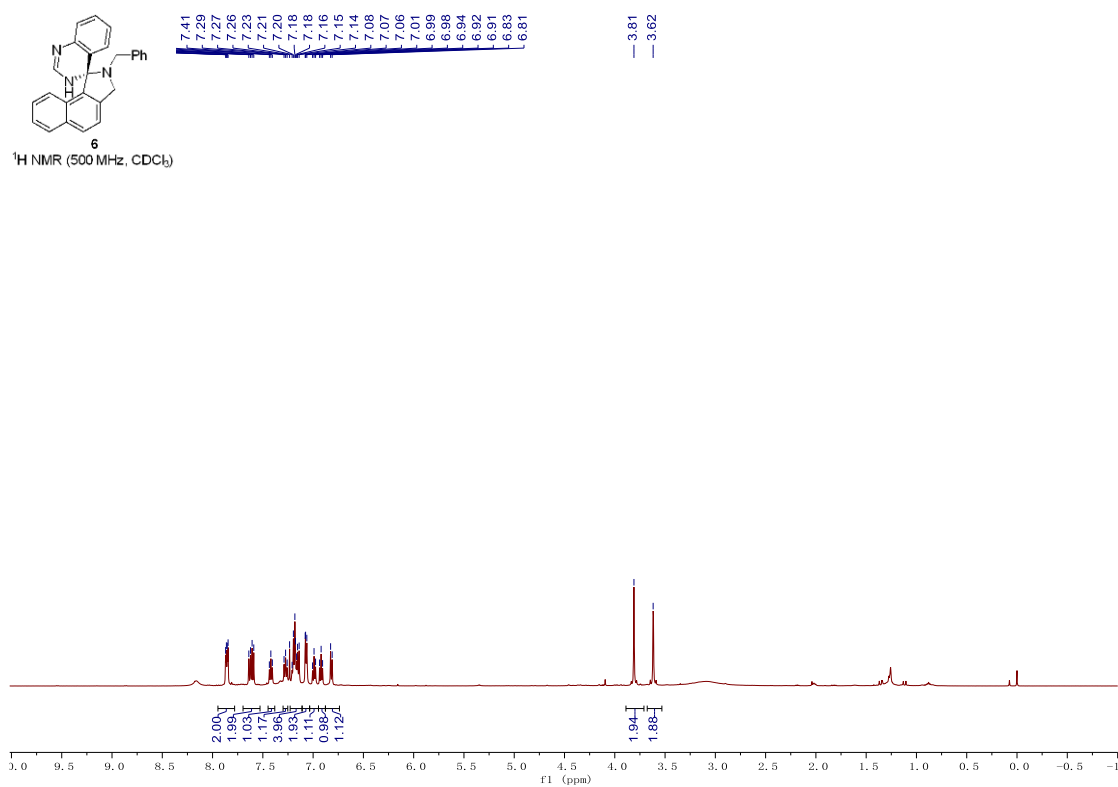

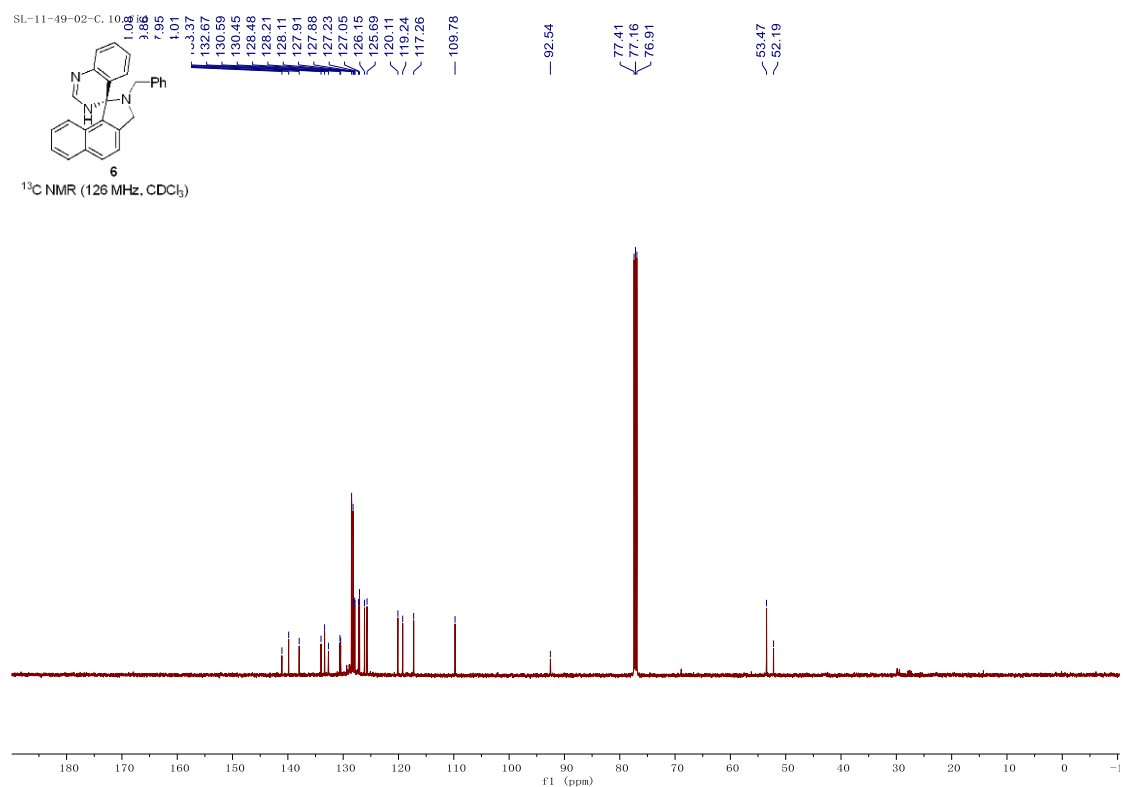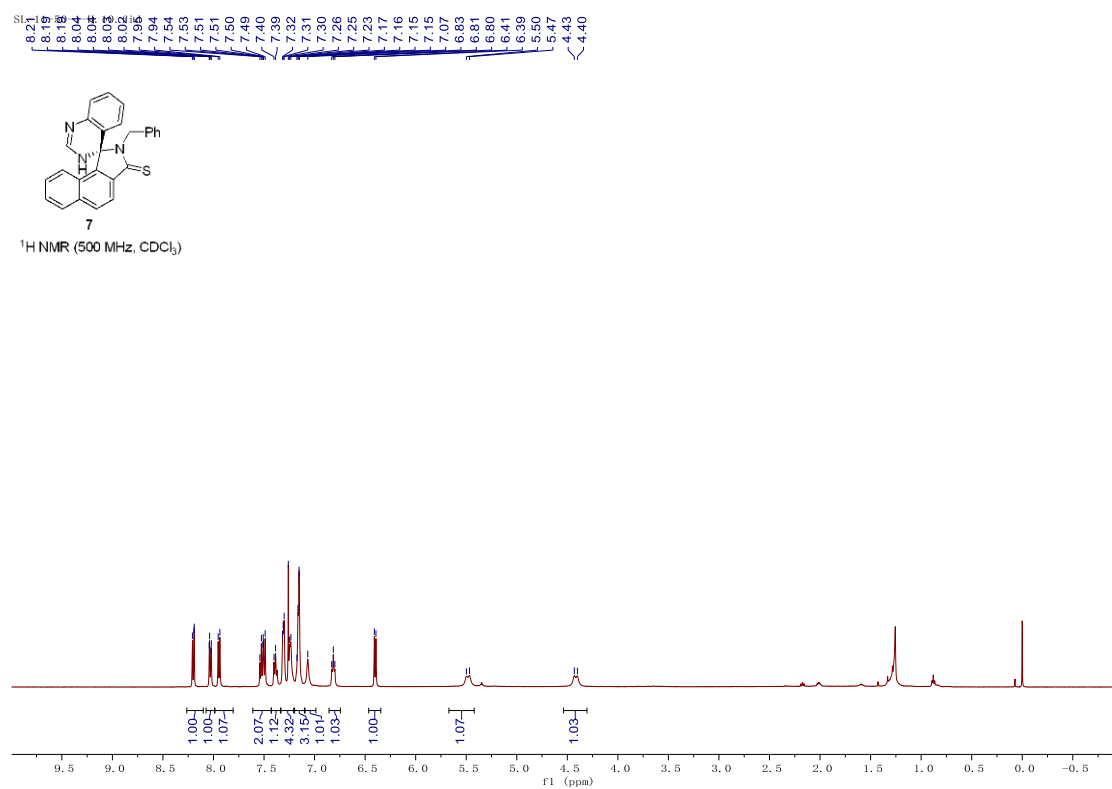

SL-11-50-01-C-S, 10.00 fid

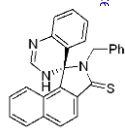

<sup>13</sup>C NMR (126 MHz, CDCl<sub>3</sub>)

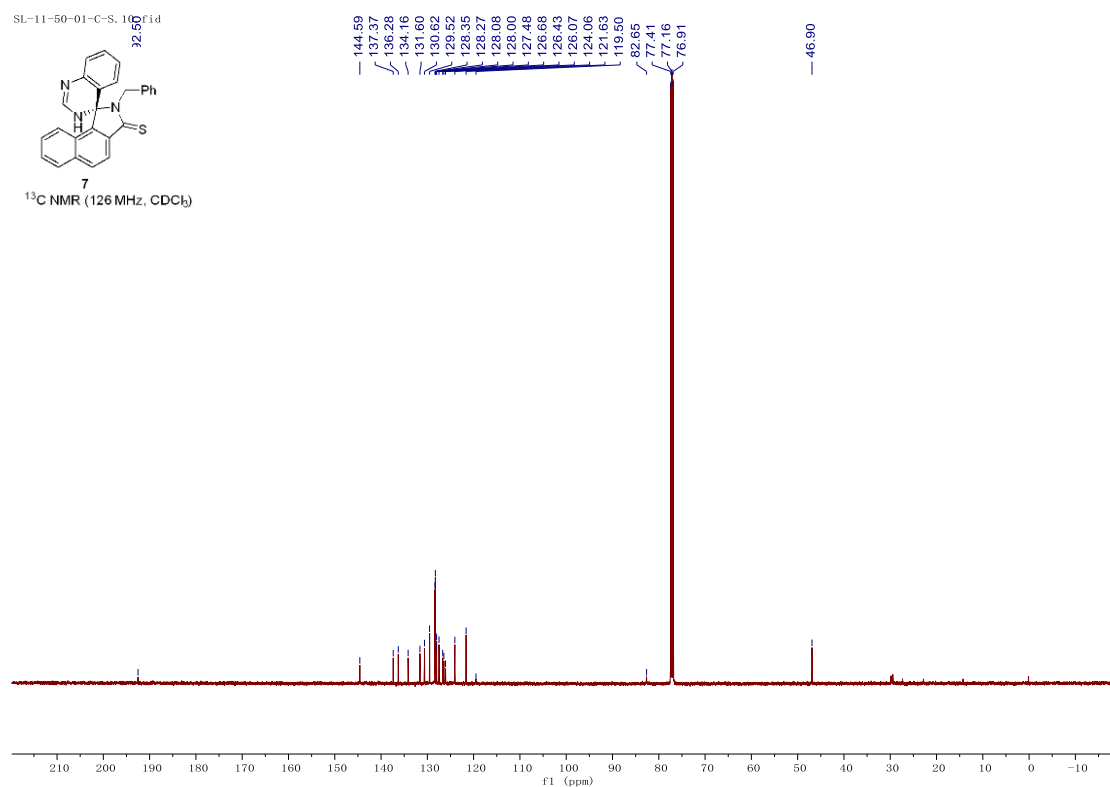

SL-11-82-01-Me-HC, 10.00 fid

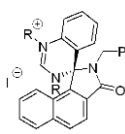

<sup>1</sup>H NMR (500 MHz, CDCl<sub>3</sub>)

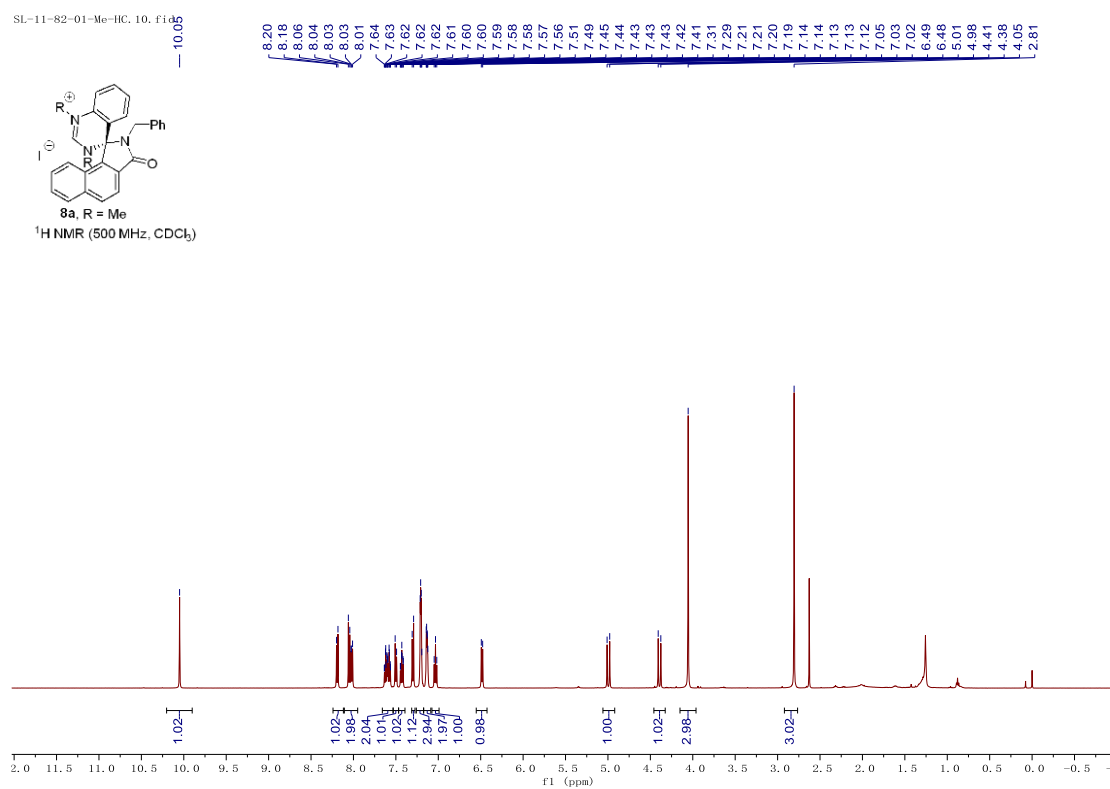

SL-11-82-01-Me-HC, 11, f1d

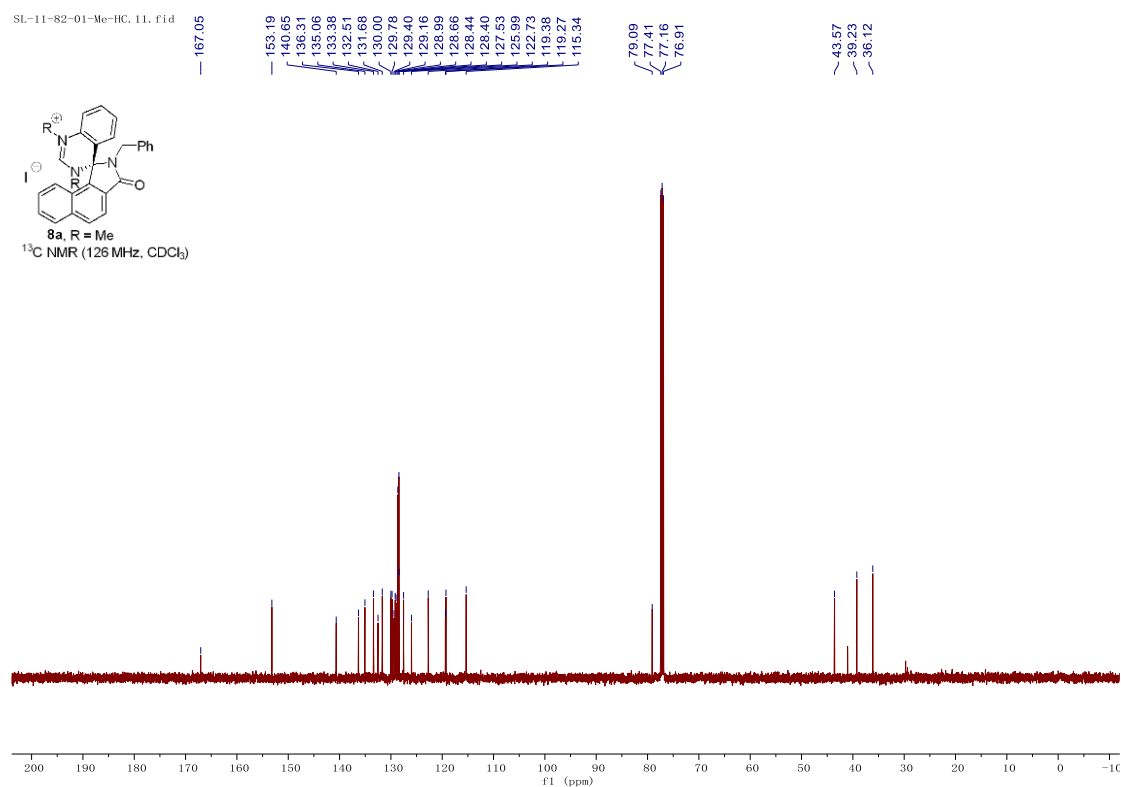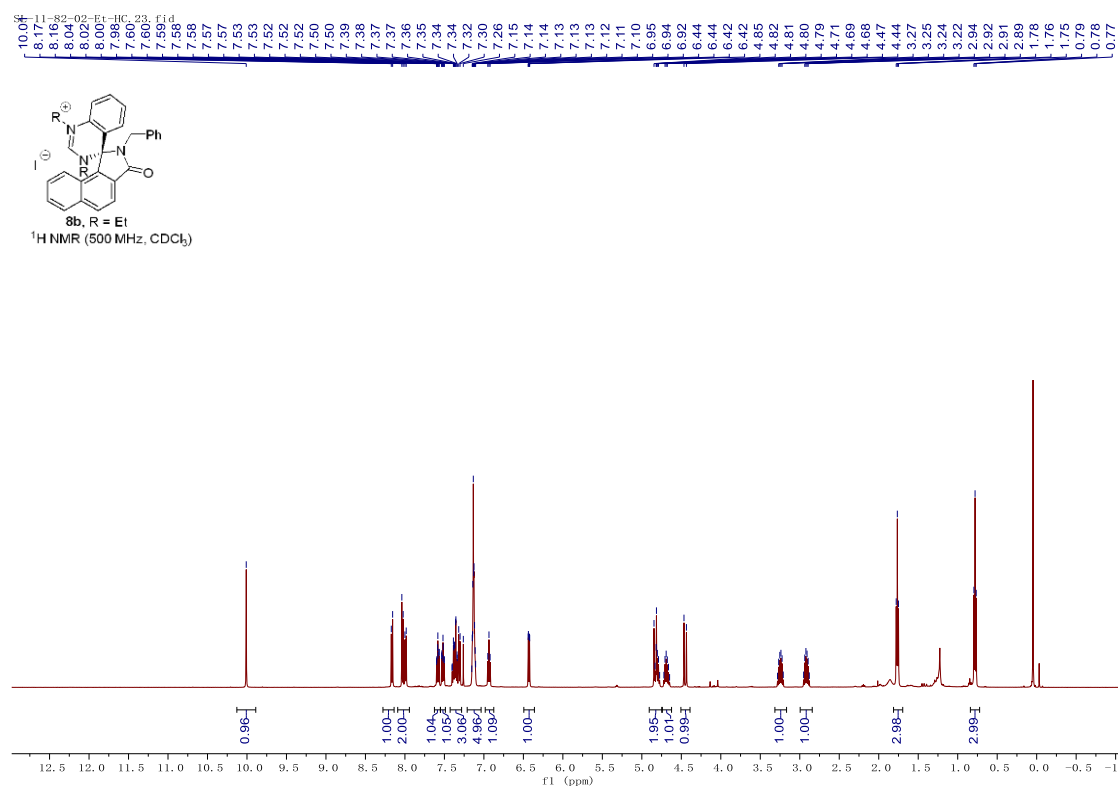

SL-11-82-02-Et-HC, 22, fid

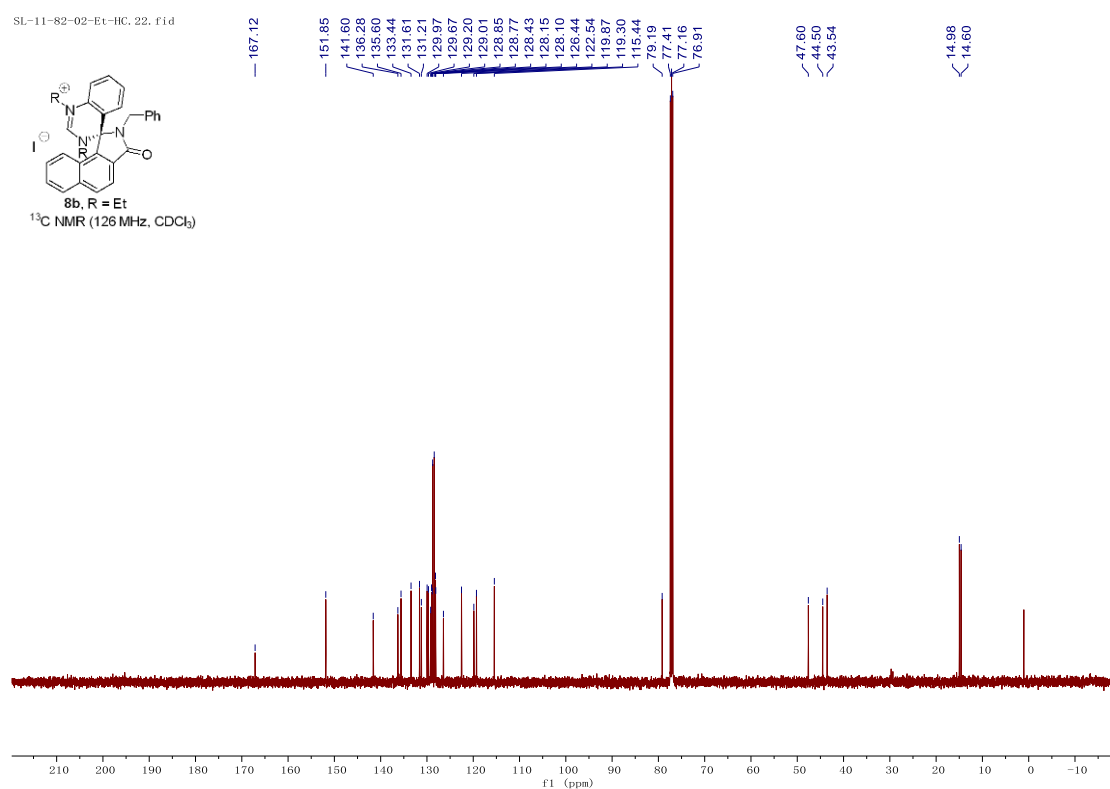

SL-12-41-MeOTf-HC, 100, fid

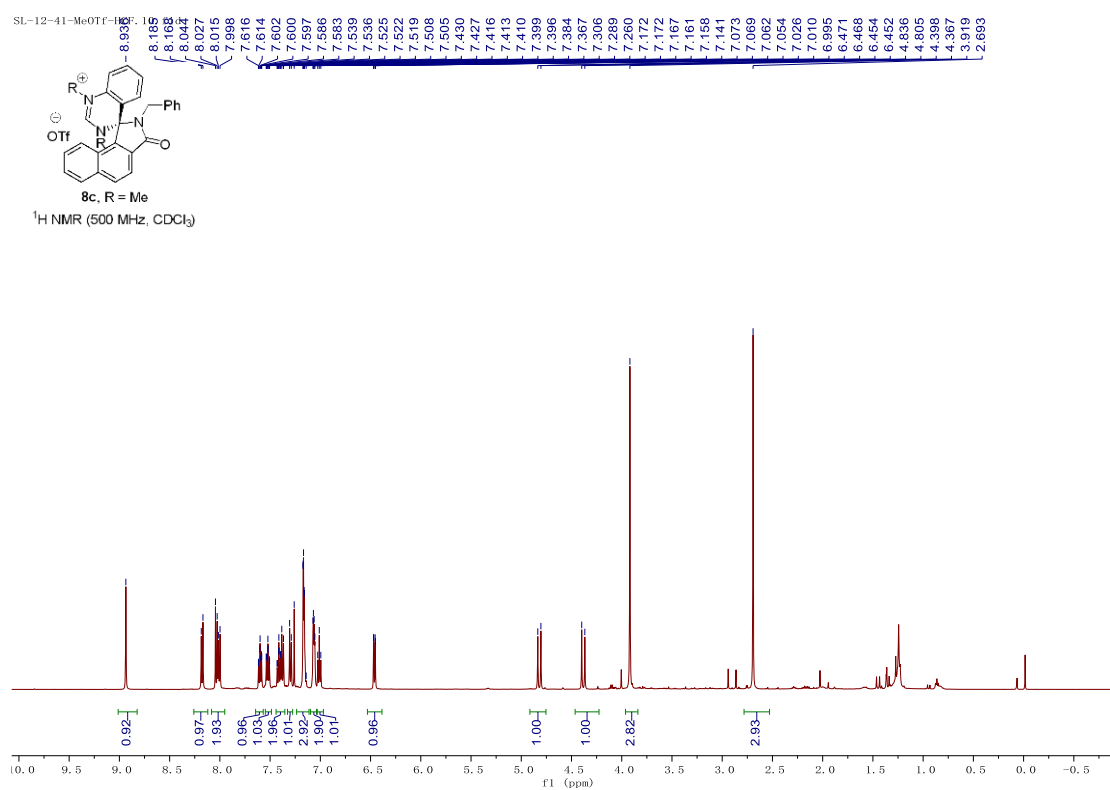



SL-12-41-MeOTf-HCF, 12, f1d

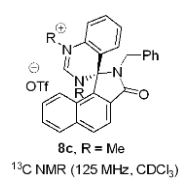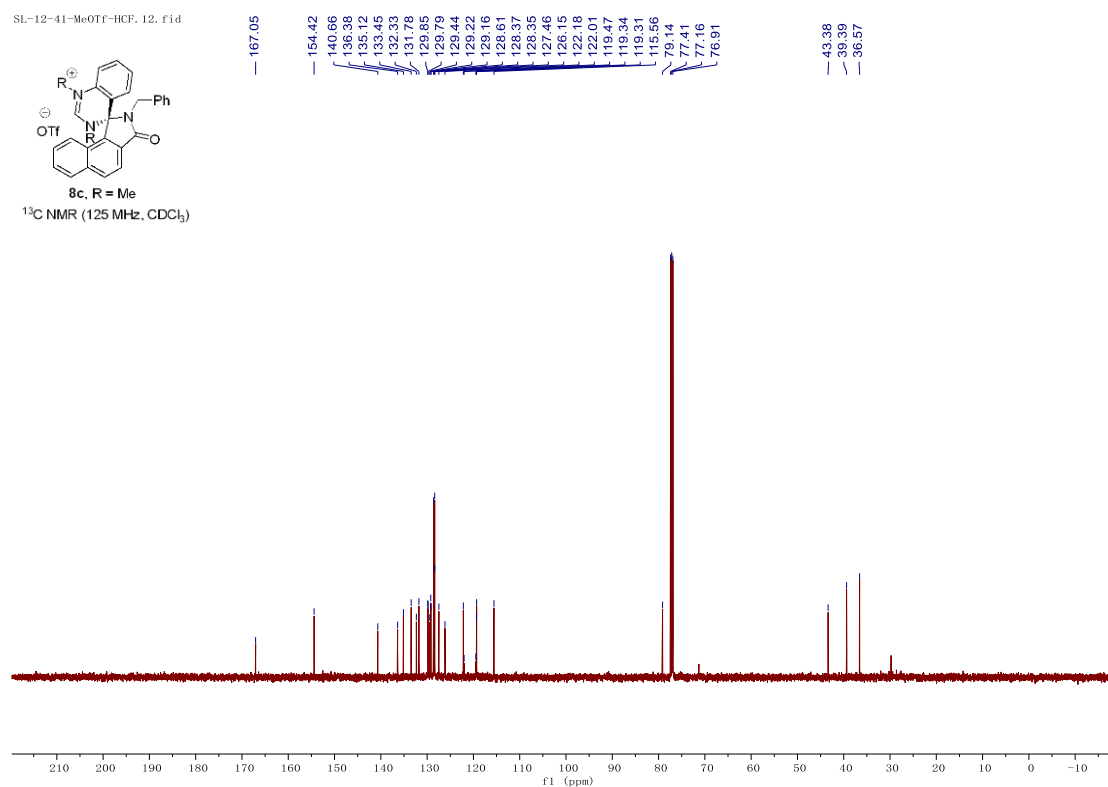

SL-12-41-MeOTf-HCF, 11, f1d

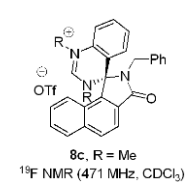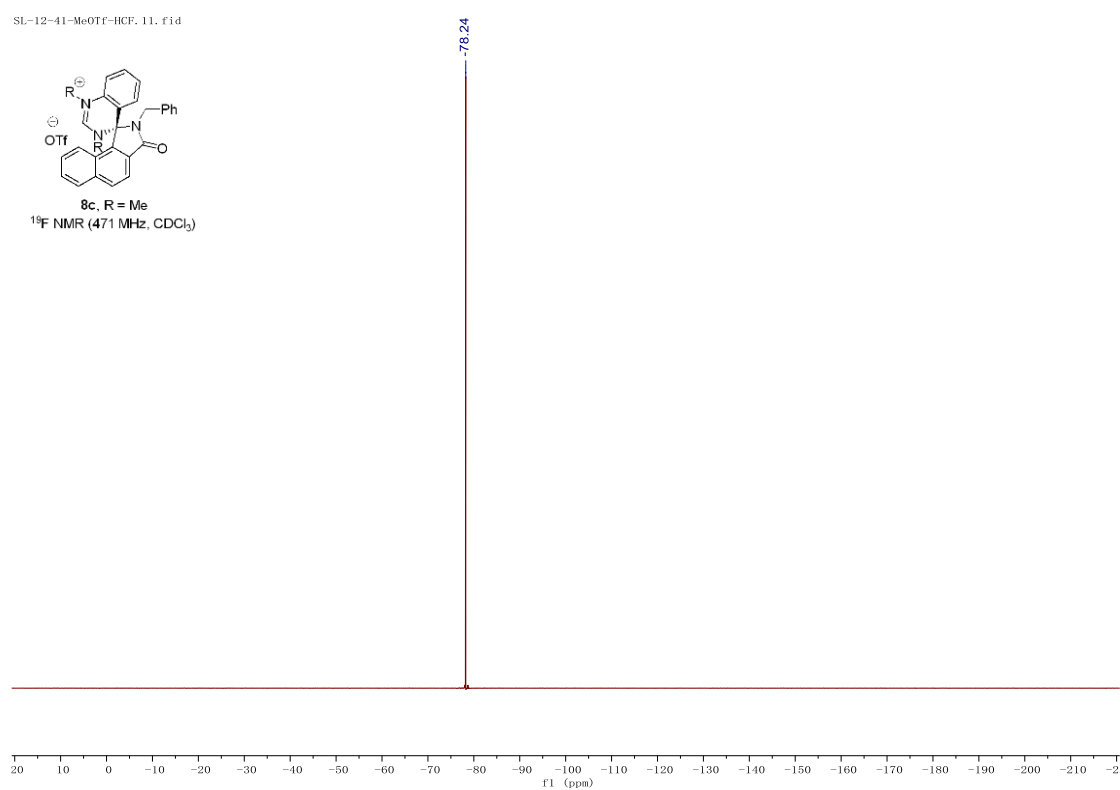

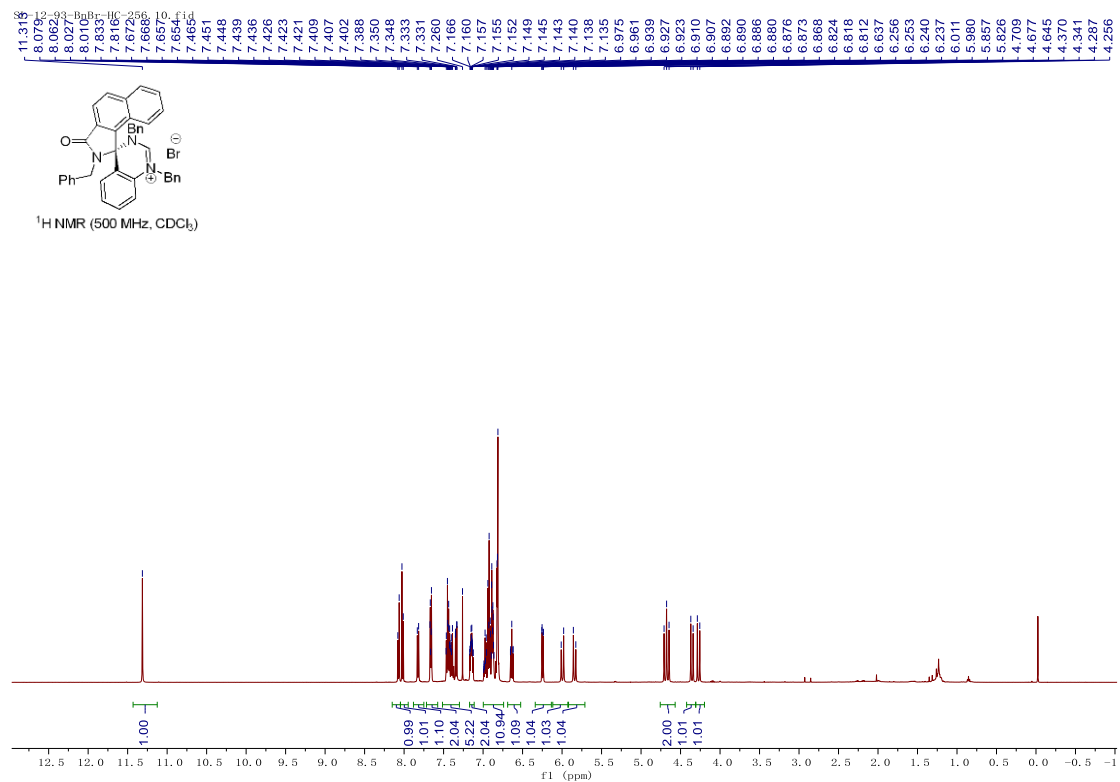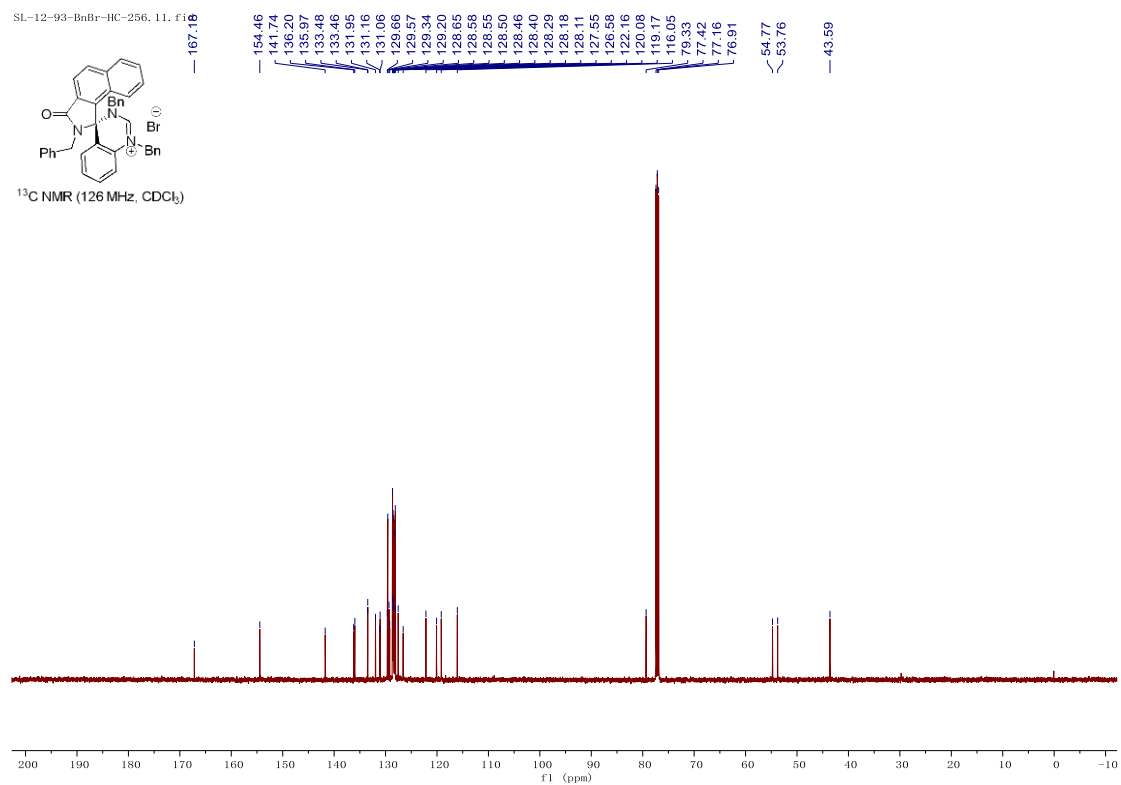

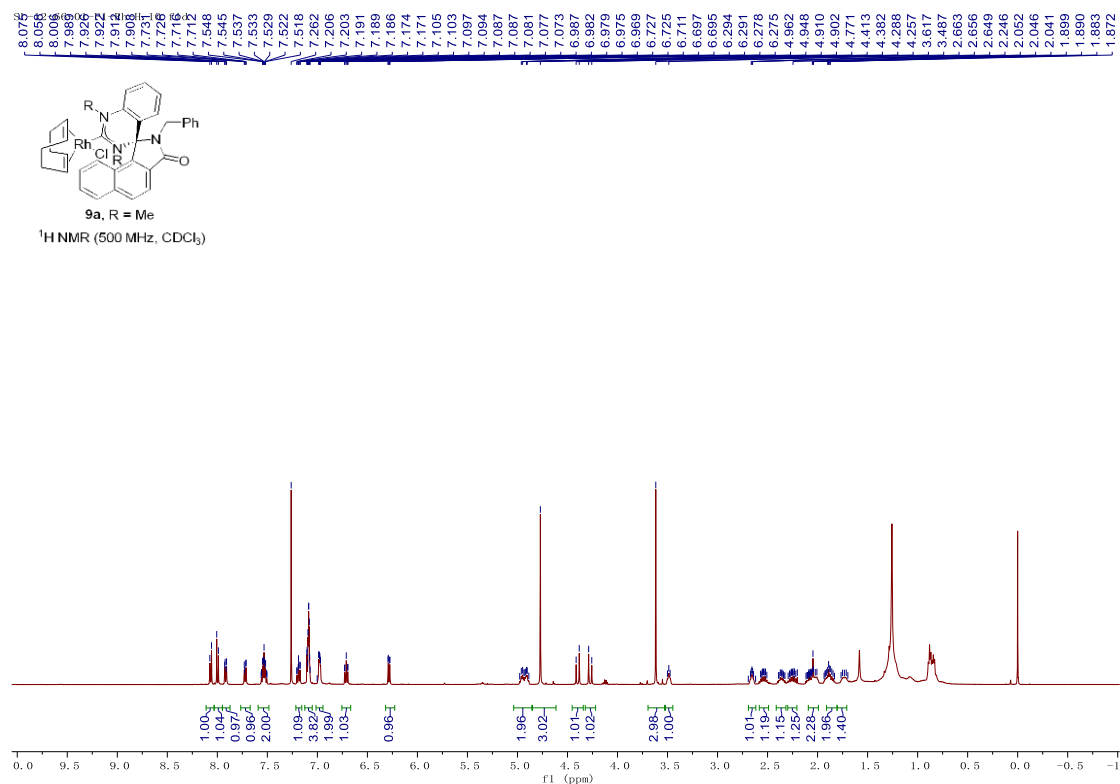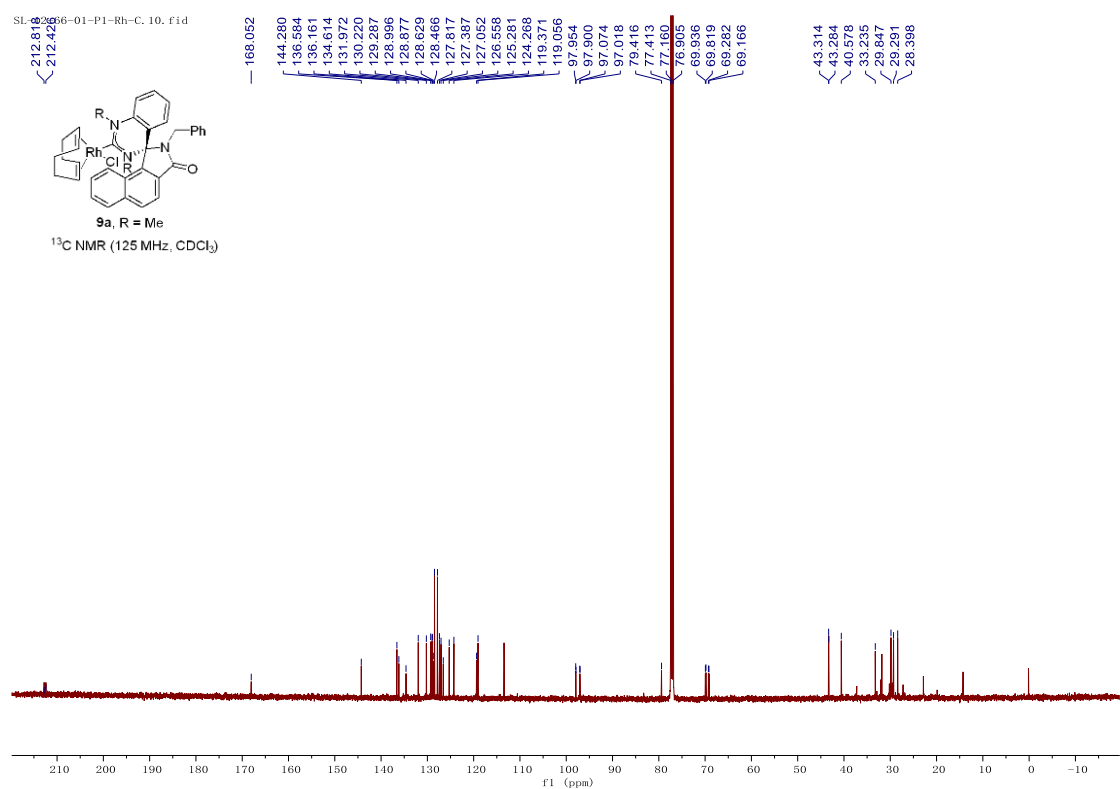

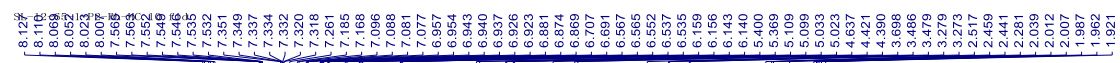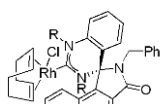

9b, R = Me  
<sup>1</sup>H NMR (500 MHz, CDCl<sub>3</sub>)

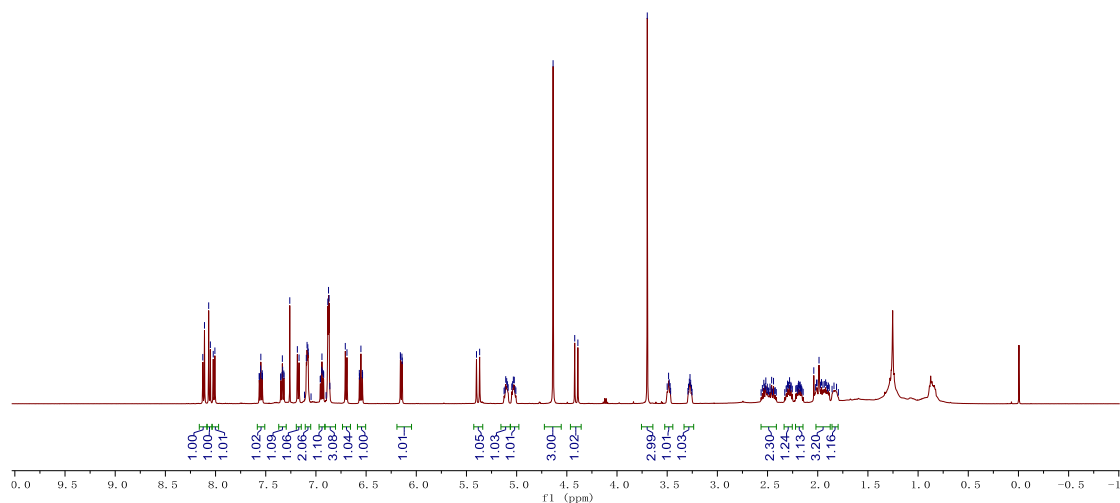

SL165-1-P2-Rh-IC, 11, f1d

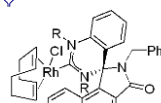

9b, R = Me  
<sup>13</sup>C NMR (125 MHz, CDCl<sub>3</sub>)

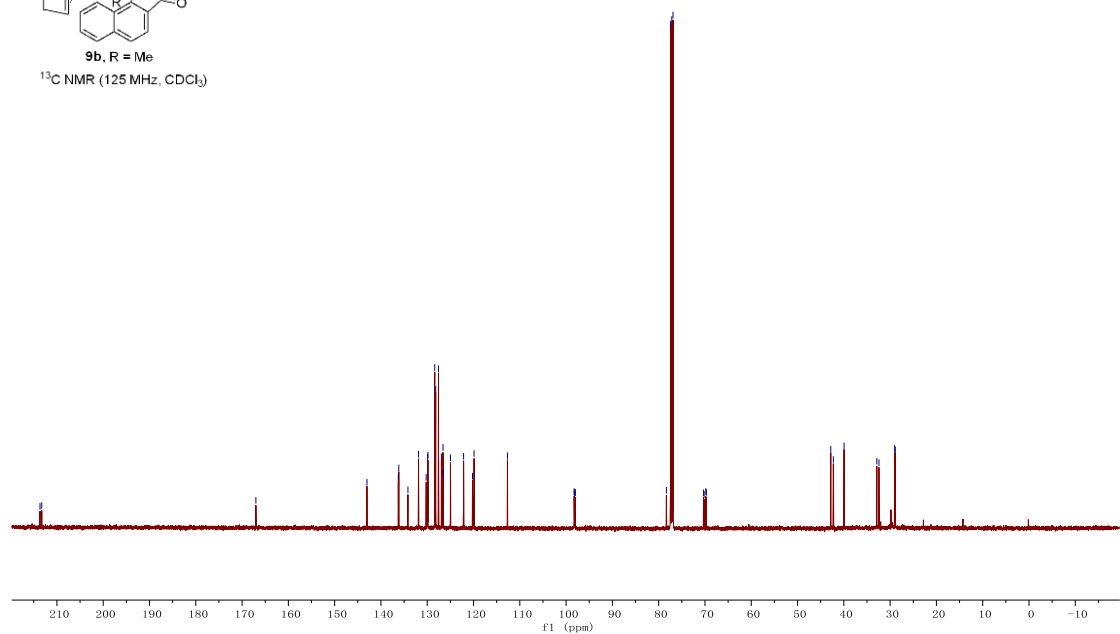

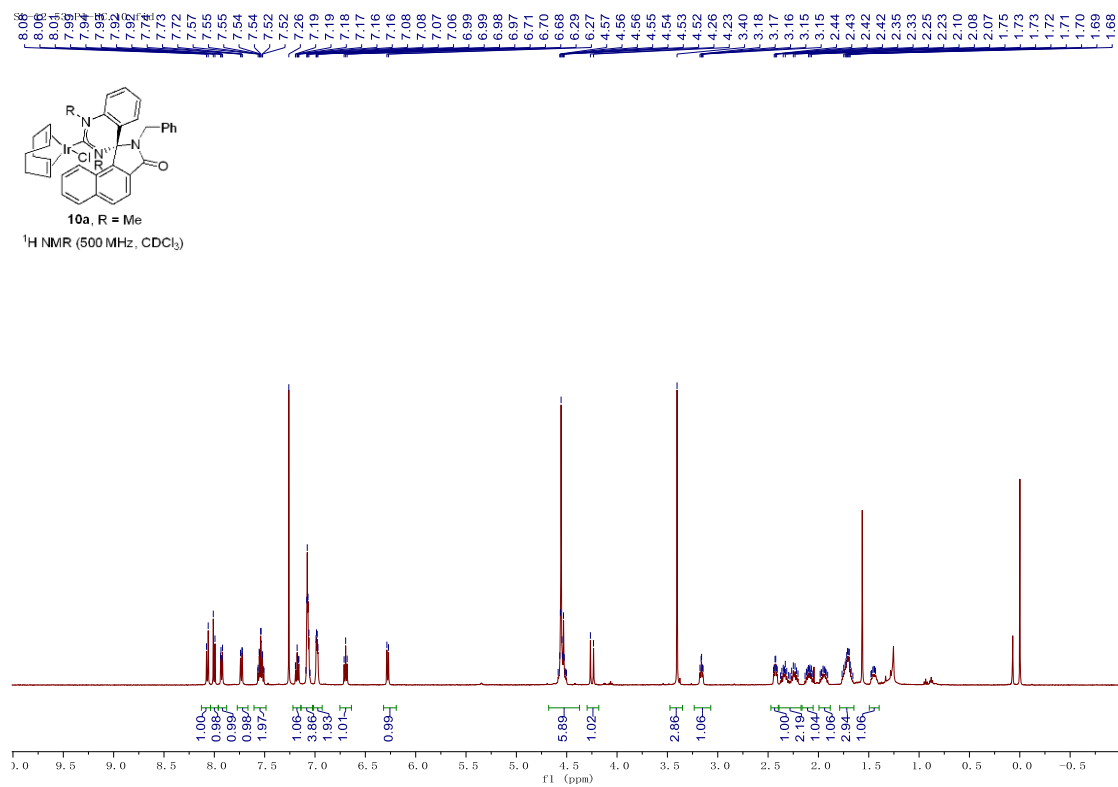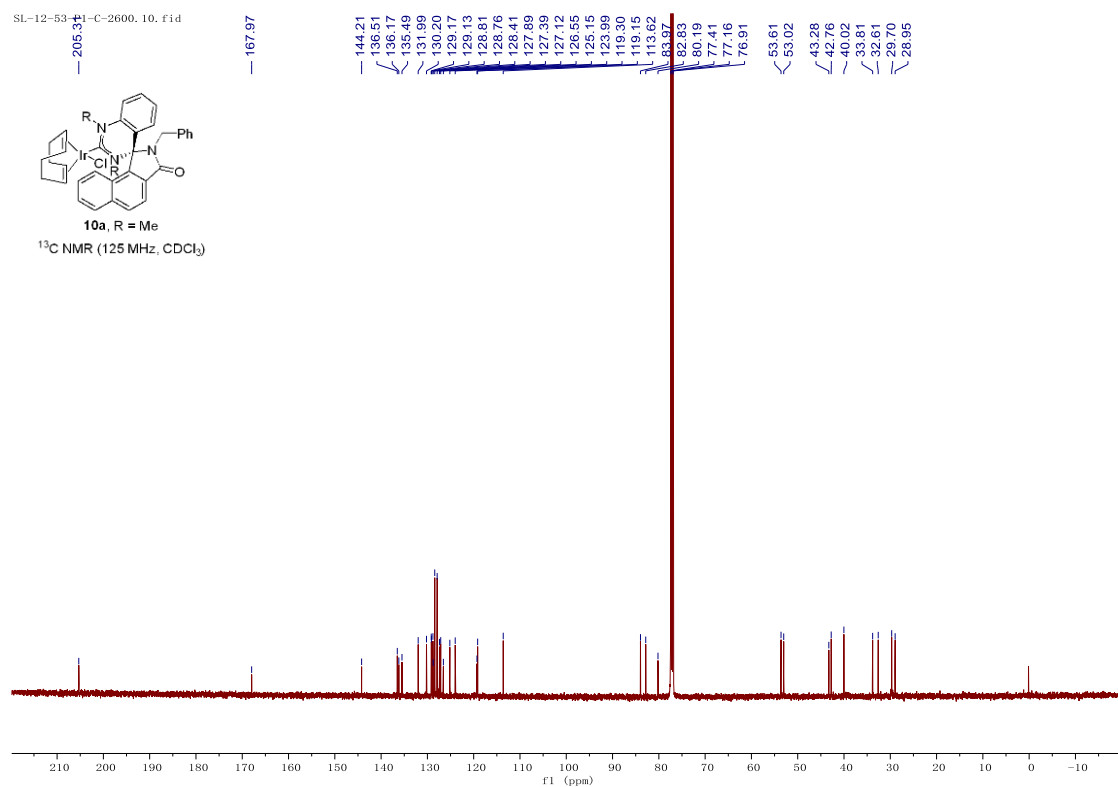

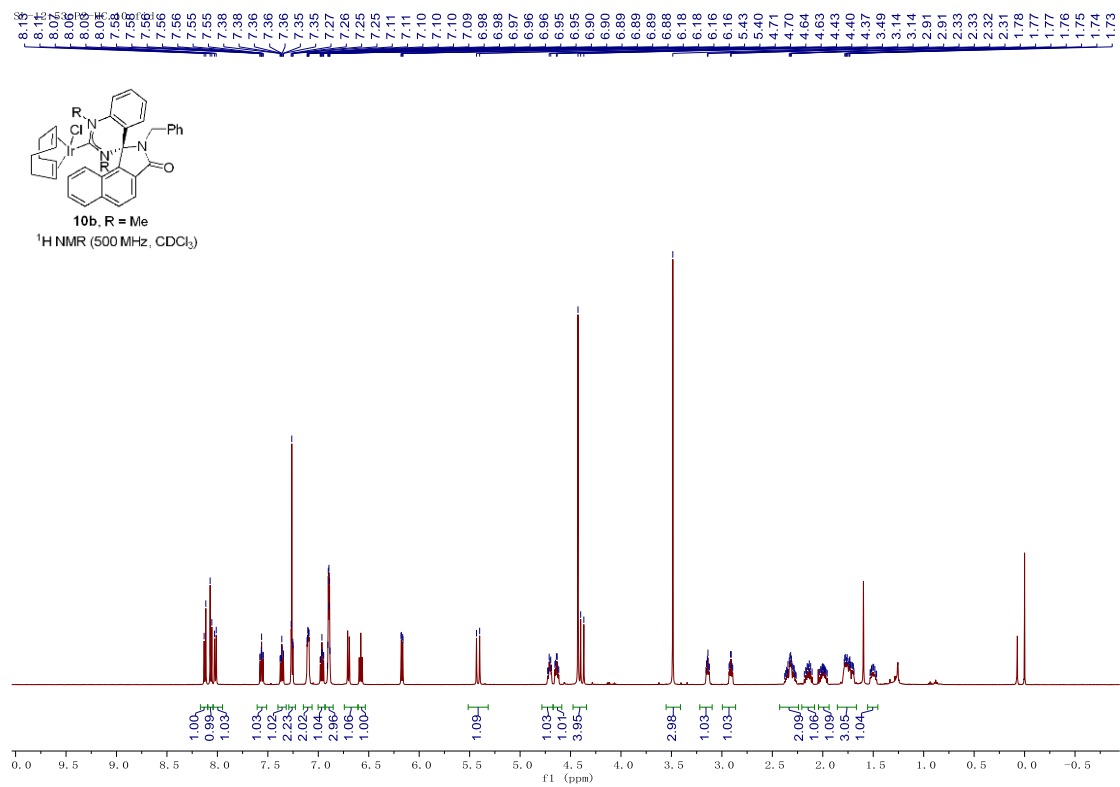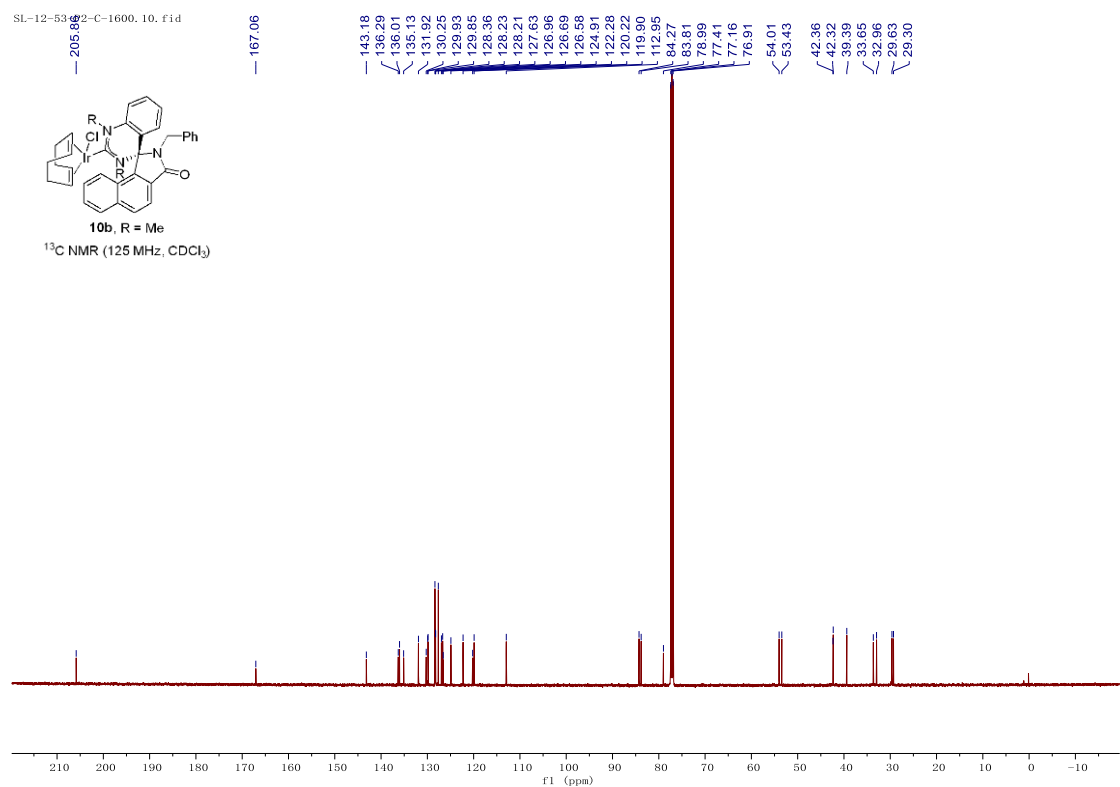

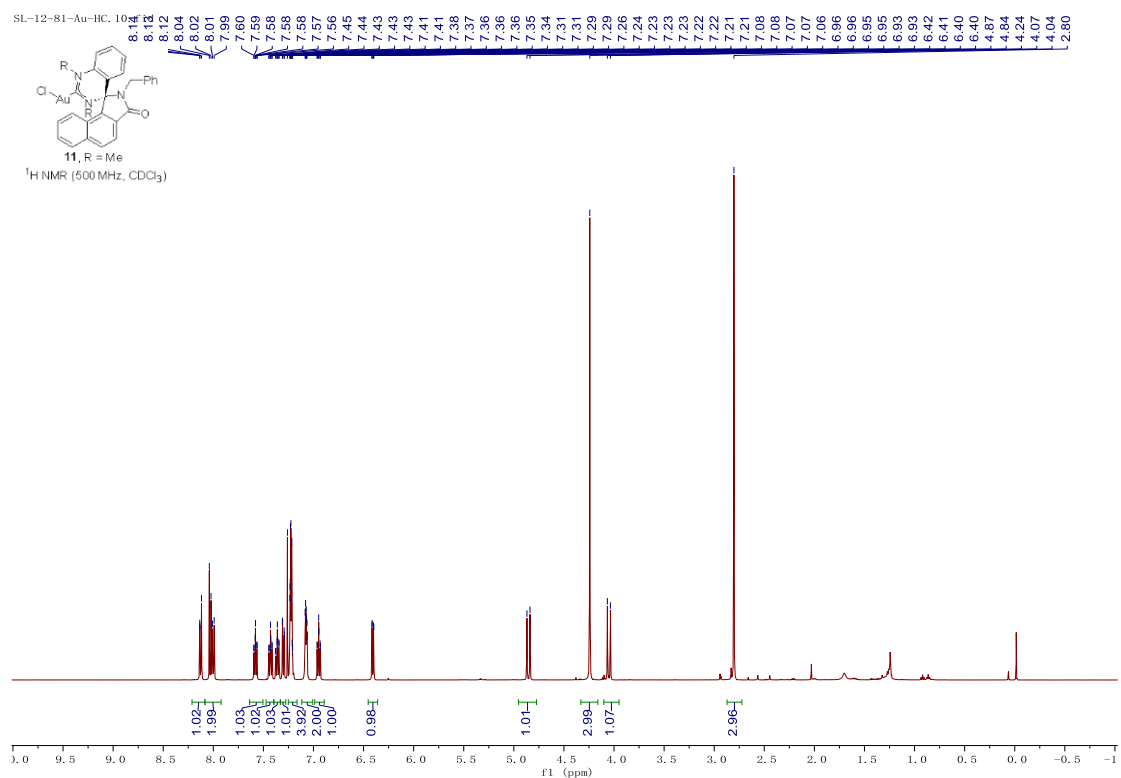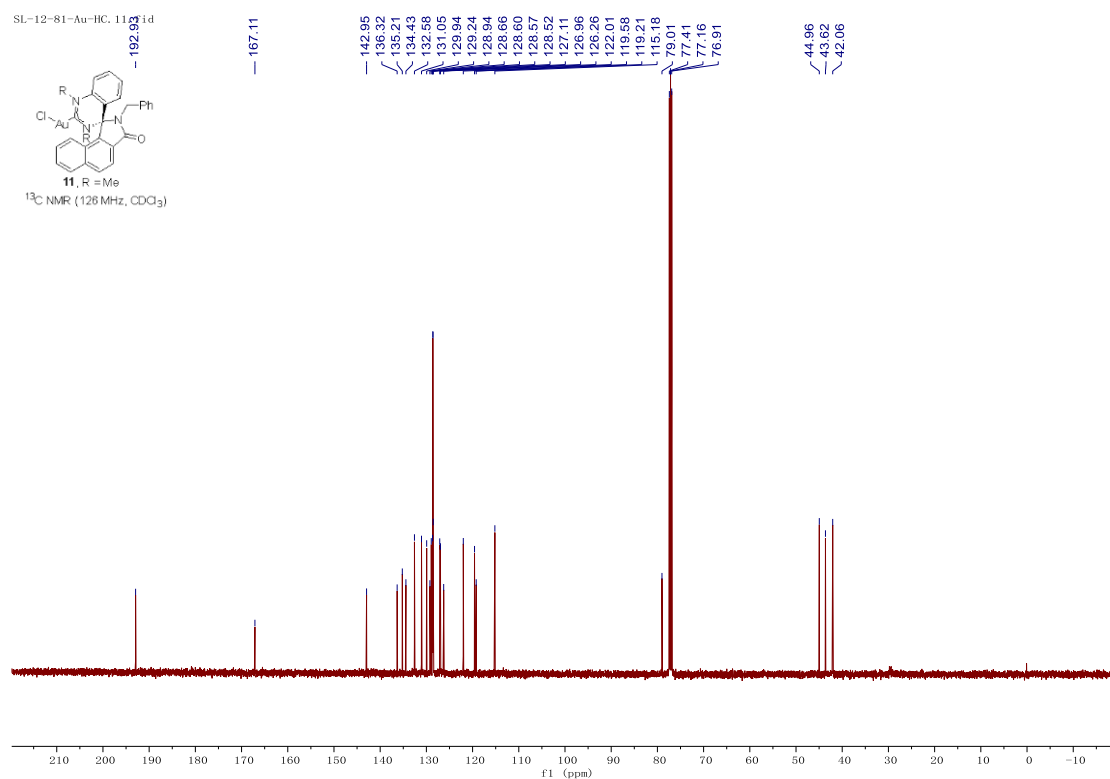

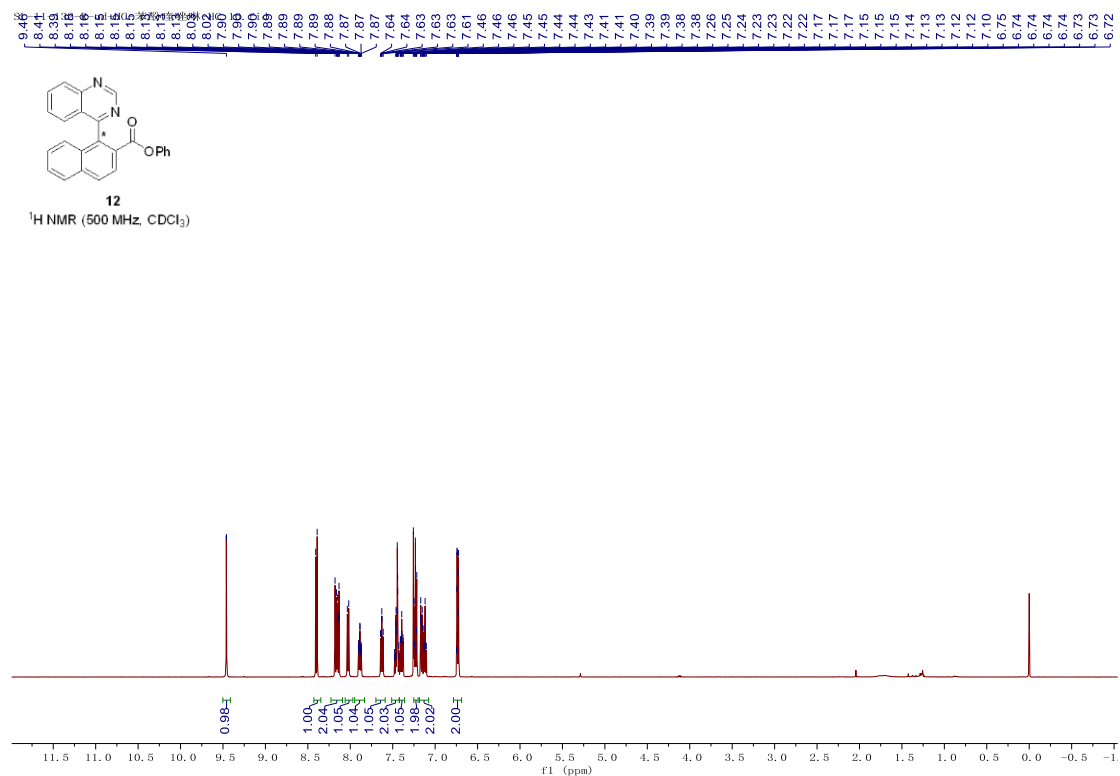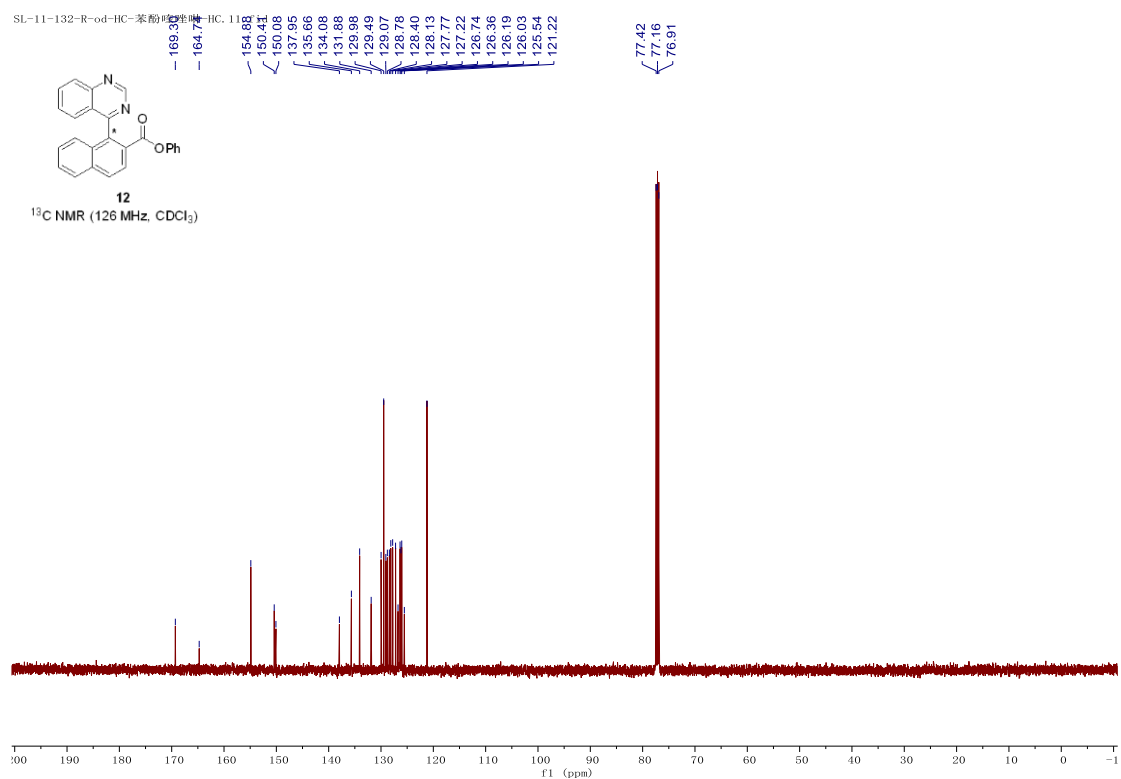





## HPLC Chromatograms

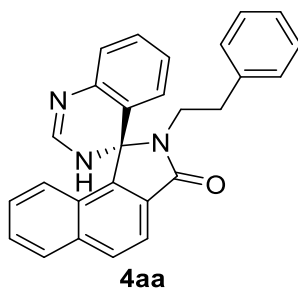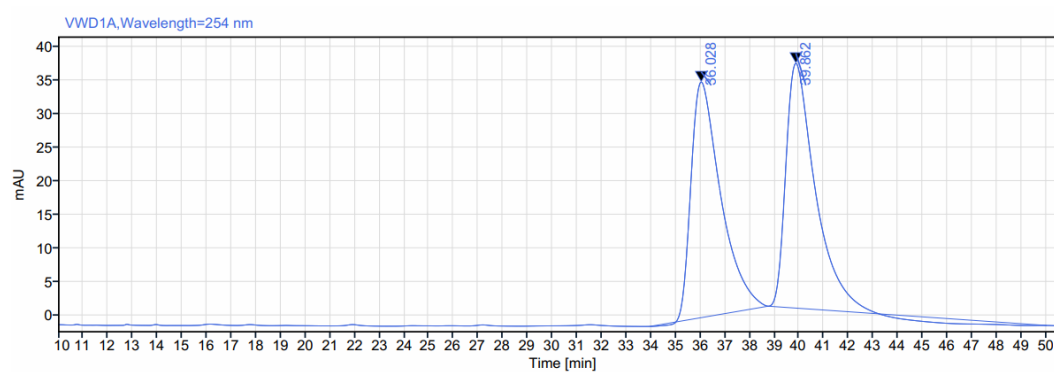

Signal: VWD1A,Wavelength=254 nm

| RT [min] | Type | Width [min] | Area    | Height | Area% | Name |
|----------|------|-------------|---------|--------|-------|------|
| 36.028   | MM m | 4.79        | 2934.09 | 35.11  | 50.54 |      |
| 39.862   | MM m | 11.29       | 2871.19 | 36.47  | 49.46 |      |
| Sum      |      |             | 5805.28 |        |       |      |

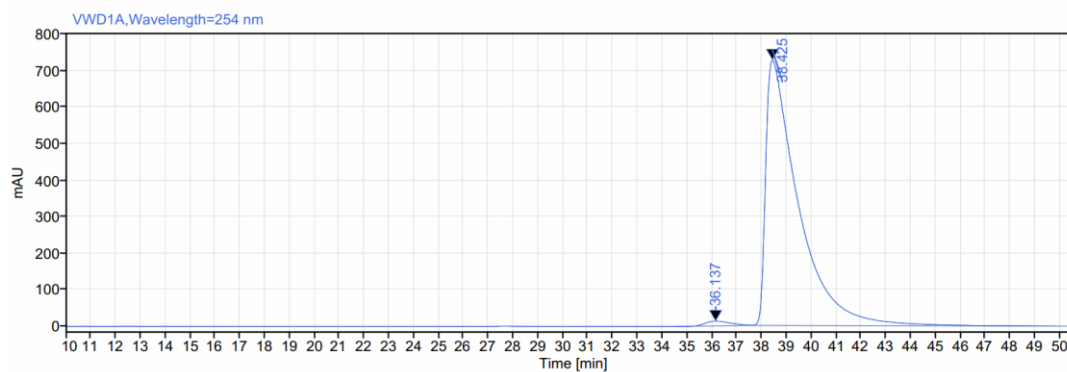

Signal: VWD1A,Wavelength=254 nm

| RT [min] | Type | Width [min] | Area     | Height | Area% | Name |
|----------|------|-------------|----------|--------|-------|------|
| 36.137   | MM m | 3.06        | 884.93   | 12.84  | 1.32  |      |
| 38.425   | MM m | 12.16       | 66176.74 | 726.71 | 98.68 |      |
| Sum      |      |             | 67061.67 |        |       |      |

HPLC (Chiralpak IA-3):  $t_R = 38.43$  (major), 36.14 (minor)

Condition: 90:10, *n*-Hexane:*i*-PrOH, flow rate 0.7 mL/min, 25 °C, 254 nm.

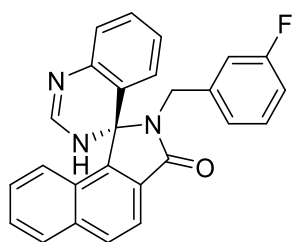

**4ab**

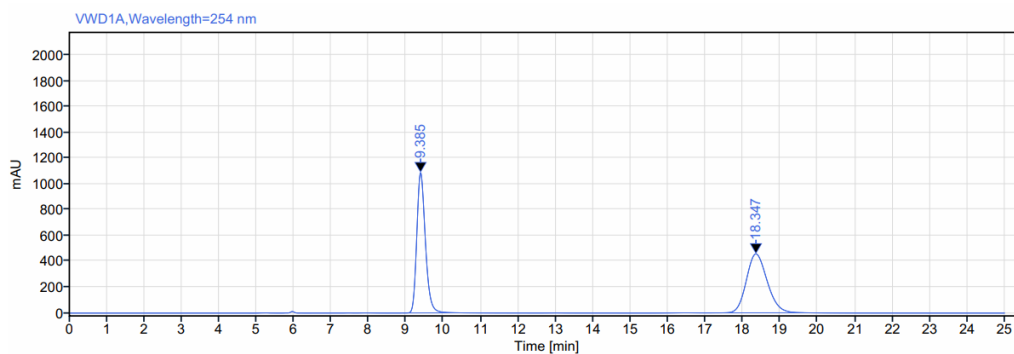

Signal: VWD1A,Wavelength=254 nm

| RT [min] | Type | Width [min] | Area     | Height  | Area% | Name |
|----------|------|-------------|----------|---------|-------|------|
| 9.385    | MM m | 1.47        | 17394.08 | 1087.19 | 49.61 |      |
| 18.347   | MM m | 2.31        | 17665.40 | 456.27  | 50.39 |      |
| Sum      |      |             | 35059.48 |         |       |      |

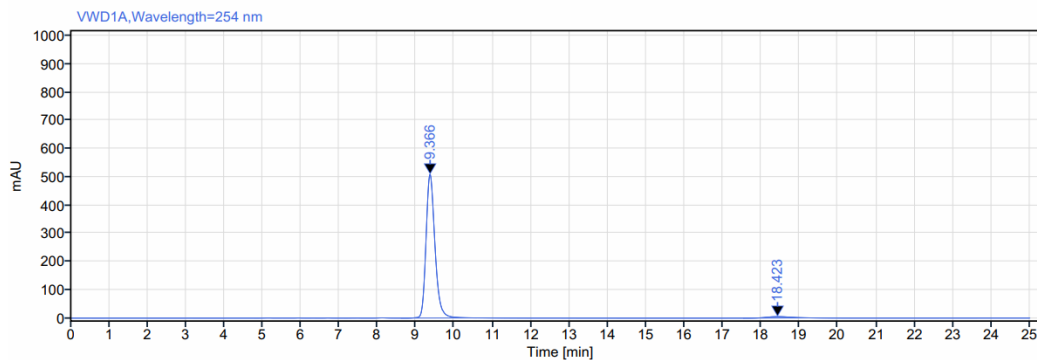

Signal: VWD1A,Wavelength=254 nm

| RT [min] | Type | Width [min] | Area    | Height | Area% | Name |
|----------|------|-------------|---------|--------|-------|------|
| 9.366    | MM m | 1.98        | 8243.36 | 509.23 | 97.50 |      |
| 18.423   | MM m | 1.75        | 211.34  | 5.00   | 2.50  |      |
| Sum      |      |             | 8454.71 |        |       |      |

HPLC (Chiralpak IC-3):  $t_R$  = 9.37 (major), 18.42 (minor)

Condition: *n*-Hexane:*i*-PrOH= 60:40, flow rate 0.8 mL/min, 25 °C, 254 nm.

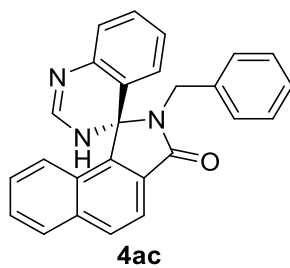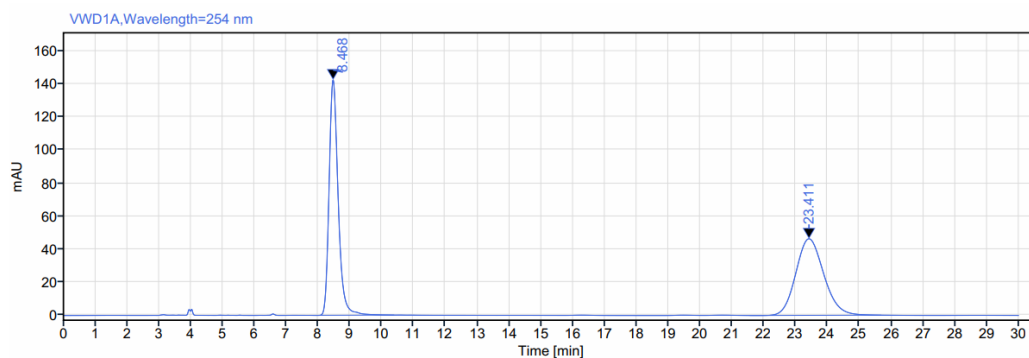

Signal: VWD1A,Wavelength=254 nm

| RT [min] | Type | Width [min] | Area    | Height | Area% | Name |
|----------|------|-------------|---------|--------|-------|------|
| 8.468    | MM m | 2.65        | 2818.80 | 142.49 | 49.97 |      |
| 23.411   | MM m | 4.13        | 2821.82 | 46.35  | 50.03 |      |
| Sum      |      |             | 5640.62 |        |       |      |

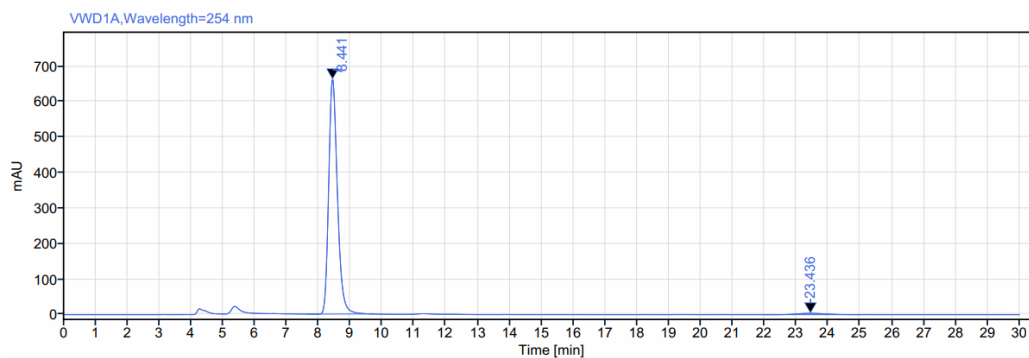

Signal: VWD1A,Wavelength=254 nm

| RT [min] | Type | Width [min] | Area     | Height | Area% | Name |
|----------|------|-------------|----------|--------|-------|------|
| 8.441    | MM m | 2.12        | 12607.47 | 662.37 | 98.10 |      |
| 23.436   | MM m | 3.05        | 244.12   | 3.98   | 1.90  |      |
| Sum      |      |             | 12851.59 |        |       |      |

HPLC (Chiralpak IC-3):  $t_R$  = 8.44 (major), 23.44 (minor)

Condition: 70:30, *n*-Hexane:*i*-PrOH, flow rate 1.0 mL/min, 25 °C, 254 nm.

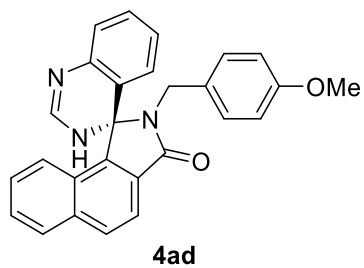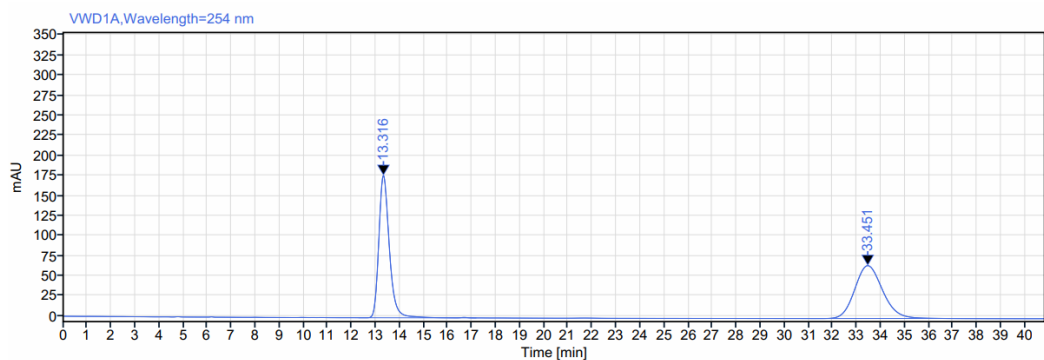

Signal: VWD1A,Wavelength=254 nm

| RT [min] | Type | Width [min] | Area     | Height | Area% | Name |
|----------|------|-------------|----------|--------|-------|------|
| 13.316   | MM m | 4.90        | 5400.17  | 177.31 | 50.52 |      |
| 33.451   | MM m | 5.46        | 5288.48  | 65.88  | 49.48 |      |
| Sum      |      |             | 10688.65 |        |       |      |

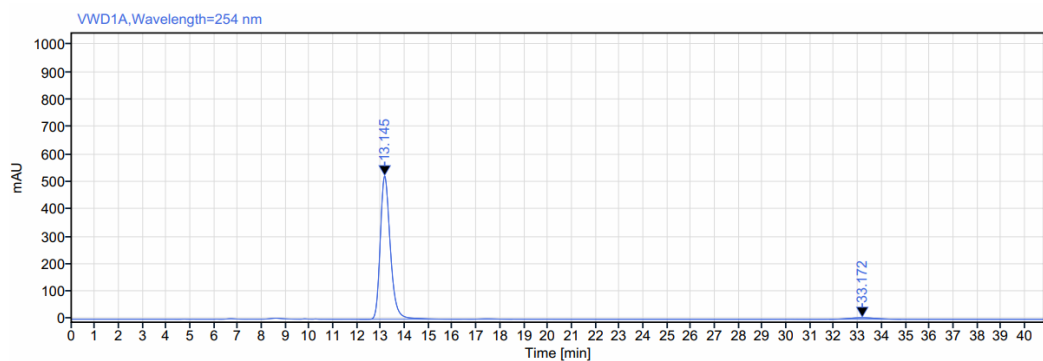

Signal: VWD1A,Wavelength=254 nm

| RT [min] | Type | Width [min] | Area     | Height | Area% | Name |
|----------|------|-------------|----------|--------|-------|------|
| 13.145   | MM m | 6.41        | 15386.36 | 520.97 | 97.23 |      |
| 33.172   | MM m | 3.01        | 438.76   | 5.65   | 2.77  |      |
| Sum      |      |             | 15825.13 |        |       |      |

HPLC (Chiralpak IC-3):  $t_R$  = 13.15 (major), 33.17 (minor)

Condition: *n*-Hexane:*i*-PrOH= 60:40, flow rate 0.8 mL/min, 25 °C, 254 nm.

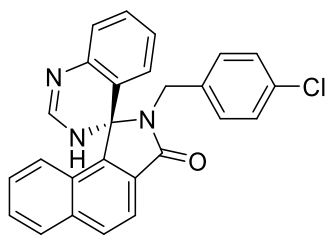

**4ae**

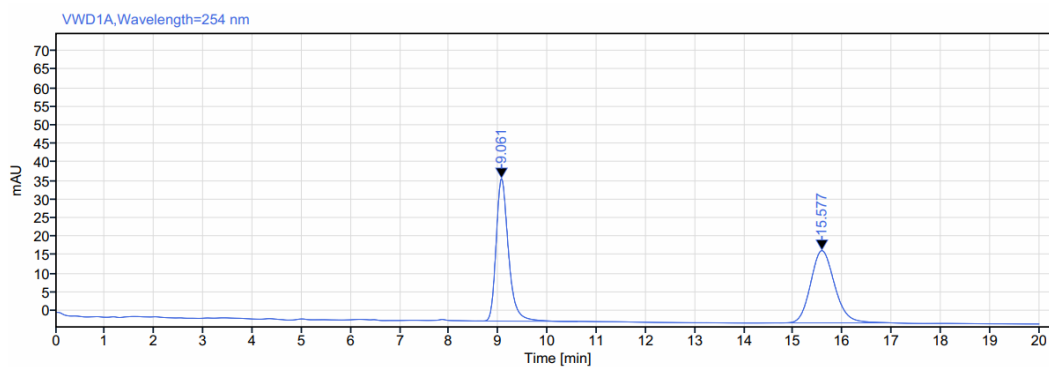

Signal: VWD1A,Wavelength=254 nm

| RT [min] | Type | Width [min] | Area    | Height | Area% | Name |
|----------|------|-------------|---------|--------|-------|------|
| 9.061    | MM m | 2.05        | 669.21  | 38.40  | 50.37 |      |
| 15.577   | MM m | 2.28        | 659.45  | 19.49  | 49.63 |      |
| Sum      |      |             | 1328.66 |        |       |      |

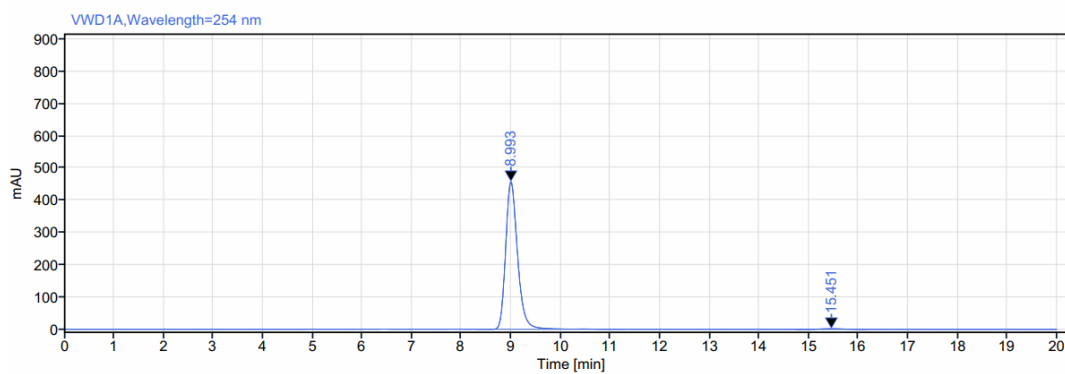

Signal: VWD1A,Wavelength=254 nm

| RT [min] | Type | Width [min] | Area    | Height | Area% | Name |
|----------|------|-------------|---------|--------|-------|------|
| 8.993    | MM m | 2.98        | 7645.47 | 458.35 | 99.14 |      |
| 15.451   | MM m | 1.47        | 66.14   | 2.03   | 0.86  |      |
| Sum      |      |             | 7711.61 |        |       |      |

HPLC (Chiralpak IC-3):  $t_R = 8.99$  (major), 15.45 (minor)

Condition: *n*-Hexane:*i*-PrOH= 60:40, flow rate 0.8 mL/min, 25 °C, 254 nm.

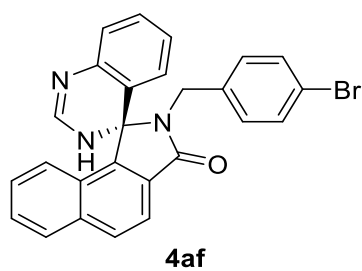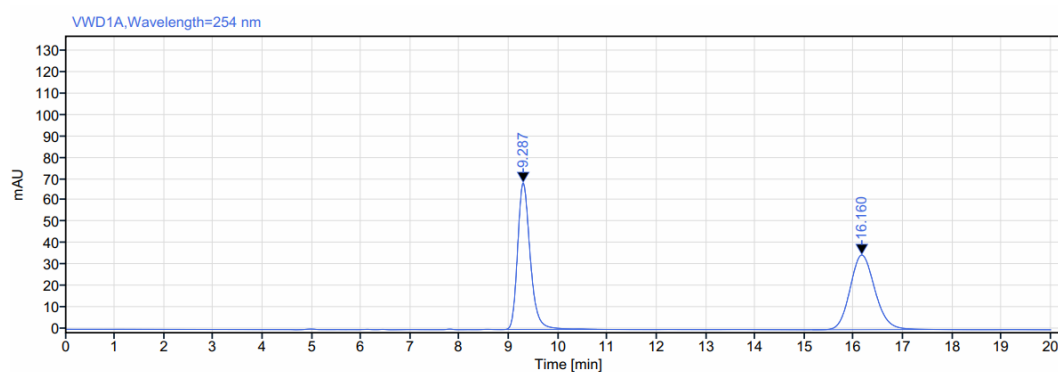

Signal: VWD1A,Wavelength=254 nm

| RT [min] | Type | Width [min] | Area    | Height | Area% | Name |
|----------|------|-------------|---------|--------|-------|------|
| 9.287    | MM m | 2.11        | 1214.57 | 68.26  | 49.94 |      |
| 16.160   | MM m | 2.53        | 1217.36 | 34.78  | 50.06 |      |
| Sum      |      |             | 2431.93 |        |       |      |

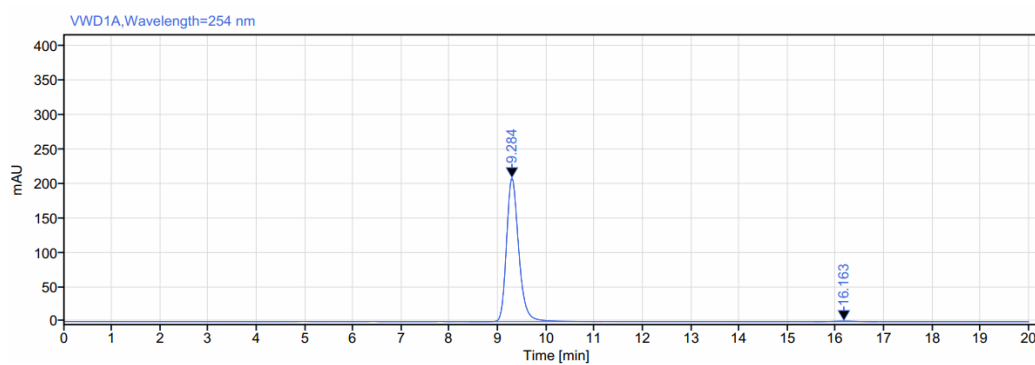

Signal: VWD1A,Wavelength=254 nm

| RT [min] | Type | Width [min] | Area    | Height | Area% | Name |
|----------|------|-------------|---------|--------|-------|------|
| 9.284    | MM m | 2.76        | 3675.13 | 208.71 | 99.22 |      |
| 16.163   | MM m | 1.30        | 28.79   | 0.86   | 0.78  |      |
| Sum      |      |             | 3703.92 |        |       |      |

HPLC (Chiralpak IC-3):  $t_R$  = 9.28 (major), 16.16 (minor)

Condition: *n*-Hexane:*i*-PrOH= 60:40, flow rate 0.8 mL/min, 25 °C, 254 nm.

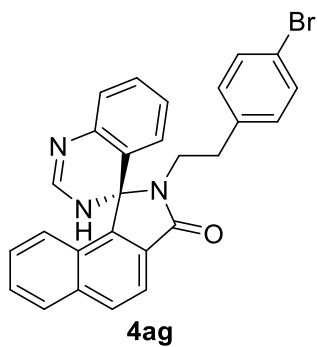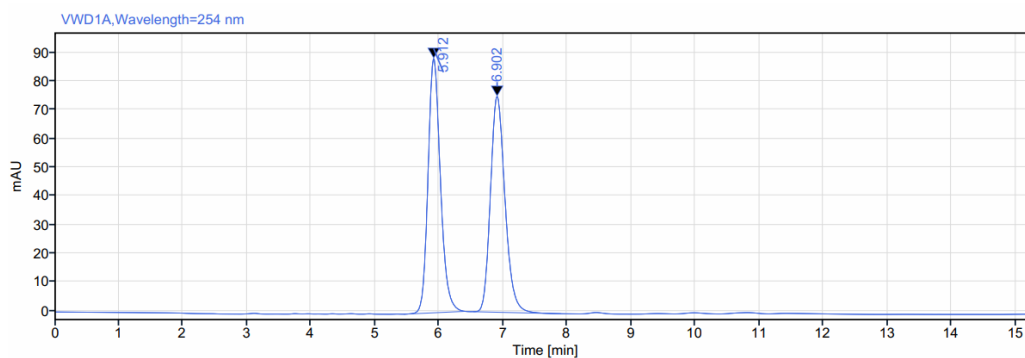

Signal: VWD1A,Wavelength=254 nm

| RT [min] | Type | Width [min] | Area    | Height | Area% | Name |
|----------|------|-------------|---------|--------|-------|------|
| 5.912    | MM m | 0.96        | 1190.36 | 88.56  | 50.01 |      |
| 6.902    | MM m | 1.37        | 1190.11 | 75.17  | 49.99 |      |
| Sum      |      |             | 2380.47 |        |       |      |

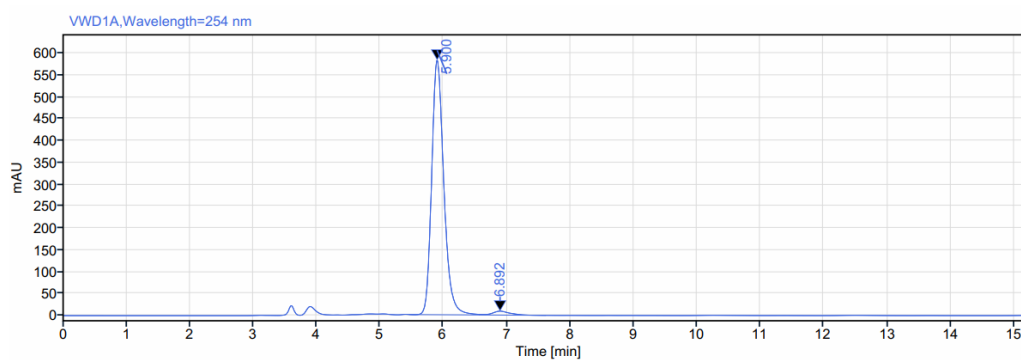

Signal: VWD1A,Wavelength=254 nm

| RT [min] | Type | Width [min] | Area    | Height | Area% | Name |
|----------|------|-------------|---------|--------|-------|------|
| 5.900    | MM m | 1.11        | 7769.18 | 583.13 | 97.82 |      |
| 6.892    | MM m | 1.05        | 173.13  | 8.98   | 2.18  |      |
| Sum      |      |             | 7942.31 |        |       |      |

HPLC (Chiralpak IC-3):  $t_R$  = 6.89 (major), 5.90 (minor)

Condition: 70:30, *n*-Hexane:*i*-PrOH, flow rate 1.0 mL/min, 25 °C, 254 nm.



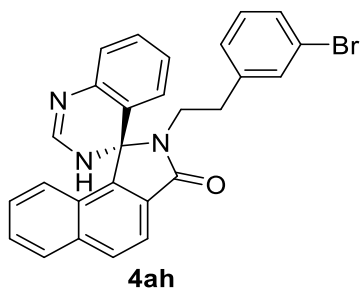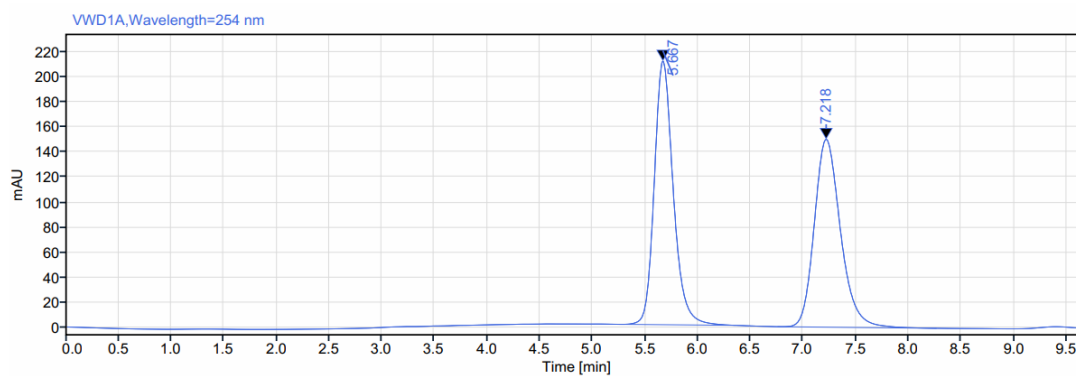

Signal: VWD1A,Wavelength=254 nm

| RT [min] | Type | Width [min] | Area    | Height | Area% | Name |
|----------|------|-------------|---------|--------|-------|------|
| 5.667    | MM m | 1.12        | 2633.97 | 209.72 | 50.47 |      |
| 7.218    | MM m | 1.51        | 2585.27 | 149.46 | 49.53 |      |
| Sum      |      |             | 5219.24 |        |       |      |

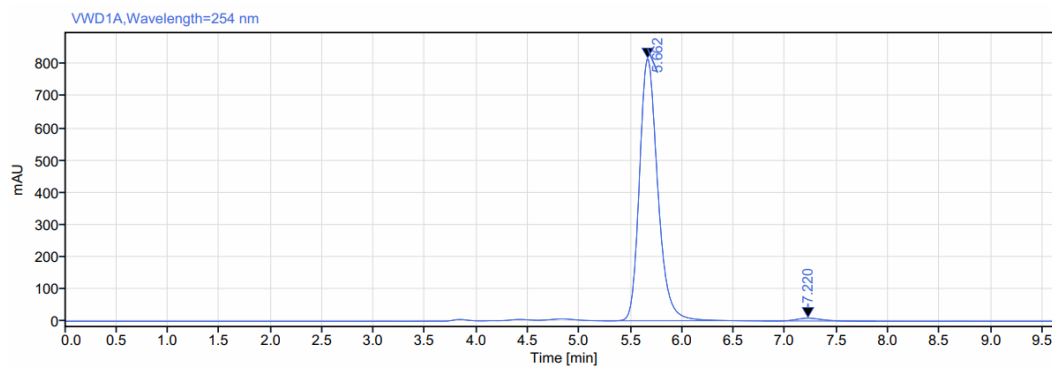

Signal: VWD1A,Wavelength=254 nm

| RT [min] | Type | Width [min] | Area     | Height | Area% | Name |
|----------|------|-------------|----------|--------|-------|------|
| 5.662    | MM m | 1.24        | 10080.00 | 815.92 | 98.52 |      |
| 7.220    | MM m | 1.10        | 151.05   | 8.94   | 1.48  |      |
| Sum      |      |             | 10231.05 |        |       |      |

HPLC (Chiralpak IC-3):  $t_R = 7.22$  (major), 5.66 (minor)

Condition: 70:30, *n*-Hexane:*i*-PrOH, flow rate 1.0 mL/min, 25 °C, 254 nm.

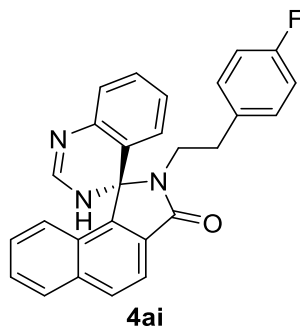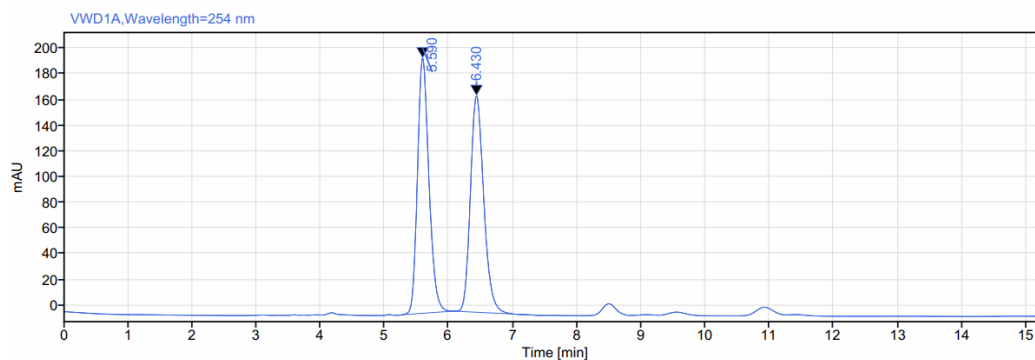

Signal: VWD1A, Wavelength=254 nm

| RT [min] | Type | Width [min] | Area    | Height | Area% | Name |
|----------|------|-------------|---------|--------|-------|------|
| 5.590    | MM m | 0.91        | 2465.54 | 198.77 | 50.32 |      |
| 6.430    | MM m | 1.36        | 2434.66 | 168.65 | 49.68 |      |
| Sum      |      |             | 4900.19 |        |       |      |

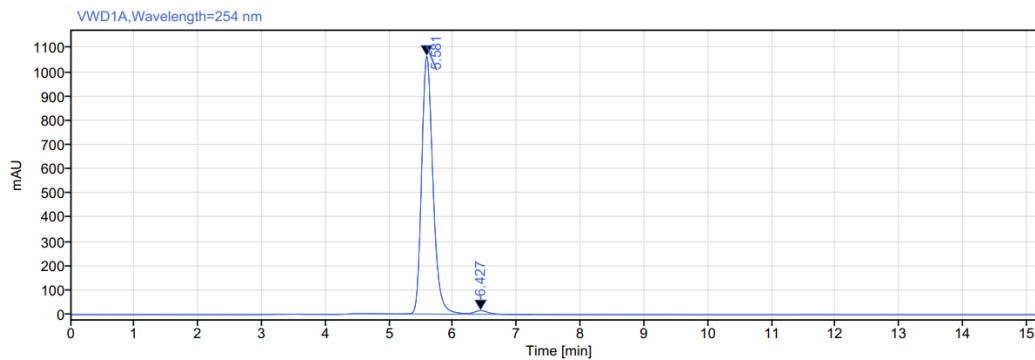

Signal: VWD1A, Wavelength=254 nm

| RT [min] | Type | Width [min] | Area     | Height  | Area% | Name |
|----------|------|-------------|----------|---------|-------|------|
| 5.581    | MM m | 1.07        | 13103.05 | 1065.11 | 98.19 |      |
| 6.427    | MM m | 1.02        | 241.46   | 15.30   | 1.81  |      |
| Sum      |      |             | 13344.51 |         |       |      |

HPLC (Chiralpak IC-3):  $t_R$  = 6.43 (major), 5.58 (minor)

Condition: 70:30, *n*-Hexane:*i*-PrOH, flow rate 1.0 mL/min, 25 °C, 254 nm.

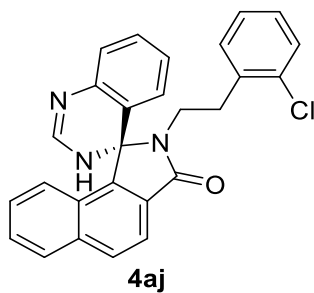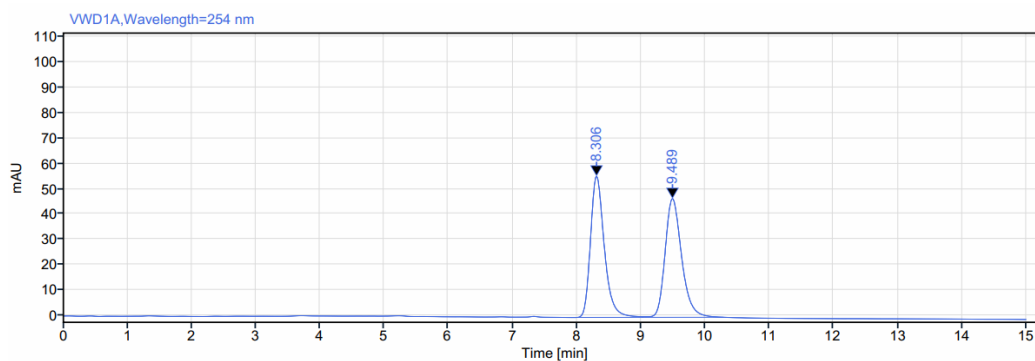

Signal: VWD1A,Wavelength=254 nm

| RT [min] | Type | Width [min] | Area    | Height | Area% | Name |
|----------|------|-------------|---------|--------|-------|------|
| 8.306    | MM m | 1.25        | 833.79  | 55.72  | 49.87 |      |
| 9.489    | MM m | 1.26        | 837.99  | 46.85  | 50.13 |      |
| Sum      |      |             | 1671.78 |        |       |      |

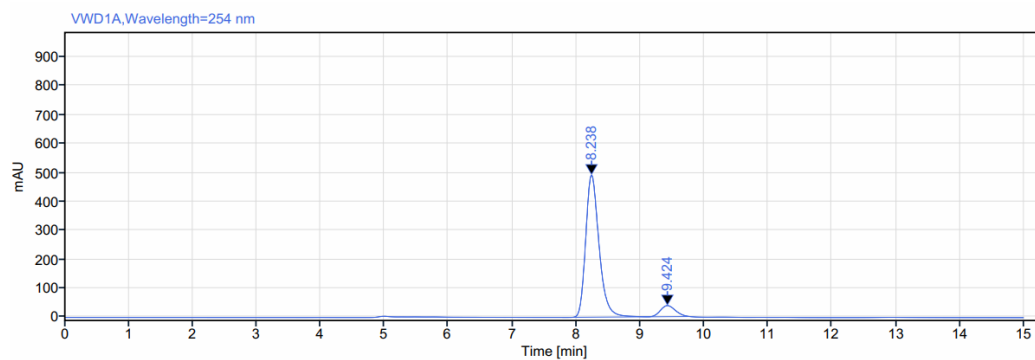

Signal: VWD1A,Wavelength=254 nm

| RT [min] | Type | Width [min] | Area    | Height | Area% | Name |
|----------|------|-------------|---------|--------|-------|------|
| 8.238    | MM m | 1.37        | 7141.84 | 491.69 | 91.92 |      |
| 9.424    | MM m | 0.62        | 628.10  | 38.36  | 8.08  |      |
| Sum      |      |             | 7769.93 |        |       |      |

HPLC (Chiralpak IC-3):  $t_R$  = 8.24 (major), 9.42 (minor)

Condition: *n*-Hexane:*i*-PrOH= 60:40, flow rate 0.8 mL/min, 25 °C, 254 nm.

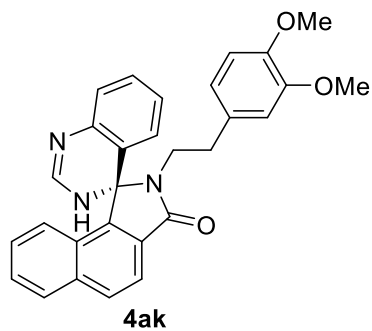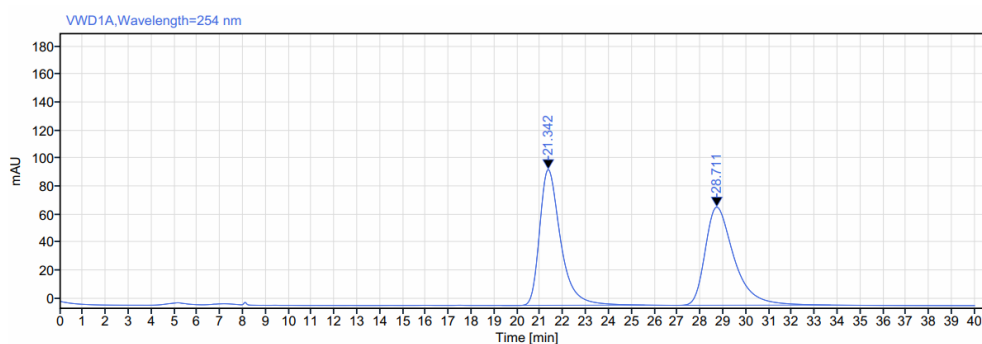

Signal: VWD1A,Wavelength=254 nm

| RT [min] | Type | Width [min] | Area     | Height | Area% | Name |
|----------|------|-------------|----------|--------|-------|------|
| 21.342   | MM m | 6.24        | 6170.00  | 97.07  | 50.10 |      |
| 28.711   | MM m | 6.92        | 6146.48  | 70.16  | 49.90 |      |
| Sum      |      |             | 12316.48 |        |       |      |

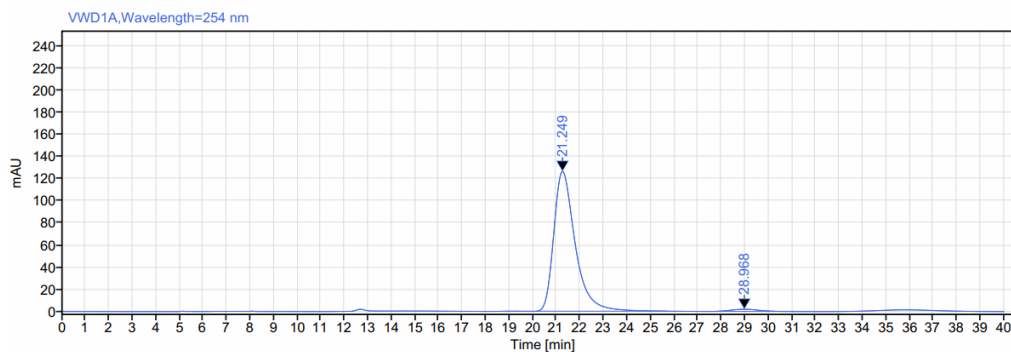

Signal: VWD1A,Wavelength=254 nm

| RT [min] | Type | Width [min] | Area    | Height | Area% | Name |
|----------|------|-------------|---------|--------|-------|------|
| 21.249   | MM m | 6.46        | 8009.08 | 126.99 | 98.02 |      |
| 28.968   | MM m | 3.54        | 161.60  | 1.97   | 1.98  |      |
| Sum      |      |             | 8170.68 |        |       |      |

HPLC (Chiralpak IC-3):  $t_R$  = 21.25 (major), 28.97 (minor)

Condition: *n*-Hexane:*i*-PrOH= 60:40, flow rate 0.8 mL/min, 25 °C, 254 nm.

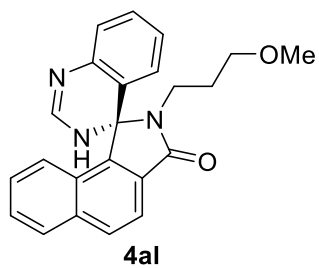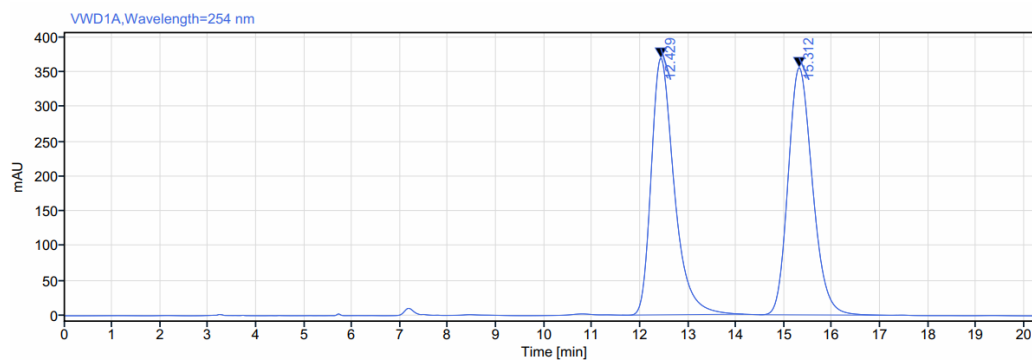

Signal: VWD1A, Wavelength=254 nm

| RT [min] | Type | Width [min] | Area     | Height | Area% | Name |
|----------|------|-------------|----------|--------|-------|------|
| 12.429   | MM m | 2.53        | 12300.18 | 368.93 | 49.55 |      |
| 15.312   | MM m | 2.87        | 12526.04 | 355.32 | 50.45 |      |
| Sum      |      |             | 24826.22 |        |       |      |

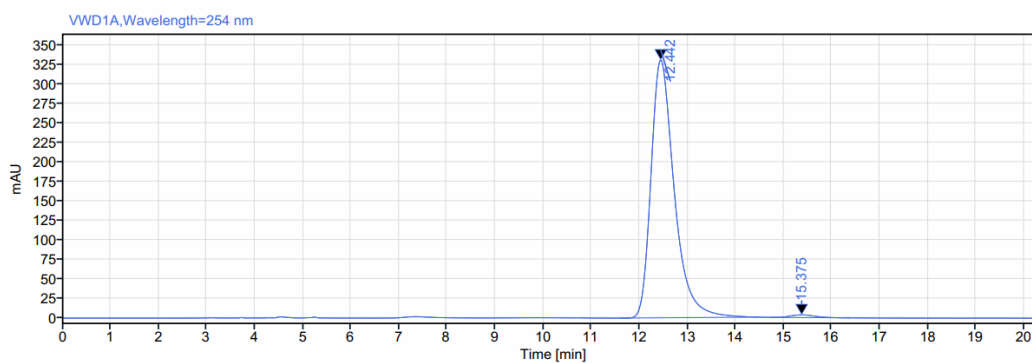

Signal: VWD1A, Wavelength=254 nm

| RT [min] | Type | Width [min] | Area     | Height | Area% | Name |
|----------|------|-------------|----------|--------|-------|------|
| 12.442   | MM m | 2.89        | 11150.86 | 331.17 | 98.92 |      |
| 15.375   | MM m | 1.66        | 121.49   | 3.47   | 1.08  |      |
| Sum      |      |             | 11272.35 |        |       |      |

HPLC (Chiralpak IC-3):  $t_R$  = 15.38 (major), 12.44 (minor)

Condition: 70:30, *n*-Hexane:*i*-PrOH, flow rate 1.0 mL/min, 25 °C, 254 nm.

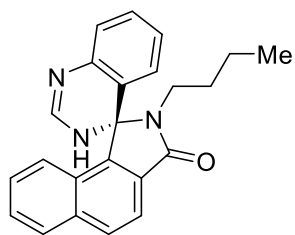

**4am**

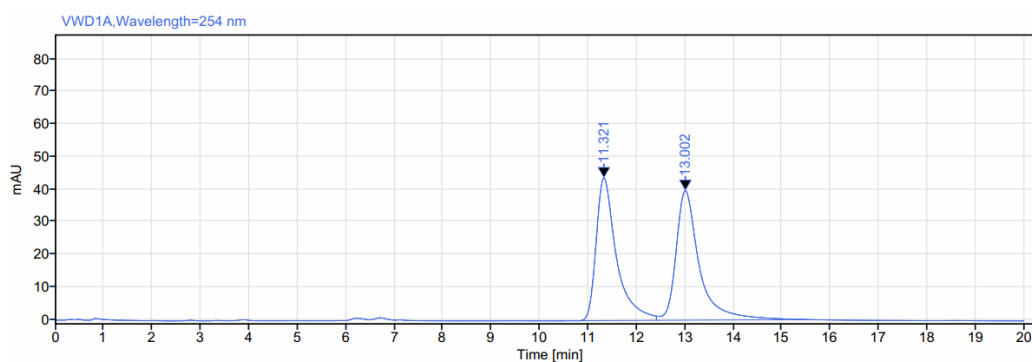

Signal: VWD1A,Wavelength=254 nm

| RT [min] | Type | Width [min] | Area    | Height | Area% | Name |
|----------|------|-------------|---------|--------|-------|------|
| 11.321   | MM m | 2.05        | 1279.45 | 43.88  | 49.00 |      |
| 13.002   | MM m | 3.12        | 1331.59 | 39.86  | 51.00 |      |
| Sum      |      |             | 2611.04 |        |       |      |

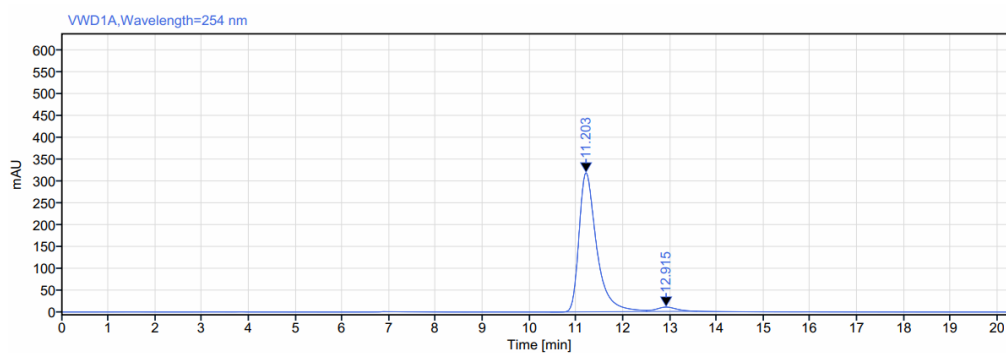

Signal: VWD1A,Wavelength=254 nm

| RT [min] | Type | Width [min] | Area    | Height | Area% | Name |
|----------|------|-------------|---------|--------|-------|------|
| 11.203   | MM m | 2.06        | 8341.61 | 318.94 | 96.50 |      |
| 12.915   | MM m | 1.09        | 302.34  | 9.90   | 3.50  |      |
| Sum      |      |             | 8643.96 |        |       |      |

HPLC (Chiralpak IC-3):  $t_R$  = 11.20 (major), 12.92 (minor)

Condition: *n*-Hexane:*i*-PrOH= 80:20, flow rate 1.0 mL/min, 25 °C, 254 nm.

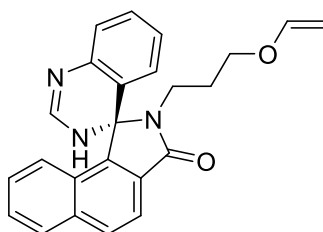

**4an**

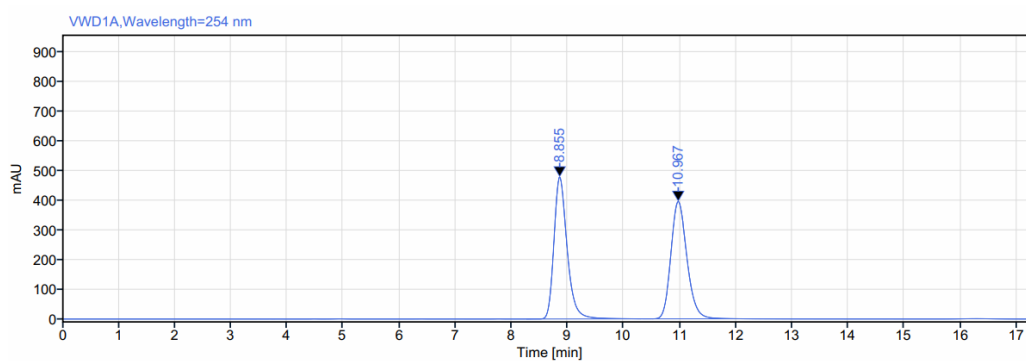

Signal: VWD1A,Wavelength=254 nm

| RT [min] | Type | Width [min] | Area     | Height | Area% | Name |
|----------|------|-------------|----------|--------|-------|------|
| 8.855    | MM m | 2.04        | 7816.61  | 478.47 | 49.91 |      |
| 10.967   | MM m | 1.55        | 7843.72  | 395.46 | 50.09 |      |
| Sum      |      |             | 15660.33 |        |       |      |

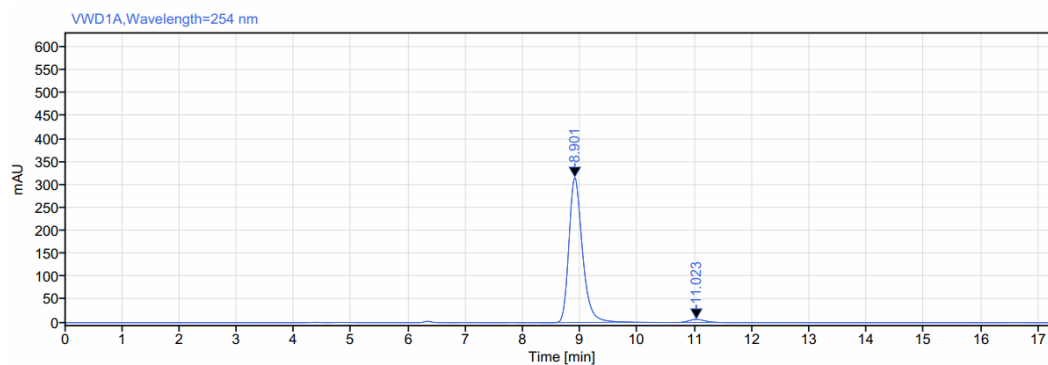

Signal: VWD1A,Wavelength=254 nm

| RT [min] | Type | Width [min] | Area    | Height | Area% | Name |
|----------|------|-------------|---------|--------|-------|------|
| 8.901    | MM m | 1.58        | 5160.53 | 315.39 | 97.51 |      |
| 11.023   | MM m | 0.96        | 131.77  | 6.72   | 2.49  |      |
| Sum      |      |             | 5292.30 |        |       |      |

HPLC (Chiralpak IC-3):  $t_R$  = 8.90 (major), 11.02 (minor)

Condition: *n*-Hexane:*i*-PrOH= 60:40, flow rate 0.8 mL/min, 25 °C, 254 nm.

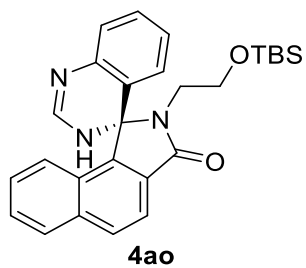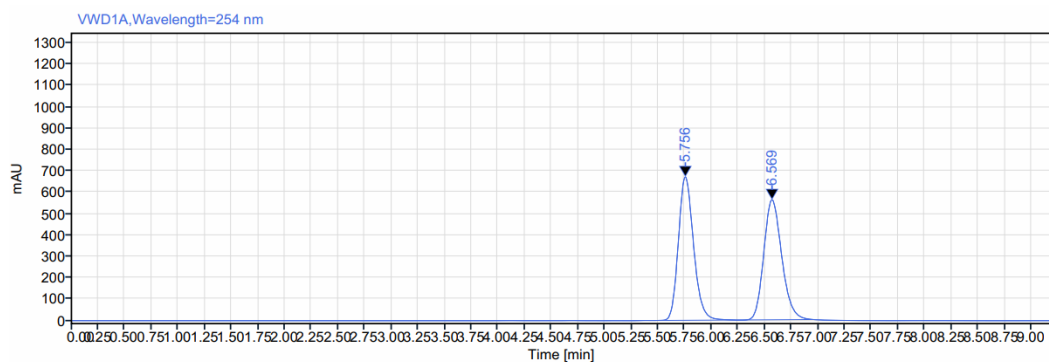

Signal: VWD1A,Wavelength=254 nm

| RT [min] | Type | Width [min] | Area     | Height | Area% | Name |
|----------|------|-------------|----------|--------|-------|------|
| 5.756    | MM m | 0.75        | 6640.39  | 671.84 | 50.27 |      |
| 6.569    | MM m | 0.74        | 6569.47  | 561.92 | 49.73 |      |
| Sum      |      |             | 13209.85 |        |       |      |

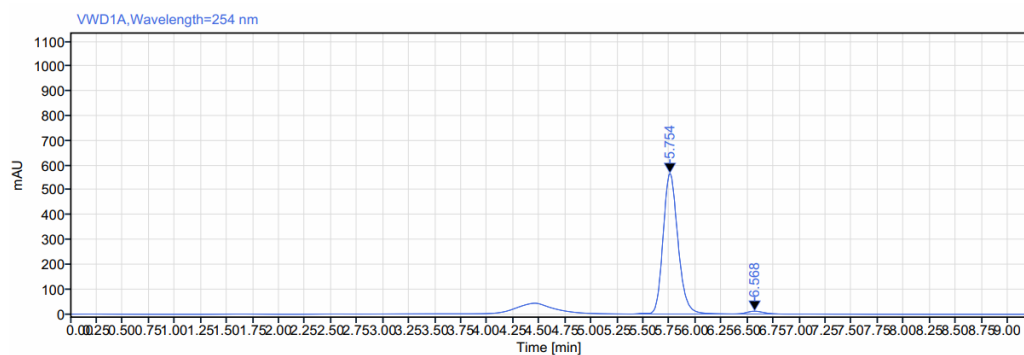

Signal: VWD1A,Wavelength=254 nm

| RT [min] | Type | Width [min] | Area    | Height | Area% | Name |
|----------|------|-------------|---------|--------|-------|------|
| 5.754    | MM m | 1.02        | 5645.30 | 567.56 | 97.93 |      |
| 6.568    | MM m | 0.40        | 119.57  | 11.01  | 2.07  |      |
| Sum      |      |             | 5764.87 |        |       |      |

HPLC (Chiralpak IC-3):  $t_R$  = 5.75 (major), 6.57 (minor)

Condition: *n*-Hexane:*i*-PrOH= 70:30, flow rate 1.0 mL/min, 25 °C, 254 nm.



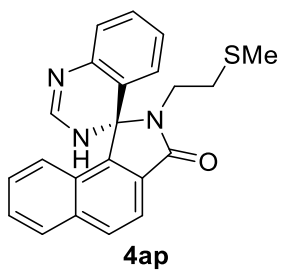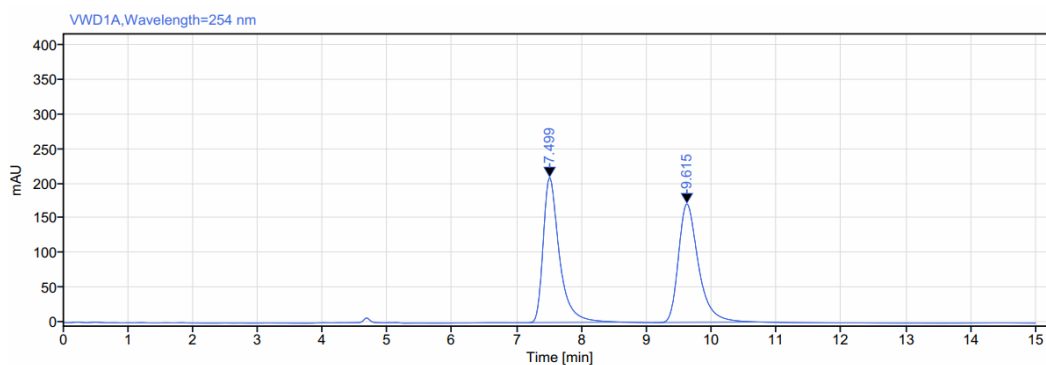

Signal: VWD1A, Wavelength=254 nm

| RT [min] | Type | Width [min] | Area    | Height | Area% | Name |
|----------|------|-------------|---------|--------|-------|------|
| 7.499    | MM m | 1.70        | 3623.54 | 208.37 | 49.73 |      |
| 9.615    | MM m | 1.64        | 3663.20 | 170.42 | 50.27 |      |
| Sum      |      |             | 7286.75 |        |       |      |

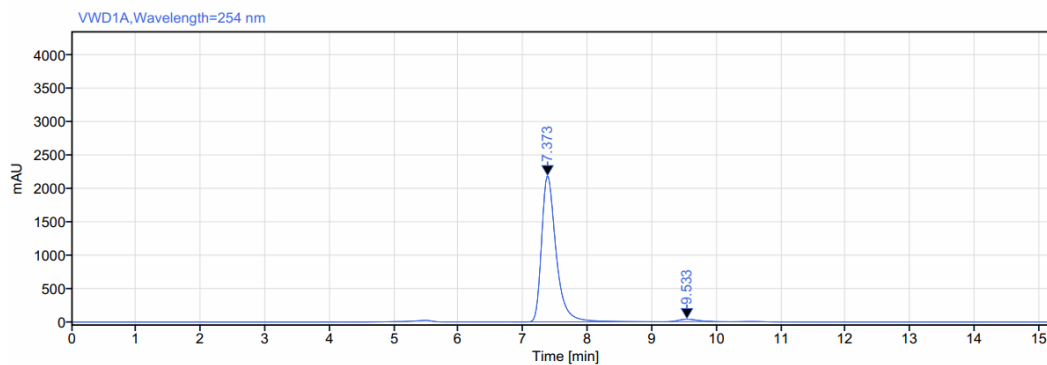

Signal: VWD1A, Wavelength=254 nm

| RT [min] | Type | Width [min] | Area     | Height  | Area% | Name |
|----------|------|-------------|----------|---------|-------|------|
| 7.373    | BM m | 2.28        | 34196.94 | 2184.11 | 97.98 |      |
| 9.533    | MM m | 0.68        | 704.56   | 36.44   | 2.02  |      |
| Sum      |      |             | 34901.50 |         |       |      |

HPLC (Chiralpak IC-3):  $t_R$  = 7.37 (major), 9.53 (minor)

Condition: *n*-Hexane:*i*-PrOH= 60:40, flow rate 1.0 mL/min, 25 °C, 254 nm.

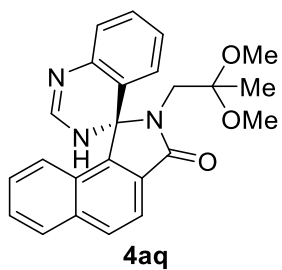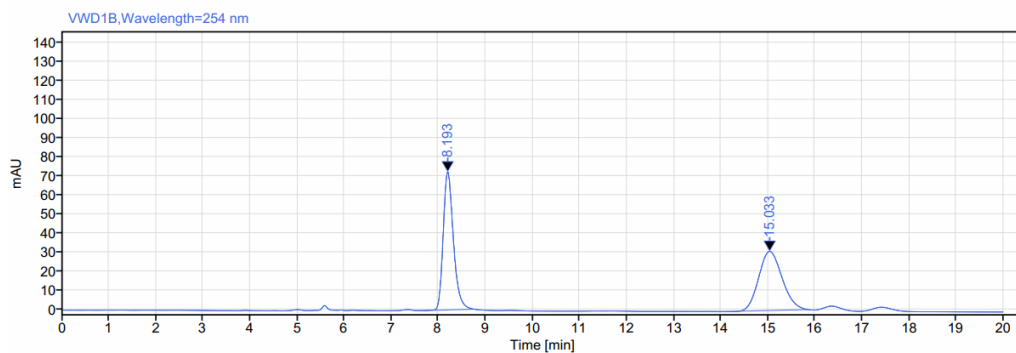

Signal: VWD1B,Wavelength=254 nm

| RT [min] | Type | Width [min] | Area    | Height | Area% | Name |
|----------|------|-------------|---------|--------|-------|------|
| 8.193    | MM m | 1.10        | 1085.13 | 72.22  | 50.44 |      |
| 15.033   | MM m | 1.75        | 1066.33 | 30.96  | 49.56 |      |
| Sum      |      |             | 2151.46 |        |       |      |

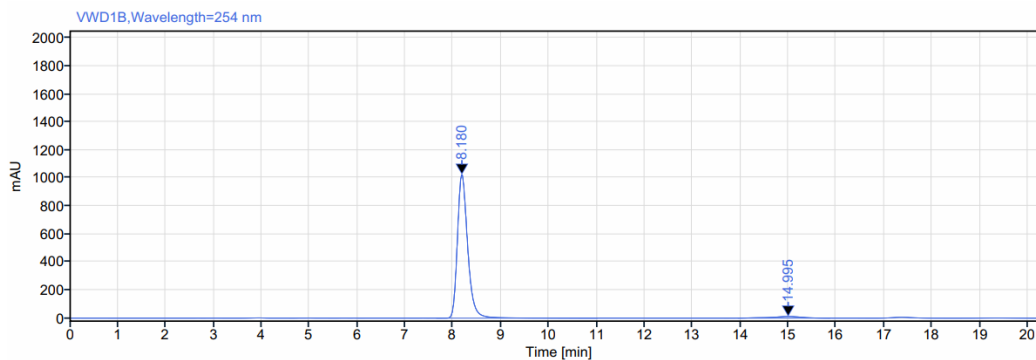

Signal: VWD1B,Wavelength=254 nm

| RT [min] | Type | Width [min] | Area     | Height  | Area% | Name |
|----------|------|-------------|----------|---------|-------|------|
| 8.180    | VB   | 3.36        | 15303.31 | 1026.35 | 96.70 |      |
| 14.995   | MM m | 1.93        | 522.91   | 12.11   | 3.30  |      |
| Sum      |      |             | 15826.22 |         |       |      |

HPLC (Chiralpak IC-3):  $t_R$  = 8.18 (major), 15.00 (minor)

Condition: *n*-Hexane:*i*-PrOH= 50:50, flow rate 0.8 mL/min, 25 °C, 254 nm.

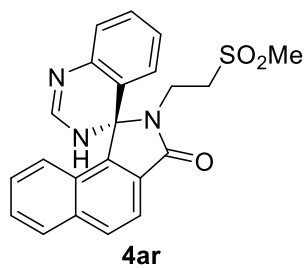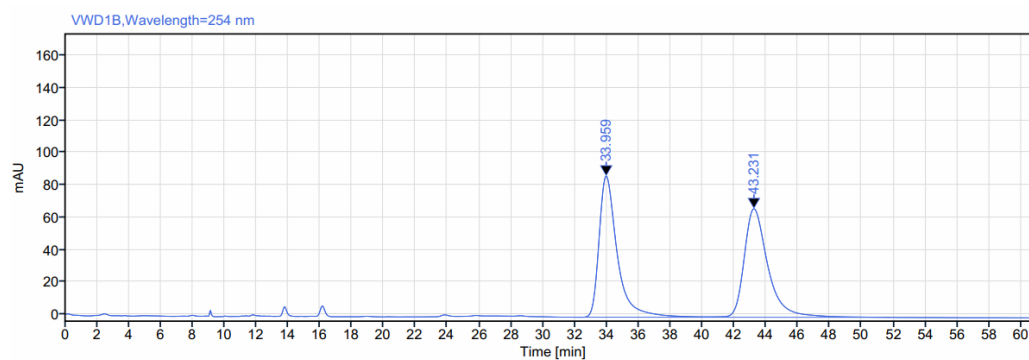

Signal: VWD1B,Wavelength=254 nm

| RT [min] | Type | Width [min] | Area     | Height | Area% | Name |
|----------|------|-------------|----------|--------|-------|------|
| 33.959   | MM m | 8.57        | 6916.85  | 87.12  | 49.98 |      |
| 43.231   | MM m | 11.18       | 6922.67  | 67.01  | 50.02 |      |
| Sum      |      |             | 13839.53 |        |       |      |

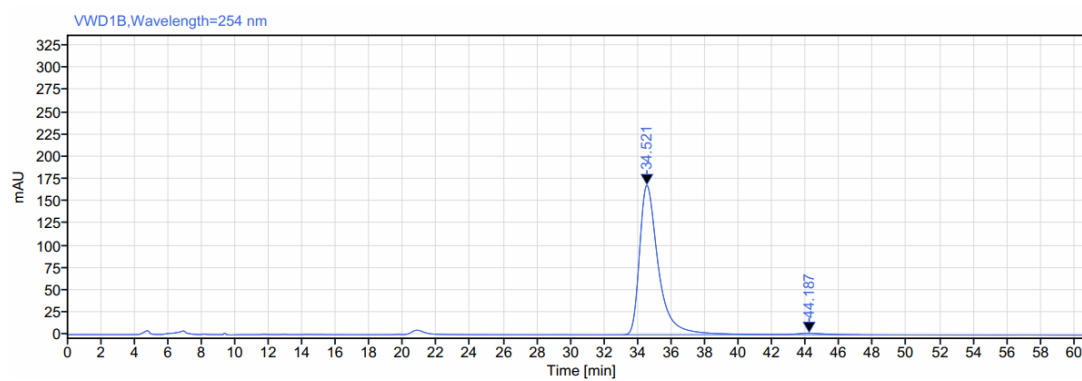

Signal: VWD1B,Wavelength=254 nm

| RT [min] | Type | Width [min] | Area     | Height | Area% | Name |
|----------|------|-------------|----------|--------|-------|------|
| 34.521   | MM m | 10.19       | 13101.80 | 168.16 | 98.59 |      |
| 44.187   | MM m | 4.91        | 187.08   | 1.78   | 1.41  |      |
| Sum      |      |             | 13288.88 |        |       |      |

HPLC (Chiralpak IC-3):  $t_R$  = 34.52 (major), 44.19 (minor)

Condition: *n*-Hexane:*i*-PrOH= 50:50, flow rate 0.5 mL/min, 25 °C, 254 nm.

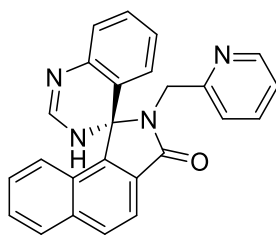

**4as**

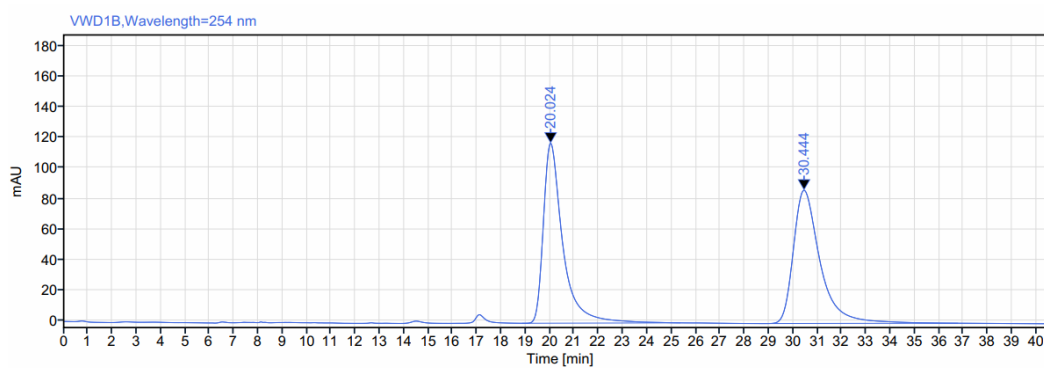

Signal: VWD1B,Wavelength=254 nm

| RT [min] | Type | Width [min] | Area     | Height | Area% | Name |
|----------|------|-------------|----------|--------|-------|------|
| 20.024   | MM m | 6.51        | 6541.88  | 117.55 | 49.55 |      |
| 30.444   | MM m | 8.18        | 6661.30  | 87.02  | 50.45 |      |
| Sum      |      |             | 13203.18 |        |       |      |

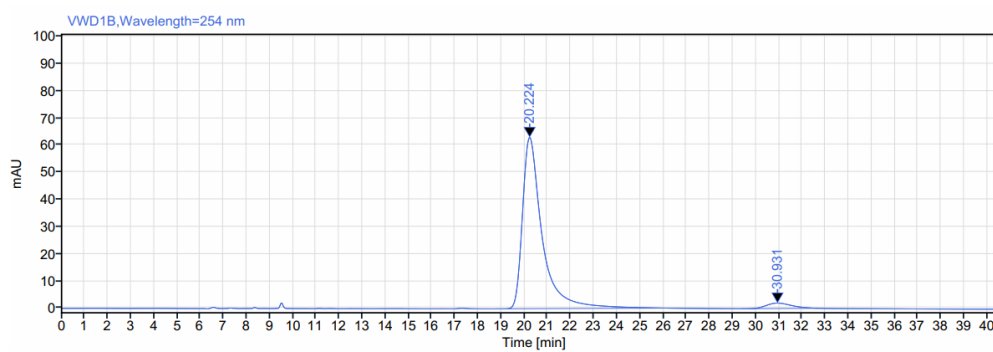

Signal: VWD1B,Wavelength=254 nm

| RT [min] | Type | Width [min] | Area    | Height | Area% | Name |
|----------|------|-------------|---------|--------|-------|------|
| 20.224   | MM m | 7.40        | 3726.49 | 63.00  | 96.05 |      |
| 30.931   | MM m | 3.35        | 153.42  | 2.01   | 3.95  |      |
| Sum      |      |             | 3879.91 |        |       |      |

HPLC (Chiralpak IC-3):  $t_R$  = 20.22 (major), 30.93 (minor)

Condition: *n*-Hexane:*i*-PrOH= 40:60, flow rate 0.5 mL/min, 25 °C, 254 nm.

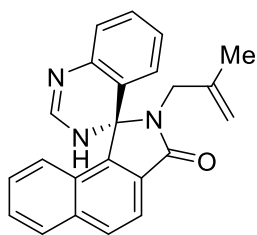

**4at**

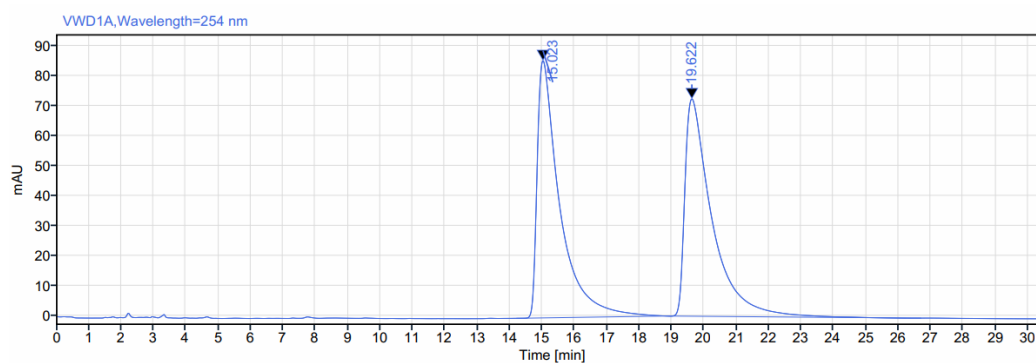

Signal: VWD1A,Wavelength=254 nm

| RT [min] | Type | Width [min] | Area    | Height | Area% | Name |
|----------|------|-------------|---------|--------|-------|------|
| 15.023   | MM m | 4.62        | 4149.10 | 85.55  | 49.70 |      |
| 19.622   | MM m | 7.88        | 4199.27 | 72.29  | 50.30 |      |
| Sum      |      |             | 8348.37 |        |       |      |

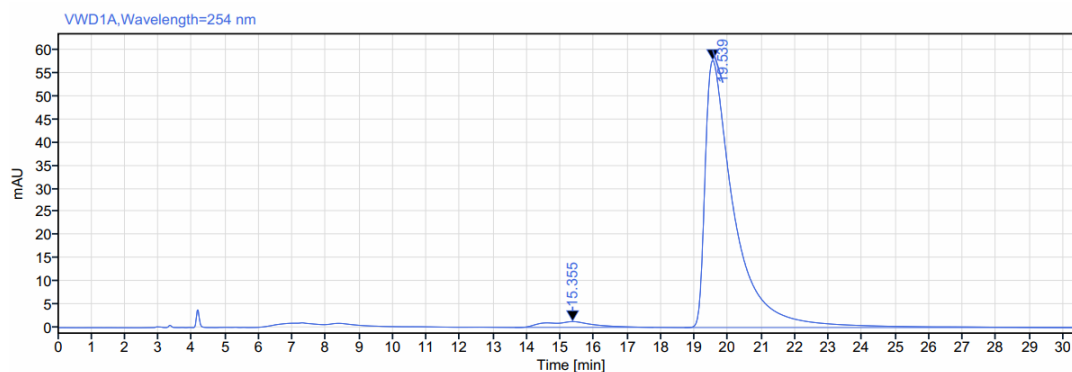

Signal: VWD1A,Wavelength=254 nm

| RT [min] | Type | Width [min] | Area    | Height | Area% | Name |
|----------|------|-------------|---------|--------|-------|------|
| 15.355   | MM m | 4.14        | 127.15  | 1.26   | 3.50  |      |
| 19.539   | MM m | 12.02       | 3509.40 | 57.77  | 96.50 |      |
| Sum      |      |             | 3636.56 |        |       |      |

HPLC (Chiralpak IA-3):  $t_R$  = 19.54 (major), 15.36 (minor)

Condition: 90:10, *n*-Hexane:*i*-PrOH, flow rate 1.0 mL/min, 25 °C, 254 nm.

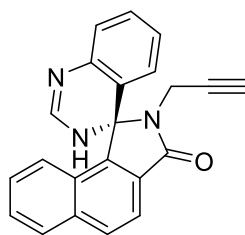

**4au**

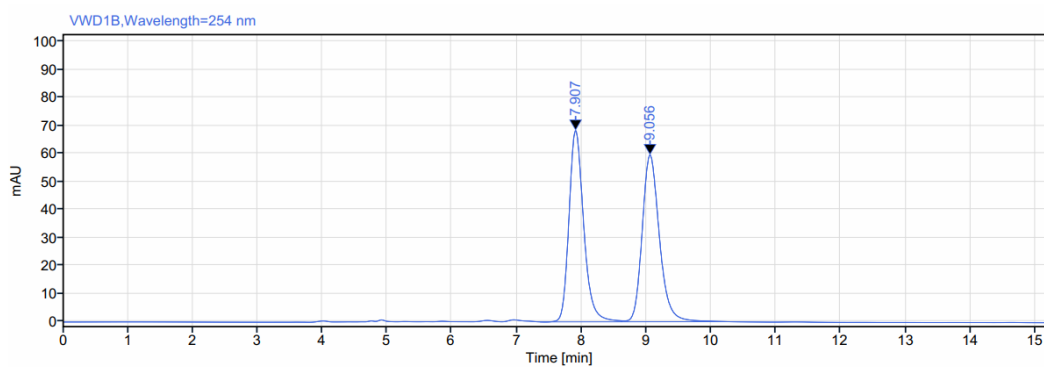

Signal: VWD1B,Wavelength=254 nm

| RT [min] | Type | Width [min] | Area    | Height | Area% | Name |
|----------|------|-------------|---------|--------|-------|------|
| 7.907    | MM m | 1.26        | 1075.65 | 68.16  | 49.45 |      |
| 9.056    | MM m | 1.62        | 1099.72 | 59.41  | 50.55 |      |
| Sum      |      |             | 2175.36 |        |       |      |

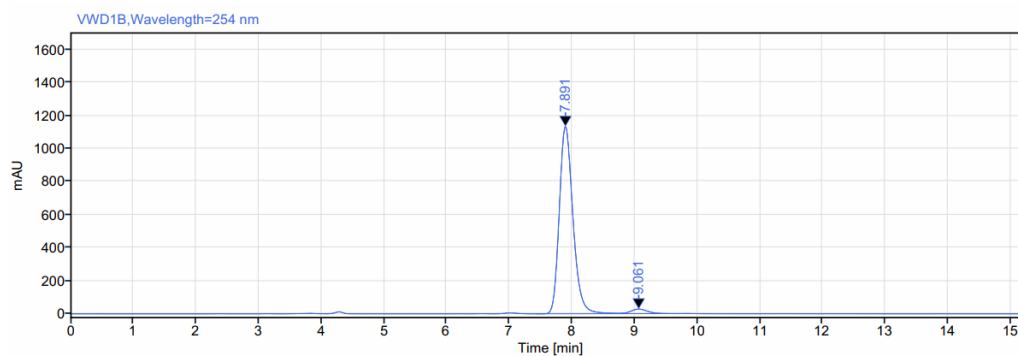

Signal: VWD1B,Wavelength=254 nm

| RT [min] | Type | Width [min] | Area     | Height  | Area% | Name |
|----------|------|-------------|----------|---------|-------|------|
| 7.891    | MM m | 1.35        | 17143.56 | 1134.22 | 97.08 |      |
| 9.061    | MM m | 1.10        | 515.31   | 27.95   | 2.92  |      |
| Sum      |      |             | 17658.86 |         |       |      |

HPLC (Chiralpak IC-3):  $t_R$  = 10.01 (major), 10.57 (minor)

Condition: *n*-Hexane:*i*-PrOH= 70:30, flow rate 0.5 mL/min, 25 °C, 254 nm.

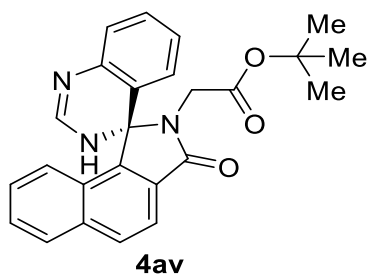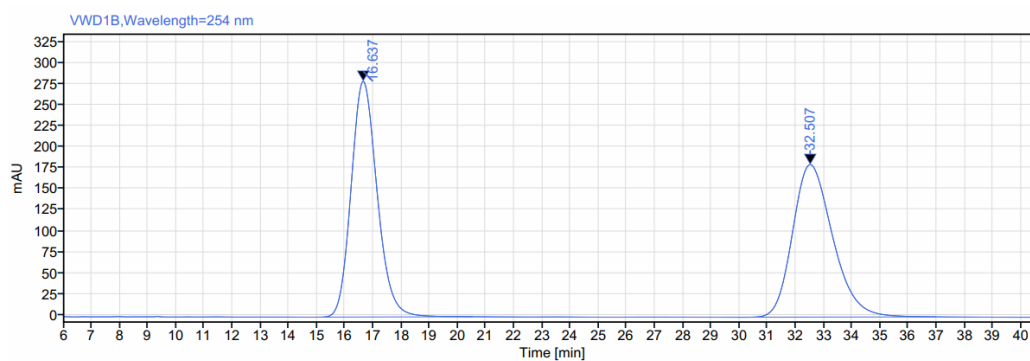

Signal: VWD1B,Wavelength=254 nm

| RT [min] | Type | Width [min] | Area     | Height | Area% | Name |
|----------|------|-------------|----------|--------|-------|------|
| 16.637   | MM m | 5.73        | 18068.27 | 281.46 | 50.07 |      |
| 32.507   | MM m | 6.94        | 18017.54 | 182.12 | 49.93 |      |
| Sum      |      |             | 36085.82 |        |       |      |

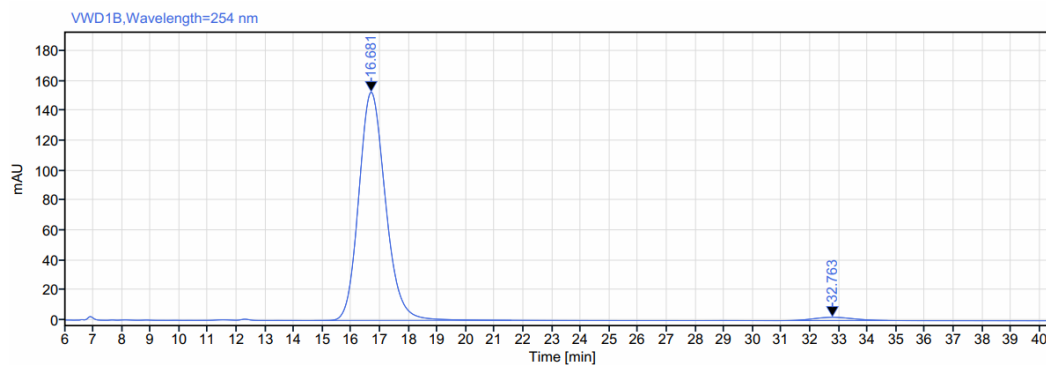

Signal: VWD1B,Wavelength=254 nm

| RT [min] | Type | Width [min] | Area     | Height | Area% | Name |
|----------|------|-------------|----------|--------|-------|------|
| 16.681   | MM m | 6.88        | 9855.36  | 152.43 | 97.91 |      |
| 32.763   | MM m | 3.98        | 210.27   | 2.21   | 2.09  |      |
| Sum      |      |             | 10065.63 |        |       |      |

HPLC (Chiralpak IC-3):  $t_R$  = 16.68 (major), 32.76 (minor)

Condition: *n*-Hexane:*i*-PrOH= 50:50, flow rate 0.8 mL/min, 25 °C, 254 nm.

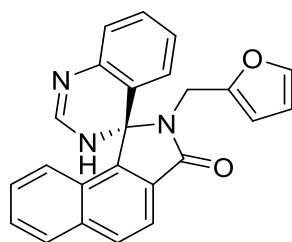

**4aw**

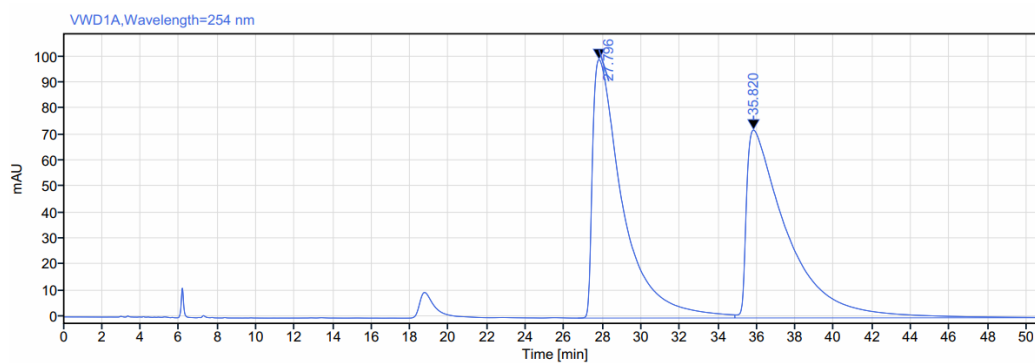

Signal: VWD1A,Wavelength=254 nm

| RT [min] | Type | Width [min] | Area     | Height | Area% | Name |
|----------|------|-------------|----------|--------|-------|------|
| 27.796   | MM m | 8.15        | 10841.01 | 99.33  | 50.31 |      |
| 35.820   | MM m | 17.98       | 10706.26 | 72.21  | 49.69 |      |
| Sum      |      |             | 21547.27 |        |       |      |

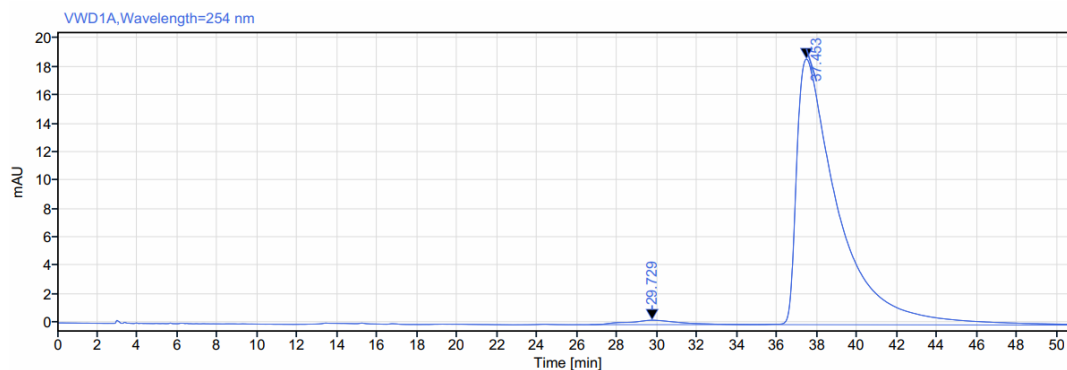

Signal: VWD1A,Wavelength=254 nm

| RT [min] | Type | Width [min] | Area    | Height | Area% | Name |
|----------|------|-------------|---------|--------|-------|------|
| 29.729   | MM m | 8.37        | 56.40   | 0.31   | 2.05  |      |
| 37.453   | MM m | 20.09       | 2696.02 | 18.68  | 97.95 |      |
| Sum      |      |             | 2752.43 |        |       |      |

HPLC (Chiralpak IA-3):  $t_R$  = 37.45 (major), 29.73 (minor)

Condition: 90:10, *n*-Hexane:*i*-PrOH, flow rate 1.0 mL/min, 25 °C, 254 nm.



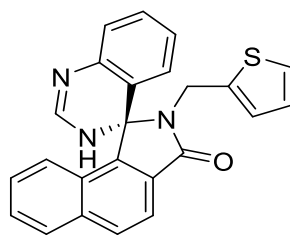

**4ax**

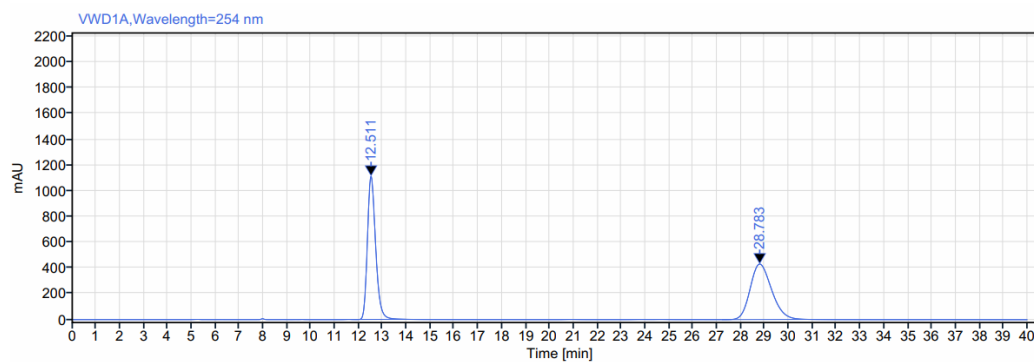

Signal: VWD1A,Wavelength=254 nm

| RT [min] | Type | Width [min] | Area     | Height  | Area% | Name |
|----------|------|-------------|----------|---------|-------|------|
| 12.511   | MM m | 2.30        | 26563.21 | 1112.44 | 49.76 |      |
| 28.783   | MM m | 3.60        | 26815.83 | 430.97  | 50.24 |      |
| Sum      |      |             | 53379.04 |         |       |      |

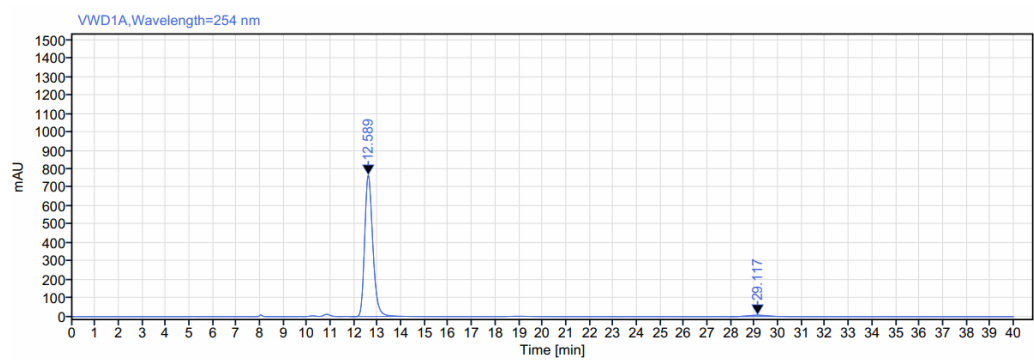

Signal: VWD1A,Wavelength=254 nm

| RT [min] | Type | Width [min] | Area     | Height | Area% | Name |
|----------|------|-------------|----------|--------|-------|------|
| 12.589   | MM m | 2.24        | 18430.78 | 767.08 | 97.70 |      |
| 29.117   | MM m | 2.20        | 434.37   | 7.42   | 2.30  |      |
| Sum      |      |             | 18865.15 |        |       |      |

HPLC (Chiralpak IC-3):  $t_R$  = 12.56 (major), 29.12 (minor)

Condition: *n*-Hexane:*i*-PrOH= 60:40, flow rate 0.8 mL/min, 25 °C, 254 nm.

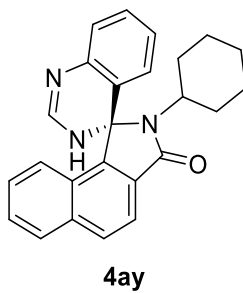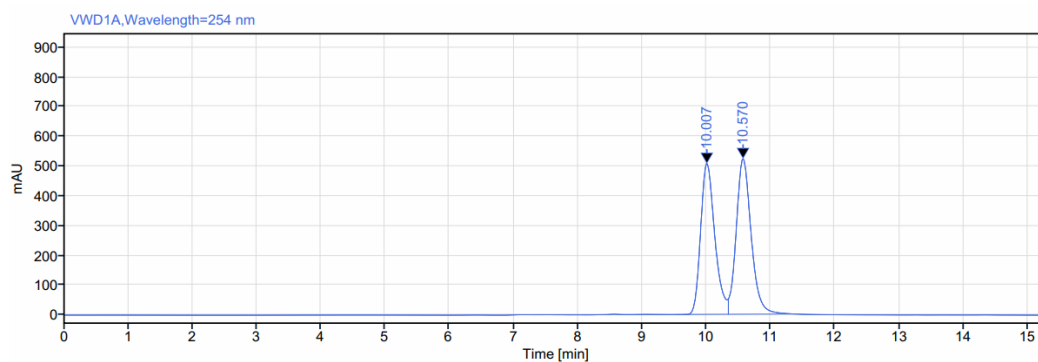

Signal: VWD1A,Wavelength=254 nm

| RT [min] | Type | Width [min] | Area     | Height | Area% | Name |
|----------|------|-------------|----------|--------|-------|------|
| 10.007   | MM m | 0.70        | 7800.52  | 507.58 | 48.06 |      |
| 10.570   | MM m | 1.03        | 8431.25  | 523.26 | 51.94 |      |
| Sum      |      |             | 16231.76 |        |       |      |

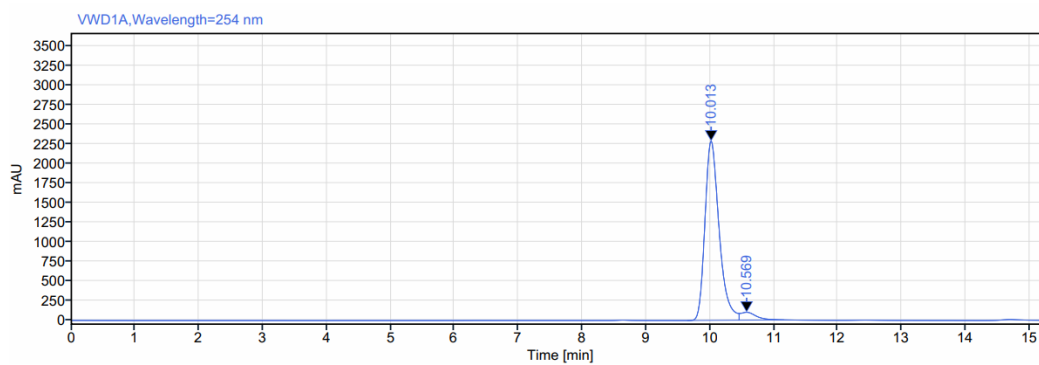

Signal: VWD1A,Wavelength=254 nm

| RT [min] | Type | Width [min] | Area     | Height  | Area% | Name |
|----------|------|-------------|----------|---------|-------|------|
| 10.013   | MM m | 0.81        | 35289.84 | 2288.84 | 95.33 |      |
| 10.569   | MM m | 0.70        | 1730.41  | 100.11  | 4.67  |      |
| Sum      |      |             | 37020.25 |         |       |      |

HPLC (Chiralpak IC-3):  $t_R$  = 10.01 (major), 10.57 (minor)

Condition: *n*-Hexane:*i*-PrOH= 70:30, flow rate 0.5 mL/min, 25 °C, 254 nm.

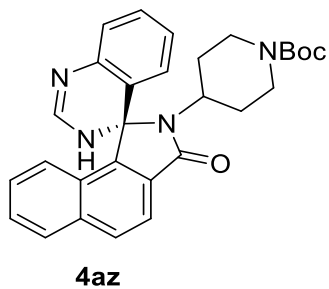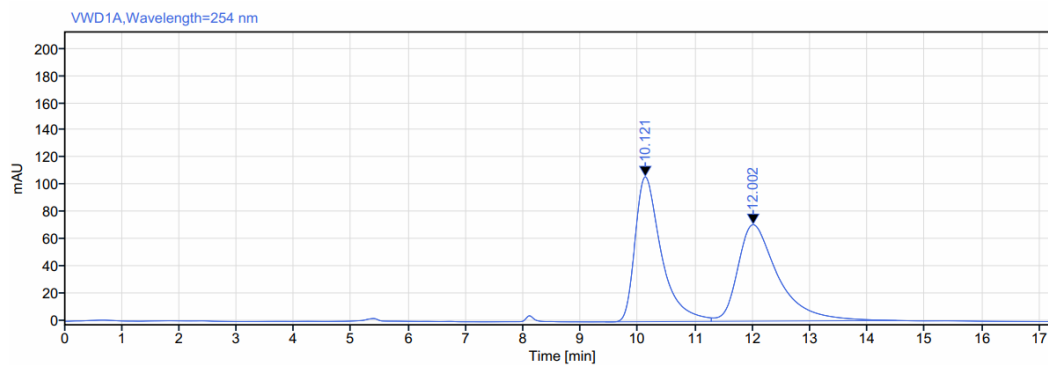

Signal: VWD1A,Wavelength=254 nm

| RT [min] | Type | Width [min] | Area    | Height | Area% | Name |
|----------|------|-------------|---------|--------|-------|------|
| 10.121   | MM m | 1.85        | 3385.71 | 106.37 | 49.45 |      |
| 12.002   | MM m | 3.23        | 3460.72 | 70.86  | 50.55 |      |
| Sum      |      |             | 6846.43 |        |       |      |

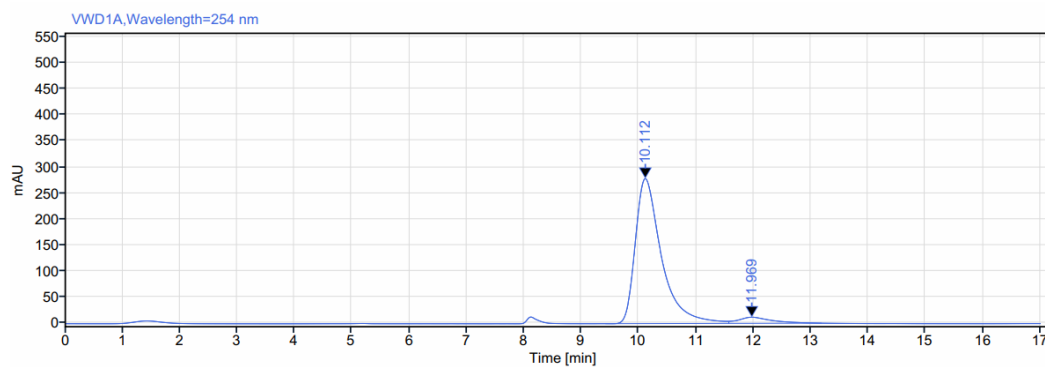

Signal: VWD1A,Wavelength=254 nm

| RT [min] | Type | Width [min] | Area    | Height | Area% | Name |
|----------|------|-------------|---------|--------|-------|------|
| 10.112   | MM m | 2.15        | 8819.30 | 278.69 | 94.93 |      |
| 11.969   | MM m | 1.62        | 471.02  | 11.84  | 5.07  |      |
| Sum      |      |             | 9290.31 |        |       |      |

HPLC (Chiralpak IC-3):  $t_R$  = 10.11 (major), 11.97 (minor)

Condition: *n*-Hexane:*i*-PrOH=60:40, flow rate 0.8 mL/min, 25 °C, 254 nm.

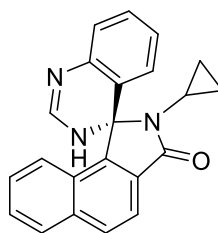

**4aaa**

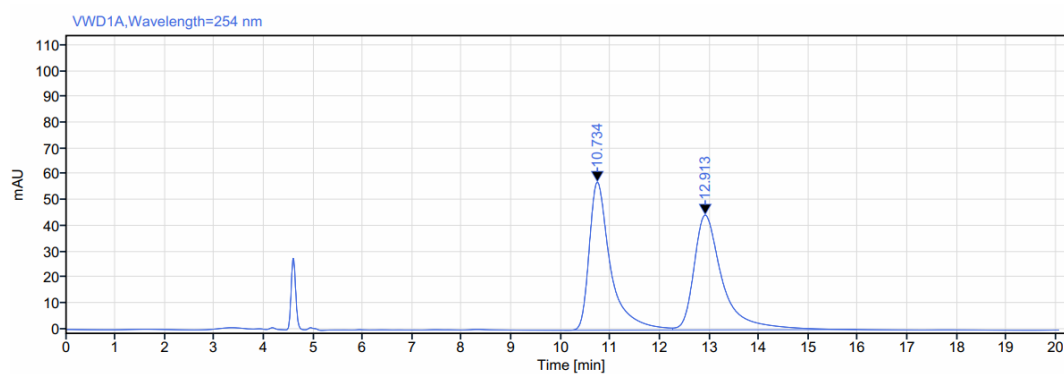

Signal: VWD1A,Wavelength=254 nm

| RT [min] | Type | Width [min] | Area    | Height | Area% | Name |
|----------|------|-------------|---------|--------|-------|------|
| 10.734   | MM m | 2.19        | 1715.23 | 57.33  | 49.06 |      |
| 12.913   | MM m | 3.72        | 1781.05 | 44.50  | 50.94 |      |
| Sum      |      |             | 3496.28 |        |       |      |

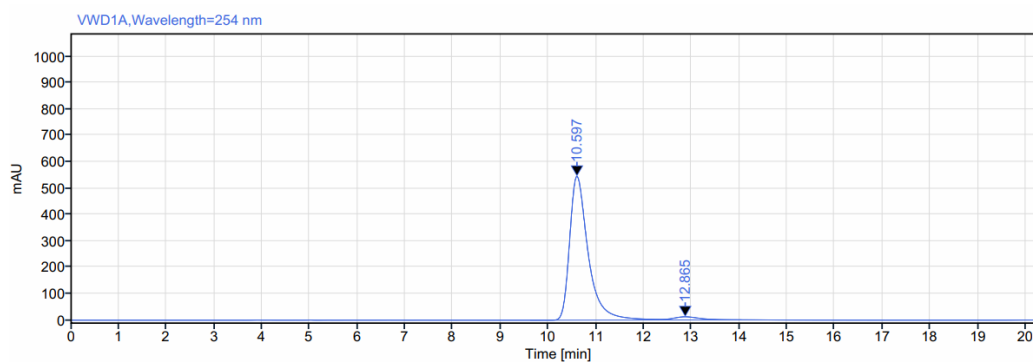

Signal: VWD1A,Wavelength=254 nm

| RT [min] | Type | Width [min] | Area     | Height | Area% | Name |
|----------|------|-------------|----------|--------|-------|------|
| 10.597   | MM m | 2.68        | 14700.17 | 545.22 | 96.96 |      |
| 12.865   | MM m | 1.75        | 460.21   | 11.85  | 3.04  |      |
| Sum      |      |             | 15160.38 |        |       |      |

HPLC (Chiralpak IC-3):  $t_R$  = 10.60 (major), 12.87 (minor)

Condition: *n*-Hexane:*i*-PrOH=60:40, flow rate 1.0 mL/min, 25 °C, 254 nm.

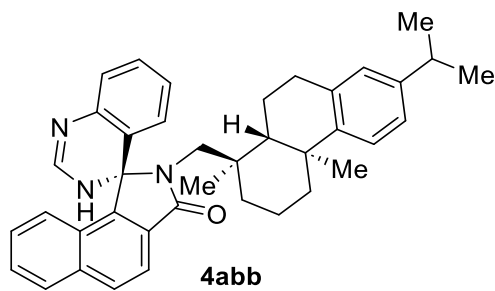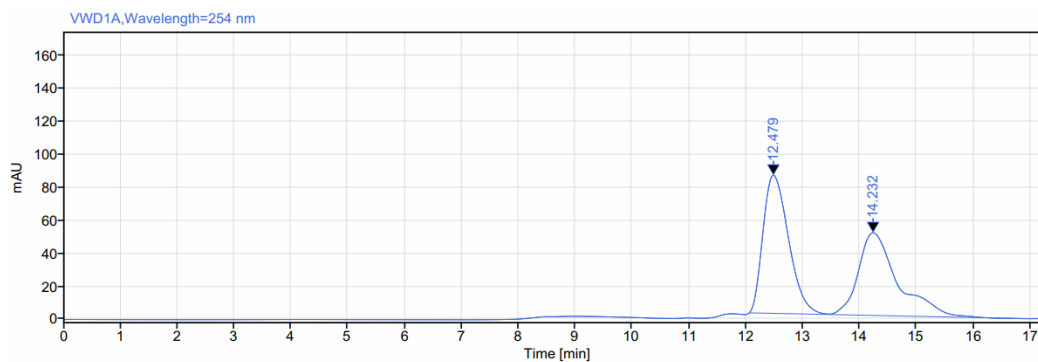

Signal: VWD1A,Wavelength=254 nm

| RT [min] | Type | Width [min] | Area    | Height | Area% | Name |
|----------|------|-------------|---------|--------|-------|------|
| 12.479   | MM m | 1.42        | 2618.51 | 83.81  | 52.17 |      |
| 14.232   | MM m | 3.53        | 2400.68 | 50.17  | 47.83 |      |
| Sum      |      |             | 5019.19 |        |       |      |

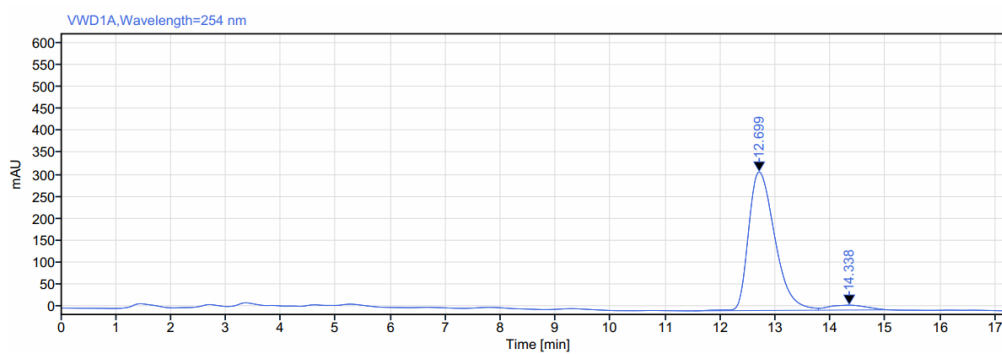

Signal: VWD1A,Wavelength=254 nm

| RT [min] | Type | Width [min] | Area     | Height | Area% | Name |
|----------|------|-------------|----------|--------|-------|------|
| 12.699   | MM m | 2.27        | 10474.14 | 315.01 | 95.13 |      |
| 14.338   | MM m | 1.28        | 536.77   | 11.15  | 4.87  |      |
| Sum      |      |             | 11010.91 |        |       |      |

HPLC (Chiralpak OD-3):  $t_R$  = 12.70 (major), 14.34 (minor)

Condition: 80:20, *n*-Hexane:*i*-PrOH, flow rate 0.5 mL/min, 25 °C, 254 nm.

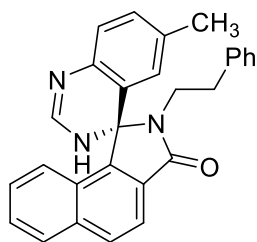

**4ba**

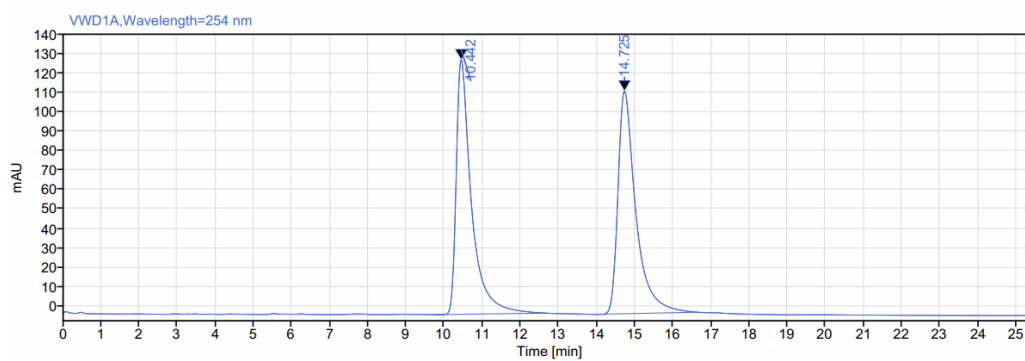

Signal: VWD1A,Wavelength=254 nm

| RT [min] | Type | Width [min] | Area    | Height | Area% | Name |
|----------|------|-------------|---------|--------|-------|------|
| 10.442   | MM m | 2.96        | 3640.10 | 131.21 | 49.38 |      |
| 14.725   | MM m | 2.73        | 3730.88 | 114.82 | 50.62 |      |
| Sum      |      |             | 7370.98 |        |       |      |

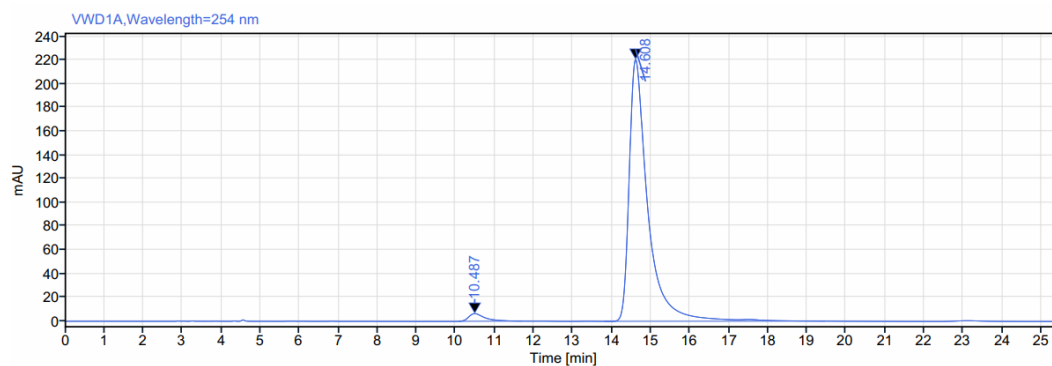

Signal: VWD1A,Wavelength=254 nm

| RT [min] | Type | Width [min] | Area    | Height | Area% | Name |
|----------|------|-------------|---------|--------|-------|------|
| 10.487   | MM m | 1.62        | 188.89  | 6.46   | 2.51  |      |
| 14.608   | MM m | 5.65        | 7351.34 | 220.71 | 97.49 |      |
| Sum      |      |             | 7540.23 |        |       |      |

HPLC (Chiralpak IA-3):  $t_R$  = 14.61 (major), 10.48 (minor)

Condition: 85:15, *n*-Hexane:*i*-PrOH, flow rate 1.0 mL/min, 25 °C, 254 nm.

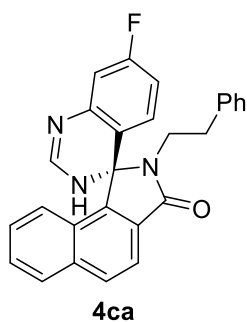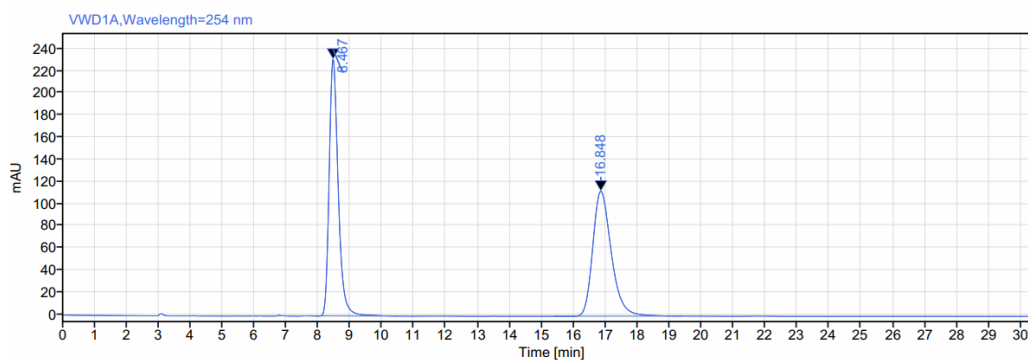

Signal: VWD1A,Wavelength=254 nm

| RT [min] | Type | Width [min] | Area    | Height | Area% | Name |
|----------|------|-------------|---------|--------|-------|------|
| 8.467    | MM m | 2.94        | 4562.85 | 231.79 | 50.09 |      |
| 16.848   | MM m | 3.99        | 4546.17 | 112.85 | 49.91 |      |
| Sum      |      |             | 9109.02 |        |       |      |

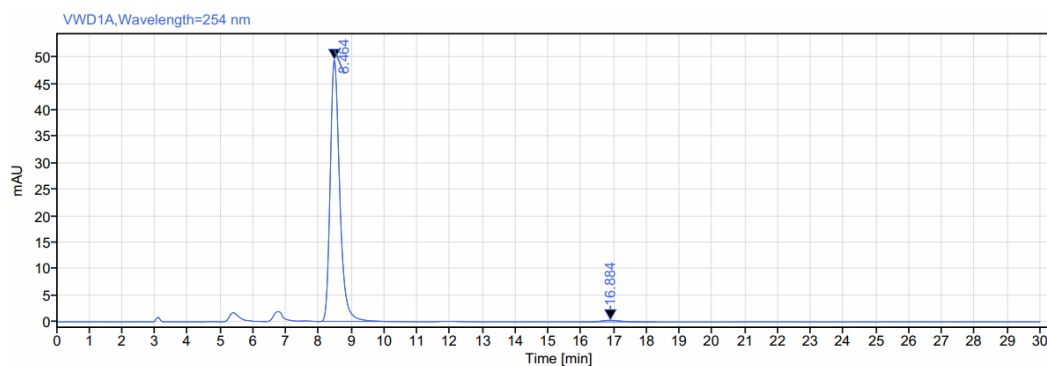

Signal: VWD1A,Wavelength=254 nm

| RT [min] | Type | Width [min] | Area    | Height | Area% | Name |
|----------|------|-------------|---------|--------|-------|------|
| 8.464    | MM m | 2.39        | 998.09  | 49.51  | 98.75 |      |
| 16.884   | MM m | 2.37        | 12.64   | 0.31   | 1.25  |      |
| Sum      |      |             | 1010.74 |        |       |      |

HPLC (Chiralpak IC-3):  $t_R$  = 8.46 (major), 16.88 (minor)

Condition: 85:15, *n*-Hexane:*i*-PrOH, flow rate 1.0 mL/min, 25 °C, 254 nm.

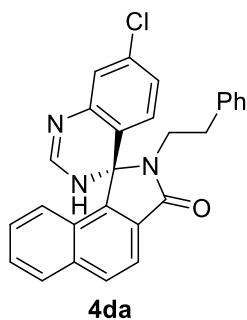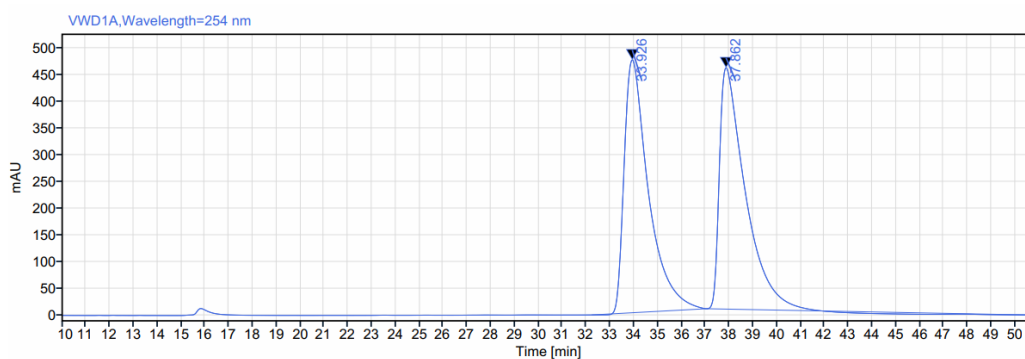

Signal: VWD1A, Wavelength=254 nm

| RT [min] | Type | Width [min] | Area     | Height | Area% | Name |
|----------|------|-------------|----------|--------|-------|------|
| 33.926   | MM m | 4.82        | 33654.07 | 474.88 | 50.25 |      |
| 37.862   | MM m | 13.51       | 33315.45 | 453.13 | 49.75 |      |
| Sum      |      |             | 66969.52 |        |       |      |

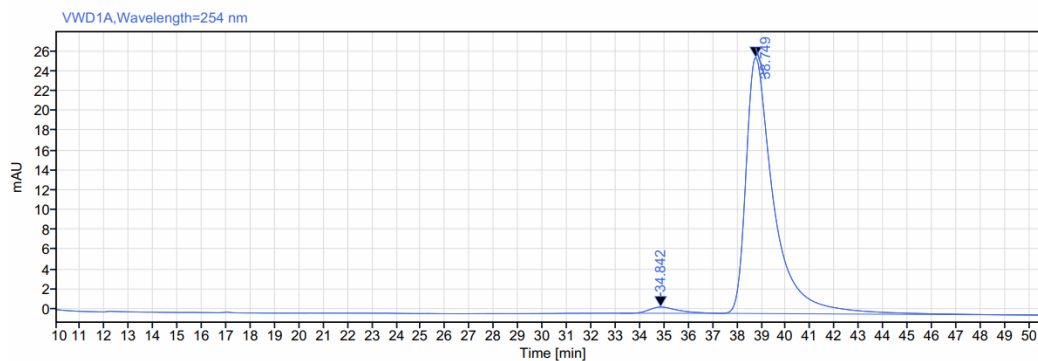

Signal: VWD1A, Wavelength=254 nm

| RT [min] | Type | Width [min] | Area    | Height | Area% | Name |
|----------|------|-------------|---------|--------|-------|------|
| 34.842   | MM m | 4.14        | 51.85   | 0.62   | 2.45  |      |
| 38.749   | MM m | 14.29       | 2062.29 | 25.79  | 97.55 |      |
| Sum      |      |             | 2114.15 |        |       |      |

HPLC (Chiralpak IA-3):  $t_R$  = 38.75 (major), 34.84 (minor)

Condition: 90:10, *n*-Hexane:*i*-PrOH, flow rate 0.7 mL/min, 25 °C, 254 nm.



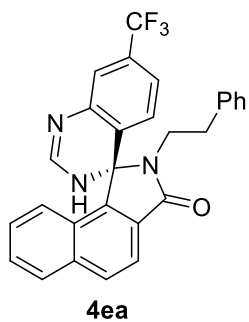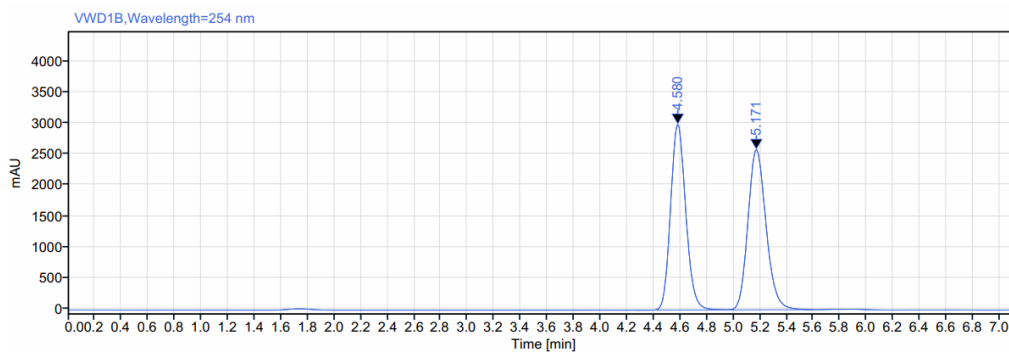

Signal: VWD1B, Wavelength=254 nm

| RT [min] | Type | Width [min] | Area     | Height  | Area% | Name |
|----------|------|-------------|----------|---------|-------|------|
| 4.580    | MM m | 0.69        | 23717.20 | 2990.63 | 49.31 |      |
| 5.171    | MM m | 0.64        | 24383.17 | 2580.21 | 50.69 |      |
| Sum      |      |             | 48100.37 |         |       |      |

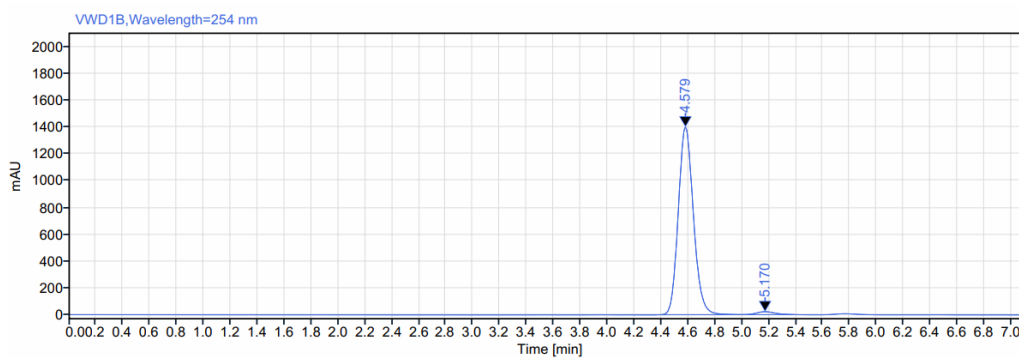

Signal: VWD1B, Wavelength=254 nm

| RT [min] | Type | Width [min] | Area     | Height  | Area% | Name |
|----------|------|-------------|----------|---------|-------|------|
| 4.579    | MM m | 0.82        | 10988.06 | 1406.50 | 98.09 |      |
| 5.170    | MM m | 0.38        | 213.40   | 22.41   | 1.91  |      |
| Sum      |      |             | 11201.46 |         |       |      |

HPLC (Chiralpak IC-3):  $t_R$  = 4.58 (major), 5.17 (minor)

Condition: *n*-Hexane:*i*-PrOH=50:50, flow rate 0.8 mL/min, 25 °C, 254 nm.

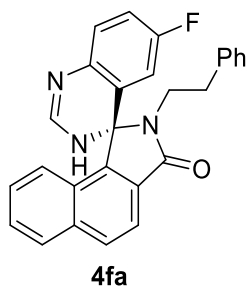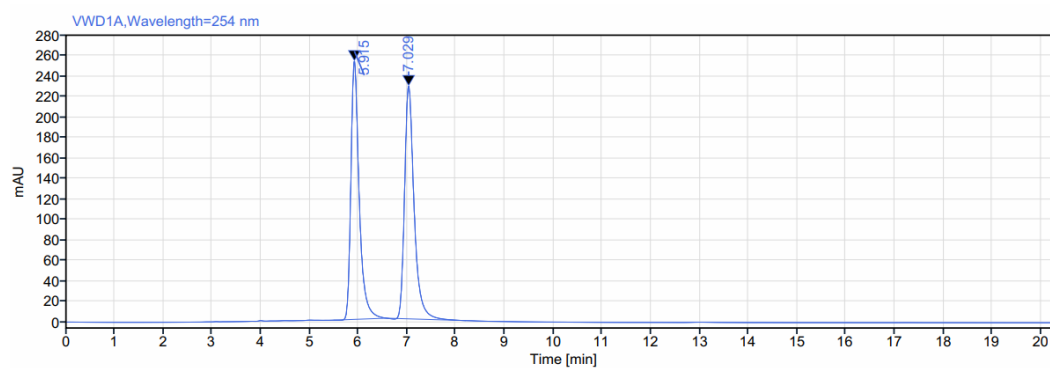

Signal: VWD1A,Wavelength=254 nm

| RT [min] | Type | Width [min] | Area    | Height | Area% | Name |
|----------|------|-------------|---------|--------|-------|------|
| 5.915    | MM m | 1.09        | 2974.99 | 251.92 | 49.03 |      |
| 7.029    | MM m | 1.63        | 3092.44 | 227.10 | 50.97 |      |
| Sum      |      |             | 6067.43 |        |       |      |

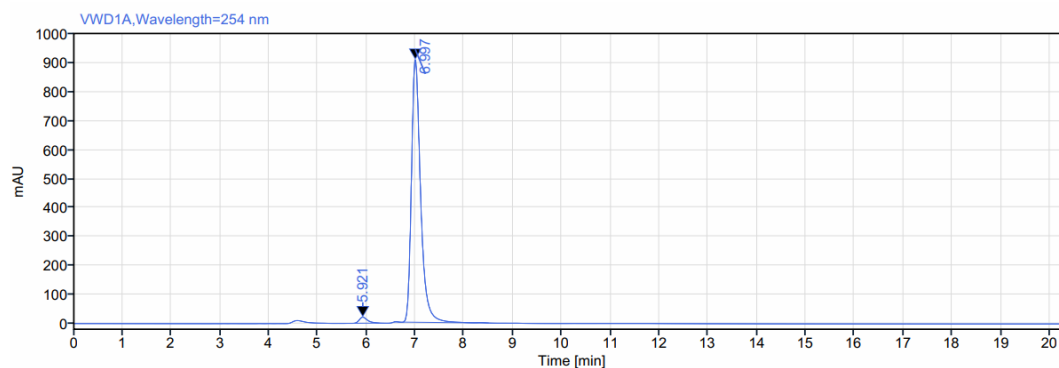

Signal: VWD1A,Wavelength=254 nm

| RT [min] | Type | Width [min] | Area     | Height | Area% | Name |
|----------|------|-------------|----------|--------|-------|------|
| 5.921    | MM m | 0.62        | 244.38   | 20.97  | 2.02  |      |
| 6.997    | MM m | 1.94        | 11872.55 | 908.77 | 97.98 |      |
| Sum      |      |             | 12116.93 |        |       |      |

HPLC (Chiralpak IA-3):  $t_R$  = 7.00 (major), 5.92 (minor)

Condition: 70:30, *n*-Hexane:*i*-PrOH, flow rate 1.0 mL/min, 25 °C, 254 nm.

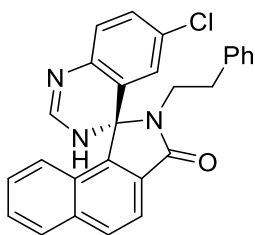

**4ga**

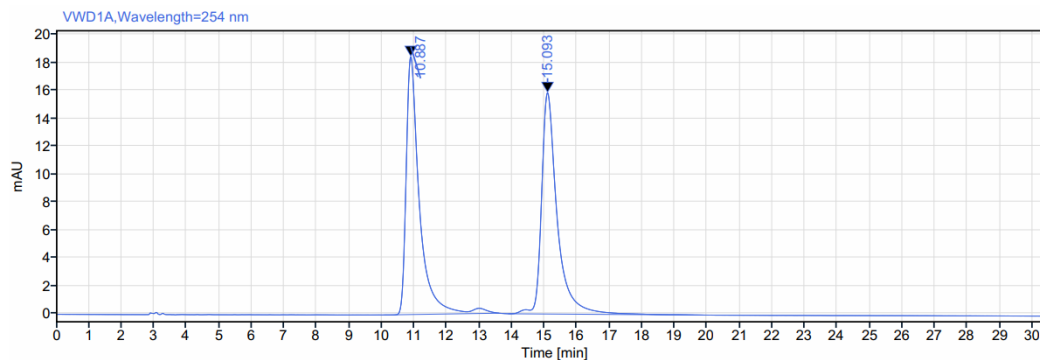

Signal: VWD1A,Wavelength=254 nm

| RT [min] | Type | Width [min] | Area    | Height | Area% | Name |
|----------|------|-------------|---------|--------|-------|------|
| 10.887   | MM m | 3.53        | 526.21  | 18.45  | 49.84 |      |
| 15.093   | MM m | 5.97        | 529.51  | 15.83  | 50.16 |      |
| Sum      |      |             | 1055.73 |        |       |      |

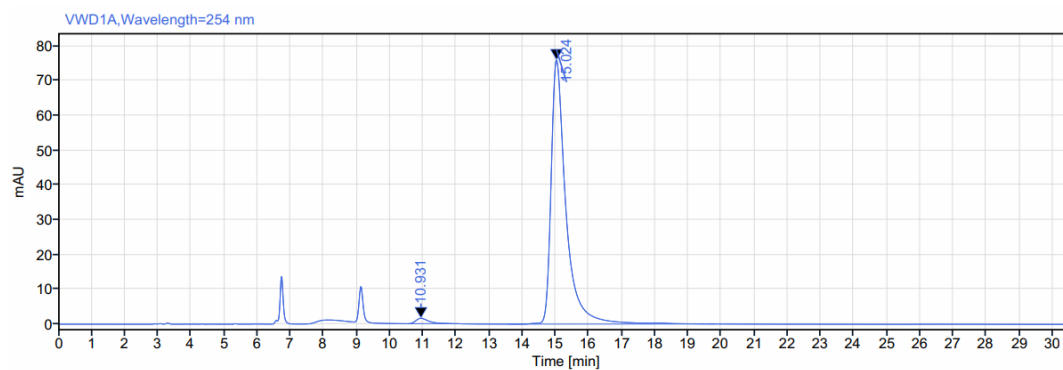

Signal: VWD1A,Wavelength=254 nm

| RT [min] | Type | Width [min] | Area    | Height | Area% | Name |
|----------|------|-------------|---------|--------|-------|------|
| 10.931   | MM m | 1.24        | 40.08   | 1.55   | 1.66  |      |
| 15.024   | MM m | 6.23        | 2375.23 | 76.04  | 98.34 |      |
| Sum      |      |             | 2415.31 |        |       |      |

HPLC (Chiralpak IA-3):  $t_R$  = 15.02 (major), 10.93 (minor)

Condition: 85:15, *n*-Hexane:*i*-PrOH, flow rate 1.0 mL/min, 25 °C, 254 nm.

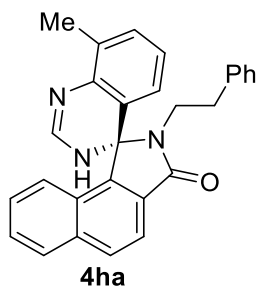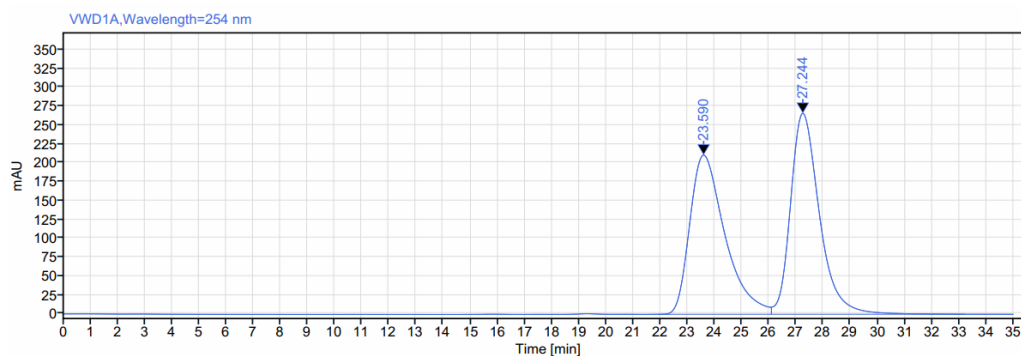

Signal: VWD1A,Wavelength=254 nm

| RT [min] | Type | Width [min] | Area     | Height | Area% | Name |
|----------|------|-------------|----------|--------|-------|------|
| 23.590   | MM m | 4.18        | 18995.82 | 211.21 | 49.11 |      |
| 27.244   | MM m | 7.13        | 19688.02 | 266.55 | 50.89 |      |
| Sum      |      |             | 38683.84 |        |       |      |

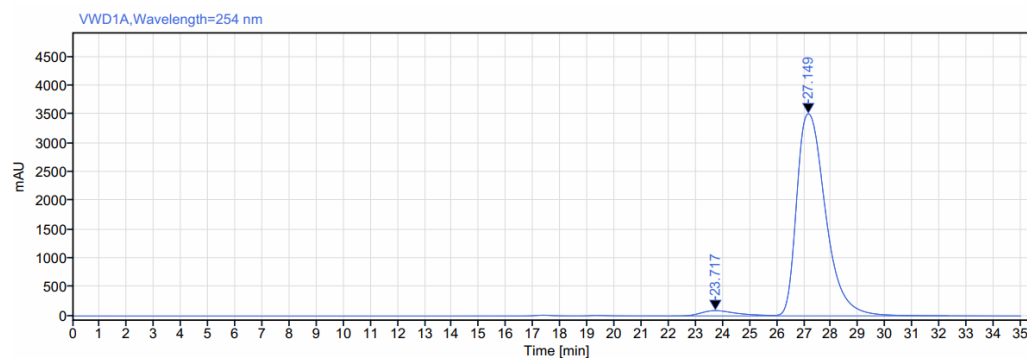

Signal: VWD1A,Wavelength=254 nm

| RT [min] | Type | Width [min] | Area      | Height  | Area% | Name |
|----------|------|-------------|-----------|---------|-------|------|
| 23.717   | MM m | 3.15        | 8132.24   | 92.69   | 3.03  |      |
| 27.149   | MM m | 7.07        | 260062.91 | 3511.61 | 96.97 |      |
| Sum      |      |             | 268195.16 |         |       |      |

HPLC (Chiralpak OD-3):  $t_R$  = 27.15 (major), 23.72 (minor)

Condition: *n*-Hexane:*i*-PrOH=60:40, flow rate 0.2 mL/min, 25 °C, 254 nm.

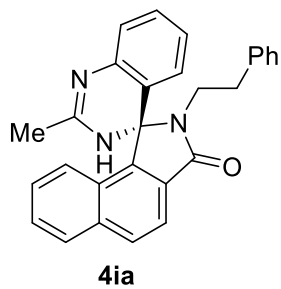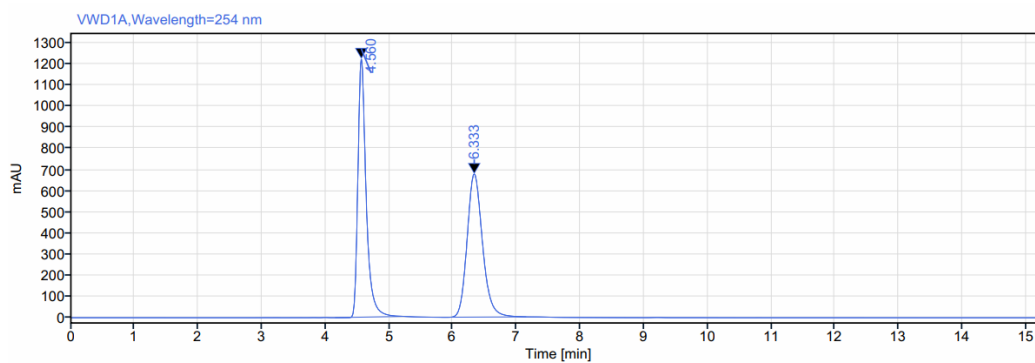

Signal: VWD1A, Wavelength=254 nm

| RT [min] | Type | Width [min] | Area     | Height  | Area% | Name |
|----------|------|-------------|----------|---------|-------|------|
| 4.560    | MM m | 1.08        | 11005.77 | 1224.02 | 49.15 |      |
| 6.333    | MM m | 1.33        | 11386.62 | 678.32  | 50.85 |      |
| Sum      |      |             | 22392.40 |         |       |      |

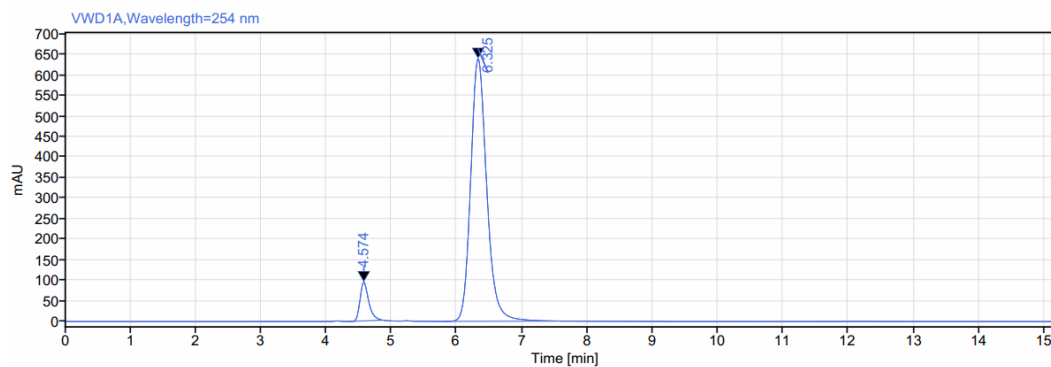

Signal: VWD1A, Wavelength=254 nm

| RT [min] | Type | Width [min] | Area     | Height | Area% | Name |
|----------|------|-------------|----------|--------|-------|------|
| 4.574    | MM m | 0.49        | 869.47   | 94.48  | 7.35  |      |
| 6.325    | MM m | 1.89        | 10953.92 | 640.09 | 92.65 |      |
| Sum      |      |             | 11823.39 |        |       |      |

HPLC (Chiralpak IA-3):  $t_R$  = 6.33 (major), 4.57 (minor)

Condition: 70:30, *n*-Hexane:*i*-PrOH, flow rate 1.0 mL/min, 25 °C, 254 nm.

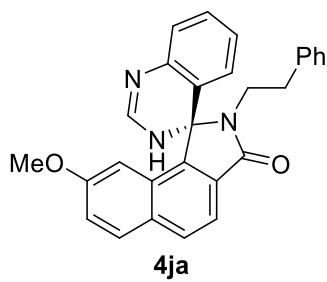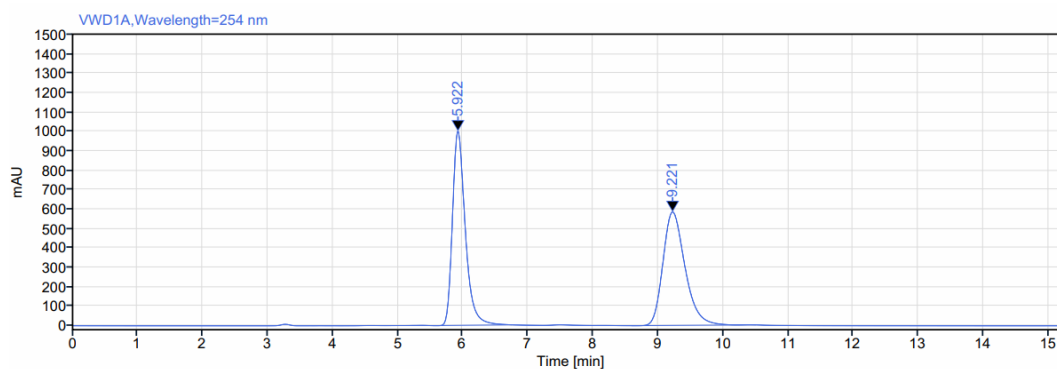

Signal: VWD1A,Wavelength=254 nm

| RT [min] | Type | Width [min] | Area     | Height  | Area% | Name |
|----------|------|-------------|----------|---------|-------|------|
| 5.922    | MM m | 1.21        | 13712.74 | 1002.32 | 49.84 |      |
| 9.221    | MM m | 1.91        | 13801.81 | 585.95  | 50.16 |      |
| Sum      |      |             | 27514.55 |         |       |      |



Signal: VWD1A,Wavelength=254 nm

| RT [min] | Type | Width [min] | Area     | Height | Area% | Name |
|----------|------|-------------|----------|--------|-------|------|
| 4.574    | MM m | 0.49        | 869.47   | 94.48  | 7.35  |      |
| 6.325    | MM m | 1.89        | 10953.92 | 640.09 | 92.65 |      |
| Sum      |      |             | 11823.39 |        |       |      |

HPLC (Chiralpak IC-3):  $t_R$  = 5.91 (major), 9.23 (minor)

Condition: *n*-Hexane:*i*-PrOH=70:30, flow rate 1.0 mL/min, 25 °C, 254 nm.

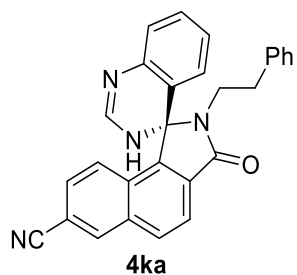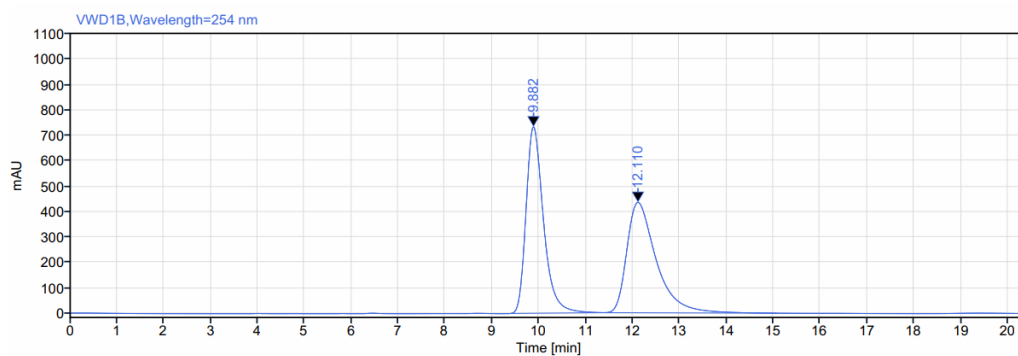

Signal: VWD1B,Wavelength=254 nm

| RT [min] | Type | Width [min] | Area     | Height | Area% | Name |
|----------|------|-------------|----------|--------|-------|------|
| 9.882    | MM m | 2.27        | 18955.98 | 734.85 | 50.02 |      |
| 12.110   | MM m | 3.73        | 18940.00 | 435.01 | 49.98 |      |
| Sum      |      |             | 37895.98 |        |       |      |

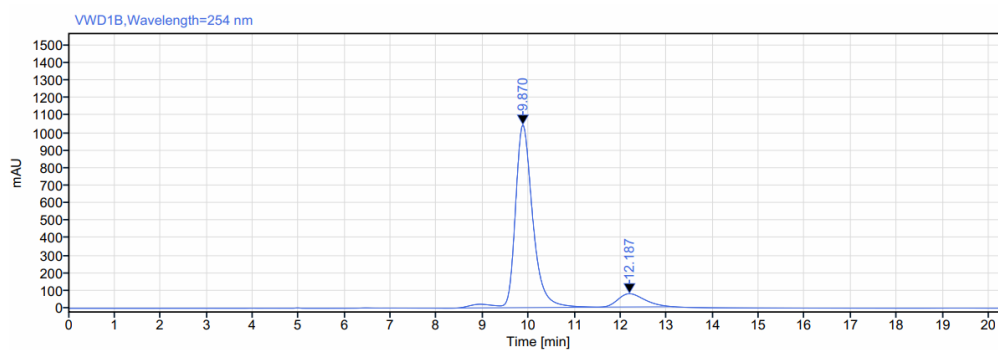

Signal: VWD1B,Wavelength=254 nm

| RT [min] | Type | Width [min] | Area     | Height  | Area% | Name |
|----------|------|-------------|----------|---------|-------|------|
| 9.870    | MM m | 3.44        | 27643.89 | 1042.66 | 90.06 |      |
| 12.187   | MM m | 1.59        | 3049.52  | 75.52   | 9.94  |      |
| Sum      |      |             | 30693.41 |         |       |      |

HPLC (Chiralpak IC-3):  $t_R$  = 9.87 (major), 12.19 (minor)

Condition: *n*-Hexane:*i*-PrOH=50:50, flow rate 0.8 mL/min, 25 °C, 254 nm.

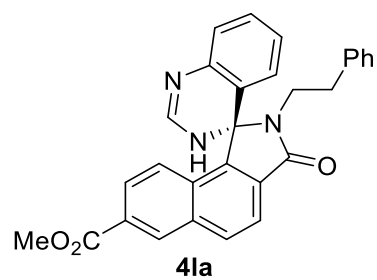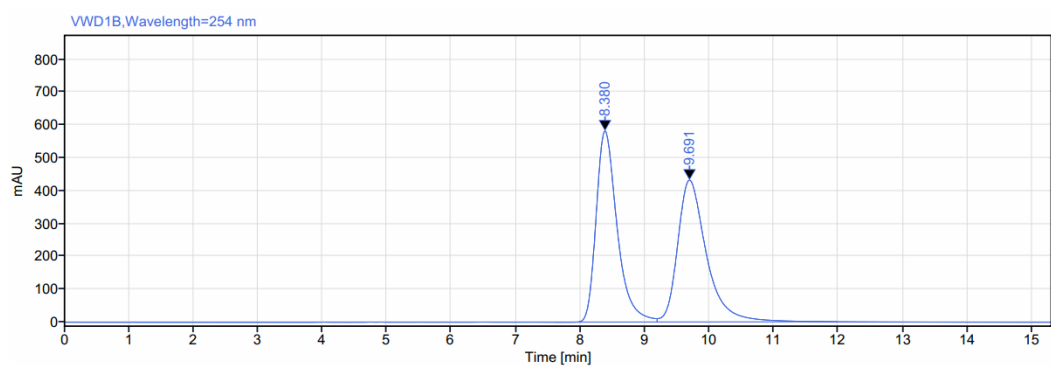

Signal: VWD1B,Wavelength=254 nm

| RT [min] | Type | Width [min] | Area     | Height | Area% | Name |
|----------|------|-------------|----------|--------|-------|------|
| 8.380    | MM m | 1.59        | 13176.09 | 582.25 | 49.56 |      |
| 9.691    | MM m | 2.79        | 13411.58 | 432.14 | 50.44 |      |
| Sum      |      |             | 26587.68 |        |       |      |

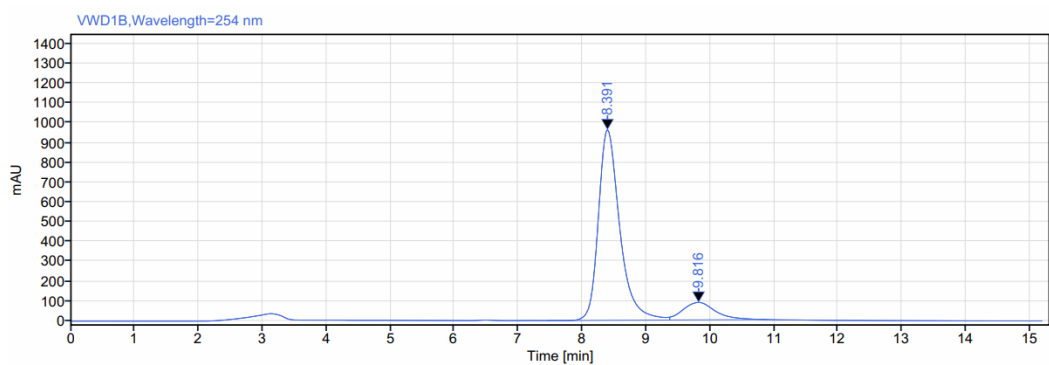

Signal: VWD1B,Wavelength=254 nm

| RT [min] | Type | Width [min] | Area     | Height | Area% | Name |
|----------|------|-------------|----------|--------|-------|------|
| 8.391    | MM m | 1.92        | 22337.10 | 961.36 | 87.73 |      |
| 9.816    | MM m | 1.52        | 3125.47  | 87.96  | 12.27 |      |
| Sum      |      |             | 25462.57 |        |       |      |

HPLC (Chiralpak IC-3):  $t_R$  = 8.39 (major), 9.82 (minor)

Condition: *n*-Hexane:*i*-PrOH=50:50, flow rate 0.8 mL/min, 25 °C, 254 nm.



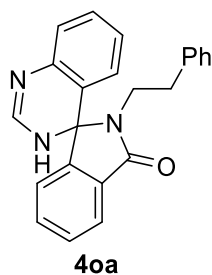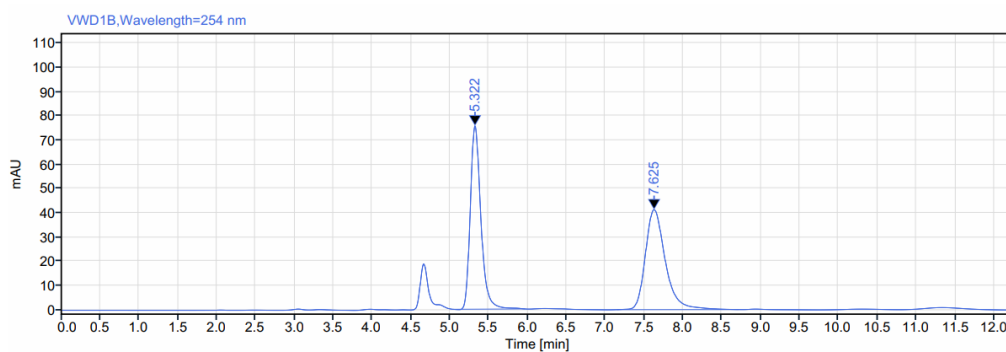

Signal: VWD1B,Wavelength=254 nm

| RT [min] | Type | Width [min] | Area    | Height | Area% | Name |
|----------|------|-------------|---------|--------|-------|------|
| 5.322    | MM m | 0.93        | 715.35  | 75.63  | 49.37 |      |
| 7.625    | MM m | 1.56        | 733.48  | 41.24  | 50.63 |      |
| Sum      |      |             | 1448.84 |        |       |      |

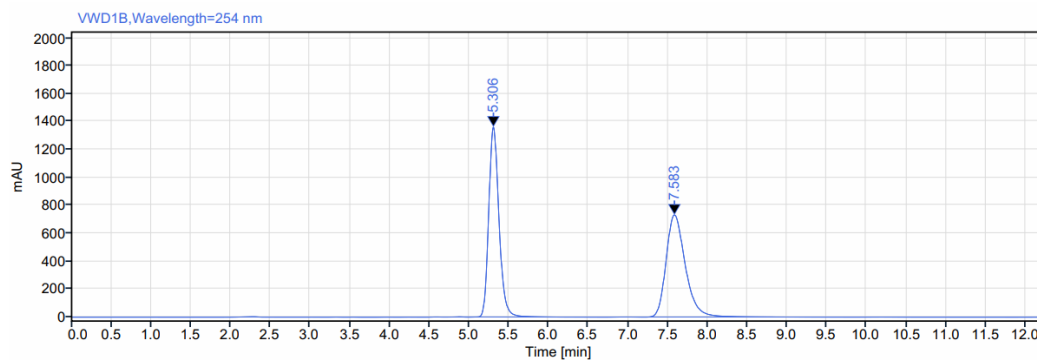

Signal: VWD1B,Wavelength=254 nm

| RT [min] | Type | Width [min] | Area     | Height  | Area% | Name |
|----------|------|-------------|----------|---------|-------|------|
| 5.306    | MM m | 1.39        | 12192.51 | 1361.73 | 49.86 |      |
| 7.583    | MM m | 1.85        | 12259.28 | 731.48  | 50.14 |      |
| Sum      |      |             | 24451.79 |         |       |      |

HPLC (Chiralpak IC-3):  $t_R$  = 5.31 (major), 7.58 (minor)

Condition: *n*-Hexane:*i*-PrOH=50:50, flow rate 0.8 mL/min, 25 °C, 254 nm.

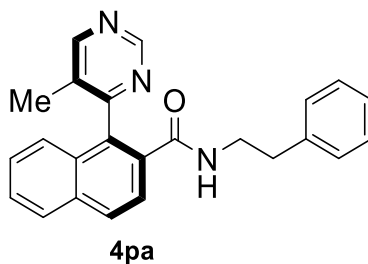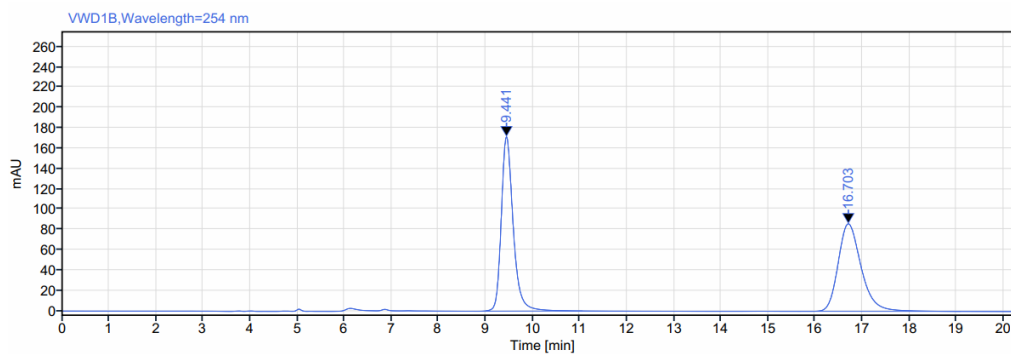

Signal: VWD1B, Wavelength=254 nm

| RT [min] | Type | Width [min] | Area    | Height | Area% | Name |
|----------|------|-------------|---------|--------|-------|------|
| 9.441    | MM m | 2.46        | 3025.14 | 171.68 | 50.84 |      |
| 16.703   | MM m | 3.85        | 2924.71 | 86.18  | 49.16 |      |
| Sum      |      |             | 5949.86 |        |       |      |

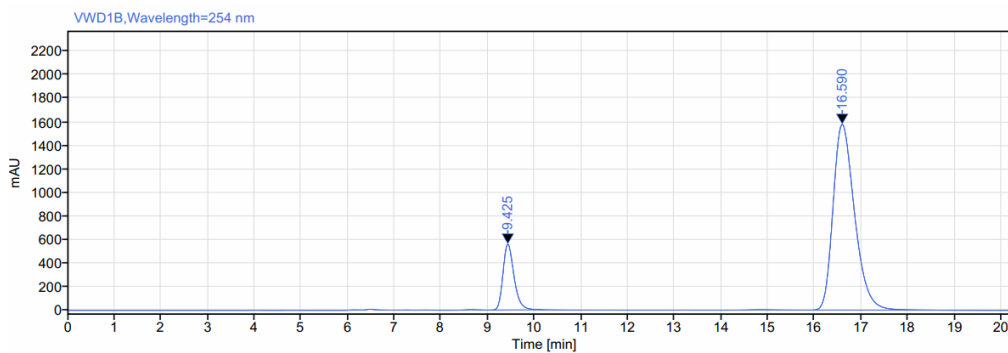

Signal: VWD1B, Wavelength=254 nm

| RT [min] | Type | Width [min] | Area     | Height  | Area% | Name |
|----------|------|-------------|----------|---------|-------|------|
| 9.425    | MM m | 1.19        | 9217.65  | 560.26  | 15.42 |      |
| 16.590   | MB m | 5.50        | 50554.27 | 1580.14 | 84.58 |      |
| Sum      |      |             | 59771.91 |         |       |      |

HPLC (Chiralpak IC-3):  $t_R$  = 9.43 (major), 16.60 (minor)

Condition: *n*-Hexane:*i*-PrOH= 50:50, flow rate 0.8 mL/min, 25 °C, 254 nm.

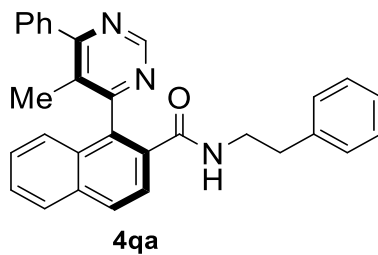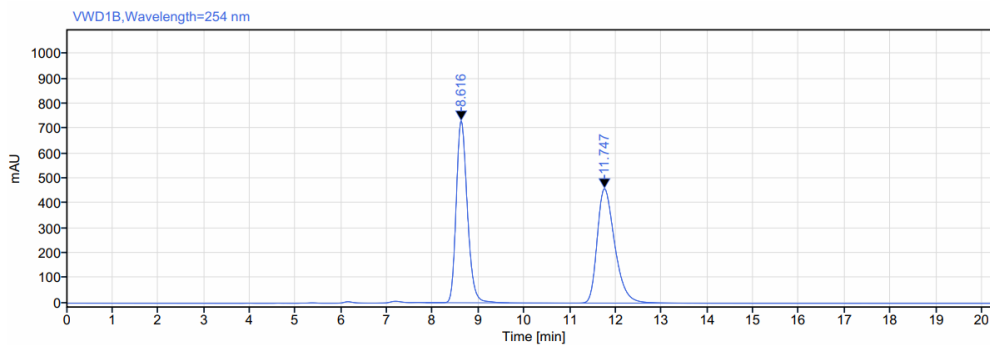

Signal: VWD1B,Wavelength=254 nm

| RT [min] | Type | Width [min] | Area     | Height | Area% | Name |
|----------|------|-------------|----------|--------|-------|------|
| 8.616    | MM m | 1.82        | 12277.30 | 729.30 | 50.02 |      |
| 11.747   | MM m | 2.63        | 12265.07 | 459.15 | 49.98 |      |
| Sum      |      |             | 24542.36 |        |       |      |

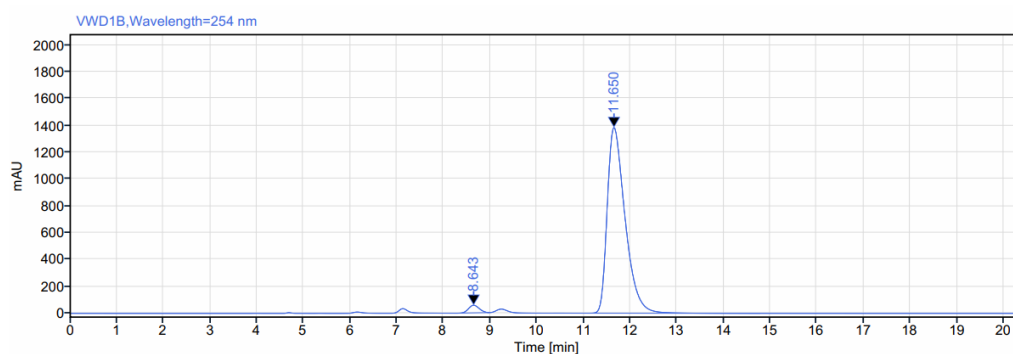

Signal: VWD1B,Wavelength=254 nm

| RT [min] | Type | Width [min] | Area     | Height  | Area% | Name |
|----------|------|-------------|----------|---------|-------|------|
| 8.643    | MM m | 0.74        | 897.09   | 56.87   | 2.38  |      |
| 11.650   | BB   | 3.71        | 36751.27 | 1383.54 | 97.62 |      |
| Sum      |      |             | 37648.36 |         |       |      |

HPLC (Chiralpak IC-3):  $t_R$  = 8.64 (major), 11.65 (minor)

Condition: *n*-Hexane:*i*-PrOH= 50:50, flow rate 0.8 mL/min, 25 °C, 254 nm.

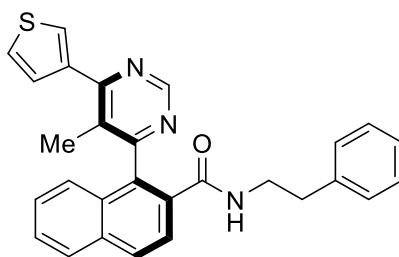

**4ra**

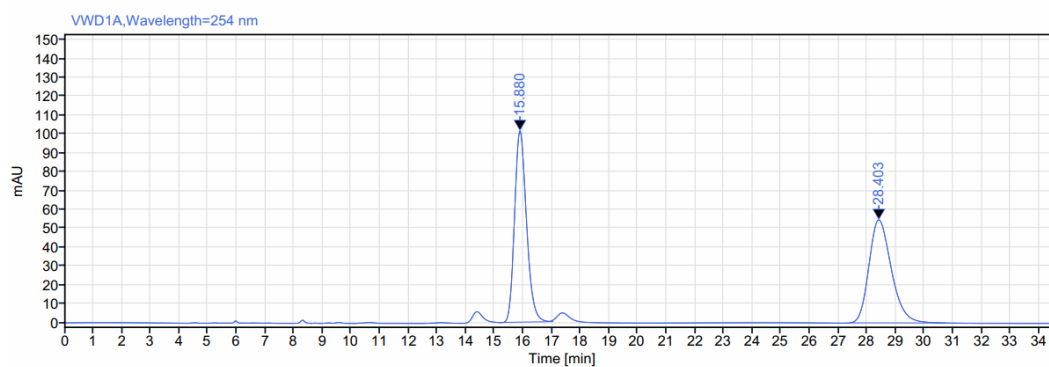

Signal: VWD1A,Wavelength=254 nm

| RT [min] | Type | Width [min] | Area    | Height | Area% | Name |
|----------|------|-------------|---------|--------|-------|------|
| 15.880   | MM m | 1.90        | 2933.49 | 101.38 | 49.79 |      |
| 28.403   | MM m | 3.33        | 2958.03 | 54.62  | 50.21 |      |
| Sum      |      |             | 5891.52 |        |       |      |

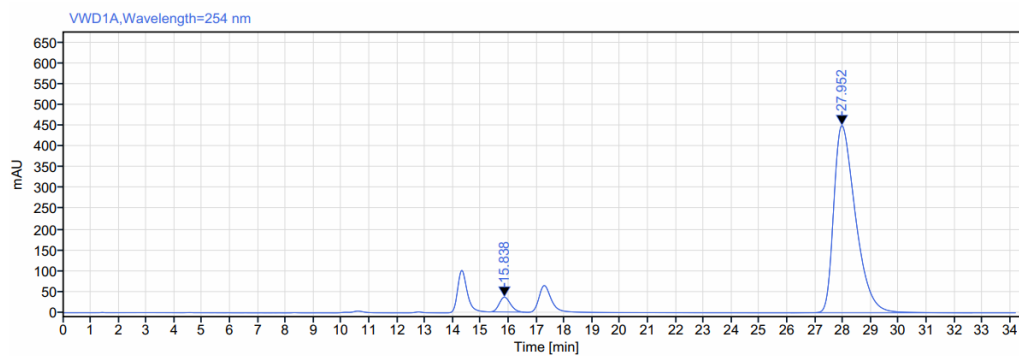

Signal: VWD1A,Wavelength=254 nm

| RT [min] | Type | Width [min] | Area     | Height | Area% | Name |
|----------|------|-------------|----------|--------|-------|------|
| 15.838   | MM m | 1.19        | 993.00   | 35.50  | 3.90  |      |
| 27.952   | MM m | 6.53        | 24437.49 | 450.45 | 96.10 |      |
| Sum      |      |             | 25430.49 |        |       |      |

HPLC (Chiralpak IC-3):  $t_R$  = 15.84 (major), 27.95 (minor)

Condition: *n*-Hexane:*i*-PrOH= 70:30, flow rate 0.7 mL/min, 25 °C, 254 nm.

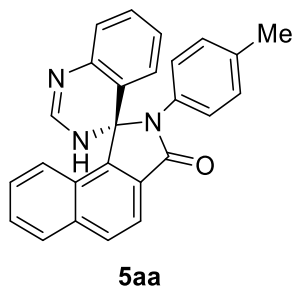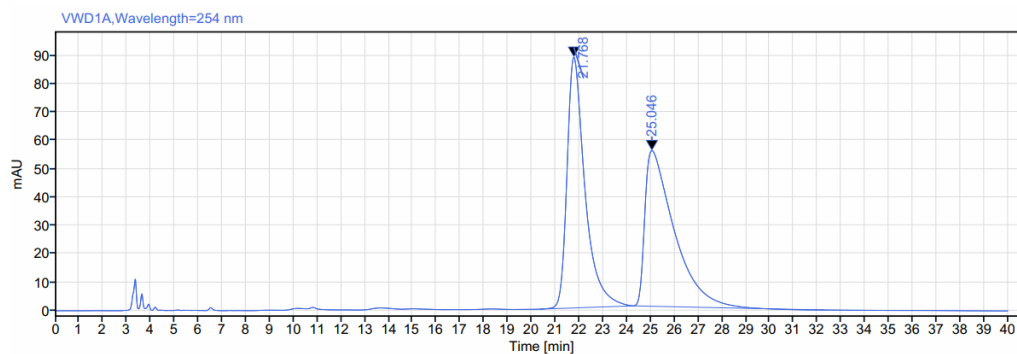

Signal: VWD1A,Wavelength=254 nm

| RT [min] | Type | Width [min] | Area    | Height | Area% | Name |
|----------|------|-------------|---------|--------|-------|------|
| 21.768   | MM m | 3.93        | 4631.29 | 88.47  | 49.70 |      |
| 25.046   | MM m | 8.03        | 4686.57 | 54.90  | 50.30 |      |
| Sum      |      |             | 9317.86 |        |       |      |

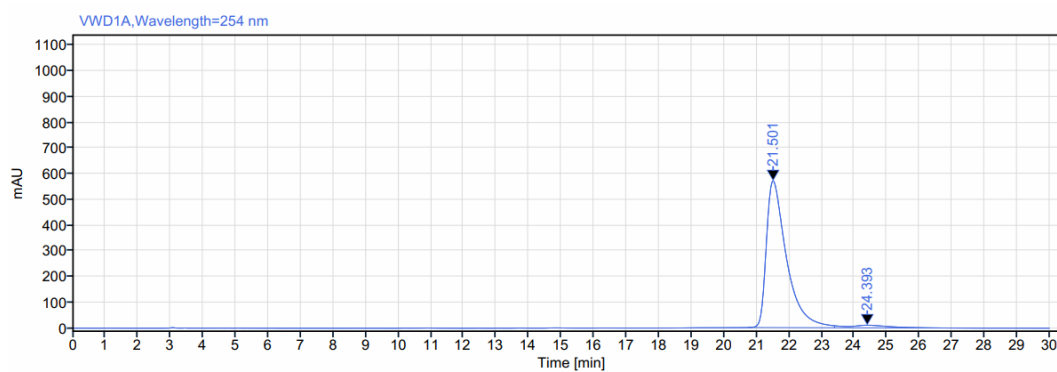

Signal: VWD1A,Wavelength=254 nm

| RT [min] | Type | Width [min] | Area     | Height | Area% | Name |
|----------|------|-------------|----------|--------|-------|------|
| 21.501   | MM m | 2.66        | 24543.74 | 570.54 | 96.54 |      |
| 24.393   | MM m | 3.46        | 878.83   | 10.09  | 3.46  |      |
| Sum      |      |             | 25422.57 |        |       |      |

HPLC (Chiralpak IA-3):  $t_R$  = 21.50 (major), 24.39 (minor)

Condition: 80:20, *n*-Hexane:*i*-PrOH, flow rate 1.0 mL/min, 25 °C, 254 nm.

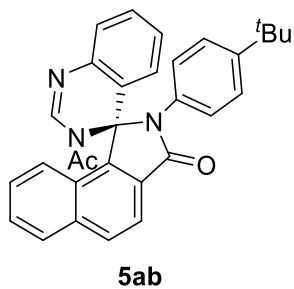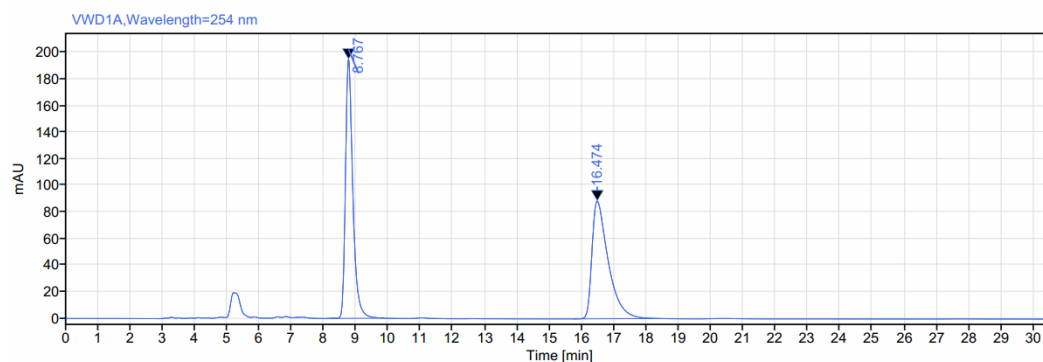

Signal: VWD1A,Wavelength=254 nm

| RT [min] | Type | Width [min] | Area    | Height | Area% | Name |
|----------|------|-------------|---------|--------|-------|------|
| 8.767    | MM m | 1.78        | 3084.16 | 194.92 | 49.90 |      |
| 16.474   | MM m | 2.68        | 3096.70 | 88.61  | 50.10 |      |
| Sum      |      |             | 6180.86 |        |       |      |

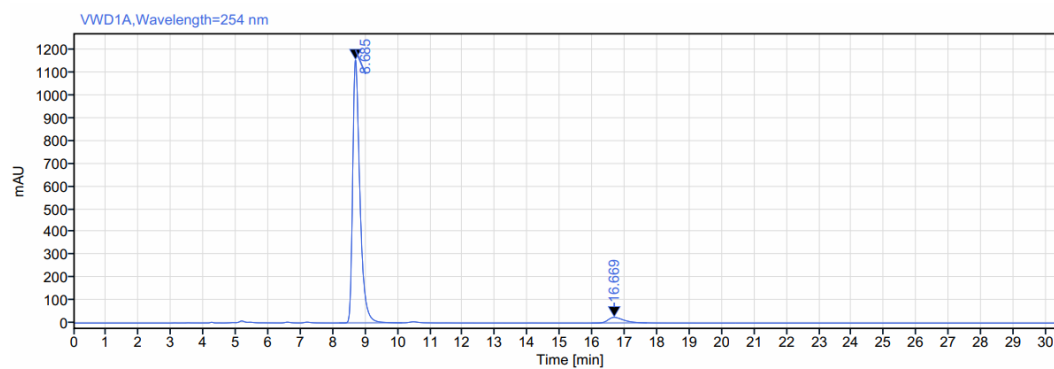

Signal: VWD1A,Wavelength=254 nm

| RT [min] | Type | Width [min] | Area     | Height  | Area% | Name |
|----------|------|-------------|----------|---------|-------|------|
| 8.685    | MM m | 1.94        | 17976.29 | 1157.35 | 95.58 |      |
| 16.669   | MM m | 1.72        | 831.70   | 24.83   | 4.42  |      |
| Sum      |      |             | 18807.99 |         |       |      |

HPLC (Chiralpak IA-3):  $t_R$  = 8.69 (major), 16.67 (minor)

Condition: 50:50, *n*-Hexane:*i*-PrOH, flow rate 1.0 mL/min, 25 °C, 254 nm.

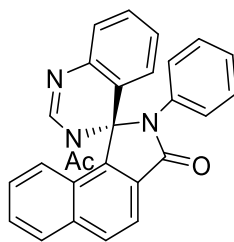

**5ac**

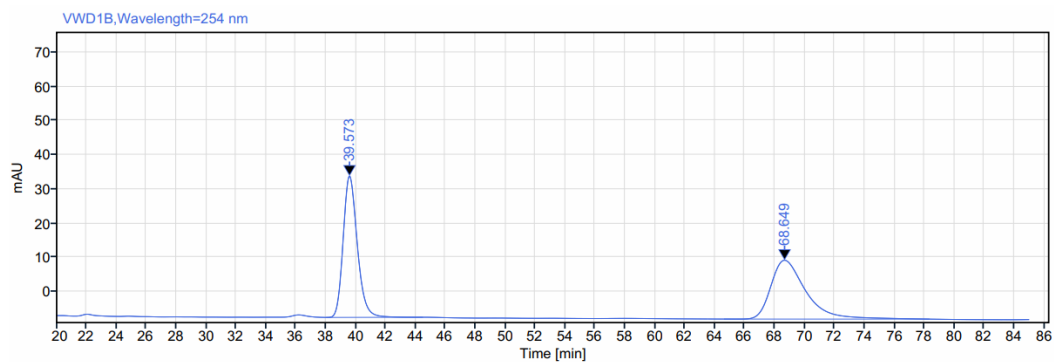

Signal: VWD1B,Wavelength=254 nm

| RT [min] | Type | Width [min] | Area    | Height | Area% | Name |
|----------|------|-------------|---------|--------|-------|------|
| 39.573   | MM m | 6.47        | 2718.29 | 41.39  | 49.34 |      |
| 68.649   | MM m | 13.73       | 2790.96 | 17.23  | 50.66 |      |
| Sum      |      |             | 5509.25 |        |       |      |

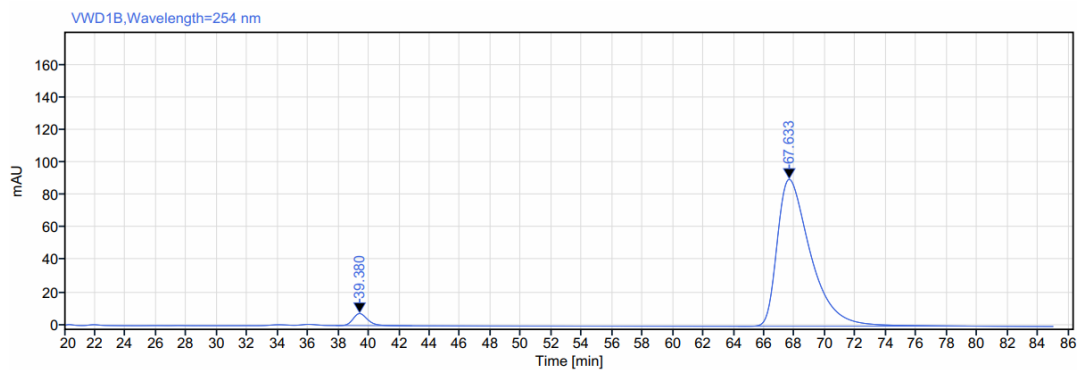

Signal: VWD1B,Wavelength=254 nm

| RT [min] | Type | Width [min] | Area     | Height | Area% | Name |
|----------|------|-------------|----------|--------|-------|------|
| 39.380   | MM m | 5.02        | 492.45   | 7.38   | 3.45  |      |
| 67.633   | MM m | 14.98       | 13769.34 | 90.25  | 96.55 |      |
| Sum      |      |             | 14261.79 |        |       |      |

HPLC (Chiralpak IC-3):  $t_R$  = 39.38 (minor), 67.63 (major)

Condition: *n*-Hexane:*i*-PrOH=40:60, flow rate 0.5 mL/min, 25 °C, 254 nm.

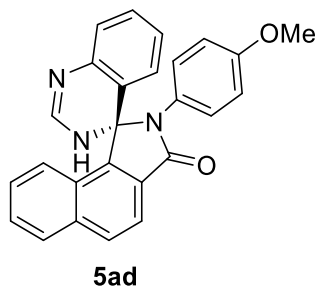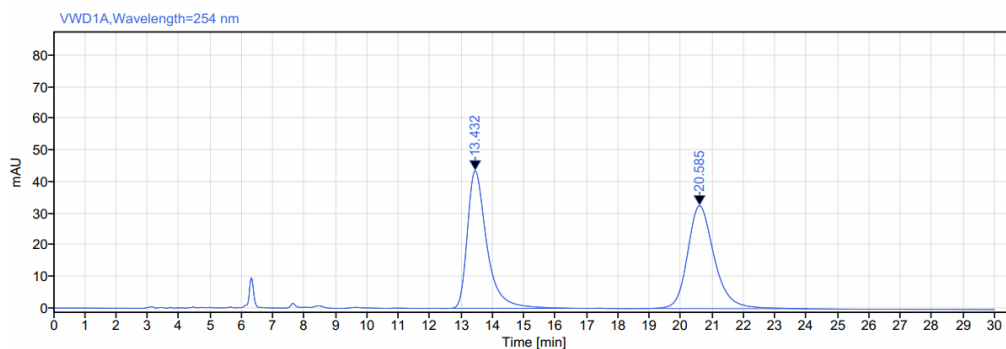

Signal: VWD1A,Wavelength=254 nm

| RT [min] | Type | Width [min] | Area    | Height | Area% | Name |
|----------|------|-------------|---------|--------|-------|------|
| 13.432   | MM m | 4.94        | 1882.35 | 43.70  | 49.36 |      |
| 20.585   | MM m | 5.31        | 1931.36 | 32.66  | 50.64 |      |
| Sum      |      |             | 3813.71 |        |       |      |

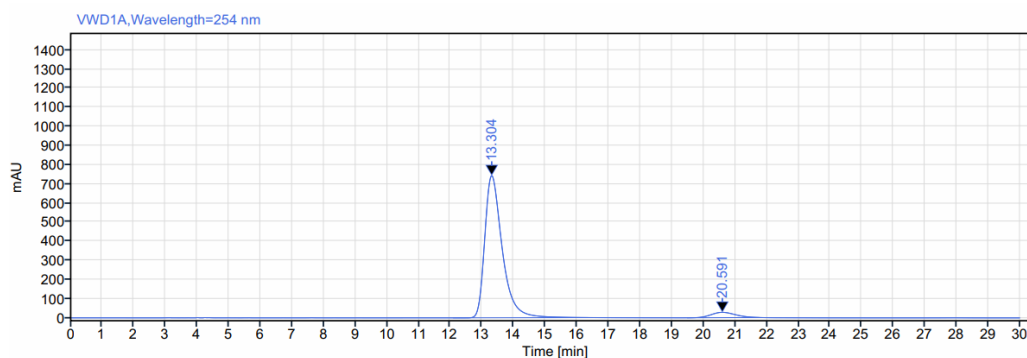

Signal: VWD1A,Wavelength=254 nm

| RT [min] | Type | Width [min] | Area     | Height | Area% | Name |
|----------|------|-------------|----------|--------|-------|------|
| 13.304   | MM m | 4.27        | 28488.22 | 743.30 | 95.04 |      |
| 20.591   | MM m | 2.28        | 1487.42  | 27.87  | 4.96  |      |
| Sum      |      |             | 29975.64 |        |       |      |

HPLC (Chiralpak IC-3):  $t_R$  = 13.30 (major), 20.59 (minor)

Condition: 70:30, *n*-Hexane:*i*-PrOH, flow rate 1.0 mL/min, 25 °C, 254 nm.



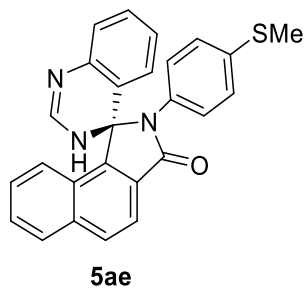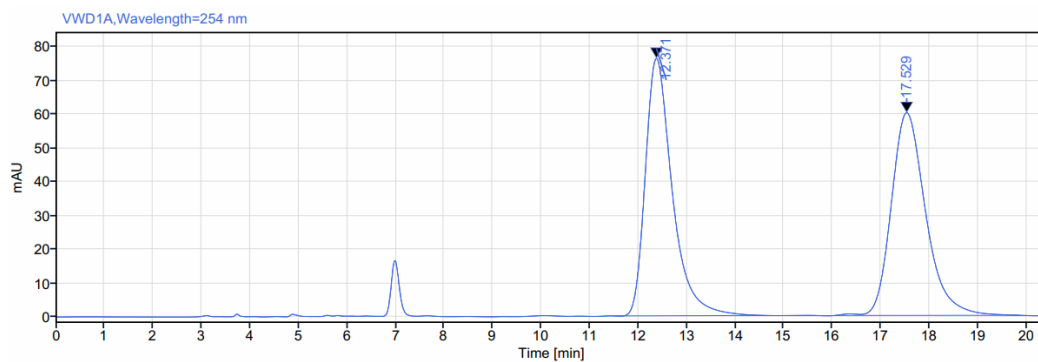

Signal: VWD1A,Wavelength=254 nm

| RT [min] | Type | Width [min] | Area    | Height | Area% | Name |
|----------|------|-------------|---------|--------|-------|------|
| 12.371   | MM m | 3.10        | 2947.04 | 76.35  | 49.92 |      |
| 17.529   | MM m | 3.80        | 2956.15 | 60.12  | 50.08 |      |
| Sum      |      |             | 5903.20 |        |       |      |

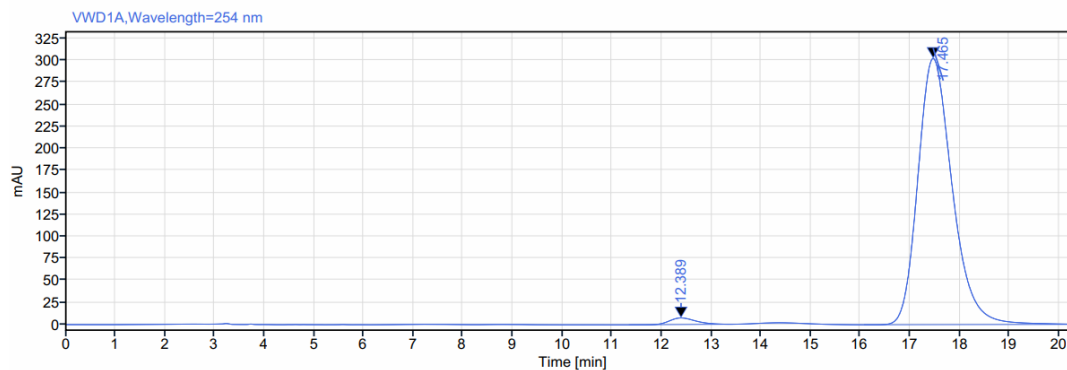

Signal: VWD1A,Wavelength=254 nm

| RT [min] | Type | Width [min] | Area     | Height | Area% | Name |
|----------|------|-------------|----------|--------|-------|------|
| 12.389   | MM m | 2.09        | 271.75   | 7.48   | 1.83  |      |
| 17.465   | MM m | 4.45        | 14563.92 | 302.62 | 98.17 |      |
| Sum      |      |             | 14835.67 |        |       |      |

HPLC (Chiralpak IC-3):  $t_R$  = 17.47 (major), 12.39 (minor)

Condition: 70:30, *n*-Hexane:*i*-PrOH, flow rate 1.0 mL/min, 25 °C, 254 nm.

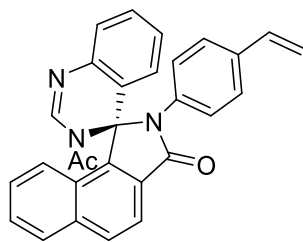

**5af**

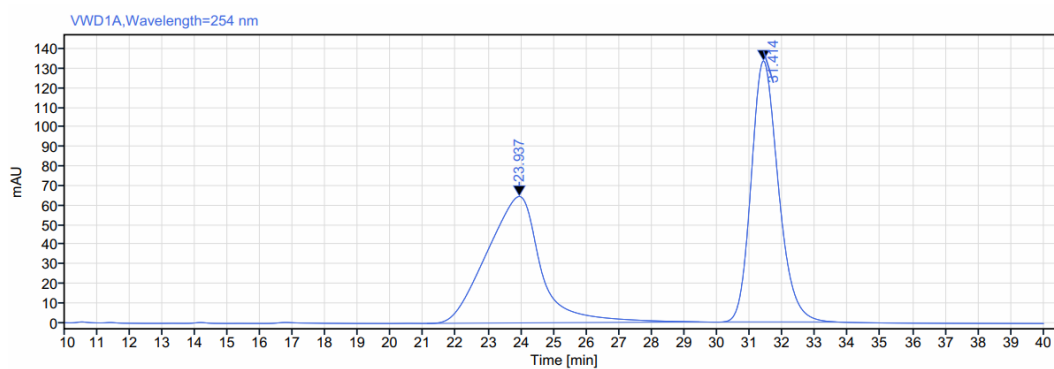

Signal: VWD1A,Wavelength=254 nm

| RT [min] | Type | Width [min] | Area     | Height | Area% | Name |
|----------|------|-------------|----------|--------|-------|------|
| 23.937   | MM m | 8.34        | 7428.37  | 64.65  | 49.13 |      |
| 31.414   | MM m | 3.43        | 7692.76  | 133.41 | 50.87 |      |
| Sum      |      |             | 15121.13 |        |       |      |

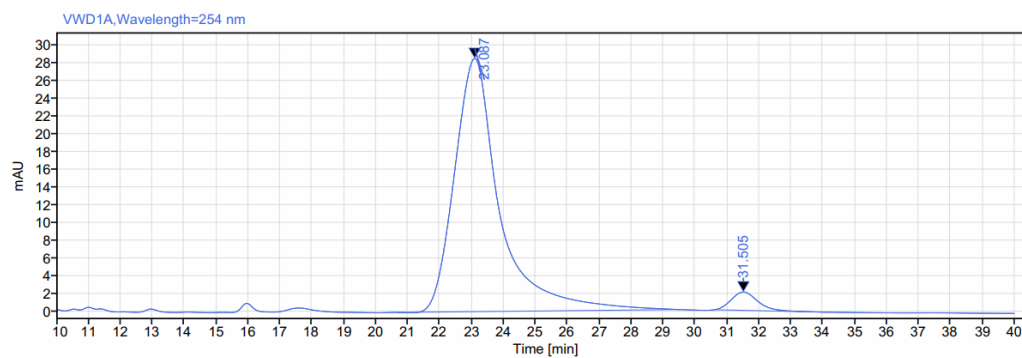

Signal: VWD1A,Wavelength=254 nm

| RT [min] | Type | Width [min] | Area    | Height | Area% | Name |
|----------|------|-------------|---------|--------|-------|------|
| 23.087   | MM m | 8.84        | 2792.09 | 28.48  | 95.92 |      |
| 31.505   | MM m | 3.56        | 118.68  | 2.06   | 4.08  |      |
| Sum      |      |             | 2910.77 |        |       |      |

HPLC (Chiralpak IA-3):  $t_R$  = 31.51 (major), 23.09 (minor)

Condition: 50:50, *n*-Hexane:*i*-PrOH, flow rate 1.0 mL/min, 25 °C, 254 nm.

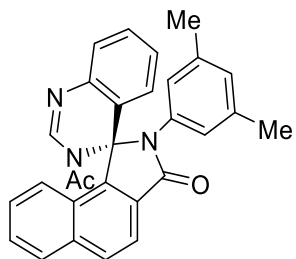

**5ag**

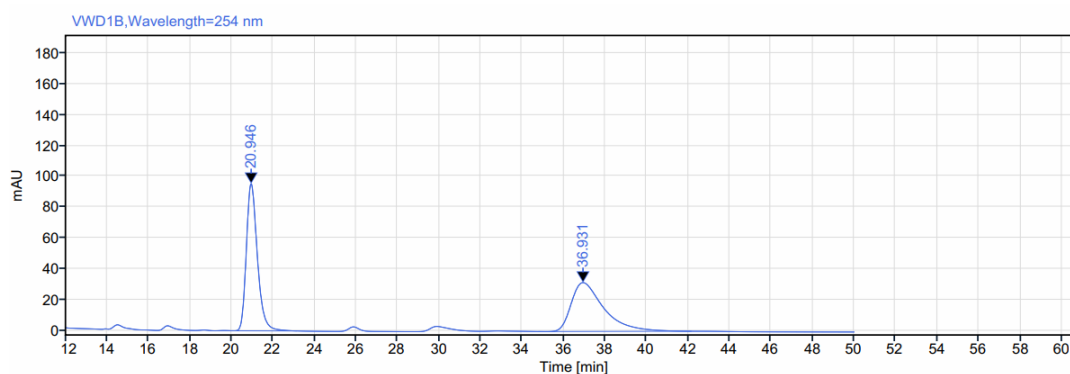

Signal: VWD1B,Wavelength=254 nm

| RT [min] | Type | Width [min] | Area    | Height | Area% | Name |
|----------|------|-------------|---------|--------|-------|------|
| 20.946   | MM m | 3.11        | 3542.72 | 95.70  | 50.60 |      |
| 36.931   | MM m | 7.37        | 3458.28 | 31.80  | 49.40 |      |
| Sum      |      |             | 7001.00 |        |       |      |

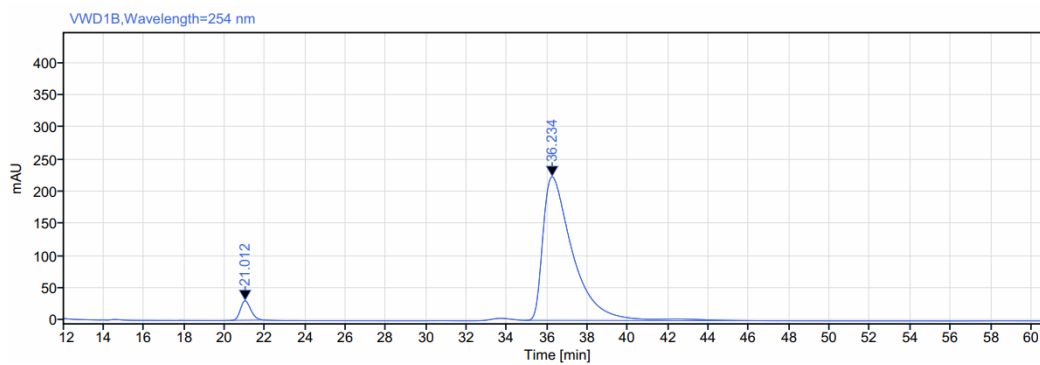

Signal: VWD1B,Wavelength=254 nm

| RT [min] | Type | Width [min] | Area     | Height | Area% | Name |
|----------|------|-------------|----------|--------|-------|------|
| 21.012   | MM m | 1.67        | 1088.17  | 30.29  | 4.51  |      |
| 36.234   | MM m | 12.64       | 23042.65 | 222.97 | 95.49 |      |
| Sum      |      |             | 24130.82 |        |       |      |

HPLC (Chiralpak IC-3):  $t_R$  = 36.24 (major), 21.01 (minor)

Condition: 40:60, *n*-Hexane:*i*-PrOH, flow rate 0.5 mL/min, 25 °C, 254 nm.

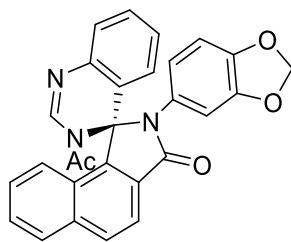

**5ah**

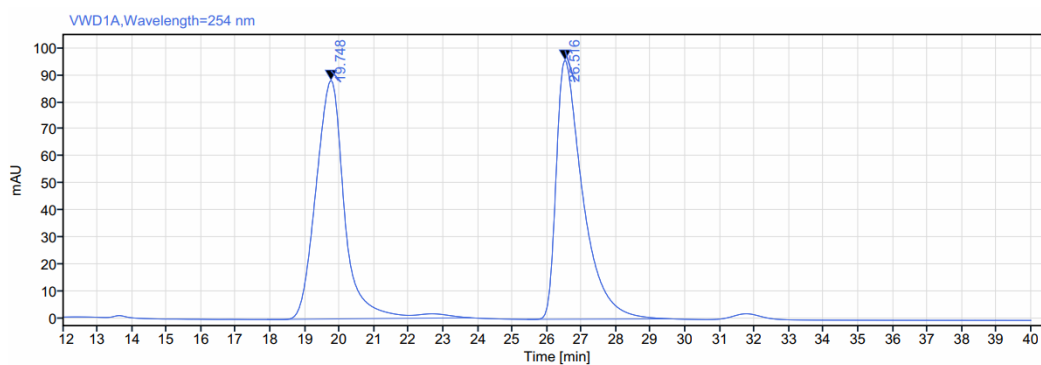

Signal: VWD1A,Wavelength=254 nm

| RT [min] | Type | Width [min] | Area     | Height | Area% | Name |
|----------|------|-------------|----------|--------|-------|------|
| 19.748   | MM m | 5.90        | 5109.49  | 88.37  | 49.95 |      |
| 26.516   | MM m | 4.18        | 5119.86  | 95.96  | 50.05 |      |
| Sum      |      |             | 10229.34 |        |       |      |

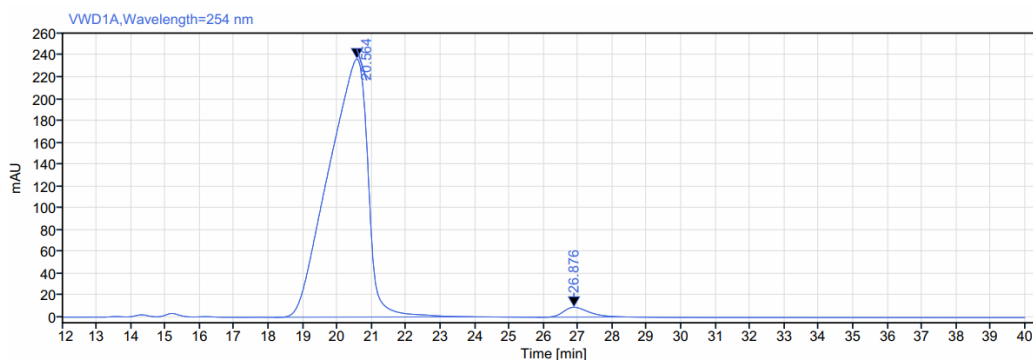

Signal: VWD1A,Wavelength=254 nm

| RT [min] | Type | Width [min] | Area     | Height | Area% | Name |
|----------|------|-------------|----------|--------|-------|------|
| 20.564   | MM m | 5.78        | 18775.32 | 236.62 | 97.57 |      |
| 26.876   | MM m | 2.65        | 467.38   | 9.09   | 2.43  |      |
| Sum      |      |             | 19242.70 |        |       |      |

HPLC (Chiralpak IA-3):  $t_R$  = 20.56 (major), 26.88 (minor)

Condition: 50:50, *n*-Hexane:*i*-PrOH, flow rate 1.0 mL/min, 25 °C, 254 nm.

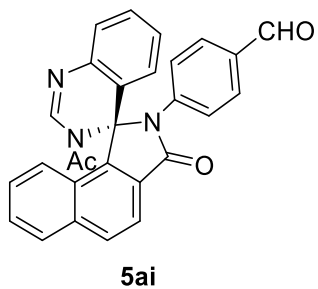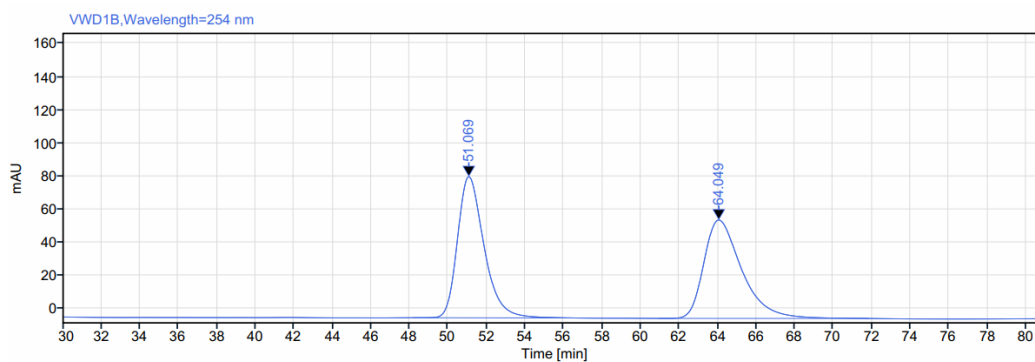

Signal: VWD1B,Wavelength=254 nm

| RT [min] | Type | Width [min] | Area     | Height | Area% | Name |
|----------|------|-------------|----------|--------|-------|------|
| 51.069   | MM m | 8.48        | 8167.37  | 85.11  | 50.17 |      |
| 64.049   | MM m | 10.90       | 8112.70  | 59.34  | 49.83 |      |
| Sum      |      |             | 16280.07 |        |       |      |

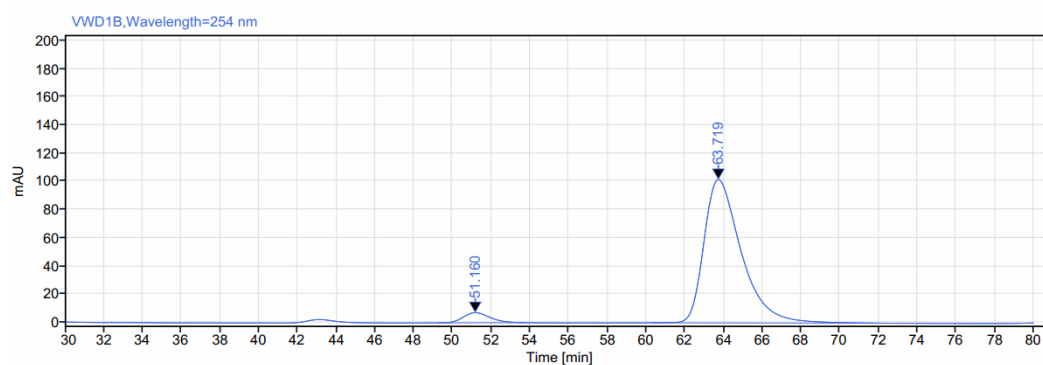

Signal: VWD1B,Wavelength=254 nm

| RT [min] | Type | Width [min] | Area     | Height | Area% | Name |
|----------|------|-------------|----------|--------|-------|------|
| 51.160   | MM m | 4.47        | 687.45   | 7.20   | 4.80  |      |
| 63.719   | MM m | 12.30       | 13627.41 | 101.78 | 95.20 |      |
| Sum      |      |             | 14314.86 |        |       |      |

HPLC (Chiralpak IC-3):  $t_R$  = 51.16 (minor), 63.72 (major)

Condition: *n*-Hexane:*i*-PrOH=40:60, flow rate 0.5 mL/min, 25 °C, 254 nm.

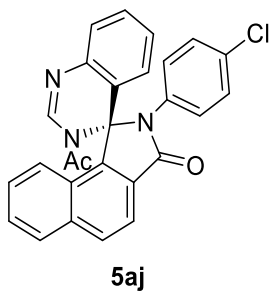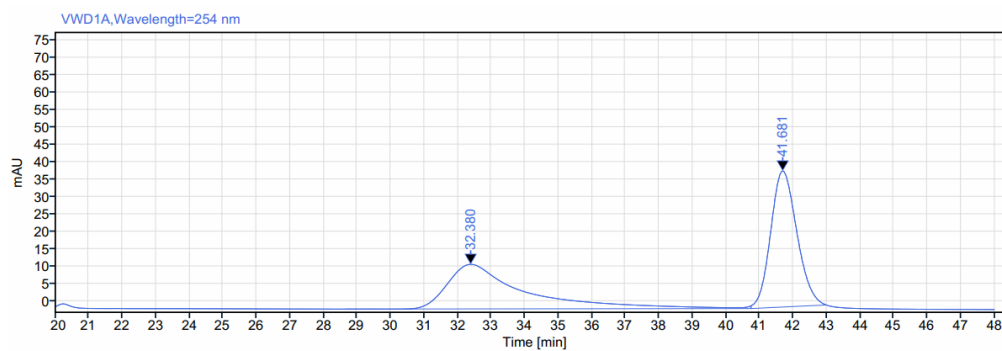

Signal: VWD1A,Wavelength=254 nm

| RT [min] | Type | Width [min] | Area    | Height | Area% | Name |
|----------|------|-------------|---------|--------|-------|------|
| 32.380   | MM m | 12.08       | 2020.59 | 12.79  | 48.84 |      |
| 41.681   | MM m | 2.24        | 2116.66 | 39.00  | 51.16 |      |
| Sum      |      |             | 4137.25 |        |       |      |

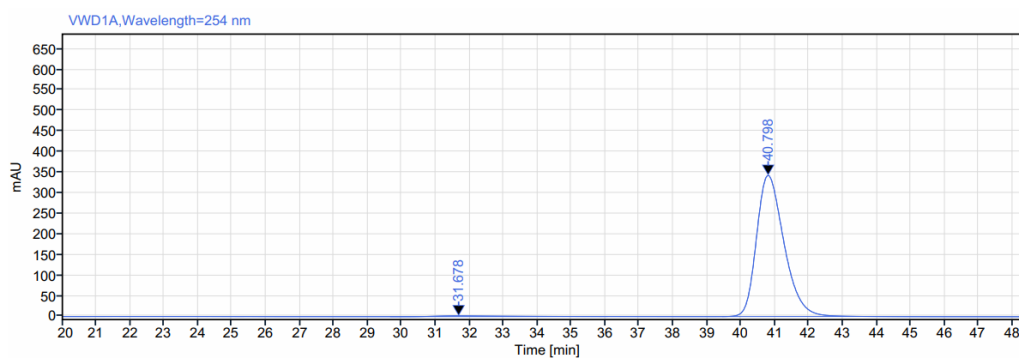

Signal: VWD1A,Wavelength=254 nm

| RT [min] | Type | Width [min] | Area     | Height | Area% | Name |
|----------|------|-------------|----------|--------|-------|------|
| 31.678   | MM m | 6.41        | 264.63   | 1.90   | 1.35  |      |
| 40.798   | MM m | 4.23        | 19269.30 | 343.02 | 98.65 |      |
| Sum      |      |             | 19533.93 |        |       |      |

HPLC (Chiralpak IA-3):  $t_R$  = 31.69 (minor), 40.80 (major)

Condition: *n*-Hexane:*i*-PrOH=50:50, flow rate 0.8 mL/min, 25 °C, 254 nm.

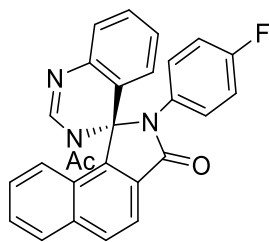

**5ak**

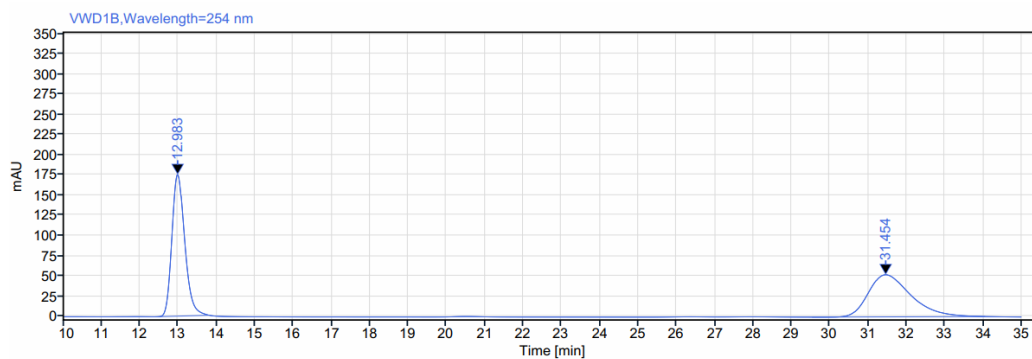

Signal: VWD1B,Wavelength=254 nm

| RT [min] | Type | Width [min] | Area    | Height | Area% | Name |
|----------|------|-------------|---------|--------|-------|------|
| 12.983   | MM m | 1.41        | 4102.51 | 175.62 | 50.49 |      |
| 31.454   | MM m | 4.51        | 4022.60 | 52.28  | 49.51 |      |
| Sum      |      |             | 8125.10 |        |       |      |

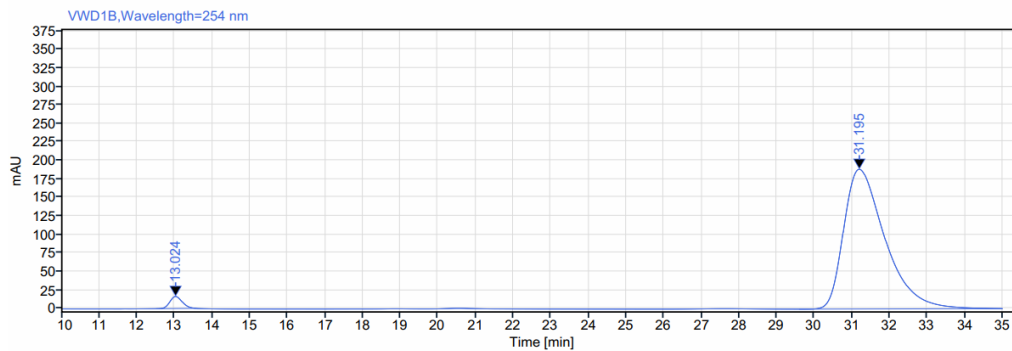

Signal: VWD1B,Wavelength=254 nm

| RT [min] | Type | Width [min] | Area     | Height | Area% | Name |
|----------|------|-------------|----------|--------|-------|------|
| 13.024   | MM m | 1.05        | 374.81   | 16.32  | 2.54  |      |
| 31.195   | MM m | 5.40        | 14399.99 | 188.69 | 97.46 |      |
| Sum      |      |             | 14774.80 |        |       |      |

HPLC (Chiralpak IC-3):  $t_R$  = 13.02 (minor), 31.20 (major)

Condition: *n*-Hexane:*i*-PrOH=50:50, flow rate 0.8 mL/min, 25 °C, 254 nm.

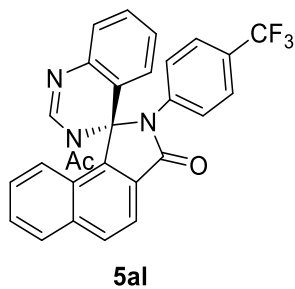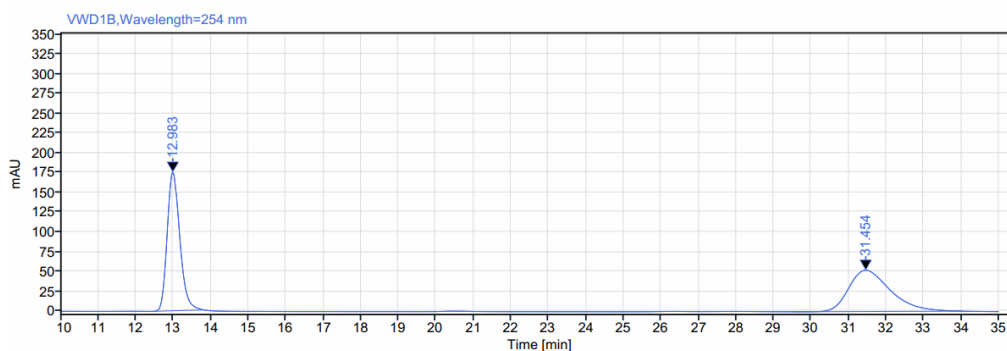

Signal: VWD1B,Wavelength=254 nm

| RT [min] | Type | Width [min] | Area    | Height | Area% | Name |
|----------|------|-------------|---------|--------|-------|------|
| 12.983   | MM m | 1.41        | 4102.51 | 175.62 | 50.49 |      |
| 31.454   | MM m | 4.51        | 4022.60 | 52.28  | 49.51 |      |
| Sum      |      |             | 8125.10 |        |       |      |

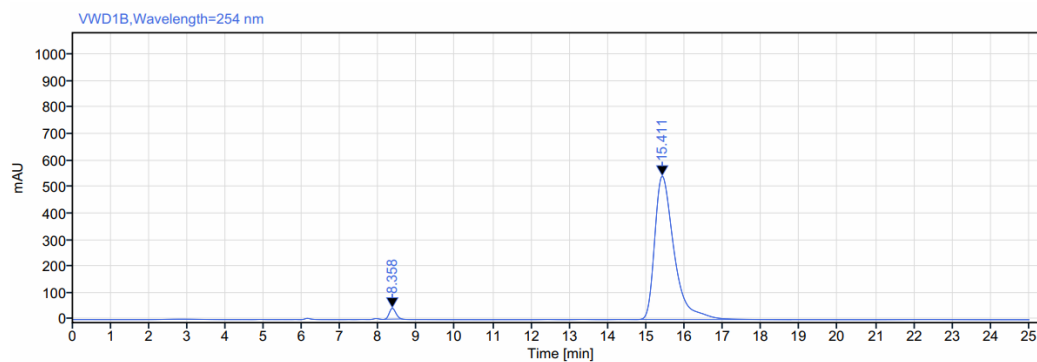

Signal: VWD1B,Wavelength=254 nm

| RT [min] | Type | Width [min] | Area     | Height | Area% | Name |
|----------|------|-------------|----------|--------|-------|------|
| 8.358    | MM m | 0.46        | 494.87   | 41.19  | 2.52  |      |
| 15.411   | MM m | 4.50        | 19112.94 | 541.00 | 97.48 |      |
| Sum      |      |             | 19607.81 |        |       |      |

HPLC (Chiralpak IC-3):  $t_R$  = 8.36 (minor), 15.41 (major)

Condition: *n*-Hexane:*i*-PrOH=50:50, flow rate 0.8 mL/min, 25 °C, 254 nm.



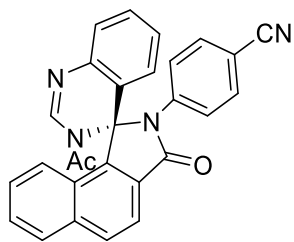

**5am**

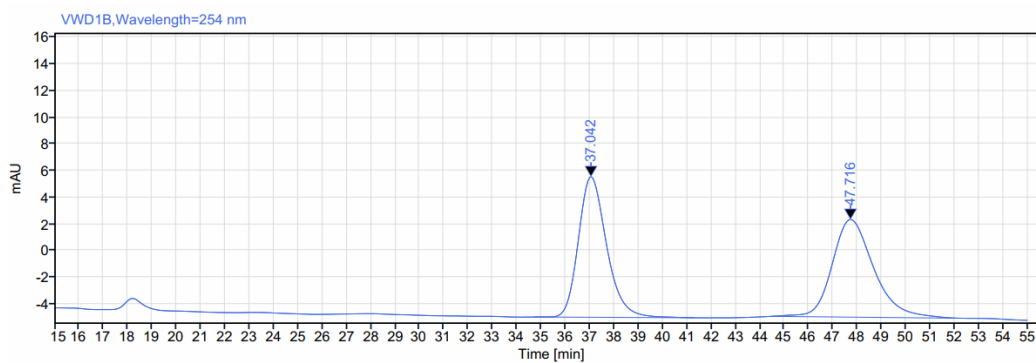

Signal: VWD1B,Wavelength=254 nm

| RT [min] | Type | Width [min] | Area    | Height | Area% | Name |
|----------|------|-------------|---------|--------|-------|------|
| 37.042   | MM m | 6.58        | 848.54  | 10.53  | 49.46 |      |
| 47.716   | MM m | 7.81        | 866.98  | 7.31   | 50.54 |      |
| Sum      |      |             | 1715.52 |        |       |      |

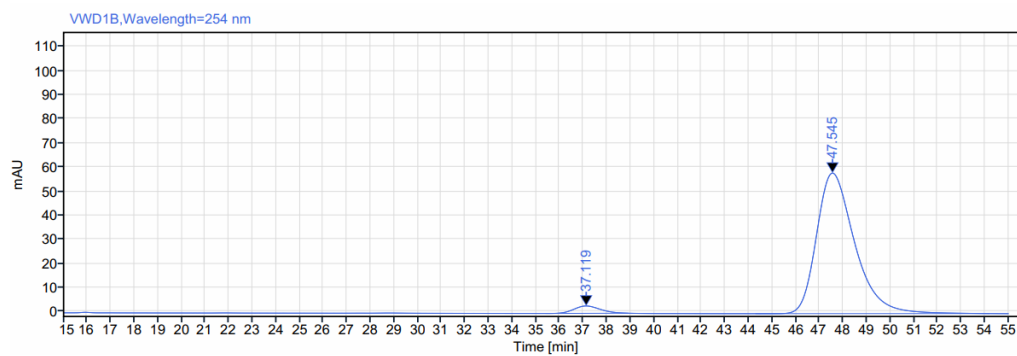

Signal: VWD1B,Wavelength=254 nm

| RT [min] | Type | Width [min] | Area    | Height | Area% | Name |
|----------|------|-------------|---------|--------|-------|------|
| 37.119   | MM m | 3.50        | 234.93  | 3.05   | 3.47  |      |
| 47.545   | MM m | 9.91        | 6536.89 | 58.34  | 96.53 |      |
| Sum      |      |             | 6771.82 |        |       |      |

HPLC (Chiralpak IC-3):  $t_R$  = 37.12 (minor), 47.55 (major)

Condition: *n*-Hexane:*i*-PrOH=50:50, flow rate 0.8 mL/min, 25 °C, 254 nm.

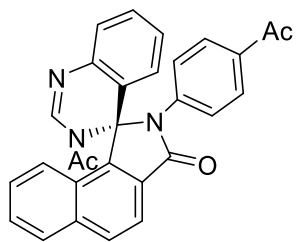

**5an**

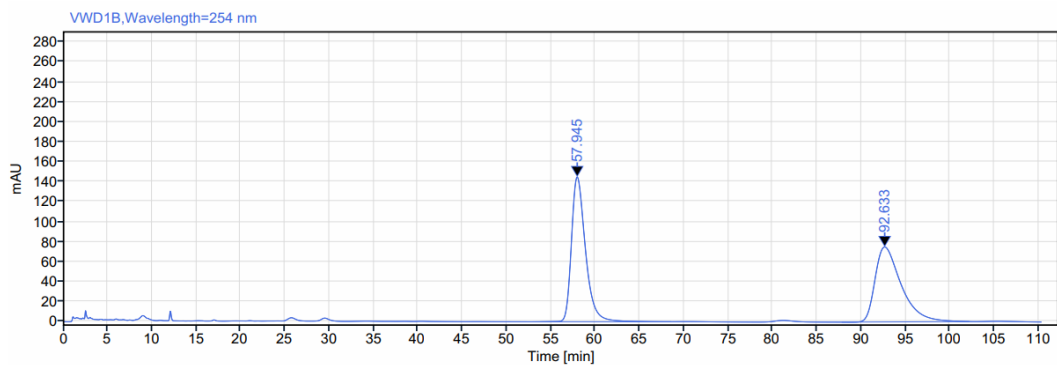

Signal: VWD1B,Wavelength=254 nm

| RT [min] | Type | Width [min] | Area     | Height | Area% | Name |
|----------|------|-------------|----------|--------|-------|------|
| 57.945   | MM m | 14.73       | 15928.73 | 144.80 | 50.94 |      |
| 92.633   | MM m | 14.39       | 15339.32 | 75.02  | 49.06 |      |
| Sum      |      |             | 31268.05 |        |       |      |

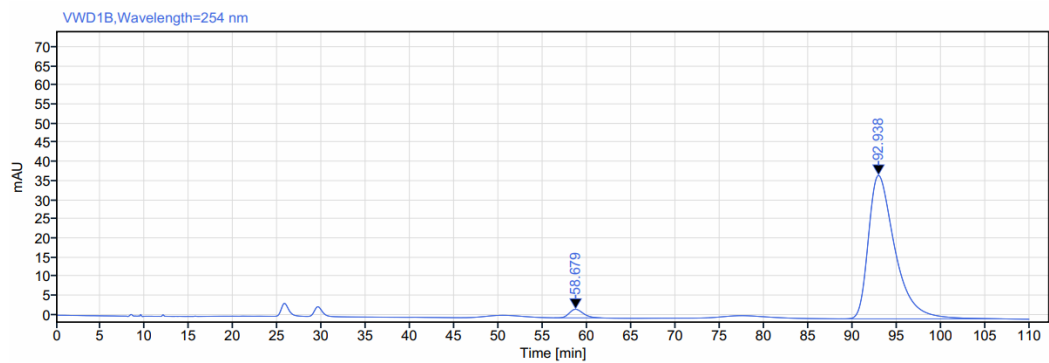

Signal: VWD1B,Wavelength=254 nm

| RT [min] | Type | Width [min] | Area    | Height | Area% | Name |
|----------|------|-------------|---------|--------|-------|------|
| 58.679   | MM m | 5.29        | 244.31  | 2.25   | 3.03  |      |
| 92.938   | MM m | 18.28       | 7826.77 | 37.52  | 96.97 |      |
| Sum      |      |             | 8071.08 |        |       |      |

HPLC (Chiralpak IC-3):  $t_R$  = 58.68 (minor), 92.94 (major)

Condition: *n*-Hexane:*i*-PrOH=40:60, flow rate 0.5 mL/min, 25 °C, 254 nm.

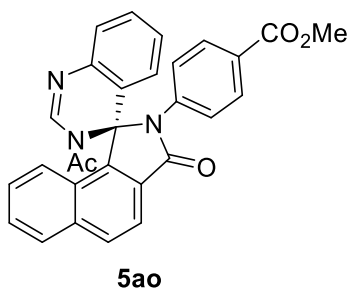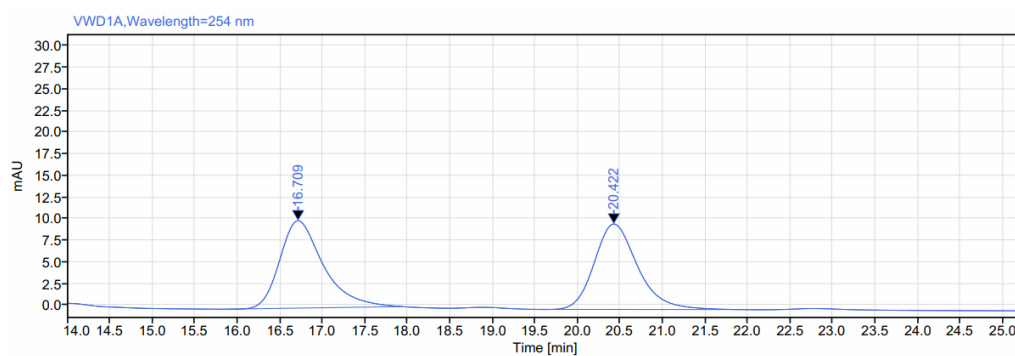

Signal: VWD1A,Wavelength=254 nm

| RT [min] | Type | Width [min] | Area   | Height | Area% | Name |
|----------|------|-------------|--------|--------|-------|------|
| 16.709   | MM m | 2.06        | 359.47 | 10.11  | 50.76 |      |
| 20.422   | MM m | 2.44        | 348.75 | 9.88   | 49.24 |      |
| Sum      |      |             | 708.22 |        |       |      |

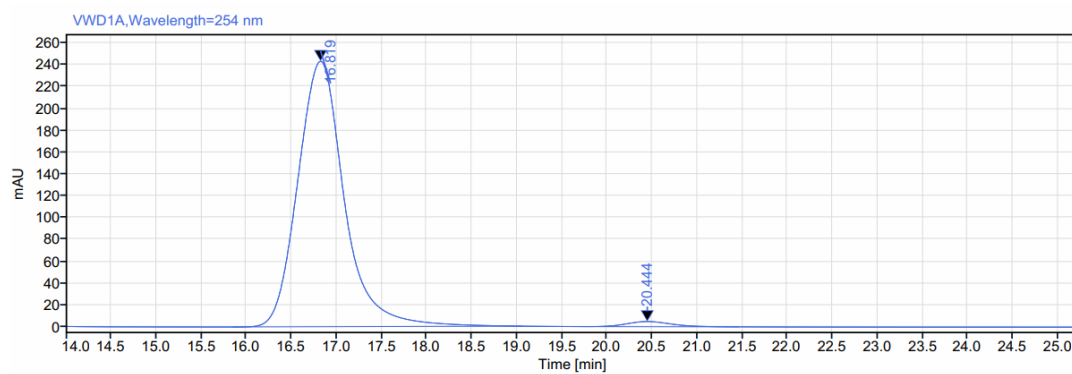

Signal: VWD1A,Wavelength=254 nm

| RT [min] | Type | Width [min] | Area    | Height | Area% | Name |
|----------|------|-------------|---------|--------|-------|------|
| 16.819   | MM m | 3.21        | 8719.32 | 243.47 | 98.15 |      |
| 20.444   | MM m | 1.72        | 164.73  | 4.78   | 1.85  |      |
| Sum      |      |             | 8884.05 |        |       |      |

HPLC (Chiralpak IA-3):  $t_R$  = 20.44 (major), 16.82 (minor)

Condition: 50:50, *n*-Hexane:*i*-PrOH, flow rate 1.0 mL/min, 25 °C, 254 nm.

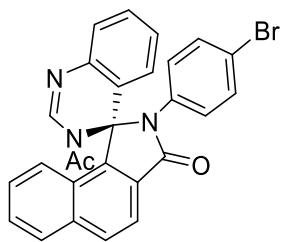

**5ap**

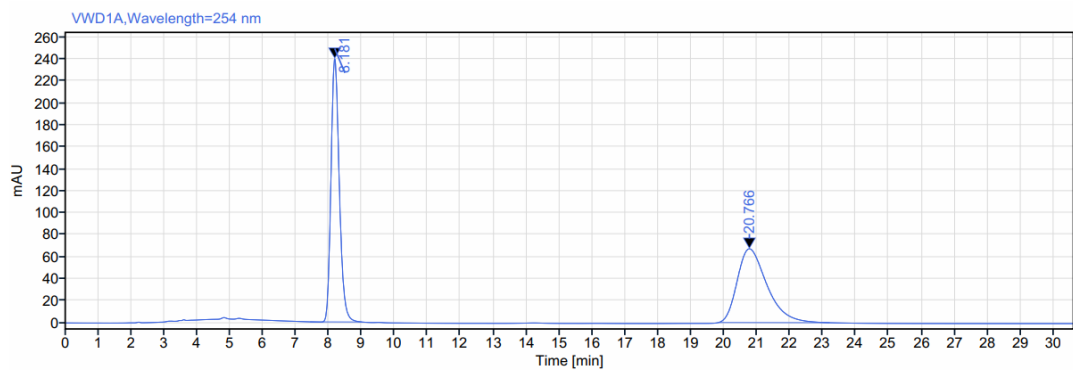

Signal: VWD1A, Wavelength=254 nm

| RT [min] | Type | Width [min] | Area    | Height | Area% | Name |
|----------|------|-------------|---------|--------|-------|------|
| 8.181    | MM m | 1.56        | 4213.51 | 239.85 | 50.02 |      |
| 20.766   | MM m | 3.37        | 4210.21 | 67.25  | 49.98 |      |
| Sum      |      |             | 8423.72 |        |       |      |

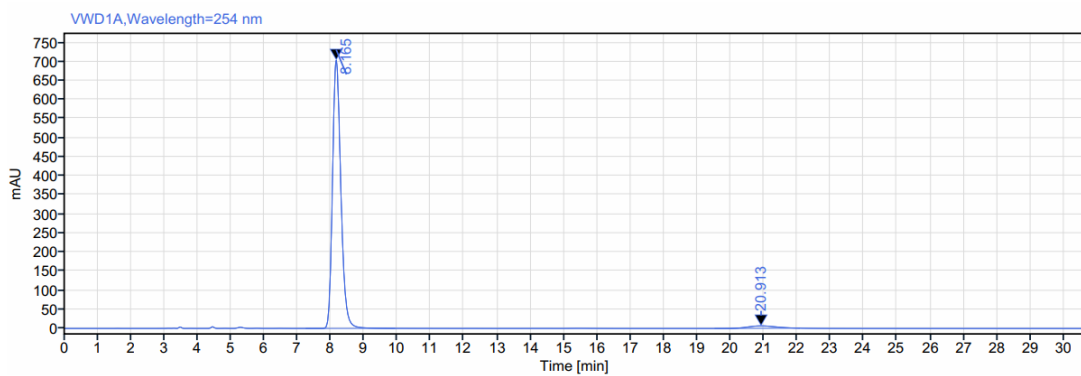

Signal: VWD1A, Wavelength=254 nm

| RT [min] | Type | Width [min] | Area     | Height | Area% | Name |
|----------|------|-------------|----------|--------|-------|------|
| 8.165    | MM m | 2.68        | 12329.59 | 704.16 | 96.98 |      |
| 20.913   | MM m | 2.56        | 384.09   | 6.50   | 3.02  |      |
| Sum      |      |             | 12713.68 |        |       |      |

HPLC (Chiralpak IC-3):  $t_R$  = 8.17 (major), 20.91 (minor)

Condition: 50:50, *n*-Hexane:*i*-PrOH, flow rate 1.0 mL/min, 25 °C, 254 nm.

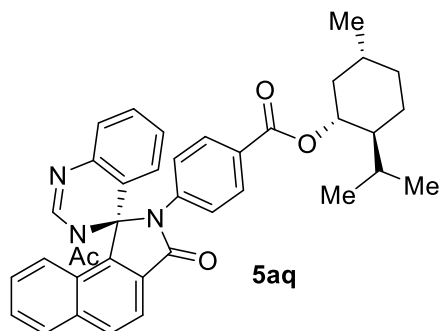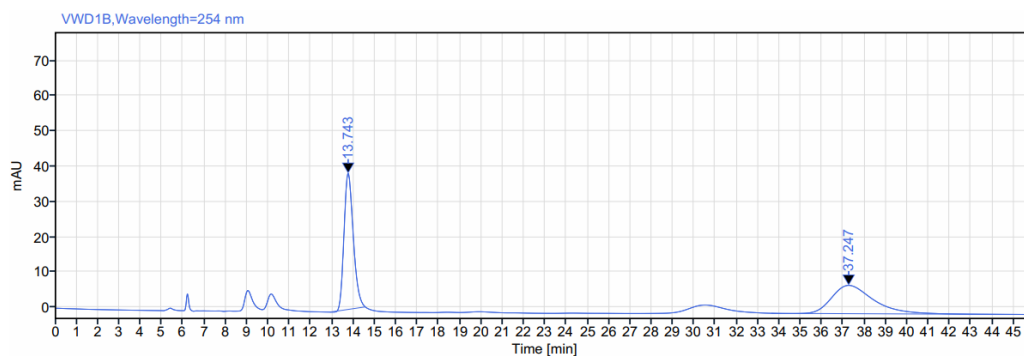

Signal: VWD1B,Wavelength=254 nm

| RT [min] | Type | Width [min] | Area    | Height | Area% | Name |
|----------|------|-------------|---------|--------|-------|------|
| 13.743   | MM m | 1.65        | 1166.03 | 38.58  | 51.53 |      |
| 37.247   | MM m | 20.72       | 1096.79 | 8.03   | 48.47 |      |
| Sum      |      |             | 2262.82 |        |       |      |

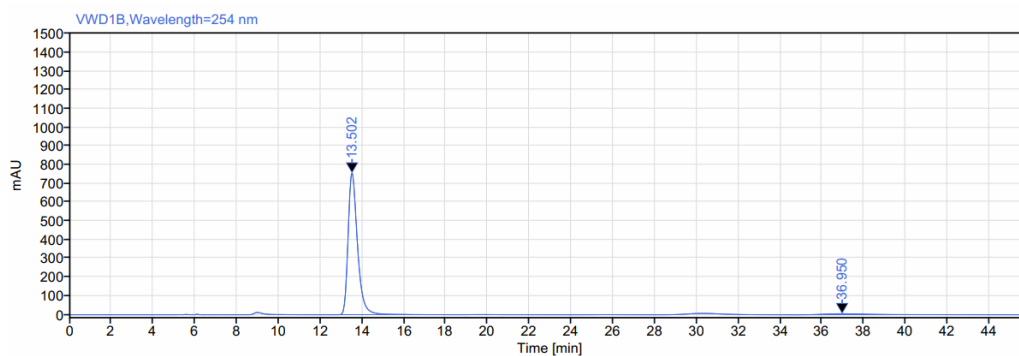

Signal: VWD1B,Wavelength=254 nm

| RT [min] | Type | Width [min] | Area     | Height | Area% | Name |
|----------|------|-------------|----------|--------|-------|------|
| 13.502   | MM m | 3.70        | 23525.35 | 755.99 | 97.20 |      |
| 36.950   | MM m | 6.14        | 678.28   | 5.17   | 2.80  |      |
| Sum      |      |             | 24203.62 |        |       |      |

HPLC (Chiralpak IC-3):  $t_R$  = 13.50 (major), 36.95 (minor)

Condition: 50:50, *n*-Hexane:*i*-PrOH, flow rate 0.7 mL/min, 25 °C, 254 nm.

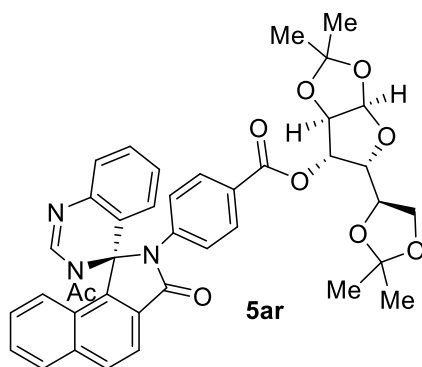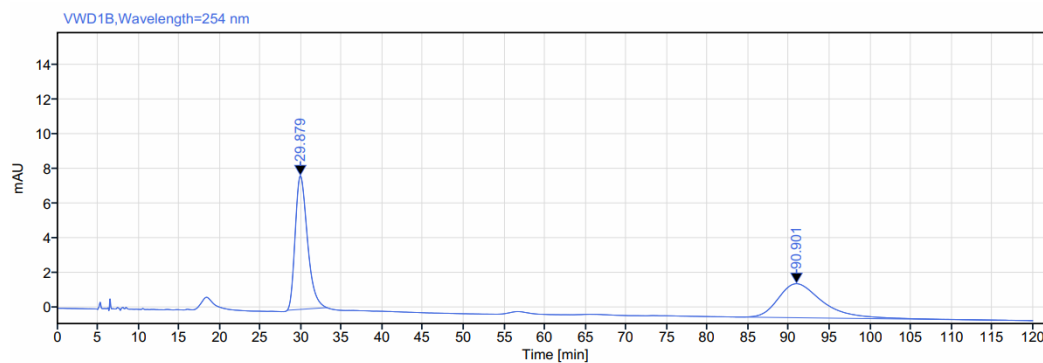

Signal: VWD1B,Wavelength=254 nm

| RT [min] | Type | Width [min] | Area    | Height | Area% | Name |
|----------|------|-------------|---------|--------|-------|------|
| 29.879   | MM m | 4.87        | 803.25  | 7.67   | 51.68 |      |
| 90.901   | MM m | 36.71       | 751.03  | 1.95   | 48.32 |      |
| Sum      |      |             | 1554.28 |        |       |      |

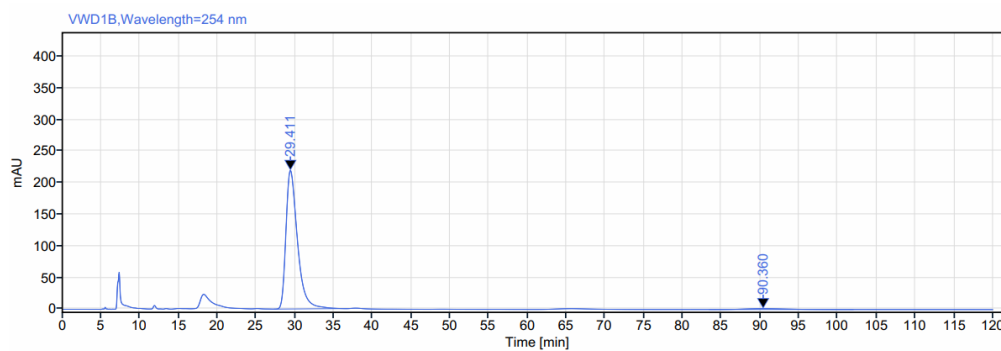

Signal: VWD1B,Wavelength=254 nm

| RT [min] | Type | Width [min] | Area     | Height | Area% | Name |
|----------|------|-------------|----------|--------|-------|------|
| 29.411   | MM m | 9.72        | 22642.18 | 219.52 | 97.80 |      |
| 90.360   | MM m | 18.63       | 509.51   | 1.36   | 2.20  |      |
| Sum      |      |             | 23151.69 |        |       |      |

HPLC (Chiralpak IC-3):  $t_R$  = 29.41 (major), 90.36 (minor)

Condition: 50:50, *n*-Hexane:*i*-PrOH, flow rate 0.7 mL/min, 25 °C, 254 nm.

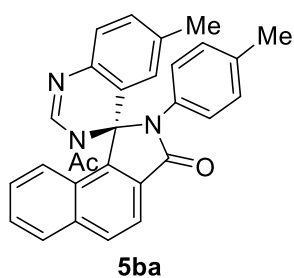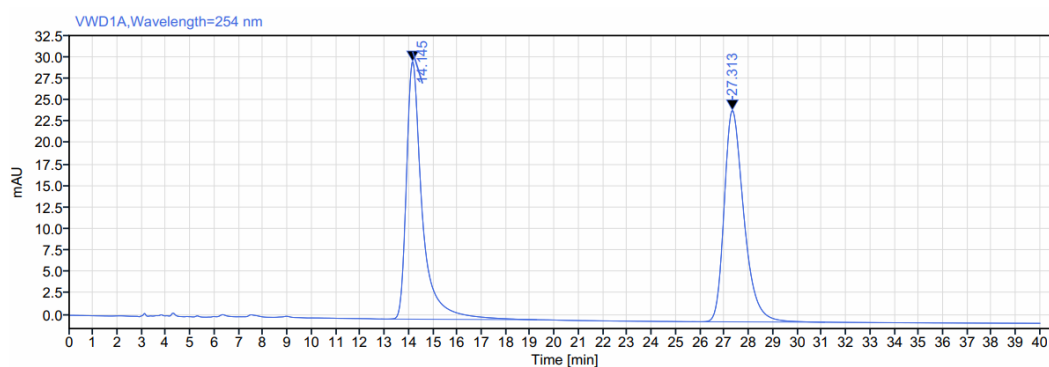

Signal: VWD1A,Wavelength=254 nm

| RT [min] | Type | Width [min] | Area    | Height | Area% | Name |
|----------|------|-------------|---------|--------|-------|------|
| 14.145   | MM m | 6.43        | 1362.43 | 29.98  | 49.59 |      |
| 27.313   | MM m | 5.49        | 1385.18 | 24.60  | 50.41 |      |
| Sum      |      |             | 2747.61 |        |       |      |

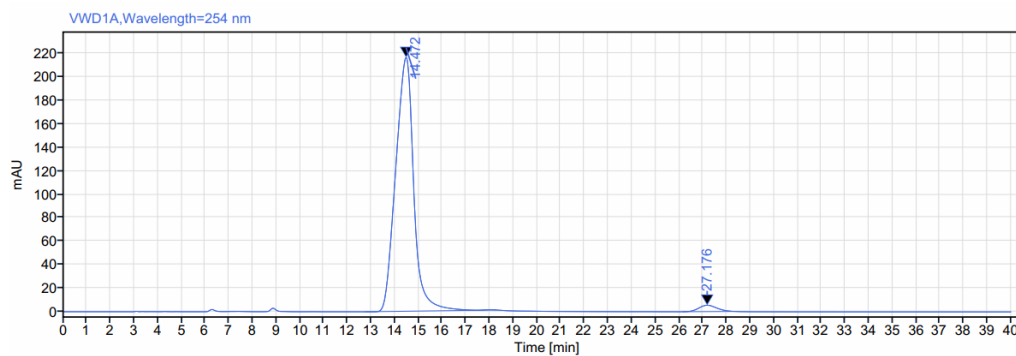

Signal: VWD1A,Wavelength=254 nm

| RT [min] | Type | Width [min] | Area     | Height | Area% | Name |
|----------|------|-------------|----------|--------|-------|------|
| 14.472   | MM m | 5.56        | 11435.15 | 216.58 | 97.54 |      |
| 27.176   | MM m | 2.22        | 287.91   | 5.44   | 2.46  |      |
| Sum      |      |             | 11723.06 |        |       |      |

HPLC (Chiralpak IA-3):  $t_R$  = 27.18 (major), 14.47 (minor)

Condition: 50:50, *n*-Hexane:*i*-PrOH, flow rate 1.0 mL/min, 25 °C, 254 nm.

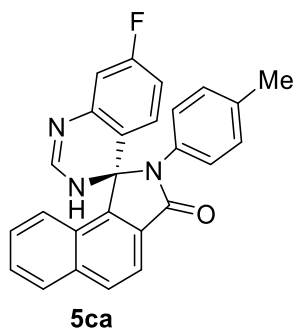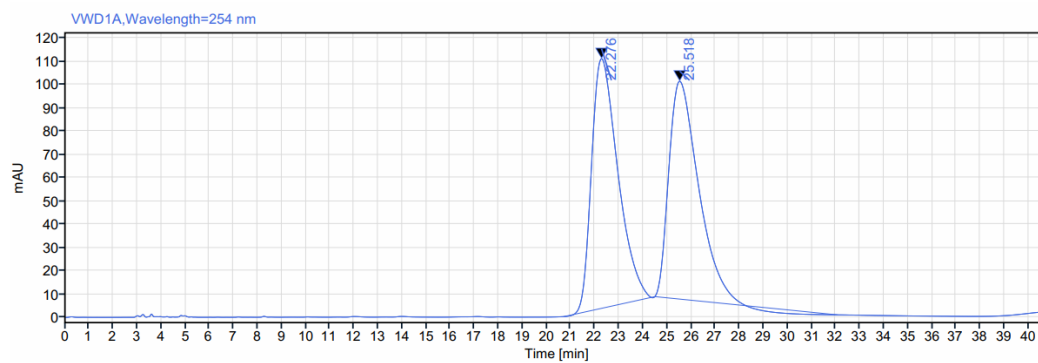

Signal: VWD1A,Wavelength=254 nm

| RT [min] | Type | Width [min] | Area     | Height | Area% | Name |
|----------|------|-------------|----------|--------|-------|------|
| 22.276   | MM m | 3.77        | 8181.23  | 107.35 | 51.05 |      |
| 25.518   | MM m | 7.58        | 7844.16  | 93.71  | 48.95 |      |
| Sum      |      |             | 16025.39 |        |       |      |

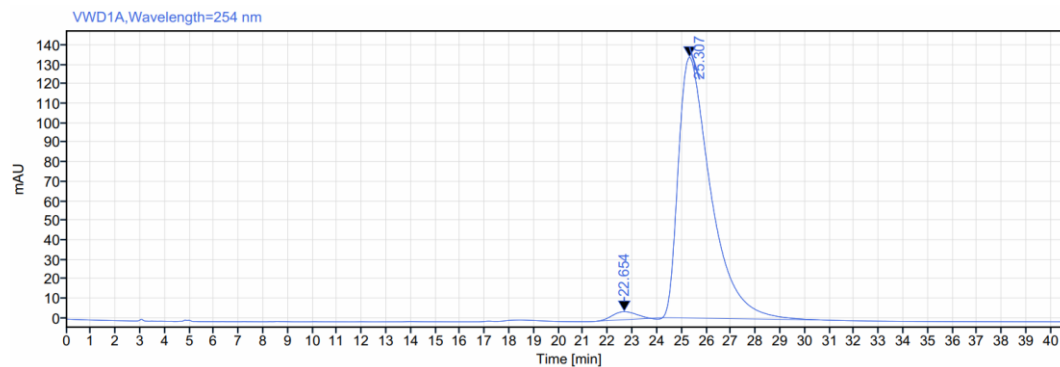

Signal: VWD1A,Wavelength=254 nm

| RT [min] | Type | Width [min] | Area     | Height | Area% | Name |
|----------|------|-------------|----------|--------|-------|------|
| 22.654   | MM m | 2.67        | 265.31   | 4.10   | 2.11  |      |
| 25.307   | MM m | 6.37        | 12283.86 | 133.95 | 97.89 |      |
| Sum      |      |             | 12549.17 |        |       |      |

HPLC (Chiralpak OD-3):  $t_R$  = 25.31 (major), 22.65 (minor)

Condition: 93:7, *n*-Hexane:*i*-PrOH, flow rate 1.0 mL/min, 25 °C, 254 nm.



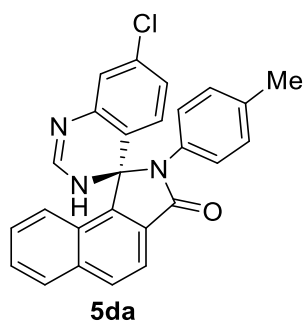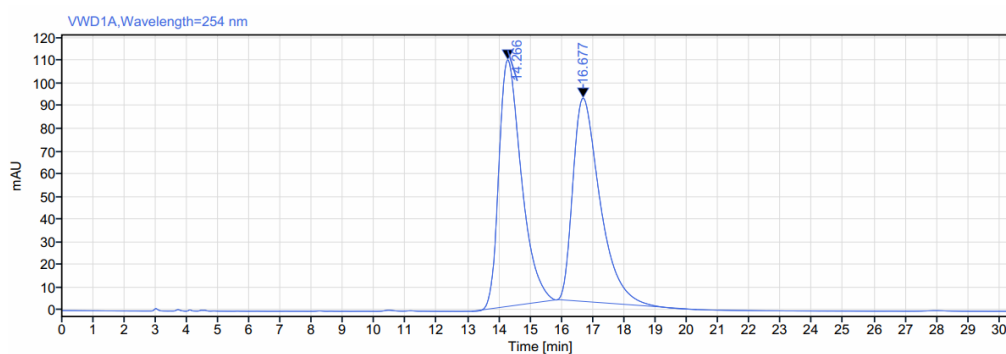

Signal: VWD1A,Wavelength=254 nm

| RT [min] | Type | Width [min] | Area     | Height | Area% | Name |
|----------|------|-------------|----------|--------|-------|------|
| 14.266   | MM m | 2.76        | 5443.92  | 108.52 | 50.19 |      |
| 16.677   | MM m | 4.44        | 5403.44  | 89.51  | 49.81 |      |
| Sum      |      |             | 10847.36 |        |       |      |

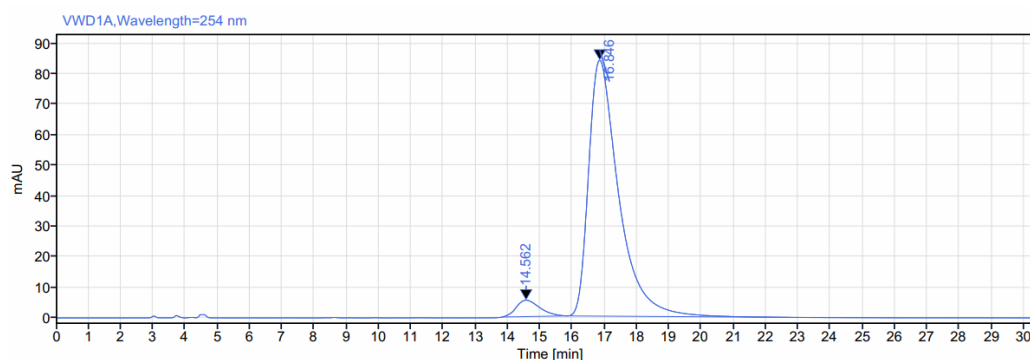

Signal: VWD1A,Wavelength=254 nm

| RT [min] | Type | Width [min] | Area    | Height | Area% | Name |
|----------|------|-------------|---------|--------|-------|------|
| 14.562   | MM m | 1.98        | 271.87  | 5.39   | 4.75  |      |
| 16.846   | MM m | 6.94        | 5446.21 | 83.99  | 95.25 |      |
| Sum      |      |             | 5718.08 |        |       |      |

HPLC (Chiralpak OD-3):  $t_R$  = 16.85 (major), 14.56 (minor)

Condition: 90:10, *n*-Hexane:*i*-PrOH, flow rate 1.0 mL/min, 25 °C, 254 nm.

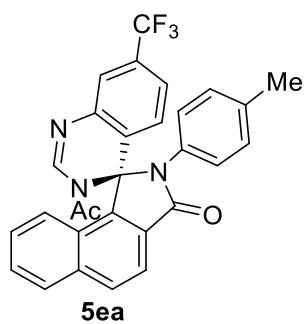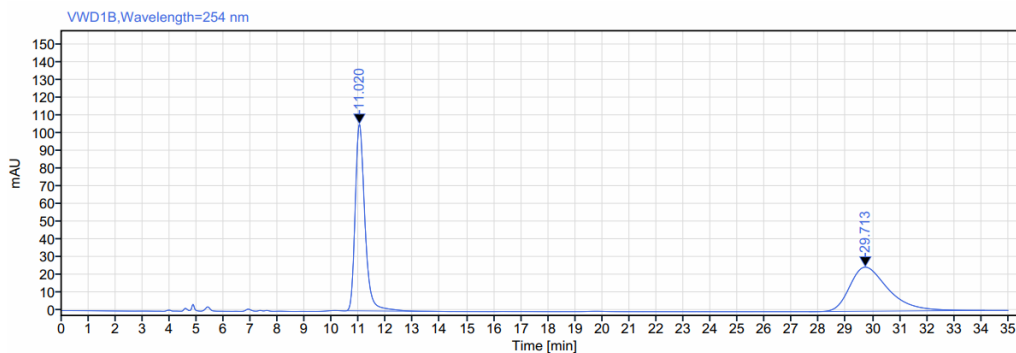

Signal: VWD1B,Wavelength=254 nm

| RT [min] | Type | Width [min] | Area    | Height | Area% | Name |
|----------|------|-------------|---------|--------|-------|------|
| 11.020   | MM m | 3.88        | 2624.65 | 105.05 | 51.65 |      |
| 29.713   | MM m | 6.49        | 2457.06 | 24.84  | 48.35 |      |
| Sum      |      |             | 5081.71 |        |       |      |

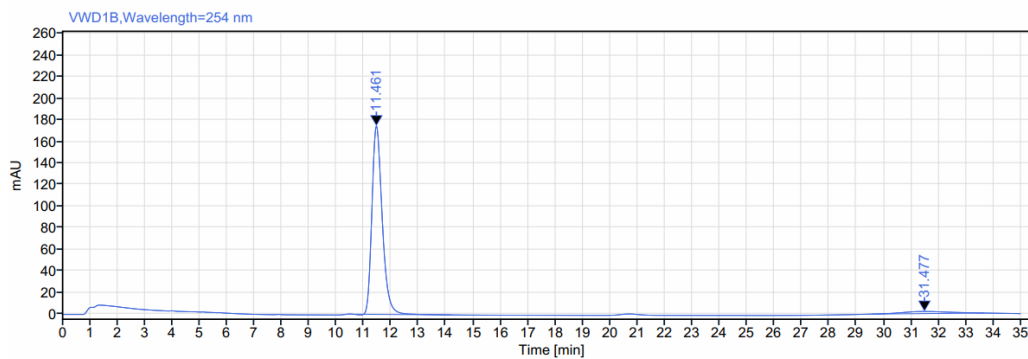

Signal: VWD1B,Wavelength=254 nm

| RT [min] | Type | Width [min] | Area    | Height | Area% | Name |
|----------|------|-------------|---------|--------|-------|------|
| 11.461   | MM m | 3.58        | 4575.54 | 174.56 | 95.07 |      |
| 31.477   | MM m | 4.12        | 237.14  | 1.97   | 4.93  |      |
| Sum      |      |             | 4812.68 |        |       |      |

HPLC (Chiralpak IC-3):  $t_R$  = 11.46 (major), 31.48 (minor)

Condition: 50:50, *n*-Hexane:*i*-PrOH, flow rate 0.8 mL/min, 25 °C, 254 nm.

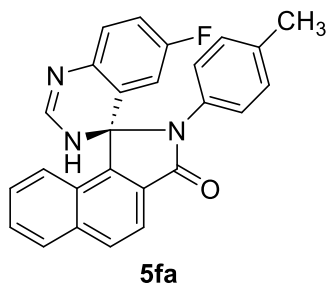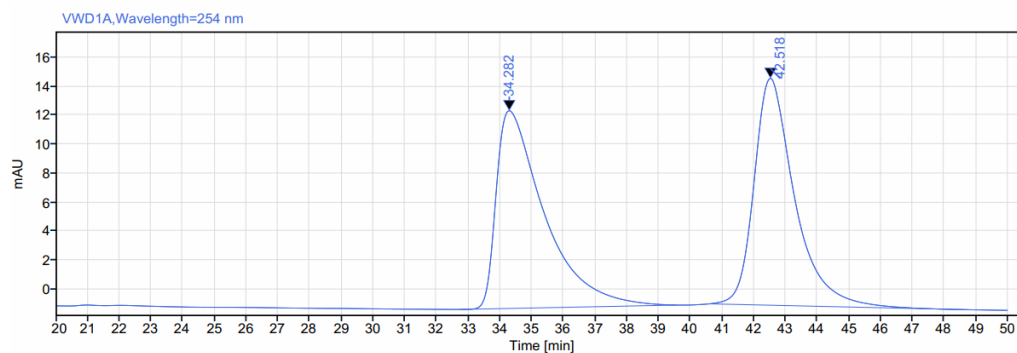

Signal: VWD1A,Wavelength=254 nm

| RT [min] | Type | Width [min] | Area    | Height | Area% | Name |
|----------|------|-------------|---------|--------|-------|------|
| 34.282   | MM m | 6.82        | 1435.59 | 13.66  | 50.74 |      |
| 42.518   | MM m | 8.17        | 1393.72 | 15.67  | 49.26 |      |
| Sum      |      |             | 2829.31 |        |       |      |

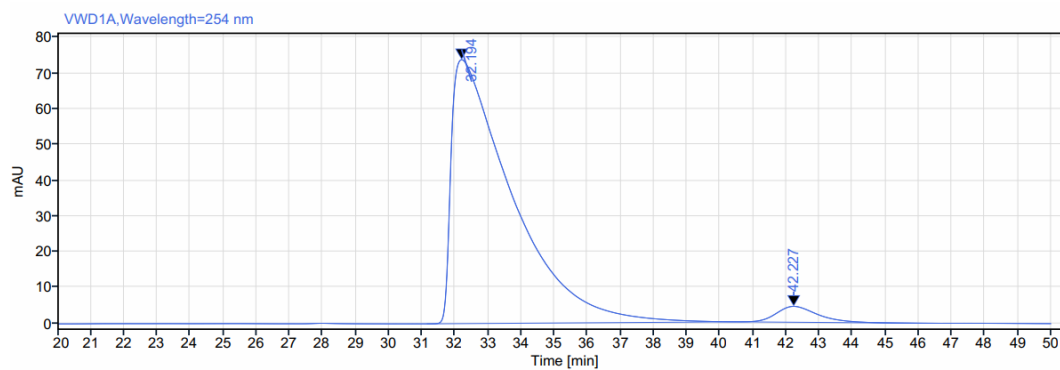

Signal: VWD1A,Wavelength=254 nm

| RT [min] | Type | Width [min] | Area    | Height | Area% | Name |
|----------|------|-------------|---------|--------|-------|------|
| 32.194   | MM m | 9.37        | 9408.56 | 73.92  | 96.09 |      |
| 42.227   | MM m | 6.06        | 382.73  | 4.45   | 3.91  |      |
| Sum      |      |             | 9791.29 |        |       |      |

HPLC (Chiralpak IA-3):  $t_R$  = 42.23 (major), 32.19 (minor)

Condition: 85:15, *n*-Hexane:*i*-PrOH, flow rate 1.0 mL/min, 25 °C, 254 nm.

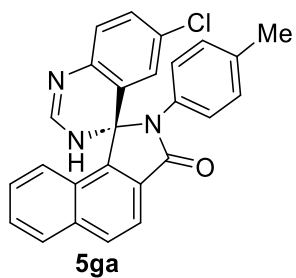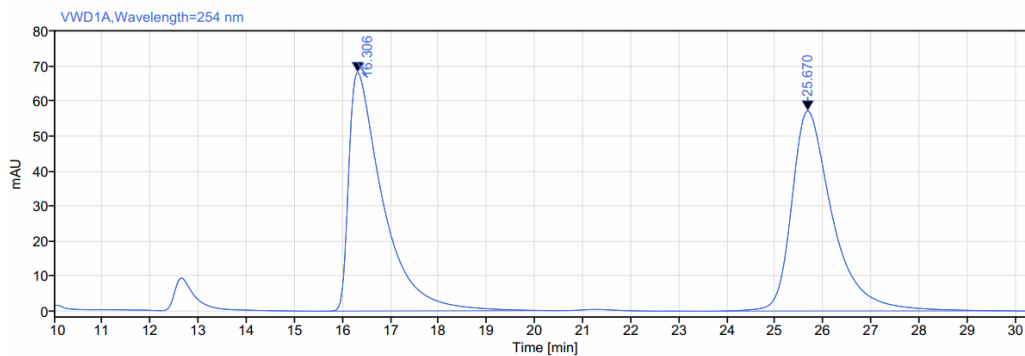

Signal: VWD1A,Wavelength=254 nm

| RT [min] | Type | Width [min] | Area    | Height | Area% | Name |
|----------|------|-------------|---------|--------|-------|------|
| 16.306   | MM m | 4.76        | 3346.60 | 68.26  | 49.80 |      |
| 25.670   | MM m | 5.84        | 3373.11 | 57.23  | 50.20 |      |
| Sum      |      |             | 6719.72 |        |       |      |

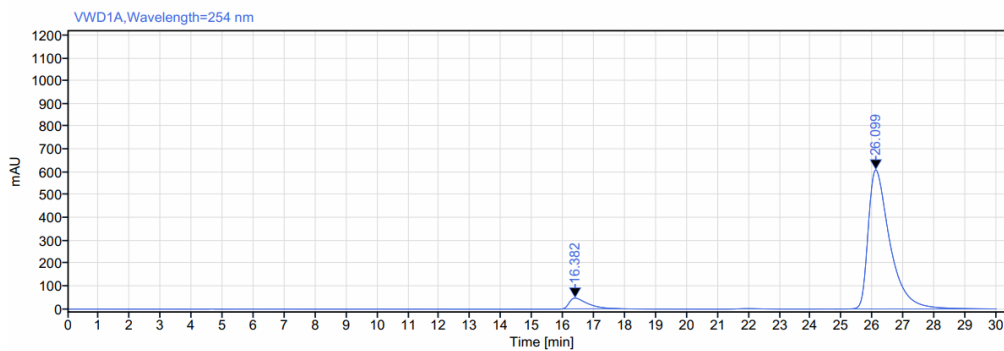

Signal: VWD1A,Wavelength=254 nm

| RT [min] | Type | Width [min] | Area     | Height | Area% | Name |
|----------|------|-------------|----------|--------|-------|------|
| 16.382   | MM m | 1.87        | 1915.80  | 47.24  | 6.05  |      |
| 26.099   | MM m | 5.26        | 29739.88 | 610.19 | 93.95 |      |
| Sum      |      |             | 31655.68 |        |       |      |

HPLC (Chiralpak IA-3):  $t_R$  = 26.10 (major), 16.38 (minor)

Condition: 80:20, *n*-Hexane:*i*-PrOH, flow rate 1.0 mL/min, 25 °C, 254 nm.

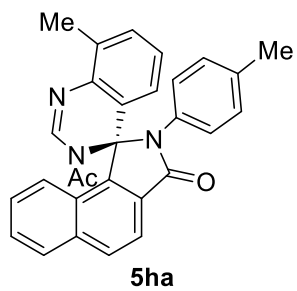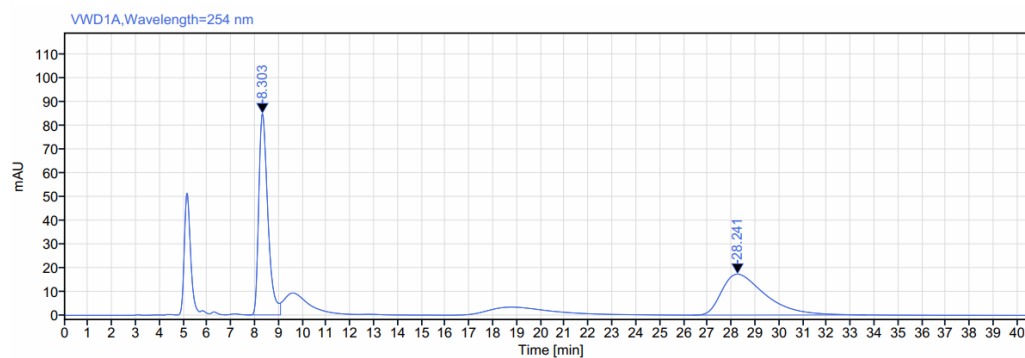

Signal: VWD1A,Wavelength=254 nm

| RT [min] | Type | Width [min] | Area    | Height | Area% | Name |
|----------|------|-------------|---------|--------|-------|------|
| 8.303    | MM m | 1.41        | 2244.87 | 84.77  | 50.58 |      |
| 28.241   | MM m | 7.30        | 2192.95 | 17.25  | 49.42 |      |
| Sum      |      |             | 4437.82 |        |       |      |

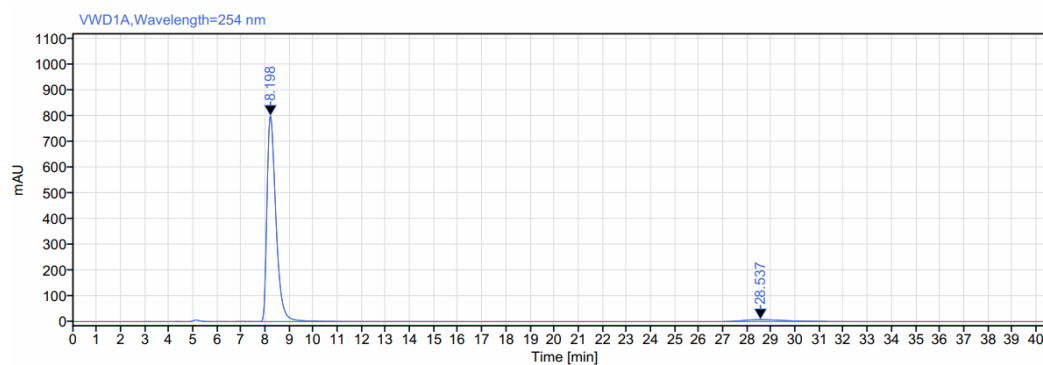

Signal: VWD1A,Wavelength=254 nm

| RT [min] | Type | Width [min] | Area     | Height | Area% | Name |
|----------|------|-------------|----------|--------|-------|------|
| 8.198    | MM m | 9.54        | 20723.14 | 798.74 | 95.93 |      |
| 28.537   | MM m | 4.29        | 879.06   | 7.56   | 4.07  |      |
| Sum      |      |             | 21602.20 |        |       |      |

HPLC (Chiralpak OD-3):  $t_R$  = 8.20 (major), 28.54 (minor)

Condition: 70:30, *n*-Hexane:*i*-PrOH, flow rate 1.0 mL/min, 25 °C, 254 nm.

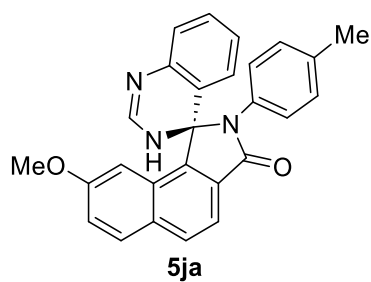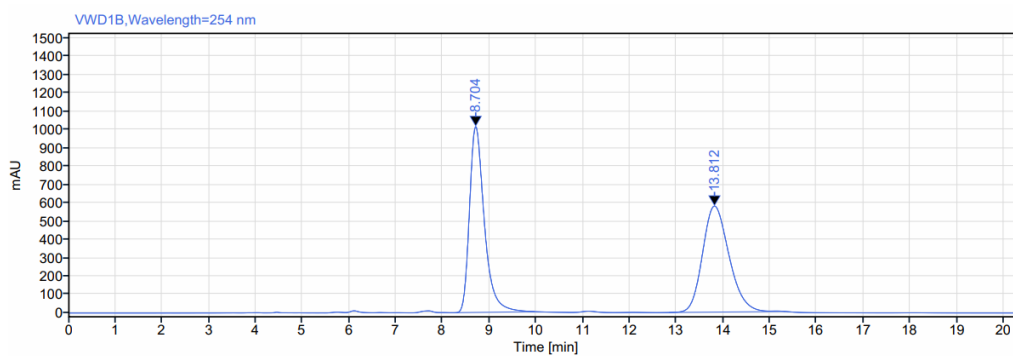

Signal: VWD1B,Wavelength=254 nm

| RT [min] | Type | Width [min] | Area     | Height  | Area% | Name |
|----------|------|-------------|----------|---------|-------|------|
| 8.704    | MM m | 1.79        | 22419.01 | 1015.21 | 49.56 |      |
| 13.812   | MM m | 2.49        | 22820.53 | 579.19  | 50.44 |      |
| Sum      |      |             | 45239.54 |         |       |      |

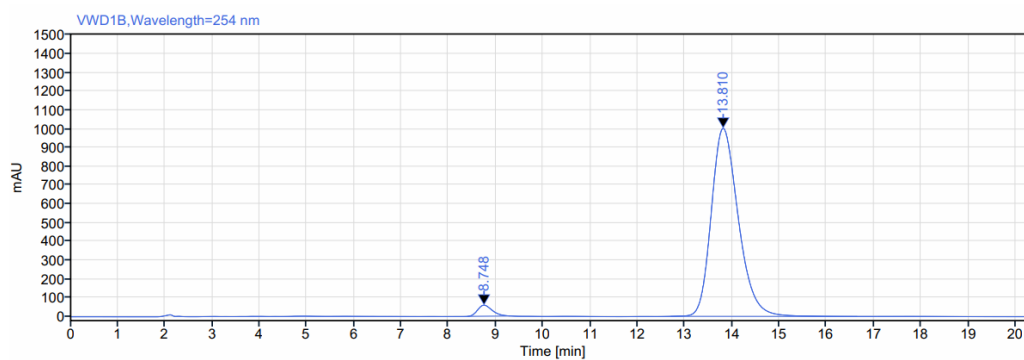

Signal: VWD1B,Wavelength=254 nm

| RT [min] | Type | Width [min] | Area     | Height  | Area% | Name |
|----------|------|-------------|----------|---------|-------|------|
| 8.748    | MM m | 0.91        | 1263.83  | 59.03   | 3.08  |      |
| 13.810   | MM m | 3.95        | 39834.75 | 1002.40 | 96.92 |      |
| Sum      |      |             | 41098.58 |         |       |      |

HPLC (Chiralpak IC-3):  $t_R$  = 13.81 (major), 8.75 (minor)

Condition: 50:50, *n*-Hexane:*i*-PrOH, flow rate 0.8 mL/min, 25 °C, 254 nm.

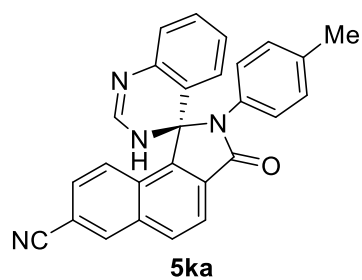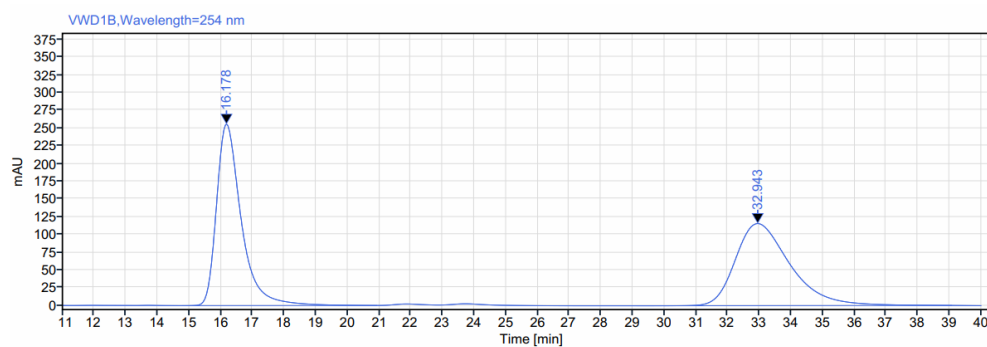

Signal: VWD1B,Wavelength=254 nm

| RT [min] | Type | Width [min] | Area     | Height | Area% | Name |
|----------|------|-------------|----------|--------|-------|------|
| 16.178   | MM m | 6.15        | 13876.79 | 255.68 | 50.05 |      |
| 32.943   | MM m | 9.09        | 13849.27 | 115.72 | 49.95 |      |
| Sum      |      |             | 27726.07 |        |       |      |

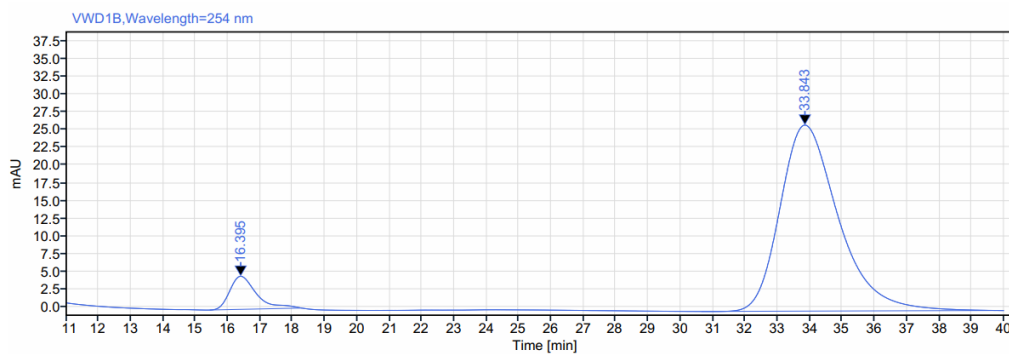

Signal: VWD1B,Wavelength=254 nm

| RT [min] | Type | Width [min] | Area    | Height | Area% | Name |
|----------|------|-------------|---------|--------|-------|------|
| 16.395   | MM m | 2.84        | 265.78  | 4.65   | 7.51  |      |
| 33.843   | MM m | 9.09        | 3270.89 | 26.12  | 92.49 |      |
| Sum      |      |             | 3536.67 |        |       |      |

HPLC (Chiralpak IC-3):  $t_R$  = 33.84 (major), 16.40 (minor)

Condition: 50:50, *n*-Hexane:*i*-PrOH, flow rate 0.8 mL/min, 25 °C, 254 nm.

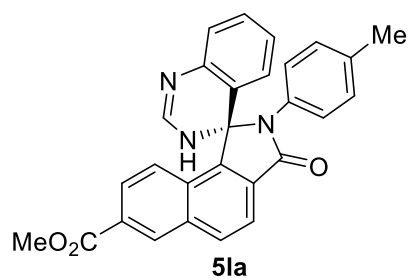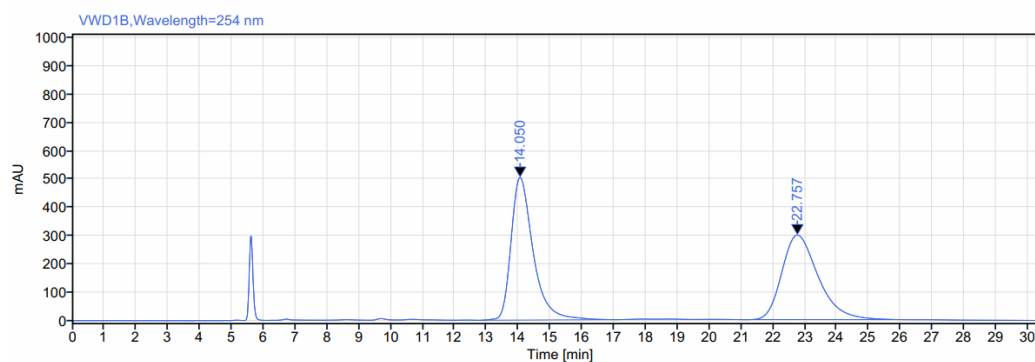

Signal: VWD1B,Wavelength=254 nm

| RT [min] | Type | Width [min] | Area     | Height | Area% | Name |
|----------|------|-------------|----------|--------|-------|------|
| 14.050   | MM m | 4.31        | 24327.66 | 505.45 | 50.62 |      |
| 22.757   | MM m | 4.57        | 23727.02 | 299.67 | 49.38 |      |
| Sum      |      |             | 48054.68 |        |       |      |

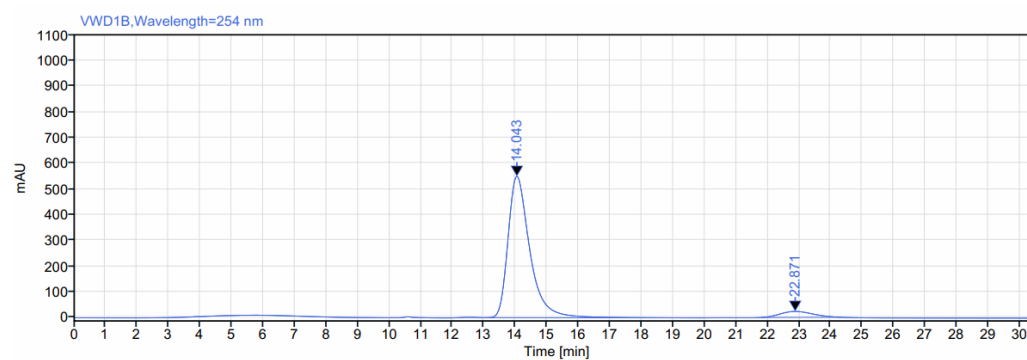

Signal: VWD1B,Wavelength=254 nm

| RT [min] | Type | Width [min] | Area     | Height | Area% | Name |
|----------|------|-------------|----------|--------|-------|------|
| 14.043   | MM m | 6.96        | 26486.97 | 549.87 | 94.01 |      |
| 22.871   | MM m | 2.54        | 1686.83  | 23.34  | 5.99  |      |
| Sum      |      |             | 28173.80 |        |       |      |

HPLC (Chiralpak IC-3):  $t_R$  = 14.04 (major), 22.87 (minor)

Condition: 50:50, *n*-Hexane:*i*-PrOH, flow rate 0.8 mL/min, 25 °C, 254 nm.



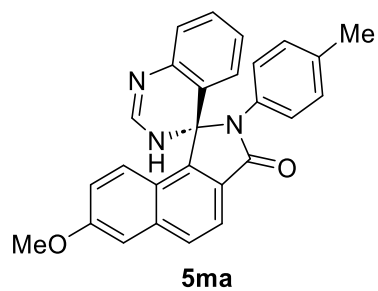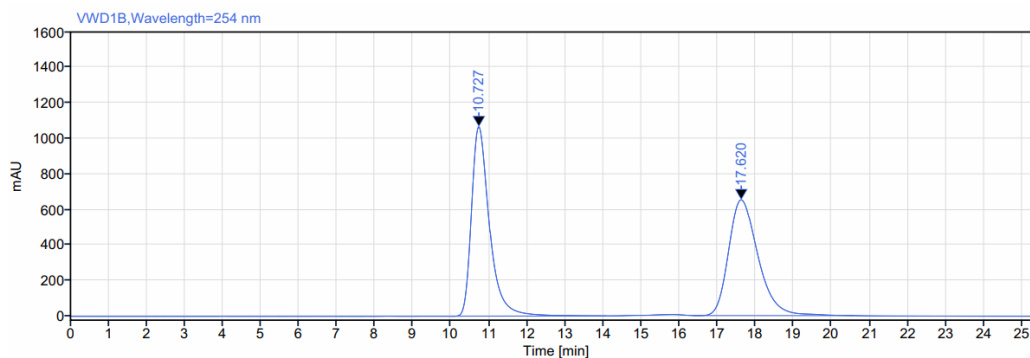

Signal: VWD1B,Wavelength=254 nm

| RT [min] | Type | Width [min] | Area     | Height  | Area% | Name |
|----------|------|-------------|----------|---------|-------|------|
| 10.727   | BB   | 4.04        | 35093.60 | 1067.09 | 50.09 |      |
| 17.620   | MM m | 4.22        | 34968.38 | 651.71  | 49.91 |      |
| Sum      |      |             | 70061.98 |         |       |      |

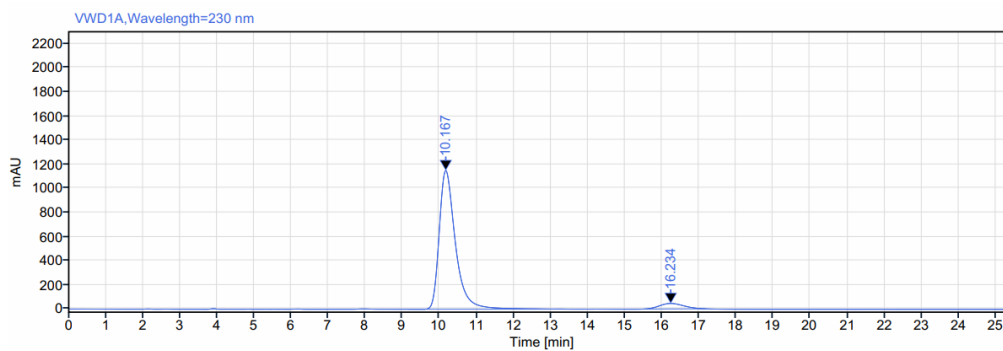

Signal: VWD1A,Wavelength=230 nm

| RT [min] | Type | Width [min] | Area     | Height  | Area% | Name |
|----------|------|-------------|----------|---------|-------|------|
| 10.167   | MM m | 5.02        | 35028.79 | 1149.27 | 94.46 |      |
| 16.234   | MM m | 1.65        | 2053.93  | 45.55   | 5.54  |      |
| Sum      |      |             | 37082.72 |         |       |      |

HPLC (Chiralpak IC-3):  $t_R$  = 10.17 (major), 16.23 (minor)

Condition: 50:50, *n*-Hexane:*i*-PrOH, flow rate 0.8 mL/min, 25 °C, 254 nm.

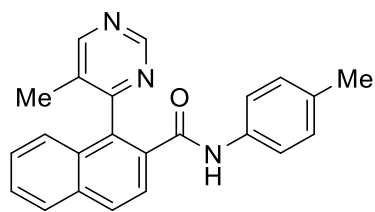

**5pa**

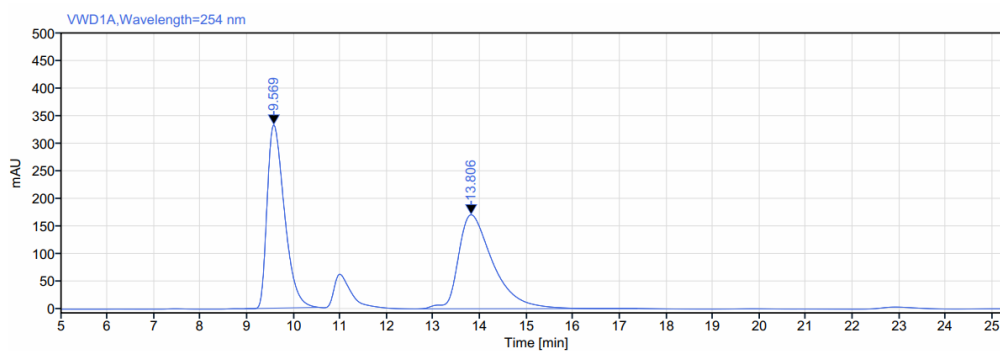

Signal: VWD1A,Wavelength=254 nm

| RT [min] | Type | Width [min] | Area     | Height | Area% | Name |
|----------|------|-------------|----------|--------|-------|------|
| 9.569    | MM m | 1.59        | 8571.77  | 331.99 | 49.37 |      |
| 13.806   | MM m | 4.70        | 8792.26  | 170.38 | 50.63 |      |
| Sum      |      |             | 17364.03 |        |       |      |

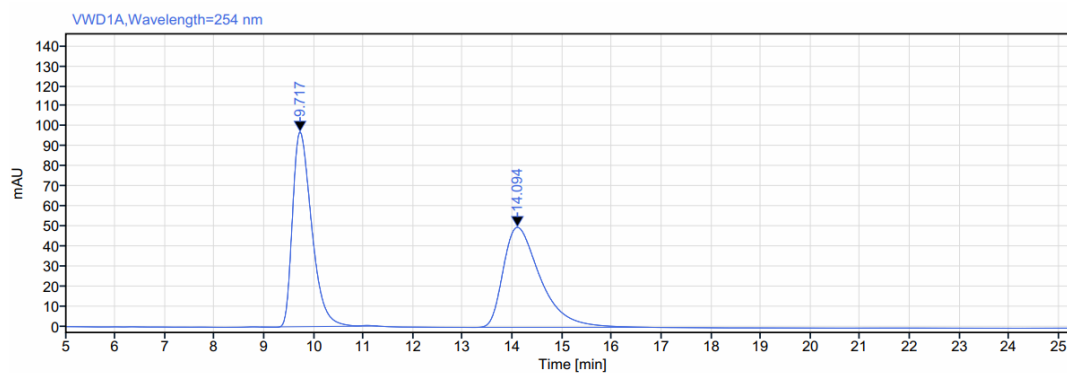

Signal: VWD1A,Wavelength=254 nm

| RT [min] | Type | Width [min] | Area    | Height | Area% | Name |
|----------|------|-------------|---------|--------|-------|------|
| 9.717    | MM m | 2.35        | 2605.27 | 97.29  | 50.07 |      |
| 14.094   | MM m | 3.79        | 2597.56 | 49.99  | 49.93 |      |
| Sum      |      |             | 5202.83 |        |       |      |

HPLC (Chiralpak OD-3):  $t_R$  = 9.72 (major), 14.01 (minor)

Condition: 90:10, *n*-Hexane:*i*-PrOH, flow rate 1.0 mL/min, 25 °C, 254 nm.

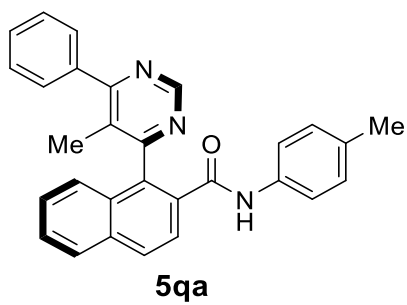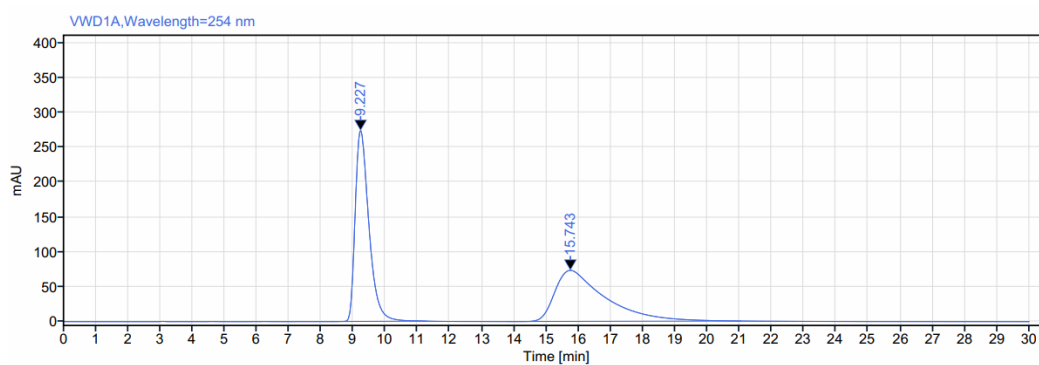

Signal: VWD1A,Wavelength=254 nm

| RT [min] | Type | Width [min] | Area     | Height | Area% | Name |
|----------|------|-------------|----------|--------|-------|------|
| 9.227    | MM m | 3.00        | 8130.41  | 274.25 | 50.70 |      |
| 15.743   | MM m | 7.26        | 7904.74  | 73.36  | 49.30 |      |
| Sum      |      |             | 16035.15 |        |       |      |

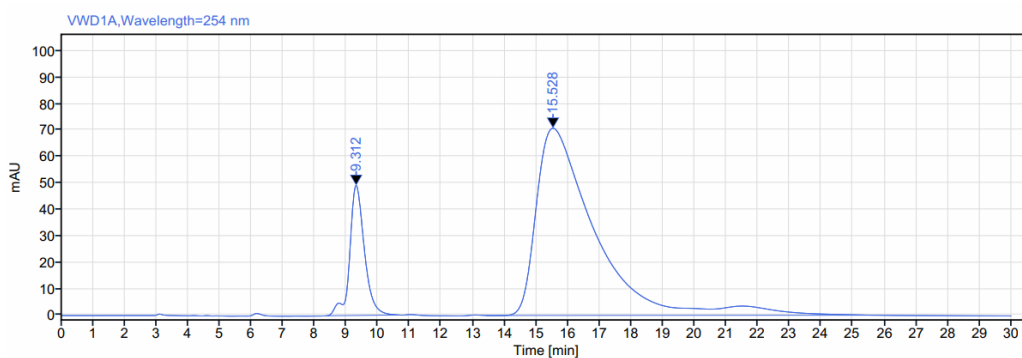

Signal: VWD1A,Wavelength=254 nm

| RT [min] | Type | Width [min] | Area     | Height | Area% | Name |
|----------|------|-------------|----------|--------|-------|------|
| 9.312    | MM m | 2.28        | 1592.11  | 49.21  | 14.82 |      |
| 15.528   | MM m | 12.27       | 9149.10  | 70.87  | 85.18 |      |
| Sum      |      |             | 10741.20 |        |       |      |

HPLC (Chiralpak OD-3):  $t_R$  = 9.31 (major), 15.53 (minor)

Condition: 90:10, *n*-Hexane:*i*-PrOH, flow rate 1.0 mL/min, 25 °C, 254 nm.

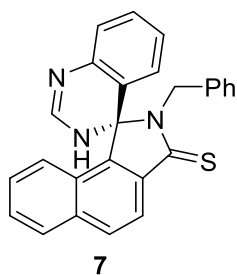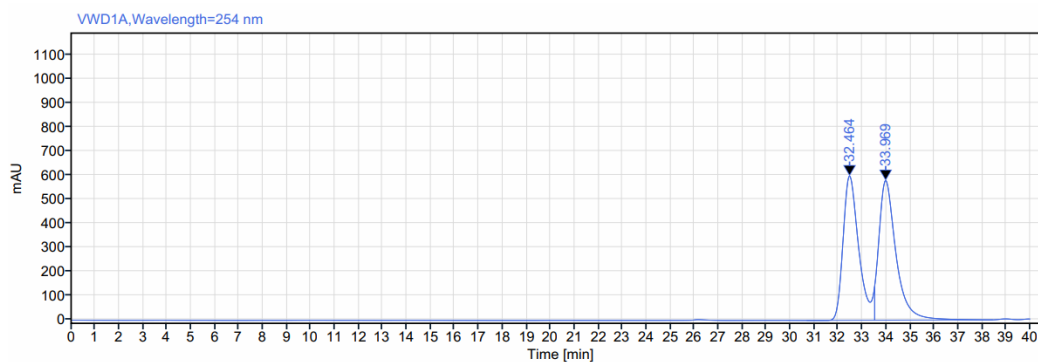

Signal: VWD1A, Wavelength=254 nm

| RT [min] | Type | Width [min] | Area     | Height | Area% | Name |
|----------|------|-------------|----------|--------|-------|------|
| 32.464   | MM m | 2.84        | 27241.46 | 596.95 | 48.90 |      |
| 33.969   | MM m | 4.93        | 28467.89 | 577.68 | 51.10 |      |
| Sum      |      |             | 55709.35 |        |       |      |

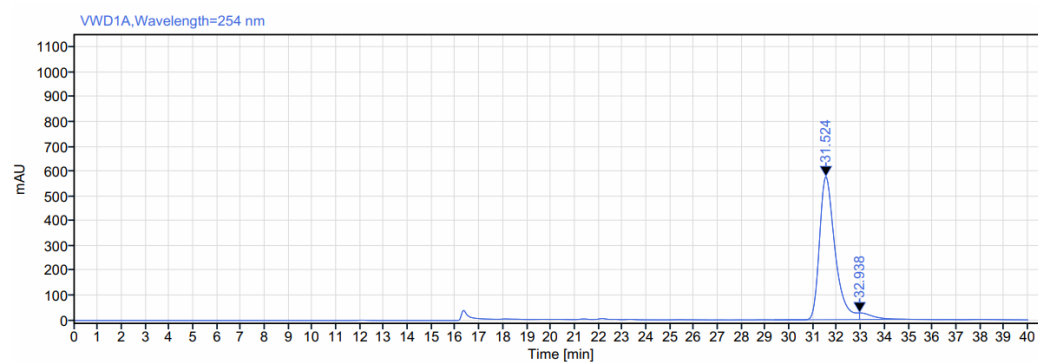

Signal: VWD1A, Wavelength=254 nm

| RT [min] | Type | Width [min] | Area     | Height | Area% | Name |
|----------|------|-------------|----------|--------|-------|------|
| 31.524   | MM m | 3.58        | 25981.19 | 575.82 | 96.31 |      |
| 32.938   | MM m | 1.93        | 996.03   | 26.35  | 3.69  |      |
| Sum      |      |             | 26977.22 |        |       |      |

HPLC (Chiralpak IC-3):  $t_R$  = 31.53 (major), 32.94 (minor)

Condition: 60:40, *n*-Hexane:*i*-PrOH, flow rate 0.2 mL/min, 25 °C, 254 nm.

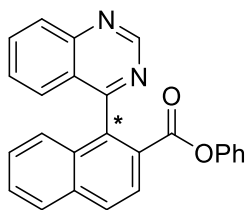

**12**

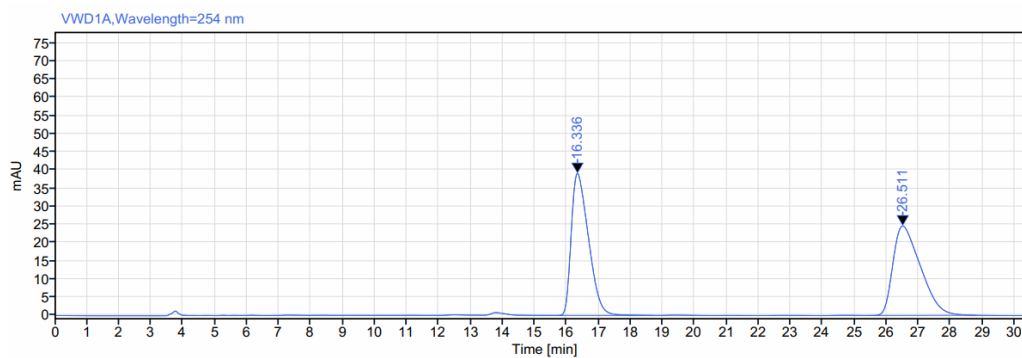

Signal: VWD1A,Wavelength=254 nm

| RT [min] | Type | Width [min] | Area    | Height | Area% | Name |
|----------|------|-------------|---------|--------|-------|------|
| 16.336   | MM m | 3.57        | 1463.95 | 39.07  | 49.87 |      |
| 26.511   | MM m | 3.42        | 1471.57 | 24.63  | 50.13 |      |
| Sum      |      |             | 2935.51 |        |       |      |

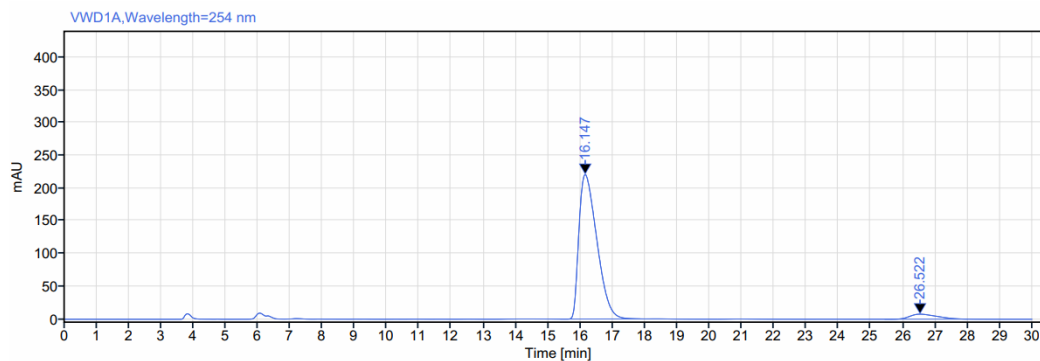

Signal: VWD1A,Wavelength=254 nm

| RT [min] | Type | Width [min] | Area    | Height | Area% | Name |
|----------|------|-------------|---------|--------|-------|------|
| 16.147   | MM m | 2.48        | 8511.76 | 220.69 | 95.07 |      |
| 26.522   | MM m | 2.59        | 441.49  | 7.64   | 4.93  |      |
| Sum      |      |             | 8953.25 |        |       |      |

HPLC (Chiralpak OD-3):  $t_R$  = 16.15 (major), 26.55 (minor)

Condition: 90:10, *n*-Hexane:*i*-PrOH, flow rate 1.0 mL/min, 25 °C, 254 nm.
